# Supplementary material for: Large-Scale Protein and Phosphoprotein Profiling to Explore Potato Resistance Mechanisms to Spongospora subterranea Infection
Source: Front Plant Sci. 2022 Apr 14;13:872901. doi: 10.3389/fpls.2022.872901 (PMC9047998; doi:10.3389/fpls.2022.872901)
Supplement: Supplementary file 1 [file Table_1.XLSX]

## Sheet: Total
GC1	GC2	GC3	GC4	GI1	GI2	GI3	GI4	IC1	IC2	IC3	IC4	II1	II2	II3	II4	PG.ProteinGroups	PG.ProteinDescriptions
18.2624	18.2412	18.2644	18.2936	18.2198	18.2126	18.2017	18.2196	18.251	18.1291	18.2444	18.2624	18.2314	18.1673	18.1629	18.1925	A0A0B4J3K8	GDP-mannose 3',5'-epimerase
17.8428	17.7719	17.9701	17.8595	17.6241	17.5309	17.9103	17.9566	18.0105	18.3645	18.3408	18.0505	17.8718	17.9013	17.9061	17.3379	A0A0C4B0N5	Photosystem II 10 kDa polypeptide, chloroplastic
17.9156	17.8114	17.814	17.7985	17.7822	17.7241	17.664	17.7065	17.665	17.6388	17.616	17.6364	17.5308	17.4268	17.4854	17.5107	A4UV11	60S ribosomal protein L34
16.4987	16.523	16.5491	16.516	16.7716	16.7824	16.7104	16.6708	16.8419	16.6904	16.7788	16.7717	16.9127	16.852	16.9149	16.9826	A8UGP3	1,2-dihydroxy-3-keto-5-methylthiopentene dioxygenase
16.7616	16.9078	16.8743	16.8022	17.2619	17.249	17.2061	17.2323	16.5579	16.6649	16.5428	16.6191	16.5431	16.5477	16.6947	16.6564	B3F8F4	Glutaredoxin
16.9377	16.7889	16.763	16.7883	16.6453	16.6562	16.6744	16.7313	16.7801	16.7879	16.8442	16.8144	16.0489	16.0867	16.0704	15.96	B5M4B1	Tubulin beta chain
12.4361	12.513	12.2135	12.6892	12.7693	13.182	12.6626	11.9803	13.7117	13.6015	13.8022	13.719	14.2784	13.7262	14.0516	14.0095	C0LUV3	Flavonol synthase;Flavonol synthase/flavanone 3-hydroxylase
18.849	18.8065	18.8746	18.8586	18.9727	18.8936	18.9389	18.9625	18.8119	18.768	18.783	18.7434	18.9138	18.9528	18.9329	19.0013	D5ILC3	Nucleoside diphosphate kinase
16.6858	16.6749	16.7904	16.6992	16.6777	16.6821	16.7785	16.6904	16.9073	16.9709	16.8908	16.9095	17.0492	17.0652	17.0594	17.0269	D5M912	Zeaxanthin epoxidase, chloroplastic
16.2478	16.1401	16.0206	16.2336	16.0575	15.8618	15.8745	15.843	15.3851	15.4362	15.4547	15.5195	14.6501	14.7701	14.5597	14.4734	E1AXT4	Beta-fructofuranosidase
19.3021	19.3032	19.2771	19.3039	19.2441	19.3003	19.3587	19.3281	19.2164	19.4018	19.234	19.2107	19.2553	19.4453	19.3074	19.272	I2FJZ8	Carbonic anhydrase (Fragment)
15.1707	15.2303	15.2345	15.1432	15.571	15.5451	15.4643	15.4671	15.7035	15.7401	15.6685	15.678	15.7114	15.7207	15.6756	15.6671	J9ULI1	Osmotic stress-activated protein kinase
19.6096	18.7291	19.2328	19.2899	19.1082	19.1439	19.1898	19.2134	19.195	19.1995	19.1407	19.261	19.0404	19.2633	19.0474	18.9597	K7VK53	Light-inducible protein ATLS1
18.5406	18.5742	18.5699	18.491	18.4162	18.5591	18.4597	18.4434	18.3405	18.4388	18.3963	18.3828	18.2155	18.1693	18.2507	18.1605	K7W5I7	60S ribosomal protein L36
15.9601	16.0014	15.9307	15.8586	16.2336	16.1857	16.1103	16.184	15.9864	15.7367	15.8105	15.8384	15.6473	15.4791	15.7323	15.8021	K7W5R9	Calcium load-activated calcium channel
16.1828	16.1089	16.1105	16.1052	16.3709	16.2702	16.2483	16.294	16.5242	16.4533	16.4518	16.4852	16.3201	16.3682	16.3639	16.322	K7WNV9	Thioredoxin H-type 2
16.4345	16.3905	16.4299	16.4362	16.7545	16.578	16.7033	16.6002	16.7287	16.7126	16.6767	16.6746	17.0306	16.9906	16.9523	16.9509	K7WNY2	Glyceraldehyde-3-phosphate dehydrogenase
18.2021	18.2092	18.2609	18.274	18.3616	18.4703	18.4197	18.3621	18.3641	18.3815	18.4027	18.4318	18.5057	18.5932	18.4722	18.4562	K7WP02	ADP, ATP carrier protein;ADP,ATP carrier protein, mitochondrial (Fragment)
17.3252	17.355	17.3217	17.2979	17.1586	17.2001	17.1674	17.0962	17.3471	17.4101	17.3804	17.4507	17.339	17.2412	17.2981	17.2834	K7WU45	Fructokinase 3
14.7352	14.718	14.8383	14.7149	15.393	14.3397	15.0342	14.7997	14.8881	13.1481	14.5153	14.4802	14.6865	14.2647	14.5308	14.5216	K7WVC7	ER membrane protein complex subunit 2
16.4398	16.3838	16.3279	16.4139	16.4798	16.3064	16.4051	16.4745	16.2688	16.2828	16.2468	16.4082	16.236	16.2637	16.2865	16.3072	K7X8C6	Ubiquitin-conjugating enzyme E2 36
15.8314	15.7215	15.664	15.6844	15.609	15.541	15.4012	15.614	15.3412	15.2624	15.4555	15.2526	15.2254	15.1681	15.1833	15.3195	K7XKP4	60S ribosomal protein L10
17.6936	17.5738	17.6453	17.6316	17.5524	17.4901	17.5331	17.5558	17.5271	17.4717	17.501	17.541	17.4098	17.3887	17.4113	17.3971	K7XKT4	60S ribosomal protein L1
16.9096	16.8829	16.8753	16.8583	17.0501	16.9801	17.0338	17.1356	16.5498	16.6619	16.602	16.6946	16.2656	16.4149	16.3612	16.4482	K7XKT7	UDP-arabinopyranose mutase;Probable UDP-arabinopyranose mutase 1
15.4928	15.5639	15.4654	15.3364	15.5507	15.8013	15.418	15.6064	13.8931	11.6656	13.9101	13.8719	13.0628	13.4046	13.18	13.1813	K9MBM3	Beta-1,3-glucanase 28;Glucan endo-1,3-beta-glucosidase, acidic isoform GI9
14.6655	14.5726	14.5863	14.6596	14.2834	14.2187	14.3417	14.4338	14.7126	14.6503	14.7564	14.714	14.3861	14.3972	14.4312	14.381	M0ZG32	Acetyl-CoA carboxytransferase
15.697	15.6791	15.8034	15.7336	16.2101	16.1507	16.1349	16.1275	15.8878	15.8011	15.8633	15.8128	16.0417	16.1183	16.1743	16.1412	M0ZG39	Synaptotagmin
16.1822	16.1624	16.1342	16.2328	16.1095	16.1362	16.0828	16.1276	16.5968	16.5266	16.5927	16.5917	16.6209	16.594	16.5827	16.5647	M0ZG71	Sialin
16.683	16.5893	16.7066	16.6998	16.6724	16.6107	16.6976	16.757	16.669	16.5516	16.6377	16.6581	16.6252	16.6873	16.6694	16.6348	M0ZG73	Cysteine synthase;Bifunctional L-3-cyanoalanine synthase/cysteine synthase 2, mitochondrial
15.0478	15.1178	15.0275	15.0514	15.8033	15.2104	15.489	15.6623	15.2285	15.2279	15.1515	15.3265	15.2447	14.7948	14.5143	14.7819	M0ZG93	Mitogen-activated protein kinase
15.3864	15.4657	15.5033	15.3891	15.5709	15.5917	15.5692	15.5934	15.2908	15.2965	15.2365	15.3854	15.3191	15.4188	15.3166	15.3634	M0ZGA7	Proline iminopeptidase
15.4764	15.8317	15.6815	15.3396	15.3074	15.4218	15.3001	15.4649	14.878	15.334	15.0926	15.1913	15.1813	15.1594	14.6485	15.2943	M0ZGI3	Eukaryotic translation initiation factor 3 subunit
13.6353	13.5003	13.4241	13.5035	13.7814	13.8017	13.6015	13.6275	13.724	13.5401	13.713	13.7176	13.8384	13.7883	13.8911	13.7523	M0ZGK0	Importin-alpha re-exporter
17.0761	16.9492	17.1975	17.1499	16.9478	16.8043	17.1099	17.2713	14.2943	14.8162	14.2279	14.7372	14.2258	14.7368	14.253	14.8332	M0ZGL3	Uncharacterized protein
14.1873	13.8291	14.4257	14.3512	14.6007	14.2381	14.5331	14.8997	13.5774	13.8595	13.6002	14.1611	13.5372	13.9202	13.9791	14.39	M0ZGL7	Cytochrome b5 isoform Cb5-A
14.4164	14.4927	14.5466	14.4888	14.5434	14.4018	14.7392	14.436	14.1281	14.5769	14.1338	14.2538	13.732	13.7154	13.2592	13.6489	M0ZGP0	Gibberellin receptor GID1
13.9382	14.0879	14.0412	13.9781	13.9595	14.0995	14.0604	13.9191	14.1911	14.2309	14.4066	14.396	14.3997	14.2567	14.2305	14.2735	M0ZGQ9	Methenyltetrahydrofolate cyclohydrolase
15.5342	15.4943	15.5761	15.5069	15.4213	15.3424	15.4505	15.5288	15.5833	15.6373	15.5505	15.6175	15.5261	15.6121	15.5592	15.5694	M0ZGR0	KEA1 (K EFFLUX ANTIPORTER 1)
15.285	15.4481	15.4679	15.3622	15.3817	15.4684	15.4999	15.4445	15.84	16.0954	15.8542	15.9469	16.1287	15.9953	16.0647	16.107	M0ZGS2	Remorin 2
16.5098	16.4614	16.4254	16.4108	16.3819	16.0644	15.9498	16.2898	16.421	16.0442	16.2211	16.3513	16.491	16.4222	16.4217	16.5654	M0ZGT0	Diaminohydroxyphosphoribosylaminopyrimidine deaminase
14.9506	14.8738	14.7028	14.6125	15.2624	14.9992	15.0136	14.9433	14.6989	14.9129	14.6613	14.3009	14.6641	14.5751	14.7064	14.7673	M0ZGX2	Uncharacterized protein
18.3445	18.4185	18.2294	18.297	18.3868	18.319	18.2349	18.288	18.4391	18.3851	18.4128	18.3803	18.5856	18.5282	18.4172	18.4095	M0ZGZ6	Thylakoid membrane phosphoprotein 14 kDa, chloroplast
16.803	16.9263	16.8876	16.7959	16.8783	16.89	16.8249	16.8597	17.0676	17.1361	17.0634	17.1103	17.3242	17.3085	17.3288	17.339	M0ZH08	Chitinase
13.1638	13.2494	13.3164	13.2064	13.7646	13.5371	13.4496	13.5683	13.4027	12.7965	13.2726	13.2644	13.1896	13.2708	13.3219	13.3652	M0ZH30	Phragmoplastin
15.5599	15.4686	15.5199	15.6394	15.4607	15.2762	15.5098	15.5417	15.5362	15.3891	15.5569	15.5886	15.3265	15.3529	15.3416	15.4649	M0ZH90	Nucleosome assembly protein 1 2
13.1539	13.9234	13.1459	13.8573	13.4475	13.416	13.2698	13.2116	13.523	12.8226	13.3637	12.5642	13.4887	12.5858	13.2282	12.8424	M0ZHA3	Mitochondrial ATP synthase g subunit family protein
15.7442	15.7066	15.644	15.5373	15.9514	15.9802	15.9749	16.1155	15.5539	15.4074	15.6268	15.6815	15.7052	15.6159	15.6939	15.7347	M0ZHA9	Gamma glutamyl transpeptidases
14.5119	14.4197	14.6144	14.5245	14.8891	14.6206	14.8494	14.7228	14.6298	14.5695	14.602	14.6033	14.7319	14.8494	14.7886	14.7363	M0ZHB0	Alpha-MPP
18.0834	18.1799	18.1027	18.0591	18.4317	18.2636	18.1534	18.2256	18.186	18.2969	18.1315	18.0018	18.266	18.1438	18.3143	18.249	M0ZHB2	Profilin
16.4267	16.413	16.4811	16.4419	16.5845	16.5195	16.4753	16.5054	16.4111	16.4279	16.4842	16.4385	16.5265	16.507	16.5551	16.5872	M0ZHB7	Phosphotransferase
18.2135	18.2145	18.2674	18.2139	18.3955	18.4004	18.4783	18.4022	18.2769	18.2948	18.2863	18.2672	18.3677	18.4251	18.3791	18.3025	M0ZHD0	Glyoxalase I
14.5236	14.4291	14.5081	14.5066	14.5592	14.5595	14.4215	14.6383	14.3474	14.278	14.3136	14.2658	14.0357	14.1978	14.2337	13.9136	M0ZHF7	Aldehyde dehydrogenase
12.2232	12.4487	12.5126	12.529	12.7845	12.4133	12.6159	12.7312	12.3232	12.4253	12.3935	12.4508	12.3106	12.7385	12.455	12.4069	M0ZHF8	GTP-ase activating protein for Arf containing protein
17.0863	17.0382	16.9034	16.9594	16.925	16.8705	16.8959	16.8555	16.7359	16.9167	16.8006	16.887	16.5998	16.8096	16.661	16.6425	M0ZHK6	60S ribosomal protein L31
14.3394	14.1437	14.0928	14.233	14.5783	14.3321	13.9797	14.1764	13.5967	13.5061	13.6466	13.7154	13.6832	13.6331	13.6725	13.4696	M0ZHL0	Iaa-amino acid hydrolase 11
15.8045	15.7588	15.7668	15.7483	15.7584	15.8392	15.7216	15.7907	15.8253	15.7467	15.7632	15.7497	15.7928	15.6988	15.7842	15.7607	M0ZHM4	Arginine--tRNA ligase
14.0138	14.2384	13.0469	13.9091	13.8504	13.5833	13.8001	13.726	13.754	13.9598	13.6662	13.6555	13.6393	13.6793	13.369	13.6937	M0ZHP1	GAMYB-binding protein
15.5388	15.6212	15.5234	15.616	15.9087	15.8629	15.8315	15.82	15.7482	15.7761	15.8145	15.7132	15.8677	16.0123	15.8346	15.9319	M0ZHQ8	3-hydroxyacyl-CoA dehydrogenase
16.1785	16.2137	16.1944	16.1441	16.1326	16.0296	16.0528	16.1293	15.7504	15.8217	15.8351	15.8759	15.7746	15.7527	15.8623	15.8056	M0ZHR2	Signal peptidase I
16.1375	16.0866	16.0664	16.1435	15.6001	15.7173	15.7023	15.6514	15.5724	15.6519	15.6515	15.696	15.3626	15.4129	15.3028	15.2947	M0ZHR6	Mrp protein
15.5821	15.5773	15.6503	15.5886	15.6302	15.6875	15.7783	15.674	15.623	15.9198	15.7783	16.003	15.562	15.8074	15.5446	15.521	M0ZHT9	Heat shock protein 70-3
17.3054	17.2836	17.0454	17.1737	16.9821	17.1094	17.0263	16.9456	17.0523	17.132	17.1245	17.0335	17.0972	16.9321	16.9786	17.0304	M0ZHU3	Inner membrane protein PPF-1, chloroplast
20.6628	20.7323	20.6572	20.5608	20.4887	20.618	20.3778	20.359	20.9708	20.9466	20.8652	21.0495	21.1739	20.9676	21.0436	21.0569	M0ZHU8	Histone H4
20.9263	20.9625	20.8526	20.8415	21.3122	21.1287	21.335	21.1227	20.1797	20.4024	20.0686	20.0951	20.345	20.422	20.4184	20.3607	M0ZHX4	Superoxide dismutase [Cu-Zn]
15.2394	15.3405	15.2884	15.3068	15.5474	15.5291	15.4643	15.4418	14.3018	14.0644	14.3112	14.1555	14.3601	14.3403	14.3585	14.3528	M0ZHY5	Carboxypeptidase
14.5503	14.6393	14.3274	14.3636	14.6663	14.4382	14.2306	14.2872	14.903	14.3733	14.6546	14.672	14.7691	14.6806	14.5964	14.7645	M0ZHZ3	Protease
15.037	14.6197	14.7747	14.9181	15.2968	15.4928	15.2615	14.9526	15.1716	15.389	15.3007	15.4403	14.6989	14.7562	14.4626	14.4192	M0ZI01	Glycosyltransferase
15.2478	14.9527	15.3136	15.1967	15.6787	15.2988	15.3404	15.639	15.3315	14.7743	15.0116	15.0536	15.5019	15.452	15.5611	15.4727	M0ZI06	Uncharacterized protein
13.3714	13.2749	13.2232	13.3131	13.9691	13.5972	13.484	13.513	15.0659	15.0671	15.0668	15.1351	14.8945	14.7879	14.8771	14.8167	M0ZI18	Heat shock cognate 70 kDa protein
15.618	15.5477	15.7306	15.7516	16.4099	16.3042	16.2143	16.1221	15.811	15.7243	15.7348	15.667	15.939	15.7584	15.8303	15.9099	M0ZI24	Carboxypeptidase
18.5003	18.5237	18.401	18.4089	18.0694	18.1266	18.0953	18.0568	18.2243	18.2906	18.2783	18.2443	18.0638	18.0009	18.0301	17.9897	M0ZI35	50S ribosomal protein L9, chloroplastic
15.934	15.8825	15.981	15.9335	16.0524	15.9211	15.9963	15.9415	15.7587	15.7522	15.71	15.6674	16.0438	16.0245	16.0973	16.1104	M0ZI36	Lethal leaf spot 1
14.4122	14.6448	14.5831	14.4618	14.246	14.6412	14.4439	14.2138	15.4806	15.5294	15.4571	15.4821	15.6657	15.4942	15.6017	15.5153	M0ZI43	Magnesium transporter
15.4837	15.5364	15.53	15.5763	15.5856	15.7309	15.6267	15.6887	15.6474	15.6756	15.6535	15.6598	15.7275	15.7655	15.7539	15.6404	M0ZI69	Isocitrate dehydrogenase [NADP]
16.1298	16.0703	16.0395	16.0795	16.0154	15.9875	15.9661	16.0199	15.9521	15.7944	15.898	15.9079	15.8958	15.9154	15.85	15.9596	M0ZI78	Monodehydroascorbate reductase
18.2163	18.1621	18.1295	18.1094	17.516	17.6634	17.7457	17.8161	17.2588	17.6809	17.3846	17.6348	17.1471	17.2608	17.3805	17.4183	M0ZI81	50S ribosomal protein L12, chloroplastic
18.7682	18.859	18.7464	18.6623	17.9822	18.2034	18.2792	18.1938	17.7058	18.2901	17.7817	18.0541	17.6988	17.739	17.9637	17.9561	M0ZI82	50S ribosomal protein L12, chloroplastic
17.5473	17.5971	17.648	17.6259	17.7904	17.8221	17.8054	17.7694	17.5524	17.6061	17.5423	17.5869	17.8073	17.81	17.8025	17.8339	M0ZI96	Serine-type peptidase
15.4772	15.5242	15.5757	15.5229	16.1942	15.9992	16.0318	16.0349	16.1953	16.138	16.1558	16.2286	16.441	16.4253	16.3712	16.4147	M0ZI98	Formate dehydrogenase, mitochondrial;Formate dehydrogenase, mitochondrial
18.463	18.4881	18.4044	18.475	18.1455	18.1404	18.1974	17.9903	17.963	18.2633	17.9674	18.1088	18.053	17.8422	17.9188	17.9878	M0ZIB8	Metal ion binding protein
16.3256	16.2883	16.198	16.1787	15.8588	15.9287	15.6243	15.6427	16.1774	16.2442	16.0938	16.2904	16.0118	15.7399	15.9547	16.0098	M0ZIC3	Peroxidase
16.5955	16.6298	16.4422	16.5711	16.5044	16.5468	16.4856	16.439	16.2284	16.4458	16.3931	16.3503	16.4377	16.4684	16.5224	16.5583	M0ZID9	Peptide deformylase
16.866	16.7745	16.8056	16.7858	16.4182	16.4684	16.5119	16.5584	16.6475	16.7133	16.7417	16.8171	16.5233	16.5629	16.5644	16.5593	M0ZIF6	Calcium homeostasis regulator CHoR1
18.0354	18.1242	18.1017	18.0439	18.2004	18.1718	18.1829	18.1455	18.0343	18.1354	17.9907	17.9609	18.2351	18.2849	18.3148	18.2836	M0ZIF8	Peptidylprolyl isomerase
15.3467	15.3564	15.422	15.4817	15.4629	15.173	15.2	15.5232	15.5201	15.3468	15.3997	15.4071	15.3265	15.2278	15.3276	15.3819	M0ZII9	Uncharacterized protein
15.7057	15.9769	15.4748	15.5706	15.6713	15.6859	15.6974	15.5851	16.0363	16.1793	16.1173	16.126	16.0706	16.0504	16.0167	16.0394	M0ZIL7	Catechol O-methyltransferase
15.2745	15.2107	15.1319	14.9404	15.2572	15.4998	15.323	15.3365	15.6291	15.425	15.4463	15.5117	15.2726	15.6173	15.6013	15.4662	M0ZIL9	Uncharacterized protein
14.1775	14.173	14.2785	14.1584	14.4366	14.3308	14.289	14.3107	14.9453	14.9338	14.8796	14.9381	15.3501	15.3298	15.3254	15.3067	M0ZIM5	Sugar transporter
15.0859	15.1024	14.9306	15.0227	15.2303	15.1339	15.1863	15.1384	15.1267	15.0565	14.9727	15.197	15.2081	15.2779	15.1258	15.15	M0ZIM7	NADH dehydrogenase [ubiquinone] 1 alpha subcomplex subunit 12
18.3292	18.2778	18.2449	18.2998	17.9588	17.9428	18.0923	18.0265	18.0277	18.1289	18.115	18.1259	17.9331	18.1018	17.8923	17.88	M0ZIN1	Electron transporter
17.4227	17.4218	17.4078	17.3812	17.3066	17.3589	17.2959	17.2657	17.2001	17.1858	17.2056	17.2344	17.1499	17.2632	17.1699	17.1653	M0ZIN8	Protein translocase
14.6191	14.6786	14.715	14.661	14.8595	14.8263	14.7204	14.8719	14.809	14.8667	14.8938	14.9496	14.8528	14.8915	14.908	14.915	M0ZIP5	Band 7 family protein
17.0001	16.9304	16.8083	16.8615	16.4831	16.4555	16.474	16.4927	16.45	16.4531	16.5016	16.5278	16.158	16.2227	16.201	16.1499	M0ZIP7	Nascent polypeptide associated complex alpha subunit
14.2074	14.2915	14.4035	14.5164	14.6024	14.5748	14.5682	14.5645	15.1352	15.0993	15.0968	15.1222	15.4562	15.5301	15.4354	15.5243	M0ZIV1	Nucleic acid binding protein
16.0853	16.2241	16.2147	16.1555	16.4582	16.453	16.4898	16.4845	16.5371	16.4635	16.4968	16.547	16.6844	16.7163	16.613	16.66	M0ZJ08	Agmatine deiminase
16.3682	16.3746	16.4452	16.3665	16.6143	16.4857	16.5766	16.6783	16.2648	16.3355	16.1933	16.245	16.1553	16.2534	16.1893	16.1064	M0ZJ17	Protein disulfide-isomerase
15.1034	15.0083	15.0481	15.144	15.0455	15.2598	15.0469	15.023	15.1733	14.9938	15.1648	15.3333	15.0599	15.248	15.1239	15.136	M0ZJ30	Nitrate transporter NRT1.1
15.2359	15.0159	15.0664	15.1673	14.8825	16.2945	15.556	14.7469	15.0574	14.5619	14.8802	15.1199	14.9241	15.0279	14.8321	14.7469	M0ZJ54	Cleavage and polyadenylation specificity factor subunit 3-I
15.4209	15.2346	15.3676	15.3233	15.5032	15.3908	15.4391	15.4601	15.582	15.4283	15.5182	15.5709	15.412	15.4806	15.3972	15.3382	M0ZJ77	Coatomer subunit gamma
17.2617	17.427	17.2992	17.276	17.2319	17.2247	17.2276	17.161	17.1673	17.4412	17.1791	17.1452	17.1938	16.9904	17.3052	17.1656	M0ZJ84	Glycine-rich RNA binding protein
15.8811	15.8422	15.832	15.924	15.8947	15.8964	15.7868	15.8919	15.9275	15.6516	15.8968	15.8775	15.8343	15.5515	15.7173	15.7171	M0ZJC8	Protein RER1
14.1018	14.1534	14.1525	14.3964	15.2885	14.9946	15.2009	15.2677	13.4595	13.3114	13.4371	13.2971	12.9199	13.1093	12.9063	11.7777	M0ZJC9	Glucose-1-phosphate adenylyltransferase;Glucose-1-phosphate adenylyltransferase large subunit 1 (Fragment)
16.7129	16.6694	16.6906	16.706	16.4893	16.5827	16.6359	16.5131	16.6373	16.6804	16.689	16.8048	16.5465	16.6351	16.4901	16.4893	M0ZJD3	Diaminopimelate decarboxylase 1, chloroplastic
13.516	13.5213	13.54	13.4917	13.4858	13.2654	13.4318	13.3841	13.5754	13.456	13.6081	13.5607	13.5373	13.5711	13.4218	13.484	M0ZJK5	Mitochondrial carrier protein
15.6067	15.5597	15.4922	15.5197	15.6335	15.5061	15.5325	15.6222	15.3479	15.4429	15.3051	15.3733	15.4434	15.4535	15.4195	15.4863	M0ZJL8	Uncharacterized protein
15.4836	15.4727	15.468	15.4573	15.5811	15.58	15.5542	15.5933	15.6168	15.654	15.6606	15.6917	15.7878	15.7746	15.7417	15.7315	M0ZJM5	CHUP1 (CHLOROPLAST UNUSUAL POSITIONING 1)
17.6887	17.681	17.7459	17.6334	17.3554	17.426	17.3287	17.3287	17.5635	17.4777	17.6344	17.5562	17.2993	17.2134	17.2794	17.3346	M0ZJN7	Methionine aminopeptidase
14.5338	14.4922	14.8137	14.3398	14.1282	14.4925	14.276	14.1942	14.5322	14.8035	14.5794	14.5811	14.8015	14.6383	14.5939	14.8823	M0ZJQ4	ATP binding protein
16.3355	16.5335	16.3567	16.4152	16.6846	16.4867	16.1802	16.6152	16.5663	16.3949	16.5457	16.5282	16.8262	16.7755	16.7972	16.8955	M0ZJR3	GDT1 family protein
15.9857	15.9474	16.0591	16.0015	16.4979	16.315	16.3528	16.4442	16.2981	16.2165	16.2534	16.2329	16.4625	16.5253	16.4682	16.4869	M0ZJT7	Hydroxyproline-rich glycoprotein family protein
15.2173	15.2777	15.3072	15.1659	15.1713	15.2666	15.2167	15.2488	15.852	15.71	15.7845	15.7913	15.7765	15.8159	15.7559	15.8379	M0ZJU5	AMP-activated protein kinase, gamma regulatory subunit
18.3115	18.3097	18.0528	18.2461	17.9791	17.9554	17.8971	17.6899	17.8514	17.8472	17.8314	17.8365	17.8243	17.799	17.4226	17.6699	M0ZJV9	bPH_2 domain-containing protein
15.5932	15.4845	15.5527	15.5142	15.3821	15.3564	15.3488	15.3699	15.4844	15.415	15.4729	15.5586	15.4966	15.4593	15.4728	15.4315	M0ZJY6	4-coumarate--CoA ligase
16.907	17.0045	17.0131	16.9625	17.1432	17.1714	17.1602	17.151	16.9691	17.064	16.9505	16.9575	17.2042	17.2165	17.195	17.1913	M0ZJY9	Thylakoid-bound ascorbate peroxidase 6
13.7612	13.4636	13.4471	13.3965	13.1673	13.0214	13.199	13.1969	13.2709	13.1778	13.1169	13.2234	13.2449	12.9064	12.9226	12.9826	M0ZJZ8	LysM domain GPI-anchored protein 1
15.0735	14.9072	14.9414	14.9432	15.1547	14.9438	15.0126	15.1619	14.4547	14.7104	14.4882	14.5786	14.3072	14.5586	14.2824	14.4153	M0ZK27	Glutaredoxin-like protein
16.335	16.2132	16.2483	16.3219	16.4997	16.2948	16.4024	16.4918	16.126	16.0225	16.0778	16.035	16.0212	16.0818	15.9951	16.0543	M0ZK51	Phosphoglycerate mutase (2,3-diphosphoglycerate-independent)
13.8959	14.1508	14.115	14.1568	14.3453	14.3466	14.3379	14.5161	14.3115	14.1526	14.3081	14.2401	14.2584	14.4167	14.1654	14.2868	M0ZK80	Isoamylase isoform 2
16.2511	16.3307	16.2684	16.275	16.43	16.4108	16.1993	16.2467	16.2803	15.792	16.1952	16.0815	16.3127	15.9391	16.1242	16.244	M0ZKA4	Binding protein
15.1596	15.2921	15.2189	15.1861	15.0029	15.076	15.0325	14.9407	15.2384	15.1891	15.2748	15.2756	15.248	15.2336	15.2145	15.2415	M0ZKA6	Aspartate carbamoyltransferase
14.5235	14.4447	14.3363	14.4437	14.5508	14.4434	14.5427	14.3477	13.8491	14.1849	14.4022	14.1342	14.0559	14.1893	14.0771	14.0136	M0ZKB9	Pentatricopeptide repeat-containing protein
15.2803	15.1894	15.2877	15.1695	15.1377	15.1365	15.1939	15.207	15.245	15.0684	15.1631	15.2233	15.2353	15.2102	15.3192	15.2286	M0ZKC3	AIR carboxylase
17.7149	17.7438	17.7441	17.7081	17.5372	17.657	17.751	17.6179	17.5498	17.6645	17.5238	17.574	17.4746	17.4654	17.4835	17.3574	M0ZKF0	H(+)-transporting two-sector ATPase
15.5306	15.4379	15.4672	15.5765	15.3126	15.2618	15.3427	15.3616	16.0447	15.9564	16.0313	16.0511	16.1293	16.1868	16.0475	16.1247	M0ZKJ3	Soul heme-binding family protein
17.3633	17.2919	17.2786	17.2679	17.2093	17.2165	17.079	17.1443	17.2509	17.2344	17.2353	17.246	17.2142	17.2507	17.2385	17.1832	M0ZKM5	Fatty acid hydroperoxide lyase
16.5048	16.6311	16.678	16.6083	16.8979	17.0246	16.9549	16.9878	16.7646	16.7728	16.7146	16.852	16.9826	17.1264	17.0892	16.8848	M0ZKQ8	Chloroplast lipocalin
15.8452	15.8408	15.9416	15.883	16.2686	16.167	16.179	16.2461	15.7743	15.832	15.8567	15.8683	15.9097	16.058	15.939	15.9991	M0ZKQ9	Electron transfer flavoprotein subunit alpha
15.6882	15.818	15.7518	15.774	16.1175	16.0797	16.02	15.9971	16.0121	15.8804	15.9924	16.0056	15.8536	15.9195	15.8904	15.8795	M0ZKR0	DEAD-box ATP-dependent RNA helicase 37
15.3829	15.3031	15.3973	15.2942	14.9764	14.8344	15.0138	14.9956	14.666	14.9007	14.6475	14.9422	14.6332	14.5582	14.8278	14.8612	M0ZKR5	Uncharacterized protein
16.6443	16.5905	16.4579	16.4733	16.2461	16.2838	16.1657	16.2152	16.3493	16.3814	16.4008	16.375	16.0733	16.1723	16.1982	16.1209	M0ZKS8	Protoporphyrinogen oxidase
13.7808	14.0282	13.8384	13.943	13.9123	14.0097	14.0541	13.8399	14.2338	14.488	14.3519	14.2515	14.367	14.3718	14.1411	14.3581	M0ZKT6	Cysteine desulfurylase
16.305	16.2672	16.243	16.3015	16.0476	16.141	16.1299	16.1209	16.411	16.3286	16.4063	16.3758	16.2742	16.3307	16.2524	16.2591	M0ZKT9	Chloroplast protein-transporting ATPase
15.2956	15.0473	15.2186	15.1326	14.8261	14.9716	14.7576	14.7413	15.5777	15.5513	15.5527	15.9884	15.6354	15.2474	15.2646	15.2965	M0ZKU5	Histone H1F
14.7262	14.7369	14.514	14.4508	14.6762	14.8332	14.4686	14.576	14.5928	14.1893	14.2423	14.2048	14.0551	14.1134	14.0863	14.1026	M0ZKV6	Clathrin coat assembly protein ap-1
18.9554	18.9512	18.8753	18.9345	18.6973	18.6993	18.7234	18.6952	18.7919	18.8182	18.8334	18.814	18.7116	18.6826	18.6997	18.721	M0ZKX1	RuBisCO large subunit-binding protein subunit alpha, chloroplastic
16.5883	16.4887	16.48	16.4993	16.8523	16.7381	16.6066	16.6646	16.1861	16.0192	16.1605	16.2005	16.4016	16.5115	16.439	16.5197	M0ZKX2	Allene oxide synthase 2
15.6607	15.5645	15.5472	15.6499	15.6442	15.5762	15.5889	15.6013	15.0536	15.0585	14.8648	15.113	15.1544	15.0827	15.2114	15.0695	M0ZL17	Nucleolin
16.0194	16.047	16.0332	15.8699	16.6635	16.4842	16.4277	16.5976	16.1957	16.1691	16.2036	16.1153	16.3641	16.4704	16.4426	16.4632	M0ZL28	Peroxisomal enoyl-CoA hydratase/isomerase family protein
18.1894	18.1876	18.147	18.1562	17.8271	17.8106	17.8985	17.8235	18.0047	18.0226	18.0379	18.0434	17.8611	17.811	17.8342	17.7935	M0ZL57	30S ribosomal protein S1, chloroplastic
16.156	16.2671	16.2218	16.2053	15.7921	15.9598	15.7495	15.6734	15.8968	15.9787	15.9298	16.0823	15.8807	15.6607	15.7645	15.6538	M0ZL78	Leucine-rich repeat protein
15.4919	15.362	15.312	15.44	15.3323	15.2932	15.2383	15.1811	15.6878	15.465	15.6076	15.6821	15.6899	15.5849	15.508	15.6698	M0ZL80	Anion:sodium symporter
16.0291	16.0065	16.0325	16.0127	16.2927	16.2209	16.1892	16.2025	16.0794	15.9967	16.017	16.0444	15.9627	15.8897	15.9664	15.9441	M0ZLC3	Protein transport SEC13
15.7011	15.7286	15.5225	15.5855	15.2067	15.4319	15.4074	15.3118	15.2991	15.655	15.5141	15.3954	15.1561	15.284	15.3877	15.4903	M0ZLC9	Ankyrin repeat domain protein
12.8259	12.0648	12.884	12.9362	12.5526	11.5084	12.9731	13.0251	13.475	13.216	13.5434	13.6392	13.0509	13.4144	13.1306	13.5907	M0ZLE4	Inositol hexakisphosphate and diphosphoinositol-pentakisphosphate kinase
14.9104	14.7185	14.7724	14.8721	14.8415	15.0624	14.5017	14.853	14.3946	14.3759	13.9122	14.3252	14.0937	14.104	14.3207	13.6952	M0ZLG1	Aldose 1-epimerase
15.4546	15.5443	15.4357	15.4889	15.6978	15.7839	15.7843	15.6896	15.1955	15.379	15.301	15.2272	15.203	14.9902	15.3316	15.2439	M0ZLM0	Mitochondrial saccharopine dehydrogenase
16.3379	16.3798	16.372	16.3486	16.4235	16.4051	16.4188	16.4237	15.8625	15.8981	15.8484	15.9033	15.9976	15.8876	15.899	15.9154	M0ZLN7	Mitochondrial processing peptidase
14.7893	14.6915	14.7605	14.8305	14.9832	14.9032	14.8046	14.9566	14.8319	14.8267	14.885	14.9019	14.7858	14.8866	14.7454	14.8302	M0ZLQ0	Eukaryotic translation initiation factor 3 subunit M
13.2449	12.2867	13.0198	13.2816	13.0828	11.7055	12.686	13.1511	14.0405	14.0641	14.3316	14.418	13.6555	14.2143	13.6169	13.158	M0ZLQ3	FERONIA receptor-like kinase
17.1249	17.2391	17.1108	16.9803	16.4053	16.3613	16.2512	16.4692	16.6539	16.3324	16.4929	16.5215	16.1178	16.0344	12.7617	15.8409	M0ZLU9	Protein CREG1
16.7408	16.8261	16.7134	16.6444	16.9647	16.8633	16.8688	16.9592	16.4809	16.4519	16.3729	16.3222	16.4053	16.3063	16.142	16.3322	M0ZLX3	Thioredoxin H
14.4203	14.3372	14.4291	14.442	14.6184	14.5444	14.6445	14.7227	14.8964	15.1313	14.9479	14.9501	14.8705	15.1371	14.8788	14.9113	M0ZM13	Pro-resilin
16.8337	16.9475	16.7867	16.8103	16.6118	16.6753	16.6972	16.6762	16.5587	16.5301	16.55	16.4922	16.4476	16.3439	16.5218	16.4554	M0ZM21	DUF3598 domain-containing protein
15.7969	15.3779	15.7195	15.6625	15.427	15.2822	15.4067	15.5336	14.7423	14.5623	14.6911	14.6094	14.3471	14.4891	14.3832	14.3623	M0ZM23	Blue (Type 1) copper domain
11.8655	12.3921	12.1467	12.5317	13.3662	12.0471	11.4186	13.2378	12.0317	11.0207	11.8867	10.9957	10.7597	12.1651	12.1349	11.7484	M0ZM28	Ubiquitin-protein ligase
15.9352	15.9204	15.9439	15.9458	15.7581	15.8024	15.7999	15.7873	15.4937	15.4722	15.5421	15.4939	15.2525	15.2967	15.1762	15.2321	M0ZM32	Heat shock protein
15.0986	14.7909	15.041	14.951	15.1271	14.9734	14.1194	13.4053	14.8682	14.8102	14.8869	14.8216	14.8309	14.8005	10.8199	14.4124	M0ZM56	RNA-binding protein
16.0648	16.1104	15.9772	15.9985	16.7141	16.5257	16.5629	16.4985	14.2978	14.495	14.1447	14.1163	14.333	14.3614	14.4798	14.3632	M0ZMA9	PR10
17.3224	17.4062	17.1266	17.2033	16.43	16.6185	16.5925	16.565	16.8324	16.8189	16.9158	16.8553	16.6308	16.3772	16.5583	16.5651	M0ZMB0	Ribonucleoprotein, chloroplast
13.6665	13.6576	13.2777	12.9969	12.9895	13.0266	12.8593	12.8845	12.7994	11.5962	12.7113	12.8228	12.3671	12.6349	12.4771	11.4231	M0ZMB2	Ras-GTPase-activating protein-binding protein
14.9197	14.9107	14.9949	14.9454	15.086	14.8842	15.0688	15.0166	14.7571	14.4312	14.6573	14.7339	14.8639	14.827	14.8624	14.88	M0ZMC5	Ammonium transporter
16.8397	16.897	16.7951	16.7735	16.2959	16.2599	16.2717	16.3092	16.2379	16.1045	16.2361	16.2924	16.0226	15.9101	15.9088	15.9608	M0ZMF8	Phosphoserine aminotransferase
15.6089	15.6387	15.6457	15.6294	16.7432	16.5512	16.5447	16.5668	14.504	14.3786	14.34	14.3784	14.1014	14.208	14.376	14.0432	M0ZMG2	Class II chitinase
14.3264	14.3965	14.3902	14.4451	14.4129	14.6526	14.282	14.6526	14.3051	14.2638	14.2465	14.3562	14.5788	14.6603	14.691	14.7078	M0ZMK2	Lipase class 3 family protein
14.3441	14.4514	14.4022	14.4426	14.3359	14.5899	14.5684	14.4615	13.8757	13.8268	13.8562	14.1414	13.7122	14.2286	14.4726	14.4004	M0ZML1	O-linked n-acetylglucosamine transferase, ogt
14.8189	14.6096	14.6536	14.721	14.418	14.2767	14.576	14.6647	14.1275	13.476	13.7323	13.8459	13.6	13.5553	13.7773	13.6995	M0ZMM1	Glutamyl-tRNA(Gln) amidotransferase subunit B, chloroplastic/mitochondrial
17.002	16.9685	16.8082	17.0021	16.6988	16.8069	16.9213	16.6043	16.3171	16.3978	16.4706	16.3855	16.1533	16.2941	15.9539	16.0298	M0ZMM2	Aspartyl/glutamyl-tRNA(Asn/Gln) amidotransferase subunit B
13.0705	13.4459	12.9575	13.0464	13.1557	13.2454	12.6807	13.0035	13.5574	13.8353	14.0205	14.2034	14.1662	14.4138	13.8404	13.577	M0ZMN4	High mobility group protein
17.2538	17.1857	17.3433	17.3407	17.4441	17.3284	17.4825	17.5401	18.1087	17.9792	18.0722	18.0606	18.2028	18.3841	18.2163	18.2054	M0ZMN7	Catalase
14.9251	14.8326	14.969	14.9921	15.1144	14.8258	15.1357	15.1841	14.6245	14.7627	14.5522	14.7523	14.6722	14.9307	14.931	14.8013	M0ZMN8	Plant ubiquilin
15.0119	15.1034	15.2008	15.067	15.8559	15.6695	15.5938	15.7217	15.2573	15.3427	15.2504	15.2059	15.5021	15.5757	15.5192	15.5573	M0ZMP4	Str_synth domain-containing protein
15.8381	15.9372	15.9445	15.8549	15.9515	16.0632	15.9877	16.0675	16.0987	16.1087	16.1194	16.2036	16.1363	16.1884	16.204	16.175	M0ZMR2	Anti-PCD protein
16.3148	16.2931	16.2493	15.9797	16.1594	16.0787	16.0171	16.112	15.8598	16.1117	16.13	15.7442	16.1016	16.217	16.0455	16.2105	M0ZMR8	Glycine-rich protein 2
17.2028	17.1846	17.1423	17.1194	17.4324	17.4786	17.4604	17.5038	16.3016	16.72	16.378	16.5741	16.5666	16.8851	16.6363	16.7414	M0ZMR9	Glycine-rich protein 2
12.6355	12.1717	12.3398	12.6899	12.9229	12.1015	12.6479	12.9288	12.7788	12.7812	13.0011	13.0927	12.8242	13.0865	12.7287	13.0314	M0ZMS2	Protein translocase
18.6535	18.6535	18.6182	18.5874	18.4582	18.4155	18.511	18.4785	18.5055	18.5632	18.4888	18.4555	18.4194	18.4021	18.4809	18.4579	M0ZMS6	Triosephosphate isomerase, chloroplastic
16.455	16.4569	16.3789	16.346	16.177	16.1702	16.2583	16.241	16.0665	16.1668	16.1861	16.1442	15.7639	15.9502	15.8581	15.8619	M0ZMV9	Ribosome-binding factor A
16.9468	17.0045	17.0049	16.9957	17.1111	17.1521	17.1536	17.1775	16.8063	16.7954	16.7654	16.6709	16.7186	16.6682	16.7344	16.5701	M0ZMW1	Amidophosphoribosyltransferase
16.0058	16.0793	16.0873	15.9767	16.1839	16.1418	16.1507	16.1296	15.6759	15.7494	15.5278	15.6543	15.7013	15.7907	15.7473	15.7823	M0ZMY2	Mta/sah nucleosidase
14.2922	14.1978	14.2786	14.2776	14.4073	14.4599	14.4562	14.4917	13.7439	14.0892	13.8449	13.9959	13.9418	14.03	14.0406	14.0256	M0ZMY4	39 kDa EF-Hand containing protein
14.2324	14.2415	14.1352	14.215	14.0575	13.8704	13.9717	14.0697	13.8617	14.204	14.1336	14.0933	13.8705	13.7894	13.7757	13.8245	M0ZMZ6	Ubiquitin-protein ligase BRE1A
14.8278	14.5731	15.7022	15.1219	14.9946	15.4977	15.0042	15.6026	15.0476	14.4531	15.0299	15.6475	13.9414	15.3727	14.2347	13.1367	M0ZN04	ATP synthase subunit e, mitochondrial
17.0052	16.8761	16.9128	16.9058	17.0145	17.0113	16.9171	16.9032	16.8817	16.7584	16.847	16.8174	16.8131	16.8347	16.8304	16.788	M0ZN11	Aldo-keto reductase
15.705	15.6235	15.6216	15.6952	15.829	15.8171	15.7564	15.7651	15.7408	15.6146	15.6766	15.7012	15.7602	15.7437	15.7035	15.7461	M0ZN23	Eukaryotic translation initiation factor 3 subunit B
15.847	15.9585	15.9263	15.929	15.7251	15.9066	15.8041	15.8629	16.035	16.0475	16.0584	16.1132	16.1199	16.0549	16.0611	16.02	M0ZN42	PDE320
14.5606	14.6703	14.6032	14.5013	14.7199	15.0528	14.6754	14.6814	15.2549	15.3167	15.2859	15.1464	15.1489	15.2136	15.1912	15.1028	M0ZN55	RNA binding protein
14.9762	14.9762	14.903	14.9324	15.1534	15.1216	15.0262	15.1464	15.0729	15.0622	15.1337	15.0255	15.0214	14.909	15.0824	15.0561	M0ZN84	Dynamin
16.1882	16.1423	16.0078	16.1235	16.2375	16.1963	16.1317	16.091	15.9347	15.8974	15.9068	15.8752	15.9827	15.9393	15.8799	15.8419	M0ZN87	Nt-rab6 protein
17.9777	17.7909	17.8307	17.9259	17.7485	17.7173	17.7563	17.6817	17.729	17.7761	17.7191	17.8439	17.8203	17.7031	17.7412	17.7604	M0ZN89	ATP binding protein
12.2702	11.9564	12.0275	12.1464	12.3778	12.089	11.8294	12.0683	11.8195	12.1985	12.0348	11.6344	11.5667	11.6268	11.7524	11.8435	M0ZN99	Eukaryotic translation initiation factor 4g
16.0199	16.0698	16.0876	16.0688	16.1064	16.1084	16.1528	16.2109	16.1135	16.0921	16.0411	16.1139	16.2968	16.3501	16.3496	16.3865	M0ZNB1	Uncharacterized protein
17.0097	16.973	16.9476	16.9466	16.4253	16.3998	16.4234	16.5237	16.5654	16.4171	16.5874	16.5586	16.2629	16.3124	16.3341	16.1869	M0ZND0	50S ribosomal protein L5, chloroplastic
14.4703	14.4319	14.6901	14.4601	14.6182	14.4124	14.4214	14.6528	14.8083	14.6364	14.9017	14.9889	14.6381	14.6425	14.5304	14.6231	M0ZNK2	Enoyl-CoA-hydratase
16.1238	16.0697	16.0622	16.1549	16.1115	16.0639	15.9241	16.1494	15.9893	16.0271	15.9335	15.882	15.8493	15.9405	15.883	15.8924	M0ZNK9	SAICAR synthetase
14.7397	14.8146	14.7822	14.7132	15.6154	15.3501	15.3915	15.5434	15.6964	15.5266	15.6404	15.5977	15.9912	15.9575	16.0974	15.9722	M0ZNL5	Glutathione s-transferase
14.6975	14.6769	14.6757	14.6406	14.6701	14.649	14.538	14.5659	15.0093	14.8391	15.0088	14.9433	14.9163	14.9194	14.9363	14.8311	M0ZNR5	Lon protease homolog 2, peroxisomal
15.255	15.265	15.3018	15.265	15.4047	15.4203	15.4105	15.3897	14.9545	14.8042	14.9588	15.0152	15.1019	15.1051	15.017	15.0014	M0ZP01	Phosphoglucomutase
14.5237	14.4787	14.6158	14.411	14.329	14.4045	14.6826	14.6934	14.5164	14.3082	14.4134	14.4718	14.546	14.619	14.5138	14.6031	M0ZP30	Pyruvate dehydrogenase E1 component subunit alpha
16.3892	16.4788	16.3993	16.2066	16.1539	15.6312	15.7903	15.7731	16.0568	15.9891	15.9367	15.9537	15.6627	15.6858	15.9082	15.9381	M0ZP31	Uncharacterized protein
16.3659	16.5058	16.4422	16.3107	16.9948	16.7567	16.6065	16.5538	15.3324	15.7295	15.7856	15.1765	15.3917	15.2617	15.0956	15.5145	M0ZP38	6-phosphogluconate dehydrogenase, decarboxylating
16.422	16.4515	16.1018	16.1052	16.5871	16.5324	15.9512	16.3247	15.696	15.9857	15.86	15.9833	15.3271	15.9063	15.5447	15.7569	M0ZP52	Peptidyl-prolyl cis-trans isomerase E
16.5993	16.7161	16.7762	16.6889	17.0494	17.0492	17.0108	17.1548	16.9181	16.9027	16.8652	16.7985	16.7663	16.7241	16.7786	16.692	M0ZPA4	Carotenoid cleavage dioxygenase 4
14.5724	14.7583	14.6845	14.6499	15.2696	15.1859	15.1482	15.1394	15.4969	15.3747	15.3611	15.318	15.9098	15.9259	15.8791	15.9646	M0ZPB6	Uricase
15.6826	15.6477	15.6398	15.6143	15.9861	15.9114	16.0121	15.9855	15.7912	15.9253	15.8237	15.7915	15.9273	15.8538	15.7939	15.8236	M0ZPC7	DnaJ
14.0583	14.3549	14.2209	14.2376	14.3829	14.5054	14.5036	14.4297	13.6173	14.0309	13.5825	12.6137	14.0591	12.737	13.8642	13.7469	M0ZPG5	Tho1_MOS11_C domain-containing protein
15.6675	15.6185	15.4626	15.5631	15.5027	15.4533	15.4767	15.5479	15.2843	15.5152	15.3105	15.4712	15.268	15.3373	15.2788	15.3502	M0ZPG9	Glutathione S-transferase omega
15.4674	15.5672	15.4941	15.3875	15.6731	15.7951	15.5201	15.6414	14.0337	14.5181	14.3116	13.5463	13.9403	14.1222	13.9402	14.2519	M0ZPH1	Amidase family protein
15.852	15.1047	15.3853	15.61	15.6165	15.4812	15.6823	15.7526	15.9792	15.9109	15.9859	15.8555	15.985	16.2281	15.9782	16.1717	M0ZPL6	Rhamnogalacturonan endolyase
18.1685	18.1881	18.2279	18.2478	18.2116	18.2831	18.391	18.3235	18.0606	18.1324	18.0704	18.1529	18.2214	18.2682	18.1583	18.1836	M0ZPM9	34 kDa outer mitochondrial membrane protein porin
19.302	19.3024	19.3192	19.3376	19.3821	19.3019	19.5027	19.4127	19.0599	19.2199	19.0873	19.0891	19.211	19.2531	19.2722	19.3306	M0ZPT4	Glycine cleavage system H protein
15.2968	15.4834	15.3631	15.2944	15.0926	15.2905	15.2098	15.3232	15.1274	15.1859	15.1349	15.067	15.0237	15.0438	15.0076	15.154	M0ZPT5	TLDc domain-containing protein
15.0988	15.1336	14.9234	14.9659	15.073	15.1555	14.9925	14.9292	14.5457	14.5497	14.5849	14.6073	14.5288	14.156	14.3797	14.7054	M0ZPV5	40S ribosomal protein S21
18.3434	18.3476	18.3472	18.3296	18.2628	18.2986	18.3165	18.265	18.1787	18.3524	18.185	18.1863	18.1896	18.2537	18.2364	18.1898	M0ZPZ4	PTAC16
15.9076	16.1107	16.0835	15.9326	16.6217	16.3873	16.54	16.536	14.6706	14.8873	14.577	14.6709	15.2049	15.1616	15.0091	15.1813	M0ZQ21	Glutathion S-transferase;Probable glutathione S-transferase
14.7885	14.7253	14.9835	14.8409	16.4255	16.0883	16.2141	16.2294	15.0759	14.2095	14.9637	15.131	15.7745	15.9891	15.8339	15.8269	M0ZQ25	Glutathione-S-transferase
16.6317	16.6525	16.5868	16.6415	16.572	16.5551	16.5317	16.5163	16.8238	16.8188	16.8541	16.8501	16.8703	16.8275	16.8384	16.8753	M0ZQ61	Serine hydroxymethyltransferase
15.1729	15.2348	15.1224	15.1332	15.1921	15.274	15.2658	15.1097	15.4586	15.6709	15.5367	15.5855	15.6969	15.6196	15.6323	15.6083	M0ZQ75	F17H15.1/F17H15.1
18.0932	17.8446	18.0211	17.8813	17.8983	17.7691	17.9727	17.6917	17.7258	18.0387	17.8176	17.9222	17.7385	17.7073	17.6499	17.6974	M0ZQH0	Ly200;Ly200 protein;Ly200
14.4197	14.3537	14.5075	14.331	14.3583	14.3586	14.1234	14.2372	15.4424	15.3957	15.38	15.5056	15.7637	15.7267	15.7204	15.707	M0ZQJ1	Early-responsive to dehydration 4
18.399	18.4325	18.3964	18.3679	18.245	18.2054	18.2145	18.2083	18.1549	18.1756	18.1197	18.1365	18.0522	18.028	18.0552	18.0677	M0ZQN1	Plastid high chlorophyll fluorescence 136
15.3047	15.4359	15.4092	15.3369	15.7841	15.7435	15.7298	15.7531	16.1317	16.0543	16.0861	16.0553	16.1995	16.1563	16.2411	16.2635	M0ZQP4	Aldo/keto reductase 2
14.6678	14.9224	14.7566	14.7136	14.2212	14.7704	14.6012	14.5	13.7355	14.114	13.9529	14.1792	13.921	13.9443	14.0007	14.1392	M0ZQV9	Caffeoyl-CoA O-methyltransferase
18.065	17.9822	17.9332	17.9503	17.5854	17.5668	17.5885	17.6114	17.7316	17.6575	17.7222	17.7353	17.4923	17.5046	17.5034	17.4509	M0ZQW3	Chaperonin 21
17.0173	16.9901	17.0963	17.0547	17.3595	17.3164	17.3178	17.3002	16.7033	16.6343	16.7192	16.7143	17.109	17.2141	17.1099	17.1006	M0ZQY1	Gamma-tocopherol methyltransferase
16.7826	16.5288	16.6702	16.6722	16.6644	16.6967	16.4881	16.6046	17.1069	17.0868	17.2138	17.1958	17.0385	17.029	17.0411	17.0687	M0ZQY7	60S ribosomal protein L10
14.3492	14.2451	14.2172	14.1521	14.5392	14.4059	14.2208	14.5774	14.4242	14.2396	14.4278	14.3478	14.3772	14.4034	14.4336	14.5031	M0ZR67	Developmentally regulated GTP-binding protein
14.8131	14.755	14.7672	14.7307	14.849	14.7417	14.7578	14.7064	14.8857	14.8679	14.7933	14.8108	14.7979	14.745	14.9119	14.7634	M0ZR68	Phosphatidylcholine: Diacylglycerol Acyltransferase
16.0392	15.9955	15.9924	16.0592	15.8644	15.8699	15.8731	15.8881	15.9845	15.9923	16.0425	16.0072	15.7971	15.7923	15.7796	15.768	M0ZR79	Threonine synthase;Threonine synthase, chloroplastic
13.4202	13.2449	13.2732	13.1219	13.3809	13.3347	13.3505	12.9118	12.7342	12.804	12.9114	12.9095	12.3525	12.2652	12.6717	12.641	M0ZR81	Mitochondrial import inner membrane translocase subunit Tim17 family protein
15.434	15.2841	15.5065	15.4385	15.6248	15.574	15.5973	15.5239	15.1544	15.2756	15.1731	15.1154	15.336	15.2121	15.1662	15.2277	M0ZR91	Metallo-beta-lactamase family protein
14.2463	14.1433	14.4357	14.2909	14.2727	14.1214	14.1497	14.1869	14.5341	14.5023	14.5187	14.7578	14.7367	14.769	14.5912	14.6476	M0ZR98	WD-repeat protein
14.4038	14.7439	14.5964	14.2374	14.2899	14.3104	14.4373	14.6067	14.7146	14.4249	14.4158	14.4872	14.1791	14.2418	14.4161	14.338	M0ZRA0	Transmembrane 9 superfamily member
16.0336	16.0255	16.0776	15.9912	16.2594	16.2156	16.1614	16.2026	15.9666	15.9045	15.8445	15.8853	15.996	15.939	15.9546	15.9738	M0ZRE9	Phosphotransferase
17.6052	17.5805	17.5021	17.5391	17.2952	17.3089	17.3203	17.2464	17.3426	17.3992	17.4088	17.3588	17.213	17.1404	17.1661	17.2223	M0ZRG6	Rubisco subunit binding-protein beta subunit, rubb
17.5479	17.6317	17.5514	17.52	17.6768	17.6564	17.5596	17.5733	17.6151	17.4573	17.5627	17.5346	17.7172	17.6356	17.7003	17.6823	M0ZRH9	Small GTPase Rab2
20.6194	20.632	20.5356	20.5664	20.1794	20.2869	20.26	20.2207	20.4238	20.5115	20.4666	20.4429	20.3946	20.3342	20.2707	20.263	M0ZRJ1	30S ribosomal protein S17, chloroplastic
15.3478	15.2081	15.3043	15.2806	15.5463	15.4702	15.4291	15.553	15.4172	15.3158	15.4318	15.1921	15.339	15.5065	15.3731	15.358	M0ZRK0	Tha8
17.1471	17.128	17.1258	17.1785	17.0069	17.0522	17.0612	17.0403	17.3504	17.2556	17.3733	17.3909	17.2901	17.3372	17.2826	17.3351	M0ZRM5	D-glycerate 3-kinase, chloroplast
15.4173	15.5274	15.435	15.4148	15.2828	15.3936	15.3201	15.2091	15.209	15.3163	15.3219	15.2927	15.2374	15.0449	15.0961	15.101	M0ZRN4	MAR-binding filament 1
13.3927	12.5488	13.268	12.218	13.1696	12.4513	12.0599	13.1832	14.6533	14.1299	14.3909	14.9559	13.8863	13.8003	14.0326	14.0087	M0ZRR7	Cell wall invertase
15.1828	15.1919	15.1046	15.162	15.1541	15.353	15.1773	15.2147	15.2487	15.3463	15.3266	15.3249	15.3612	15.3531	15.2612	15.3931	M0ZRS0	Chaperonin-60kD, ch60
17.1223	17.0881	17.0349	17.0328	17.0344	17.0306	16.9399	17.0461	16.7343	16.6607	16.6625	16.6808	16.5236	16.5179	16.5763	16.5355	M0ZRT6	Ribosomal protein L28
18.1698	18.2737	18.1279	18.0946	18.2653	18.1303	18.2071	18.1483	17.9945	18.1403	17.9633	17.7831	18.0814	18.1627	18.0946	17.9349	M0ZRY3	Photosystem I psaH protein;PSI-H;PSI-H
13.799	13.6975	13.7061	13.819	13.8729	13.809	13.7328	13.9258	13.8866	13.8313	13.8196	13.7857	13.6204	13.901	13.7794	13.6616	M0ZS04	NMDA receptor-regulated protein
14.4908	14.6327	14.4983	14.4856	14.4208	14.5504	14.3878	14.4689	14.1723	14.2782	14.2952	14.3386	14.3162	14.1437	14.146	13.986	M0ZS08	Ran-binding protein
13.8502	13.6575	13.6125	13.6381	13.6718	13.6238	13.3563	13.6137	13.7428	13.7125	13.9177	13.6721	13.538	13.7112	13.5531	13.6965	M0ZS22	Esterase/lipase superfamily protein
15.2245	15.0573	15.0954	15.0085	15.1321	15.0843	15.1071	15.0716	15.3597	15.2642	15.4642	15.3462	15.6358	15.5919	15.526	15.6137	M0ZS24	Esterase/lipase superfamily protein
16.1535	16.0881	16.1252	16.1334	15.9908	15.9001	15.9645	15.9846	15.7236	15.7354	15.7615	15.7545	15.5464	15.5571	15.5551	15.5552	M0ZS26	FtsZ
16.7489	16.9432	16.8418	16.8173	16.7433	16.8228	16.8452	16.8819	16.5574	16.5124	16.4605	16.4554	16.3106	16.2869	16.4227	16.3132	M0ZS27	FtsZ
14.6984	14.7173	14.7642	14.7221	14.7867	14.8286	14.7732	14.8878	14.3108	14.2164	14.2799	14.2544	14.4999	14.4099	14.5289	14.6252	M0ZS65	Histone deacetylase HDT1
15.4353	15.4186	15.3326	15.3158	15.2418	15.2814	15.3453	15.3679	15.3241	15.4466	15.3596	15.3541	15.1953	15.1268	15.2533	15.3373	M0ZS71	Geranyl geranyl pyrophosphate synthase
17.7246	17.7916	17.7665	17.7677	18.0312	17.9796	17.9267	17.9472	17.7987	17.8116	17.7736	17.7453	17.9635	18.0106	17.9368	17.97	M0ZSA3	Monodehydroascorbate reductase
14.1305	14.1161	14.0316	13.991	14.3477	14.231	14.1677	14.3158	14.128	14.0181	13.7531	14.0393	14.1462	14.0872	14.1321	14.1274	M0ZSB3	ACI14
16.2831	16.508	16.4061	16.3368	16.3746	16.4382	16.2481	16.2461	14.9107	14.5058	14.8572	14.9757	14.9513	14.8168	14.7295	14.7724	M0ZSD5	Glutaredoxin-dependent peroxiredoxin
16.2259	16.2077	16.2181	16.2176	16.2105	16.155	16.292	16.3023	16.0389	16.1209	16.0202	16.0508	15.8069	15.8612	15.8594	15.6978	M0ZSD6	Phosphopyruvate hydratase
17.0816	16.8636	17.101	17.0729	16.8804	16.8837	16.8481	16.8645	16.8998	16.9778	16.9439	17.0497	16.7708	16.8814	16.6818	16.6224	M0ZSE8	Ribosomal protein L24;60S ribosomal protein L24;Ribosomal protein L24E
14.9381	14.6906	14.9556	14.8633	14.9791	14.759	14.8131	15.0113	14.5602	14.3829	14.4828	14.5285	14.4704	14.5449	14.5479	14.4847	M0ZSJ5	Nucleolar protein nop56
16.7317	16.787	16.7623	16.7408	16.6838	16.7456	16.7926	16.7462	16.7569	16.9168	16.7198	16.8342	16.7676	16.7918	16.8899	16.8523	M0ZSK0	ATP-dependent Clp protease proteolytic subunit
16.3491	16.15	16.1518	16.2509	16.3862	16.2502	16.217	16.3048	15.8891	15.8566	15.8933	15.8292	15.7933	15.6954	15.6882	15.7495	M0ZSL3	Calreticulin
16.0157	16.2005	16.1127	16.0909	15.2663	15.2187	15.0217	15.3995	15.6864	15.5708	15.7917	15.512	15.0108	14.8822	15.0241	14.9776	M0ZSL5	Dihydrolipoyl dehydrogenase
16.9202	16.9504	16.8676	16.8716	17.1478	17.1083	17.0989	17.0905	16.7567	16.8103	16.7429	16.7452	16.7525	16.683	16.6512	16.6882	M0ZSL7	Protein disulfide-isomerase
20.2887	20.4156	20.1855	20.2665	20.4064	20.3228	20.3528	20.1931	20.1067	20.2514	20.0441	19.9672	20.3867	20.3317	20.291	20.4056	M0ZSM1	Oxygen-evolving enhancer protein 1, chloroplastic
15.9494	15.962	15.9515	15.844	16.2479	16.1489	16.211	16.1954	16.0247	16.0785	16.039	16.009	16.1198	16.1114	16.1894	16.158	M0ZSN2	Pyroglutamyl-peptidase I
16.3706	16.1837	16.1059	15.9374	15.4866	15.3671	15.3872	15.2174	16.4748	16.5864	16.4814	16.5573	15.7765	15.4458	15.6838	15.7629	M0ZSN7	Uncharacterized protein
16.2678	16.1918	16.3959	16.2293	16.3676	16.3723	16.1883	16.5416	16.125	16.1016	16.1493	16.1491	16.0703	16.3367	16.2858	16.1771	M0ZSP7	2-deoxyglucose-6-phosphate phosphatase
16.0081	15.9903	15.922	15.9129	15.9462	15.9071	16.0034	15.8177	16.021	16.0947	15.8899	16.1028	16.1738	16.04	16.0446	16.0584	M0ZSU7	Spliceosome associated protein
13.3018	13.43	13.0666	13.006	13.3696	13.4175	12.7609	12.4869	12.7069	13.0563	12.9609	12.9589	12.8834	13.1076	12.6994	12.4798	M0ZSY9	Peroxisomal membrane protein pmp34
16.6381	16.7028	16.6476	16.6684	16.5674	16.6681	16.6245	16.5857	16.8147	16.755	16.8154	16.7575	16.9461	16.8703	16.9225	16.9559	M0ZT33	Heme oxygenase 1
18.1773	18.0395	18.1629	18.1428	17.9617	17.887	17.9607	18.0999	18.0461	18.0044	18.0017	18.148	18.0255	18.1908	18.1818	18.1514	M0ZT46	Chlorophyll a-b binding protein, chloroplastic
14.3646	14.3736	14.4073	14.4255	14.3411	13.9909	14.3636	14.5524	14.1524	14.3633	14.1199	14.3578	14.2174	14.592	14.459	14.525	M0ZT50	Cupin_5 domain-containing protein
16.9787	17.033	16.9928	16.9493	17.0653	17.0838	17.03	17.0523	16.8526	16.869	16.8252	16.8465	16.8406	16.8023	16.8535	16.8569	M0ZT51	Proteasome subunit alpha type
14.9901	14.8217	14.9385	14.8994	14.7649	14.9089	14.8368	14.8029	15.5704	15.6096	15.5688	15.7528	15.8131	15.6999	15.7028	15.6696	M0ZT60	HAT-like transposase
15.0546	15.085	15.0717	14.991	15.0708	15.2062	15.0643	14.9917	15.2586	15.4457	15.2666	15.3803	15.5555	15.3656	15.4089	15.4838	M0ZT62	Nucleosome-binding protein
14.2722	14.317	14.3877	14.35	14.0021	14.092	14.193	14.1443	14.3442	14.3845	14.3173	14.456	13.9903	14.1039	14.0861	14.0694	M0ZT74	Pyruvate dehydrogenase E1 component subunit alpha
16.9517	16.9933	16.7941	16.8706	16.7676	16.4975	16.4368	16.5757	16.9611	16.7707	17.0828	17.0138	17.0196	16.6397	16.9723	16.735	M0ZT87	Chaperonin 21
19.4277	19.4368	19.428	19.4235	19.2469	19.3065	19.3316	19.2888	19.2076	19.2604	19.215	19.252	19.2251	19.2176	19.1753	19.2116	M0ZT89	Chaperonin 21
13.981	13.8277	13.9422	13.9582	14.3485	14.2895	14.3632	14.4441	14.5318	14.2866	14.5651	14.3941	14.6773	14.6211	14.5919	14.775	M0ZTF8	Uncharacterized protein
12.8101	11.8165	12.7458	11.9228	13.0973	12.1151	12.9274	12.0191	13.4195	12.3644	13.2824	12.2019	12.3323	10.5983	12.2618	11.3507	M0ZTH0	Uncharacterized protein
14.8019	14.893	14.4361	14.5395	14.8197	14.9208	14.6642	14.7806	14.8002	14.7032	14.8272	14.7653	14.8377	14.8119	14.8681	14.7583	M0ZTH3	Serine/threonine-protein phosphatase
14.621	14.7061	14.6671	14.6566	15.2467	15.2183	14.9279	15.1051	14.8907	14.8279	15.0718	14.6363	15.0451	15.1653	14.9256	15.0954	M0ZTJ2	Ubiquitinyl hydrolase 1
16.6838	16.6262	16.6877	16.6471	17.0282	17.0506	16.8687	16.9555	15.5357	15.2673	15.3459	15.5202	15.1599	15.083	15.2587	15.16	M0ZTK1	Beta-D-glucan exohydrolase
14.1908	14.2707	14.0479	13.9453	14.1555	14.1066	14.4304	14.3512	14.027	13.8952	14.3083	14.1138	14.0728	14.165	14.2045	13.644	M0ZTL9	Cytochrome P450
14.8796	14.7355	14.6824	14.4959	15.0278	14.8006	15.0209	14.9811	14.6746	14.9522	14.9244	14.7377	14.898	15.0285	14.7807	15.1585	M0ZTN9	Ara4-interacting protein
14.2295	14.1894	13.994	13.9607	14.1962	14.0178	14.1068	13.961	13.7553	13.7563	13.744	13.6208	13.7506	13.8962	14.0788	13.8019	M0ZTS0	D1 protease
14.8396	14.8827	14.881	14.87	14.7294	14.8132	14.8191	14.7854	14.992	15.122	15.1077	15.0044	15.0739	15.0849	15.0563	15.2401	M0ZTV9	Cell wall protein TIR4
12.3904	12.3328	12.6659	12.6056	13.3763	13.5541	12.5703	11.5992	14.6317	14.4268	14.7499	14.846	14.9409	14.7053	14.8165	14.8094	M0ZTW3	Leucoanthocyanidin dioxygenase
16.2268	16.1589	16.2034	16.27	15.9687	15.9672	16.0673	16.1627	15.9047	15.9613	15.9397	15.9693	15.6325	15.8727	15.8624	15.894	M0ZTX3	L-galactose dehydrogenase
17.6074	17.6039	17.5867	17.6473	17.4623	17.5562	17.586	17.5041	17.2253	17.309	17.255	17.2648	17.1722	17.1324	17.1224	17.1812	M0ZTX6	Inorganic diphosphatase
15.8118	15.8168	15.7598	15.7782	16.0201	15.8675	15.9883	15.9962	15.417	15.4966	15.4139	15.3698	15.3392	15.4022	15.3874	15.3921	M0ZU24	Heat shock 70 kDa protein, mitochondrial;Heat shock 70 kDa protein, mitochondrial
21.0599	21.137	21.0539	21.0434	20.9988	21.0278	21.0353	21.0067	21.0255	21.0293	21.04	21.0269	20.878	20.9201	20.872	20.8357	M0ZU28	Fructose-bisphosphate aldolase
16.9925	16.9796	16.9054	16.9418	16.6119	16.6205	16.6471	16.6165	16.7673	16.8081	16.8168	16.7776	16.6233	16.5628	16.5747	16.6094	M0ZU44	Elongation factor Ts, mitochondrial
14.9523	14.8855	14.9027	14.9435	15.0282	15.0853	15.0703	15.0427	15.3297	15.3991	15.335	15.3657	15.5062	15.6352	15.3049	15.4622	M0ZU50	Cytochrome P450
13.6219	13.6789	13.7706	13.895	13.8939	13.8454	14.1244	14.0488	13.6543	13.5846	13.6617	13.6689	13.8973	14.0058	13.8867	13.8636	M0ZU79	4-coumarate--CoA ligase
15.1234	15.1821	15.0892	15.1582	15.5696	15.4972	15.4332	15.5407	15.1816	15.0496	15.0252	15.0885	15.3093	15.3134	15.0757	15.0739	M0ZU86	Nucleic acid binding protein
15.3937	15.494	15.4032	15.4305	15.4471	15.4689	15.4671	15.411	15.5948	15.5696	15.5384	15.5755	15.5966	15.4639	15.4968	15.538	M0ZU96	Heterogeneous nuclear ribonucleoprotein A1
15.7044	15.6833	15.5948	15.657	15.3896	15.1789	15.2361	15.3899	16.7145	16.5957	16.7096	16.6354	16.4321	16.4146	16.4982	16.5443	M0ZUA7	Bet_v_1 domain-containing protein
17.7876	17.8244	17.8338	17.8196	17.8714	17.7488	17.7774	17.7841	18.3513	18.3277	18.3779	18.327	18.6364	18.6523	18.6279	18.7132	M0ZUB7	Temperature-induced lipocalin'
15.3148	15.2115	15.6265	15.2961	15.7855	15.6135	15.525	15.6987	14.7444	14.8133	14.5779	14.5203	14.7147	14.3641	14.8508	14.4442	M0ZUB9	Lysosomal pro-X carboxypeptidase
15.1063	14.9145	14.9775	15.1265	14.7544	15.0834	15.0333	15.2744	15.3083	15.3762	15.4248	15.3766	15.0623	15.3866	14.547	15.2329	M0ZUC8	NTGP1
13.2843	12.9803	12.9367	13.1495	13.7415	13.5374	13.6374	13.51	13.0322	13.281	13.1898	13.2572	12.9711	13.2204	12.345	12.5492	M0ZUG4	Lung seven transmembrane receptor
14.9733	14.9189	15.0606	14.9309	15.2666	14.9416	14.9651	15.1815	14.0952	14.0185	14.0134	13.5823	13.5958	14.1483	14.0946	14.45	M0ZUJ8	Taxane 13-alpha-hydroxylase cytochrome P450
16.0382	16.0589	16.0267	16.0389	16.0936	15.9574	15.995	16.0561	15.7931	15.7824	15.8138	15.7302	15.8379	15.782	15.8475	15.8486	M0ZUK9	Methyltransferase
17.8254	17.7463	17.7436	17.7103	17.5252	17.3922	17.4712	17.5348	17.5208	17.3381	17.3839	17.3937	17.1924	17.1279	17.2749	17.2601	M0ZUN5	Uncharacterized protein
17.3698	17.3764	17.2845	17.3555	17.3657	17.2933	17.1937	17.293	17.1171	17.0669	17.0985	17.0272	16.8781	16.9365	16.957	16.9242	M0ZUN9	40S ribosomal protein S20
15.9715	16.0977	16.1019	15.9932	16.2512	16.2611	16.1214	16.1853	15.3556	15.7324	15.4055	15.3526	15.3658	15.4643	15.121	15.5843	M0ZUR3	MFP1 attachment factor 1
16.8356	16.9609	16.8555	16.8874	16.8634	16.9039	16.8499	16.8155	17.1939	17.2439	17.1732	17.2988	17.215	17.3262	17.3135	17.2619	M0ZUS6	Uncharacterized protein
15.89	16.2773	16.2002	15.9941	16.1715	16.1151	16.1624	16.2196	15.8479	16.0104	15.9479	15.7502	16.1285	15.9931	15.9522	15.9703	M0ZUU5	P450 mono-oxygenase
11.4485	11.4644	11.44	11.246	11.7356	11.8649	11.9579	11.8716	12.7749	12.8161	12.821	12.9667	12.9527	12.7801	12.7853	12.8606	M0ZUX5	DNA double-strand break repair rad50 ATPase
17.6116	17.6994	17.6482	17.6443	17.8112	17.7867	17.8273	17.7511	17.5197	17.561	17.4837	17.4851	17.5393	17.4848	17.5079	17.5253	M0ZV40	Vacuolar proton pump subunit B
15.0206	15.0559	15.0963	14.9641	14.8757	14.8333	14.838	15.0138	14.9072	14.9268	14.9681	15.158	13.7522	14.9221	14.9775	15.0291	M0ZV80	Thioredoxin
16.8393	16.7797	16.8248	16.8029	17.1532	17.0531	16.9619	16.9833	16.3714	16.4339	16.3957	16.407	16.4678	16.5733	16.5467	16.5736	M0ZV96	Alpha-galactosidase
16.4485	16.3637	16.4656	16.4349	16.4219	16.3488	16.4043	16.4967	16.2047	16.1316	16.1374	16.2249	16.2679	16.2679	16.2586	16.2201	M0ZVI1	Glucose-6-phosphate 1-epimerase
16.1502	16.1615	16.2342	16.2983	16.2478	16.2161	16.3135	16.3782	16.145	16.0785	16.1906	16.2474	16.1171	16.3615	16.2317	16.2613	M0ZVI4	Protein yrdA
16.7686	16.7724	16.7144	16.6781	16.6982	16.4103	16.3823	16.5087	16.4683	16.4268	16.4688	16.5783	16.3776	16.331	16.5365	16.4093	M0ZVJ6	Proteasome subunit beta
13.1275	12.0453	13.1247	11.1573	11.2423	11.5504	12.3148	11.0489	13.0196	12.8823	12.686	12.7429	12.7674	12.5404	12.7587	12.781	M0ZVM3	Ferulate-5-hydroxylase
18.3971	18.3684	18.3762	18.4567	18.4084	18.3896	18.4967	18.3612	18.5731	18.6242	18.6847	18.7051	18.7675	18.7134	18.6564	18.7056	M0ZVM9	Fructose-bisphosphate aldolase
16.1088	15.911	16.1193	16.096	15.6977	15.8141	15.559	15.8966	15.8959	15.6762	15.4588	15.8004	15.887	15.9763	15.7852	15.8787	M0ZVP6	Small nuclear ribonucleoprotein Sm D3
13.5362	13.4129	13.5712	13.6728	13.6578	13.6474	13.5193	13.5189	14.2917	14.0197	14.143	14.1545	14.2584	14.1767	14.1747	14.0541	M0ZVQ2	Flavanone 3 beta-hydroxylase
19.0614	19.1378	19.0906	19.0778	18.9932	18.9843	18.9889	18.9595	18.9916	18.9637	18.9649	18.9605	19.0446	18.9824	19.0576	19.0767	M0ZVR1	Ferredoxin--NADP reductase, chloroplastic
15.3376	15.3429	15.3237	15.2478	15.4096	15.3378	15.339	15.4087	15.0798	15.1421	15.1208	15.2469	15.0847	15.167	15.1999	15.2926	M0ZVS6	26S proteasome non-atpase regulatory subunit
16.001	16.0368	16.0022	16.0241	15.9866	15.9227	15.9613	15.9482	15.9956	15.9135	15.998	16.0186	15.9647	15.9925	15.972	15.9598	M0ZVT8	Dehydroquinate synthase
14.0094	13.9126	13.9684	13.8182	13.8505	13.7518	13.7233	13.6425	14.4499	14.3147	14.4103	14.4433	14.4552	14.5003	14.4152	14.3791	M0ZVV5	Phospholipase D
13.5902	13.4624	13.844	13.4904	14.1155	14.204	14.0705	14.1072	14.8576	15.1696	14.8974	15.1693	16.0076	15.7687	15.8075	15.9098	M0ZW28	H1 histone
15.5671	15.5137	15.535	15.5141	15.3115	15.3695	15.588	15.5021	15.3745	15.6428	15.3808	15.6461	15.3657	15.502	15.4733	15.4272	M0ZW66	Usp domain-containing protein
15.1208	15.4402	15.2991	14.9139	15.9531	15.8736	15.8459	16.1427	14.3907	13.4597	13.9836	13.6737	13.6028	13.9083	13.7183	13.9591	M0ZW73	Aspartic proteinase nepenthesin-1
15.5458	15.5667	15.5835	15.4954	15.7431	15.5533	15.6151	15.6861	14.4524	14.3782	14.3722	14.1992	14.4892	14.5759	14.651	14.5321	M0ZW80	Amine oxidase
16.4593	16.234	16.4222	16.2545	15.9267	15.9175	16.0235	16.0018	15.9514	16.0483	15.781	15.9928	15.6451	15.8629	15.9446	15.8571	M0ZW90	Senescence-associated protein
15.0074	15.0278	15.0967	14.9192	15.0739	15.1449	15.149	15.1357	15.004	15.0286	14.9649	14.967	14.9667	14.8268	14.9463	14.6225	M0ZW98	Cytosolic purine 5-nucleotidase
17.1159	17.0654	16.9498	16.9808	16.8633	16.9097	16.8519	16.826	16.6797	16.7752	16.7306	16.6914	16.384	16.285	16.2803	16.2857	M0ZWA9	Phenylcoumaran benzylic ether reductase
17.0519	17.0444	17.0907	17.0397	17.1407	17.1374	17.2411	17.2161	17.0241	17.0835	17.0407	17.1015	17.1653	17.2117	17.1454	17.1421	M0ZWB1	Protein yrdA
17.718	17.7412	17.6747	17.6549	17.2599	17.305	17.3097	17.2844	17.2908	17.2876	17.3264	17.3383	17.0723	17.0629	17.1079	17.1444	M0ZWB6	50S ribosomal protein L31
15.6046	15.5565	15.6375	15.6548	16.295	16.1777	16.24	16.2669	16.1767	16.0975	16.17	16.2127	16.2085	16.3083	16.2167	16.2604	M0ZWD8	Pre-pro-cysteine proteinase
17.6171	17.7178	17.6678	17.6503	17.5831	17.7747	17.6551	17.6317	17.4773	17.6122	17.4797	17.5459	17.6333	17.595	17.6394	17.552	M0ZWI5	Uncharacterized protein
14.5219	14.4506	14.3197	14.4158	14.4402	14.3008	14.2516	14.4983	14.372	13.9521	14.1672	14.2846	14.1591	14.1836	14.1427	14.331	M0ZWJ1	Maf protein
17.0769	16.8835	16.9741	17.0534	17.1729	17.2522	17.1472	17.1653	16.6767	16.9389	16.7678	16.9975	17.0184	17.1024	17.0517	17.0019	M0ZWJ3	Sugar transporter ERD6-like 6;Sugar transporter
16.5415	16.6185	16.6111	16.547	16.6019	16.6338	16.6352	16.6346	16.4986	16.4911	16.5088	16.5781	16.5106	16.554	16.5628	16.4603	M0ZWK0	Proteasome subunit alpha type
14.5449	14.4202	14.5169	14.4694	14.0688	14.3837	14.2149	14.3462	14.2748	14.2497	14.4401	14.4494	14.053	14.1727	14.0544	14.0338	M0ZWL6	GTP-binding protein hflx
17.2399	17.2268	17.1899	17.2185	17.3085	17.3006	17.1649	17.3373	17.1371	17.0824	17.1328	17.1904	17.0447	16.8888	17.0989	17.1155	M0ZWN2	Thioredoxin
15.2177	15.1092	15.1958	15.2351	15.4618	15.4047	15.4297	15.4574	15.3926	15.377	15.4191	15.4129	15.3021	15.3458	15.2584	15.3179	M0ZWP5	Coatomer subunit alpha
14.1127	13.9452	14.1373	13.9987	14.0425	14.0917	14.1446	13.9139	14.2998	14.1076	14.3935	14.4597	14.5899	14.579	14.6278	14.5339	M0ZWP6	Tetratricopeptide repeat protein, tpr
15.3177	15.2184	15.3416	15.3184	15.3926	15.4153	15.3196	15.4348	15.0109	14.8194	15.0239	14.9394	14.7582	14.6236	14.5782	14.7864	M0ZWP7	Heat shock protein binding protein
13.857	13.6672	13.8179	13.76	13.8758	13.5811	13.71	13.6721	14.2048	13.9855	13.8505	13.7284	13.7882	14.0235	13.9467	13.9412	M0ZWQ6	TLDc domain-containing protein
17.6488	17.7601	17.5076	17.6147	17.6422	17.519	17.2293	17.2773	18.2678	18.0801	18.214	18.0816	18.4587	18.3096	18.3384	18.5347	M0ZWR8	Uncharacterized protein
16.8636	16.5759	16.8111	16.8938	16.7766	16.6605	16.8095	16.8609	15.275	15.1502	15.4476	15.4653	15.1071	15.4875	15.1518	15.3302	M0ZWT2	Endo-1,3-1,4-beta-d-glucanase
15.804	15.7585	15.7877	15.789	15.9854	15.8558	15.8621	15.9368	16.0099	15.8846	15.9645	16.0222	16.0439	16.0475	15.996	16.0569	M0ZWY7	Elongation factor Tu
15.486	15.4307	15.464	15.3892	15.9028	15.7474	15.7392	15.807	15.2251	15.031	15.1604	14.942	15.0919	15.1491	14.8291	15.1326	M0ZWZ8	Sugar transporter
15.8868	16.0105	15.9217	15.9288	15.9338	16.0078	15.8585	15.8691	16.5048	16.3182	16.3909	16.271	16.4552	16.3362	16.5205	16.482	M0ZX18	Uncharacterized protein
15.7946	15.692	15.7094	15.619	15.6765	15.6286	15.4743	15.6729	15.0091	15.1296	15.1046	15.1447	15.1497	14.949	15.1232	15.1005	M0ZX98	P69F protein
16.4802	16.4859	16.4054	16.4946	16.3538	16.5454	16.5051	16.4051	16.1519	16.4868	16.3664	16.3832	16.2703	16.2681	16.2138	16.2823	M0ZXA2	Copper chaperone
14.8973	14.9894	15.0847	14.9814	14.9033	15.2065	15.164	15.0258	15.1403	15.2363	15.0974	15.0231	14.8988	15.1004	15.1822	15.1964	M0ZXA8	Acc synthase
17.8741	17.94	17.8289	17.8692	17.9132	17.9005	17.8187	17.8172	17.9068	17.9104	17.8802	17.8657	18.0338	17.9467	17.9562	17.9888	M0ZXB6	ATP-dependent clp protease
16.903	16.9584	16.9624	16.9924	17.6271	17.5963	17.5438	17.6644	16.5349	16.4873	16.4631	16.6479	16.5358	16.5419	16.5605	16.5121	M0ZXE1	P69B protein
16.0159	16.0243	16.0218	15.9892	16.9248	16.6903	16.6945	16.8092	15.4591	15.4257	15.4317	15.4997	15.4156	15.6338	15.4936	15.5547	M0ZXE4	Serine protease
15.9949	15.4839	15.9223	15.3695	15.8913	15.2994	15.7264	15.2832	15.3474	15.3783	15.2982	15.3372	15.4008	15.4812	15.4299	15.3336	M0ZXE7	ADP-sugar diphosphatase
17.8564	18.0019	17.9172	17.8757	17.9437	18.0132	17.9257	17.8747	17.9044	18.0305	17.9232	17.9211	18.0786	17.9473	18.0078	18.0791	M0ZXG5	ATP-dependent Clp protease proteolytic subunit
15.382	15.3256	15.3482	15.1912	15.3211	15.3235	15.4267	15.3878	15.4127	15.4099	15.3906	15.5646	15.3468	15.5149	15.2434	15.2444	M0ZXK7	Acetylglutamate kinase
18.02	18.0849	18.0978	18.0433	18.1959	18.0208	18.1889	18.1084	18.2316	18.2359	18.2108	18.1965	18.3126	18.2763	18.2684	18.3333	M0ZXL7	Actin
16.2039	16.3047	16.2199	16.2089	16.2472	16.234	16.1514	16.2084	16.7233	16.5327	16.6617	16.4696	16.8631	16.8053	16.8672	16.8073	M0ZXM1	Structural molecule
16.7889	16.9025	16.9349	16.6401	16.5354	16.3015	16.6048	16.7911	16.6075	16.2307	16.5354	16.6508	16.2885	16.72	16.4483	16.355	M0ZXM4	U6 snRNA-associated Sm-like protein LSm3
16.7641	16.7865	16.8443	16.8104	17.12	17.1917	17.2081	17.1573	16.8653	16.8197	16.8959	16.8094	16.9035	16.9268	16.8086	16.9389	M0ZXR4	Nicotinate phosphoribosyltransferase
15.5947	15.6323	15.6125	15.5631	15.8762	15.8416	15.6307	15.7383	15.9432	15.9018	15.8033	15.7826	15.9358	15.7445	15.9804	16.0375	M0ZXS8	RNA-binding protein
13.4186	13.4801	13.5551	13.4347	13.4896	13.5963	13.6143	13.5607	13.6031	13.6392	13.6031	13.5501	13.4636	13.5273	13.4817	13.6039	M0ZXT5	Phenylalanine--tRNA ligase
16.9129	16.9794	16.935	16.8908	16.9877	16.9682	17.0085	16.9822	16.9214	16.9262	16.9323	16.8877	17.0944	17.0043	17.0944	17.1171	M0ZXU2	CBS domain containing protein
16.5479	16.4692	16.5625	16.5705	16.4077	16.4148	16.4593	16.4985	16.3343	16.3312	16.3655	16.3142	16.1117	16.1226	16.0772	16.0573	M0ZXU5	Cyclin delta-3
15.5114	15.622	15.4055	15.489	15.055	14.9005	15.0226	15.0814	15.1082	15.1586	15.1892	15.0844	14.9881	14.9075	14.8506	15.141	M0ZXX6	Uncharacterized protein
14.633	14.738	14.6107	14.6499	14.9779	14.978	14.8683	14.8753	14.6173	14.7556	14.6875	14.7726	14.6722	14.7212	14.7431	14.5907	M0ZY03	Glycerophosphodiester phosphodiesterase
16.0654	16.0394	16.1034	16.0531	16.2725	16.1726	16.2781	16.2886	16.2369	16.1797	16.2228	16.281	16.4456	16.4695	16.411	16.4131	M0ZY56	Plasma membrane ATPase
16.7437	16.7773	16.7006	16.8006	16.8526	16.8209	16.8074	16.7653	16.6064	16.6445	16.6462	16.651	16.6539	16.5913	16.6021	16.601	M0ZY64	Spermidine synthase
15.186	15.3351	15.1634	15.2909	15.5958	15.5495	15.62	15.43	15.4047	15.3794	15.3652	15.3759	15.4393	15.4479	15.4329	15.3771	M0ZY73	AP-1 complex subunit gamma
17.9592	17.9448	17.8638	17.9107	17.5812	17.6206	17.6232	17.5892	17.7429	17.7181	17.7606	17.7675	17.5788	17.4912	17.5107	17.5211	M0ZY84	30S ribosomal protein S13, chloroplastic
17.588	17.5703	17.5729	17.5518	17.4492	17.4224	17.4077	17.4772	17.3584	17.321	17.3411	17.3568	17.1678	17.2876	17.2392	17.1392	M0ZY89	Ribosomal protein S9
15.6907	15.6214	15.5102	15.7926	15.7085	15.5958	15.4804	15.6918	15.4989	15.5058	15.6511	15.4701	15.3521	15.5908	15.321	15.4338	M0ZYC0	Cell division protein ftsH
15.7997	15.8003	15.7658	15.7294	16.265	16.2041	16.197	16.2539	15.3777	15.5391	15.4505	15.4249	15.3276	15.3539	15.3157	15.323	M0ZYC1	Protein disulfide-isomerase
15.9082	15.9281	15.7906	15.8603	15.6724	15.6179	15.7363	15.6737	15.9141	15.9932	15.9938	16.0638	15.7137	15.7194	15.6824	15.6199	M0ZYC4	Thiamine biosynthesis protein ThiC variant L1
15.5295	15.6172	15.4818	15.4875	15.2362	15.3799	15.2327	15.2406	14.9949	14.882	15.07	15.0761	14.5938	14.694	14.7073	14.6644	M0ZYC7	Anthranilate synthase
14.2091	13.8341	14.3293	14.2507	14.315	14.4874	14.0545	13.8442	13.7567	13.8012	13.7165	13.243	13.3654	13.9194	11.9576	13.6988	M0ZYD9	Hydrolase, hydrolyzing O-glycosyl compounds;Hydrolase, hydrolyzing O-glycosyl compounds;Hydrolase, hydrolyzing O-glycosyl compounds
15.5922	15.4952	15.584	15.5723	15.6549	15.7364	15.6218	15.6544	15.3985	15.2732	15.326	15.2651	15.4735	15.5022	15.3846	15.3486	M0ZYF3	Internal alternative NAD(P)H-ubiquinone oxidoreductase A1, mitochondrial;Internal alternative NAD(P)H-ubiquinone oxidoreductase A1, mitochondrial
15.344	15.173	15.2423	15.2256	15.4227	15.0394	14.9809	15.0739	15.4581	14.945	15.3811	15.4869	15.3851	15.3113	15.3894	15.4364	M0ZYP2	Membrane bound O-acyl transferase family protein
15.0014	14.7944	14.9887	15.1797	15.4589	15.3292	15.9724	15.4407	15.5309	15.8703	15.5766	15.6237	15.4352	15.508	15.3489	15.5764	M0ZYR0	Tubulin alpha chain
14.6807	14.5179	14.624	14.5882	14.848	14.7779	14.7778	14.7873	14.7829	14.6409	14.7261	14.7356	14.8229	14.7503	14.8169	14.8447	M0ZYT1	Importin beta-3
15.5351	15.5043	15.5744	15.4075	16.0558	16.0703	16.0227	16.0331	14.5254	14.4291	14.5635	14.5528	14.5194	14.5951	14.6595	14.5323	M0ZYT4	EIG-I24 protein
20.1676	20.3908	20.1751	20.1077	20.2615	20.2095	20.3292	20.2223	20.026	20.2608	19.9144	19.9737	20.1807	20.271	20.3192	20.2474	M0ZYW1	Chlorophyll a-b binding protein, chloroplastic
16.0693	16.0714	16.097	16.0819	16.0447	16.1206	15.9851	16.0368	15.7108	15.7852	15.7168	15.7187	15.7163	15.6944	15.6473	15.6462	M0ZZ00	Peptidylprolyl isomerase
16.9444	16.3427	16.4754	16.4622	16.9952	15.9618	16.4442	16.3405	16.1927	15.0753	15.7535	15.9528	16.2639	15.8558	15.8027	15.044	M0ZZ08	Pyruvate dehydrogenase E1 component subunit beta
19.9703	19.9509	20.0285	20.0587	19.9076	19.9267	20.0501	19.9945	20.2729	20.3479	20.3286	20.3612	20.2983	20.3978	20.2418	20.2527	M0ZZ31	Glutamine synthetase
15.7634	15.6585	15.6616	15.7386	15.49	15.482	15.377	15.4522	15.3239	15.2286	15.3566	15.4537	14.9652	14.903	14.9115	14.9066	M0ZZ66	Neutral ceramidase
17.9638	17.9204	17.8799	17.9068	17.6626	17.6121	17.7079	17.6317	17.7778	17.8748	17.7728	17.6988	17.6743	17.6344	17.7496	17.6583	M0ZZE2	Triosephosphate isomerase, chloroplastic
16.8743	16.8557	16.9483	16.8905	16.883	16.9511	16.8883	16.9322	16.3986	16.3903	16.3757	16.474	16.2997	16.3748	16.3016	16.3205	M0ZZG9	Glutaredoxin, grx
16.0822	15.9629	16.0077	16.1236	15.9118	15.9707	15.9864	15.9752	15.8778	15.632	15.7754	15.941	15.8248	15.8276	15.7554	15.8026	M0ZZH4	Chlorophyll a-b binding protein, chloroplastic;Chlorophyll a-b binding protein, chloroplastic
14.9502	14.8747	14.9142	14.9669	15.3579	15.2737	15.3331	15.4135	14.741	14.5489	14.6164	14.6152	14.7548	14.6636	14.7236	14.7761	M0ZZL1	Xaa-Pro aminopeptidase 2
16.4606	16.502	16.6133	16.4659	16.0882	16.1258	16.054	16.1436	15.7421	15.6956	15.7998	15.8745	15.5505	15.7189	15.602	15.7317	M0ZZL3	Glycosyltransferase
13.6376	13.8139	13.6029	13.8344	13.8188	13.8768	13.9019	13.7143	13.5139	13.1488	13.3311	13.4473	13.5089	12.4561	11.1565	13.3485	M0ZZP1	Transmembrane 9 superfamily member
15.3257	15.464	15.4494	15.5049	15.6512	15.5944	15.4462	15.6593	14.7471	14.3817	14.7483	14.6978	14.2301	14.6807	14.3581	14.6953	M0ZZV1	Ubiquitin-associated /TS-N domain-containing protein
17.5566	17.4398	17.39	17.4983	17.1537	17.0892	17.1082	17.1897	16.8086	16.7031	16.8059	16.7884	16.3422	16.3335	16.2886	16.355	M0ZZV7	Adenosylhomocysteinase
15.5675	15.5742	15.6459	15.4042	15.556	15.4209	15.5431	15.4373	15.8771	15.9095	15.8603	16.0962	16.1758	16.21	16.1625	16.201	M0ZZX7	Hydrolase, alpha/beta fold family protein;Hydrolase, alpha/beta fold family protein
16.296	16.2678	16.1265	16.3155	16.4479	16.2048	16.3528	16.3315	16.3895	16.4284	16.452	16.378	16.5295	16.4015	16.4857	16.5308	M0ZZZ3	Serine/threonine-protein kinase PBS1
19.855	19.9972	19.8976	19.8931	19.9679	20.0586	20.0308	19.92	19.803	19.9535	19.8832	20.0313	20.0829	19.931	19.8827	20.0063	M1A024	Ubiquitin;Ubiquitin;Ubiquitin-40S ribosomal protein S27a
17.5826	17.6566	17.5802	17.5888	17.9732	17.8778	17.9404	17.9286	17.3835	17.421	17.3766	17.3624	17.5813	17.5987	17.5685	17.5182	M1A028	Dihydrolipoyl dehydrogenase
15.5254	15.53	15.5258	15.5335	15.9696	15.818	15.5412	15.6786	14.9247	14.3838	14.4125	14.8339	14.8784	14.6368	14.9995	14.9685	M1A035	Carboxypeptidase
15.8491	15.8805	15.8908	15.8164	15.798	15.8076	15.7473	15.8165	15.9094	15.8871	15.8245	15.8377	16.0851	16.054	16.1231	16.0833	M1A063	Epoxide hydrolase 1
14.0392	14.1667	14.0294	14.1571	14.5701	14.4667	14.4359	14.3829	14.7952	14.866	14.8665	14.8147	15.1961	15.2194	15.1392	15.0943	M1A065	3-hydroxyacyl-CoA dehydrogenase
19.3948	19.3429	19.3599	19.4022	19.2501	19.2922	19.3215	19.2945	19.537	19.5113	19.5518	19.5398	19.516	19.527	19.4544	19.5192	M1A0A3	Alanine--glyoxylate aminotransferase
13.4645	13.4321	13.4818	13.4188	13.367	13.0312	13.1098	13.2493	13.1587	13.1897	13.1732	13.146	13.3199	12.7556	13.2089	13.273	M1A0A9	Uncharacterized protein
15.7202	15.6442	15.6254	15.6481	15.1468	15.1318	15.2697	15.1958	15.3727	15.3587	15.3531	15.4364	15.2027	15.1489	15.2363	15.1908	M1A0E2	50S ribosomal protein L18, chloroplast
15.0363	15.0084	15.1381	14.9117	15.1307	15.0128	15.1738	15.1011	15.3577	15.4052	15.3639	15.3786	15.4295	15.6434	15.4925	15.37	M1A0F1	Pto-interacting protein 1
15.8949	15.6407	15.7906	15.8283	15.9623	15.8604	15.7661	16.0006	15.9655	15.8114	15.9722	16.043	15.906	16.0345	15.9013	15.9062	M1A0I0	Protein-synthesizing GTPase
15.4335	15.3908	15.3277	15.3795	15.0557	15.1266	15.0939	15.1742	14.7525	14.6286	14.7023	14.8664	14.5808	14.6483	14.6249	14.8724	M1A0K1	Peptidyl-prolyl cis-trans isomerase
13.8405	14.2338	14.3753	13.8619	14.5608	14.5651	14.5749	14.225	13.844	14.0113	13.9351	14.2597	14.1795	13.9893	14.2785	14.0841	M1A0L1	ATP binding / binding / protein kinase/ protein serine/threonine kinase/ protein tyrosine kinase
16.6779	16.5976	16.4279	16.5268	16.4032	16.1132	16.2766	16.0792	16.0671	16.0186	16.2089	16.0729	16.1085	16.0483	16.0232	15.8836	M1A0N1	Uncharacterized protein
17.5878	17.5683	17.5846	17.5965	17.5025	17.4737	17.558	17.5276	17.3872	17.3682	17.4194	17.394	17.358	17.3533	17.3437	17.3187	M1A0N5	Elongation factor G, chloroplastic
14.9129	14.7414	14.9873	14.9388	15.309	15.1351	15.1328	15.4004	13.8164	13.3098	13.7249	13.9385	12.9203	13.0566	12.9422	13.0053	M1A0V3	Cytochrome P450
15.7975	15.8597	15.864	15.8292	15.8917	15.8576	15.9095	15.9142	16.1312	16.2351	16.1057	16.1884	16.2122	16.12	16.1061	16.1766	M1A0V9	Hsp70-interacting protein 1
15.1137	15.0931	15.0886	15.0938	15.2758	15.2486	15.2862	15.2767	15.3052	15.3923	15.3448	15.3199	15.3722	15.3391	15.308	15.3117	M1A0W3	Heat shock protein 70 (HSP70)-interacting protein
17.3248	17.3942	17.3791	17.2989	17.2958	17.2936	17.2895	17.2301	17.3467	17.45	17.356	17.304	17.3223	17.239	17.3696	17.3145	M1A0W9	Thylakoid lumenal protein, chloroplastic
16.709	16.6871	16.6035	16.5396	16.2712	16.3623	16.3267	16.362	16.4109	16.4331	16.3903	16.5366	16.5575	16.4524	16.4859	16.4541	M1A0X0	Multicopper oxidase
15.1405	14.84	14.7703	14.9173	14.2224	13.8167	13.806	14.4153	13.4697	13.8428	12.9309	13.844	12.6766	13.154	12.5186	12.9075	M1A0X2	Transaldolase
14.9576	14.7229	14.9503	14.8985	15.0758	15.1326	15.0848	15.2136	14.9995	14.7562	14.8596	15.0011	14.9463	15.1593	15.1678	14.9486	M1A0Z9	Chaperone protein dnaJ
15.6451	15.5547	15.5194	15.599	15.5983	15.6324	15.5552	15.6369	15.6896	15.5747	15.6663	15.6478	15.4953	15.5448	15.3979	15.5291	M1A129	Acyl-coenzyme A oxidase
15.58	15.5253	15.4497	15.387	15.4214	15.3837	15.2913	15.4222	15.2955	15.2482	15.3381	15.2963	15.0922	15.1232	15.1405	15.121	M1A136	Ribosomal protein L28
14.6104	14.5764	14.6023	14.6137	14.7803	14.7012	14.8034	14.509	14.4264	14.5486	14.6695	14.5168	14.6483	14.3586	13.3137	14.4832	M1A167	Glycylpeptide N-tetradecanoyltransferase
15.9038	15.8966	15.8771	15.9472	16.1691	16.1403	16.0806	16.1166	16.0869	16.0579	16.0739	16.1007	16.0926	16.115	16.1114	16.1594	M1A1A0	26S protease regulatory subunit 7 homolog A
15.4635	15.4366	15.4992	15.4899	15.9282	15.6937	15.7103	15.9416	15.0555	14.6188	14.9667	15.1123	14.7787	15.0111	14.8195	15.1576	M1A1B1	Transmembrane 9 superfamily member
16.729	16.627	16.6711	16.7032	16.6107	16.5107	16.5974	16.6323	16.4268	16.4909	16.4449	16.5203	16.238	16.2583	16.2082	16.1778	M1A1D2	Subtilase family protein
13.7442	13.6881	13.6457	13.6214	14.1499	14.104	13.9994	14.0358	13.8434	13.9062	13.7448	13.7122	13.7757	13.9534	13.9401	13.6207	M1A1E3	Alanine aminotransferase
16.552	16.2816	16.1802	16.3419	15.8486	15.6242	15.6254	15.5785	16.165	15.6506	16.0295	16.046	15.8567	15.7666	15.8005	15.8421	M1A1H1	Uncharacterized protein
15.3107	15.3633	15.8667	15.0061	16.4225	16.4203	16.0605	15.7936	15.5028	16.1903	15.9308	15.8839	16.166	15.7345	15.8703	15.5861	M1A1K0	Poly(RC)-binding protein
14.8934	15.3723	15.232	14.9525	15.5522	12.5574	14.8414	14.9736	14.7717	14.726	14.6113	14.8247	14.4187	14.8493	14.4192	14.1483	M1A1K1	Xylulose kinase
14.9696	14.8965	14.9741	14.7728	15.1547	14.8654	15.1387	15.3228	14.6545	14.4029	14.5456	14.7079	14.463	14.774	14.8085	14.663	M1A1R9	Glutathione-s-transferase theta, gst
15.2737	15.2169	15.2917	15.2349	15.226	15.368	15.2756	15.4043	15.2289	15.336	15.1805	15.4484	15.3589	15.3394	15.4162	15.4066	M1A1S2	Glutathione peroxidase
17.8346	17.9229	17.8348	17.7977	17.4753	17.5941	17.4765	17.4034	18.11	18.1252	18.0789	18.1322	18.1802	18.055	18.0784	18.1252	M1A1S5	Major intrinsic protein 1
15.2545	15.1581	15.2954	15.2643	15.5394	15.4292	15.5163	15.4863	15.7499	15.6651	15.6687	15.6893	15.8314	15.856	15.8622	15.8275	M1A1W0	Alcohol dehydrogenase
14.0889	14.4401	14.5502	14.656	15.0032	14.8956	14.5379	14.9003	14.893	15.201	14.9238	15.143	15.0468	14.7597	14.9477	14.9196	M1A1Y0	Crooked neck protein
17.1213	17.1872	17.1866	17.2475	17.2784	17.4164	17.4647	17.5058	17.1173	17.1446	17.0457	17.1979	17.29	17.2881	17.143	17.365	M1A219	Usp domain-containing protein
16.117	16.1646	16.2114	16.1672	15.9735	15.9309	16.0637	16.0249	16.4276	16.3872	16.4568	16.4369	16.4519	16.4557	16.4512	16.4855	M1A271	Non-intrinsic ABC protein
16.3141	16.1879	16.2374	16.1662	16.4146	16.3369	16.4198	16.3571	16.4267	16.5012	16.4979	16.54	16.4029	16.4585	16.4115	16.3083	M1A272	Nuclear acid binding protein
17.3294	17.3093	17.3388	17.3949	17.6037	17.6879	17.748	17.6159	17.353	17.481	17.3762	17.3787	17.3982	17.4807	17.354	17.4839	M1A288	Glutaredoxin-dependent peroxiredoxin
15.7853	15.3569	15.494	15.5722	14.6914	14.8013	14.3226	14.9769	15.1122	14.7412	14.4819	15.2122	14.1731	14.7449	14.4104	14.3783	M1A299	Uncharacterized protein
18.1429	18.1409	18.1388	18.1131	18.0194	17.9524	18.0129	17.9952	18.2805	18.3919	18.3314	18.3411	18.2586	18.3246	18.1968	18.2225	M1A2B4	Malate dehydrogenase
14.3784	14.1733	14.0749	14.0026	13.9185	13.812	13.8599	13.9647	14.8373	14.6459	14.9168	14.7787	14.7411	14.5336	14.7178	14.5041	M1A2D6	Aspartyl-tRNA synthetase
17.2504	17.2976	17.2154	17.2625	17.2391	17.246	17.2399	17.2158	17.1203	17.1062	17.1445	17.1009	17.1118	17.1302	17.1022	17.1183	M1A2E9	Pore protein of 24 kD (OEP24)
14.8141	14.6421	14.7901	14.8235	14.9808	14.8757	14.8637	14.9487	14.6354	14.7775	14.5512	14.4458	14.1226	14.1221	14.0452	13.7875	M1A2F8	Glycosyltransferase
16.7564	16.7926	16.652	16.7171	16.5824	16.6507	16.5882	16.5086	16.519	16.415	16.5281	16.5001	16.611	16.5053	16.4958	16.5369	M1A2J8	Uncharacterized protein
16.6765	16.6533	16.7965	16.7412	16.6228	16.6796	16.618	16.6679	16.5623	16.577	16.6208	16.5789	16.7465	16.7351	16.7641	16.7821	M1A2M6	Patellin 1
15.6316	15.5594	15.5042	15.5721	15.2147	15.3449	15.2764	15.4088	15.4312	15.3493	15.3428	15.4254	15.1786	15.5056	15.2897	15.2271	M1A2N0	40S ribosomal protein S11
14.2684	13.6466	13.8965	14.2158	13.7232	13.9021	14.0125	14.1995	14.495	14.272	14.1099	14.1691	14.2347	14.0143	13.9472	14.2339	M1A2N1	Uncharacterized protein
15.6434	15.9724	15.3258	15.3476	15.3976	15.9391	15.4579	15.5519	15.6355	15.7191	15.6865	15.7357	15.48	15.4953	15.6356	14.7328	M1A2N5	Cinnamoyl-CoA reductase
15.3551	15.3794	15.2242	15.2314	15.3041	15.2732	14.9943	15.1783	15.4046	15.3388	15.3502	15.3113	15.536	15.5205	15.5494	15.6035	M1A2P1	Cyclase/dehydrase
15.7605	15.5609	15.7092	15.6007	15.728	15.4488	15.5945	15.6712	16.5931	16.5307	16.553	16.5159	16.5035	16.4935	16.5805	16.5852	M1A2S2	Aminocarboxymuconate-semialdehyde decarboxylase
19.6641	19.5685	19.5968	19.6584	19.4926	19.4621	19.4892	19.4178	19.1543	19.2435	19.1399	19.2771	19.2405	19.2081	19.1931	19.331	M1A2T5	Peptidyl-prolyl cis-trans isomerase
17.2038	17.1415	17.0943	17.1423	16.7825	16.7117	16.8089	16.8974	16.3919	16.4721	16.4774	16.5968	16.2136	16.3179	16.364	16.4311	M1A2V2	4a-hydroxytetrahydrobiopterin dehydratase
15.6766	15.717	15.712	15.6864	15.4478	15.5599	15.5054	15.4641	15.4828	15.4412	15.4871	15.5642	15.6564	15.6768	15.632	15.6074	M1A2V5	Superoxide dismutase
12.1581	12.1662	12.4153	12.3888	12.7195	12.5053	12.5131	12.6301	12.6734	12.669	12.7203	12.8376	12.6951	12.6767	12.7459	12.8051	M1A2V8	Sec10
15.8284	15.639	15.6791	15.7461	16.0807	15.9164	15.8689	16.046	15.7448	15.7917	15.7909	15.769	15.9729	15.9069	15.9312	15.7864	M1A2V9	Uncharacterized protein
16.5353	16.5043	16.5358	16.6082	16.5118	16.5398	16.5512	16.4583	16.4471	16.4462	16.4704	16.4822	16.4374	16.4314	16.4401	16.4419	M1A2W5	Translocase of chloroplast
16.5219	16.3009	16.5381	16.4609	16.7455	16.6031	16.5305	16.6095	16.4491	16.3267	16.4531	16.4208	16.6178	16.4643	16.5663	16.5661	M1A2Y2	NADH dehydrogenase
22.671	22.6999	22.4746	22.3938	22.4487	22.3096	21.9166	22.1167	22.3758	22.0815	22.2052	22.2392	22.302	22.3952	22.4015	22.4853	M1A322	Cytochrome b559 subunit alpha
13.2952	12.8949	13.215	12.9543	13.2496	13.0277	13.1226	13.1588	12.8262	12.7615	12.7963	12.7826	12.5444	12.6919	12.4035	12.5959	M1A379	Alpha-glucosidase
14.5421	14.4539	14.6412	14.6323	15.4152	15.3174	15.2435	15.4663	14.0293	13.9813	14.0088	14.0389	13.8977	14.0707	13.8882	13.9131	M1A383	Calreticulin
14.4533	14.6552	14.8531	14.6086	15.3332	15.3049	15.2274	15.2338	14.9978	14.9691	15.0187	14.7978	15.1166	15.3775	15.3414	15.3647	M1A396	Acyl-CoA thioesterase
16.1877	16.1743	16.1753	16.1355	16.2665	16.4746	15.9007	16.3981	16.1577	16.1301	16.324	16.3565	16.3136	16.1254	16.2046	16.4451	M1A3D2	Trafficking protein particle complex subunit
19.1467	19.1762	19.1092	19.1064	18.9319	19.1909	18.8978	18.8468	18.3844	18.464	18.3975	18.5161	18.4588	18.3232	18.4156	18.4131	M1A3D8	Aspartic proteinase nepenthesin-1
18.6444	18.8531	18.8244	18.6583	19.2533	19.2054	19.1237	19.2496	17.8499	17.7879	17.8344	17.6412	17.8615	17.9063	18.0079	18.0079	M1A3D9	NAD(P)H dehydrogenase (quinone)
16.883	16.7958	16.7866	16.8974	16.7775	16.7558	16.6545	16.7193	15.8506	15.6369	15.716	15.8475	15.923	15.7886	15.6684	15.7238	M1A3E1	DOMON domain-containing protein
13.3754	13.6228	13.1511	13.3749	14.1218	13.9576	13.8266	13.974	12.7663	12.9114	13.5879	13.0741	13.0771	12.7538	13.1949	12.8736	M1A3E8	Dirigent protein
15.5126	15.5372	15.4703	15.5766	15.6218	15.5921	15.5519	15.6267	15.8778	15.8181	15.8953	15.829	15.8582	16.0118	15.8488	15.8994	M1A3I7	Progesterone 5 beta-reductase
18.1883	18.2123	18.1698	18.2106	18.2569	18.2408	18.2267	18.2116	18.2512	18.2929	18.2072	18.1701	18.3049	18.3038	18.2842	18.3863	M1A3J1	Rhodanese-like domain containing protein
16.5451	16.452	16.4761	16.5654	16.4708	16.4047	16.4421	16.5522	16.2545	16.4363	16.3365	16.4803	16.4588	16.557	16.4427	16.6195	M1A3J2	Cytochrome b5
13.8607	13.5753	13.9283	13.8681	13.7865	13.7714	13.8156	14.0139	14.1096	14.0139	14.1137	14.1687	13.8061	14.2607	13.9693	14.2246	M1A3M1	Eukaryotic translation initiation factor 2 family protein / eIF-2 family protein
13.3835	13.2676	12.8313	13.2686	13.0546	13.4594	12.3074	12.6622	12.7801	11.637	12.0263	11.9125	12.7845	12.5059	12.9559	11.4766	M1A3P5	Glycine-rich protein
14.2641	14.1774	14.3507	14.259	14.4084	14.309	14.3738	14.4747	14.3193	14.2608	14.231	14.3444	14.1449	14.3829	14.3948	14.1755	M1A3V0	Ubiquitin fusion-degradation protein
17.4567	17.5367	17.4976	17.5304	17.6075	17.4721	17.541	17.6514	17.4435	17.5027	17.4554	17.5587	17.5561	17.6505	17.5909	17.5999	M1A3V3	Complex I-B22
15.5754	15.5721	15.6217	15.6314	15.6711	15.5737	15.663	15.5667	15.5503	15.5426	15.4054	15.451	15.4183	15.4227	15.4886	15.3636	M1A3Z3	Serine-threonine kinase receptor-associated protein
15.7969	15.7267	15.7737	15.7788	15.886	15.8369	15.8256	15.8016	16.2384	16.0431	16.1939	16.21	16.4742	16.4906	16.385	16.4046	M1A3Z8	ADP,ATP carrier protein
16.03	16.039	15.9014	15.8144	15.1788	15.2976	15.0354	15.2019	15.7443	15.5609	15.7657	15.9466	15.3139	15.1546	15.1557	15.1665	M1A423	Aspartic proteinase nepenthesin-1
16.5602	16.4146	16.5017	16.4009	16.4156	16.2225	16.1674	16.3084	15.2156	15.0666	15.244	15.2678	15.19	15.104	15.2057	15.2233	M1A449	40S ribosomal protein S7
17.5349	17.5896	17.4771	17.3971	17.3533	17.2148	17.1734	17.324	17.3592	17.1979	17.389	17.3141	17.0107	17.2348	17.1785	17.2463	M1A456	Histidine--tRNA ligase
11.9743	12.4047	12.6921	12.1336	12.4229	12.5596	12.0208	12.344	12.4942	12.5745	12.4541	12.3542	12.3763	12.345	12.468	12.1668	M1A457	AP-3 complex subunit delta
14.5803	14.249	14.5672	14.5792	14.7368	14.3237	14.6917	14.6673	14.7985	14.512	14.5721	14.7318	14.61	14.6922	14.5635	14.751	M1A466	WD-repeat protein
15.9798	15.813	15.8371	15.8786	15.5616	15.7751	15.4071	15.5389	15.604	15.4534	15.6503	15.749	15.5386	15.4113	15.3364	15.4168	M1A468	Beta-mannosidase
14.197	13.9416	13.9629	14.0027	13.9708	13.5644	13.914	13.9373	14.6405	14.6695	14.7048	14.8696	14.4723	14.4699	14.1371	14.4303	M1A470	ArcA2 protein
14.1417	14.5805	14.1526	14.1829	14.2495	14.5289	14.4129	14.2554	14.2941	14.4773	14.1566	14.1563	14.1863	14.3506	14.2876	14.3354	M1A476	Eukaryotic peptide chain release factor GTP-binding subunit
14.6215	14.4168	14.505	14.4896	14.657	14.5618	14.6177	14.6629	14.6705	14.631	14.5782	14.6138	14.6694	14.5983	14.6372	14.6488	M1A483	T-complex protein 1 subunit delta
14.4535	14.531	14.8668	14.3678	14.024	14.3923	14.859	14.3632	13.8217	13.856	13.8976	13.8336	13.8631	13.9566	14.075	13.5178	M1A489	Uncharacterized protein
16.3545	16.4738	16.4185	16.399	16.6445	16.6777	16.7251	16.614	16.4189	16.4915	16.3661	16.3632	16.5665	16.6061	16.5908	16.5616	M1A4G8	Peptidylprolyl isomerase
16.695	16.6825	16.569	16.6071	16.1085	16.1258	16.1146	16.09	16.333	16.4101	16.3815	16.4032	16.1868	16.1874	16.2978	16.1996	M1A4Q9	Peptidylprolyl isomerase
16.3374	16.2813	16.2647	16.1899	16.1447	16.0913	16.0315	15.9059	16.5554	16.7326	16.5551	16.7795	16.8479	16.6616	16.7309	16.7891	M1A4R1	DNA-binding protein
15.4434	15.5626	15.4678	15.4513	15.5686	15.6058	15.5962	15.5624	15.6125	15.6588	15.6898	15.6346	15.6094	15.6126	15.6333	15.6183	M1A4U3	Amidase
16.5571	16.451	16.4946	16.3295	16.4377	16.4246	16.5099	16.5462	16.4051	16.4742	16.3761	16.3948	16.1338	16.3369	16.3952	16.258	M1A4U4	Aldose-1-epimerase;Aldose 1-epimerase
18.0196	17.9854	18.0571	17.9945	18.3078	18.1557	18.1629	18.1846	17.8841	17.7675	17.8916	17.8531	17.9554	17.9096	18.0234	17.9566	M1A4Z7	Mitochondrial pyruvate carrier
15.2397	15.2385	15.2193	15.1921	15.007	15.1026	15.2549	15.4042	14.9761	14.9518	14.8408	15.3246	14.6925	15.2093	15.0771	14.974	M1A521	Uncharacterized protein
14.7236	14.8932	14.8393	14.7618	14.7615	14.8949	14.9394	14.9712	14.7295	14.7353	14.6286	14.7846	14.6047	14.6312	14.5494	14.6549	M1A551	Calcium-dependent protein kinase CDPK5
17.0208	16.9939	17.0006	17.0306	17.2707	17.1822	17.1978	17.2258	17.0554	16.9968	17.034	17.0376	17.0795	17.033	17.0258	17.0701	M1A554	Vacuolar proton ATPase subunit E
15.1943	15.1482	15.2298	15.2268	15.3611	15.4785	15.2811	15.3317	15.0008	14.8944	14.9313	14.979	15.1081	15.2368	15.0109	14.9469	M1A587	2,4-dihydroxyhept-2-ene-1,7-dioic acid aldolase
16.4257	16.4572	16.4923	16.3017	15.5126	16.4974	16.2828	16.1707	16.0642	16.2003	16.0064	15.9214	15.9836	15.7689	16.0968	16.0805	M1A597	Uncharacterized protein;DUF4033 domain-containing protein
15.7014	15.6361	15.6999	15.6986	15.6772	15.4501	15.5911	15.6038	15.6302	15.546	15.5426	15.589	15.4581	15.464	15.3372	15.4042	M1A5C6	Ribosomal protein
15.4548	15.3779	15.8066	15.5453	16.1708	16.0625	15.6532	15.9149	16.3038	15.7491	16.1373	16.0544	16.3285	16.4103	16.4014	16.1099	M1A5D2	Vesicle-associated membrane protein
20.5081	20.3938	20.1551	20.5519	20.3724	20.4914	20.3602	20.1186	19.5586	19.8421	19.5475	19.6118	19.6858	19.5458	19.0989	19.3172	M1A5E3	16kDa membrane protein
16.3102	16.2083	16.2576	16.0443	15.7343	15.7859	15.4815	15.5608	16.6637	16.7877	16.8117	16.8624	16.6541	16.5434	16.6228	16.6945	M1A5F8	Aspartic proteinase nepenthesin-2
16.1471	16.2302	16.1905	16.1371	16.4502	16.284	16.2768	16.3307	15.9658	15.9616	15.8367	15.8476	15.9968	16.0009	16.0118	16.1025	M1A5G6	Uncharacterized protein
16.1971	16.0626	15.9372	16.0447	15.1306	15.5776	15.1067	15.1235	12.8489	12.3795	12.2373	12.1362	12.9704	11.991	12.7884	12.0161	M1A5Q3	Cysteine proteinase inhibitor;Multicystatin
18.5294	18.5183	18.4846	18.4585	18.6174	18.5893	18.5607	18.626	18.3933	18.2598	18.3289	18.2705	18.3985	18.3248	18.4318	18.449	M1A5X1	ATP synthase subunit beta
16.2864	16.2639	16.3207	16.2991	16.4521	16.4576	16.3674	16.4669	16.7213	16.7338	16.7223	16.7282	16.7768	16.7991	16.7791	16.6939	M1A642	Uncharacterized protein
18.5239	18.6796	18.5588	18.4863	18.7853	18.8075	18.6302	18.7289	18.4477	18.2107	18.3912	18.2708	18.5053	18.4677	18.4796	18.5549	M1A649	Mitochondrial ATP synthase 6kDa subunit
12.2294	12.7939	11.8722	12.6287	12.4205	13.4504	12.4254	11.8092	13.2964	13.5386	13.2467	13.2629	13.5396	13.6238	13.1819	13.3564	M1A672	CYP72A56
16.6969	16.6785	16.6391	16.7151	16.4214	16.4973	16.5	16.5046	16.5805	16.6331	16.562	16.6075	16.4926	16.5121	16.4781	16.4567	M1A687	Uncharacterized protein
15.2316	15.1952	15.2541	15.194	15.1225	15.0994	15.1086	15.1833	14.9463	14.9926	14.919	15.0364	14.889	14.8843	15.0412	15.025	M1A690	Uncharacterized protein
16.4569	16.2706	16.4223	16.4148	16.2449	16.1139	16.2386	16.3621	16.7317	16.5792	16.6771	16.7467	16.5771	16.7567	16.6457	16.6166	M1A6A6	GDP-mannose 3',5'-epimerase
14.6169	14.4796	14.5626	14.5817	14.7028	14.4975	14.5242	14.6859	14.2763	13.7964	14.011	14.1991	14.1074	14.205	14.0707	13.9469	M1A6C0	MAR-binding protein
16.1687	16.1972	16.1838	16.2131	16.0683	16.0492	16.1165	16.1114	16.4287	16.3285	16.4294	16.4329	16.3407	16.3228	16.3367	16.2904	M1A6F4	Threonyl-tRNA synthetase
16.1847	16.1052	16.1768	16.1811	16.2209	16.1763	16.121	16.1604	16.3674	16.3445	16.3178	16.3427	16.3188	16.4162	16.2725	16.4066	M1A6G8	Heat shock protein
15.0112	15.0974	15.0041	14.9589	15.3766	15.1873	15.1641	15.3287	14.7157	14.8233	14.7244	14.7895	14.5846	14.6466	14.8038	14.7357	M1A6H0	Short-chain alcohol dehydrogenase
17.698	17.8222	17.5696	17.6884	17.7604	17.6022	17.661	17.6119	17.6493	17.6428	17.4279	17.438	17.8581	17.6284	17.8631	17.7925	M1A6H3	Chlorophyll a-b binding protein, chloroplastic
15.0583	15.4618	15.0363	15.029	15.4736	15.5434	15.2595	15.2351	15.0149	15.2091	15.009	15.0254	15.099	14.8882	13.9608	15.0636	M1A6I5	Prolactin regulatory element-binding protein
16.1432	16.1272	16.1522	16.1199	16.3133	16.3146	16.3043	16.3303	16.2723	16.2595	16.2536	16.2624	16.3071	16.3214	16.3009	16.2966	M1A6K1	26S proteasome non-ATPase regulatory subunit 3
16.4772	16.73	16.5356	16.5321	16.4438	16.6037	16.4463	16.4716	16.5643	16.7533	16.4094	16.4871	16.5734	16.4492	16.5292	16.4486	M1A6K9	HMA domain-containing protein
14.4351	14.3202	14.5002	14.4507	14.6428	14.6243	14.648	14.669	14.6045	14.6443	14.6538	14.744	14.6914	14.6665	14.6444	14.6955	M1A6L5	Plant synaptotagmin
17.073	17.0888	17.0641	17.0793	17.0695	17.097	17.0847	17.1018	17.2599	17.2506	17.3033	17.2672	17.2969	17.3978	17.2809	17.3535	M1A6L9	Ascorbate peroxidase
15.2728	15.328	15.137	15.0839	14.4152	14.3242	14.272	14.2612	15.4952	15.6621	15.5255	15.4826	15.5966	15.4894	15.4799	15.5505	M1A6N2	Aquaporin
17.7836	17.7471	17.7892	17.7949	17.5256	17.5753	17.5695	17.5938	17.7864	17.7179	17.7635	17.8376	17.668	17.6548	17.6493	17.6154	M1A6N6	Hydroxypyruvate reductase
16.2808	16.3323	16.3391	16.2565	16.0532	15.8512	15.9585	16.0287	15.6892	15.5898	15.5525	15.5376	15.2627	15.0733	15.2252	15.2858	M1A6Q8	Cucumisin
15.1292	15.2174	15.0445	15.1898	15.5154	15.807	15.6582	15.7214	15.0305	14.9867	15.1599	15.084	14.9113	15.1739	14.6107	14.6641	M1A6U3	Leucine-rich repeat family protein
14.4611	14.6128	14.7677	14.6854	14.8722	14.9869	14.9054	15.1018	14.3282	14.1775	14.3841	14.1551	14.5193	14.4127	14.5533	14.604	M1A713	Multidrug resistance-associated protein 2, 6 (Mrp2, 6), abc-transoprter;Multidrug resistance-associated protein 2, 6 (Mrp2, 6), abc-transoprter
15.2256	15.1112	15.1547	15.1936	15.1473	15.1551	15.1461	15.2002	15.2949	15.1221	15.26	15.2448	15.136	15.1001	15.128	15.1516	M1A731	Isoleucyl-tRNA synthetase
15.2022	14.9582	15.0798	15.1405	15.0387	15.1075	15.059	15.1709	12.5053	12.6495	13.3305	12.6339	12.6471	12.1742	12.3237	12.4753	M1A7D8	Flavonoid 3-hydroxylase
14.9417	15.2478	15.0111	14.8455	15.3366	15.4099	15.3209	15.2679	14.9299	15.2641	15.0906	15.0932	15.241	15.1845	15.3749	15.4189	M1A7G9	Ubiquitin-fold modifier-conjugating enzyme 1
13.9151	13.6926	14.0277	13.9945	14.0631	14.1263	14.2531	14.196	14.2647	14.201	14.1936	14.2333	14.3489	14.5526	14.3418	14.4186	M1A7H3	Phosphoglycerate mutase
13.7794	14.3258	13.7881	14.1077	13.482	13.898	13.5328	13.8047	13.6728	13.5632	13.7698	13.7493	13.6011	13.2297	13.4279	13.032	M1A7K0	Serine hydroxymethyltransferase
15.061	14.6278	14.9141	15.0102	14.5319	14.7581	14.6482	14.5324	14.7608	14.6748	14.6433	14.7876	14.7085	14.4826	14.6083	14.581	M1A7L3	Protein brittle-1, chloroplast
16.6559	16.6208	16.6746	16.6371	16.7309	16.498	16.6756	16.7055	16.6979	16.6779	16.7059	16.7272	16.7682	16.6905	16.749	16.7491	M1A7M4	14-3-3 protein
17.0286	17.0435	17.0578	17.0426	17.4363	17.3908	17.4701	17.4369	16.881	16.9766	16.866	16.9956	17.1249	17.1357	17.1473	17.2145	M1A7Q3	Aldo/keto reductase
14.602	15.7427	14.7278	14.7363	14.3384	15.1367	14.4245	13.9909	15.0407	14.8533	14.9495	14.7189	15.2624	15.1137	15.1682	14.6601	M1A7Q8	Histone H2A
13.0986	12.5208	13.1982	12.9238	14.6091	14.2424	14.0916	14.4672	14.4004	14.2167	14.6063	14.6924	15.1225	15.1019	14.8056	15.1546	M1A7Q9	Early light inducible protein
15.9073	15.9868	15.904	15.9237	15.9414	15.7062	15.9626	15.8958	15.1628	15.3774	15.2079	15.2408	15.0777	15.2048	15.1407	15.2757	M1A7S5	1,2-dihydroxy-3-keto-5-methylthiopentene dioxygenase;1,2-dihydroxy-3-keto-5-methylthiopentene dioxygenase
17.1046	17.1067	17.1198	17.1037	16.9844	17.0552	16.9462	16.9065	16.3184	16.1997	16.3685	16.5589	16.6079	16.3749	16.0831	16.2808	M1A7U3	GDSL-like Lipase/Acylhydrolase family protein
17.5458	17.5838	17.4415	17.4525	17.3198	17.6043	17.2211	17.2046	16.936	16.774	16.9148	17.0472	17.1134	16.9049	17.0628	17.0128	M1A7U4	GDSL-like Lipase/Acylhydrolase family protein
15.8412	15.7907	15.737	15.7657	15.6813	15.679	15.6802	15.7108	15.7435	15.7364	15.7246	15.7375	15.6518	15.5921	15.658	15.6522	M1A7X7	Ribosomal protein L28
16.3813	16.4501	16.4511	16.4313	16.1775	16.3418	16.3342	16.1929	16.1325	16.2873	16.3149	16.2049	16.1605	16.0069	15.9102	16.1364	M1A7Z6	Cysteine synthase
16.6928	16.7325	16.7336	16.715	16.8356	16.8146	16.7897	16.8044	16.828	16.779	16.7919	16.7644	16.9443	16.9113	16.9245	16.9798	M1A7Z9	Uncharacterized protein
16.6145	16.5803	16.5094	16.5942	16.3655	16.2957	16.3121	16.3245	16.3184	16.2744	16.3158	16.3122	16.11	16.1535	16.0954	16.1739	M1A828	GrpE protein homolog
16.7044	16.5647	16.5749	16.5884	16.6416	16.5177	16.3036	16.4222	16.7561	16.503	16.7177	16.7766	16.849	16.7281	16.6722	16.7798	M1A854	Alphavirus core protein family
16.31	16.2395	16.224	16.2163	15.9323	15.8714	15.903	15.9716	16.564	16.5761	16.5776	16.5568	16.3156	16.3331	16.3531	16.3448	M1A8C3	Serine/threonine protein kinase
16.91	16.8202	16.8127	16.8459	16.734	16.6271	16.5787	16.7323	16.6902	16.562	16.7201	16.6761	16.5195	16.5537	16.5783	16.6574	M1A8E9	Uncharacterized protein
13.3772	13.7097	13.4455	13.6611	13.1904	13.6735	13.1995	13.51	14.7903	15.0799	14.5984	14.4192	14.1688	13.9226	14.3501	14.1073	M1A8I4	ASR4
15.1539	15.1497	15.2703	15.1098	15.6543	15.4916	15.5328	15.6038	15.0395	15.088	15.1006	15.1476	15.3257	15.5146	15.4924	15.4355	M1A8P1	CXE carboxylesterase
14.5092	14.504	14.6882	14.6678	14.8611	14.4738	14.4288	14.8549	15.3954	15.3749	15.2898	15.3619	15.4576	15.5692	15.5891	15.6027	M1A8S3	DNAJ heat shock N-terminal domain-containing protein
15.0536	15.1875	15.3084	15.1543	15.4644	15.4495	15.4584	15.4577	15.4813	15.5402	15.5398	15.3882	15.9093	15.9413	16.0082	15.9788	M1A8S4	Cold-induced glucosyl transferase
14.0601	14.6057	14.2119	13.7531	13.653	13.7204	13.5245	13.6012	13.9329	13.7561	13.6761	13.6211	13.5865	13.5146	13.7408	13.6376	M1A8Y4	Subtilase
17.6525	17.6512	17.5941	17.6207	17.7023	17.7033	17.6387	17.6539	17.3814	17.3304	17.4093	17.3211	17.3978	17.4069	17.3776	17.3077	M1A8Y5	Uncharacterized protein
16.6672	16.6433	16.5248	16.5993	16.169	16.22	16.1192	16.1757	15.9897	16.0662	16.0233	16.1233	15.5637	15.5833	15.6874	15.6695	M1A920	Uncharacterized protein
16.3286	16.2946	16.2992	16.3323	16.4619	16.3585	16.4461	16.4119	16.5307	16.5488	16.5188	16.5097	16.5101	16.5054	16.5709	16.524	M1A967	CCT-theta
17.2387	17.1654	17.1745	17.2275	16.8373	16.787	16.8615	16.8823	17.0426	17.1018	17.1049	17.0863	16.8168	16.9363	16.8681	16.8665	M1A989	Ribosomal protein
15.4569	15.429	15.4268	15.3603	15.3105	15.441	15.229	15.2811	15.9149	15.9335	15.9924	16.1708	15.7358	15.3851	15.6316	15.6249	M1A997	Uncharacterized protein
19.7141	19.8001	19.6517	19.7174	19.6715	19.7327	19.7442	19.6708	19.5232	19.6411	19.5543	19.4735	19.609	19.5653	19.5973	19.5715	M1A9A1	Subunit A of ferredoxin-thioredoxin-reductase
16.4555	16.543	16.493	16.547	16.7932	16.7958	16.8479	16.779	16.396	16.5103	16.4223	16.4519	16.5247	16.6211	16.4618	16.5169	M1A9C1	ATP synthase subunit O, mitochondrial
16.0849	16.1887	16.152	16.0955	16.1398	16.1806	16.2193	16.1998	15.7935	15.8887	15.8129	15.7782	15.7518	15.7703	15.9323	15.8322	M1A9C3	23 kDa subunit of oxygen evolving system of photosystem II
16.3893	16.4064	16.3538	16.3709	16.5167	16.6421	16.569	16.4864	16.3501	16.5086	16.371	16.3502	16.5757	16.4826	16.4801	16.475	M1A9K6	Protease degQ
16.9402	16.9345	16.9673	16.9893	17.0135	16.9517	16.9726	16.9793	17.3078	17.2042	17.263	17.2555	17.1246	17.1032	17.1542	17.1029	M1A9P1	Glycosyltransferase
16.5448	16.5363	16.6318	16.5618	16.348	16.3605	16.2811	16.4052	16.6912	16.6631	16.7212	16.7176	16.5154	16.4456	16.5856	16.5328	M1A9T7	SET domain-containing protein
16.9645	17.1628	17.039	16.942	16.5425	16.744	16.6317	16.483	16.8065	16.876	16.8212	16.8041	16.6851	16.3175	16.5982	16.6208	M1A9U0	Structural constituent of ribosome
18.006	17.9383	17.9786	17.9456	17.9723	17.6956	17.8278	17.89	17.8597	17.8435	17.8129	17.8441	17.7348	17.7399	17.7273	17.7316	M1A9V7	30S ribosomal protein S15, chloroplastic;30S ribosomal protein S15, chloroplastic
15.2193	15.0215	15.2381	15.1732	15.6659	15.2088	15.3271	15.5033	14.0085	14.1352	14.3032	14.0229	13.3891	13.0485	14.2137	13.8244	M1A9W5	PRIB5 protein
14.4221	14.4092	14.3925	14.294	14.3715	14.7091	14.235	14.5588	14.1231	14.1311	14.1682	14.2447	13.8919	14.2135	14.1214	14.2549	M1A9X2	1-O-acylceramide synthase
17.1287	17.1496	17.1195	17.14	17.222	17.2404	17.1713	17.2449	16.3872	16.3883	16.4296	16.4609	16.4003	16.3732	16.3518	16.325	M1A9Z4	Transketolase
19.2807	19.2784	19.2009	19.1644	18.7658	18.8204	18.7313	18.7588	18.9485	19.0517	18.9281	18.8865	18.7203	18.6772	18.7029	18.6909	M1AA49	50S ribosomal protein L4, chloroplastic
16.8637	16.5941	16.7824	16.6022	16.851	16.6431	16.3928	16.3377	16.7136	16.7727	16.6944	16.1779	16.5876	16.5876	16.7213	16.4577	M1AA53	Glyoxalase II
14.9463	14.8344	14.8057	14.9654	14.8888	14.7391	14.7713	14.6471	14.606	14.4982	14.3621	14.3021	14.5457	14.31	14.5372	14.5747	M1AA62	Chalcone-flavonone isomerase family protein
15.1672	15.1468	15.18	15.1823	15.2587	15.3681	15.2445	15.2343	15.4544	15.6407	15.498	15.551	15.585	15.575	15.6133	15.5537	M1AA65	Ribokinase
15.6244	15.5388	15.6123	15.2626	15.2763	15.2195	15.3276	15.321	15.6041	15.4053	15.4403	15.4567	14.8644	15.0524	14.6377	14.0257	M1AA70	RHM1/ROL1
16.5753	16.4537	16.3857	16.5262	16.1373	15.9195	15.9688	15.9336	15.9197	15.8207	15.8152	15.8441	15.867	15.5657	15.7252	15.8239	M1AA76	50S ribosomal protein L13, chloroplastic
15.7234	15.6432	15.6861	15.6031	15.6664	15.5334	15.5228	15.5361	14.918	14.3736	14.5353	14.7776	14.8861	14.7659	14.9987	14.7994	M1AA90	Epidermis-specific secreted glycoprotein EP1
14.0046	14.0958	14.375	14.3791	14.821	14.5111	14.556	14.5707	15.1713	14.9709	15.1834	15.2335	15.6223	15.6839	15.5982	15.6281	M1AA93	CYP72A58
14.9863	14.777	14.9805	14.8026	14.2863	14.454	14.4373	14.5845	14.3553	14.3035	14.3845	14.4725	13.7151	13.7575	13.3731	13.4935	M1AAA0	Acetolactate synthase
15.8156	15.8815	15.9402	15.9173	15.9579	15.9548	16.0597	16.0646	16.3866	16.3111	16.3493	16.3742	16.6786	16.7083	16.6881	16.6659	M1AAA6	Solanesyl diphosphate synthase
15.4909	15.6525	15.6459	15.7631	15.7171	15.8124	15.9522	15.9022	16.1631	16.2059	16.2788	16.3566	16.4137	16.4294	16.444	16.6504	M1AAB1	Peptide-methionine (R)-S-oxide reductase
15.4421	15.6069	15.2964	15.3491	15.5549	15.6032	15.5337	15.4639	15.3893	15.4364	15.3992	15.4123	15.5289	15.4512	15.3073	15.2924	M1AAD4	Multiprotein bridging factor 1c
17.6952	18.5754	17.626	17.8276	17.518	17.8017	17.3533	17.5082	17.4891	17.5801	17.4114	17.5105	17.8269	17.7106	17.4345	17.6872	M1AAI2	Tonoplast intrinsic protein
18.4359	18.5145	18.4102	18.4461	18.2838	18.3754	18.3479	18.3007	17.8818	18.0055	17.9458	17.9601	17.8838	17.8541	17.8334	17.8166	M1AAI6	Trigger_N domain-containing protein
15.8064	16.0031	16.0077	15.9354	15.9577	15.8814	16.2592	16.2	15.7759	15.8439	15.7494	15.8923	15.6883	15.7396	15.8194	15.6864	M1AAK6	Uncharacterized protein
16.8852	16.9339	16.9217	16.9278	16.8209	16.8368	16.8159	16.796	16.6668	16.6159	16.6286	16.63	16.6698	16.5864	16.6352	16.6127	M1AAL2	Phosphoglycerate mutase
15.1059	14.8446	14.8642	14.7486	14.8945	14.5945	14.7106	14.6338	15.1846	15.3083	15.2704	15.4036	15.1289	15.0645	15.0024	14.959	M1AAM1	UDP-apiose/xylose synthase
17.8108	17.6855	17.657	17.6431	17.5596	17.6368	17.4714	17.5576	17.9726	17.9752	17.9317	18.0783	18.3005	18.175	18.0466	18.1527	M1AAN4	Histone H2B
16.441	16.445	16.4239	16.4638	16.526	16.6678	16.5595	16.5454	16.9588	16.8406	17.0655	17.0496	17.1066	17.0423	17.0507	16.9852	M1AAR1	p-coumaroyl quinate/shikimate 3'-hydroxylase
16.1262	16.0183	16.1796	16.1039	16.3204	16.2485	16.169	16.2359	16.5054	16.3685	16.5901	16.6103	16.7845	16.6524	16.5838	16.6739	M1AAS0	Histone-lysine N-methyltransferase, H3 lysine-9 specific SUVH1
14.8969	14.8753	14.8695	14.877	14.1434	14.1425	14.3769	14.4099	14.1663	14.1399	14.1637	14.2749	13.3905	13.4833	13.5852	13.5119	M1AAS7	Magnesium-protoporphyrin IX monomethyl ester (oxidative) cyclase
14.1762	14.2555	14.3483	14.244	14.3667	14.2371	14.1681	14.2933	13.91	13.5064	13.9862	13.9419	13.8823	13.8682	13.8977	13.9717	M1AAU3	Cytochrome P450
15.049	14.9236	14.922	15.077	14.7334	15.1017	14.8828	14.7925	14.7906	14.8771	14.793	14.8711	14.4569	14.5953	14.4536	14.674	M1AAX9	Xylem serine proteinase 1
15.8157	15.8766	15.8136	15.7955	15.9563	15.9597	15.9078	15.9162	15.5599	15.7619	15.6016	15.6877	15.7189	15.6947	15.8035	15.7647	M1AB35	Isopentenyl-diphosphate Delta-isomerase
17.4508	17.4592	17.4286	17.3948	17.3947	17.4486	17.2648	17.3674	17.4685	17.4017	17.4212	17.4106	17.4443	17.4161	17.4237	17.4608	M1AB44	PII
21.6747	21.7246	21.7236	21.7431	21.5287	21.7464	21.7498	21.7954	20.8734	21.1973	20.8937	21.0214	20.8149	20.8566	20.9867	20.9584	M1AB57	CP12
13.5007	13.5103	13.5364	13.5959	13.7854	13.7234	13.5765	13.7584	13.933	13.9231	13.9093	14.0689	14.0057	14.1023	14.1588	14.1614	M1AB59	Importin subunit alpha
15.6296	15.2572	15.6284	15.4153	15.2509	15.1083	14.9938	15.3125	15.1875	14.5007	14.7689	14.934	14.7907	14.7051	14.5648	14.6496	M1AB98	H/ACA ribonucleoprotein complex subunit 4
16.3351	16.3437	16.3571	16.3829	16.3228	16.2325	16.2736	16.4293	16.2302	16.2311	16.1365	16.1458	16.2342	16.1919	16.2382	16.2207	M1ABB4	Protein TRIGALACTOSYLDIACYLGLYCEROL 2, chloroplastic
16.6563	16.5591	16.4168	16.5372	16.3275	16.341	16.2314	16.1806	14.6336	14.5323	14.539	14.8008	14.6027	14.1224	14.0754	14.2676	M1ABD4	Apyrase 3
15.2204	15.1649	15.2568	15.2258	14.882	14.8623	15.0325	14.8079	14.6791	14.6813	14.7843	14.9174	14.5399	14.7879	14.767	14.6015	M1ABE1	Uncharacterized protein
14.4069	14.4347	14.3617	14.3501	14.7651	14.6513	14.5476	14.6611	14.8914	14.8682	14.8415	14.8804	14.9912	14.8317	14.898	14.988	M1ABF8	Heterogeneous nuclear ribonucleoprotein
18.0216	17.9278	17.9926	18.0419	17.8935	17.9117	17.7933	17.9554	18.1068	17.8643	18.0364	18.037	17.9882	18.2795	18.0333	17.9755	M1ABG7	2-oxoglutarate/malate translocator, chloroplast
14.2509	14.5148	14.2242	14.3931	14.0444	14.4199	14.1823	14.2475	13.9679	13.8957	13.9678	14.1543	14.1374	13.5537	14.1506	14.2408	M1ABG9	Nuclear acid binding protein
20.2514	19.9616	20.2417	20.1013	19.9627	19.6684	19.9483	19.9525	20.6183	20.566	20.5215	20.5011	20.5599	20.8915	20.8071	20.4169	M1ABI3	Chlorophyll a-b binding protein, chloroplastic
16.223	16.1759	16.3	16.1708	16.2106	16.3405	16.214	16.1294	12.6969	11.8091	12.4476	11.5599	12.2149	11.5621	12.1283	11.5016	M1ABJ9	CC-NB-LRR protein
13.779	13.8267	13.7865	13.6723	14.1064	13.8033	13.9818	13.8351	14.2081	14.2082	14.1459	14.1751	14.0161	14.2082	13.8688	14.2001	M1ABL9	Vacuolar protein sorting-associated protein VPS4
16.7165	16.7378	16.646	16.7295	16.4534	16.5586	16.4493	16.4608	16.5332	16.4563	16.5496	16.5152	16.3254	16.4448	16.1587	16.2744	M1ABN2	Aldo-keto reductase
16.7377	16.6019	16.7555	16.8392	16.7072	16.6557	17.0019	16.7959	16.3564	16.7097	16.4641	16.5329	16.3431	16.4824	16.4045	16.5139	M1ABN6	60s acidic ribosomal protein
15.1562	15.2313	15.3197	15.1818	15.507	15.2083	15.0954	15.1462	15.746	15.8471	15.7897	15.6695	15.946	15.9882	15.9316	15.8519	M1ABR4	23 kDa subunit of oxygen evolving system of photosystem II
16.2705	16.2286	16.2933	16.2219	16.4286	16.3582	16.1569	16.2611	16.4016	16.1084	16.2007	16.2352	16.2172	16.2321	16.2445	16.417	M1ABT4	RAB5B
13.4122	13.123	13.2864	13.2548	13.6408	13.4421	13.5012	13.675	13.6311	13.457	13.692	13.5105	13.4979	13.52	13.5855	13.5142	M1ABX1	Phosphoenolpyruvate carboxylase
14.6599	14.5187	14.2531	14.491	14.2984	14.1611	14.3206	14.1517	14.5423	14.4695	14.6461	14.5945	14.2385	14.347	14.1675	13.9933	M1ABY8	Pyruvate dehydrogenase E1 component subunit beta
16.2766	16.1978	16.2522	16.2399	16.0404	16.0075	16.0112	16.0651	16.1976	16.1016	16.2389	16.2289	15.9976	15.9772	15.9326	15.934	M1AC15	Carbamoyl-phosphate synthase (glutamine-hydrolyzing)
14.2733	14.5368	14.4874	14.1122	14.7464	14.6827	14.3862	14.4286	13.4884	13.7255	13.114	13.5389	13.7786	13.5703	13.5463	13.7495	M1AC16	Senescence-associated protein
19.0919	19.1004	19.103	19.0794	18.8856	18.8711	18.8809	18.784	19.0669	19.1116	19.1268	19.0965	19.0675	19.027	19.1143	19.0659	M1AC27	(S)-2-hydroxy-acid oxidase
17.2466	17.2252	17.2665	17.2593	17.3082	17.2235	17.3473	17.329	17.9774	17.9181	17.9381	17.8911	17.9831	18.0886	18.0185	18.0153	M1AC63	Glutathione reductase
15.5121	15.467	15.5174	15.5819	15.3564	15.381	15.3456	15.4552	15.8349	15.7782	15.806	15.833	15.7573	15.8217	15.7677	15.7749	M1AC83	AMP dependent ligase
17.3888	17.3588	17.3614	17.3335	17.3619	17.3071	17.2924	17.3602	17.1793	17.1558	17.1788	17.0985	17.2295	17.1338	17.2086	17.1757	M1AC98	Hydroxyphenylpyruvate reductase
15.1855	15.3393	15.1435	14.9999	15.2176	15.018	14.9418	15.0693	14.8303	14.8295	14.862	14.8403	14.7801	14.745	14.8818	14.857	M1ACD6	40S ribosomal protein S17
15.9056	16.0279	16.0728	15.9541	16.2725	16.1881	16.2739	16.2487	16.19	16.1107	16.1617	16.2155	16.0027	16.1592	15.981	16.0065	M1ACG4	Ubiquinol oxidase
15.9341	15.9016	15.8686	15.828	15.5828	15.724	15.6772	15.7127	15.6668	15.689	15.7197	15.6367	15.4101	15.4031	15.4039	15.416	M1ACI6	Polynucleotide phosphorylase 1
16.3396	16.3087	16.2864	16.2978	16.4036	16.4088	16.3481	16.2432	16.4448	16.4935	16.4916	16.5477	16.5644	16.4573	16.449	16.4456	M1ACK8	Eukaryotic initiation factor 4A-3
14.0503	14.0277	14.2521	13.9073	14.4413	14.3067	14.2586	14.4141	13.7884	13.8255	13.7041	13.87	13.7472	13.8985	13.6894	13.7881	M1ACL9	Uncharacterized protein
16.3522	16.386	16.2232	16.2536	16.0659	16.1654	16.105	16.0929	16.3869	16.4414	16.4543	16.4312	16.3838	16.3545	16.3481	16.3661	M1ACM1	Dihydroflavonal-4-reductase
17.2563	17.2254	17.3158	17.319	17.2798	17.3973	17.4549	17.3778	16.3724	16.4504	16.5542	16.4013	16.3905	16.358	16.2745	16.4027	M1ACN9	Starch-granule-bound R1 protein
17.3248	17.085	17.2156	17.2509	17.184	17.1113	17.1513	17.1851	17.1274	17.0468	17.1017	17.1655	16.9866	17.0637	17.0019	16.9698	M1ACS2	60S ribosomal protein L13a
16.477	16.6425	16.6096	16.279	17.0938	16.2624	16.5792	16.4731	16.0984	16.2054	16.3329	16.1307	16.2504	16.3066	16.2624	15.9899	M1ACS9	Uncharacterized protein
16.1335	16.0959	16.138	16.1269	16.3704	16.3001	16.2786	16.3158	16.1885	16.221	16.166	16.2573	16.2937	16.2873	16.306	16.3051	M1ACT7	S-(hydroxymethyl)glutathione dehydrogenase
13.9336	13.9385	14.3591	13.7264	14.7091	14.5712	14.5383	14.5445	15.2154	15.1158	15.0843	15.0839	15.3827	15.3575	15.484	15.4648	M1ACZ9	2,4-D inducible glutathione S-transferase;2,4-D inducible glutathione S-transferase
18.0638	17.9063	17.7944	17.8745	17.3077	17.1507	17.3835	17.2363	16.8418	16.8418	16.8206	16.9538	16.3797	16.254	16.4564	16.4359	M1AD01	Chlorophyll a-b binding protein, chloroplastic
15.6174	15.6332	15.7157	15.6341	15.8805	15.7989	15.7759	15.9045	16.0565	15.9748	15.9586	15.9027	16.0105	16.1168	16.1042	16.1739	M1AD15	Citrate synthase
13.9931	13.6455	13.9628	13.8334	14.118	13.6445	13.8849	14.2346	11.9522	11.5836	11.9026	12.0828	12.167	12.0691	12.0297	12.3095	M1AD20	Allyl alcohol dehydrogenase
16.2502	16.1343	16.2314	16.2715	16.2906	16.2383	16.3197	16.4335	15.7805	15.5631	15.7466	15.7056	15.8305	15.8894	15.8817	15.8448	M1AD22	Triacylglycerol lipase
16.8502	16.8568	16.8554	16.8498	16.9939	16.9518	16.9825	16.9822	16.7998	16.8347	16.8063	16.8247	16.8621	16.9631	16.9154	16.9422	M1AD29	14-3-3 protein
17.2847	17.2723	17.3079	17.2928	17.391	17.3826	17.423	17.3985	17.1765	17.1745	17.1417	17.1701	17.3066	17.2562	17.2729	17.2792	M1AD62	Neutral leucine aminopeptidase preprotein
14.9693	15.0986	14.6311	14.933	15.1735	15.1032	15.1724	15.053	15.3161	15.341	15.3217	15.2838	15.2785	15.3963	15.3467	15.3171	M1AD90	Elongation factor Ts, mitochondrial
16.185	16.2748	16.2305	16.115	16.3513	16.3269	16.2865	16.3329	15.1693	15.2178	15.1917	15.1976	15.0238	15.1101	15.2631	15.0644	M1AD94	Enoyl-CoA hydratase, mitochondrial;Enoyl-CoA hydratase, mitochondrial
14.9978	14.9667	14.9822	15.1101	14.8297	14.6667	14.7599	14.8278	15.1611	15.1323	15.1569	15.1592	15.0739	14.873	14.9232	15.0445	M1ADA3	Uncharacterized protein
16.473	16.3133	16.3969	16.4017	15.7865	15.8069	15.8328	15.8756	15.9412	16.0097	15.9614	16.0121	15.5785	15.5879	15.6111	15.4779	M1ADA6	Ketol-acid reductoisomerase
14.6255	14.8454	14.7632	14.6502	14.8313	14.7019	14.883	14.8034	14.857	14.7554	14.9299	14.9622	15.1358	15.1158	14.9664	15.0087	M1ADG0	Temperature-induced lipocalin
16.4194	16.41	16.3787	16.3792	16.1119	16.1083	16.251	16.2026	15.9924	16.2442	16.0768	16.2209	15.8955	15.7936	15.9855	16.0298	M1ADI8	Uncharacterized protein
15.1232	14.9422	15.024	14.9818	15.262	15.241	15.2594	15.2471	14.9784	15.0596	14.9249	14.9846	14.9186	15.0299	14.9833	15.0045	M1ADI9	Eukaryotic translation initiation factor 4F / eIF-4F, putative
14.3514	14.0437	14.2889	14.389	14.6434	14.3968	14.6028	14.7379	14.1379	14.097	14.0793	14.152	14.0227	14.1856	14.1872	14.0554	M1ADK1	Calcium lipid binding protein
15.9321	16.0682	16.0339	16.0484	16.3243	16.3491	16.3629	16.3206	16.3211	16.3068	16.2295	16.2172	16.4393	16.4458	16.4296	16.3986	M1ADQ4	Annexin
15.9181	15.9382	15.956	15.8894	16.2743	16.4463	16.3023	16.2688	16.0486	16.0657	16.0504	16.0504	16.0136	16.0053	15.9202	15.912	M1ADR9	Sterol carrier protein 2 (SCP-2) family protein
13.6412	13.6914	14.2846	13.7591	15.2467	14.954	14.7248	14.775	13.7841	12.2118	13.0106	13.1265	13.5985	13.577	13.2973	13.7297	M1ADS0	Alpha-amylase
13.3153	13.9298	13.95	13.7258	14.0479	13.3811	14.0561	13.7664	14.2705	13.8661	14.6412	14.0497	14.1526	14.402	14.3336	14.8256	M1ADW0	Cysteine protease
16.2675	16.176	16.0176	16.2532	16.1678	16.1774	16.3609	16.1505	15.9943	16.2298	16.1174	16.2312	16.1594	16.3298	16.1728	16.2206	M1ADX6	Thioredoxin
15.2464	15.2039	15.1847	15.1436	15.0959	15.1121	15.0828	15.0865	15.1244	15.0552	15.0989	15.0895	15.0298	15.0567	15.05	14.9981	M1ADY4	Protein translocase
16.4993	16.5607	16.6093	16.4772	16.6946	16.6851	16.7448	16.8537	16.0553	16.2522	16.1797	16.1062	16.0703	16.1761	16.4712	16.4309	M1AE00	Uncharacterized protein
17.516	17.5676	17.5486	17.5559	17.6569	17.6924	17.6865	17.6337	17.459	17.5305	17.4198	17.4491	17.5331	17.5522	17.4669	17.4312	M1AE01	26S proteasome regulatory subunit RPN11
15.767	15.8054	15.8049	15.8136	15.9553	15.9745	15.9827	15.8941	15.9336	15.9479	15.9517	15.9879	15.9983	16.1102	16.0633	16.0384	M1AE02	Sorting and assembly machinery (Sam50) protein
15.7205	15.6542	15.6861	15.7439	16.2642	16.122	16.2103	16.3129	15.8303	15.639	15.7898	15.751	15.8189	15.9471	15.8341	15.8448	M1AE23	Protein Z
15.8961	15.8377	15.8606	15.8694	15.7896	15.7673	15.7846	15.7885	15.8704	15.7965	15.8822	15.895	15.8002	15.8167	15.8181	15.8212	M1AE33	GcpE
14.3073	14.3192	14.3257	14.4302	14.3368	14.1435	14.3441	14.5769	14.7261	14.6448	14.7173	14.944	14.5165	14.8078	14.6631	14.7012	M1AE51	Glutaminase
11.8106	12.7589	13.2192	10.7425	10.6736	11.4612	11.9311	12.5085	11.475	12.0233	11.4239	11.9362	10.2657	10.2678	10.9037	11.8059	M1AE54	ABC transporter I family member 10, chloroplastic;ABC transporter I family member 10, chloroplastic
15.7552	15.7706	15.7922	15.8014	15.8098	15.6813	15.8064	15.8286	15.6393	15.4819	15.5684	15.5915	15.5343	15.5438	15.501	15.4519	M1AE64	Proteasome subunit beta
16.3957	16.4569	16.502	16.4514	17.0459	16.8638	16.9958	16.9298	16.2612	16.2197	16.1829	16.0907	16.2566	16.4678	16.3617	16.2729	M1AE74	Lactoylglutathione lyase
14.6787	14.6852	14.6784	14.6834	15.1733	15.1126	15.0834	15.1045	14.5277	14.6255	14.515	14.4754	14.5241	14.5599	14.5153	14.5015	M1AE79	Protein disulfide-isomerase
17.4715	17.4518	17.4855	17.438	17.2786	17.2372	17.2991	17.175	17.8655	17.9657	17.8112	17.9798	18.0636	18.1549	17.9831	18.0051	M1AE81	Major intrinsic protein 2
15.4287	15.4509	15.3876	15.4501	15.7813	15.8448	15.6263	15.6419	15.6068	15.65	15.6003	15.5976	15.5951	15.572	15.4765	15.5714	M1AEB9	Beta-galactosidase
18.8281	18.7183	18.7816	18.8234	18.9315	18.8487	18.9302	18.9455	18.7707	18.7747	18.7774	18.7675	18.7477	18.7804	18.71	18.7272	M1AED5	Elongation factor 1-alpha
14.238	14.0775	14.4403	14.4863	14.7883	14.8459	14.9058	14.8496	14.8414	14.763	14.8501	14.7483	14.7755	14.8089	14.7021	14.8423	M1AED8	ABC transporter family protein
14.8989	14.7367	14.913	14.749	14.925	14.7321	14.6461	14.8089	15.5684	15.6511	15.6412	15.5856	15.6794	15.6276	15.7023	15.6692	M1AEE2	4-coumarate--CoA ligase
14.5057	14.5816	14.55	14.6771	14.9972	14.9133	15.0072	14.9216	14.561	14.5518	14.6356	14.5981	14.6641	14.8336	14.6613	14.647	M1AEF2	L-galactono-1,4-lactone dehydrogenase protein
16.2851	16.3323	16.2716	16.3516	16.5881	16.642	16.4554	16.441	16.4559	16.5158	16.5913	16.5406	16.7307	16.5762	16.5397	16.6108	M1AEH2	Sorting and assembly machinery (Sam50) protein
17.2033	17.1839	17.1888	17.2282	17.2067	17.1247	17.2272	17.2586	17.0404	17.0242	17.0569	17.073	17.0551	17.1112	17.0144	17.0902	M1AEH5	Mitochondrial carrier protein
15.6447	15.6571	15.6452	15.5863	15.595	15.5567	15.5282	15.6142	15.6326	15.5243	15.5033	15.6194	15.614	15.506	15.5417	15.5491	M1AEK1	Inosine-5'-monophosphate dehydrogenase
16.171	16.1615	16.2052	16.2019	16.3948	16.4161	16.4433	16.3908	16.3708	16.3535	16.3826	16.4006	16.4661	16.4014	16.3837	16.4203	M1AEP7	Aminopeptidase
17.2757	17.3068	17.2057	17.2525	17.3716	17.3506	17.3495	17.3297	17.0089	17.2456	17.0626	17.0644	17.1621	17.1211	17.1904	17.2108	M1AEP8	Ran binding protein-1
13.0034	12.4898	12.8712	13.004	12.8815	12.4416	13.0418	12.8412	13.5448	13.5799	13.2891	13.6236	13.4275	13.4054	13.55	13.1395	M1AEQ1	Eukaryotic initiation factor 4A-14
17.112	17.1957	17.1578	17.1311	17.1641	17.1941	17.1493	17.1783	16.9339	16.7682	16.8636	16.8516	16.9317	16.9567	16.9789	16.9804	M1AEX7	Tic62 protein
18.4146	18.4943	18.5211	18.4429	18.7585	18.7538	18.7366	18.7311	18.6689	18.6665	18.6301	18.6054	18.9291	18.9049	18.9416	18.9536	M1AF31	3-beta hydroxysteroid dehydrogenase/isomerase
16.4724	16.5176	16.4377	16.49	16.8893	16.815	16.8554	16.67	16.5886	16.5788	16.5321	16.523	17.0757	16.8459	16.9489	17.0148	M1AF34	3-beta hydroxysteroid dehydrogenase/isomerase
18.5203	18.909	18.685	18.4559	18.642	18.8576	18.9487	18.5311	18.4455	18.7957	18.4541	18.5366	18.5945	18.7079	18.8723	18.7778	M1AF38	Chlorophyll a-b binding protein, chloroplastic
15.6438	15.3722	15.4898	15.4861	14.9889	15.1312	14.9326	14.9604	15.4085	15.3632	15.3749	15.424	15.2649	15.1406	15.2241	15.181	M1AF40	Beta-ketoacyl-[acyl-carrier-protein] synthase I
11.9671	11.879	12.0505	11.9884	12.2979	11.8523	12.0927	12.2015	12.7275	12.3959	12.7166	12.655	12.8671	13.151	12.8212	12.8001	M1AF43	RNA binding protein
17.693	17.7573	17.6101	17.6678	17.7179	17.566	17.5941	17.584	17.4896	17.5133	17.514	17.437	17.4297	17.0529	17.3103	17.4325	M1AF93	28 kDa small subunit ribosomal protein
16.316	16.1372	16.192	16.3284	16.101	15.8593	16.0426	16.1058	16.1396	16.0179	16.2258	16.2337	16.0121	16.2098	16.0455	16.0434	M1AF95	40S ribosomal protein S5
16.4481	16.504	16.5324	16.412	16.6058	16.6373	16.6086	16.5928	16.4521	16.4308	16.4407	16.47	16.9483	16.9185	16.8972	16.8268	M1AFA9	Glutamate dehydrogenase
16.2477	16.0202	16.3289	16.0127	15.4142	15.4626	15.1935	15.5342	15.215	15.2702	15.2231	15.1564	14.6241	14.8522	15.0206	14.1063	M1AFC7	H/ACA ribonucleoprotein complex subunit
16.9043	16.929	16.9061	16.8067	16.7407	16.81	16.7474	16.7258	16.7491	16.7999	16.7891	16.7274	16.7961	16.6632	16.721	16.7024	M1AFI4	Protein kinase domain-containing protein
16.0972	15.9443	15.9647	15.6852	16.3416	16.3173	16.1186	16.4349	13.5889	13.8975	14.2846	12.7265	12.8322	13.367	12.4274	13.5752	M1AFK2	LRR receptor-like serine/threonine-protein kinase
14.7184	14.4593	14.1629	14.4187	14.4115	14.2399	14.309	14.3666	14.369	14.2131	14.2796	14.3514	14.0014	14.3404	14.0318	14.3085	M1AFM6	Mutt domain protein
14.3779	14.4268	14.3097	14.1265	14.5766	14.5784	14.2262	14.251	14.4158	14.3091	14.3857	14.3252	14.39	14.5136	14.3386	14.2969	M1AFN4	ER membrane protein complex subunit 3
15.9404	15.8923	15.6089	15.8063	15.8074	15.7392	15.6149	15.4984	15.8045	15.5432	15.6933	15.6736	15.617	15.6788	15.5245	15.6274	M1AFN7	60S ribosomal protein L6
15.7833	15.8581	15.9221	15.162	15.766	15.8127	15.8223	15.727	15.8099	15.6616	15.5774	15.7399	15.6939	15.4191	15.5802	15.5969	M1AFP3	Protein arginine n-methyltransferase
16.5789	16.3487	16.4181	16.454	16.0704	15.9177	15.8615	16.0728	16.703	16.438	16.5562	16.7815	16.5388	16.6075	16.5023	16.5606	M1AFS5	Chlorophyll synthase
19.4393	19.487	19.4145	19.3755	19.4224	19.433	19.3565	19.3304	19.4585	19.6045	19.418	19.3799	19.5051	19.5486	19.5552	19.4451	M1AFT5	Chlorophyll a-b binding protein, chloroplastic
15.6324	15.5402	15.5023	15.5207	15.4818	15.5824	15.294	15.2102	14.6603	14.8579	14.6304	14.7239	15.1849	15.0949	15.1385	15.2733	M1AFU6	Polygalacturonase inhibiting protein
14.5898	14.7213	14.6637	14.6502	14.6183	14.5463	14.8	14.4411	14.8805	14.5352	14.6743	14.6478	14.8665	14.9127	14.5835	14.7428	M1AFV5	AMP deaminase
15.4775	15.2349	15.6678	15.4171	16.0172	15.9821	15.8634	16.0275	15.1857	15.0454	14.7584	14.8355	15.6705	15.6257	15.5497	15.7377	M1AFW4	Clathrin light chain
14.3486	14.5424	14.5494	14.4954	14.5115	13.9082	14.2845	14.2432	14.77	14.4892	14.4707	14.5051	14.6174	14.3883	14.6791	14.6086	M1AG20	Cryptochrome 1b
14.7749	14.6991	14.6403	14.6019	15.3978	15.6049	15.2557	15.1445	14.2734	14.0605	14.267	14.3726	14.3422	14.233	14.2362	14.1824	M1AG32	Mannan endo-1,4-beta-mannosidase
18.3563	18.3616	18.3193	18.2764	18.3972	18.2815	18.6178	18.4078	18.19	18.2798	18.0748	18.1521	18.309	18.4186	18.3952	18.3651	M1AG46	Chlorophyll a-b binding protein, chloroplastic
17.5336	17.6027	17.5646	17.5377	17.5436	17.5561	17.5611	17.5183	16.9039	16.9769	16.8696	16.9022	17.1406	17.1387	17.1729	17.1755	M1AG57	Peptidylprolyl isomerase
16.5588	16.1458	16.2552	16.4794	17.0856	15.5532	16.0039	16.4448	16.183	15.3105	16.087	15.9944	15.2067	15.8555	15.8914	15.8866	M1AG73	Tryptophan decarboxylase
18.8523	18.9703	18.9357	18.8643	18.8378	18.9813	18.9581	18.8998	18.7867	19.0743	18.8667	18.8647	18.9048	18.8633	18.9621	18.817	M1AG88	Photosystem II reaction center Psb28 protein
15.0827	15.1251	15.1297	15.0854	15.3506	15.2649	15.2778	15.1956	15.2285	15.1949	15.1986	15.2075	15.3721	15.4162	15.351	15.3772	M1AG92	RNA helicase
15.4049	15.5014	15.4755	15.479	15.4998	15.4764	15.5994	15.5113	16.2059	16.2931	16.2587	16.2606	16.4965	16.5279	16.4831	16.4715	M1AGE3	D1 protease
17.5771	17.6159	17.5955	17.6031	17.5606	17.5389	17.584	17.5426	17.5697	17.5737	17.5792	17.5212	17.6586	17.4581	17.6244	17.6368	M1AGG3	Galactose mutarotase
15.72	15.5771	15.6786	15.6848	15.6526	15.5522	15.5666	15.6363	15.762	15.5839	15.7098	15.677	15.7717	15.822	15.8247	15.7008	M1AGG9	Prenyltransferase
13.3809	13.9676	13.886	13.9949	14.2979	14.0665	14.27	14.4968	15.2307	15.2004	15.4366	15.3976	15.3365	15.4902	15.3756	15.4322	M1AGJ4	D-lactate dehydrogenase
13.9759	13.8921	13.9196	13.9369	13.942	13.923	13.9263	14.1654	13.5815	13.4848	13.7111	13.7421	13.6242	13.8701	13.5575	13.6375	M1AGR8	5-methyltetrahydropteroyltriglutamate--homocysteine S-methyltransferase
16.4077	16.4011	16.3261	16.3248	16.5993	16.6724	16.619	16.6064	16.0704	16.227	16.0966	16.0495	16.1105	16.0793	16.0699	16.0076	M1AGU2	Peptidylprolyl isomerase
14.8906	14.9773	15.0011	14.9674	15.4085	15.491	15.4627	15.4869	15.5418	15.476	15.597	15.6247	16.1864	16.2583	16.1901	16.3051	M1AGU4	Oxidoreductase
16.481	16.4624	16.508	16.459	16.7007	16.5766	16.6464	16.6833	16.5653	16.5187	16.5299	16.5494	16.6804	16.6894	16.703	16.6708	M1AGW8	Aconitate hydratase
16.9487	16.9336	17.034	17.0024	17.0218	16.9639	17.0866	17.2442	16.7901	16.9161	16.8507	17.019	16.7508	16.8834	16.8762	16.8428	M1AH14	Ferritin
17.5948	17.4129	17.6988	17.2284	17.3866	17.2724	17.4108	17.564	15.7092	16.0172	15.9775	15.9491	15.2011	15.2266	12.8815	14.0026	M1AH25	Basic 30 kDa endochitinase
17.529	17.5837	17.5635	17.5351	17.4302	17.3998	17.4467	17.4755	17.6752	17.736	17.6502	17.6812	17.6926	17.7311	17.7177	17.6474	M1AH70	NAD-dependent epimerase/dehydratase
15.5305	15.5235	15.6092	15.543	15.4771	15.5046	15.5269	15.5075	15.5128	15.6119	15.476	15.5733	15.608	15.6017	15.5831	15.4852	M1AHA0	Arginine biosynthesis bifunctional protein ArgJ, chloroplastic;Arginine biosynthesis bifunctional protein ArgJ, chloroplastic
15.363	15.3158	15.3508	15.3297	15.4965	15.4757	15.4519	15.3158	15.4446	15.512	15.49	15.4302	15.4862	15.3154	15.3831	15.4238	M1AHA2	Small GTP-binding protein
17.2763	17.3137	17.2598	17.2855	17.2285	17.1898	17.2408	17.2378	17.0897	17.0883	17.085	17.1307	17.094	17.0463	17.0756	17.1157	M1AHA7	Nascent polypeptide-associated complex subunit beta
13.9823	14.2261	13.8436	13.7684	13.9773	14.0505	13.9628	13.9771	13.7851	13.5704	13.5556	13.5436	13.7394	13.5641	10.3351	13.2473	M1AHC2	Sorting nexin 3
16.4574	16.1194	16.5586	16.5096	16.2077	16.2882	16.2774	16.1109	16.3697	16.1051	16.2113	16.3365	16.1113	15.9494	16.3077	16.4038	M1AHD1	Uncharacterized protein
16.1435	16.0646	16.0593	16.0281	15.5963	15.5351	15.5804	15.5558	15.7743	15.7137	15.7808	15.7482	15.4572	15.4898	15.5007	15.4839	M1AHD8	Signal recognition particle protein
14.6932	14.8732	14.4838	14.6608	14.669	14.2136	14.1863	14.5201	14.6584	14.6203	14.5044	14.284	14.6144	14.2315	14.3427	14.6707	M1AHF2	Nucleolar phosphoprotein
16.6714	16.5881	16.6334	16.6244	16.2907	16.0894	16.318	16.4358	16.4211	16.5284	16.4542	16.5139	16.3699	16.428	16.3916	16.3997	M1AHH2	Uracil phosphoribosyltransferase
14.6714	14.8449	14.8037	14.7737	14.9615	14.8443	14.82	14.7159	13.9581	14.1589	14.0359	14.1255	14.0258	13.4675	13.8731	13.9873	M1AHH9	Aldo-keto reductase family 4 member C10
12.4547	12.7412	12.8085	12.5621	11.915	12.172	11.823	11.9785	13.2464	13.1965	13.4564	13.522	12.869	12.737	12.7491	12.9586	M1AHJ1	Tropinone reductase 1
16.8445	16.678	16.6388	16.6934	16.586	16.4821	16.5002	16.5897	16.6637	16.6281	16.699	16.7508	16.5483	16.5742	16.6068	16.5107	M1AHJ7	One helix protein
16.484	16.4275	16.4921	16.4625	16.6309	16.625	16.6256	16.544	16.4466	16.4746	16.4253	16.5029	16.5549	16.4327	16.444	16.5076	M1AHN5	Heat shock protein 70
13.5039	13.713	13.7963	13.6816	14.0232	13.8946	13.6775	13.795	13.6514	13.4369	13.6658	13.5059	13.6726	13.7464	13.8959	13.8528	M1AHP1	UNC93
15.8843	15.764	15.8166	15.7936	15.9499	16.0329	15.9291	15.9691	15.9352	15.8426	15.9441	15.9086	15.8965	15.9432	15.8859	15.9057	M1AHP3	Eukaryotic translation initiation factor 3 subunit A
15.5628	15.6169	15.8582	15.8699	15.3581	15.5765	15.6118	15.1288	16.3247	16.4159	16.2101	16.46	16.5798	16.6775	16.47	16.3463	M1AHQ0	Histone H2A
15.724	15.9783	15.7277	15.9777	15.7157	15.614	15.7293	15.6556	16.4568	16.0938	16.2972	16.2668	16.5888	16.5492	16.4621	16.6559	M1AHU7	Uncharacterized protein
17.3276	17.3127	17.3259	17.2426	17.2077	17.203	17.1497	17.1433	11.8339	12.8386	11.7298	12.7345	12.1452	12.3075	11.9285	12.1667	M1AHY2	Basic 7S globulin 2 small subunit
16.8113	16.9011	16.8215	16.7581	17.3294	17.2102	17.1883	17.1568	16.6966	16.7557	16.6715	16.6875	16.7681	16.7629	16.8062	16.7545	M1AHY9	Aluminum-induced protein
15.1311	15.1556	14.9151	15.0863	15.2024	15.3393	15.3646	14.9928	15.1639	15.37	15.3448	15.4636	15.4636	15.497	15.501	15.6175	M1AHZ0	CONSTANS interacting protein 2b
17.1071	17.1748	17.1332	17.1461	17.3786	17.3762	17.3835	17.3129	16.9011	16.9881	16.8529	16.9328	17.0377	16.997	16.9872	17.0296	M1AHZ8	Glutaredoxin-dependent peroxiredoxin
13.6634	13.5431	13.4085	13.6855	14.5452	14.4143	14.4518	14.4978	13.5975	13.508	13.3425	13.4232	13.5539	13.4926	13.7746	13.488	M1AI12	Chaperone protein dnaJ
14.215	14.0246	14.2622	14.0803	14.4499	13.8698	14.1853	14.4153	14.6219	14.312	14.711	14.6985	14.7703	14.6117	14.5839	14.6976	M1AI35	ATP-dependent RNA helicase;RNA helicase;ATP-dependent RNA helicase
18.1063	18.121	18.1109	18.0999	18.0699	18.0318	18.0767	18.0539	18.222	18.193	18.1945	18.2184	18.2943	18.2833	18.2758	18.288	M1AI49	Glucose-1-phosphate adenylyltransferase
15.4492	15.3031	15.4341	15.2548	15.3876	15.4397	15.4925	15.4817	15.4589	15.4698	15.5087	15.5307	15.4984	15.5431	15.5613	15.2818	M1AI54	Ran GTPase-activating protein 2
15.4589	15.3458	15.2837	15.4269	15.5128	15.4337	15.472	15.6282	15.1239	14.7104	15.012	15.1053	15.1871	15.2778	14.8329	15.1553	M1AI67	Cytochrome c oxidase subunit 5C
14.0238	13.977	14.2495	14.1434	12.7265	12.9621	13.9187	12.2675	13.8246	14.0869	13.9322	14.092	13.6092	13.1016	13.8644	13.2776	M1AI82	4-coumarate--CoA ligase
15.4512	15.3478	15.2256	15.3462	15.2724	15.1032	15.247	15.2798	15.3925	15.1143	15.4218	15.3973	15.3288	15.3018	15.1495	15.2142	M1AID5	Splicing factor 3a
14.7729	14.7951	14.8598	14.7986	14.8612	14.7891	14.834	14.8066	15.0448	15.2075	15.0677	15.1048	15.1173	14.9998	15.0904	15.0724	M1AIE7	Pentatricopeptide repeat-containing protein
15.7638	15.7667	15.7842	15.7592	15.9444	15.8753	15.9415	15.9353	15.8958	15.809	15.7295	15.9002	16.063	16.0625	15.9703	16.0728	M1AIF8	Pom30 protein
14.4105	14.2681	14.4102	14.4808	14.4734	14.3425	14.4681	14.474	14.5131	14.3116	14.4879	14.4398	14.5581	14.4567	14.5081	14.5456	M1AIH5	ATP-dependent peptidase
13.9246	14.1242	14.1502	14.0644	13.9983	14.2543	14.3469	14.2347	14.2744	14.3363	14.2738	14.3292	14.2235	14.3771	14.233	14.2502	M1AIM3	ATP-dependent clp protease ATP-binding subunit clpx
16.2288	16.1244	16.0725	16.0877	15.8013	15.7292	15.7794	15.8227	16.3478	16.2505	16.3685	16.3891	16.2062	16.1213	16.1528	16.2239	M1AIS6	15-cis-phytoene desaturase, chloroplastic/chromoplastic
15.6161	15.3942	15.4439	15.4911	15.1327	14.8073	14.9845	15.1315	15.3815	15.2325	15.2571	15.2454	15.1855	15.1922	15.1242	15.0954	M1AIT2	D-3-phosphoglycerate dehydrogenase
16.7977	16.7722	16.8058	16.7523	16.9894	16.9575	16.8634	16.9249	16.5728	16.5018	16.517	16.5924	16.7273	16.6507	16.7079	16.6368	M1AIV9	Pectinesterase
15.8612	15.9059	16.1017	15.9782	16.1624	16.213	16.3134	16.2788	15.7488	15.739	15.723	15.8893	15.8034	15.9336	15.9222	15.5208	M1AIX7	ATP synthase epsilon chain, mitochondrial;ATP synthase epsilon subunit 1
16.775	16.7079	16.6253	16.5776	17.1776	17.09	16.9216	16.9966	16.9765	16.7643	16.8968	16.9468	17.1174	16.9573	16.9628	16.9906	M1AJ04	Sucrose transport protein
14.7091	14.6285	14.6995	14.5707	14.7358	14.7291	14.7808	14.8996	14.8285	14.6332	14.839	14.678	14.7151	14.6686	14.6807	14.7145	M1AJ12	Uncharacterized protein
14.2568	14.1577	14.0911	14.1465	13.5914	13.5876	13.6868	13.8353	14.2828	14.3117	14.2243	14.5087	13.8301	14.0341	13.9147	13.9959	M1AJ16	Dihydrolipoamide acetyltransferase component of pyruvate dehydrogenase complex
15.5719	15.4476	15.4371	15.4349	15.589	15.4801	15.4548	15.4898	15.4691	15.4635	15.4446	15.4942	15.4491	15.5266	15.4292	15.4565	M1AJ32	Eukaryotic translation initiation factor 3 subunit I
15.6742	15.7108	15.6357	15.6405	15.4323	15.4435	15.4194	15.4	15.4651	15.449	15.5552	15.6309	15.4686	15.3349	15.4401	15.4123	M1AJ37	Tetratricopeptide repeat protein, tpr;Tetratricopeptide repeat protein, tpr
15.2875	15.2105	15.1493	15.2318	15.3804	15.1552	15.31	15.2061	15.353	15.475	15.4465	15.5948	15.5075	15.577	15.6318	15.7622	M1AJ40	Chorismate mutase
15.0857	15.0854	15.0963	15.1194	15.2779	15.1864	15.2034	15.2706	15.0049	15.0329	14.9994	14.9425	15.0252	14.9297	15.0387	15.1704	M1AJA2	Protein MYG1
17.7589	17.6682	17.7498	17.7217	17.4842	17.5659	17.4564	17.5581	18.0791	17.7858	18.0261	18.0967	18.0927	18.1248	18.0906	18.0536	M1AJB4	LrgB-like family protein
16.4693	16.3519	16.4954	16.4286	16.2401	15.8265	16.074	15.9637	15.9844	15.7081	16.1451	16.065	15.7069	16.209	15.9397	15.9509	M1AJC5	Uncharacterized protein
16.7754	16.8428	16.7439	16.7349	16.6084	16.6179	16.5386	16.5914	17.106	17.1394	17.1249	16.9859	17.0573	17.0469	17.0823	17.0702	M1AJD8	Disease resistance protein RGA3
19.937	19.9432	19.9409	19.9244	19.8553	19.8715	19.8881	19.8452	19.9499	19.9601	19.9614	19.9782	19.9833	20.0148	19.9753	19.9283	M1AJF6	Phosphoribulokinase
14.0003	14.0228	13.8678	13.9439	14.498	14.4292	14.2176	14.4206	13.6785	13.6787	13.6623	13.4621	14.0325	14.1439	13.7404	13.0148	M1AJI2	Rhamnogalacturonan endolyase
15.0886	15.0117	15.2044	15.1693	15.3069	15.1562	15.307	15.4578	15.3048	15.2176	15.3113	15.3058	15.5001	15.5754	15.533	15.5989	M1AJK1	NADPH--cytochrome P450 reductase
15.5407	15.4926	15.5159	15.5834	15.4411	15.4713	15.4335	15.4666	15.1283	15.1126	15.1899	15.2909	14.9329	14.9613	14.9232	14.87	M1AJK6	Argininosuccinate lyase
13.5475	13.8373	13.7519	13.6118	13.5647	13.7777	13.6286	13.4438	13.8772	14.2916	14.0093	14.1586	14.219	14.1032	14.0433	14.1083	M1AJL4	Dnajc14 protein
15.454	15.4228	15.2392	15.4344	15.7057	15.7706	15.7485	15.7271	15.4337	15.492	15.6144	15.5269	15.5211	15.4407	15.403	15.5247	M1AJM2	Clathrin coat assembly
15.106	14.9456	15.0606	15.0384	14.905	14.8995	14.9919	15.0047	15.0145	14.8386	15.1238	15.0898	14.8136	15.0263	14.9689	14.7993	M1AJP5	Cysteinyl-tRNA synthetase
14.6457	14.8758	14.824	14.9474	15.0673	14.7779	14.9716	14.9446	15.2511	15.0761	15.1854	15.1973	15.1914	15.3311	15.1637	15.1797	M1AJR7	Aminotransferase family protein
14.932	14.8745	14.9052	14.9379	15.117	15.0758	15.0999	15.0963	15.0512	15.044	15.0812	15.0994	15.1192	15.1584	15.0478	15.0949	M1AJV5	26S proteasome non-ATPase regulatory subunit 2 homolog
17.784	17.8129	17.8283	17.7326	17.9646	17.7604	17.9348	17.8759	17.4146	17.6419	17.4551	17.3498	17.6225	17.7137	17.7831	17.7872	M1AJW5	Fasciclin-like arabinogalactan protein 1
16.8267	16.9701	16.7377	16.8379	16.8187	16.8157	16.6954	16.6614	16.835	16.7324	16.8218	16.8674	16.8587	16.7219	16.7341	16.6949	M1AJW6	GTP-binding protein
14.6591	14.9735	14.923	14.7663	15.2747	15.1475	14.8262	15.0357	14.1983	14.2487	13.6592	14.2404	14.8828	15.0952	14.7963	15.0469	M1AJY3	Cucumisin
16.3445	16.3498	16.3083	16.3844	16.5653	16.5015	16.3534	16.4586	16.1542	16.1883	16.1514	16.2199	16.1731	16.2311	16.0828	16.1501	M1AJZ7	V-type proton ATPase subunit F
18.1398	18.2926	18.1863	17.6775	17.8771	17.6014	17.6335	17.9125	16.9804	17.5998	17.6735	17.8445	17.4594	17.549	17.6305	17.6735	M1AK07	Tonoplast intrinsic protein, alpha (Alpha-TIP)
13.9435	13.9219	13.9634	13.6947	13.6682	13.5205	13.6402	13.745	14.0948	14.0474	14.0507	14.0518	14.0337	13.9771	14.0527	13.8289	M1AK16	Hydroxymethylbilane hydrolyase [cyclizing]
14.9023	14.9906	14.9386	14.9516	14.9735	14.8693	15.0323	15.0083	15.1876	14.9781	15.0978	15.2083	15.1356	15.1785	15.1286	15.2687	M1AK24	Allantoate amidohydrolase
16.6284	16.6292	16.6696	16.6358	16.7116	16.7859	16.7491	16.6873	16.9964	17.093	17.0561	17.1001	17.1864	17.1939	17.1725	17.1469	M1AK55	ATP binding / binding / protein kinase/ protein serine/threonine kinase/ protein tyrosine kinase
15.4156	15.3372	15.5586	15.5073	15.2006	15.052	15.3202	15.2656	14.7323	14.918	14.9243	14.9106	13.7208	14.5083	14.8562	14.6338	M1AKA7	Periplasmic beta-glucosidase
15.7598	15.302	14.9048	15.2982	15.4991	15.6435	15.3218	15.3521	13.8842	13.8514	14.0571	13.7465	13.385	13.7874	12.9575	12.2729	M1AKD0	Glutamine cyclotransferase
14.6279	14.4347	14.1432	13.7802	14.9056	14.6403	14.8219	14.7352	15.2181	15.4007	15.1814	15.1305	14.618	14.8044	14.8258	14.8296	M1AKD9	Heat shock protein 83
19.375	19.1965	18.9951	19.1469	17.5106	17.9387	17.4373	17.5387	15.427	15.7772	15.3537	15.3995	12.8668	12.6289	12.2617	12.9298	M1AKE5	Aspartic protease inhibitor 5;Aspartic protease inhibitor 11;Aspartic protease inhibitor 8;Aspartic protease inhibitor 3 (Fragment);Aspartic protease inhibitor 6 (Fragment)
12.5773	12.5358	10.9401	13.0638	13.4381	12.3835	12.83	13.4604	14.7734	14.784	14.8772	14.747	14.8233	14.9987	14.7066	14.7054	M1AKF2	Glycosyltransferase;UDP-glucose:glucosyltransferase
15.3659	15.4196	15.2869	15.3399	15.3025	15.2776	15.2824	15.2569	15.7142	15.4097	15.7407	15.7457	15.5133	15.6575	15.5584	15.5885	M1AKG1	Structural molecule
15.4608	15.4094	15.3618	15.3868	15.4282	15.6099	15.5314	15.5097	15.1099	15.3084	15.1434	15.2773	15.1448	15.2948	15.3116	15.4305	M1AKL9	SKP1-like protein
14.9026	14.8597	14.8193	14.9529	14.9374	14.9162	14.9945	14.9385	15.2266	15.1511	15.2524	15.2554	15.2612	15.2825	15.2025	15.201	M1AKM2	Xylulose kinase
17.415	17.348	17.3618	17.3852	17.6113	17.5531	17.5321	17.525	17.6627	17.5564	17.5981	17.5525	17.6973	17.65	17.6962	17.7268	M1AKN6	Phospholipase D
16.6655	16.6844	16.6804	16.625	16.6804	16.6173	16.6532	16.6406	16.5852	16.5704	16.544	16.5032	16.6566	16.6638	16.727	16.7299	M1AKN9	Lactoylglutathione lyase
15.8974	16.0153	15.889	15.9627	16.0257	16.0156	15.9363	16.0131	15.7111	15.8461	15.8776	15.7506	15.8608	15.8937	15.682	15.2668	M1AKV0	Uncharacterized protein
17.197	17.2144	17.1452	17.1522	17.2623	17.2267	17.2091	17.2046	16.9512	17.0684	16.9746	17.0499	17.0213	17.0448	16.9556	17.035	M1AKV3	Proteasome subunit alpha type
16.3394	16.4593	16.5231	16.5603	16.8176	16.8921	16.8635	16.8395	16.8726	16.8135	16.9335	16.9655	17.0019	16.9766	16.8943	17.0104	M1AKX9	Pom14 protein
18.0309	17.9767	18.057	18.0536	17.8491	17.8758	17.928	17.9085	17.946	17.9069	17.9445	17.9576	17.7601	17.7415	17.7275	17.6862	M1AL00	Ferredoxin-dependent glutamate synthase 1
14.9577	14.9618	14.8567	14.8624	14.8107	14.6897	14.5987	14.5807	14.8872	14.7881	14.948	14.9026	14.7248	14.5671	14.3727	14.6503	M1AL41	Calcium ion binding protein
15.9255	15.8279	16.02	15.9024	15.9685	15.8751	15.9131	15.949	16.178	16.1291	16.1752	16.206	16.2562	16.2455	16.3104	16.3216	M1AL64	Kinase
15.5586	15.4452	15.5279	15.5194	15.5703	15.4407	15.569	15.5827	15.3944	15.2909	15.3568	15.3994	15.2606	15.3463	15.28	15.178	M1ALA3	Proteasome subunit beta
17.3546	17.316	17.3157	17.3518	17.2782	17.2066	17.304	17.3445	16.9783	16.9637	16.971	17.0255	16.8787	16.8841	16.9332	16.8944	M1ALA6	Ripening regulated protein DDTFR10
15.2026	15.5019	15.4687	15.286	15.2342	15.3145	15.3221	15.3115	14.9214	15.2178	15.2551	15.2002	14.9668	15.1796	15.188	15.0876	M1ALD4	Transporter ATM1, mitochondrial
13.5415	13.88	13.7344	13.7626	14.0951	13.9217	13.7966	13.8632	13.5319	13.1783	13.4801	13.3335	13.3349	13.1053	13.4717	13.1875	M1ALL9	Microsomal prostaglandin E synthase 2
17.7486	17.7718	17.7383	17.721	17.5907	17.5835	17.6222	17.5908	17.6581	17.7235	17.6609	17.6911	17.6566	17.6355	17.6469	17.6399	M1ALR5	FtsH
15.7773	15.8082	15.8669	15.8789	15.7738	15.7392	15.7272	15.8382	15.3635	15.4296	15.5655	15.4949	15.2384	15.3832	15.3367	15.5208	M1ALR7	Uncharacterized protein
17.397	17.3817	17.3914	17.3608	17.5099	17.4489	17.4501	17.4915	17.2732	17.3255	17.2747	17.2179	17.2926	17.2579	17.3639	17.3978	M1ALV1	Peptidylprolyl isomerase
14.5038	14.3285	14.4184	14.373	14.7115	14.5992	14.8234	14.6817	14.2097	14.1891	14.4006	14.3164	14.3702	13.8568	14.1722	14.092	M1ALV3	Dolichyl-diphosphooligosaccharide--protein glycosyltransferase subunit 1
16.0791	15.8197	15.9755	16.0653	15.8712	15.7193	15.9003	16.0678	16.038	15.9159	15.9933	16.1557	16.0607	16.2965	16.0348	16.0843	M1ALV4	Uncharacterized protein
12.3854	12.3728	11.3969	12.1607	12.8135	12.4038	12.2294	12.3399	12.3638	11.9581	12.1896	12.3157	10.5063	12.3902	12.2793	12.3685	M1ALZ1	Alkaline/neutral invertase
14.653	14.8527	14.7337	14.6826	14.7153	14.7823	14.7615	14.7711	14.7529	14.7323	14.7586	14.7538	14.7224	14.769	14.8846	14.852	M1ALZ5	BRCA1-A complex subunit BRE
15.1846	15.2027	15.1895	15.1518	15.9485	15.8007	15.8685	15.8557	14.4644	14.5479	14.5317	14.5398	14.447	14.3442	14.4271	14.402	M1ALZ6	Endoplasmin homolog
16.0367	16.0232	16.0788	16.122	15.6315	15.9712	15.6296	15.1507	15.6855	15.9302	15.8241	15.6213	15.5599	15.7385	15.5754	15.6962	M1AM09	Subtilisin-type protease
16.1378	16.1061	16.0859	16.0356	16.0593	15.9387	15.8878	15.9153	16.1061	16.1015	15.9928	16.1134	16.1699	16.134	16.1501	16.1672	M1AM16	Alba domain-containing protein
17.8717	17.8051	17.8571	17.9381	17.9485	17.968	18.0277	18.0174	18.2874	18.323	18.3129	18.3065	18.1823	18.2549	18.2042	18.2333	M1AM23	CDSP32 protein (Chloroplast Drought-induced Stress Protein of 32kDa)
15.5868	15.5745	15.5477	15.5284	15.2326	15.3857	15.1737	15.1969	15.8393	15.857	15.7484	16.0645	15.7188	15.7071	15.6814	15.6371	M1AM36	Pectinesterase
16.3232	16.3188	16.4721	16.3884	17.1711	17.0058	17.1327	17.0572	17.7712	17.7913	17.6856	17.732	18.43	18.4981	18.3813	18.4293	M1AM40	25 kDa protein dehydrin
14.3857	14.4974	14.3801	14.3314	14.561	14.5679	14.3823	14.5294	14.5109	14.3709	14.5662	14.5305	14.5257	14.5366	14.4711	14.6808	M1AM44	Receptor protein kinase
14.3886	14.3685	14.4775	14.5192	15.4922	15.5332	15.3253	15.2862	15.259	15.0925	15.0053	14.9957	15.3568	15.4261	15.3235	15.4283	M1AM69	1,4-alpha-glucan branching enzyme;1,4-alpha-glucan branching enzyme;1,4-alpha-glucan-branching enzyme
20.5879	20.5871	20.6192	20.6163	20.5761	20.5936	20.6376	20.5711	20.6324	20.6945	20.6762	20.6688	20.6663	20.638	20.6437	20.6312	M1AM94	Glyceraldehyde-3-phosphate dehydrogenase
15.2359	15.0577	15.2394	15.1536	15.3405	15.2033	15.2396	15.208	15.391	15.0912	15.2388	15.3727	15.4511	15.4319	15.2899	15.3244	M1AM98	Hexose transporter
15.4319	15.2913	15.3408	15.3988	15.446	15.2057	15.4478	15.3567	14.7799	14.9888	14.924	15.0785	14.6843	14.9269	14.7529	13.9156	M1AMB4	Cinnamoyl-CoA reductase
13.7619	13.7652	13.8641	13.6947	13.8016	13.7437	13.8662	13.8022	13.5686	13.6424	13.5406	13.7514	13.6197	13.6735	13.7298	13.7924	M1AMG4	Tetratricopeptide repeat-containing protein
20.294	20.3843	20.2467	20.2539	20.211	20.2538	20.2328	20.1872	20.1967	20.3981	20.2359	20.1837	20.2523	20.3079	20.2697	20.1746	M1AMG7	Oxygen-evolving enhancer protein 1, chloroplastic
12.8641	12.7445	13.2428	13.2083	13.7391	13.572	13.7583	13.7464	14.3181	14.4137	14.4485	14.6002	14.6912	14.741	14.5177	14.7044	M1AMJ3	DNA double-strand break repair rad50 ATPase
13.1976	13.2329	12.4557	13.7	14.1268	15.2048	12.7748	12.7046	14.2982	14.4082	14.3318	14.203	14.5628	14.7907	13.6297	14.2536	M1AMR8	Stress regulated protein
15.8526	15.8147	15.9119	15.8238	15.9651	15.8631	15.8979	15.8297	15.5758	15.654	15.5778	15.6236	15.6279	15.6656	15.6834	15.6454	M1AMW1	Fibrillarin homolog
14.6083	14.4867	14.5388	14.567	14.2246	14.2777	14.221	14.3323	14.5454	14.323	14.456	14.6195	14.3217	14.4351	14.3261	14.2268	M1AMX4	Plastid division regulator MinD
17.2696	17.2211	16.9226	17.0524	15.1118	15.5771	15.415	14.1461	12.6385	12.7904	12.6328	12.2703	11.1772	11.7164	10.928	11.4671	M1AMY4	Cysteine protease inhibitor 1
16.0685	14.888	15.6934	15.7966	14.9727	15.686	15.5593	15.6232	15.4069	15.1962	15.0247	15.427	15.082	15.2147	14.8284	12.37	M1AN00	Dolichyl-diphosphooligosaccharide--protein glycotransferase
16.9087	16.7515	16.8505	16.8561	16.7125	16.7842	16.6108	16.7705	16.7065	16.2247	16.6339	16.8535	16.7623	16.7358	16.7304	16.4912	M1AN07	Small nuclear ribonucleoprotein E
16.1571	16.3315	16.1881	16.1511	16.0294	16.2645	16.1112	15.9911	15.7724	16.1478	15.809	15.861	15.7906	15.8353	15.9226	15.8741	M1AN14	HCF106
18.1498	18.0205	17.1138	17.1636	17.205	17.2636	17.2265	17.3756	16.2214	13.7024	12.7929	13.5995	12.1869	12.9945	12.1407	12.7465	M1AN77	Phospholipase A1
14.771	14.7042	14.9135	14.8624	15.3697	15.2917	15.1824	15.2378	15.5315	15.3988	15.506	15.5228	16.1324	16.1139	16.0353	16.142	M1AN84	Alpha galactosidase
17.6416	17.456	17.3756	17.5514	16.5428	16.7614	16.6561	16.7427	16.5739	16.2208	16.5357	16.4449	16.1036	15.9873	16.027	16.1217	M1AN86	Triacylglycerol lipase
15.6159	15.6282	15.6622	15.6492	15.6952	15.6949	15.7195	15.7248	15.7963	15.7549	15.7672	15.7464	15.7774	15.7986	15.766	15.8113	M1AN98	Formylglycinamide ribonucleotide amidotransferase
16.3906	16.2271	16.3468	16.4324	16.2047	16.2664	16.1397	16.2197	16.4905	16.284	16.4773	16.5614	16.5155	16.4809	16.417	16.4902	M1ANE8	Peroxisomal biogenesis factor
18.4257	18.4029	18.2288	18.3284	18.3081	18.2584	18.2686	18.2641	18.1119	18.0811	18.063	18.0725	17.9593	17.8972	17.896	17.9818	M1ANH5	Glycoprotein
16.5032	16.5131	16.4918	16.496	16.1579	16.2272	16.1521	16.163	16.2047	16.207	16.2567	16.2504	15.7205	15.7461	15.6399	15.6477	M1ANJ7	Assimilatory sulfite reductase (ferredoxin)
15.6982	15.7964	15.8205	15.9992	15.651	15.9292	15.6995	15.7071	15.8781	15.8988	15.8328	15.7852	15.6314	15.6632	15.6987	15.8257	M1ANL7	ATP binding protein
16.005	16.1704	16.1082	16.0744	16.55	16.4358	16.441	16.4613	15.9897	16.0863	15.9602	15.9755	16.1149	16.1867	16.0899	16.1137	M1ANN8	Glutathione transferase
16.9478	16.9693	16.8933	16.8228	16.8968	16.7131	16.392	16.7144	15.4376	15.4893	15.4573	15.6148	15.2234	15.143	15.2491	14.8413	M1ANP6	Peptidylprolyl isomerase
14.663	14.4943	14.5885	14.6587	14.6939	14.471	14.7	14.6179	14.443	14.41	14.4206	14.5626	14.3992	14.3686	14.3531	14.4236	M1ANP9	Vesicle-associated membrane protein
17.2124	17.1148	17.1408	17.2243	17.0709	17.0235	17.0252	17.0276	17.3239	17.228	17.2941	17.2604	17.3885	17.3211	17.3305	17.3453	M1ANU6	Sugar transporter
16.8497	16.7571	16.8915	16.8003	16.7724	16.7821	16.8129	16.8063	16.9145	16.9022	16.8766	16.9682	16.7641	16.8145	16.8463	16.8298	M1ANW0	Malate dehydrogenase
13.2705	13.2038	13.0196	13.1238	13.688	13.3474	13.4793	13.4338	13.7715	13.7437	13.7027	13.6019	13.7796	13.5333	13.8057	13.8136	M1AP19	Rubisco subunit binding-protein alpha subunit, ruba
17.5077	17.5723	17.4658	17.462	17.6402	17.7637	17.7463	17.6151	16.8766	16.9224	16.9754	17.0366	17.1422	17.1916	17.3403	17.3523	M1AP59	Thioredoxin I
15.6356	15.4077	15.4325	15.4166	15.5468	15.4944	15.4442	15.6467	15.6719	15.5432	15.553	15.5952	15.861	15.6347	15.6649	15.8068	M1AP61	Probable tRNA N6-adenosine threonylcarbamoyltransferase
14.4753	14.3342	14.4153	14.2975	14.5205	14.4235	14.3927	14.5321	14.4976	14.1259	14.487	14.4997	14.6502	14.6013	14.5438	14.6484	M1AP63	Transitional endoplasmic reticulum ATPase
16.899	16.8926	16.8831	16.8848	16.75	16.5504	16.7524	16.7984	16.6827	16.9247	16.698	16.8836	16.6188	16.5759	16.6994	16.7277	M1AP99	Thylakoid lumen 15.0 kDa protein
16.3432	16.4457	16.3759	16.2878	16.1263	16.208	16.0955	16.1154	16.3925	16.4466	16.4136	16.4338	16.4039	16.3464	16.3893	16.3586	M1APB0	Syntaxin
15.6528	15.6325	15.6686	15.6017	16.5818	16.5784	16.3923	16.4611	13.2259	13.3139	13.1913	13.3145	12.9044	13.1839	12.8448	13.0012	M1APC7	Acidic class II 1,3-beta-glucanase;Acidic class II 1,3-beta-glucanase
15.7144	15.8381	15.8308	15.7204	16.412	16.6205	16.354	16.4801	10.278	11.6454	9.80843	11.4776	11.6245	11.1499	9.937	11.254	M1APC9	Acidic class II 1,3-beta-glucanase
12.3779	12.4032	12.57	12.4347	12.7031	12.7011	12.7117	12.7613	12.4962	12.7047	12.4641	12.6134	12.3803	12.6936	12.6819	12.5321	M1APG1	Protein phosphatase-2c
17.6336	17.5955	17.6016	17.6373	17.3089	17.2493	17.3509	17.3522	17.4373	17.3965	17.4584	17.4539	17.1412	17.2009	17.2178	17.1357	M1APG2	Uncharacterized protein
14.1551	13.7926	14.0953	14.1274	14.347	13.6965	14.2735	14.3911	14.359	13.9541	14.2069	14.1398	14.431	14.3406	14.1493	14.2279	M1APH4	Uncharacterized protein
14.7526	14.9966	14.9063	14.6499	14.1633	14.5657	14.1029	14.5408	13.6848	13.3944	13.5948	13.7919	13.2477	13.4629	13.3754	13.3959	M1API9	CMV 1a interacting protein 1
15.0425	14.9811	15.0982	15.1159	15.2467	15.3389	15.3499	15.276	15.1153	14.7757	15.128	15.1543	15.0932	15.11	15.1604	15.1035	M1APJ5	Acyl-coenzyme A oxidase
11.056	11.1487	11.1934	11.1187	11.1615	11.2667	11.1187	10.969	11.1111	11.1733	11.2097	11.2933	11.2643	11.0157	11.5273	11.4957	M1APN1	PWWP domain-containing protein
16.5894	16.5197	16.754	16.5176	16.4346	16.7276	16.6664	16.6233	15.7437	16.232	16.0702	16.1004	15.8014	15.9403	15.997	15.8478	M1APP3	ATP-dependent Clp protease proteolytic subunit
14.6006	14.6504	14.5874	14.4818	14.9275	14.4982	14.6522	14.6088	14.7112	14.5848	14.6521	14.5915	15.1415	15.1433	15.2054	15.2604	M1APW6	S-adenosylmethionine-dependent methyltransferase
17.3121	17.3446	17.2816	17.3131	17.14	17.2039	17.1693	17.1629	17.1175	17.0409	17.1316	17.1354	17.0895	17.1525	17.0799	17.1328	M1APW9	Pheophorbide A oxygenase
15.3908	15.3074	15.3059	15.0974	15.5532	15.4754	15.4459	15.4784	15.5885	15.5539	15.54	15.6276	15.5401	15.4987	15.5373	15.5226	M1APZ6	AMP-activated protein kinase, gamma regulatory subunit
21.2107	21.2667	21.2066	21.188	21.7303	21.575	21.6446	21.6335	20.9222	21.1993	20.8856	20.9415	21.3035	21.4252	21.4311	21.4656	M1AQ00	Superoxide dismutase [Cu-Zn]
15.7685	15.8403	15.8291	15.8015	16.1122	16.1408	16.0875	16.065	16.0441	16.0938	16.0576	16.0491	16.2255	16.2167	16.2191	16.259	M1AQ24	Methylmalonate-semialdehyde dehydrogenase (CoA acylating)
16.161	16.1861	16.1825	16.2274	16.3825	16.3267	16.3866	16.365	16.376	16.4137	16.4009	16.3849	16.4669	16.4786	16.4696	16.4707	M1AQ30	Heat shock 70 kDa protein, mitochondrial;Heat shock 70 kDa protein, mitochondrial
17.0998	17.1377	17.1169	17.0755	17.0878	17.1198	17.0093	17.0946	17.0443	17.0569	17.0286	17.028	17.1772	17.1458	17.185	17.2104	M1AQ38	23 kDa subunit of oxygen evolving system of photosystem II
17.2695	17.3456	17.344	17.288	17.3779	17.403	17.347	17.3639	17.284	17.3528	17.3001	17.2611	17.3922	17.3477	17.3961	17.3532	M1AQ51	Violaxanthin de-epoxidase
15.9305	15.9253	15.8963	15.9075	15.9044	15.8917	16.0503	16.0592	15.7306	16.0739	15.9387	15.9728	15.8747	16.1523	15.9851	16.0522	M1AQ79	Glyoxalase/bleomycin resistance protein/dioxygenase
13.755	13.9263	14.0542	13.8439	13.8317	14.0406	13.8871	13.9118	13.4763	13.569	13.4935	13.4062	13.19	13.7346	13.5758	13.7776	M1AQC1	ALBINO3 1, chloroplastic;ALBINO3 1, chloroplastic
17.2687	17.2581	17.1697	17.2603	17.3628	17.4983	17.4061	17.3027	17.3799	17.4985	17.5222	17.3887	17.4555	17.3351	17.3299	17.3002	M1AQG0	Chaperonin containing t-complex protein 1, epsilon subunit, tcpe;Phosphoglycerate/bisphosphoglycerate mutase;Chaperonin containing t-complex protein 1, epsilon subunit, tcpe
16.413	16.4593	16.3835	16.434	16.5424	16.4847	16.5871	16.5582	16.1877	16.3196	16.2341	16.2654	16.3572	16.3774	16.3901	16.4158	M1AQH0	D-fructose-1,6-bisphosphate 1-phosphohydrolase
15.2788	15.2116	15.0561	14.9181	15.3071	14.9529	15.012	15.2395	14.845	14.5381	14.8713	14.7186	14.9326	14.8416	14.8463	14.9418	M1AQN7	Secretory carrier-associated membrane protein
16.1806	16.2549	16.1608	16.1582	16.3173	16.4287	16.3677	16.2788	16.1933	16.3689	16.2314	16.2423	16.1842	16.1896	16.2333	16.1072	M1AQQ5	Eukaryotic translation initiation factor 3 subunit L
15.2584	15.2729	15.2292	15.3329	15.2835	15.4904	15.3904	15.3701	15.9256	16.0571	16.0473	16.0581	15.8015	15.7755	15.6619	15.7301	M1AQY2	Cytosolic acetoacetyl-coenzyme A thiolase
15.9623	16.0245	16.0903	15.8998	16.1367	16.1381	16.2348	16.2035	16.1515	16.0519	16.0651	16.097	16.0524	16.1099	16.072	16.1454	M1AQZ1	Pyruvate kinase
14.171	14.299	14.1778	14.1591	13.7981	13.7482	13.8997	13.9009	13.8474	14.3017	14.0667	14.3624	14.0239	14.0132	14.3653	14.4735	M1AR83	Macrophage migration inhibitory factor family protein
15.7013	15.6485	15.7597	15.6436	15.6588	15.734	15.7103	15.7197	15.1219	15.044	14.9299	14.7976	14.8708	14.8502	14.7908	14.8342	M1ARA4	Cytochrome P450 hydroxylase
15.3508	15.3684	15.412	15.3903	15.6743	15.5946	15.6594	15.5755	15.5322	15.5302	15.5213	15.5577	15.6208	15.6004	15.4575	15.5879	M1ARC8	Oxysterol-binding protein
16.0358	15.9894	15.8809	15.807	16.4181	16.0751	16.0266	16.2466	14.6758	14.3677	14.6912	14.6094	14.6827	14.6563	14.6829	14.6815	M1ARE1	Glutathione-S-transferase
14.6799	14.8851	14.8631	14.6658	14.515	14.3437	14.4467	14.4846	14.055	13.8006	14.0451	13.8836	14.1037	14.1473	14.238	13.911	M1ARE5	Soul heme-binding family protein
13.8503	13.984	14.025	13.8615	14.32	14.1758	14.0696	14.1266	14.5002	14.381	14.2328	14.3228	14.6814	14.6791	14.8026	14.8741	M1ARF5	Acyl-CoA dehydrogenase
12.9374	12.6259	12.5064	12.4968	12.8185	12.4164	12.5115	12.5051	12.6861	12.6041	12.6988	12.5356	12.6912	12.7784	12.6276	12.6007	M1ARG9	BCL-2 binding anthanogene-1
16.1385	16.3147	16.0689	16.0531	16.2529	16.1693	16.121	16.1064	15.9254	15.9556	15.9188	15.8645	15.7962	15.4975	15.7757	15.7515	M1ARI1	Uncharacterized protein
16.3229	16.325	16.3389	16.2985	16.2403	16.2179	16.2546	16.216	16.0492	16.1986	16.096	16.05	15.8041	15.7784	15.8449	15.8063	M1ARI7	Phosphopyruvate hydratase
15.433	15.3714	15.4508	15.2878	15.1434	15.0876	15.2504	15.1288	15.0767	14.8424	14.9502	15.0508	14.4052	14.8606	14.8237	14.3376	M1ARJ5	60S ribosomal protein L4/L1
15.9194	15.9949	15.8856	15.8315	15.6503	15.3631	15.4737	15.3336	15.7347	15.6213	15.6804	15.6984	15.4999	15.5091	15.3841	15.6388	M1ARN5	Ribulose bisphosphate carboxylase/oxygenase activase 1, chloroplastic;Ribulose bisphosphate carboxylase/oxygenase activase 1, chloroplastic;Ribulose bisphosphate carboxylase/oxygenase activase 1, chloroplastic
16.7985	16.6039	16.6428	16.6673	16.3824	16.3399	16.4285	16.5095	16.8106	16.762	16.7823	16.9012	16.0379	16.0076	16.0119	15.9278	M1ARQ6	Tubulin beta chain
14.6995	13.958	14.3966	14.5487	15.1953	15.0163	14.8604	15.0141	15.2268	15.2673	15.1316	15.0991	15.1787	15.7175	15.6062	15.7832	M1ARR8	Alkyl transferase
17.6391	17.6427	17.7227	17.6803	17.633	17.6882	17.6637	17.6662	17.8279	17.8077	17.7864	17.8633	17.8471	17.7859	17.8278	17.8085	M1ARW1	NADP-dependent glyceraldehyde-3-phosphate dehydrogenase
17.0148	16.9752	16.7258	16.7351	15.2487	15.5066	15.4703	15.6033	16.5132	16.3178	16.612	16.497	15.1746	14.0944	14.9953	15.3336	M1ARW6	Plastidial delta-12 oleate desaturase
17.5446	17.5556	17.5752	17.4705	17.3349	17.1838	17.2359	14.6248	17.0225	16.9769	17.0724	17.0533	17.0598	16.8325	17.0811	12.1941	M1ARW9	1-acyl-sn-glycerol-3-phosphate acyltransferase
16.7899	16.7113	16.7272	16.8093	16.4848	16.483	16.5772	16.5364	16.5296	16.5306	16.5597	16.5936	16.4	16.526	16.4111	16.422	M1ARZ3	Translation initiation factor IF-3
15.5009	15.5471	15.5455	15.5672	15.608	15.4972	15.5817	15.572	15.678	15.61	15.625	15.6215	15.5986	15.5866	15.6181	15.6446	M1AS10	GDP-L-fucose synthase
16.2952	16.2946	16.1574	16.183	16.3968	16.5082	16.3518	16.3802	16.178	16.3139	16.2898	16.1669	16.2283	16.2575	16.2399	16.2915	M1AS60	Uncharacterized protein
14.843	14.5785	14.6221	14.6575	14.495	14.4734	14.4642	14.6132	14.5377	14.4062	14.4986	14.5508	14.0622	14.179	14.2947	13.9243	M1AS65	Transmembrane 9 superfamily member
14.3499	14.6961	14.6741	14.0927	15.6123	15.4154	15.3074	15.383	15.7419	15.8697	15.7284	15.6367	14.8049	15.1378	14.9734	15.1312	M1AS77	HQT
14.8645	14.849	14.7346	14.9105	14.8249	14.8408	14.8107	14.8647	14.7657	14.7298	14.7914	14.7772	14.4968	14.6726	14.6206	14.6438	M1AS85	Eukaryotic translation initiation factor 4F / eIF-4F, putative;Eukaryotic translation initiation factor 4F / eIF-4F, putative
16.4194	16.3866	16.4172	16.4381	16.6621	16.6439	16.5841	16.5466	16.5089	16.4647	16.4858	16.487	16.5347	16.497	16.4888	16.4908	M1ASA5	V-type proton ATPase subunit H
13.1653	12.9017	12.9701	13.0105	12.9103	13.0615	12.7908	12.8866	13.0796	12.724	12.8034	12.9588	12.6822	12.7365	12.7548	12.4722	M1ASA9	Carboxypeptidase
15.6094	15.5358	15.4516	15.4803	15.0949	14.9899	14.9078	15.0469	15.0031	15.0281	14.9771	15.0262	14.6496	14.6473	14.7238	14.7866	M1ASB9	Eukaryotic translation initiation factor 3 subunit
16.4054	16.3438	16.4028	16.3888	16.4276	16.4028	16.3962	16.4813	16.0204	15.9709	15.9603	16.0225	16.0874	16.0898	16.1254	16.1426	M1ASC8	5'-deoxynucleotidase
15.5283	15.3628	15.5712	15.661	15.4807	15.777	15.6308	15.4338	15.4472	15.7604	15.6726	15.0001	15.5058	15.8393	15.6771	15.4287	M1ASF4	Amine oxidase
16.1325	16.2199	16.2255	16.2298	15.9355	15.9613	15.9284	15.9968	15.733	15.8378	15.8009	16.0515	15.8698	15.8141	15.9334	16.2332	M1ASK1	Uncharacterized protein
16.4832	16.4165	16.4178	16.494	16.2089	16.1905	16.3387	16.3189	16.3472	16.3424	16.3915	16.3539	16.1297	16.2857	16.1424	16.1125	M1ASK9	Coproporphyrinogen oxidase
16.4597	16.5508	16.4585	16.5619	16.2478	16.435	16.4171	16.4315	16.337	16.653	16.3734	16.7088	16.3353	16.5695	16.5183	16.5933	M1ASN1	Uncharacterized protein
16.2863	16.2758	16.4119	16.3643	16.2789	16.2718	16.229	16.1506	17.829	17.7818	17.7752	17.8919	18.3775	18.2687	18.3678	18.3483	M1ASR2	Plasma membrane polypeptide
18.2574	18.2696	18.1518	18.3646	18.1131	18.0388	17.9946	18.1195	18.2642	17.9984	18.0429	17.9952	18.0298	18.1125	17.9998	18.0031	M1ASR5	Thylakoid membrane phosphoprotein 14 kDa, chloroplastic
15.1305	15.1181	15.2841	15.2434	14.6104	15.089	14.7034	14.6688	15.5129	15.4039	15.5117	15.5832	15.5716	15.629	15.5755	15.6663	M1ASS7	Epoxide hydrolase 1
14.6333	14.2408	14.1074	14.2944	14.1096	13.8236	13.9354	14.2295	13.5826	14.2539	13.4965	14.0737	13.8301	14.0169	13.5294	14.01	M1AST6	40S ribosomal protein S21
13.7708	14.0676	13.7526	13.8016	14.36	14.2039	14.2314	14.6428	13.8296	14.1681	14.2958	14.3139	14.4689	14.5015	14.3736	13.9629	M1ASV3	Dihydrolipoamide acetyltransferase component of pyruvate dehydrogenase complex
17.2109	16.5699	17.0125	17.2104	17.3024	17.2194	17.1806	17.355	17.0634	16.6582	17.1192	17.0546	17.1294	17.4903	16.8948	13.3347	M1ASX8	Mitochondrial protein YMF19
14.9725	14.7525	14.9786	15.1589	14.7794	14.6926	14.8143	15.0271	14.8671	14.6333	14.8992	14.9589	14.8141	15.0648	14.8311	14.9629	M1ASY8	DNAJ heat shock N-terminal domain-containing protein
13.922	13.6619	13.6907	13.8324	13.8789	13.7692	13.8183	13.866	14.592	14.3873	14.5181	14.4461	14.3852	14.544	14.5349	14.4604	M1ASZ1	Cold-induced thioredoxin domain-containing protein
16.7703	16.7674	16.7438	16.7348	16.604	16.5785	16.5807	16.6492	16.9586	16.9255	16.9313	16.898	16.8955	16.7866	16.8693	16.8558	M1AT06	Uncharacterized protein;TPR_REGION domain-containing protein
13.9836	13.6134	13.8093	13.7726	13.7623	13.462	13.7213	13.8874	13.2105	13.2804	13.2575	13.4032	13.3897	13.4009	13.2441	13.5144	M1AT14	Thiamine pyrophosphokinase
14.1475	14.1349	14.2625	14.1717	14.8566	14.7092	14.7366	14.8356	14.5385	14.4324	14.5761	14.4706	14.8216	14.8864	14.8848	14.9679	M1AT18	Multidrug resistance-associated protein 2, 6 (Mrp2, 6), abc-transoprter;Multidrug resistance-associated protein 2, 6 (Mrp2, 6), abc-transoprter
16.0473	16.052	16.0448	16.0586	15.9371	15.9619	15.9947	15.9537	16.0049	15.9901	16.0518	16.0607	15.9036	15.9129	15.88	15.9498	M1AT64	Chloroplast protein import component Toc159
17.2441	17.1563	17.0439	17.1874	16.9376	16.7936	17.1731	17.0976	16.6498	16.9546	16.7784	16.9868	16.8766	16.905	16.9095	17.1526	M1AT67	P23 co-chaperone
12.0606	12.4631	12.0601	11.3692	12.6159	12.6886	11.4698	12.1761	15.8611	15.8654	15.8018	15.8622	15.8566	16.0488	15.9447	15.8724	M1AT76	Beta-glucosidase
17.1715	17.0711	17.1171	17.2371	17.1725	17.078	17.009	17.065	17.0937	16.9328	17.1289	17.1358	17.2488	16.8117	17.0772	17.0559	M1AT84	Small nuclear ribonucleoprotein Sm D2
16.6003	16.5604	16.5994	16.5567	16.54	16.567	16.5661	16.6678	16.9071	17.0194	16.9233	17.0517	16.9266	16.9357	17.0019	16.9717	M1AT95	Uncharacterized protein
16.2723	16.0161	16.1385	16.266	16.0445	15.8881	15.9842	16.1387	16.2145	16.0535	16.1894	16.2209	16.0839	16.2237	16.151	16.1892	M1ATA3	Thioredoxin-like 3-1, chloroplastic
15.7283	15.8058	15.7053	15.7185	15.9161	15.8732	15.8257	15.8402	15.6073	15.5916	15.5972	15.5987	15.7026	15.6772	15.6778	15.7386	M1ATB8	Protein translocase
18.3173	18.3951	18.338	18.3135	18.1227	18.2028	18.0874	18.0425	18.3361	18.3757	18.3487	18.4087	18.5338	18.3588	18.4155	18.402	M1ATD0	Enoyl-acyl-carrier-protein reductase
14.1387	14.1809	14.0883	14.1198	14.347	14.2356	14.2339	14.1895	13.9078	13.5505	13.9298	13.8765	13.6772	13.6912	13.5421	13.6739	M1ATE5	Hsp90 co-chaperone AHA1
16.7966	16.7026	16.7153	16.7457	16.7173	16.5811	16.5686	16.61	16.6125	16.4373	16.5831	16.6252	16.482	16.5109	16.4979	16.5003	M1ATE7	60S ribosomal protein L21
13.3652	13.191	13.2831	13.2481	13.5502	13.4658	13.479	13.8537	13.4581	13.1398	13.329	13.4166	13.4235	13.5436	13.5349	13.5329	M1ATJ6	Diphthamide synthase
14.356	14.4582	14.3754	14.1231	14.8094	14.5802	14.6818	14.7058	14.5265	14.6652	14.6987	14.6664	14.6044	14.7405	14.7479	14.3114	M1ATK6	CDC5
16.8648	16.7566	16.8445	16.8284	16.5256	16.5976	16.5743	16.5624	16.7741	16.6331	16.7909	16.7997	16.5146	16.7934	16.5487	16.6691	M1ATK8	Heat shock protein binding protein
14.7916	14.8189	14.6985	14.5803	15.2695	14.8578	14.9723	15.0212	14.8449	14.907	14.9363	14.8907	15.1446	15.0742	14.9906	15.0313	M1ATL9	OCRE domain-containing protein
20.9657	21.0353	20.9715	20.9881	20.9651	21.0035	21.007	20.9561	21.0678	21.1567	21.1125	21.0853	21.0813	21.1078	21.0545	21.1097	M1ATQ7	Glyceraldehyde-3-phosphate dehydrogenase
16.9907	16.8114	16.838	16.9116	16.7013	16.5767	16.7083	16.7532	16.9036	16.8355	16.8874	16.9566	16.0883	16.1426	16.0652	16.0591	M1ATR5	Tubulin alpha chain
15.2846	14.894	14.8588	14.7727	15.1301	14.0514	14.1511	14.4353	15.1734	15.2286	15.5098	15.4605	15.0768	15.4155	14.8125	14.7634	M1ATT2	Serine carboxypeptidase
13.3041	12.9806	13.3619	13.5933	13.3173	13.1583	13.5354	13.0891	13.0042	13.4268	12.6584	12.9582	12.4014	13.0168	12.8763	13.2925	M1ATV9	Transcription factor LIM
15.0036	15.104	15.192	15.1133	15.3102	15.3083	15.2304	15.2306	15.138	15.3127	15.0154	14.8844	15.3578	15.2722	15.2744	15.3449	M1ATX2	Triacylglycerol lipase
16.5913	16.683	16.6153	16.5914	16.592	16.5514	16.5835	16.564	16.6404	16.7083	16.686	16.7286	16.7495	16.6982	16.7135	16.698	M1ATY8	Chaperonin CPN60-2, mitochondrial
17.6517	17.6638	17.6617	17.612	17.8171	17.6463	17.7003	17.7803	17.5021	17.4125	17.5283	17.517	17.5904	17.5154	17.6554	17.6561	M1AU08	NADH-ubiquinone oxidoreductase B16.6 subunit
16.5469	16.3265	16.3338	16.3044	16.3257	16.3096	15.9323	16.2144	16.5228	16.0516	16.3091	16.272	16.5521	16.4565	16.5274	16.599	M1AU11	GDT1 family protein
18.1598	18.3472	18.4067	18.2356	18.1184	18.3507	18.2957	18.1398	18.1923	18.4419	18.2035	18.319	18.3055	18.3453	18.4037	18.2317	M1AU24	Germin-like protein
15.9104	15.8743	15.9585	15.8938	15.9685	15.9085	15.9179	16.0309	15.8076	15.7265	15.8069	15.8231	15.8884	15.929	15.9458	16.0343	M1AU30	NAD(P)-bd_dom domain-containing protein
16.9841	17.0461	16.9579	16.978	17.1385	17.0683	17.1057	17.1011	16.5911	16.7122	16.6163	16.7853	16.7833	16.8548	16.928	16.9161	M1AU78	ATP synthase subunit delta', mitochondrial
14.4584	14.374	14.4967	14.4413	14.8707	14.3004	14.7159	14.6795	14.5564	14.6141	14.5139	14.5715	14.3832	14.549	14.4405	14.0612	M1AU81	Alpha-soluble NSF attachment protein
14.4997	14.4671	14.5364	14.5681	14.9047	14.6173	14.8439	14.9002	15.0903	15.1278	14.9972	15.0617	15.1857	15.3353	15.2475	15.2961	M1AU85	Protein LRP16
15.3943	15.4334	15.3926	15.4193	15.8652	15.6561	15.7253	15.7758	15.6761	15.608	15.5692	15.5704	15.7433	15.7552	15.7582	15.8239	M1AUH9	Universal stress protein family protein
15.3497	15.6095	15.4903	15.2914	15.9495	15.829	15.5841	15.6417	15.2277	15.0607	15.165	14.9397	15.518	15.5066	15.4922	15.4477	M1AUJ0	Alpha-galactosidase
15.1986	15.3208	14.9651	15.0775	14.8379	15.2828	14.7531	14.9189	14.0343	14.3722	14.0438	14.696	14.2362	14.2919	14.1956	14.4438	M1AUM2	2-oxoglutarate-dependent dioxygenase
14.1219	14.1902	14.1622	14.1921	14.9487	14.9088	15.0266	14.9768	14.4912	14.7101	14.5925	14.5079	14.4256	14.6336	14.5101	14.4943	M1AUM4	Uro-adherence factor A
14.8336	14.769	14.9635	14.806	15.2934	15.2356	15.0984	15.3413	14.7654	14.7471	14.9103	14.9812	15.1347	15.3148	15.2197	15.2171	M1AUM6	Gamma aminobutyrate transaminase isoform1
16.6762	16.7909	16.6656	16.7676	16.4616	16.334	16.3602	16.5317	16.4051	16.4999	16.4008	16.4345	16.4691	16.5534	16.4164	16.6791	M1AUN3	Structural molecule
16.0561	16.0832	15.9647	15.9867	16.2796	16.1394	16.0215	16.1128	15.4831	15.1863	15.2977	15.4177	15.527	15.5568	15.5553	15.5086	M1AUQ8	Mitochondrial ATP synthase 6kDa subunit
15.9725	15.8029	15.9323	15.8264	15.8226	15.8831	15.8675	15.7952	16.0751	16.0529	16.1176	16.1016	15.9957	16.0524	15.9618	15.8376	M1AUR0	NAD kinase 2, chloroplastic
13.9846	14.0123	14.1713	14.0292	14.0373	13.8952	14.0518	13.9643	14.2979	14.0651	14.1783	14.238	14.9646	15.0332	14.9952	14.9341	M1AUR8	Vacuolar cation/proton exchanger
15.9989	15.9692	15.8277	15.8435	15.7158	15.5841	15.4842	15.7279	16.5233	16.3057	16.5409	16.5168	16.2863	16.1695	16.1738	16.2456	M1AUT7	Delta(24)-sterol reductase
15.4156	15.5626	15.3216	15.355	15.6935	15.7094	15.4079	15.4377	16.0501	16.1084	16.0919	15.9555	16.0871	16.0118	16.0307	16.1498	M1AUU9	Ferredoxin--NADP reductase, chloroplastic
19.8458	19.8389	19.7616	19.787	19.3735	19.4553	19.3717	19.3816	19.6079	19.6151	19.6195	19.6184	19.4303	19.4106	19.4021	19.3445	M1AUW2	Ribosomal protein S7;30S ribosomal protein S7, chloroplastic
14.7683	15.5188	14.8214	14.3891	13.566	15.1264	14.8362	14.145	14.6473	14.0678	14.5434	14.9496	14.2127	14.7657	14.1716	13.4478	M1AUW5	5'-nucleotidase
16.4129	16.327	16.3366	16.2292	16.2303	16.2228	16.183	16.1545	15.9703	15.912	15.8959	15.9189	15.944	16.0315	16.155	16.0594	M1AUZ3	Rhodanese-like family protein
15.7386	15.7074	15.225	15.7041	15.9389	15.3441	15.8204	14.9503	15.3708	15.3058	15.2145	15.1496	15.6031	15.4416	15.0712	15.3636	M1AV31	Formyltetrahydrofolate deformylase
13.8043	13.7645	13.7887	13.7257	14.0326	14.1097	14.0136	14.0359	13.4753	13.564	13.5656	13.5187	13.5568	13.6539	13.7497	13.4222	M1AV66	Metacaspase 1
15.8866	15.8622	15.8565	15.876	15.984	15.9252	15.905	15.9258	15.7581	15.8156	15.8465	15.8096	15.8256	15.7341	15.7871	15.8234	M1AV72	Nucleic acid binding protein
17.4668	17.2084	17.2949	16.0854	17.0065	16.7051	15.5749	16.4575	16.2182	16.5848	16.2684	16.184	15.9889	15.9677	16.2932	16.2901	M1AVB5	Ferredoxin
16.1332	16.0983	16.1145	16.1119	16.3702	16.3563	16.3435	16.357	16.3377	16.3035	16.3239	16.2802	16.3704	16.3618	16.3166	16.3795	M1AVI1	Cell division control protein
18.4433	18.4745	18.3945	18.4407	18.3004	18.348	18.3365	18.2745	18.2561	18.3761	18.3061	18.3279	18.2552	18.3246	18.1387	18.1242	M1AVJ2	Fructose-bisphosphate aldolase
13.3726	13.1179	13.3508	13.2341	12.6751	12.8037	11.1337	12.2453	12.3975	12.1514	12.4779	12.9014	11.7649	11.0367	11.5891	11.286	M1AVL1	Major latex
13.2869	13.295	13.0909	13.5976	13.095	13.2208	13.208	13.0202	13.5007	13.2178	13.3405	13.4022	13.5561	13.5267	13.5959	13.4097	M1AVT4	Calcyclin-binding protein
16.5769	16.4923	16.5473	16.5607	16.6019	16.7286	16.7502	16.7904	11.6573	11.8115	11.9951	12.0616	11.4842	12.3254	11.1439	12.4201	M1AVU0	Major latex
14.9578	14.8329	15.1092	14.8224	14.819	15.1079	14.6513	14.9793	14.5813	14.8925	15.0319	14.4393	15.0087	14.9049	14.7289	15.0208	M1AVY1	Glutamine-dependent NAD(+) synthetase
17.1271	17.0786	17.025	17.0283	16.9171	16.8952	16.919	16.9058	16.9013	16.8689	16.8808	16.8869	16.7833	16.8514	16.8611	16.9034	M1AW71	2-C-methyl-D-erythritol 2,4-cyclodiphosphate synthase
13.7549	14.0496	13.8884	13.858	13.848	13.856	13.6863	13.7612	13.8369	14.0191	13.9822	13.8828	13.1938	12.7885	13.6213	13.7121	M1AW76	Phosphoglycerate mutase
14.1449	13.9437	14.1027	14.1276	14.4978	14.3714	14.5163	14.4335	14.5018	14.5181	14.5286	14.6041	14.3731	14.46	14.4632	14.4251	M1AW83	Beta-adaptin-like protein
16.7895	16.7393	16.7448	16.7768	16.6813	16.7074	16.7179	16.6808	16.8445	16.7913	16.8849	16.8742	16.8367	16.8477	16.7901	16.8436	M1AW93	Peptidase M1 family protein
14.7547	14.7043	14.7187	14.6588	14.7541	14.8072	14.8266	14.802	14.6537	14.6827	14.6227	14.6988	14.7725	14.7355	14.6798	14.704	M1AWA7	Glutamine amidotransferase
15.862	15.825	15.9039	15.85	15.8132	15.7776	15.8413	15.8064	15.9114	15.8807	15.878	15.8938	16.0079	15.9162	16.036	16.0073	M1AWB9	Gamma-ECS
15.6791	15.595	15.7504	15.6514	15.4037	15.4219	15.5564	15.5227	15.2001	15.1019	15.2427	15.3093	14.9836	15.1829	15.4671	15.415	M1AWD9	Electron carrier
18.553	18.4523	18.4385	18.5341	18.0995	18.1412	18.2184	18.1608	18.3258	18.3013	18.3759	18.3323	18.1446	18.1639	18.0498	18.1309	M1AWE0	PRPL11 (PLASTID RIBOSOMAL PROTEIN L11)
16.4137	16.4291	16.3316	16.3462	16.6246	16.5995	16.5939	16.57	16.5909	16.4769	16.5414	16.523	16.5806	16.5751	16.4993	16.4961	M1AWF5	Purple acid phosphatase
16.4718	16.5023	16.4586	16.4379	16.2133	16.3492	16.3025	16.2435	16.6132	16.6469	16.7146	16.6008	16.5428	16.4638	16.5258	16.5164	M1AWH0	Uncharacterized protein
16.0271	15.9287	16.019	15.9368	16.0752	16.2331	15.7354	16.0078	15.7522	15.367	15.6641	15.5637	16.0553	15.9178	16.0725	15.8326	M1AWH4	Oligopeptide transporter OPT family
14.7242	14.7975	14.6001	14.7277	14.8655	14.87	14.8548	14.8024	14.7143	14.9217	14.6581	14.7539	14.7439	14.704	14.7535	14.6981	M1AWJ1	ABC transporter family protein
15.4397	15.4101	15.4069	15.417	15.7109	15.589	15.6907	15.7217	15.0628	14.9581	15.013	15.0363	14.8775	14.8555	14.9238	14.8706	M1AWJ2	Luminal-binding protein
15.3555	15.3289	15.2985	15.3485	15.4597	15.4107	15.3997	15.4362	15.3788	15.467	15.335	15.4114	15.4621	15.4959	15.4417	15.4251	M1AWK7	26S proteasome regulatory particle non-ATPase subunit 12
15.5834	15.6881	15.54	15.6046	15.4336	15.4434	15.4838	15.5045	15.5653	15.5479	15.5798	15.5281	15.3901	15.4004	15.4905	15.5155	M1AWL7	Uncharacterized protein
13.6408	13.6409	13.7922	13.659	13.6089	13.4562	13.3691	13.626	13.8032	13.8849	13.9074	13.897	13.6689	13.8213	13.6793	13.5415	M1AWM1	Cell division protein isolog
14.6044	14.5816	14.7098	14.663	15.063	15.0132	15.1008	15.074	15.0555	15.0931	15.1141	15.0604	15.2153	15.2647	15.1605	15.2195	M1AWS1	Centromeric protein E
14.9772	15.0223	14.9495	15	14.9509	14.883	14.9402	14.9294	14.9825	14.9906	15.0236	14.9636	15.3065	15.2081	15.2166	15.2859	M1AWS8	Glucose-6-phosphate 1-epimerase
15.9518	15.9937	15.9599	16.1369	16.297	16.3356	16.3384	16.3103	16.5153	16.4057	16.314	16.5412	16.6627	16.7396	16.5435	16.6047	M1AWU2	Reticulon-like protein
16.4304	16.5003	16.4993	16.4104	16.4308	16.4336	16.398	16.4072	16.6677	16.6835	16.6564	16.6451	16.6413	16.6779	16.6922	16.6671	M1AWV2	Monodehydroascorbate reductase
18.5307	18.3861	18.3834	18.355	17.9313	18.0201	17.8078	17.781	18.7557	18.6438	18.7352	18.6911	18.9039	18.8501	18.7812	18.6599	M1AWY0	Aquaporin PIP-type pTOM75
16.5867	16.5993	16.6411	16.6807	16.991	16.95	17.0245	16.9912	16.9212	17.0201	17.0173	17.0094	17.1772	17.2893	17.266	17.2661	M1AWZ7	Glutathione peroxidase
16.7269	16.822	16.741	16.7324	16.7606	16.873	16.8257	16.7191	16.5563	16.6322	16.5746	16.578	16.6582	16.5309	16.636	16.6674	M1AX34	4-methyl-5(B-hydroxyethyl)-thiazol monophosphate biosynthesis enzyme
18.655	18.6725	18.7052	18.7006	18.8246	18.781	18.8617	18.8157	18.6999	18.7973	18.7641	18.751	18.7352	18.8398	18.7621	18.7236	M1AX44	Malate dehydrogenase
18.8279	18.8537	18.7444	18.7547	18.4167	18.4772	18.4581	18.3434	18.5544	18.6397	18.5908	18.6062	18.4176	18.3059	18.3886	18.3933	M1AX56	30S ribosomal protein S20
15.1353	14.9585	15.263	15.1375	15.8366	15.5247	15.6045	15.41	15.24	14.7466	15.1226	14.987	15.2456	15.2524	15.4071	15.2472	M1AX74	Probable bifunctional methylthioribulose-1-phosphate dehydratase/enolase-phosphatase E1
19.4025	19.4123	19.4484	19.4401	19.4381	19.4378	19.4697	19.483	19.3663	19.4618	19.3452	19.461	19.4157	19.4095	19.4976	19.533	M1AX88	Thioredoxin
16.1652	16.1026	16.3031	16.1259	16.5624	16.4168	16.4516	16.4663	15.7774	15.8481	15.6419	15.8584	15.9694	15.9542	15.9534	15.951	M1AXB5	Sodium/calcium exchanger family protein
14.4689	14.9543	14.6038	14.205	15.2982	14.9963	15.1525	15.0267	14.9133	14.9853	14.6583	14.2536	14.9095	14.828	14.9831	14.9236	M1AXD5	Proton pump interactor 1
17.8814	17.9135	18.0246	17.8795	18.1286	18.1056	18.0516	18.0911	17.5948	17.4464	17.7577	17.6488	17.7245	17.5798	17.8044	17.5011	M1AXK7	PGR5 1A, chloroplastic
15.8181	15.7686	15.8042	15.8535	15.7878	15.7044	15.7494	15.8088	15.889	15.7935	15.8585	15.8549	15.7523	15.8084	15.77	15.8225	M1AXS6	Glutamate/malate translocator
15.102	15.1852	15.092	15.0831	15.2353	15.1881	15.1342	15.087	15.3253	15.2335	15.2633	15.2487	15.3309	15.4146	15.2816	15.4293	M1AXT4	Phospho-2-dehydro-3-deoxyheptonate aldolase
17.3114	17.2972	17.3269	17.3154	17.2393	17.2259	17.1541	17.1926	17.426	17.2705	17.3982	17.4166	17.5402	17.4769	17.4875	17.5305	M1AXW2	(3R)-hydroxymyristoyl-[acyl-carrier-protein] dehydratase
15.2767	15.3198	15.3499	15.2513	15.5167	15.395	15.4205	15.4273	15.3203	15.3818	15.3025	15.2479	15.3845	15.4044	15.4976	15.4441	M1AXW6	Protein phosphatase 2c
14.7421	14.7052	14.9021	14.7686	15.0955	15.1181	14.9658	15.0289	14.9588	14.8898	14.9236	15.053	14.9232	14.9455	14.9747	14.8894	M1AXZ2	Erg-1
15.8356	15.8435	15.8478	15.8808	15.8304	15.8636	15.8883	15.8816	15.6711	15.6553	15.6948	15.6801	15.5751	15.623	15.5232	15.5793	M1AXZ6	Chaperone protein DNAj
14.3374	14.5546	14.5201	14.5621	14.6845	14.6268	14.5237	14.5679	14.8913	14.9097	14.8313	15.0861	15.1159	15.1467	15.0315	15.1393	M1AY00	Protein phosphatase 2c
14.7432	14.7167	14.8388	14.7828	16.1654	16.2007	15.993	16.0521	15.3765	15.1798	15.2851	15.384	15.7397	15.6337	15.6421	15.7874	M1AY17	Peroxidase
17.937	18.1574	17.8292	17.8277	17.9472	18.0203	17.8994	17.8031	17.6974	18.0169	17.6297	17.8135	17.9132	17.962	17.7707	17.8701	M1AY18	Chlorophyll a-b binding protein, chloroplastic
19.5446	19.6506	19.6066	19.4386	19.672	19.6263	19.6534	19.6794	19.5057	19.5099	19.3462	19.4498	19.7441	19.7398	19.8958	19.9318	M1AY19	Chlorophyll a-b binding protein, chloroplastic
15.8988	15.977	15.7851	15.8514	16.2064	16.2408	16.2655	16.1021	16.0133	16.0538	16.1902	16.1731	16.024	16.044	16.0679	16.0412	M1AY42	Clostridium pasteurianum ferredoxin homolog
16.5904	16.1291	16.1609	16.013	16.2489	16.1053	16.1501	16.118	16.1943	13.8919	16.0596	15.9882	15.998	16.0039	15.7632	15.9048	M1AY53	ATP binding protein
14.4693	14.6451	14.3483	14.5423	14.543	14.3403	14.4091	14.4078	14.7784	14.7111	14.6258	14.6846	14.7624	14.5834	14.8377	14.8516	M1AY65	Methyltransferase
15.9414	16.0266	15.9402	15.9196	16.2557	16.2624	16.232	16.2089	15.9068	16.0625	15.9386	15.9135	16.1586	16.0998	16.0698	16.1548	M1AY79	Succinate dehydrogenase [ubiquinone] iron-sulfur subunit, mitochondrial
14.0017	14.4211	14.0759	13.9732	14.8235	15.0372	14.9217	15.0879	14.6075	15.0933	14.8956	14.8811	14.9629	14.9038	14.9797	15.2057	M1AY92	Microtubule-associated protein futsch
16.6277	16.6899	16.6	16.6206	16.6934	16.6376	16.4806	16.5911	16.6391	16.6984	16.6593	16.671	16.5823	16.5868	16.6558	16.6046	M1AYA4	GTP-binding 2
15.9315	15.7797	15.8657	15.8742	15.9616	15.8197	15.6653	15.7414	16.0719	15.7994	15.9447	15.9649	16.0222	15.9184	15.9774	15.9422	M1AYB0	3-ketoacyl-CoA reductase 1
13.4252	13.0075	13.2857	13.3128	13.4581	12.9791	13.278	13.4024	13.617	13.6851	13.7353	13.7718	13.5376	13.9089	13.5629	13.6307	M1AYC9	Ran GTPase binding protein
16.6846	16.6123	16.7223	16.7203	16.5219	16.4482	16.5785	16.6181	16.0788	15.9957	16.0465	16.0382	15.9634	16.0451	15.9889	15.9841	M1AYE1	Adenylosuccinate synthetase, chloroplastic
20.2629	20.3771	20.2664	20.2572	20.0127	20.1646	20.0984	20.1292	20.0362	20.3231	20.1711	20.2219	20.0042	20.1272	20.3026	20.2221	M1AYE4	Ribulose bisphosphate carboxylase small chain;Ribulose bisphosphate carboxylase small chain;Ribulose bisphosphate carboxylase small chain;Ribulose bisphosphate carboxylase small chain 2A, chloroplastic;Ribulose bisphosphate carboxylase small chain 2B, chloroplastic;Ribulose bisphosphate carboxylase small chain 2C, chloroplastic
15.5075	15.5516	15.5281	15.493	15.684	15.6063	15.5989	15.5909	15.6157	15.7485	15.6349	15.5622	15.6352	15.6085	15.6504	15.6001	M1AYG3	TCP domain class transcription factor
15.2465	15.2679	15.3576	15.2699	15.3958	15.3045	15.3856	15.3276	15.3809	15.2824	15.3155	15.4007	15.5508	15.5012	15.5019	15.588	M1AYJ8	Calcium-transporting ATPase
15.999	16.1102	16.0279	16.0214	16.4067	16.3706	16.3025	16.3302	16.3126	16.405	16.3312	16.3882	16.3995	16.4016	16.3959	16.4647	M1AYK4	S-formylglutathione hydrolase
14.7317	14.8237	14.7532	14.7076	14.4545	14.5732	14.5519	14.603	14.5491	14.2174	14.464	14.3925	13.8463	14.1767	14.1201	14.0211	M1AYL6	Glucosyltransferase
16.1124	16.0452	16.0623	16.0453	16.2604	16.1113	16.1036	16.0137	15.8704	15.7848	15.8384	15.7137	15.8172	15.7025	15.8114	15.7173	M1AYP7	T-complex protein 1 subunit beta
16.5106	16.4001	16.4506	16.4628	15.9414	16.0267	16.0073	16.0151	16.1393	16.1795	16.1768	16.3202	16.2658	16.2223	16.0579	16.114	M1AYQ6	Fasciclin-like arabinogalactan protein 13
14.5086	14.2637	14.4189	14.2826	14.7435	14.5173	14.2944	14.5042	14.2464	13.8891	13.7035	14.0223	13.6752	14.0497	13.9408	13.7049	M1AYU6	Cytohesin 1, 2, 3
16.0745	16.1457	16.116	16.1477	16.2398	16.295	16.1748	16.2113	16.0176	16.0706	16.0109	16.0711	16.2357	16.1248	16.1436	16.1944	M1AYV2	Uncharacterized protein
15.4296	15.4686	15.5204	15.4585	16.1724	16.0432	16.0818	16.1384	15.5349	15.4266	15.4545	15.4072	15.652	15.8256	15.656	15.6286	M1AYY7	Aminotransferase
15.2069	15.1878	15.1693	15.1623	15.6448	15.5255	15.5514	15.5898	14.5023	14.5592	14.5492	14.5116	14.3859	14.3604	14.3719	14.4175	M1AZ99	Protein disulfide-isomerase
18.6054	18.613	18.5909	18.6128	18.4801	18.4653	18.5073	18.4692	18.5017	18.4964	18.5022	18.5088	18.4761	18.5028	18.4327	18.4324	M1AZB4	mRNA binding protein
13.3656	12.9931	13.1886	13.2716	13.4159	13.4986	13.5068	13.5912	13.8403	13.9718	13.7311	14.0458	14.0204	14.1915	14.1415	14.2437	M1AZD2	14-3-3 protein
16.5682	16.5651	16.6101	16.5981	16.5901	16.6326	16.6232	16.6439	16.6007	16.5336	16.5483	16.5465	16.4904	16.4639	16.4706	16.4139	M1AZE4	Glucose-6-phosphate isomerase
14.6996	14.8146	14.7925	14.5953	14.9006	14.8699	14.8741	15.098	15.2843	15.6278	15.3851	15.5989	15.5154	15.5662	15.5687	15.6249	M1AZE6	Protein CutA, chloroplastic
14.7089	14.6994	14.746	14.6195	14.7623	14.6247	14.6875	14.7472	15.1496	15.1176	15.121	15.2158	15.4326	15.3285	15.4	15.4555	M1AZI7	117M18_4
17.4496	17.5323	17.3593	17.4984	17.0319	17.1004	17.0401	17.2859	17.1304	16.9104	17.1217	17.1932	16.8109	16.8034	17.0118	17.1252	M1AZL5	Plastid-specific 30S ribosomal protein 3, chloroplast;Plastid-specific 30S ribosomal protein 3, chloroplast
16.3546	16.2642	16.2442	16.2527	15.705	15.639	15.658	15.8274	16.0523	15.9582	16.0178	16.0602	15.7559	15.6313	15.7064	15.6935	M1AZL8	Dihydrolipoamide acetyltransferase component of pyruvate dehydrogenase complex
15.919	15.8474	15.9404	15.8648	15.9118	15.9446	15.9498	16.0248	16.0737	16.001	16.042	16.0857	15.9644	15.986	16.0193	16.0147	M1AZM2	Protein phosphatase 2A
13.7844	13.8389	13.8329	13.9279	14.0884	14.0759	14.0209	14.0686	14.1409	13.9623	14.047	14.1842	14.2157	14.1142	14.2118	14.1268	M1AZN8	ER membrane protein complex subunit 1
15.971	15.7624	15.7958	16.137	15.6085	15.5875	15.4548	15.4864	13.5894	13.8837	13.6198	13.5069	13.7596	14.1637	13.9614	13.802	M1AZP7	Threonine dehydratase
19.0601	19.1224	19.2811	19.0281	19.1469	19.4429	19.2232	19.1327	18.6386	18.8065	18.6619	18.7887	18.5206	18.7172	18.6659	18.6047	M1AZT7	Germin-like protein
14.3596	14.4333	14.5319	14.1351	13.9956	14.1066	14.0221	14.1841	14.926	14.6401	14.6738	14.9242	15.0989	14.9678	15.1455	15.2558	M1AZV2	Sigma factor sigb regulation protein rsbq
14.6866	14.6913	14.8115	14.7048	14.8701	14.7005	14.7079	14.8606	14.6524	14.5642	14.7123	14.5952	14.4475	14.4006	14.379	14.3392	M1AZW1	Calcium-transporting ATPase
16.0319	16.1481	16.1025	16.03	16.2905	16.2016	16.1897	16.271	15.7042	15.7761	15.6539	15.6338	16.0107	15.8671	15.9923	15.9149	M1B007	Protein-serine/threonine kinase
15.0632	15.106	15.0642	14.9559	15.147	15.0788	15.0784	15.1056	14.9554	14.9191	14.9231	15.0223	14.9721	14.893	15.0245	14.9633	M1B024	GTP-binding protein
16.0881	16.1062	16.0862	16.1237	16.1999	16.2276	16.1934	16.245	16.0898	16.0491	16.105	16.0114	16.0096	15.9856	16.0243	16.0108	M1B054	Leucyl-tRNA synthetase
15.6792	15.785	15.6783	15.7759	15.6536	15.789	15.6663	15.68	15.6968	15.7506	15.7287	15.7894	15.53	15.6798	15.6261	14.5355	M1B083	Uncharacterized protein
13.1538	12.8851	12.9033	12.8871	12.9964	13.3294	12.7917	13.2845	13.1647	12.9571	13.0945	12.0931	12.6637	12.8977	12.254	12.5409	M1B0A5	PCI domain-containing protein
15.4913	15.481	15.5733	15.6216	16.4004	16.7369	16.44	16.4271	15.2662	15.5223	15.4137	15.4082	15.8968	15.9854	16.118	16.07	M1B0E5	DUF26 domain-containing protein 2
14.6314	14.5481	14.5443	14.4447	14.9951	14.9151	14.9449	14.8654	15.2946	15.2594	15.3974	15.5039	15.7909	15.7712	15.4633	15.7666	M1B0M9	Glutamine synthetase
13.8906	14.232	14.4496	14.2137	14.3779	14.5851	14.567	14.6786	14.2799	14.4314	13.8716	14.2816	13.7663	13.9893	13.9601	13.1519	M1B0S5	Uncharacterized protein
15.2665	15.2185	15.1124	15.3533	15.1728	15.1746	15.369	15.296	15.637	15.5298	15.6884	15.7249	15.6752	15.5356	15.6567	15.656	M1B0T1	Oxidoreductase
15.4835	15.164	15.0877	15.0957	14.7977	14.2473	14.5508	14.3616	15.0425	14.689	15.0014	15.0707	15.3354	15.1409	15.1422	15.1383	M1B0T9	Short-chain dehydrogenase
15.3833	15.3878	15.4468	15.3813	15.6314	15.417	15.4756	15.5235	15.3427	15.2051	15.3092	15.3819	15.3831	15.5003	15.4471	15.4397	M1B0U2	Mitochondrial pyruvate carrier
15.3233	15.4364	15.2838	15.2895	15.2463	15.442	15.3549	15.2812	15.0809	15.2911	15.1399	15.108	15.2542	15.2064	15.1436	15.1919	M1B0U3	5'-phosphoribosylglycinamide transformylase
16.4091	16.2637	16.2709	16.3318	16.2738	16.1959	16.1362	16.2593	16.2584	16.153	16.2623	16.2804	16.171	16.2978	16.1048	16.1816	M1B0U4	60S ribosomal protein L6
16.0763	16.1573	16.1654	16.0477	16.2424	16.2811	16.2985	16.1797	16.2437	16.2136	16.1798	16.2716	16.3735	16.3364	16.4292	16.2547	M1B0U7	Fumarylacetoacetase
15.3777	15.4809	15.3063	15.3469	15.2648	15.2363	15.258	15.2483	14.9713	15.1269	15.0332	15.0995	15.0646	14.8302	14.8838	14.9921	M1B0W9	Inositol-1-monophosphatase
15.4065	15.3863	15.5195	15.4084	15.535	15.5004	15.3433	15.5287	15.4347	15.2181	15.5122	15.5716	15.3802	15.4508	15.3317	15.1657	M1B0Z5	Oligopeptide transporter OPT family
16.0352	16.0606	16.0519	15.8581	16.0314	16.0337	15.9812	16.1357	16.0054	15.986	16.0034	16.157	15.5785	15.8697	15.5108	15.4987	M1B143	Transmembrane 9 superfamily member
16.1695	16.1218	16.178	16.19	16.7039	16.4962	16.6222	16.679	16.3276	16.2715	16.31	16.281	16.1841	16.2914	16.2335	16.2672	M1B144	Glutamate decarboxylase
17.9086	17.9135	17.946	17.9584	18.0033	17.9992	18.0447	18.0441	18.2823	18.2947	18.2715	18.2352	18.2486	18.2499	18.2281	18.2412	M1B150	UTP--glucose-1-phosphate uridylyltransferase
13.9661	13.8902	14.0674	13.9782	14.1187	14.0321	13.8662	14.0704	14.0099	13.7983	13.9294	13.7774	13.7412	13.9282	14.0213	13.8446	M1B168	Isoleucyl-tRNA synthetase
15.9112	15.8044	15.9787	16.0766	15.7063	16.0323	15.5295	15.5572	15.757	15.3584	15.7506	15.6761	15.4427	15.6644	15.5751	15.5937	M1B177	Uncharacterized protein
15.2032	14.7865	15.1162	14.5433	15.203	14.3794	14.8414	13.9848	14.974	14.8488	14.9408	15.0086	14.6668	14.8112	14.872	14.3998	M1B196	67kD chloroplastic RNA-binding protein, P67.1
16.0318	16.3272	16.0682	15.9722	16.1333	16.3244	16.1183	16.1081	15.4773	15.1958	15.4555	15.2226	15.5396	15.4141	15.3921	15.1579	M1B1A6	Ste24 endopeptidase
18.828	18.8033	18.8262	18.8265	18.898	18.8348	18.7594	18.8139	18.9859	18.7624	18.8809	18.8928	19.1037	19.0734	19.0528	19.0723	M1B1C5	37kDa chloroplast inner envelope membrane polypeptide
17.8733	18.1034	17.6157	17.7473	17.8126	18.016	17.691	17.656	17.6684	17.9632	17.6751	17.6895	18.0173	18.1761	17.8041	17.8718	M1B1G7	Chlorophyll a-b binding protein, chloroplastic
16.5857	16.6665	16.3378	16.4474	15.7315	15.9028	15.7767	15.722	15.437	15.7375	15.696	15.546	15.0862	14.883	14.9421	14.8018	M1B1I3	GDSL-lipase protein
16.3838	16.3969	16.3705	16.4618	16.2652	16.2498	16.3616	16.335	16.316	16.3207	16.419	16.3638	16.1056	16.1934	16.0284	16.0757	M1B1K8	Sulfate adenylyltransferase
14.933	15.0378	15.021	15.0518	15.0147	15.0771	15.1082	15.0467	14.9773	15.0509	14.999	15.0811	14.9606	15.0781	15.0251	14.9032	M1B1L7	Acylamino-acid-releasing enzyme
15.8843	16.0087	15.5517	15.6798	15.8277	16.0793	15.6383	15.7054	15.6086	15.6438	15.4725	15.662	15.4885	15.6006	15.6651	15.5755	M1B1N0	Heterogeneous nuclear ribonucleoprotein 27C
16.9646	17.0068	17.0487	16.9855	16.3408	16.1739	16.1546	16.2584	16.8258	16.7748	16.723	16.786	15.9023	16.1881	15.9302	16.0334	M1B1N3	3-isopropylmalate dehydratase
17.8042	17.7453	17.7136	17.756	17.8048	17.7222	17.8358	17.6878	17.7492	17.7176	17.7122	17.8183	17.8095	17.7782	17.6765	17.7533	M1B1W6	ADP-ribosylation factor
14.0161	14.081	14.2194	14.1449	14.4458	14.5156	14.2913	14.2465	15.3259	15.1967	15.2118	15.2156	15.7685	15.7877	15.7549	15.7194	M1B216	Sucrose synthase
19.898	19.907	19.9534	19.9239	20.0406	20.0563	19.9979	20.0137	20.0128	20.1067	19.9696	20.0077	20.1375	20.1599	20.2333	20.239	M1B225	Thioredoxin-dependent peroxiredoxin
14.9328	15.1891	14.9361	14.7349	14.1706	14.305	14.5099	14.4201	14.2777	14.6834	14.4873	14.5008	13.9058	13.9479	14.0483	13.8863	M1B234	Pyruvate dehydrogenase E1 component subunit alpha
16.7474	16.9122	16.7464	16.6691	16.6866	16.6929	16.6618	16.5793	16.4456	16.6908	16.4951	16.6597	16.6057	16.7021	16.5641	16.6138	M1B248	Eukaryotic translation initiation factor 3 subunit K
15.015	14.8647	15.0188	14.9314	14.8156	14.8193	14.8365	14.9432	15.007	15.042	14.9816	14.9138	14.851	14.788	14.7023	14.6928	M1B260	Beta-ketoacyl-[acyl-carrier-protein] synthase I
17.9131	18.0026	17.9259	17.9033	18.122	18.1299	18.0522	18.0418	17.789	17.7285	17.8013	17.767	17.917	17.9055	17.8798	17.8986	M1B274	ADP,ATP carrier protein
17.7736	17.8862	17.7329	17.7642	17.8461	17.917	17.8983	17.8467	17.1691	17.2333	17.1392	17.0893	16.9949	17.0164	17.1121	17.1654	M1B2B4	Grx_S14-glutaredoxin subgroup II
15.4207	15.3539	15.4982	15.6877	15.052	15.6039	15.28	15.5936	15.6671	14.7147	15.42	15.4625	15.262	15.5135	15.4263	15.1157	M1B2B6	Protein transport protein Sec24
15.4549	15.5243	15.3295	15.3854	15.5202	15.5953	15.3799	15.4421	15.4129	15.5617	15.4009	15.5033	15.529	15.5648	15.5381	15.6276	M1B2B9	Thioredoxin reductase
18.073	18.048	17.9229	17.9951	18.1637	18.1543	18.0764	18.1033	17.8915	17.7992	17.982	17.9125	18.0054	17.9828	17.9265	18.0256	M1B2I5	Oligopeptide transporter OPT family
14.3778	14.1932	14.2934	14.264	13.9481	13.8395	14.0332	13.9763	13.9988	13.9454	14.0526	14.382	13.2612	14.0592	14.0746	13.5896	M1B2J2	P18;Histone deacetylase complex subunit SAP18
15.6678	15.6596	15.6718	15.7115	15.954	15.8284	15.8472	15.8676	15.8211	15.7728	15.8283	15.8103	15.823	15.7864	15.8205	15.8136	M1B2L7	Guanosine nucleotide diphosphate dissociation inhibitor
16.6417	16.6544	16.6696	16.663	16.9315	16.8589	16.9083	16.9285	16.6203	16.7252	16.6562	16.6531	16.718	16.864	16.7388	16.7696	M1B2L8	Chilling-responsive protein
19.7225	19.7409	19.6126	19.6685	19.3506	19.2667	19.4246	19.492	19.2466	19.5915	19.2968	19.5542	19.171	19.2575	19.4732	19.6231	M1B2S2	Plastoquinol--plastocyanin reductase
14.3285	13.7044	14.2997	14.421	14.3031	13.6299	13.9307	14.1072	14.3713	13.5239	14.0883	14.2544	14.0996	14.3448	14.1945	13.9789	M1B2U5	NADPH--cytochrome P450 reductase
14.7212	14.7382	15.0133	14.6374	15.391	15.0333	15.3556	15.2819	15.3948	15.4424	15.291	15.4407	16.2127	16.3703	16.2855	16.3015	M1B310	Vacoular processing enzyme 1
13.3992	13.0821	13.834	13.9976	13.4796	12.7575	12.6459	12.7739	13.8233	13.8113	14.0641	14.0731	12.2542	14.1218	13.5135	14.0004	M1B340	BCL-2-associated athanogene 7
14.4433	14.5514	14.3074	14.2678	14.2743	14.4645	14.1495	14.0729	13.8468	14.0167	14.072	13.6074	14.1789	14.0236	13.9978	13.9522	M1B397	SUMO
16.6004	16.6017	16.5439	16.5748	16.3631	16.3623	16.4057	16.3262	15.9982	16.1062	16.0745	16.0366	15.8515	16.0061	15.8949	15.8699	M1B3D7	ATP:AMP phosphotransferase
16.9877	17.3671	17.3295	17.0151	16.7807	16.9646	17.0917	16.8717	16.8132	17.8899	16.9024	17.3138	16.8196	17.1589	17.0548	16.7627	M1B3M1	Germin-like protein
16.1106	15.9555	16.0606	16.0631	16.6808	16.5485	16.5443	16.5768	15.4663	15.0992	15.44	15.4013	15.0767	15.3839	15.1412	15.0133	M1B3U7	2,4-dienoyl-CoA reductase
15.7292	15.7174	15.6908	15.7754	15.6036	15.5607	15.4195	14.9165	15.662	15.6451	15.6301	15.6923	15.5236	15.4181	15.3784	15.2413	M1B3Z1	Uncharacterized protein
15.653	15.6215	15.5877	15.5725	15.6425	15.6497	15.5485	15.609	15.4874	15.5845	15.5723	15.3506	15.4141	15.4413	15.4718	15.4794	M1B3Z4	Prolyl-tRNA synthetase
17.2496	17.2254	17.1882	17.2341	17.1275	17.161	17.1232	17.1205	16.8445	16.8416	16.8982	16.9067	16.719	16.6828	16.6434	16.6699	M1B403	Prli-interacting factor l
15.2579	15.2299	15.1709	15.1044	15.8493	15.7337	15.708	15.6092	14.9317	15.0611	14.8969	14.8795	15.1449	15.0233	15.2898	15.208	M1B409	Glycerol kinase
17.8071	17.873	17.8472	17.8414	17.7662	17.8892	17.7957	17.785	17.3638	17.4024	17.3443	17.4307	17.4136	17.3905	17.5158	17.5025	M1B437	Uncharacterized protein
15.9865	15.991	15.9524	15.9153	15.8375	15.9012	15.9124	15.8038	16.1317	16.1186	16.0158	16.2637	16.314	16.0734	15.9839	16.2195	M1B451	U2 small nuclear ribonucleoprotein A
16.379	16.351	16.2701	16.2828	16.4332	16.3561	16.2055	16.2671	15.6895	15.6782	15.6376	15.748	15.937	15.7896	15.8116	15.8961	M1B457	Transferase, transferring glycosyl groups
14.8684	14.5867	14.5578	14.6349	15.0587	14.73	14.9078	14.8642	14.9951	15.0507	14.9414	15.0711	14.9475	14.9104	14.998	14.8657	M1B489	XH/XS domain-containing protein
14.4854	14.4988	14.4858	14.3103	14.7165	14.4404	14.4415	14.5226	13.8767	13.9394	13.7542	13.8967	13.9908	13.9198	14.1302	14.1768	M1B4B9	Calcineurin
16.0124	15.9729	16.0145	15.9721	15.9104	15.8875	15.9564	15.9002	15.9269	15.9771	15.9293	15.9538	15.9442	15.9704	15.7285	15.6619	M1B4F1	Ribulose bisphosphate carboxylase/oxygenase activase, chloroplast
18.3875	18.4034	18.3681	18.3967	18.1351	18.2246	18.2765	18.2397	17.9807	18.1422	17.9981	18.1006	17.886	17.8096	17.9179	17.9011	M1B4G0	Amino acid binding protein
13.2977	12.9903	13.3713	13.518	13.7165	13.8115	13.8942	13.7987	13.839	13.4334	13.6311	13.6795	13.8128	14.0415	13.8955	14.1449	M1B4G2	ERD1 protein, chloroplast;ERD1 protein, chloroplast
16.0152	15.9849	15.9695	15.99	16.2867	16.2407	16.2065	16.2375	15.9262	15.8413	15.9058	15.8966	15.8773	15.8938	15.8729	15.8131	M1B4H0	Ribonuclease
15.4881	15.4082	15.4705	15.4792	15.8361	15.744	15.7836	15.8591	15.2313	15.2475	15.2232	15.2731	15.2306	15.2361	15.1904	15.3092	M1B4H5	Calnexin
16.0867	16.0896	16.106	16.057	16.1514	16.1085	16.0518	16.1225	15.9178	15.7908	15.8326	15.8328	15.9023	15.8865	15.9606	15.9473	M1B4I6	Diadenosine tetraphosphate synthetase
15.9575	15.8709	15.8388	15.8709	15.5394	15.6025	15.5641	15.5987	15.4145	15.4769	15.4964	15.5315	15.0488	15.0407	15.0763	15.076	M1B4J2	S-adenosyl-L-methionine Mg-protoporphyrin IX methyltranserase
17.9746	17.9257	17.9299	17.9743	17.8686	17.8912	17.9292	17.8639	17.9176	17.9029	17.9355	17.9329	17.8478	17.843	17.8025	17.8098	M1B4K0	ATP-dependent Clp protease ATP-binding subunit clpA homolog CD4A, chloroplastic
19.672	19.4955	19.539	19.597	19.2282	19.2078	19.2558	19.3131	18.6368	18.7704	18.6879	18.7855	18.6099	18.6606	18.7104	18.769	M1B4L1	Acyl carrier protein
14.7159	14.5087	14.6833	14.7451	14.6004	14.6662	14.6617	14.7725	14.8115	14.7809	14.8124	14.8352	14.7227	14.8056	14.8425	14.7809	M1B4L3	Pitrilysin
15.3769	15.4012	15.2654	15.3879	15.1247	14.9629	15.2139	15.1711	15.4324	15.4927	15.5149	15.5299	15.536	15.4853	15.5786	15.6901	M1B4M0	Uncharacterized protein
17.4238	17.5529	17.3689	17.4293	17.2876	17.5218	17.4324	17.4139	17.6355	17.5148	17.5285	17.5104	17.5589	17.5176	17.4648	17.5981	M1B4N5	Dihydrodipicolinate reductase
15.5486	15.5851	15.5023	15.4569	15.5689	15.4977	15.4395	15.578	15.6241	15.4499	15.6072	15.5269	15.6278	15.518	15.5523	15.6466	M1B4S3	Cleavage and polyadenylation specificity factor 5
17.1416	17.1103	16.595	16.7636	17.0094	15.993	16.0711	16.7533	17.1531	15.4749	16.6171	17.1155	17.2914	17.0087	16.7669	17.2462	M1B4U4	ABC transporter family protein
16.1931	16.1401	16.1211	16.1049	15.9292	16.0828	15.8497	16.1107	16.0005	13.7529	16.0923	15.6315	12.5251	15.4114	15.3158	15.1481	M1B4V3	Uncharacterized protein
16.5697	16.6439	16.5388	16.4872	16.8568	16.8059	16.7091	16.7206	16.3194	16.3442	16.2533	16.2599	16.4923	16.2894	16.5431	16.5712	M1B4X6	Steroid binding protein
17.5366	17.5078	17.439	17.3406	17.6843	17.6219	17.3046	17.35	17.6965	17.4109	17.5263	17.5489	18.007	17.9651	17.9879	17.9908	M1B4Z3	Cytochrome B561
13.6029	13.0589	13.1806	13.3284	13.3006	12.9045	12.7104	13.5696	13.5755	13.4062	13.7855	13.5218	13.7884	13.8623	13.3758	13.6187	M1B500	4-coumarate--CoA ligase
15.8737	16.0106	15.6813	15.5322	15.5358	15.8243	15.5957	15.2464	15.6633	15.811	15.2122	14.2079	15.4044	13.5311	15.2824	15.329	M1B517	Dimethylallyltransferase
16.2814	16.3344	16.2336	16.2375	16.2996	16.2378	16.3057	16.2412	16.3543	16.356	16.3144	16.2974	16.4692	16.4804	16.4346	16.4451	M1B524	Calcineurin B 02
17.0268	16.9904	16.9918	16.9877	16.9232	16.8474	16.8379	16.8139	16.5882	16.7826	16.6708	16.7596	16.5177	16.4903	16.5081	16.6333	M1B525	Peptidylprolyl isomerase
17.0733	16.9448	16.8877	17.0232	16.5162	16.5525	16.7308	16.5786	16.7012	16.7908	16.7547	16.8254	16.4927	16.6036	16.5301	16.7528	M1B535	30S ribosomal protein S10, chloroplastic
17.0436	16.8744	16.97	16.9673	16.9095	16.8715	16.8211	16.9027	16.8104	16.6323	16.7838	16.823	16.5977	16.664	16.5935	16.6685	M1B539	40S ribosomal protein S8
17.1794	17.0656	16.7995	16.9209	17.105	16.6928	16.568	16.8579	16.6168	16.2912	16.365	16.4295	16.8592	16.7345	17.0008	17.4379	M1B545	Chlorophyll a-b binding protein, chloroplastic
18.6684	18.7543	18.7347	18.6949	18.8263	18.8607	18.8523	18.8925	18.2827	18.3421	18.251	18.2909	18.2114	18.3596	18.3561	18.1929	M1B547	Constitutive plastid-lipid associated protein
15.4714	15.4796	15.4765	15.4756	15.3673	15.4483	15.3378	15.3333	15.5908	15.6286	15.633	15.6435	15.8666	15.75	15.7601	15.8381	M1B550	C2 NT-type domain-containing protein
14.1875	14.4501	13.5857	14.2533	13.2412	13.5009	13.3815	13.4932	13.1697	13.6848	13.0213	13.2322	12.941	12.5038	12.5718	13.3254	M1B554	ANK_REP_REGION domain-containing protein
15.6163	15.6442	15.5513	15.5991	15.4769	15.4866	15.4691	15.4507	15.4341	15.3825	15.4446	15.4543	15.3574	15.3273	15.2895	15.2142	M1B556	Tryptophan synthase
17.4368	17.6597	17.4781	17.5695	17.5006	17.661	17.4367	17.3637	17.565	17.4578	17.5052	17.4014	17.543	17.4017	17.4319	17.5288	M1B571	Oxygen-evolving enhancer protein 3-1, chloroplast;Oxygen-evolving enhancer protein 3-1, chloroplast
16.4092	16.3657	16.4205	16.4627	16.5989	16.5012	16.5837	16.6574	16.3704	16.3545	16.415	16.4443	16.3934	16.4236	16.3775	16.4192	M1B583	Heat shock cognate protein 80
15.3017	15.3762	15.2172	15.2249	15.3545	15.232	15.3674	15.3104	14.9607	15.0408	14.9684	15.0285	15.1252	15.1123	15.2066	15.2437	M1B584	DNA-damage inducible protein ddi1
15.7189	15.6569	15.6743	15.7407	15.1828	15.3092	15.2943	15.2525	15.056	15.0768	15.1931	15.3806	14.6244	14.6031	14.3997	14.5489	M1B588	Fasciclin-like arabinogalactan protein 10
15.5737	15.6759	15.6462	15.6943	15.8596	15.9691	15.9658	15.9101	16.4063	16.4719	16.4339	16.4053	16.7206	16.732	16.7211	16.7605	M1B5A8	Pyridoxal phosphate homeostasis protein
15.1476	14.9604	14.9694	14.7928	14.7413	14.5606	14.7337	14.7314	14.6736	14.757	14.4547	14.6044	14.2322	13.8354	13.7045	13.9534	M1B5G1	Phosphoethanolamine N-methyltransferase
17.84	17.7809	17.8564	17.8653	17.7471	17.6928	17.7966	17.6938	17.7279	17.7782	17.745	17.7623	17.649	17.6385	17.646	17.625	M1B5I2	ATP-dependent Clp protease ATP-binding subunit clpA homolog CD4B, chloroplastic
17.0524	16.9939	17.0987	17.1149	17.1247	16.9985	17.0034	17.123	17.343	17.1886	17.3429	17.2698	17.4056	17.3609	17.4276	17.4633	M1B5P2	Uncharacterized protein
15.7671	15.6669	15.4429	15.5857	15.3436	15.4207	15.3182	15.4421	15.7286	15.4176	15.59	15.4619	15.4904	15.3609	15.5279	15.4092	M1B5Q4	Alpha-glucosidase
18.1613	18.1786	18.012	18.0793	17.655	17.6411	17.6639	17.6095	17.8318	17.8475	17.8634	17.7448	17.6527	17.6237	17.6285	17.5815	M1B5R1	50S ribosomal protein L15
13.8578	14.099	13.8862	13.8629	14.0073	13.9626	13.9791	13.9986	13.9297	13.9566	13.5575	14.0732	14.149	14.07	13.8715	12.8619	M1B5R7	Protein kinase PKN/PRK1, effector
13.7654	13.6873	13.7817	13.8587	13.9025	13.8822	14.0231	13.8742	14.3265	14.3111	14.1957	14.1926	14.2913	14.0298	14.3089	14.2531	M1B5S3	Cysteinyl-tRNA synthetase
14.3175	14.1318	14.2546	14.2828	14.4705	14.3912	14.423	14.451	14.5342	14.5191	14.6377	14.6267	14.6748	14.6755	14.7113	14.5442	M1B5V7	Glutaminyl-tRNA synthetase
16.6487	16.5372	16.1071	16.2119	14.7579	14.825	14.864	14.5956	16.2988	16.41	16.3259	16.6178	16.0032	15.7982	15.8962	15.9961	M1B5Y3	High mobility group protein
14.7474	14.6266	14.5424	14.6921	14.4361	14.6036	14.7375	14.5771	14.6588	14.5977	14.6761	14.722	14.3354	14.4059	14.3032	14.3201	M1B638	2-isopropylmalate synthase A
15.6184	15.2537	15.5269	15.5762	15.9071	15.5911	15.8345	15.9573	15.2988	15.0711	15.2076	15.5083	15.2308	15.4739	15.3065	15.4071	M1B647	Glutathione transferase
14.6301	14.5939	14.5926	14.5647	14.8494	14.8727	14.7349	14.8238	14.7074	14.6386	14.6762	14.7261	15.0092	15.019	14.8016	14.8855	M1B661	Arginine/serine-rich splicing factor
14.4193	14.657	14.1707	14.6212	14.5857	14.4688	14.0991	14.4364	14.5642	14.1409	14.6602	14.5554	14.3409	14.3062	14.2561	14.569	M1B675	Uncharacterized protein
16.8322	16.8109	16.835	16.8881	17.0714	17.115	17.0334	17.0631	17.3115	17.2333	17.2421	17.2332	17.3975	17.4721	17.36	17.4392	M1B690	C-7 protein
14.2646	14.3459	14.4129	14.2914	14.3	14.3669	14.3425	14.2702	14.0377	14.3936	14.0453	14.2669	14.1859	14.3377	14.3836	13.9971	M1B6A6	Pantothenate kinase
15.706	15.6271	15.3465	15.4229	14.9992	15.2897	15.1184	15.258	13.1353	13.2993	13.5081	13.6196	12.6052	12.6296	11.6773	10.3603	M1B6K9	Tyramine hydroxycinnamoyl transferase;Tyramine hydroxycinnamoyl transferase;N-hydroxycinnamoyl-CoA:tyramine N-hydroxycinnamoyl transferase THT7-1;Tyramine hydroxycinnamoyl transferase
16.047	16.118	15.9476	16.024	15.7946	15.8624	15.3319	14.3312	16.4839	16.3164	16.4276	16.404	16.1768	16.1961	16.2073	16.0797	M1B6N9	ATP binding protein
17.0795	17.2799	17.1615	17.1428	17.3892	17.4429	17.3969	17.2456	17.7344	17.7773	17.6691	17.5957	18.0001	17.9485	17.9254	17.9014	M1B6P7	Plastid lipid-associated protein 3, chloroplast
16.6795	16.7935	16.8446	16.7068	16.9142	16.876	16.944	16.9646	16.9442	17.0689	16.948	16.9874	17.2569	17.3589	17.2838	17.3314	M1B6R5	3-beta hydroxysteroid dehydrogenase/isomerase family protein
15.2256	15.3812	15.3316	15.3592	15.5185	15.6645	15.5331	15.5459	14.9693	15.1266	15.043	15.1879	15.3773	15.3276	15.5246	15.3396	M1B6Y2	Uncharacterized protein
15.0138	15.2221	14.9324	14.8548	14.994	15.033	14.7834	14.7297	11.5553	12.56	12.3892	12.3107	10.5939	12.9546	11.7984	12.8962	M1B703	Peroxidase
15.1588	14.9339	15.0858	14.8283	14.8983	14.9089	14.756	14.8428	14.6775	14.6809	14.6177	14.6533	14.3364	14.2677	14.2393	14.3021	M1B717	Protein kinase domain-containing protein
16.7361	16.7832	16.8168	16.7795	17.02	17.1276	17.1101	17.065	16.8333	16.9737	16.9379	16.9865	17.0871	17.1202	17.0571	17.0058	M1B744	Succinate dehydrogenase [ubiquinone] flavoprotein subunit, mitochondrial
14.7403	14.7464	14.6838	14.6843	14.9933	13.6544	13.1981	14.5976	14.515	13.7805	14.4249	13.9514	14.0269	14.4689	14.4452	14.4632	M1B785	Electron transfer flavoprotein-ubiquinone oxidoreductase
15.1221	15.0937	15.0964	15.0548	15.4037	15.2837	15.3524	15.3362	15.1952	15.1603	15.2194	15.1478	15.2699	15.275	15.2466	15.2758	M1B7A2	ATSUG1
15.2817	15.2716	15.3497	15.3104	15.6873	15.6239	15.6588	15.6889	15.6396	15.6199	15.6123	15.6094	15.6943	15.7735	15.7361	15.78	M1B7C9	Importin subunit alpha
18.4138	18.4541	18.4404	18.4344	18.6597	18.5708	18.5752	18.5906	18.3915	18.5007	18.366	18.3804	18.5113	18.4118	18.5579	18.4961	M1B7H0	Peptidylprolyl isomerase
16.1559	16.1327	16.1131	16.0739	16.4898	16.4867	16.4957	16.4815	15.8309	15.8163	15.8152	15.7954	15.8332	15.9517	15.8137	15.7808	M1B7H6	Aspartic protease
15.1072	14.9073	15.0932	15.0613	15.1235	15.0139	15.1448	15.1013	14.7839	14.8467	14.6904	14.7439	14.5346	14.6816	14.586	14.5285	M1B7S1	N-carbamyl-L-amino acid amidohydrolase
14.3434	14.4705	14.5527	14.5772	14.1194	14.5529	14.1742	15.0404	14.6062	14.3052	13.5312	13.6881	14.2909	13.8183	13.9585	13.5785	M1B7T4	Bis(5'-adenosyl)-triphosphatase
16.2247	16.3053	16.1647	16.1335	15.9953	15.936	15.9598	15.9651	16.1981	16.2911	16.2558	16.1937	15.9719	15.9469	16.0017	16.0268	M1B7W3	Indole-3-glycerol-phosphate synthase
14.7715	14.7936	14.9137	14.9221	14.9089	14.9306	15.0418	14.9668	15.6736	15.7504	15.6894	15.7487	15.77	15.9718	15.8155	15.7113	M1B7W7	Hydrolase, hydrolyzing O-glycosyl compounds
18.1898	18.2871	18.1015	18.1816	17.958	17.9868	17.8801	17.9468	17.8061	17.771	17.7519	17.6961	17.9572	17.8256	17.8987	17.7153	M1B7W8	28 kDa ribonucleoprotein, chloroplastic
15.5554	15.6565	15.5778	15.5993	15.6175	15.663	15.6001	15.6215	15.5749	15.5959	15.5562	15.6651	15.7887	15.6114	15.7228	15.7216	M1B7X8	Nodulation receptor kinase
17.6017	17.5817	17.5766	17.6458	17.4985	17.6032	17.6917	17.6198	17.232	17.4083	17.3123	17.4867	17.2952	17.3974	17.3996	17.4668	M1B7Y1	2-deoxyglucose-6-phosphate phosphatase
16.5886	16.6298	16.595	16.585	16.7242	16.6594	16.7131	16.6282	16.5039	16.6161	16.5586	16.5549	16.677	16.6402	16.6734	16.6436	M1B815	ATP:AMP phosphotransferase
15.1088	15.0888	15.2555	15.16	15.5696	15.5447	15.4558	15.5497	15.8369	15.7367	15.847	15.8727	16.0133	15.9939	16.0365	16.0446	M1B818	Aspartyl aminopeptidase
16.269	16.2973	16.3619	16.3005	16.434	16.3531	16.3896	16.4127	16.1811	16.1817	16.0593	16.2277	16.2935	16.323	16.3769	16.3618	M1B839	Protein yrdA
15.1883	15.2406	15.2892	15.1579	15.6208	15.4797	15.4835	15.4512	15.3708	15.1792	15.2338	15.3556	15.6311	15.5788	15.698	15.6723	M1B853	UPF0426 protein, chloroplastic
14.0636	14.1337	14.1689	14.0573	14.1493	14.1758	14.1224	14.1783	14.2087	14.0608	14.1777	14.1941	14.2588	14.2986	14.3767	14.3293	M1B856	Serine/threonine-protein phosphatase
16.2697	16.3187	16.1709	16.2483	16.2155	16.3316	16.2821	16.1977	16.1474	16.1383	16.1741	16.1031	16.1475	16.1223	16.0488	16.0593	M1B859	Asparagine--tRNA ligase
14.1835	14.1748	13.8747	13.7831	14.2558	14.1236	14.1922	14.1747	14.3219	14.3103	14.2347	14.1633	14.2591	14.2588	14.2874	14.3436	M1B866	Cytochrome P450 71A2
16.0555	15.9242	15.9693	16.0937	15.9552	15.7798	15.7729	16.0338	16.4002	16.2177	16.4073	16.4056	16.4677	16.4512	16.4809	16.4228	M1B897	EMB2746
14.8555	14.8294	15.0304	14.7744	14.9315	13.419	14.9138	14.7423	15.0645	15.1174	15.2722	14.7807	14.4063	14.7643	14.9463	14.8563	M1B8A5	Plastid RNA-binding protein
13.8122	13.667	13.2446	13.7313	13.7056	13.7467	13.7456	13.5805	12.8142	12.9558	12.5657	12.8284	13.0127	12.7926	13.0973	12.5133	M1B8B0	Nucleoside diphosphate kinase
17.6154	17.7183	17.6572	17.6509	17.6789	17.7372	17.7759	17.7259	17.434	17.618	17.4595	17.4975	17.4152	17.4542	17.5026	17.477	M1B8C3	Thylakoid lumenal 17.9 kDa protein, chloroplast
14.1519	14.1452	14.1725	14.0588	13.9502	13.8087	14.0974	14.1613	14.5646	14.49	14.648	14.6478	14.5883	14.4751	14.5002	14.632	M1B8C7	CBS domain containing protein
16.79	16.7315	16.6564	16.6538	16.5802	16.5666	16.5544	16.5573	16.3574	16.5362	16.5014	16.4932	16.2065	16.3406	16.2953	16.2755	M1B8D3	40S ribosomal protein SA
14.3783	14.3381	14.6261	14.6118	15.2018	15.0346	15.0271	15.1657	14.4418	14.4894	14.1902	14.2731	14.568	14.8894	14.6474	14.8056	M1B8J3	Glycosyltransferase
14.0505	13.9955	14.1877	14.1757	14.9397	14.8436	14.6276	14.6506	14.3812	14.2425	14.196	14.0976	14.6562	14.7339	14.4709	14.6034	M1B8K1	Homogentisate 1,2-dioxygenase
19.6739	19.5691	19.5607	19.6035	19.1694	19.157	19.2214	19.3226	19.2142	19.329	19.2326	19.4075	18.9964	19.0643	19.1674	19.2232	M1B8P1	Thioredoxin m(Mitochondrial)-type
18.41	18.3847	18.4081	18.3714	18.3005	18.2822	18.2731	18.2943	18.7108	18.763	18.7164	18.6988	18.8092	18.8756	18.7944	18.641	M1B8Q0	CT099
14.6377	14.7785	14.5857	14.6321	14.955	15.1202	14.9758	14.9056	14.9361	14.8836	14.9419	14.8524	15.1497	15.0817	15.0984	15.1372	M1B8R6	Zinc binding dehydrogenase
15.5019	15.5786	15.3812	15.5388	15.6241	15.3273	15.5131	15.5639	15.4183	15.3975	15.4486	15.2939	15.5345	15.4051	15.5559	15.6038	M1B8R8	Uncharacterized protein
16.4463	16.6917	16.6484	16.5334	17.0112	16.989	17.0524	16.9902	16.4091	16.5922	16.5114	16.4463	16.5373	16.7515	16.6347	16.5222	M1B8S4	Malate dehydrogenase
15.0996	15.2401	15.0116	14.9856	15.1754	15.0306	15.137	15.1103	14.9866	14.7826	14.9269	15.0813	15.1881	14.8031	14.8552	15.0546	M1B8T4	Heterogeneous nuclear ribonucleoprotein A2/B1
16.4689	16.4176	16.5111	16.564	16.5774	16.5705	16.6163	16.6186	16.5067	16.4752	16.5249	16.5316	16.4202	16.4757	16.3947	16.4	M1B8U0	Phosphoenolpyruvate carboxylase
16.1362	16.1156	16.25	16.139	15.8663	16.0293	15.9586	16.0916	15.4871	15.397	15.2967	15.2649	15.4314	15.4626	15.5183	15.2608	M1B8U3	Peptide N-glycanase
15.3389	14.9142	15.1837	15.1662	15.1762	14.2486	14.7585	14.9383	14.9045	14.1365	14.7824	15.0038	14.4598	13.3292	14.0488	14.1379	M1B8U6	Leucine-rich repeat family protein / protein kinase family protein
16.4871	16.3498	16.3096	16.3933	15.8883	15.8006	15.7918	15.8088	16.1566	16.1347	16.1121	16.0656	16.0377	15.9114	15.9109	15.9044	M1B8U7	50S ribosomal protein L13, chloroplastic
15.8365	15.8146	15.7776	15.7675	15.8475	15.7341	15.7169	15.7236	15.4407	15.5041	15.4879	15.4154	15.4205	15.3967	15.2707	15.375	M1B8V3	Polyadenylate-binding protein
15.1432	15.0723	15.1718	15.1319	15.1453	15.257	15.1448	15.2038	14.7483	14.7726	14.724	14.7626	14.5715	14.6454	14.6301	14.6061	M1B8V8	Subtilisin-like protease preproenzyme
15.9652	16.0719	16.0232	15.9497	16.2285	16.1819	16.2008	16.2783	15.316	15.7388	15.377	15.6456	15.4389	15.7163	15.8078	15.86	M1B8Z7	Uncharacterized protein
14.8926	14.5603	14.7328	14.9298	14.9347	14.5411	14.628	14.9018	15.0749	13.1477	14.6699	14.8587	14.6981	14.8184	14.7318	14.0432	M1B907	Transmembrane protein 147
15.6805	15.6645	15.6668	15.6031	15.2107	15.1986	15.2273	15.2995	15.7365	15.7767	15.7638	15.8372	15.772	15.5792	15.6009	15.6741	M1B932	Ornithine transcarbamylase
15.8616	15.9189	15.7572	15.9782	15.7457	15.68	15.6785	15.6814	16.6202	16.4357	16.6083	16.5647	16.6558	16.6362	16.7253	16.6565	M1B972	Alpha/beta hydrolase
16.4157	16.4312	16.4307	16.3522	16.5269	16.5103	16.4341	16.5065	16.6512	16.5954	16.6316	16.5594	16.6781	16.6169	16.6337	16.6721	M1B973	Transcription factor APFI
13.9495	13.8336	12.9156	13.8295	13.9724	13.7861	14.1329	14.0083	14.0203	13.5174	14.0554	14.0823	14.3716	14.2464	14.3257	14.2394	M1B991	U2 snRNP auxiliary factor large subunit
12.4393	11.9394	12.1053	11.9327	12.1775	12.1441	12.6128	12.2733	12.2051	11.1702	11.9288	11.5132	11.9744	11.5573	10.8369	11.492	M1B992	Signal recognition particle 68 kDa protein
16.2547	16.4877	16.6119	16.2661	16.2912	16.5608	16.238	16.3261	16.4365	16.2714	16.3873	16.5139	16.2242	16.4203	16.2889	16.1695	M1B997	Protein MSP1
16.1734	16.2608	16.0853	16.1987	16.3512	16.4396	16.23	16.326	16.0415	15.9829	15.8329	16.1318	16.151	15.9235	14.2794	15.7672	M1B9B0	D-lactate dehydrognease 2
16.8207	16.7758	16.9257	16.8979	16.8848	16.8015	16.8392	16.9047	13.3946	12.5545	13.4745	12.3721	13.6778	12.6438	13.4405	12.4542	M1B9D1	NADH dehydrogenase
15.9161	16.0999	15.9685	16.0364	15.8416	15.8453	16.1262	15.7938	15.7693	15.7963	15.9276	15.7273	15.7473	15.8195	15.8131	15.5829	M1B9F1	GTP cyclohydrolase II
14.3144	14.3499	14.3503	14.3422	14.5755	14.5087	14.4202	14.463	14.5021	14.44	14.468	14.4418	14.5546	14.5597	14.3976	14.5172	M1B9H1	Endoplasmic reticulum [ER]-type calcium ATPase
15.874	15.8607	15.8955	15.8263	15.7745	15.7725	15.7471	15.7741	15.5854	15.5559	15.6601	15.6261	15.4908	15.5323	15.5382	15.5311	M1B9P5	Chloroplast envelope protein 1
15.6663	15.7121	15.7346	15.6254	16.1734	15.997	16.0947	16.0544	15.4095	15.5273	15.5169	15.4941	15.6084	15.6271	15.4743	15.5187	M1B9T8	Aspartate aminotransferase
17.5682	17.6233	17.5158	17.5323	17.1191	17.1477	17.1537	17.1018	17.3519	17.3892	17.3323	17.3239	17.1339	17.1272	17.1366	17.1239	M1B9U2	Uncharacterized protein
17.3911	17.1143	17.2248	17.3126	17.1628	17.1687	17.1563	17.1475	17.1714	17.0897	17.1983	17.1171	16.872	16.9223	16.7468	16.7232	M1B9V2	GDP-mannose pyrophosphorylase
15.6371	15.5687	15.5361	15.2096	14.9006	14.8811	14.8893	15.1031	15.5892	15.3253	15.5862	15.7181	15.5675	15.5692	15.5823	15.2895	M1B9Y5	ATP binding protein
15.4585	15.3707	15.4302	16.01	15.1945	15.3529	15.141	15.4602	15.6798	15.9023	15.5488	15.7664	15.6688	15.9682	15.7603	15.801	M1BA01	Cinnamyl alcohol dehydrogenase
14.7392	14.9527	14.9876	14.8129	14.6331	14.8991	14.8191	14.6759	15.1177	15.1358	15.1095	15	15.1973	15.515	15.3923	15.097	M1BA07	ADP-ribosylation factor
16.2752	16.3681	16.2453	16.1812	16.3561	16.323	16.209	16.2389	15.9298	16.0518	15.9921	16.0637	16.0191	15.9603	16.0085	16.1041	M1BA21	ALY protein
15.2614	15.0663	14.5423	14.5587	12.7782	13.8119	13.0208	12.015	15.5841	15.9367	15.771	15.871	15.8916	15.941	16.0479	15.823	M1BA27	High mobility group protein
15.0795	15.0095	15.0994	15.0316	15.3811	15.4724	15.22	15.3942	14.7534	14.8265	14.8567	14.82	14.7189	14.8106	14.7579	14.7274	M1BA40	Uncharacterized protein
17.6808	17.7074	17.6685	17.6725	17.7383	17.7206	17.749	17.774	17.7354	17.7094	17.6498	17.6553	17.6926	17.6344	17.6918	17.6541	M1BA41	Dehydroascorbate reductase
17.0452	17.0408	17.0123	17.0467	17.1404	17.0572	17.0516	17.08	16.9921	17.0455	16.993	16.9924	16.9443	16.9207	16.9231	16.919	M1BA84	Elongation factor 1-gamma
14.5796	14.5176	14.6163	14.5332	14.8651	14.5204	14.5955	14.7189	14.5919	14.3093	14.4895	14.3072	14.2312	14.2196	14.447	14.5975	M1BAA3	Protein transport protein SEC23
14.2664	14.3013	14.2932	14.1824	14.394	14.3006	14.0724	14.4335	14.4015	14.2337	14.3469	14.3295	14.403	14.517	14.6192	14.6456	M1BAA5	O-glucosyltransferase 2
17.1983	17.1146	17.0752	17.1176	16.9838	16.9883	16.9207	16.9875	17.1841	17.1935	17.2141	17.2018	17.0251	16.9646	16.99	16.9871	M1BAA6	Serine hydroxymethyltransferase
17.5203	17.6407	17.5096	17.5128	17.9862	17.8341	17.907	17.9244	17.7261	17.8383	17.8199	17.7563	17.6864	17.6806	17.7621	17.7911	M1BAC2	RNA binding protein
14.9157	14.8591	15.0057	14.9845	15.1475	15.1467	15.1449	15.1256	15.171	15.0033	15.0895	15.185	15.1572	15.2568	15.1907	15.1229	M1BAD2	26S proteasome non-ATPase regulatory subunit 1 homolog
14.9307	14.9161	15.075	14.8774	14.7075	14.7897	14.8543	14.7747	14.9646	14.8647	14.7985	14.7906	14.7136	14.9581	14.8641	14.6827	M1BAG1	Methionine aminopeptidase
15.074	15.0937	15.1449	15.1345	15.3077	15.363	15.3829	15.306	15.2438	15.3683	15.2852	15.3417	15.4511	15.3544	15.3644	15.4339	M1BAH1	Uncharacterized protein
16.6802	16.6468	16.7984	16.7703	16.7332	16.7484	16.8617	16.7845	17.0922	17.1008	17.0477	17.1026	17.3022	17.3424	17.2733	17.3081	M1BAI7	Short-chain dehydrogenase
15.0977	15.124	15.0941	15.0699	15.346	15.215	15.2625	15.2951	15.2475	15.2467	15.2189	15.2067	15.2592	15.2264	15.2477	15.2467	M1BAK6	26S proteasome subunit 4
14.6269	14.6934	14.6601	14.486	14.6698	14.4438	14.6098	14.6691	14.8862	14.9106	14.9814	14.9194	14.8219	14.8047	14.7849	14.8149	M1BAK9	3-ketoacyl CoA thiolase 1
13.413	13.0493	13.384	13.0928	13.4429	13.382	13.3668	13.5174	13.7117	13.6813	13.7557	13.8365	13.9761	14.0461	13.9731	13.8785	M1BAL7	UDP-glucose:sterol 3-O-glucosyltransferase
14.7924	15.07	14.881	14.9337	14.9151	14.8235	14.7971	14.9027	13.4363	13.9542	13.0399	13.4936	13.8701	12.3137	13.7751	13.28	M1BAR4	Molybdopterin cofactor sulfurase
15.2858	15.2623	15.2451	15.3937	15.571	15.5494	15.461	15.6193	15.5298	15.4987	15.5085	15.3736	15.4106	15.3925	15.4059	15.5361	M1BAR8	EMB2734
14.3485	14.3171	14.3626	14.3364	14.576	14.6341	14.5021	14.3702	14.4974	14.6341	14.3416	14.3412	14.6146	14.2239	14.4753	14.45	M1BAV8	Ammonium transporter
15.7165	14.5311	15.8758	15.7142	15.9775	15.7884	16.0456	15.8875	16.3049	16.4448	16.4361	16.021	16.1646	16.2025	16.3747	16.4105	M1BAW9	Armadillo/beta-catenin repeat family protein
15.764	15.8292	15.8234	15.6632	16.1749	16.1298	16.0483	16.1322	15.8123	15.7205	15.703	15.7855	15.4813	15.7379	15.6154	15.679	M1BAX0	Uncharacterized protein
15.7347	15.527	15.6293	15.696	15.7903	15.5641	15.8177	15.6911	15.336	15.1771	15.3311	15.2974	15.2082	14.8351	15.2835	15.1342	M1BAX6	30S ribosomal protein S15, chloroplastic
15.3548	15.171	15.3504	15.2358	15.84	15.7161	15.7263	15.7673	15.2715	14.8404	15.1148	15.1522	14.8051	15.1144	14.7636	14.9061	M1BAY8	Heat shock 70 kDa protein
16.7529	16.7855	16.7388	16.7906	16.6396	16.6456	16.7081	16.691	17.3645	17.3576	17.3896	17.308	17.372	17.3759	17.3523	17.3712	M1BB01	Aldo/keto reductase
16.0867	16.17	16.1721	16.1131	16.1937	16.1975	16.1531	16.1455	16.1729	16.0586	16.1189	16.1186	16.3359	16.3474	16.3468	16.3313	M1BB56	Beta-glycosidase
17.1908	17.2595	17.1146	17.087	17.122	17.3305	17.1622	17.2047	17.2401	17.3788	17.2628	17.2647	17.1945	17.1517	17.156	17.2054	M1BB68	40S ribosomal protein S19
14.7829	14.7624	14.9268	14.7341	15.1105	15.2166	15.0452	15.1942	14.2979	14.2647	14.0927	14.3224	14.2524	14.3333	14.2971	14.4145	M1BB95	Alpha-glucosidase
15.6013	15.471	15.3576	15.4982	15.7494	15.5772	15.6478	15.664	15.7407	15.6744	15.7264	15.7753	15.9099	15.9088	15.8583	15.8658	M1BBC0	Ubiquinone biosynthesis protein
17.9386	17.9402	18.0073	17.9312	17.9074	17.8094	17.8531	17.8566	18.2425	18.2301	18.2036	18.2538	18.5578	18.5017	18.5258	18.5313	M1BBH3	Patellin-3
18.0473	18.0437	18.0997	18.0485	18.1058	17.9955	18.0233	18.0002	18.4412	18.5492	18.3916	18.4814	18.7443	18.7146	18.7062	18.724	M1BBH4	Patellin-3
12.1404	13.3246	12.614	12.1761	11.9825	12.3364	12.5606	12.3098	13.2545	12.6312	13.1927	12.3199	12.3102	12.2418	13.0383	12.689	M1BBI1	Endo-1,3-1,4-beta-d-glucanase
15.4754	15.2639	15.2247	15.2634	14.2592	14.2847	14.2735	14.3366	14.9197	15.0599	14.9899	15.1839	14.9406	14.6328	14.6307	14.7225	M1BBJ1	Sinapyl alcohol dehydrogenase 2
15.528	15.6199	15.5634	15.4509	16.0814	15.9755	15.9659	15.9885	15.5195	15.4734	15.4354	15.4301	15.8156	15.907	16.0349	15.8887	M1BBJ6	Cinnamyl alcohol dehydrogenase
16.4768	16.5233	16.5065	16.5627	16.2844	16.3608	16.4706	16.4406	16.3057	16.5918	16.3027	16.3905	16.3059	16.4982	16.453	16.4494	M1BBT2	2-deoxyglucose-6-phosphate phosphatase
15.9507	15.8736	15.8564	15.8698	15.583	15.622	15.6051	15.664	15.6388	15.6111	15.6364	15.6672	15.3547	15.3564	15.4331	15.3868	M1BBU4	Methylenetetrahydrofolate reductase
14.9541	14.7931	14.8046	14.8548	15.2481	15.0768	15.0559	15.1741	14.4793	14.525	14.4467	14.4704	14.6448	14.5938	14.7143	14.607	M1BBV1	Leucine zipper-EF-hand-containing transmembrane protein 1
18.6899	18.7174	18.6634	18.6807	18.6233	18.6309	18.6358	18.5999	18.7581	18.746	18.718	18.7035	18.7556	18.6543	18.7046	18.7491	M1BBV8	4-nitrophenylphosphatase
16.8663	16.5066	12.6241	11.4669	15.9912	16.3204	11.2579	11.0643	14.4263	14.4873	14.4085	14.2812	14.0748	13.7655	13.6827	13.8274	M1BBX3	Anthocyanidine rhamnosyl-transferase
16.5679	16.4624	16.398	16.5373	15.9031	15.9985	16.2258	16.2895	16.22	16.8871	16.4195	16.7632	16.4359	16.5053	16.7033	16.8129	M1BBZ5	Threonine endopeptidase
14.0912	14.0447	14.0812	14.0194	13.5849	13.6384	13.6067	13.6618	14.2633	13.9277	14.1779	14.2341	13.9576	13.9591	14.0449	13.8484	M1BC15	GTP cyclohydrolase II
16.3013	16.1082	16.2378	16.1187	16.2756	15.8731	15.9239	16.282	15.0777	15.0488	14.8086	15.2966	14.4624	15.2669	14.7301	14.8575	M1BC18	14-3-3 16R;14-3-3-like protein 16R
15.8563	15.8884	15.9381	15.8183	15.9594	15.9352	15.9853	15.9312	15.8094	15.7546	15.8053	15.8262	15.8837	15.9516	15.9118	15.8414	M1BC19	Prohibitin
15.7631	15.7707	16.0029	15.873	16.2755	16.2603	16.2382	16.1684	16.4377	16.5776	16.444	16.4571	16.8134	16.8305	16.7654	16.7859	M1BC20	Peroxidase
17.822	17.7049	17.7207	17.7174	17.6898	17.5566	17.4921	17.4625	17.6653	17.5018	17.5695	17.5865	17.78	17.6879	17.6951	17.7568	M1BC29	Protein TIC 20
17.6285	17.632	17.6293	17.6223	17.5145	17.5483	17.5493	17.5249	17.5408	17.6184	17.5453	17.5284	17.5617	17.5352	17.5634	17.5794	M1BC31	Membrane-associated 30 kDa protein, chloroplastic
14.4417	14.4601	14.5098	14.5508	14.6223	14.4667	14.6188	14.6477	14.8189	14.9412	14.8405	14.8756	15.0879	15.1048	15.0639	15.0513	M1BC39	Nucleic acid binding protein
14.5584	14.6957	14.298	14.457	13.817	14.2455	13.674	14.1848	13.8275	14.6036	13.7814	13.4247	8.70129	13.4224	13.0824	13.2639	M1BC65	Anthranilate N-benzoyltransferase protein
16.4535	16.4866	16.4809	16.4702	16.5301	16.5255	16.527	16.5207	16.6275	16.5722	16.5591	16.5857	16.8365	16.799	16.7767	16.7626	M1BCC6	Oxidoreductase
15.4187	15.3014	15.2915	15.2325	15.2465	15.1974	15.027	15.1498	15.0804	15.0376	14.9905	15.0023	14.9135	14.7722	14.9003	14.892	M1BCG7	40S ribosomal protein S15
16.2896	16.1099	15.8387	15.8324	15.7171	15.5071	15.237	15.3019	16.2264	15.7028	15.9857	15.9413	16.1231	16.1062	15.9265	16.051	M1BCI2	Lesion-inducing protein
14.7307	14.6179	14.6628	14.6437	13.8889	13.9476	14.0027	14.0465	14.5038	14.3772	14.4194	14.4651	13.813	13.9546	13.9862	13.8265	M1BCJ0	Acyl-[acyl-carrier-protein] desaturase
16.1189	16.1899	16.1037	16.0747	16.2318	16.3221	16.2228	16.1979	16.0093	15.9849	16.023	15.9612	15.9916	15.8217	16.035	15.8966	M1BCJ2	Prefoldin subunit
15.3349	15.3554	15.3634	15.3948	15.3865	15.3826	15.4089	15.431	15.4438	15.4794	15.537	15.5123	15.3815	15.389	15.3936	15.4087	M1BCJ8	2-isopropylmalate synthase
15.5231	15.3741	15.5729	15.6448	15.6571	15.5352	15.6488	15.6922	15.5934	15.3561	15.5521	15.6708	15.5769	15.755	15.5173	15.6043	M1BCL1	26S proteasome regulatory particle non-ATPase subunit 8
18.4785	18.4997	18.4658	18.4834	18.4761	18.4582	18.4455	18.518	18.0803	18.1407	18.1464	18.0585	17.9575	18.0036	18.0164	18.0631	M1BCL3	Thioredoxin x
17.4041	17.3876	17.3852	17.2927	17.2618	17.2174	17.1201	17.1247	17.219	17.0765	17.2852	17.1461	17.1854	16.9616	17.1462	17.209	M1BCM6	Nucleoside transporter
19.5154	19.5869	19.5214	19.4996	19.484	19.5239	19.5093	19.4838	19.5195	19.5339	19.5071	19.4787	19.5415	19.5261	19.5679	19.5905	M1BCP7	Thioredoxin-dependent peroxiredoxin
17.1216	17.0588	17.0161	17.0512	16.6662	16.668	16.6949	16.7495	16.5895	16.5831	16.6093	16.6518	16.3665	16.3131	16.2874	16.2302	M1BCQ9	Biotin carboxylase
14.7334	14.6281	14.5866	14.5934	14.9548	14.8342	14.8712	14.8774	15.0984	14.9061	15.0215	15.032	15.1979	15.2574	15.3034	15.2987	M1BCR0	Dihydroorotate dehydrogenase (quinone), mitochondrial
13.0823	12.8457	12.8545	12.905	12.5622	13.0274	12.6117	13.0543	12.5187	12.4629	12.5941	12.7197	12.5739	11.6884	11.8242	12.5392	M1BCS3	Obtusifoliol 14alpha-demethylase
15.1046	14.4586	15.1207	14.9637	15.3574	15.2376	15.2511	15.3246	15.2394	15.2104	15.1924	15.1813	15.5067	15.5935	15.5812	15.4679	M1BCS5	Uncharacterized protein
15.5261	16.3367	15.5697	15.8588	16.43	16.4955	16.135	16.2591	16.1162	15.8132	16.3079	16.0841	15.8058	16.272	16.0588	16.2153	M1BCU5	Isochorismatase
15.0888	14.9975	15.0985	15.0779	15.321	15.1498	15.3072	15.3249	14.9346	14.917	14.9575	15.0259	15.0974	15.2074	15.0784	15.0699	M1BCU6	Succinate--CoA ligase [ADP-forming] subunit alpha, mitochondrial
17.1825	17.1251	17.0377	17.086	16.832	16.9005	16.7608	16.7836	16.8406	16.8653	16.8185	16.8065	16.7239	16.6934	16.6854	16.6187	M1BCZ9	Lactoylglutathione lyase
15.4764	15.5873	15.5527	15.4919	14.9845	14.9955	15.0226	14.9938	14.5016	14.265	14.4349	14.1693	13.7796	13.8818	13.4373	11.2522	M1BD07	Peroxidase
16.1369	16.2884	16.0905	16.174	16.1644	16.1804	16.0193	16.1661	16.2506	16.3354	16.2622	16.1851	16.3078	16.2511	16.4321	16.4198	M1BD30	Pyridoxal phosphate homeostasis protein;Proline synthetase associated protein
15.7321	15.5905	15.712	15.4716	15.2058	15.4358	15.2156	15.2258	15.5899	15.6176	15.7215	15.7829	15.5772	15.5976	15.6448	15.4768	M1BD41	Multicopper oxidase
14.3292	14.0489	14.2466	14.1672	13.9834	13.7062	13.5545	13.8964	14.1015	14.1158	14.3344	14.4185	14.4134	14.1789	14.189	14.1649	M1BD42	Glucan endo-1,3-beta-D-glucosidase
15.3842	15.3658	15.263	15.2672	14.5453	14.7215	14.5635	14.5863	15.2297	15.2106	15.2298	15.2961	14.7872	14.7182	14.7883	14.6088	M1BD45	Adenylyl-sulfate reductase
19.5612	19.6318	19.5553	19.6189	19.6226	19.6549	19.6506	19.6291	19.6817	19.7482	19.7297	19.7143	19.7198	19.7647	19.6364	19.665	M1BD50	ATP synthase gamma chain, chloroplastic
15.7962	15.7912	15.8492	15.7769	15.9955	16.0296	16.0383	15.9342	16.0128	16.1319	16.0636	15.998	15.9544	16.0321	15.8676	15.9159	M1BD53	Nuclear acid binding protein
12.4648	13.1336	12.3317	13.2506	12.4403	12.8163	11.8491	11.8655	17.7049	17.5329	17.702	17.9564	16.5628	16.2003	16.3186	16.5179	M1BD67	Stem 28 kDa glycoprotein
17.7386	17.6077	17.517	17.6453	17.0097	17.1952	16.9262	16.979	17.6832	17.5419	17.7938	17.8345	16.9723	16.7894	16.7827	16.7992	M1BD68	Stem 28 kDa glycoprotein
20.4752	20.5767	20.4977	20.4738	20.5969	20.5813	20.4939	20.4434	20.4855	20.4237	20.4165	20.3653	20.6459	20.6064	20.6417	20.6797	M1BDD6	Thylakoid membrane phosphoprotein 14 kDa, chloroplast
14.1921	14.3531	14.2001	14.1989	14.2502	14.3068	14.1301	14.1855	13.6055	13.6888	13.815	13.7669	13.9434	13.7992	13.804	13.8173	M1BDJ6	ATGCN5
15.5761	15.6101	15.5043	15.72	15.5145	15.4644	15.5977	15.835	15.5627	15.6531	15.7182	15.7854	15.4032	15.4305	15.4872	15.4532	M1BDK6	OTU domain-containing protein 6B
16.8382	16.8938	16.9138	16.8619	17.0982	17.1176	17.0279	17.022	16.751	16.746	16.7391	16.7584	16.8465	16.825	16.7771	16.8266	M1BDK7	4-alpha-glucanotransferase
15.8187	15.8212	15.876	15.8892	16.0034	16.0167	16.0236	15.9944	16.4132	16.3537	16.3718	16.3865	16.4581	16.4757	16.4156	16.4359	M1BDN6	Glucan/water dikinase
16.4976	16.4952	16.3943	16.4609	15.9634	16.037	15.9809	15.9204	16.1715	16.2065	16.2412	16.2024	16.1094	16.1673	16.0923	16.1201	M1BDQ7	S1 RNA-binding domain-containing protein
16.256	16.229	16.2821	16.2408	16.2048	16.3268	16.501	16.3651	15.9848	16.1089	16.0148	16.2349	16.186	16.3022	16.2014	16.2099	M1BDU1	Superoxide dismutase
16.6102	16.678	16.7093	16.6306	16.8555	16.8254	16.8102	16.7475	17.2139	17.1295	17.1406	17.1806	17.4857	17.51	17.4787	17.4974	M1BDY2	NADH dehydrogenase
20.4822	20.3177	20.6922	20.4441	20.5565	20.3921	20.671	20.8103	20.3378	20.4892	20.3708	20.319	20.4571	20.9059	20.7137	20.2935	M1BDZ8	Chlorophyll a-b binding protein, chloroplastic
13.481	13.7881	13.742	13.7415	13.3532	13.5229	13.424	13.6373	13.3314	13.2107	13.2347	13.5459	13.3206	13.3801	13.2468	13.0934	M1BE42	Octicosapeptide/Phox/Bem1p domain-containing protein
14.5937	14.4625	14.4795	14.3807	14.3123	14.4913	14.2813	14.5482	15.1481	15.1913	15.1054	15.2024	15.227	15.0798	15.2098	15.0203	M1BE69	Short chain alcohol dehydrogenase
14.8568	14.7525	14.872	14.925	15.0243	15.0363	14.8205	15.0857	15.2664	15.1785	15.2848	15.3678	15.3798	15.4592	15.2538	15.4246	M1BEA0	RuvB-like helicase
12.6655	12.6293	12.6649	12.5116	12.6862	12.6609	12.6488	12.6499	12.943	12.7826	12.9942	12.8713	13.1227	13.0086	13.0742	13.1226	M1BEB1	IWS1 C-terminus family protein
19.5533	19.6282	19.5916	19.4622	19.4038	19.41	19.2894	19.3403	19.8872	19.8281	19.8336	19.9442	20.0286	19.9208	19.8984	19.9275	M1BEC3	Histone H3
16.1199	15.9479	16.2122	16.0202	16.1061	15.9262	16.0628	16.0781	15.7733	15.8071	15.7663	15.6765	15.737	15.9018	15.8652	15.8334	M1BED7	Prohibitin
15.4652	15.4445	15.6096	15.5242	15.9582	15.9024	15.9852	16.0443	15.6621	15.6279	15.5968	15.7202	15.8617	15.9247	15.8605	15.7943	M1BEG6	NAD-dependent isocitrate dehydrogenase
16.5364	16.6265	16.5559	16.5918	16.5522	16.5669	16.612	16.5273	16.7709	16.8797	16.8686	16.799	16.8556	16.8808	16.8632	16.8835	M1BEH1	Uncharacterized protein
16.185	16.0613	16.3604	16.216	16.1614	16.1762	16.1771	16.1561	14.3251	15.7564	15.0946	15.9507	15.9309	16.0157	16.0482	10.4723	M1BEH2	Pantothenate kinase
14.8734	14.9693	15.0359	15.0834	15.6517	15.5652	15.6076	15.388	14.0257	13.9503	13.768	14.1601	14.3334	14.2829	14.5283	14.5667	M1BEK6	Short chain alcohol dehydrogenase
15.6602	15.6583	15.7157	15.7202	15.8131	15.7828	15.8149	15.849	16.2646	16.2466	16.2111	16.1928	16.2777	16.3156	16.3073	16.2747	M1BEN2	Beta-subunit of K+ channels
18.1408	18.1479	18.0645	18.0646	17.6197	17.671	17.6136	17.6781	17.8873	17.8482	17.8421	17.8681	17.6365	17.5716	17.6627	17.6428	M1BEQ3	Ribosomal protein S9
15.5959	15.6467	15.7252	15.5069	15.7421	15.7508	15.6118	15.6847	13.8724	13.7902	13.959	13.8809	13.9551	13.8566	13.9596	13.8649	M1BEU2	Serine-threonine protein kinase, plant-type
14.8897	14.9598	14.7477	14.9013	14.7502	14.8223	14.8107	14.7768	15.105	15.1139	15.1794	15.2555	14.9084	14.9608	14.9291	14.7638	M1BEV1	Non-symbiotic hemoglobin 2
15.0299	15.3333	15.0723	14.8756	14.8948	14.7801	14.5584	14.966	14.4606	13.0552	14.4158	14.3152	14.4331	14.6673	14.6159	14.8083	M1BF07	Chaperone protein DNAj
17.8307	18.0406	17.8886	17.914	17.8138	17.9462	18.0706	17.9495	17.3993	17.7172	17.4944	17.7542	17.6348	17.5195	17.6388	17.626	M1BF18	ATP synthase delta chain, chloroplastic
16.4472	16.5204	16.4192	16.4856	16.4773	16.4967	16.421	16.4578	16.1652	16.1029	16.0742	16.0869	16.1474	16.0315	16.1015	16.15	M1BF20	Oxidoreductase
14.0967	14.4451	14.2246	14.2412	14.378	14.2059	14.302	14.318	14.3408	14.1752	14.133	14.0946	14.382	14.404	14.3738	14.3526	M1BF26	Mannan endo-1,4-beta-mannosidase
14.8489	14.6812	14.7814	14.8719	15.0282	14.7352	14.6904	14.918	14.5656	14.2354	14.4307	14.3771	14.4699	14.5251	14.3924	14.475	M1BF30	Proteasome endopeptidase complex;Proteasome subunit beta
12.1986	11.9348	12.3528	12.4633	12.3902	11.3792	12.1007	12.3844	13.0365	12.8201	12.7363	12.7629	13.3481	13.1261	13.2868	13.2519	M1BF33	SEO_N domain-containing protein
16.0895	16.057	16.0664	16.0819	16.132	16.293	16.2561	16.2656	16.4352	16.4196	16.4019	16.4959	16.5805	16.4049	16.5226	16.6472	M1BFE0	Protein-ribulosamine 3-kinase, chloroplastic
15.8602	15.8685	15.9647	15.8252	16.0894	16.0773	16.0812	16.1179	15.6483	15.5642	15.6273	15.6955	15.8057	15.7492	15.7807	15.8359	M1BFJ5	Ripening regulated protein
13.659	13.4666	13.2761	13.588	13.2958	13.4519	13.2889	13.1498	13.4764	12.7596	13.5943	13.6259	13.3698	13.3874	13.2921	13.5166	M1BFL2	Uncharacterized protein
15.1289	15.2712	15.268	15.1887	15.4838	15.518	15.5803	15.4853	15.7861	15.714	15.8053	15.7416	15.8052	15.9828	15.8381	15.7965	M1BFM3	Glycosyltransferase
16.5279	16.5866	16.5784	16.5354	16.4886	16.5104	16.4627	16.5039	16.3434	16.2793	16.3318	16.3768	16.2283	16.1376	16.1481	16.2892	M1BFP7	Aldehyde dehydrogenase
17.788	17.6447	17.6206	17.6801	17.6189	17.5743	17.4779	17.5492	17.4696	17.3815	17.4564	17.4648	17.3816	17.2908	17.3298	17.3396	M1BFR3	60S ribosomal protein L17
14.0349	13.9098	14.1814	14.0181	14.018	14.0242	13.7453	14.0768	13.7395	13.6173	13.6273	13.564	13.6765	13.9129	13.5199	13.4584	M1BFR5	mRNA cap-binding protein
17.0322	16.9342	16.8517	16.9251	17.0708	16.9452	16.9337	16.9001	16.902	16.9193	16.9086	16.8847	17.0022	16.9134	16.9049	16.9213	M1BFS0	Heterogeneous nuclear ribonucleoprotein 27C
16.0591	15.8721	15.9891	15.9492	16.2984	16.0774	16.2211	16.2732	16.1979	16.2223	16.2126	16.2231	16.1265	16.3762	16.306	16.151	M1BFS5	Cyanate hydratase
17.2909	17.1861	17.1723	17.2669	16.9589	16.8922	16.8087	16.988	17.1237	16.9203	17.0913	17.0817	16.9296	16.7942	16.8637	16.8567	M1BFS6	50S ribosomal protein L28, chloroplastic
16.5904	16.5751	16.6194	16.5618	16.7043	16.6562	16.7445	16.7553	16.5524	16.7201	16.527	16.5575	16.4171	16.5237	16.5063	16.4807	M1BFT7	Malate dehydrogenase
14.8203	14.683	14.9473	14.9114	15.1689	14.9745	15.1989	15.0332	15.9452	15.9655	15.891	16.0758	15.8976	16.2337	16.1013	15.8948	M1BFU3	Germin-like protein
14.6885	14.807	14.7265	14.6716	15.1756	15.1294	15.1398	14.9647	14.912	14.8859	14.834	14.8348	15.0685	15.0235	15.0338	15.0986	M1BFV1	Electron transfer flavoprotein subunit beta
16.607	16.5349	16.3933	16.5296	16.1036	16.3117	16.2713	16.1431	16.2279	16.3876	16.3267	16.3337	15.8904	15.803	15.7426	15.7053	M1BG20	Methyltransferase
17.7078	17.9157	17.7209	17.7711	17.9944	18.0837	18.0646	18.0009	17.6729	17.8218	17.7061	17.6973	17.7712	17.7012	17.8587	17.8164	M1BG50	Desacetoxyvindoline 4-hydroxylase
14.7139	14.7557	14.6597	14.6723	14.8801	14.845	14.7539	14.8049	14.8768	14.9045	14.8936	14.9326	14.8621	14.869	14.9706	14.8483	M1BGA1	Trehalose synthase
15.0627	15.0921	15.2635	15.1233	15.5622	15.5351	15.5326	15.5397	15.4972	15.5041	15.4643	15.4752	15.6258	15.6885	15.6304	15.7517	M1BGA6	CYP72A57
10.8546	12.4378	12.2042	12.5925	13.2244	11.9359	11.8966	12.8808	13.5854	13.9579	13.6968	13.5091	13.9567	14.2279	13.9208	14.1525	M1BGB4	Small heat-shock protein
16.6	16.727	16.6809	16.5904	16.2144	16.4614	16.3793	16.2024	16.3058	16.3653	16.2892	16.3339	16.3146	16.2919	16.386	16.2961	M1BGE7	Uncharacterized protein
18.1832	18.2264	18.1696	18.177	18.021	18.0196	18.084	17.9935	18.069	18.2062	18.1128	18.0524	18.1287	18.0474	18.0875	18.1107	M1BGF6	Chloroplast protease
14.0856	14.0225	14.0734	13.957	14.1087	14.1601	13.9516	14.1763	14.6009	14.2888	14.4873	14.5036	14.5302	14.5973	14.6306	14.6179	M1BGG0	Peroxisomal membrane protein
15.8603	15.6362	15.7582	15.779	15.5402	15.8808	15.859	15.774	15.4497	13.9988	15.4635	15.5002	15.3862	15.3705	15.377	15.0117	M1BGI9	Serine/threonine-protein phosphatase 5
15.7495	16.1027	15.8452	15.7697	15.7681	16.2521	15.7955	15.8706	15.7568	15.8856	15.6615	15.8032	15.82	15.558	15.5638	15.6685	M1BGN4	Cytosolic acetoacetyl-coenzyme A thiolase
13.7874	13.5584	13.6309	13.6536	13.0779	12.9172	13.1943	13.1609	12.4343	12.7309	12.7288	12.9992	12.4993	12.2042	11.4341	11.0497	M1BGP8	Uncharacterized protein
15.3061	15.4328	15.2205	15.3172	15.1656	15.2773	15.2812	15.2469	15.514	15.4785	15.5632	15.5465	15.3716	15.3041	15.4658	15.3481	M1BGQ5	Glucose-6-phosphate 1-dehydrogenase;Glucose-6-phosphate 1-dehydrogenase, chloroplastic
16.521	16.6467	16.5272	16.551	16.3401	16.3799	16.2673	16.2875	16.5591	16.4086	16.5689	16.5054	16.2909	16.3237	16.2994	16.3724	M1BGS3	Ribulose-1,5 bisphosphate carboxylase/oxygenase large subunit N-methyltransferase, chloroplast
15.9073	15.952	15.9078	15.901	16.3733	16.3661	16.2459	16.2739	16.622	16.4937	16.5756	16.494	16.819	16.7304	16.732	16.7819	M1BGS9	4-coumarate--CoA ligase
16.5079	16.587	16.4715	16.4783	16.6812	16.6802	16.5435	16.5688	16.6866	16.7243	16.708	16.7137	16.8825	16.7238	16.7143	16.7758	M1BGT3	Heterogeneous nuclear ribonucleoprotein A1
15.1614	15.0621	15.0577	14.9019	15.3076	15.3383	15.1944	15.384	15.3277	15.3108	15.2861	15.0775	15.4888	15.5114	15.3472	15.3699	M1BGU1	ATP-dependent 6-phosphofructokinase
13.6237	13.1295	13.4017	13.2192	13.8495	13.2373	14.1826	13.5909	13.6296	13.5823	13.1827	13.3627	13.861	13.9671	14.0655	13.7359	M1BGV3	4-hydroxyphenylpyruvate dioxygenase
18.6863	18.6703	18.6435	18.6312	18.3988	18.4482	18.4353	18.393	18.6958	18.7651	18.7498	18.7331	18.6483	18.5538	18.6427	18.6406	M1BGY6	Oligopeptidase
18.3569	18.197	18.249	18.2464	18.1103	17.8925	18.0528	18.0396	17.8744	17.7297	17.8466	17.8626	17.5329	17.6847	17.593	17.4959	M1BGZ4	3-oxoacyl-[acyl-carrier-protein] reductase
14.7077	14.4535	14.5692	14.7529	14.5484	14.2006	13.6653	14.3586	13.1485	13.8369	13.1384	13.8097	13.5384	13.8533	13.4878	13.8464	M1BH53	Glycosyltransferase
17.3615	17.1419	17.199	17.3587	17.2578	17.0991	17.0312	17.0719	12.749	13.0382	13.3189	12.7082	13.0195	13.2361	13.2181	13.2669	M1BH63	Acetylornithine deacetylase
17.0251	17.074	16.9843	16.9942	16.743	16.7296	16.7904	16.7555	17.2089	17.2951	17.2204	17.1795	17.0613	17.0653	17.0776	17.0458	M1BH74	Ribonucleoprotein, chloroplast
15.035	15.0109	14.8241	15.5681	14.7735	13.6686	14.1368	14.5313	14.7079	14.6231	14.6927	14.7724	14.9393	14.9901	14.9766	15.1027	M1BHB2	Nodulin-like domain-containing protein
13.4149	13.1215	13.478	13.0315	13.8217	13.4065	13.5218	13.6297	13.7365	13.6018	13.5607	13.6167	13.3647	13.2512	13.4533	13.249	M1BHB8	Alpha,alpha-trehalose-phosphate synthase [UDP-forming] 5;Alpha,alpha-trehalose-phosphate synthase [UDP-forming] 6;Alpha,alpha-trehalose-phosphate synthase [UDP-forming] 6
19.1881	19.3641	19.1465	19.2098	19.0055	19.1712	19.0214	18.9864	19.3649	19.4436	19.4195	19.4136	19.4668	19.45	19.3986	19.4427	M1BHC8	Photosystem II 22 kDa protein, chloroplastic
15.6131	15.6736	15.7222	15.7009	15.7933	15.8317	15.7636	15.8734	15.6263	15.5651	15.5837	15.6042	15.6524	15.6066	15.5902	15.6917	M1BHE9	Aldehyde dehydrogenase
15.5232	15.5114	15.5504	15.5128	15.7297	15.6729	15.6204	15.6616	15.3173	15.4	15.3589	15.3533	15.2361	15.1815	15.1724	15.1673	M1BHF1	Protein disulfide-isomerase
18.6303	18.5611	18.4953	18.521	18.2852	18.3612	18.2254	18.1976	18.4433	18.4008	18.3582	18.4251	18.3421	18.256	18.3418	18.218	M1BHF8	Ribosomal protein L15
16.3481	16.3612	16.2047	16.3311	15.8338	15.6049	15.8685	15.7675	15.8485	15.9785	15.9844	15.9668	15.666	15.5908	15.5926	15.6127	M1BHG8	29 kDa ribonucleoprotein B, chloroplastic
13.1936	13.2703	13.1555	13.1925	13.1404	13.1912	13.2727	13.2347	13.2334	13.4841	13.4195	13.4438	13.3594	13.4941	13.4702	13.3809	M1BHI6	SCP domain-containing protein;Tho1_MOS11_C domain-containing protein
15.1219	15.095	15.3781	15.2543	15.6411	15.4518	15.55	15.6695	15.9375	15.7534	15.5753	15.7631	16.1193	16.2222	16.1871	16.2755	M1BHJ9	Flavonoid glucoyltransferase UGT73E2
16.7555	16.7832	16.6618	16.6236	16.706	16.8124	16.71	16.6158	16.8974	16.858	16.8145	16.76	17.1149	17.076	17.0759	17.1397	M1BHK8	Transmembrane transport protein
15.8987	15.9622	15.8085	15.9514	15.7031	15.921	15.8151	15.5621	15.4792	15.4899	15.4483	15.4466	15.3748	15.4276	15.1725	15.3368	M1BHM1	Transport protein
14.4227	13.8512	14.0446	14.255	14.6252	14.542	14.5528	14.4607	14.6801	14.7732	14.4904	14.8891	15.1804	14.9969	14.8377	14.8477	M1BHQ9	DUF1338 domain-containing protein
14.8273	14.8117	14.5647	14.611	14.565	14.6548	14.3319	14.6403	14.3452	14.2816	14.4408	14.6177	14.3783	14.4604	14.4399	14.4825	M1BHW0	Uncharacterized protein
14.7207	15.0297	14.9433	14.7087	15.2222	15.2643	15.1054	15.3346	15.5707	15.5751	15.4556	15.4621	15.9928	15.8745	15.9725	16.0381	M1BHZ7	4-hydroxyphenylpyruvate dioxygenase
16.2636	16.3353	16.3185	16.3154	16.5708	16.1897	16.3872	16.5357	16.5074	16.3562	16.3829	16.4757	16.4899	16.0849	16.3498	16.4441	M1BI11	Serine/arginine rich splicing factor
17.1673	17.1836	17.1979	17.1114	17.2051	17.2253	17.2352	17.2346	16.9296	17.0137	16.9314	17.0497	16.9589	17.0113	17.0061	17.0392	M1BI71	14-3-3 protein
16.7538	16.7757	16.6049	16.6641	16.8288	16.9162	16.9207	16.8451	15.9922	16.3436	16.0957	16.0786	16.0677	16.1719	16.4311	16.4865	M1BI72	Cytochrome C oxidase polypeptide vib
14.112	14.2407	14.1041	14.1507	13.9923	13.9978	14.1116	14.3845	14.7071	14.3333	14.4009	14.698	14.4775	14.4666	14.4437	14.635	M1BI99	Uncharacterized protein
15.2532	14.0595	12.5093	15.0605	15.3385	15.3502	14.3558	14.4795	14.9927	13.1854	14.2658	14.234	16.0035	15.7564	13.1096	12.7642	M1BIA0	Uncharacterized protein
18.5175	18.5847	18.4468	18.503	18.4549	18.4128	18.4152	18.3738	18.81	18.8502	18.8221	18.7744	18.8857	18.8126	18.8088	18.8464	M1BIE3	Oxidoreductase
15.6905	15.6941	15.5611	15.7091	15.6049	15.4345	15.4808	15.4369	15.3906	15.1599	15.3679	15.3244	15.207	15.2838	15.268	15.267	M1BIF3	Ras GTPase;Sigma-54 factor, interaction region;Ras GTPase;Sigma-54 factor, interaction region
15.0366	14.8537	15.08	14.9634	15.0441	14.8716	14.8387	14.9316	14.857	14.7983	14.7701	14.8613	14.5346	14.6585	14.6824	14.6484	M1BIS3	Ribosomal protein L19
16.1298	16.382	15.9803	15.9479	16.4394	16.5887	16.1954	13.9306	15.5743	14.9979	15.0536	15.3846	15.2363	15.421	15.2517	15.3601	M1BIX8	Reticuline oxidase
15.4393	15.4275	15.5464	15.3844	15.6177	15.5972	15.5284	15.565	15.9248	15.867	15.8364	15.941	16.114	15.9703	16.0646	16.0615	M1BJ21	Poly(RC)-binding protein
18.631	18.6663	18.6754	18.6225	18.7237	18.7377	18.6302	18.5808	18.529	18.4819	18.5076	18.4626	18.5787	18.5302	18.6134	18.5887	M1BJ51	Uncharacterized protein
15.067	15.1417	15.1685	15.1319	15.1685	15.1606	15.0894	15.0624	14.4505	14.3387	14.3379	14.5124	14.5222	14.3828	14.404	14.4768	M1BJA2	Aldose 1-epimerase
16.4226	16.3714	16.3768	16.4174	16.3091	16.3082	16.2921	16.2301	16.5692	16.5884	16.5897	16.5987	16.6969	16.5541	16.5764	16.6093	M1BJG9	D-3-phosphoglycerate dehydrogenase
14.1049	13.9905	14.0809	14.1491	14.1064	14.0591	14.3201	13.9591	14.0754	14.2115	14.2619	14.1814	14.03	14.2704	13.9268	13.7817	M1BJI1	Cytochrome P450 71A4
13.1128	13.2671	13.2783	13.0397	13.5796	13.3804	13.5255	13.5157	13.962	13.8108	13.979	13.9654	13.8905	14.0057	13.9484	14.0272	M1BJJ1	Pantothenate kinase 2
12.0103	12.0006	12.0293	11.9813	12.3032	12.6624	12.3084	12.3261	11.8138	11.8028	11.6475	11.8862	11.7429	11.6784	12.1867	11.9545	M1BJJ2	Iron-sulfur cluster assembly protein
14.859	14.9444	14.909	14.9459	14.5436	14.7516	14.671	14.7252	14.9275	14.8842	14.9789	15.1084	14.979	15.0349	14.9222	15.0332	M1BJJ3	Phosphate/phosphoenolpyruvate translocator
14.5425	14.6745	14.5767	14.4786	14.2017	14.2458	14.0489	14.2597	15.0118	14.7255	14.8316	14.7747	14.5218	14.5246	14.7827	14.6388	M1BJK6	Uncharacterized protein
15.2106	15.2452	15.2315	15.1185	15.3415	15.3364	15.2224	15.3103	14.6888	14.4541	14.5883	14.5759	14.8142	14.8989	14.9098	14.805	M1BJM0	Transporter
17.7818	17.6523	17.6394	17.6421	17.5637	17.5212	17.4483	17.5383	17.5325	17.4664	17.4728	17.4845	17.3305	17.476	17.3863	17.2822	M1BJP4	Ribosomal protein L27a
16.803	16.8429	16.8404	16.8419	16.7798	16.9131	16.873	16.8469	16.954	17.0145	17.0019	16.9828	17.0453	17.0041	16.9359	16.8967	M1BJQ9	Elongation factor Tu
14.5769	14.8052	14.2817	14.6912	14.3456	14.2177	14.2881	14.6821	13.7852	13.1965	14.1644	14.2079	13.5988	12.9549	13.7438	11.0552	M1BJR6	Quinolinate synthase
16.0854	16.1528	16.1412	16.1953	16.1775	16.2235	16.2312	16.2587	16.2616	16.2387	16.2784	16.1246	16.1936	16.3856	16.2799	16.2283	M1BJS5	Cytochrome P450 71A4
16.5861	16.5693	16.6433	16.634	16.6827	16.6536	16.7011	16.6857	16.3463	16.3287	16.3591	16.3786	16.4523	16.4659	16.446	16.4308	M1BJT8	2-C-methyl-D-erythritol 4-phosphate cytidyltransferase
16.2508	16.2685	16.249	16.2562	16.2385	16.2349	16.1846	16.1315	16.1291	15.9253	16.1327	16.0928	16.2293	16.2508	16.1647	16.1381	M1BJV5	Ferric-chelate reductase
15.5515	15.5179	15.5193	15.5721	15.7237	15.7111	15.7088	15.703	15.7283	15.6129	15.7431	15.7602	15.7412	15.7475	15.7216	15.7535	M1BJV6	Eukaryotic translation initiation factor 3 subunit C
15.3475	15.3728	15.3416	15.3081	15.5673	15.5441	15.4871	15.5106	15.6601	15.6502	15.6246	15.6027	15.6405	15.6677	15.6836	15.6091	M1BJW9	Glutamyl-tRNA synthetase
14.1	13.6079	13.9538	14.3059	14.6706	14.4273	14.0979	14.3845	13.6099	14.2928	14.5711	14.4142	14.722	14.652	12.6379	14.4181	M1BJX2	Pectin acetylesterase
15.2126	15.3205	15.2909	15.1378	14.6576	14.8515	14.7027	14.6605	14.9069	14.9244	15.0355	15.1248	14.9674	14.6606	14.8922	14.5272	M1BJX5	Hydrolase
16.6373	16.6557	16.5556	16.4828	16.8993	16.4852	16.6006	16.6113	16.7997	16.9586	16.835	16.7349	17.1652	17.0883	17.1231	17.1164	M1BJX6	GRIP and coiled-coil domain-containing protein
15.6947	15.6335	15.7175	15.7364	15.8154	15.8534	15.7816	15.7486	15.9675	15.8796	15.9871	15.9507	15.9804	15.943	15.8866	15.959	M1BK14	Histidyl-tRNA synthetase
13.3345	13.3929	13.0954	12.6928	12.9561	13.0143	12.1377	12.3053	13.5565	13.7783	13.685	13.7038	13.7446	13.402	13.9053	13.5219	M1BK18	Serine/threonine-protein kinase PBS1
15.9413	15.8531	16.047	15.9832	16.1582	16.0332	16.1079	16.25	15.5355	15.5004	15.5851	15.5811	15.4969	15.7291	15.7507	15.5946	M1BK24	Glutathione transferase
17.3504	17.2692	17.1829	17.0743	17.122	17.244	17.0826	17.0802	16.7229	16.8595	16.7171	16.8848	16.9461	16.9863	17.2216	17.0617	M1BK32	Germin-like protein
16.3367	16.3654	16.3749	16.4187	16.775	16.8079	16.7519	16.7292	16.6926	16.6776	16.7222	16.7607	16.8514	16.9483	16.8983	16.8468	M1BK48	Aspartic protease
14.3638	14.3387	14.5447	14.499	14.5357	14.5542	14.6978	14.6988	14.8556	14.7143	14.8169	14.8457	14.8474	14.8945	14.7231	14.7384	M1BK68	ATP citrate synthase
10.7292	9.57531	13.2848	10.8915	10.6982	10.527	10.745	9.68569	10.8122	8.88542	10.1033	10.4727	11.186	10.0948	12.5328	8.98746	M1BK86	Pre-mRNA splicing factor
15.8696	16.0434	15.9976	15.9464	16.0319	15.9364	16.0224	15.9532	15.9586	16.0265	15.9431	15.8661	15.7482	16.0168	15.9152	15.9073	M1BKA5	Lipoyl synthase, mitochondrial
18.4883	18.4446	18.4467	18.4345	18.2866	18.3037	18.3	18.3215	18.3383	18.2379	18.3096	18.3233	18.2954	18.3732	18.2814	18.26	M1BKB0	Protein THYLAKOID FORMATION1, chloroplastic;Protein THYLAKOID FORMATION1, chloroplastic
16.5692	16.6573	16.5841	16.707	16.5238	16.659	16.603	16.5204	16.2025	16.2183	16.1904	16.3334	16.1506	16.227	16.169	16.2622	M1BKE7	Riboflavin synthase alpha chain
15.9833	15.7803	15.7961	15.8193	14.9604	14.7662	14.945	15.0421	14.896	15.0488	14.9545	15.0597	14.0865	14.2162	14.0349	13.9952	M1BKE9	NADPH-protochlorophyllide oxidoreductase
18.2794	18.5008	18.237	18.2911	18.2967	18.3015	18.2785	18.2162	17.9938	18.1023	17.9926	17.9685	17.8841	17.8634	17.7257	17.7229	M1BKG3	Photosystem II 11 kDa protein
14.934	15.1828	15.1322	15.1526	15.3055	15.0469	15.11	15.1696	15.5917	15.5602	15.5778	15.6292	15.6613	15.483	15.7011	15.7258	M1BKM5	KH domain containing protein
14.3642	14.1122	14.264	14.2257	14.4888	14.3177	14.5185	14.6564	15.5517	15.4956	15.4611	15.5139	15.5651	15.6088	15.7029	15.7351	M1BKP9	Chalcone reductase
17.2673	17.256	17.2072	17.3225	17.1905	17.121	17.1804	17.2092	17.3101	17.1425	17.1968	17.2315	17.2799	17.2185	17.2119	17.2747	M1BKS0	Oxygen evolving enhancer protein 3
16.9713	16.8227	16.8398	16.8569	16.4183	16.4115	16.4744	16.6164	15.9984	15.9402	15.939	16.054	15.8924	16.0892	15.9759	15.8487	M1BKT9	Cinnamyl alcohol dehydrogenase
15.1273	15.1593	15.0833	15.0269	15.0857	14.9018	14.8968	15.0184	15.4089	15.1947	15.3462	15.3186	15.2334	15.2956	15.2315	15.1669	M1BL45	Aldo/keto reductase
15.5832	15.3434	15.5043	15.4551	15.5531	15.4361	15.3788	15.4097	15.5891	15.5603	15.5906	15.6193	15.7133	15.5695	15.5898	15.6636	M1BL46	Probable 6-phosphogluconolactonase
15.482	15.5192	15.588	15.5999	16.4801	16.3375	16.3544	16.2971	14.977	15.1248	14.9173	15.0408	15.5499	15.6709	15.4353	15.6039	M1BL62	Protein yippee-like
18.4606	18.6049	18.5715	18.4998	18.648	18.6163	18.6498	18.6271	18.5655	18.767	18.556	18.5003	18.5447	18.6341	18.7099	18.682	M1BL73	Thylakoid lumenal 17.4 kDa protein, chloroplast
15.1194	15.0271	15.178	15.0836	15.449	15.2844	15.3911	15.4173	15.5014	15.4783	15.4981	15.5257	15.4755	15.5803	15.5421	15.5306	M1BL76	Importin beta-1
15.7902	15.8027	15.7572	15.7674	16.2802	16.2102	16.2301	16.2771	15.3249	15.3669	15.3684	15.3689	15.2578	15.2572	15.2335	15.2658	M1BLB0	Luminal-binding protein 5
17.0335	17.0668	16.9647	16.9714	16.8464	16.9129	16.876	16.8496	17.1437	17.226	17.1859	17.2053	17.1831	17.2696	17.2462	17.261	M1BLB1	Protein-serine/threonine phosphatase
15.8769	15.7992	15.9557	15.9143	15.963	15.8934	16.0867	16.1267	16.0896	15.9182	16.0324	16.0276	15.9743	16.1824	16.0501	16.0002	M1BLC2	Starch synthase, chloroplastic/amyloplastic;Starch synthase, chloroplastic/amyloplastic
15.138	15.0611	15.1156	15.0145	15.0528	15.0321	15.0798	15.0471	15.1335	15.1674	15.1629	15.2115	15.1344	15.1207	15.1478	15.2483	M1BLC9	Cyclin-dependent protein kinase p34cdc2
14.9777	15.0904	14.8912	15.0501	15.006	15.0538	14.9467	14.8883	15.8815	15.9058	15.8713	15.8749	15.6898	15.6494	15.7023	15.6851	M1BLD8	Alcohol dehydrogenase
15.4878	15.4046	15.4988	15.4582	15.6413	15.5057	15.5669	15.6101	14.7379	14.4397	14.6532	14.6806	14.8105	14.8042	14.2799	14.7258	M1BLI3	Carbonyl reductase
14.2037	13.8591	14.0725	14.024	14.0194	13.4688	14.0851	14.0109	13.6994	13.8785	13.7527	13.9774	13.7042	13.8057	13.5576	13.8185	M1BLI5	EIF4B
12.8705	12.7208	12.7626	12.8448	12.9297	12.7656	12.7567	12.7639	13.0806	12.7841	13.2327	12.7767	13.2841	12.9048	12.9044	13.1354	M1BLK5	Binding protein
13.9218	13.7058	13.7592	13.6793	13.8875	13.4734	13.5741	13.6838	13.9571	13.7153	13.8402	14.1313	13.9836	14.1765	14.1739	14.0773	M1BLL7	Protein DETOXIFICATION
18.3935	18.3799	18.3545	18.3772	18.2807	18.3136	18.3067	18.2949	18.7317	18.7222	18.7567	18.7648	18.6331	18.5941	18.6002	18.5859	M1BLM3	AlaT1
16.2826	16.3365	16.2991	16.2944	16.6156	16.4416	16.4522	16.3844	16.9265	16.8978	16.8075	16.7944	16.7571	16.7576	16.8082	16.7966	M1BLN9	Expansin
16.3056	16.2285	16.2998	16.2329	16.454	16.1834	16.27	16.2873	15.3809	15.2359	15.146	15.3668	15.5934	15.4041	15.4451	15.4688	M1BLP4	Erwinia induced protein 1
15.0845	14.816	15.0821	14.7746	15.1133	14.7536	14.6781	14.75	14.734	14.5572	14.6011	14.6222	14.6524	14.715	14.3201	14.5798	M1BLS8	Pentatricopeptide repeat-containing protein
18.8328	18.8515	18.8103	18.8326	18.7677	18.7949	18.7073	18.7266	18.9329	18.8312	18.8959	18.8344	18.8733	18.8533	18.8802	18.8783	M1BLT2	NmrA domain-containing protein
14.0148	14.0788	13.9258	13.773	14.2965	14.2977	14.0682	14.2475	14.2962	14.2728	14.4382	14.427	14.5284	14.2927	14.345	14.3803	M1BLX9	RuvB-like helicase
15.546	15.3955	15.5827	15.6752	15.3227	15.7411	15.5134	15.6124	15.9812	16.2494	16.1913	16.2654	16.0988	16.1423	15.8594	15.7034	M1BLY5	High mobility group protein 2 HMG2
14.334	14.3124	14.4618	14.3833	14.4393	14.5486	14.518	14.3515	13.4434	13.4643	13.2658	13.2887	13.4891	13.4561	13.4913	13.3622	M1BM13	Amidase family protein
15.579	15.4057	15.3965	15.4071	15.2129	15.3514	15.4179	15.2677	15.1231	15.0321	14.9129	14.9607	15.0161	14.9046	14.9846	14.7415	M1BM16	Aldehyde oxidase
16.5417	16.5643	16.5339	16.557	16.7943	16.7328	16.7426	16.7383	16.4324	16.3839	16.395	16.3882	16.5034	16.47	16.4607	16.4833	M1BM43	Acetyltransferase component of pyruvate dehydrogenase complex
15.2682	15.4007	15.2541	15.2348	15.3258	15.4405	15.3096	15.3215	15.5787	15.6665	15.5728	15.708	15.8281	15.7528	15.7258	15.783	M1BM44	Calmodulin-binding protein
14.429	14.2558	14.4121	14.5109	14.6334	14.5765	14.5475	14.621	14.6647	14.8063	14.5795	14.7088	14.7307	14.692	14.7016	14.5438	M1BM64	Ribitol kinase
17.5872	17.6723	17.6682	17.5914	17.5568	17.6364	17.5605	17.5935	17.9342	17.8092	17.8867	17.9857	18.2509	18.3048	18.3161	18.3202	M1BM79	Ammonium transporter
14.9854	14.9413	14.9026	15.001	15.3679	15.3286	15.2366	15.2164	15.0282	15.0138	15.0685	15.096	15.0292	15.1216	15.0558	15.0081	M1BM89	Uncharacterized protein
13.754	14.0925	13.9909	13.9859	13.9947	14.0763	14.0861	13.8226	14.0363	13.9167	14.0087	14.0777	14.267	14.5472	14.2444	14.5141	M1BMA0	LEDI-5c protein
14.3353	14.7225	14.599	14.6077	14.7559	14.7092	14.6302	14.6769	14.3502	14.4253	14.3511	14.1516	14.5603	14.6728	14.6149	14.6485	M1BMA2	LEDI-5c protein
16.2001	16.4029	16.3697	16.3691	16.9825	16.8102	16.7897	16.8622	15.9438	15.9435	15.7597	15.758	16.3519	16.2501	16.1943	16.4263	M1BMA8	LEDI-5c protein
15.5607	15.7188	15.5308	15.4623	16.3016	15.9943	15.9475	16.0439	13.8612	13.6275	13.9193	12.7069	12.483	12.5551	12.9302	12.8095	M1BMB5	Pepper esterase
15.8171	15.865	15.7646	15.8839	15.6859	15.6416	15.6065	15.6657	15.6022	15.5097	15.6145	15.4871	15.4634	15.4456	15.5223	15.5492	M1BMC4	One-helix protein
18.3164	16.1496	15.8206	17.0282	17.3915	18.0066	15.5994	16.0515	15.7507	15.4551	15.6004	15.6988	16.4005	16.4167	14.5019	15.2557	M1BMI0	Uncharacterized protein
17.4497	17.3197	17.5009	17.453	17.6705	17.6258	17.5964	17.74	18.0253	17.7791	17.9317	17.9746	18.2481	18.1845	18.2328	18.2797	M1BMS5	Catechol oxidase
16.5649	16.618	16.6513	16.5671	16.7499	16.8085	16.7187	16.7454	17.025	17.0604	17.0531	17.0628	17.3332	17.2368	17.2829	17.3432	M1BMS6	Catechol oxidase
15.4018	15.4665	15.724	14.9204	15.8282	15.7407	15.9933	15.7987	14.5204	15.9442	15.7303	15.8097	15.435	15.6006	15.6291	15.4591	M1BMT8	Methyltransferase
17.0686	17.067	17.0572	17.1084	17.3399	17.3049	17.3429	17.239	17.0371	17.0861	17.0825	17.0395	17.3221	17.3706	17.2897	17.3505	M1BMY7	Red chlorophyll catabolite reductase
16.0848	16.1771	15.9566	15.9924	15.8808	15.1004	15.345	15.7561	15.2655	14.7607	15.1061	15.2364	14.6387	14.0537	14.5214	14.3908	M1BMZ1	Alpha-L-fucosidase 2
17.8379	17.7758	17.8351	17.9441	17.6206	17.7663	17.5148	17.7369	17.6643	17.6734	17.7141	17.7366	17.4405	17.444	17.633	17.5507	M1BMZ7	DUF1995 domain-containing protein
17.4549	17.3	17.4125	17.487	17.5289	17.4728	17.6257	17.6442	17.3986	17.4138	17.4038	17.4273	17.1883	17.3232	17.2559	17.0929	M1BN40	Cysteine proteinase 3
14.7905	14.9436	14.9231	14.8665	14.6716	14.5662	14.5234	14.8049	14.9549	14.5476	14.9017	14.7416	14.7775	14.7149	14.859	14.642	M1BN59	Uncharacterized protein
15.688	15.6704	15.602	15.6693	15.4022	15.4457	15.5143	15.4503	15.546	15.5437	15.5949	15.6036	15.3145	15.3246	15.2904	15.1825	M1BN71	UDP-sulfoquinovose synthase
15.6807	15.6229	15.7423	15.6807	16.1578	16.1006	16.1186	16.0348	16.0932	16.0338	16.1108	16.0939	16.1356	16.2392	16.1525	16.1102	M1BN80	Amine oxidase
15.261	15.6386	15.3061	15.3001	15.6447	15.7669	15.6598	15.5622	15.2087	15.3298	15.2182	15.2151	15.3781	14.9645	15.1604	15.3553	M1BN82	Adenylate kinase
15.9636	15.4856	15.2273	15.7961	14.6195	15.3941	14.495	14.7597	14.231	13.6035	13.4473	14.1985	14.0223	13.5088	13.9066	13.3559	M1BNB7	Protein DETOXIFICATION;TRANSPARENT TESTA 12 protein
14.652	14.1712	13.879	14.6634	14.4871	14.3863	14.4404	14.5384	15.1522	14.924	14.9791	15.1598	15.3163	15.3331	15.1464	14.8282	M1BND7	Rhodanese domain-containing protein
19.505	19.5278	19.5161	19.5018	19.3082	19.3479	19.393	19.3411	19.4182	19.5741	19.4158	19.5057	19.3981	19.4638	19.4195	19.4014	M1BNH8	Ribulose bisphosphate carboxylase/oxygenase activase, chloroplastic
18.7786	18.7929	18.7712	18.7501	18.5737	18.6305	18.5909	18.5425	18.3356	18.3438	18.3369	18.3687	18.3791	18.327	18.2695	18.3193	M1BNJ2	Dihydroxy-acid dehydratase
14.1031	14.5932	14.6058	13.9699	13.9083	14.0922	13.5292	14.419	15.9037	15.7476	15.9206	15.9055	15.8615	15.784	15.793	15.8116	M1BNL7	Phosphoinositide phospholipase C
17.0526	16.9581	16.9994	17.0411	16.9142	16.6882	16.8652	16.9269	17.036	16.7321	16.9499	16.978	16.8381	16.8074	16.8395	16.8563	M1BNN3	D-fructose-1,6-bisphosphate 1-phosphohydrolase
16.6606	16.4	16.5392	16.4645	16.2631	16.2649	16.3838	16.4031	16.376	16.0537	16.2692	16.3205	16.3803	16.3652	16.4179	16.4181	M1BNN4	D-fructose-1,6-bisphosphate 1-phosphohydrolase
16.1993	16.1804	16.2186	16.2874	16.2381	16.3536	16.3456	16.2245	15.5593	15.7505	15.7457	15.8046	15.6648	15.6249	15.7767	15.8207	M1BNQ0	Mitochondrial import inner membrane translocase subunit Tim9
18.034	18.0274	18.0187	18.0365	18.2073	18.1559	18.1515	18.1397	18.0395	17.9979	18.0341	18.0588	18.0526	18.0337	17.998	18.0272	M1BNR4	Heat shock cognate 70 kDa protein 2
17.0157	17.0627	16.9399	16.9739	16.924	16.9222	16.8444	16.8458	17.0083	17.1057	17.0247	17.0915	17.1182	16.9973	17.0885	17.1169	M1BNR5	ALY protein
12.8454	12.8333	13.5995	12.4719	12.9002	12.5132	12.7363	12.9401	12.5783	12.5159	12.5105	12.3302	12.7173	12.5308	12.2836	12.5027	M1BNX5	Structural molecule
16.2282	15.9471	15.8682	15.9945	15.2322	15.2539	15.0202	15.2442	14.2562	13.9999	14.2073	14.2885	12.5436	12.7832	11.9743	12.6834	M1BNZ1	Pectinesterase
17.513	17.5157	17.6132	17.6488	18.1057	18.0324	18.13	18.121	17.7286	17.7407	17.7259	17.7887	17.2572	17.2965	17.2472	17.029	M1BNZ3	Thiamine thiazole synthase, chloroplastic
15.2353	15.1514	14.8107	15.0618	15.1946	15.1907	15.2564	15.2786	15.179	15.1012	15.1678	15.2106	15.2546	15.1316	14.98	15.2017	M1BNZ6	Uncharacterized protein
17.0045	16.9282	16.9425	16.9784	16.5529	16.6095	16.7088	16.6513	16.8034	16.7801	16.8675	16.8574	16.6897	16.5739	16.6204	16.6071	M1BP06	50S ribosomal protein L24, chloroplastic;50S ribosomal protein L24, chloroplastic
15.6366	15.7953	15.6352	15.4636	15.5098	15.6356	15.3473	15.3862	15.5386	15.6919	15.5483	15.4993	15.7975	15.6209	15.7867	15.8162	M1BP26	Uncharacterized protein
16.8552	17.0265	16.8937	16.8789	17.0377	17.1058	17.0625	17.0143	16.8556	16.9397	16.8385	16.8491	16.9061	16.9086	16.9281	16.9279	M1BP60	NADH-ubiquinone oxidoreductase 24 kDa subunit, mitochondrial
14.6786	14.7796	14.6195	14.665	14.5003	14.7633	14.6306	14.491	14.9085	14.9737	14.8143	14.9902	15.2908	15.5784	15.0735	14.9933	M1BP63	Histone H2A
15.4901	15.2015	15.3935	15.4226	15.3506	15.0393	15.0557	15.1711	16.015	15.7848	15.9498	15.9455	15.9038	15.8259	15.9277	15.9741	M1BP65	2-methyl-6-phytylbenzoquinone methyltranferase
16.4958	16.4409	16.3742	16.4391	16.1067	16.0023	16.0489	15.8811	15.8565	15.8953	15.9352	15.9737	16.0315	15.984	15.9762	15.9915	M1BPD1	Chlorophyllase 2
18.3134	18.384	18.2246	18.2238	18.2565	18.29	18.1938	18.0733	18.2058	18.2498	18.176	18.2663	18.1359	18.1757	18.1233	18.1181	M1BPE5	40S ribosomal protein S24
17.2291	17.3084	17.2259	17.2131	17.2989	17.3739	17.3756	17.3181	17.1216	17.2006	17.1253	17.073	17.1842	17.2524	17.1572	17.1495	M1BPE8	Ribosome-recycling factor, chloroplastic
14.1649	14.4205	15.6278	13.4306	13.4387	13.9949	12.55	14.7748	13.3783	14.4454	13.9964	11.7414	14.0524	13.9581	13.4502	13.863	M1BPF7	Permease I
14.1434	14.5123	14.2789	14.0139	14.1815	14.3321	14.3668	14.6317	12.3301	12.7011	11.7637	12.4614	11.4715	11.7831	12.6501	12.9236	M1BPP2	Calcium ion binding protein
16.6946	16.8463	16.8392	16.7501	17.3277	17.4696	17.3284	17.3726	14.5676	14.8491	14.2752	14.9693	15.5089	15.603	15.7579	14.7656	M1BPP7	Pathogen-and wound-inducible antifungal protein CBP20
15.0296	14.9601	14.9798	15.1024	14.9905	15.074	14.9845	14.8463	13.0085	13.2317	13.7149	11.8617	13.487	13.6279	10.6743	12.9289	M1BPR3	Annexin 11
16.1818	16.2771	16.2407	16.2555	16.1198	16.1278	16.2043	16.1772	16.381	16.442	16.3895	16.3524	16.442	16.5723	16.5075	16.5024	M1BPR5	Ribose-5-phosphate isomerase
15.278	15.2839	15.3769	15.242	15.5363	15.1983	15.3769	15.4771	15.2503	15.0257	15.1389	15.2248	15.0151	14.9646	15.0676	15.2412	M1BPR6	Thioredoxin 1
16.4683	16.5734	16.596	16.5351	16.6143	16.6351	16.4861	16.5689	16.0968	16.3805	15.7407	16.213	16.1948	16.2458	16.2247	16.1655	M1BPS0	Tha4 protein
16.1929	16.2412	16.0794	16.0207	16.2796	16.3194	16.1842	16.22	15.7653	16.1588	15.7857	15.9325	15.9138	16.045	15.9558	16.033	M1BPS9	NFU4 (NFU domain protein 4)
14.7202	14.7381	14.9866	14.8576	14.8898	14.7455	14.6719	14.5765	13.7865	14.141	14.0155	13.6866	13.4118	13.3634	13.6585	13.0106	M1BPU5	Copper chaperone
13.4474	13.4877	13.5144	13.4433	13.4457	13.3964	13.2808	13.4466	14.0745	13.7867	14.0175	14.0309	13.9863	13.9442	13.9665	13.9854	M1BPX4	Alkaline/neutral invertase
15.0226	15.1105	14.8805	15.113	15.2297	15.1828	15.1118	15.2023	14.8927	15.0065	14.8852	15.0295	15.129	14.9861	15.1224	15.1716	M1BPY1	Vesicle transport v-SNARE 11
19.2922	19.5033	19.3293	19.2713	19.2564	19.3975	19.3076	19.2084	19.2527	19.5892	19.3073	19.3139	19.3563	19.3726	19.4826	19.3782	M1BPZ2	Chlorophyll a-b binding protein, chloroplastic
17.6726	17.5316	17.4494	17.4795	16.8749	16.8322	16.888	16.8698	17.2308	17.209	17.2815	17.2242	16.6872	16.6598	16.652	16.6352	M1BPZ4	Geranylgeranyl reductase
16.9101	16.9714	16.8971	16.9106	16.7742	16.7143	16.7755	16.7809	16.9454	16.8728	16.9426	16.9218	16.9007	16.8735	16.8536	16.879	M1BPZ5	Malate dehydrogenase
18.1377	18.1526	18.2359	18.2484	17.8862	17.9919	18.0951	18.0524	17.8462	18.0506	17.8669	17.909	17.7087	17.8203	17.74	17.7453	M1BQ11	Pentose-5-phosphate 3-epimerase;Ribulose-phosphate 3-epimerase, chloroplastic (Fragment)
13.19	13.1641	13.1631	13.2841	13.5217	13.2185	13.0967	13.4314	12.5615	11.4376	11.3593	11.1091	11.0037	11.4061	11.9153	11.7254	M1BQ31	AB hydrolase-1 domain-containing protein
17.9157	17.8754	17.7734	17.8405	17.8662	17.8554	17.7894	17.7174	17.684	17.6535	17.6744	17.6374	17.6224	17.5199	17.5157	17.5714	M1BQ50	Ribosomal protein
15.479	15.4386	15.542	15.4531	15.4885	15.3571	15.5586	15.4548	15.1268	15.2185	15.1336	15.1798	15.2107	15.2459	15.1382	15.0978	M1BQ55	Uncharacterized protein
16.2072	16.1757	16.2387	16.0038	16.1442	16.1005	16.0795	15.9656	16.3527	16.3969	16.3501	16.4185	16.6225	16.4375	16.5315	16.4811	M1BQ63	Carbon-nitrogen hydrolase family protein
18.792	18.8671	18.7543	18.75	18.7943	18.8353	18.7626	18.7293	18.86	18.9007	18.8906	18.8095	18.8846	18.821	18.8792	18.8526	M1BQ72	APE1
15.3087	15.2997	15.3212	15.2305	15.2797	15.2486	15.1742	15.2503	15.2564	15.2569	15.2347	15.3647	15.3883	15.5298	15.3559	15.4845	M1BQ77	14-3-3;14-3-3;14-3-3-like protein
13.0766	13.511	13.4168	13.2759	13.4668	13.6645	13.6458	13.797	13.8346	13.9158	13.8628	13.7737	13.6978	13.7084	13.878	13.7732	M1BQ94	Importin beta-1
13.8196	14.0807	13.826	13.8208	13.7268	13.7174	13.5832	13.608	13.8531	14.0677	13.8448	14.1469	14.0072	13.8193	13.8796	13.886	M1BQB3	Nucleic acid binding protein
16.45	16.5082	16.4554	16.3981	16.5083	16.6195	16.4994	16.4389	15.911	15.7902	16.0649	16.0482	15.4967	15.1844	15.1064	15.1077	M1BQC2	Pectinesterase
14.5962	14.7948	15.0629	14.7996	14.6376	14.6815	14.4682	14.4	15.1494	14.9218	15.3268	15.3525	15.2283	15.1359	15.4027	15.0958	M1BQD2	OJ991214_12.13 protein
16.5693	16.452	16.4692	16.487	16.5446	16.5629	16.4249	16.5333	16.3853	16.2392	16.3506	16.3439	16.4165	16.3969	16.3438	16.3736	M1BQD4	OMPdecase
18.2862	18.2206	18.1132	18.173	17.8262	17.9155	17.8395	17.7924	18.0262	18.0205	17.9807	17.9729	17.862	17.7531	17.7689	17.7691	M1BQF5	50S ribosomal protein L27, chloroplastic
15.6697	15.6259	15.6125	15.6117	15.6993	15.7623	15.7662	15.6928	15.7585	15.7581	15.7059	15.6107	15.7125	15.6596	15.6378	15.6969	M1BQG8	Chaperonin containing t-complex protein 1, beta subunit, tcpb
15.1349	15.1774	15.1063	15.1243	15.3683	15.39	15.2569	15.3933	15.1668	15.0843	15.1307	15.074	15.138	15.1948	15.0305	15.1421	M1BQI0	UDPG glucosyltransferase
16.6171	16.6098	16.5859	16.6637	16.6169	16.569	16.6656	16.596	16.6935	16.7035	16.7251	16.6616	16.7283	16.6875	16.6482	16.7366	M1BQI2	Heat shock protein 90
15.5525	15.6246	15.7002	15.7299	15.9906	15.9417	16.0749	16.0165	16.0439	16.034	16.037	16.0544	16.0822	16.0186	16.0225	16.1154	M1BQM8	Cell division cycle protein 48 homolog
13.9231	13.9499	13.708	13.7362	13.6242	13.3858	13.3621	13.4349	14.6139	14.5496	14.582	14.7674	14.4977	14.7296	14.5463	14.8061	M1BQM9	Elongation factor 1-alpha
15.6882	15.7099	15.7326	15.6789	15.8833	15.9061	15.7977	15.8452	15.924	15.8267	15.8661	15.8507	15.9679	15.9469	15.9859	15.9532	M1BQR5	26S proteasome subunit RPN5b
15.9814	16.002	15.9669	15.9946	16.1324	16.0416	16.0953	16.1551	16.005	16.0441	15.9957	16.0326	16.0221	16.0703	16.1397	16.1343	M1BQT9	Protease C56
15.3685	15.4682	15.2671	15.2881	15.8258	15.7505	15.5528	15.7204	14.9942	15.1112	15.0889	15.0651	15.204	15.3291	15.3103	15.2561	M1BQV8	Microsomal glutathione s-transferase
16.4557	16.4712	16.5117	16.5175	16.3656	16.4352	16.4274	16.4639	16.5709	16.6199	16.5694	16.5905	16.5989	16.5685	16.5601	16.534	M1BR77	Uncharacterized protein
17.7959	17.8027	17.869	17.8062	17.7879	17.6494	17.7655	17.7684	17.9311	17.924	17.9483	17.9124	18.0972	18.1321	18.1222	18.1222	M1BRE6	Chitinase
15.8708	15.8358	15.8239	15.874	15.8632	15.839	15.7724	15.8707	16.0006	15.9409	15.9899	15.9154	15.9377	15.8996	15.8688	15.9806	M1BRF5	ABC transporter E family member 2
16.1192	16.0409	16.1144	15.9865	15.9848	16.0761	16.0205	15.9785	16.1397	16.1728	16.0944	16.0899	16.0214	15.9253	16.1019	16.02	M1BRF8	Thaliana 60S ribosomal protein L7
16.6626	16.631	16.8807	16.6312	16.6256	16.6124	16.7246	16.7928	17.173	17.184	17.1176	17.4069	17.3289	17.3955	17.263	17.3055	M1BRI8	Histone H1
12.6887	12.2723	12.6714	12.6196	12.472	12.5644	12.6035	12.7199	13.3803	13.6357	13.4423	13.3067	13.5084	13.1004	13.6194	13.4427	M1BRK9	RNA binding protein
16.2622	16.0725	16.3239	16.1729	16.1078	16.2995	16.2324	16.2314	16.6661	16.5737	16.6335	16.9671	16.8108	16.7747	16.6883	16.6793	M1BS06	Histone H1
14.6537	14.718	14.4673	14.5777	14.6109	14.7261	14.682	14.6152	14.8003	15.0261	14.6941	14.8121	14.9516	14.9265	14.9021	15.0253	M1BS08	Poly(RC)-binding protein
15.6335	15.5466	15.495	15.6254	15.6176	15.602	15.5384	15.5677	15.6256	15.4722	15.5471	15.4831	15.2832	15.313	15.2127	15.3156	M1BS31	Glycolipid transfer protein
16.64	16.6437	16.6518	16.6694	16.624	16.6909	16.7515	16.7216	16.5195	16.6712	16.5535	16.5792	16.4538	16.5102	16.5149	16.5249	M1BS39	Glutaredoxin S12
15.3416	15.1228	15.1905	15.2219	14.5931	14.6856	14.6158	14.9021	14.6662	14.6605	14.7487	14.7023	14.5243	14.8804	14.6212	14.772	M1BS46	Zinc finger protein
15.456	15.4856	15.4545	15.4353	15.5204	15.5765	15.5502	15.5576	15.6282	15.6776	15.6256	15.66	15.7046	15.689	15.6911	15.7703	M1BS90	Peptidylprolyl isomerase
14.4137	14.2551	14.3707	14.4094	14.2639	14.1827	14.0772	14.1864	14.2737	14.1233	14.2734	14.3412	14.0188	14.3211	13.836	14.0269	M1BS91	40S ribosomal protein S8
16.7432	16.4136	16.5184	16.6465	16.7668	16.5816	16.5301	16.675	13.6216	13.4309	13.5826	13.681	13.5241	13.6947	13.5017	13.4718	M1BSA4	Carboxypeptidase
14.997	14.9677	15.1323	14.9665	15.0145	14.764	14.8935	14.9435	15.7176	15.9866	15.7722	15.6948	15.839	15.8506	15.7454	15.6252	M1BSC7	Chalcone isomerase
15.7196	15.6336	15.5758	15.5564	15.6324	15.4792	15.6356	15.511	15.5888	15.648	15.4195	15.7052	15.6383	15.628	15.5559	15.6498	M1BSD7	Small nuclear ribonucleoprotein Sm D1
17.3529	17.3322	17.2504	17.3421	17.2564	17.2034	17.1573	17.2745	17.0886	17.0651	17.0147	17.0702	16.913	16.9564	16.8977	16.9044	M1BSG3	Glycoprotein
16.2678	16.3575	16.3258	16.3286	16.6795	16.5963	16.5974	16.5882	16.2999	16.3398	16.2951	16.2933	16.4459	16.4503	16.4651	16.5034	M1BSG4	Succinate--CoA ligase [ADP-forming] subunit beta, mitochondrial
14.5416	14.3467	14.4625	14.5319	14.5294	14.5005	14.6285	14.4325	14.7156	14.4737	14.5772	14.508	14.6461	14.5777	14.5747	14.2951	M1BSG7	Ras-GTPase-activating protein-binding protein
16.6674	16.5929	16.5734	16.604	16.7143	16.5154	16.6438	16.7403	16.5332	16.7754	16.615	16.6469	16.6136	16.671	16.6848	16.5694	M1BSI8	RNA binding protein
16.9438	16.8781	16.904	16.9157	17.1625	17.1212	16.9947	17.0666	16.825	16.6584	16.7506	16.7781	16.9262	16.9795	16.8666	16.8323	M1BSN6	Mitochondrial phosphate carrier protein
18.2041	18.3654	18.3142	18.1548	18.3174	18.2902	18.4053	18.3616	17.9846	18.2479	17.9268	18.0007	17.9344	18.0703	17.9981	18.0317	M1BSN9	Translocon-associated protein subunit beta;Translocon-associated protein beta family protein
15.8613	15.4604	15.7912	15.7351	15.8335	15.4675	15.5964	15.8252	15.5724	15.4639	15.6756	15.5632	15.3867	15.5524	15.5469	15.597	M1BSR0	Nodulin family protein
15.865	15.8839	15.808	15.8405	15.6879	15.5945	15.7255	15.6383	16.2449	16.2816	16.2518	16.1295	16.3855	16.2416	16.3703	16.1945	M1BSR3	Sulfite oxidase
14.9058	15.1437	15.0432	15.1501	15.312	15.1088	15.1675	15.2975	14.7244	14.6981	14.7292	14.7617	14.978	14.6901	14.9211	14.966	M1BST6	Cytochrome C1;Cytochrome c1-2, heme protein, mitochondrial (Fragment)
15.7996	15.8213	15.8408	15.8479	15.9207	15.9713	15.8784	15.9485	15.6814	15.5807	15.6295	15.6205	15.6516	15.6474	15.609	15.6007	M1BSV4	Acetyl-CoA synthetase
15.791	15.8863	15.7645	15.8599	15.662	15.8124	15.6507	15.621	15.3953	15.4263	15.4151	15.2211	15.514	15.0971	14.9704	15.2077	M1BSW8	Shikimate kinase
16.2685	16.4295	16.3388	16.3526	16.7624	16.6931	16.5273	16.7632	16.559	16.6838	16.5884	16.5947	16.5961	16.5181	16.6442	16.782	M1BT01	Nuclear transport factor
15.6322	15.5683	15.4197	15.5057	15.0775	15.035	15.0582	15.279	14.4804	15.0252	14.82	14.6968	12.8812	14.1595	14.372	14.3275	M1BT07	Sua5
14.3772	14.2368	14.1886	14.347	14.2721	14.2598	14.3796	14.4336	14.1968	14.2628	14.1103	14.304	14.3688	14.1116	14.0943	14.2725	M1BT09	Mitochondrial import receptor subunit TOM20
14.5932	14.6488	14.5962	14.501	15.0991	15.0719	14.9203	14.982	14.4835	14.5333	14.459	14.4912	14.4917	14.5337	14.5301	14.4538	M1BT30	Glucose-6-phosphate 1-dehydrogenase;Glucose-6-phosphate 1-dehydrogenase, cytoplasmic isoform
14.8836	14.8335	15.0371	14.8636	15.1574	14.8764	15.0409	15.0419	14.5511	14.6764	14.5525	14.6504	14.5944	14.7118	14.3026	14.6598	M1BT43	MLO-like protein
16.8565	16.7509	16.806	16.8104	16.8358	16.5703	16.6542	16.7875	16.7728	16.4892	16.6645	16.6801	16.639	16.5371	16.6368	16.5985	M1BT46	Uncharacterized protein
16.1393	16.1242	16.227	16.1652	16.4275	16.3098	16.373	16.3632	16.2319	16.1981	16.1784	16.2018	16.4607	16.4209	16.399	16.4231	M1BT60	CBS domain-containing protein
15.8457	15.9286	15.9154	15.8807	16.1065	16.015	16.0536	16.1108	16.6404	16.6523	16.5829	16.5965	16.7006	16.7101	16.7381	16.7393	M1BT61	Succinic semialdehyde reductase isofom1
15.3129	15.1958	15.3315	15.1921	15.3345	14.7871	15.1766	15.1972	15.0203	14.9946	14.9779	15.0845	15.0345	14.9889	14.8736	14.9655	M1BT68	Ribosomal protein L5
14.6755	15.7668	14.6895	14.1604	15.236	15.6598	15.7754	15.9093	14.5689	13.5524	14.453	13.4562	13.8202	13.1133	13.8715	13.0749	M1BT76	Glycosyltransferase
15.4231	15.693	15.5412	15.4774	15.5577	15.6475	15.5019	15.4321	15.5739	15.7223	15.4911	15.4623	15.7415	15.5946	15.7645	15.7301	M1BT79	Uncharacterized protein
14.0678	14.3113	14.2839	14.2352	14.5169	14.6574	14.2902	14.3183	14.3262	14.2352	14.3481	14.442	14.2668	14.3071	14.3493	14.109	M1BT85	60S ribosomal protein L18a
14.9444	14.7503	14.9221	14.9533	14.9238	14.7304	14.9137	15.0458	15.0039	14.8231	14.9748	14.9229	14.7944	14.7815	14.6763	14.7856	M1BT92	Acetyl-CoA carboxytransferase
14.115	14.102	14.2219	14.2658	14.6803	14.4359	14.3882	14.4772	14.876	14.7401	14.822	14.7956	15.0153	15.1481	15.0831	15.0975	M1BTA3	Uncharacterized protein
17.2916	16.7484	17.187	17.201	17.029	17.0595	16.4268	16.7811	17.2349	16.8266	14.9109	16.9021	17.2305	17.153	17.1334	17.2303	M1BTE2	Ubiquitinyl hydrolase 1
16.3288	16.284	16.3465	16.0979	16.6406	16.5795	16.64	16.5398	16.1153	16.0574	16.0772	16.1179	16.1247	16.3512	16.3486	16.1701	M1BTE7	Mitochondrial uncoupling protein
20.0676	20.0979	20.0635	20.068	20.028	20.1204	20.0359	20.0017	20.155	20.1263	20.11	20.1541	20.2012	20.1799	20.1666	20.1208	M1BTG2	D-fructose-1,6-bisphosphate 1-phosphohydrolase
16.7538	16.8355	16.8355	16.6367	16.955	16.964	16.8618	16.9111	16.4565	16.4281	16.3874	16.3731	16.3555	16.4448	16.4884	16.4001	M1BTN1	Aspartate aminotransferase
15.8363	15.7185	15.7211	15.814	15.6603	15.674	15.6741	15.6795	15.3119	15.2743	15.2849	15.2575	14.7495	14.9038	14.765	14.7345	M1BTN7	Phosphoenolpyruvate carboxylase
17.3591	17.3576	17.4006	17.333	17.4571	17.5131	17.5601	17.4992	17.5179	17.7434	17.4837	17.6392	17.7196	17.7267	17.7169	17.7412	M1BTP6	14-3-3 protein
16.1438	16.1107	16.0889	16.1107	15.6824	15.6051	15.702	15.7245	15.4966	15.4843	15.5195	15.4999	15.3571	15.3381	15.2482	15.3851	M1BTT7	Ketol-acid reductoisomerase
14.0385	13.9856	13.9683	14.2691	14.0926	14.1043	13.9685	13.9496	13.8951	14.0114	14.2209	14.2729	14.4236	14.5765	14.0654	14.1852	M1BTV6	Alba domain-containing protein
19.0353	19.0122	18.9707	18.9579	19.0178	18.9031	18.9166	18.8456	18.8045	18.8612	18.9154	18.8293	18.9679	18.9264	18.9067	18.797	M1BTW9	ATP synthase subunit b', chloroplastic;ATP synthase subunit b', chloroplastic
15.492	15.5201	15.6152	15.5596	15.6903	15.7306	15.6895	15.6882	14.5052	14.158	14.497	14.029	14.3594	14.3131	14.2445	13.8968	M1BTX4	Isoflavone reductase homolog
16.809	16.7948	16.7765	16.7975	16.8662	16.8734	16.8624	16.847	17.057	16.987	17.0116	17.1023	17.1422	17.108	17.0099	17.0935	M1BTY2	DEAD-box ATP-dependent RNA helicase 56
16.4112	16.3102	16.3514	16.2993	16.5641	16.5155	16.4866	16.4226	16.3201	16.4483	16.2909	16.2981	16.1623	16.3007	16.2787	16.0632	M1BTZ0	Nuclear RNA binding protein
16.3379	16.3262	16.3336	16.3563	16.3217	16.2594	16.2159	16.2107	16.4925	16.2664	16.4383	16.4154	16.512	16.4887	16.5523	16.559	M1BU13	Protein sufD
15.4147	15.0134	15.5012	15.5338	15.8005	15.7032	15.6978	15.743	15.9493	15.8458	15.8163	15.9666	15.7117	15.7145	15.8469	15.728	M1BU14	AP47/50p
17.1467	17.0409	17.1092	17.1086	17.146	16.8385	17.1861	17.2649	18.6417	18.7638	18.6577	18.6755	18.6428	18.8585	18.8383	18.8379	M1BU30	Glycine cleavage system H protein
14.6675	14.8354	14.9316	14.7995	15.3607	15.3119	15.3729	15.4728	15.3824	15.3443	15.2073	15.3355	15.4373	15.5638	15.3927	15.3432	M1BU82	E1 ubiquitin-activating enzyme
16.1752	16.1749	16.3115	16.4206	16.6008	16.5672	16.5258	16.7707	16.3062	16.2403	16.1924	16.3787	16.3797	16.6009	16.5406	16.5809	M1BU84	Gamma interferon inducible lysosomal thiol reductase family protein
15.9076	16.0691	15.877	15.8993	15.6781	15.8203	15.8983	15.7674	15.8425	15.9471	15.9687	15.9451	15.9291	16.0288	15.9766	15.9783	M1BU85	Protein phosphatase
17.752	17.725	17.6864	17.6695	17.6552	17.7127	17.5374	17.626	17.6462	17.7007	17.6726	17.702	17.5503	17.5385	17.5515	17.5238	M1BU94	40S ribosomal protein S26
14.6364	14.7481	14.5684	14.4612	15.0469	14.7527	14.8623	15.0248	14.1348	14.0142	14.3049	14.208	14.3059	14.0033	14.3051	14.2617	M1BUB0	Selenium-binding protein
14.6902	14.6129	14.6589	14.6706	14.7762	14.8004	14.8523	14.7094	14.6542	14.5721	14.8646	14.6115	14.6071	14.6691	14.6787	14.6102	M1BUC8	4-coumarate--CoA ligase
16.9358	16.5656	16.971	16.9212	16.5845	16.5384	17.0142	16.9081	16.986	17.012	17.0858	16.9894	16.937	17.2995	17.1927	17.2713	M1BUH4	Elicitor-inducible protein EIG-J7
14.8783	14.6352	14.8609	14.7875	14.6713	14.5095	14.4349	14.7813	14.6413	14.4125	14.61	14.5407	14.3856	14.6877	14.7064	14.7338	M1BUI8	40S ribosomal protein S8
15.7373	15.739	15.7529	15.6861	15.9316	15.7416	15.9412	15.9483	15.4268	15.5455	15.4379	15.5086	15.5293	15.5588	15.5252	15.594	M1BUJ0	Ferredoxin
16.1145	15.9645	16.1913	15.9269	15.5442	15.2944	15.5781	15.6566	15.517	15.616	15.6227	15.6737	15.2564	15.2308	15.326	15.4064	M1BUJ8	Uncharacterized protein
14.921	15.6386	15.1918	15.3084	15.0528	15.4049	15.4288	15.4539	14.5678	15.2361	14.9549	15.0817	15.0633	14.9709	14.9425	14.9409	M1BUM3	Ribosomal protein L5
15.4983	15.6369	15.5505	15.5223	15.5994	15.5756	15.5724	15.5635	15.5974	15.4179	15.5955	15.4819	15.6069	15.5321	15.548	15.5301	M1BUX5	Glycine/D-amino acid oxidases
14.7236	14.6476	14.5168	14.6975	15.1017	15.0608	15.1737	15.0921	15.1856	15.2425	15.2306	15.1663	15.2728	15.2613	15.1836	15.2785	M1BUY1	Methionine S-methyltransferase
16.2515	16.1499	16.2098	16.2616	16.2606	15.8864	16.1033	16.2946	16.2491	15.9772	16.2042	16.2624	16.0833	15.9586	15.9376	16.0628	M1BV84	40S ribosomal protein S8
16.7892	16.7514	16.7049	16.6924	16.637	16.6508	16.6102	16.5874	16.57	16.5529	16.5705	16.5591	16.4884	16.3843	16.4167	16.482	M1BV98	Thaliana 60S ribosomal protein L7
14.169	13.7981	14.1478	14.2046	13.964	13.8366	14.0816	13.9647	14.296	14.1905	14.2106	14.2459	14.126	14.3862	14.2436	14.2212	M1BVA8	AICAR transformylase
15.3039	15.353	15.459	15.407	15.638	15.6445	15.7495	15.7187	16.011	15.9489	15.9449	16.0186	16.4248	16.4723	16.5049	16.51	M1BVA9	Uncharacterized protein
16.5718	16.5123	16.5808	16.564	16.9372	16.8066	16.8085	16.8315	16.1792	16.2463	16.1865	16.1697	16.1033	16.2148	16.1088	16.127	M1BVI5	SGT1
15.0807	14.9216	14.7076	14.9913	14.8732	14.7052	14.6415	14.2734	15.4732	15.3957	15.5032	15.6587	15.4038	15.5975	15.0203	15.1544	M1BVL0	Plasma membrane intrinsic protein;Plasma intrinsic protein 2,1
14.0075	13.7682	14.1386	14.0968	14.5035	14.3556	14.272	14.5043	14.8816	14.7647	14.8336	14.7737	14.8561	14.8228	14.6972	14.7703	M1BVP9	Myosin XI
15.5704	15.5184	15.4722	15.3754	15.4633	15.2795	15.3467	15.3336	15.4584	15.4155	15.361	15.5087	15.5165	15.4646	15.3815	15.473	M1BVW9	Mago nashi 2
17.9634	18.0797	17.9037	17.9573	17.9566	18.1294	18.1489	18.0098	18.1984	18.2789	18.2134	18.2374	18.3995	18.3098	18.2076	18.3065	M1BVX1	Protein-methionine-S-oxide reductase
15.7183	15.5635	15.258	15.4475	15.7007	15.6156	15.647	15.6211	14.8101	14.527	14.7717	14.3697	14.8074	14.3292	14.929	14.9517	M1BW31	Plastoglobulin-1, chloroplastic;Plastoglobulin-1, chloroplastic
16.7889	16.8209	16.7937	16.7608	16.7552	16.6776	16.629	16.756	16.8016	16.7763	16.8347	16.774	16.9619	16.8866	17.0291	16.9951	M1BW52	Alpha/beta hydrolase
14.4577	14.5556	14.5848	14.6944	15.1008	14.3604	14.8336	15.094	13.5695	13.5209	13.5321	13.4379	13.1308	13.5023	13.2406	13.3522	M1BWB5	Hsr203J
13.0334	12.9961	12.7701	13.0794	13.6564	13.3836	12.8633	13.5035	13.1574	12.8788	12.927	12.8851	13.4389	13.3673	13.0469	13.3107	M1BWC5	AAA ATPase
15.6118	15.6389	15.5535	15.5754	15.2048	15.3067	15.2037	15.2908	15.5818	15.6975	15.546	15.5713	15.3427	15.455	15.4363	15.3996	M1BWD0	Ribose-5-phosphate isomerase
16.1624	16.0658	16.015	15.9092	16.1482	16.1122	16.0321	16.1807	15.5212	15.7688	15.5929	15.8416	15.2655	15.5914	15.5451	15.757	M1BWD2	Coatomer subunit epsilon
20.8098	20.8821	20.7588	20.7186	20.7638	20.7242	20.7279	20.6509	20.6723	20.8356	20.6518	20.562	20.7554	20.7344	20.6974	20.7953	M1BWE4	PSI-F
15.9583	15.9092	15.9782	15.9747	15.7799	15.9671	15.7949	15.7973	15.7745	15.822	15.7992	15.8712	15.5801	15.5368	15.5733	15.5096	M1BWE6	CbbY protein
14.2825	14.3311	14.4152	14.3792	14.1461	14.451	14.3545	14.2008	14.1347	14.509	14.4776	14.4796	14.0282	14.2548	14.4568	14.5124	M1BWH6	Proteasome subunit alpha type
17.2681	17.2414	17.2038	17.2123	17.072	17.0314	17.0713	17.0774	16.9692	17.0228	16.9959	17.0121	16.8506	16.8251	16.8339	16.8466	M1BWI7	40S ribosomal protein S4
16.7381	16.6134	16.7836	16.6947	16.6129	16.6273	16.5992	16.6485	16.5379	16.5581	16.5658	16.7475	16.3295	16.4396	16.4489	16.2613	M1BWL4	40S ribosomal protein S25
14.7438	14.7803	14.8513	15.0126	15.0902	15.107	15.2703	15.2217	15.65	15.5779	15.6876	15.7905	15.7639	15.8579	15.7236	15.7373	M1BWP3	Argonaute protein group
16.9884	17.0425	16.8344	16.9399	16.6462	16.7197	16.7122	16.7125	16.4989	16.4748	16.5116	16.4593	16.2604	16.2522	16.2437	16.2715	M1BWR0	Glu-tRNA(Gln) amidotransferase subunit A
17.0688	17.0249	17.0061	17.0474	16.7315	16.7073	16.6747	16.7625	16.5259	16.4143	16.5851	16.5121	16.2254	16.3405	16.271	16.2469	M1BWR1	Glutamyl-tRNA(Gln) amidotransferase subunit A
17.2422	17.0269	16.9606	16.9998	16.0753	15.9087	16.0323	15.9632	16.6311	16.5908	16.5587	16.7406	15.873	15.703	15.8927	15.902	M1BWS8	(S)-2-hydroxy-acid oxidase
16.4969	16.5016	16.4055	16.0331	16.4039	16.4126	16.4292	16.5462	16.3748	15.9171	16.2443	16.2908	15.8415	15.9929	15.9237	15.2108	M1BWT8	Rhamnose synthase
16.3534	16.3186	16.3644	16.3618	16.0749	16.0168	16.1188	16.0407	16.1091	16.2331	16.141	16.1152	16.0685	16.1128	16.009	15.9102	M1BWV6	Uroporphyrinogen decarboxylase
15.4649	15.3336	15.3896	15.3768	15.423	15.3187	15.445	15.4881	15.3741	15.4819	15.3858	15.4539	15.3346	15.3578	15.2524	15.3236	M1BWW8	DAG protein
15.0288	14.893	14.9855	14.9168	15.1517	15.1108	14.9414	15.1975	15.3185	15.0997	15.2737	15.272	15.4692	15.478	15.483	15.3556	M1BWY1	Ribose-phosphate pyrophosphokinase 4
19.7241	19.7324	19.7103	19.6799	19.747	19.6812	19.7516	19.6544	19.574	19.732	19.5479	19.5849	19.6536	19.7528	19.7238	19.7058	M1BWY5	Chlorophyll a-b binding protein, chloroplastic
16.4948	16.5618	16.5778	16.6362	16.5426	16.7306	16.6994	16.6154	16.5945	16.6756	16.6564	16.6213	16.6807	16.6933	16.6138	16.7374	M1BWY6	Uncharacterized protein
15.5448	15.4811	15.5177	15.5406	15.4996	15.3536	15.3741	15.3953	15.6569	15.7352	15.7027	15.7052	15.6492	15.6565	15.7744	15.7663	M1BX22	Uncharacterized protein
17.8132	18.1077	18.2273	18.0822	18.0396	17.6572	17.9587	17.5078	17.727	17.8069	17.7196	17.8228	17.7406	17.6649	17.6519	17.6466	M1BX50	ML domain protein
14.9236	14.7621	15.0592	14.7683	14.6075	14.7927	14.6514	14.6334	14.6308	14.6678	14.7749	14.7533	14.6403	14.7799	14.6509	14.6678	M1BX66	White-brown-complex ABC transporter family
14.5081	14.3607	14.3971	14.43	14.0527	13.7556	14.0105	14.2093	14.5002	14.5182	14.6011	14.6792	14.164	14.286	14.2248	14.1679	M1BXA1	[Acyl-carrier-protein] S-malonyltransferase
17.7198	17.7242	17.635	17.694	17.1766	17.3079	17.2834	17.2694	17.1802	17.3169	17.287	17.2301	16.8912	16.7916	16.8087	16.767	M1BXA4	33 kDa ribonucleoprotein, chloroplastic
16.5482	16.5613	16.4892	16.4675	16.5657	16.4297	16.4812	16.4344	16.0489	16.099	16.1337	16.1046	16.2122	16.165	16.1279	16.1558	M1BXB2	Fasciclin-like arabinogalactan protein 14
16.876	16.7246	16.6205	16.6274	15.8316	15.9942	15.1448	15.5108	15.7161	15.506	15.5073	15.4073	15.0289	14.781	14.7961	14.9839	M1BXE6	Xyloglucan endotransglucosylase-hydrolase XTH7
17.406	17.3094	17.3573	17.2669	17.2084	17.188	17.2008	17.2527	17.1392	17.1706	17.1091	17.1538	16.9019	16.9494	16.9669	16.891	M1BXI3	L24 ribosomal protein
16.008	15.9678	15.9507	15.9924	15.9034	15.8435	15.9141	15.8516	15.735	15.6383	15.618	15.6805	15.6154	15.5722	15.4849	15.6252	M1BXJ2	Branched-chain-amino-acid aminotransferase
16.1462	16.1577	16.1205	16.0287	16.1103	16.0409	16.0652	16.0901	16.0731	15.9669	16.0045	16.076	16.1478	16.1447	16.1816	16.18	M1BXM4	ADP-ribosylation factor
15.294	15.1393	15.2225	15.0911	15.0981	15.1781	15.2073	15.2269	15.1442	15.2999	15.302	15.2627	14.5001	14.8593	14.7509	14.5148	M1BXV3	SBT1 protein
16.3322	16.3095	16.3496	16.3122	16.4176	16.3681	16.3954	16.3403	16.061	16.0529	16.0376	16.0632	16.0612	16.1102	16.0897	16.0044	M1BXX6	Adenine phosphoribosyltransferase
13.5039	12.239	12.6107	13.1309	14.8655	14.4928	14.3438	14.6932	11.7467	12.4924	11.7838	12.738	12.6063	12.5721	11.8649	12.2585	M1BXZ7	CYP81B36
17.1855	17.1741	17.143	17.2075	16.9886	16.9081	16.9503	16.9542	16.6511	16.693	16.7311	16.6134	16.4406	16.2888	16.4026	16.5225	M1BY04	Adenosine kinase
14.8569	14.7726	14.8734	14.7821	14.9596	14.8982	14.7778	14.9337	14.8091	14.5408	14.784	14.8691	14.7702	14.8779	14.9396	14.8827	M1BY78	Ted2
14.9889	14.9732	14.8313	14.8882	15.2591	15.045	15.0702	14.9595	14.9792	14.9006	14.9568	14.9853	15.0009	14.96	14.8223	14.9574	M1BYD6	Eukaryotic translation initiation factor 3 subunit H
15.9652	16.0826	15.9398	15.8631	15.9045	15.9269	15.9043	15.8304	16.6541	16.7315	16.6965	16.6634	16.6164	16.6366	16.629	16.6568	M1BYE2	Phosphomannomutase
16.4073	16.2547	16.2552	16.2795	16.1844	16.223	15.9868	16.0917	16.0965	16.0358	16.0637	16.1084	16.1282	16.1113	16.1013	16.0616	M1BYF7	Small nuclear ribonucleoprotein-associated protein
14.3354	14.3962	14.1399	14.2765	14.5326	14.3484	14.2916	14.2874	14.4761	14.2094	14.2024	14.3227	14.7577	14.486	14.6314	14.7717	M1BYI5	Peroxisomal membrane protein
15.5666	15.6176	15.5441	15.4733	15.0118	15.3271	15.19	15.3269	15.31	15.4383	15.3779	15.3784	15.2076	15.1371	15.391	15.2745	M1BYQ1	DAG protein, chloroplastic
15.601	15.382	15.6263	15.5177	15.8812	15.7219	15.7437	15.8885	15.364	15.2939	15.3222	15.3504	15.4974	15.6839	15.6979	15.6649	M1BYR1	Thioredoxin h
19.9729	20.0512	20.0057	19.9348	19.9407	20.0409	20.0185	19.9686	19.8181	20.1014	19.8034	19.7881	19.8577	19.9218	19.8895	19.8831	M1BYS2	Photosystem II oxygen-evolving complex protein 3
16.171	16.1834	16.2831	16.1941	16.4347	16.4548	16.3563	16.35	16.3429	16.3256	16.2854	16.3576	16.457	16.5083	16.5218	16.44	M1BYS9	Glycosyltransferase
14.9601	14.9872	15.1146	14.8636	14.9391	15.0676	14.7861	15.1156	15.2948	15.0543	15.2688	15.3509	15.226	14.9676	15.2634	14.958	M1BYV2	Uncharacterized protein
14.4595	14.5031	14.2939	14.0683	13.7236	13.9791	13.6126	13.4452	13.8524	14.1068	13.7765	13.5989	13.3878	12.6146	13.2098	13.3479	M1BYY9	DUF4057 domain-containing protein
17.267	17.0685	17.161	17.0889	16.958	16.8338	16.863	16.8814	17.281	17.2519	17.2746	17.495	17.453	17.4509	17.3305	17.4331	M1BZ05	Histone H2A
18.4309	18.3732	18.5608	18.4007	18.1211	18.1781	18.2099	18.3431	18.3829	18.3546	18.3779	18.4269	17.9967	18.2454	18.0258	17.5286	M1BZ12	60S ribosomal protein L8
15.8039	15.9952	15.988	15.9604	16.1265	16.1404	16.0799	15.9862	15.243	15.2545	15.1728	14.6898	15.5545	15.4439	15.4112	15.4723	M1BZ24	Carbohydrate transporter
15.39	15.2298	15.388	15.4828	15.0887	14.8664	15.0457	15.1522	15.259	15.2458	15.2741	15.4025	15.2323	15.1301	15.2566	15.1934	M1BZ42	Inositol-3-phosphate synthase
17.887	17.8535	17.8932	17.8826	18.0861	18.1072	18.0136	18.2124	17.6013	17.6097	17.5709	17.7242	17.5759	17.5918	17.6762	17.6735	M1BZ56	Universal stress protein
15.7696	15.7167	15.8737	15.7877	15.818	15.779	15.8721	15.9068	15.7903	15.7647	15.7556	15.913	15.8437	15.9579	15.8902	15.871	M1BZ69	Prohibitin
15.2078	15.1164	15.034	15.1147	14.8252	14.9226	14.7596	14.8114	15.2338	15.2677	15.1328	15.2823	15.0287	15.1786	15.1054	15.1208	M1BZA1	Chloroplast inner membrane import protein Tic22
15.1681	15.1718	14.9914	15.1517	15.3097	15.0077	15.1989	15.1913	15.4985	15.6219	15.4244	15.412	15.6166	15.8084	15.7766	15.6936	M1BZB5	Probable 6-phosphogluconolactonase
16.614	16.5881	16.522	16.466	16.3025	16.4072	16.4236	16.2757	16.5066	16.5072	16.6333	16.5056	16.4846	16.4609	16.4607	16.3485	M1BZD5	Chitinase
12.9317	12.5984	12.6645	12.7752	12.6574	12.625	12.5392	12.5934	13.0879	12.8213	13.0322	12.7914	12.7827	12.7023	12.7672	12.8028	M1BZE8	Ribose-phosphate diphosphokinase
15.1199	15.1493	15.1693	15.1865	15.3022	15.2702	15.4077	15.1992	15.4044	15.5108	15.4583	15.3973	15.6231	15.5672	15.6903	15.7004	M1BZG1	Villin headpiece;Gelsolin region
15.6369	15.6196	15.6594	15.6107	15.2626	15.2803	15.3661	15.4753	15.334	15.4126	15.3656	15.5404	15.4261	15.3814	15.5198	15.6207	M1BZG4	Uncharacterized protein
20.4822	20.4864	20.5659	20.3662	20.4864	20.3037	20.4655	20.3229	20.2242	20.362	20.1902	20.2307	20.3295	20.3696	20.3571	20.21	M1BZP9	Photosystem I reaction center subunit IV B isoform 2
15.5051	15.5421	15.4569	15.4693	15.6151	15.5119	15.3797	15.464	16.1392	15.9636	16.0496	15.9931	16.2598	16.1819	16.276	16.2436	M1BZQ2	Uncharacterized protein
18.7706	18.8392	18.8431	18.766	18.7088	18.6707	18.6297	18.729	18.6454	18.5943	18.6083	18.5597	18.5951	18.5905	18.6721	18.611	M1BZS1	Peptidylprolyl isomerase
19.7642	19.7774	19.8154	19.8015	19.636	19.7332	19.7628	19.7346	19.8056	19.8893	19.8565	19.8881	19.7626	19.8141	19.7621	19.7216	M1BZW7	Transketolase
15.4632	15.561	15.3409	15.3613	16.0249	16.523	16.2469	16.1935	14.9882	14.9311	15.0429	15.2281	15.8927	15.7313	15.7654	15.9051	M1BZY6	Str_synth domain-containing protein
15.8763	16.0572	15.952	15.9469	15.6108	15.7871	15.8945	15.8754	15.0854	15.5201	15.3713	15.6021	15.0915	15.308	15.2945	15.464	M1BZY8	DNA binding protein
16.393	16.4393	16.4101	16.357	16.6625	16.5759	16.5639	16.6616	16.5184	16.5405	16.5478	16.5542	16.724	16.6734	16.7273	16.7503	M1BZZ0	ATP/GTP/Ca++ binding protein
15.0846	15.0051	15.1575	15.1352	15.3187	15.332	15.2171	15.2614	15.4535	15.3466	15.505	15.5425	15.6073	15.5691	15.5274	15.6121	M1C002	2,4-dienoyl-CoA reductase
19.1367	19.1838	19.163	19.1808	19.0655	19.1432	19.1797	19.1537	19.0842	19.1322	19.0949	19.0939	19.0366	19.07	19.0384	19.0383	M1C004	Phosphoglycerate kinase
16.5662	16.5567	16.5337	16.5595	16.6862	16.619	16.6661	16.7181	16.5887	16.638	16.5873	16.5792	16.6656	16.6879	16.6839	16.6609	M1C005	Phosphoglycerate kinase
17.7095	17.6512	17.5235	17.5855	16.873	16.9325	16.8716	16.8591	17.1068	17.0828	17.1066	17.0958	16.5823	16.4878	16.5385	16.5233	M1C015	Hydroxymethylbilane synthase
16.7097	16.6602	16.5963	16.7751	16.7316	16.7442	16.5301	16.5955	16.1836	16.1519	16.4068	16.215	16.338	16.0465	16.2236	15.8993	M1C030	Replicase
12.3158	12.2017	11.714	12.673	12.6758	12.4034	12.3564	12.3602	12.6117	12.3097	12.2998	12.2827	12.5513	12.7902	11.8121	12.2362	M1C061	Binding protein
17.1713	17.1305	17.1673	17.1646	17.3916	17.3657	17.3859	17.3764	17.2528	17.2813	17.2672	17.2617	17.349	17.3207	17.3083	17.3148	M1C075	Heat shock cognate protein 80
16.5825	16.4705	16.6194	16.5406	16.7161	16.8183	16.7267	16.7229	16.6656	16.5603	16.5439	16.6017	16.6245	16.7936	16.6769	16.6756	M1C0F2	NADH-u_ox-rdase domain-containing protein
16.3785	16.2499	16.3133	16.3183	16.2907	16.2404	16.264	16.2279	16.2856	16.3276	16.3088	16.3513	16.2626	16.2753	16.1571	16.2544	M1C0G3	40S ribosomal protein S8
17.1092	17.1746	17.1602	17.1726	17.3006	17.4294	17.2544	17.1815	15.4135	15.7182	15.5328	15.7059	15.7199	15.5485	15.5114	15.6417	M1C0H5	Polygalacturonase inhibitor protein
13.4854	12.5446	12.8589	13.4331	12.4762	12.5231	13.0014	13.3837	13.1601	12.6465	13.1585	12.9209	13.0909	12.915	12.2524	12.9589	M1C0H9	Fimbrin
17.1087	17.0905	17.0472	17.1011	16.806	16.9249	16.8724	16.7642	16.4103	16.4019	16.4731	16.4823	16.1602	16.1629	16.13	16.14	M1C0I4	Plastid-dividing ring protein
15.6404	15.6881	15.7186	15.712	15.6122	15.8269	15.7497	15.7099	15.3972	15.6474	15.5116	15.5344	15.434	15.355	15.4935	15.6076	M1C0J5	Thioredoxin HCF164, chloroplastic
15.0225	15.031	14.9932	14.987	14.9728	14.9165	14.8545	14.8986	14.8027	14.8085	14.8017	14.8112	14.7744	14.6836	14.8089	14.7483	M1C0K5	Imidazole glycerol phosphate synthase hisHF
16.6029	16.6212	16.5771	16.6197	15.8461	15.9219	16.2495	16.1718	14.3079	15.1551	14.5345	14.7426	14.7996	15.328	15.2021	14.9027	M1C0M0	Inducible plastid-lipid associated protein
15.4236	15.5144	15.3836	15.4595	15.4718	15.5366	15.4511	15.3847	15.7122	15.7056	15.709	15.7044	15.8145	15.7448	15.7924	15.7215	M1C0M5	RNA Binding Protein 45
15.9138	15.8748	15.9188	15.9349	16.1357	16.0739	15.9838	16.133	16.2617	16.1381	16.13	16.1866	16.4081	16.3035	16.3573	16.393	M1C0N9	Sulfurtransferase
15.5226	15.5874	15.5524	15.5325	15.509	15.5144	15.5058	15.4693	15.2568	15.2356	15.2856	15.2738	15.03	15.1086	15.0584	15.0108	M1C0Q0	Obg-like ATPase 1
18.7305	18.8082	18.7324	18.7053	18.8805	18.8762	18.8874	18.8843	18.712	18.7849	18.7458	18.7434	18.8201	18.8915	18.8252	18.7699	M1C0Q2	ATP synthase subunit alpha, mitochondrial
22.3864	22.343	22.4106	22.3597	22.3447	22.4096	22.3403	22.4218	22.3919	22.4331	22.4097	22.5047	22.388	22.5947	22.515	22.4461	M1C0R6	PSI-G
19.2867	19.3235	19.2835	19.2699	19.1425	19.2031	19.1881	19.1227	19.143	19.1701	19.1458	19.1168	19.2267	19.1651	19.2274	19.1875	M1C0V6	Fructose-bisphosphate aldolase
12.8451	12.9136	12.6366	12.972	13.3758	13.3536	13.2267	13.184	13.5191	13.3539	13.329	13.4016	13.8155	13.6791	13.2655	12.9613	M1C0W4	ABC transporter domain-containing protein
14.4409	14.264	14.4384	14.4179	14.4763	14.3848	14.4387	14.545	14.9968	14.8241	14.909	15.0515	15.0422	15.1372	15.0509	15.0673	M1C0Y2	Transporter
16.6532	16.668	16.713	16.5451	17.0027	16.9503	16.8707	16.8756	15.97	16.0388	16.0248	16.0895	16.3201	16.2818	16.2094	16.2475	M1C102	Glycerophosphodiester phosphodiesterase
15.0808	15.0917	15.0857	15.0683	15.2532	15.1063	15.1736	15.2198	15.2301	15.3169	15.1681	15.2131	15.417	15.3477	15.2942	15.4073	M1C107	Syntaxin-51
16.8755	16.8587	16.7651	16.7869	16.377	16.4322	16.4053	16.4146	16.06	16.0956	16.1466	16.1506	15.801	15.8448	15.8052	15.8252	M1C114	Peptidylprolyl isomerase
15.9405	15.9953	15.9234	15.9058	16.3357	16.203	16.2027	16.2986	16.1404	15.9826	16.0306	15.999	16.2609	16.2826	16.2284	16.231	M1C132	Dihydrolipoyllysine-residue succinyltransferase
14.9411	14.9154	15.0115	14.9047	14.9336	14.9176	14.9941	14.8637	14.9505	15.0097	14.9788	14.963	14.8048	14.7349	14.8917	14.8804	M1C159	Calcium-dependent protein kinase CDPK1
18.5971	18.579	18.7474	18.6683	19.2088	19.231	19.2811	19.1197	17.6617	17.9558	17.6869	17.73	17.8419	17.92	17.9422	17.8207	M1C184	Peroxidase;Suberization-associated anionic peroxidase
14.5703	14.7486	14.6931	14.6173	14.8235	14.7537	14.6642	14.8486	14.6536	14.7526	14.5276	14.5185	14.752	14.6541	14.7735	14.8284	M1C1B5	Eukaryotic translation initiation factor 3 subunit J
14.9357	14.9527	14.7718	14.9307	15.2674	14.6768	15.0634	15.1255	15.4157	15.4484	15.4399	15.4422	15.4991	15.5744	15.4469	15.401	M1C1E7	Epoxide hydrolase
15.7464	15.7079	15.7688	15.7831	15.9152	15.4903	15.8676	15.7949	15.25	15.1129	15.1196	14.7684	14.8811	14.9641	14.9727	14.6523	M1C1F1	Clathrin light chain
16.3587	16.4871	16.572	16.5277	16.8894	16.771	16.8061	16.8429	16.6009	16.4737	16.5052	16.5947	16.5876	16.6044	16.6455	16.733	M1C1G0	Allantoinase
15.4345	15.4857	15.61	15.4893	15.7604	15.91	15.8029	15.9037	15.6526	15.6458	15.4775	15.6644	15.7651	15.6852	15.7258	15.7739	M1C1J2	Riboflavin kinase
16.0956	16.0531	16.1794	16.1451	16.4242	16.1978	16.3525	16.3853	16.1783	16.1377	16.0474	16.1451	16.2803	16.3603	16.2832	16.3746	M1C1K7	NADPH quinone oxidoreductase
14.4765	14.4588	14.5915	14.5669	14.2926	14.6986	14.2802	14.3248	14.3447	14.4318	14.2634	14.7237	14.063	13.9675	13.8563	13.9749	M1C1N0	Catechol oxidase
14.684	14.8461	14.7269	14.7554	15.2094	15.0859	15.2787	15.1479	15.1755	15.1752	15.0424	14.9878	15.2783	15.3113	15.4319	15.3601	M1C1S9	N-acetyltransferase
16.0165	16.054	15.9433	15.85	15.881	15.8396	15.8154	15.9225	16.2368	16.315	16.2868	16.2638	16.1143	16.1153	16.1389	16.2027	M1C1T4	Uncharacterized protein
15.8043	15.7897	15.7146	15.7717	15.36	15.5255	15.4525	15.4272	15.973	15.8796	16.032	16.0228	15.8145	15.8008	15.8214	15.8244	M1C1T5	Zeta-carotene desaturase
16.1119	16.1496	16.1364	16.1387	15.9273	15.9601	16.0059	15.9905	16.3424	16.5026	16.3572	16.4111	16.2001	16.1835	16.2693	16.2838	M1C1T9	Phototropin-2
15.3467	16.0676	15.6086	15.4367	15.7414	15.8904	15.7867	13.7957	15.8383	15.3286	15.5131	15.5182	15.894	15.9836	15.76	12.2785	M1C1W7	Esterase/lipase/thioesterase family protein
15.185	15.2727	15.3231	15.3392	15.7799	15.8098	15.7458	15.7319	15.7604	15.8202	15.7247	15.8176	15.8754	15.9827	15.8396	15.9063	M1C1X9	DNA-damage-repair/toleration protein DRT102
12.1269	11.5101	12.2812	12.3303	12.8291	12.6427	12.399	13.058	12.9971	12.8017	12.8789	13.0607	12.9329	13.1739	13.148	12.9687	M1C201	Vacuolar protein sorting-associated protein 35
16.6343	16.6427	16.6647	16.6657	16.8037	16.7967	16.7549	16.7628	16.3444	16.2931	16.2177	16.421	16.3313	16.2842	16.4387	16.2062	M1C263	Proteasome subunit beta
17.2964	17.4456	17.3846	17.3651	17.348	17.4444	17.4301	17.4353	17.2683	17.3638	17.2657	17.3256	17.4442	17.2705	17.4077	17.4686	M1C2B3	Uncharacterized protein
15.4194	15.1312	15.0815	15.2994	15.3929	15.0734	15.031	15.1413	15.2708	15.0776	15.1365	15.158	15.6433	15.5738	15.4479	15.5657	M1C2C3	ATP-dependent Clp protease proteolytic subunit
15.69	15.6172	15.6029	15.7155	15.7386	15.8621	15.9048	15.9409	15.8512	15.783	15.8272	15.843	15.6228	15.8238	15.6944	15.9532	M1C2E0	Glutathione s-transferase
13.758	13.9274	13.9564	13.8718	13.8589	13.7597	13.7968	14.0216	14.0477	13.5972	14.1209	14.0148	13.8982	14.0079	13.9362	13.7226	M1C2F9	Increased size exclusion limit 2
15.9388	15.8638	15.8476	15.7713	15.5635	15.6332	15.4415	15.6704	15.1248	15.0702	15.0936	15.0372	14.6262	14.69	14.6882	14.5195	M1C2L0	Pale-green and chlorophyll B reduced 2
15.4105	15.4647	15.4196	15.35	15.4704	15.6619	15.3927	15.4129	15.34	15.5789	15.4444	15.4972	15.6202	15.519	15.4983	15.5531	M1C2L9	RNA-binding protein AKIP1
16.5623	16.9393	16.6127	16.4181	16.3872	16.5585	16.767	16.4068	15.9655	16.3239	16.0227	16.035	15.9775	16.0854	16.0578	15.9544	M1C2N5	Forkhead-associated domain-containing protein
15.8202	15.7825	15.8184	15.7585	15.6783	15.7661	15.6892	15.6762	15.5195	15.6252	15.5705	15.5655	15.6157	15.6406	15.5904	15.5879	M1C2P2	4-(cytidine-5'-diphospho)-2-C-methyl-D-erythritol kinase
15.9475	15.8946	15.906	15.9431	15.7873	15.9134	15.8226	15.7936	16.1006	16.1618	16.1568	16.2804	16.1177	15.9839	15.9449	15.9529	M1C2Q1	AGO4-2
16.8761	16.9569	16.8955	16.8872	16.9673	16.9622	16.9414	16.9295	17.1257	17.0869	17.0512	17.0088	17.2139	17.1578	17.2035	17.2517	M1C2Q3	NAD dependent epimerase/dehydratase family protein
14.7884	14.7294	14.6608	14.1162	14.9111	14.8711	14.795	15.1212	15.0411	15.0246	14.8424	14.8141	14.994	14.5969	14.9523	14.7283	M1C2Q7	Non-specific serine/threonine protein kinase
14.6784	14.6833	14.7306	14.5681	15.1722	15.1425	15.2351	14.912	14.3004	14.4502	14.16	14.3633	14.6181	14.1404	14.4077	14.3831	M1C2R5	Minor histocompatibility antigen H13
15.8538	15.7576	15.6046	15.7007	15.6179	15.4178	14.8409	15.1924	14.9656	14.7912	14.9474	14.9343	14.6082	14.9878	14.7566	14.9797	M1C2S4	Subtilisin-like protease
16.506	16.5873	16.549	16.3911	16.3136	16.2606	16.3462	16.2315	16.3587	16.3707	16.2771	16.2595	16.2514	16.1512	16.4303	16.2541	M1C2T1	PGR5 1A, chloroplastic
17.1767	17.1315	17.2755	16.7563	17.4579	17.6016	16.823	17.0904	16.7943	16.0445	16.7122	15.8896	16.5672	12.203	15.8479	16.0225	M1C2T9	UDP-L-rhamnose synthase
16.306	16.3341	16.3636	16.3235	16.5134	16.5559	16.551	16.5563	16.2378	16.1825	16.1605	16.1323	16.2052	16.2902	16.2697	16.1839	M1C2U6	Acetylornithine transaminase
15.2707	15.3059	15.2089	15.2334	15.5572	15.4863	15.2609	15.4742	15.1288	14.9738	15.1072	14.9578	14.9612	14.9912	15.0109	14.9906	M1C2V9	3-hydroxy-3-methylglutaryl coenzyme A synthase
14.5293	14.5853	14.4847	14.3719	14.5077	14.5499	14.3421	14.3223	14.1318	13.6976	14.1238	14.1405	14.1589	14.253	14.1383	14.1385	M1C2W2	SPX domain-containing membrane protein
14.131	14.0474	14.1337	14.1315	14.4514	14.2561	14.4522	14.499	14.9891	14.8385	14.9668	14.9951	15.1817	15.222	15.2369	15.2173	M1C2Y5	Protein kinase
15.4748	15.3031	15.3153	15.3856	15.2095	15.0945	15.1276	15.092	15.4227	15.1266	15.3199	15.2855	14.3341	14.6865	14.7067	14.3268	M1C313	Aspartate kinase
17.31	17.4448	17.3112	17.2903	17.2811	17.3512	17.2688	17.2918	17.4702	17.6353	17.5341	17.5982	17.6182	17.534	17.5574	17.5239	M1C340	Aspartate-semialdehyde dehydrogenase
19.3856	19.3625	19.3239	19.3212	19.3314	19.2176	19.204	19.233	19.5486	19.3811	19.4762	19.5104	19.729	19.7932	19.5994	19.615	M1C3A5	Triose phosphate/phosphate translocator, chloroplastic;Triose phosphate/phosphate translocator, chloroplastic
14.5634	14.2985	14.4056	14.4973	14.5652	14.3803	14.6109	14.6616	15.2959	15.2103	15.43	15.3697	15.4537	15.3733	15.3563	15.4345	M1C3A6	Interferon-induced guanylate-binding protein
16.4902	16.5087	16.5521	16.552	16.6376	16.5742	16.5565	16.6084	17.0134	16.9026	16.9368	16.9109	17.1123	17.1222	17.1889	17.0934	M1C3G7	Aldehyde dehydrogenase family 7 member A1
13.342	14.5114	14.2876	14.3045	15.6031	15.3935	15.4557	15.4211	11.9443	12.0728	12.2159	12.2518	13.045	11.7073	12.0983	12.1516	M1C3J2	Elicitor-inducible cytochrome P450
15.1723	14.9509	15.2781	15.27	14.6101	14.3006	14.5889	14.5929	14.4865	14.713	14.325	13.7953	14.3599	14.3213	14.598	14.201	M1C3Q2	Auxin-induced beta-glucosidase
15.0447	15.1487	15.2565	15.232	15.6964	15.7437	15.6556	15.6664	16.177	16.0741	16.1011	16.0019	16.5796	16.6484	16.6416	16.6825	M1C3R6	Uncharacterized aarF domain-containing protein kinase, chloroplastic
17.1037	17.0537	16.8785	17.0901	17.3425	16.8807	17.0119	16.3932	16.7198	16.6757	16.6457	16.7199	16.6623	16.6556	16.5652	16.67	M1C3U7	GTP-binding protein era
14.3187	14.3035	14.5136	13.9953	14.4304	14.2194	13.9674	14.4257	14.5824	14.4873	14.5278	14.6854	14.172	14.5084	14.3839	14.4788	M1C3X2	ATP-dependent transporter
15.3537	15.3322	15.3337	15.3559	15.2001	15.1866	15.2823	15.2409	15.3938	15.3801	15.4393	15.3638	15.2604	15.2092	15.1242	15.1071	M1C3X8	Tyrosine--tRNA ligase
16.3401	16.19	16.2259	16.3348	15.9809	15.846	15.9254	15.9908	16.1419	16.0512	16.0722	16.1055	15.8732	15.9001	15.9148	15.9	M1C3Z0	Uncharacterized protein
14.7357	14.7217	14.7947	14.7624	14.616	14.5208	14.7275	14.6595	14.6855	14.6019	14.7432	14.7743	14.5562	14.6151	14.5942	14.6868	M1C415	UDP-n-acteylglucosamine pyrophosphorylase
16.738	16.8019	16.76	16.7085	16.6999	16.703	16.6459	16.7113	16.382	16.3446	16.3764	16.407	16.4964	16.4801	16.4642	16.4571	M1C421	AIR synthase
17.9113	17.8562	17.8633	17.8711	17.7567	17.7	17.7141	17.7091	17.815	17.7689	17.7847	17.8067	17.6656	17.6522	17.6155	17.6169	M1C451	40S ribosomal protein S9
17.5251	17.5252	17.3816	17.4528	17.6533	17.6107	17.6594	17.6082	17.0158	16.97	17.0147	16.9666	16.9871	16.8933	16.9208	16.9615	M1C485	Superoxide dismutase [Cu-Zn]
17.9086	17.9097	17.9009	17.9363	18.0686	18.0749	18.0238	18.0354	17.9006	17.9072	17.8982	17.9462	18.0762	17.9131	18.0476	18.1072	M1C4B0	NADH-ubiquinone oxidoreductase 12 kDa subunit, mitochondrial
17.3699	17.3746	17.2494	17.3967	17.7756	17.8421	17.7467	17.6719	16.2387	16.447	16.5031	16.5464	16.4493	16.4034	16.3036	16.3987	M1C4F2	41 kD chloroplast nucleoid DNA binding protein (CND41)
16.1678	16.2685	16.159	16.1481	16.4958	16.4185	16.4693	16.4445	16.0737	16.3193	16.2073	16.2575	16.2902	16.2478	16.2512	16.372	M1C4H3	Eukaryotic translation initiation factor 6
18.0473	18.0163	18.061	18.0446	17.9081	17.8785	17.8978	17.8749	17.6509	17.6461	17.654	17.6557	17.4943	17.5013	17.5463	17.5003	M1C4H8	Cysteine synthase
15.2055	15.3531	15.4404	15.2412	15.1126	15.4125	15.0071	14.9552	15.4774	15.4332	15.4604	15.8131	15.4328	15.3996	15.1198	15.5345	M1C4K0	Short chain alcohol dehydrogenase
13.3777	13.3526	13.5198	12.7569	13.5508	13.4927	13.553	13.6622	13.4391	13.1329	13.6719	13.4141	13.9123	13.3489	13.8045	13.7612	M1C4L6	Cold shock domain protein 2
15.5797	15.3991	15.4564	15.5461	15.1824	15.0476	15.2508	15.2032	13.5871	13.673	13.6841	13.9562	13.6565	13.8383	13.691	13.5785	M1C4P4	Sn-2 protein
17.5128	17.5556	17.5021	17.544	17.8196	17.8298	17.8498	17.8274	17.4605	17.5106	17.4734	17.4238	17.6066	17.6431	17.5643	17.6198	M1C4Q8	ATP synthase subunit d, mitochondrial
15.6767	15.5274	15.5772	15.5282	15.3006	15.2069	15.2181	15.3699	14.938	15.0343	14.9551	14.9946	14.7977	14.6419	14.993	14.7399	M1C4U3	Plastid Tic40
16.2038	16.3029	16.4615	16.4678	16.871	16.6769	16.784	16.7221	16.9833	16.5286	16.8407	16.9695	17.1159	17.0436	17.1097	17.0466	M1C4X8	Alcohol dehydrogenase
15.5674	15.5193	15.6406	15.5579	15.4964	15.3808	15.636	15.5594	15.4844	15.5763	15.4775	15.5294	15.5449	15.5898	15.5172	15.5931	M1C4X9	3'(2'),5'-bisphosphate nucleotidase
18.5551	18.5973	18.5567	18.6198	18.5892	18.5448	18.5714	18.647	18.5626	18.6048	18.5547	18.482	18.3373	18.4098	18.3923	18.4324	M1C4Z5	Thioredoxin F1, chloroplastic
16.8392	16.8468	16.839	16.9067	16.8747	16.8856	16.8569	16.9311	17.2222	17.2013	17.2334	17.1916	17.1225	17.211	17.1174	17.1417	M1C4Z7	Phenylalanyl-tRNA synthetase
15.6757	15.6399	15.5523	15.5038	15.9153	15.627	15.6583	15.5686	15.4883	15.4702	15.4855	15.4824	15.3013	15.1643	15.3944	15.2996	M1C4Z8	Calreticulin
16.5321	16.5023	16.3601	16.4295	16.5334	16.3626	16.1951	16.3616	16.2557	15.9921	16.1304	16.0282	16.2038	16.1828	16.0959	16.0377	M1C504	Proteasome subunit beta
15.2538	15.3177	15.1502	15.3029	15.2344	15.2141	15.2129	15.187	15.1087	15.2986	15.1472	15.2201	15.1744	15.1678	15.2209	15.0645	M1C508	1-(5-phosphoribosyl)-5-[(5-phosphoribosylamino)methylideneamino] imidazole-4-carboxamide isomerase, chloroplastic
15.892	15.8686	15.7953	15.857	16.158	16.1437	16.0388	16.0566	15.5178	15.497	15.5551	15.4604	15.3741	15.3557	15.4097	15.4163	M1C511	Dolichyl-diphosphooligosaccharide--protein glycosyltransferase subunit 1
15.3495	15.1407	14.8338	15.4232	15.4243	15.2751	15.3623	15.2268	15.2214	15.5361	15.346	15.2735	15.4594	15.1991	14.5403	14.9433	M1C547	Isopentenyl-diphosphate Delta-isomerase
15.7287	15.5334	15.3212	15.6742	15.2992	15.4785	15.339	15.4356	15.3951	15.6933	15.531	15.7833	15.306	15.5559	15.3144	15.6326	M1C566	Uncharacterized protein
15.9365	15.8525	15.794	15.7857	15.5627	15.758	15.709	15.81	15.8553	15.7346	15.8532	15.7872	15.8687	15.8489	15.9812	15.9499	M1C577	Galactose-binding like domain containing protein
16.6281	16.6132	16.5226	16.4719	16.6223	16.4264	16.1172	16.4059	16.2833	15.9241	16.2591	16.2016	16.3506	16.3274	16.2365	16.2802	M1C5A0	Small nuclear ribonucleoprotein G
17.3591	17.3279	17.3184	17.2774	17.2079	17.1539	17.1404	17.1804	17.1218	17.0891	17.0582	17.0934	17.009	16.9294	16.9653	17.0183	M1C5A4	40S ribosomal protein S17
17.4119	17.5514	17.459	17.397	17.6763	17.8525	17.6272	17.5958	15.8998	16.0881	15.9196	15.6826	16.2782	15.9912	16.1695	16.169	M1C5A7	Uncharacterized protein
15	15.0473	14.9763	14.9118	14.963	15.0042	14.8166	15.0394	15.1081	15.0252	15.0925	15.2223	15.1351	14.9167	15.2035	15.1608	M1C5B7	Serine/threonine-protein phosphatase
16.7449	16.7409	16.6901	16.6998	16.9069	16.9931	16.713	16.8698	16.7761	16.5887	16.7591	16.6013	16.7825	16.8326	16.8997	16.8983	M1C5D1	Nitrilase and fragile histidine triad fusion protein
18.0065	17.907	17.8786	17.9532	17.6646	17.7111	17.7561	17.7658	17.0879	17.2883	17.1768	17.3589	16.8959	16.9974	17.0378	17.0335	M1C5D7	Dehydroascorbate reductase
15.4186	15.4011	15.2939	15.457	15.2381	15.2052	15.271	15.3152	15.3696	15.2671	15.3538	15.3116	15.2554	15.1489	15.1354	15.2007	M1C5E3	Methionyl-tRNA synthetase
16.6966	16.6133	16.6258	16.679	16.6309	16.5218	16.5285	16.6283	16.4316	16.3936	16.4487	16.4703	16.3014	16.363	16.3063	16.2858	M1C5E6	60S acidic ribosomal protein P0
14.904	15.0388	14.9441	14.7599	14.6969	14.885	14.5646	14.864	14.8559	14.6637	14.9072	14.7132	14.6481	14.6449	14.7408	14.7912	M1C5F4	TSC13 protein
15.8451	15.9411	15.9164	15.8823	16.1193	16.1259	16.0013	16.1557	16.0444	15.8565	16.0658	15.961	15.9904	15.8596	16.0528	16.0803	M1C5G9	IBR3 (IBA-RESPONSE 3)
16.3452	16.2581	16.3766	16.428	16.4767	16.4025	16.5435	16.4994	16.5663	16.5683	16.5938	16.6575	16.6461	16.7297	16.5896	16.5808	M1C5H3	Epoxide hydrolase
15.6474	15.6269	15.5874	15.6552	15.8037	15.8346	15.8046	15.8037	15.7973	15.8561	15.7736	15.8059	15.8159	15.7801	15.7361	15.8307	M1C5J7	T-complex protein 1 subunit gamma
16.0694	16.1449	15.9779	15.9624	15.7587	15.681	15.6761	15.567	15.6334	15.6858	15.4979	15.5491	15.5899	15.225	15.5306	15.3147	M1C5J8	Biotin carboxyl carrier protein of acetyl-CoA carboxylase
15.6765	15.7424	15.7426	15.7327	15.9294	15.9459	15.9134	15.9039	15.9127	15.9436	15.905	15.8985	16.0516	16.0513	16.0994	16.1065	M1C5K3	Isocitrate lyase and phosphorylmutase
19.1953	19.2884	19.1819	19.0186	18.8763	19.0478	18.9404	19.0374	18.8661	19.1051	18.8973	19.0509	18.7461	18.923	19.074	19.0128	M1C5L1	Chlorophyll a-b binding protein, chloroplastic
16.6365	16.5275	16.6708	16.6115	16.2511	16.0966	16.2489	16.2376	16.4765	16.5115	16.4972	16.6032	16.2668	16.3383	16.3202	16.3825	M1C5M7	Protein RESISTANCE TO PHYTOPHTHORA 1, chloroplastic
13.5991	13.3669	13.5027	13.7525	13.4433	13.3016	13.284	13.566	14.6331	14.309	14.6632	14.5919	14.6102	14.6151	14.4862	14.5146	M1C5N5	HAD-superfamily hydrolase, subfamily IA, variant 3;HAD-superfamily hydrolase, subfamily IA, variant 3
14.7799	14.7097	14.7682	14.7921	14.8973	14.8265	14.8972	14.8407	14.8909	14.82	14.8841	14.8626	14.7428	14.7213	14.7207	14.7098	M1C5P2	Translation initiation factor
16.641	16.8239	16.6829	16.7082	16.8436	16.8977	16.945	16.7154	17.3109	17.5448	17.3504	17.2135	17.424	17.3087	17.3982	17.5112	M1C5S8	Copper chaperone
15.1743	15.1088	15.2032	15.1915	15.5437	15.3649	15.5021	15.5235	15.4629	15.3411	15.4105	15.4744	15.5971	15.6289	15.5764	15.6307	M1C5X7	2-oxoglutarate dehydrogenase
15.5987	15.5359	15.4812	15.5714	15.6267	15.4385	15.5283	15.5321	15.4036	15.2261	15.3388	15.4309	15.2674	15.3037	15.3109	15.3645	M1C674	NtRab11D
17.134	17.1577	17.0794	17.1443	16.8797	16.868	16.9169	16.8988	17.2569	17.2817	17.2933	17.2327	17.1655	17.1798	17.1731	17.1605	M1C689	Uncharacterized protein
14.3341	14.3733	14.4669	14.1843	14.5008	14.3451	14.5339	14.2929	14.0077	14.303	14.0305	13.7965	13.7063	13.9079	14.0499	13.8745	M1C697	Inositol-1-monophosphatase
17.2948	17.2217	17.1785	17.1937	17.2443	17.2136	17.1192	17.1647	17.1353	17.0884	17.1516	17.1651	17.0274	16.9889	16.9303	16.9508	M1C6A5	60S ribosomal protein L6
14.4914	14.4535	14.4969	14.5958	14.9462	14.8781	14.8785	14.8724	15.4814	15.5233	15.4423	15.5456	15.8814	15.7619	15.928	15.8635	M1C6B8	Glutamine synthetase
16.5087	16.2822	15.4275	16.092	15.9853	15.9561	15.869	15.9096	16.0642	16.1731	15.9301	15.8946	15.9812	16.133	13.1229	15.8065	M1C6C2	ALY protein
16.5494	16.6107	16.5562	16.5664	16.6877	16.7364	16.6602	16.655	16.4831	16.4911	16.5223	16.4958	16.4899	16.5525	16.5022	16.5149	M1C6I0	Asparagine--tRNA ligase
14.7174	14.6908	14.698	14.5448	14.9164	14.8776	15.0208	14.9728	14.8192	15.0099	14.9752	14.7597	14.8272	14.9384	14.9612	15.0155	M1C6J2	Ubiquitin-protein ligase
16.6372	16.7241	16.5911	16.6339	16.7351	16.6808	16.6882	16.6083	17.0554	17.0618	17.0489	16.9733	17.1052	17.1364	17.1402	17.1713	M1C6J4	Plastid-lipid-associated protein 13, chloroplastic
16.3235	16.4605	16.2768	16.1094	16.4755	16.4171	16.4402	16.4069	15.9933	15.5996	15.8641	15.8413	15.873	15.8392	15.4714	15.5918	M1C6L7	Adenylosuccinate synthetase, chloroplastic
15.3096	15.22	15.3521	15.1575	15.4995	15.4715	15.5082	15.3316	15.7185	15.74	15.7301	15.7705	15.8262	15.8124	15.8518	15.8584	M1C6M7	Villin-2
16.3476	16.4198	16.3222	16.3581	16.3473	16.3277	16.3949	16.3474	16.4237	16.4148	16.4949	16.3605	16.4906	16.5289	16.4134	16.4518	M1C6N0	Thioredoxin reductase
19.5229	19.6424	19.4859	19.4359	19.3731	19.3313	19.2658	19.2063	19.5823	19.6261	19.5518	19.4712	19.5665	19.4845	19.4991	19.5144	M1C6S0	Actin-58
16.6829	16.7842	16.5138	16.6274	16.5246	16.5356	16.319	16.4053	16.4037	16.4172	16.3712	16.4892	16.4146	16.3383	16.3797	16.1476	M1C6S3	C2
15.4927	15.6838	15.4638	15.4174	15.3669	15.564	15.525	15.3143	15.6564	15.6629	15.7207	15.5533	15.8301	15.7698	15.8083	15.7917	M1C6Y9	PAP fibrillin
16.0584	16.0387	16.0761	16.0246	15.8482	15.9142	15.9689	16.0794	15.7644	15.9418	15.7834	15.9023	15.8167	15.8802	16.0548	16.0808	M1C6Z9	Ankyrin-repeat protein HBP1
16.1341	16.0856	16.0458	16.0854	15.9131	15.9469	15.8073	15.9365	15.1975	15.2716	15.2508	15.327	14.7666	14.6948	14.724	14.6557	M1C704	Globulin
16.3784	16.3644	16.3655	16.4062	16.3497	16.4629	16.4757	16.4312	16.3326	16.357	16.3553	16.4095	16.1614	16.3557	16.2452	16.1813	M1C712	Fad oxidoreductase
16.0579	16.0825	16.1501	16.0501	16.1844	16.187	16.1174	16.261	16.7007	16.7517	16.7676	16.666	16.6392	16.6328	16.7746	16.6897	M1C720	Thiamine-phosphate pyrophosphorylase
14.5285	14.3294	14.3564	14.3722	14.0783	14.0704	14.0295	14.0741	14.069	13.9259	14.01	14.0121	13.6811	13.6372	13.6941	13.7278	M1C744	Uncharacterized protein
16.374	16.0917	16.4077	16.3954	16.54	16.379	16.5124	16.5126	16.0627	16.1296	15.9472	15.8814	16.0505	15.8829	15.8462	16.0388	M1C755	Embryo-specific 3
18.1949	18.1132	18.0981	18.1163	17.6817	17.6418	17.6972	17.7085	17.8954	17.8131	17.8848	17.8998	17.6445	17.5769	17.6077	17.5802	M1C7B2	EMB2394 (EMBRYO DEFECTIVE 2394)
15.4702	15.5224	15.5016	15.4246	15.3428	15.4437	15.1937	15.2331	15.3658	15.2722	15.253	15.2681	15.209	15.2061	15.2628	15.1565	M1C7B8	Uncharacterized protein
16.5314	16.4611	16.4828	16.387	16.3058	16.3316	16.3214	16.3677	16.3728	16.3088	16.395	16.3381	16.3299	16.3102	16.287	16.3768	M1C7H0	Chloroplast lumen common family protein
14.8361	14.7526	14.7557	14.7066	14.2551	14.2929	14.1323	14.1982	13.9946	14.0879	14.0211	14.0729	13.5477	13.3538	13.5556	13.6285	M1C7P0	Biotin carboxyl carrier protein of acetyl-CoA carboxylase
16.6413	16.6816	16.6501	16.7672	16.9127	16.8973	17.0618	17.0518	16.6526	16.6351	16.4927	16.405	16.5477	16.674	16.7345	16.7121	M1C7R4	Amino acid binding protein
13.1287	12.4504	11.9288	12.5073	12.9239	13.0773	12.645	12.3365	12.4134	12.3715	11.8677	11.7739	13.03	12.3652	12.6686	12.3316	M1C7V2	YTH domain-containing protein
18.1173	18.1057	18.0243	18.0902	17.9113	17.997	17.9477	17.9084	17.9572	18.0073	17.981	17.9979	17.9362	17.876	17.8811	17.9289	M1C7V7	Chaperonin-60 beta subunit
15.7555	15.7503	15.751	15.7199	15.6801	15.7545	15.632	15.7781	15.773	15.7295	15.8118	15.8075	15.5712	15.5749	15.6783	15.5951	M1C7W3	ATP citrate synthase
13.8279	13.7402	13.7073	13.8237	13.6529	13.783	13.529	13.8107	14.3348	14.0347	14.2872	14.1748	14.0251	14.1362	14.1254	14.1339	M1C7W5	Phytochrome;Phytochrome B
17.1167	17.1695	17.1463	17.1416	17.1638	17.2603	17.2046	17.1718	17.15	17.1828	17.1712	17.0931	17.1162	17.1036	17.1471	17.1599	M1C7Y3	Serine endopeptidase degp2
15.8278	15.7617	15.7442	15.8322	16.2959	16.0515	16.2286	16.1034	16.8193	16.775	16.7996	16.8359	17.1362	17.2397	17.1772	17.2508	M1C7Y9	Fiber protein Fb19
14.6284	14.4112	14.6286	14.6946	14.9854	14.8858	14.9204	14.9414	14.7563	14.6407	14.8173	14.8316	14.8909	15.077	14.8719	14.8809	M1C800	NPL4 family protein
13.4036	13.2507	13.3374	13.3459	13.8106	13.9049	13.8548	13.4742	13.6109	13.6178	13.7151	13.5536	13.942	13.688	13.5486	13.7179	M1C817	Cullin 1B
16.4819	16.4523	16.4755	16.578	17.1695	17.4354	17.1577	17.2188	15.9268	15.8768	16.0255	15.9925	16.7424	16.7468	16.6807	16.7126	M1C835	Peroxidase
15.5244	15.5745	14.7303	15.1035	14.2011	14.6532	13.9377	13.3116	14.5519	14.7055	13.4845	14.4432	14.0174	14.2274	14.4692	14.2319	M1C836	Uncharacterized protein
18.2828	18.1257	18.2387	18.2311	18.0682	18.0473	18.0677	18.2838	17.9354	17.8537	17.9121	17.9954	17.7723	17.8645	17.9594	17.9784	M1C888	Thioredoxin Y1, chloroplastic
14.5048	14.5346	14.3738	14.5168	14.3698	14.4722	14.3915	14.3468	14.3665	14.2577	14.3758	14.4388	14.2503	14.3598	14.3833	14.359	M1C8A0	PH domain-containing protein;Uncharacterized protein
17.2778	17.2849	17.3144	17.3056	17.1848	17.2515	17.3001	17.2572	17.3566	17.4821	17.4056	17.485	17.4546	17.4897	17.5276	17.5209	M1C8A8	D-fructose-1,6-bisphosphate 1-phosphohydrolase
17.5399	17.5603	17.5029	17.4672	17.173	17.3031	17.1773	17.1731	17.6143	17.5924	17.5844	17.6843	17.5267	17.4404	17.4737	17.4798	M1C8D8	Pectin acetylesterase
12.8509	12.8101	14.3479	12.5846	12.5857	12.6219	12.6373	12.6154	12.6032	12.447	12.5104	12.5992	12.4222	12.7494	12.4289	12.5806	M1C8F3	Uncharacterized protein
16.6035	16.6638	16.7888	16.6025	16.0659	16.0198	16.0086	15.9397	16.4606	16.4922	16.35	16.4119	15.7835	15.9655	15.7581	15.8368	M1C8F8	3-isopropylmalate dehydrogenase small subunit
16.9058	16.9555	16.951	16.8815	16.9668	16.991	16.949	16.8685	17.0487	17.0808	17.0748	16.9816	17.1452	17.1114	17.1899	17.2095	M1C8H2	Monoxygenase
23.0891	23.2842	23.1084	23.1434	22.8985	23.1167	23.0096	22.9452	22.9137	23.1559	23.0447	23.1059	22.8827	22.8628	23.0965	23.106	M1C8J9	Ribulose bisphosphate carboxylase small chain;Ribulose bisphosphate carboxylase small chain C, chloroplastic
16.4348	16.4163	16.5107	16.4093	16.7321	16.6294	16.7084	16.7549	16.5518	16.5083	16.5245	16.6498	16.7481	16.8557	16.7502	16.9189	M1C8L3	14-3-3 protein 4
15.2694	15.1638	15.3995	15.3325	15.4133	15.2271	15.3964	15.5072	15.0108	15.1452	15.0112	15.1043	14.9416	15.1549	14.8603	15.1143	M1C8L6	Ubiquitin receptor RAD23
15.2061	15.1708	15.2557	15.1213	15.0352	15.1062	14.9677	15.093	15.407	15.2513	15.409	15.3093	15.381	15.4238	15.4272	15.4237	M1C8N0	Nudix hydrolase 24
14.7536	14.8339	15.0379	14.7601	15.0542	14.8992	15.0718	15.2254	14.6325	14.7807	14.8618	14.8732	14.5497	14.799	14.517	13.9286	M1C8P1	Neighbor of COX4
15.7379	15.6244	15.7121	15.6983	15.8789	15.7686	15.8093	15.8245	15.8932	15.7649	15.8669	15.8726	15.8818	15.9113	15.8333	15.9277	M1C8Q0	26S proteasome subunit RPN7
15.3914	15.28	15.266	15.4699	15.4568	15.499	15.3648	15.406	15.1339	15.0548	15.1978	15.145	14.9776	15.2666	15.1189	15.304	M1C8Q1	Adenylate kinase;UMP-CMP kinase;Adenylate kinase
14.4562	14.2025	14.4048	14.3827	14.3751	14.3854	14.4599	14.5005	14.4613	14.2398	14.4316	14.4926	14.0654	14.3038	14.0919	13.9963	M1C8R8	Pyruvate kinase
16.0512	15.9277	15.9701	15.9538	15.9757	15.9833	15.9733	15.9463	16.0481	15.9014	16.0657	15.8177	15.8775	15.7973	15.9605	15.8381	M1C8T8	Spermidine synthase
16.8362	17.1779	17.0644	16.9995	17.0333	17.1377	17.0223	17.2481	17.0648	17.0659	17.1691	17.1023	17.1521	17.197	17.0626	17.1461	M1C8X3	Uncharacterized protein
15.7174	15.5795	15.4087	15.4348	15.3625	15.4983	15.3501	15.5405	14.7306	14.8753	14.7965	14.9717	14.6182	14.7097	14.8239	14.8251	M1C8X8	Ribonucloprotein
15.1152	15.2553	15.1953	15.0838	15.3912	15.4136	15.2421	15.2372	15.0506	15.2343	15.0496	15.0922	15.181	15.002	15.198	15.2023	M1C8X9	Proteasome inhibitor
18.7965	18.7352	18.3951	18.5916	18.1188	17.5031	17.6196	17.7076	13.3201	13.983	13.2722	15.8563	12.8872	13.0885	12.9232	13.934	M1C906	Gamma aminobutyrate transaminase isoform2
16.1252	16.1703	16.0425	16.1722	15.8876	16.091	15.8853	15.8738	16.1528	16.2946	16.2122	16.1565	16.1583	15.977	16.1657	16.1006	M1C940	GATA-N domain-containing protein
15.8669	15.8429	15.8545	15.8456	15.7938	15.8565	15.7956	15.8238	15.9249	15.9187	15.936	15.9088	15.9463	15.8995	15.9288	15.9013	M1C988	Cytochrome P450
14.2047	14.1692	13.9656	14.2542	14.3852	14.275	14.3393	14.0715	14.7184	14.4867	14.6376	14.6663	14.9175	14.8507	14.7049	14.6805	M1C989	Glycosyltransferase
16.8982	16.8735	16.8788	16.9416	16.7955	16.7219	16.8377	16.8448	16.6224	16.5575	16.5752	16.6054	16.7546	16.694	16.7652	16.9051	M1C990	Ripening regulated protein
16.6536	16.6274	16.6828	16.6099	16.3999	16.262	16.3313	16.3784	16.2161	16.2429	16.2831	16.3277	16.063	16.0567	16.0612	16.0799	M1C9E1	Chorismate synthase
15.6803	15.6909	15.705	15.6688	15.9638	15.947	15.8391	15.8963	15.7396	15.546	15.7396	15.7067	15.8048	15.7469	15.8189	15.805	M1C9K3	26S proteasome subunit
17.325	17.4683	17.3624	17.2671	17.6236	17.6445	17.5059	17.4739	16.9164	16.9919	16.8719	16.9161	17.1407	17.0628	17.0966	17.1282	M1C9M8	B12D protein
18.1272	18.1646	18.1846	18.1591	18.5253	18.5111	18.5132	18.4937	18.09	18.1243	18.082	18.0507	18.1642	18.2325	18.2046	18.1777	M1C9T0	Aldehyde dehydrogenase
15.6934	15.7056	15.5674	15.629	15.586	15.5518	15.5534	15.5497	15.4269	15.3708	15.3111	15.3325	15.0938	15.0584	15.0087	15.151	M1C9T8	Phosphoglycerate mutase
16.9005	16.8474	16.8374	16.862	16.5134	16.5884	16.5757	16.5926	16.9461	16.897	16.9893	17.0482	16.8344	16.8278	16.7822	16.8501	M1C9V9	1-deoxy-D-xylulose-5-phosphate reductoisomerase
18.589	18.594	18.5967	18.5786	18.5335	18.5567	18.5334	18.4736	18.7002	18.7005	18.7252	18.7203	18.7817	18.6984	18.7184	18.7567	M1C9W6	Extracellular Ca2+ sensing receptor
15.1737	15.0183	15.0999	15.1325	14.9669	14.5915	14.6026	14.97	14.7366	14.4587	14.6277	14.8421	14.2132	14.6283	14.2788	14.3327	M1C9W9	Cell growth defect factor
15.8897	14.6413	15.0432	15.8155	16.1725	16.6754	14.9676	15.1179	15.9088	14.6606	15.4199	14.9681	16.8645	16.1766	15.256	14.4505	M1C9Y0	Protease
18.7607	18.795	18.7556	18.757	18.7961	18.7461	18.729	18.7219	18.8543	18.9337	18.8534	18.7891	18.9688	18.9331	18.974	18.9538	M1CA02	23 kDa subunit of oxygen evolving system of photosystem II
14.6821	14.7197	14.7146	14.75	15.1901	15.2168	15.1958	15.1459	14.4002	14.4307	14.5064	14.5017	14.5189	14.5702	14.6763	14.551	M1CA07	Multidrug resistance protein
18.6728	18.8134	18.7211	18.663	18.649	18.6917	18.6131	18.6583	18.4101	18.4881	18.4164	18.3733	18.3072	18.19	18.2864	18.2921	M1CA24	40S ribosomal protein S19
13.9262	13.8555	13.8176	13.8664	14.1483	14.1189	14.1273	14.1077	14.4811	14.5443	14.4742	14.6486	14.4287	14.7706	14.5151	14.4784	M1CA33	Uncharacterized protein
15.3504	15.1451	15.2566	15.3031	15.0065	14.9084	15.0171	15.0193	15.136	14.9959	15.1362	15.1338	14.8753	14.8714	14.8739	14.9167	M1CA43	Carbamoyl phosphate synthase small subunit
13.9436	13.7913	13.9035	14.1214	13.9878	13.9866	14.0428	14.1488	14.5031	14.4102	14.5019	14.5765	14.5479	14.6504	14.604	14.5841	M1CA86	NAD(P)H-hydrate epimerase
15.9415	16.0662	15.8698	15.8679	15.807	15.944	16.0228	15.7869	15.9208	15.6395	15.7759	15.738	15.8871	15.6904	15.7724	15.577	M1CA88	Mannose-1-phosphate guanyltransferase
15.8029	15.7506	15.7175	15.77	15.9052	15.9385	15.861	15.9388	15.881	15.8357	15.8196	15.8888	15.8668	15.8802	15.7828	15.8361	M1CA90	Aminoaldehyde dehydrogenase 2
16.7808	16.7712	16.7406	16.6906	16.5413	16.6118	16.2987	16.6153	16.9903	16.9449	17.0347	17.0603	17.0433	17.0384	17.0622	17.0915	M1CA97	Permease I
15.2691	15.2586	15.2543	15.0873	15.0681	15.0646	15.2517	15.3223	15.2759	15.1401	15.0085	15.2473	15.0281	15.0864	15.3096	15.3289	M1CAD6	Cysteine dioxygenase
15.6524	15.5813	15.6014	15.6027	15.1312	15.3068	15.2697	15.3051	15.2531	15.4911	15.4853	15.7023	15.8681	15.6054	15.7064	15.744	M1CAD9	Str_synth domain-containing protein
15.1919	15.1321	15.1966	15.182	16.0547	15.8725	15.7966	15.893	14.8483	14.4706	14.6638	14.625	15.0355	15.1122	15.0625	14.9329	M1CAF1	Glycosyltransferase
15.3642	15.5811	15.2128	15.1808	15.5459	15.3877	15.1034	15.2934	14.9294	15.1289	14.8102	14.994	15.0856	15.0329	14.93	14.1332	M1CAH1	Pentatricopeptide repeat-containing protein
18.3335	18.4012	18.3283	18.3145	18.4326	18.5005	18.4353	18.3882	18.3233	18.396	18.3148	18.2706	18.4691	18.4257	18.4945	18.4223	M1CAH6	Uncharacterized protein
16.301	16.4193	16.321	16.2889	16.5449	16.5451	16.5552	16.5012	16.2497	16.2623	16.254	16.172	16.3706	16.3573	16.363	16.3735	M1CAI4	ATP synthase subunit gamma, mitochondrial
14.6353	15.0198	14.7366	14.9911	14.4624	14.6582	14.5005	14.3975	15.0089	14.8926	15.1878	15.0243	14.6898	14.9123	14.664	14.764	M1CAJ0	Flavonoid 3'-monooxygenase
17.2471	17.4261	17.3683	17.3023	17.5884	17.5504	17.5209	17.3318	16.6647	15.7498	15.881	15.3433	16.1785	15.7859	13.4943	15.567	M1CAK5	Catalytic/ oxidoreductase, acting on NADH or NADPH
13.3865	13.4477	13.4997	13.3664	13.8759	13.5089	13.5072	13.7651	13.7887	13.6516	13.6927	13.5956	13.8441	13.7546	14.0593	14.023	M1CAP0	Long-chain acyl-CoA synthetase
18.0161	17.7895	17.6911	17.6558	17.5865	17.52	17.6501	17.6758	15.9235	16.3253	15.9746	15.8778	15.7915	15.1945	14.9144	14.8848	M1CAP3	Lipoxygenase
15.9073	16.0244	15.9679	15.9593	16.1024	16.0401	16.1008	16.1478	16.0405	16.0691	16.0732	16.0801	15.9934	16.132	16.08	16.14	M1CAQ3	6-phosphogluconate dehydrogenase NAD-binding domain-containing protein
16.0391	16.0926	15.9997	16.0495	16.2972	16.2307	16.1619	16.2036	16.1032	16.1679	16.1563	16.1143	16.2351	16.1443	16.1846	16.1904	M1CAU1	26S protease regulatory subunit 6A homolog
18.7229	18.7622	18.6962	18.6719	18.6546	18.7118	18.6606	18.5498	18.416	18.5095	18.4409	18.4456	18.4848	18.2336	18.385	18.4338	M1CAU6	60S ribosomal protein L22
18.0858	17.8613	18.0599	17.9565	17.9277	17.8512	17.8886	17.951	17.8869	17.7409	17.8049	17.842	17.6176	17.7306	17.6572	17.4857	M1CAV1	60S ribosomal protein L18
15.7044	15.7177	15.7279	15.6866	15.8526	15.8477	15.8447	15.8352	16.0287	16.094	16.0831	16.1764	16.2736	16.1752	16.202	16.2321	M1CAV4	WD-repeat protein
16.2724	16.2012	16.2304	16.2191	16.3163	16.2774	16.2184	16.2661	16.1316	15.9353	16.0477	16.1211	16.3056	16.2184	16.2322	16.0894	M1CAX0	Inner membrane protein yrbE
13.0408	12.9987	12.8711	13.2344	13.1169	12.8004	12.7083	12.9516	12.3629	11.7974	11.9707	11.9603	11.7258	12.3818	12.2388	12.0116	M1CAY1	Beta-mannosidase
16.2152	16.2348	16.178	16.2217	16.1244	16.2581	16.1856	16.1995	16.4186	16.4038	16.4527	16.4124	16.4013	16.4427	16.4449	16.3951	M1CAY5	Xaa-pro aminopeptidase
15.8629	15.8947	15.9152	15.8456	15.521	15.6228	15.6185	15.5135	16.2588	16.0476	16.1076	16.3768	16.485	16.4708	16.2799	16.3195	M1CB05	Histone H2A
16.6557	16.6595	16.6907	16.5953	16.8888	16.9173	16.6718	16.848	16.9045	16.8616	16.8184	16.8624	16.9616	16.9176	17.036	17.0476	M1CB97	Carboxypeptidase
14.0303	14.3027	14.1757	14.3474	14.0954	13.7727	14.0415	14.2014	14.0029	13.9462	13.9039	14.0319	14.0007	13.9734	13.988	14.217	M1CBB6	Maltose transporter
16.3395	16.3935	16.3447	16.3714	16.4264	16.3887	16.3147	16.2837	16.1941	16.1733	16.1881	16.1173	16.0708	16.1859	16.0825	16.1389	M1CBC3	23 kDa subunit of oxygen evolving system of photosystem II
16.2691	16.0848	16.1984	16.0984	16.1534	15.9976	15.9226	16.0536	16.1336	15.7553	16.0489	15.9607	16.1132	15.9918	16.0701	16.0626	M1CBE1	Protein phosphatase 2c
17.2895	17.1288	17.2173	17.1614	17.0581	16.9627	16.9977	17.022	17.0506	17.0569	16.9977	17.0391	16.8717	16.8038	16.8841	16.9066	M1CBF6	40S ribosomal protein S2
14.1843	14.2694	14.0601	14.1536	14.674	14.6962	14.6846	14.8541	13.3024	13.4182	13.4015	13.4211	12.555	13.0633	13.2896	12.9516	M1CBG2	Uncharacterized protein
17.7205	17.9126	17.7475	17.7795	18.1178	18.3112	18.1734	18.0527	17.6953	17.819	17.7865	17.7297	17.9874	18.0586	17.9218	17.8241	M1CBK0	Cytochrome c
15.2749	15.3375	15.332	15.4463	15.0884	15.1626	15.1369	14.9994	15.6064	15.5045	15.6473	15.7137	15.6718	15.6478	15.5657	15.5807	M1CBL9	Glycinamide ribonucleotide synthetase
17.9028	17.9344	17.9436	17.9432	17.9121	17.9902	18.015	17.9165	18.0726	18.1567	18.1324	18.1254	18.1569	18.1795	18.1116	18.1433	M1CBM0	Chloroplast heat shock protein 70-2
14.196	14.2314	14.3637	14.4662	14.9161	14.9072	14.8569	15.054	14.4513	13.9242	14.4512	14.4177	14.8921	14.2441	14.4312	14.6965	M1CBM7	Yth domain-containing protein
15.9814	15.9932	15.9877	15.9767	15.9896	15.9091	15.9401	16.0148	15.8831	15.8648	15.8228	15.894	15.948	15.9509	15.9296	15.8421	M1CBR3	Uncharacterized protein
16.5539	16.4581	16.4525	16.474	16.6259	16.5053	16.4773	16.5589	16.3052	16.2948	16.3147	16.3148	16.1833	16.1683	16.1281	16.1917	M1CBR7	Coatomer subunit delta
14.9072	14.7808	14.8437	14.8334	15.1108	14.9731	15.0566	15.1606	14.6792	14.7779	14.7466	14.6918	14.6502	14.8007	14.6464	14.5893	M1CBS3	Ribosomal protein L3
15.4052	15.4828	15.3419	15.3208	15.5819	15.7026	15.539	15.5261	13.0619	14.2143	14.2421	14.3209	14.1415	14.1826	14.2119	14.0613	M1CBT5	Uncharacterized protein
14.9106	14.9394	14.8399	14.8056	15.0101	14.8843	14.9656	14.8824	15.0096	15.0071	14.8103	14.7962	14.6307	14.7114	14.6484	14.4863	M1CBT8	ATP phosphoribosyltransferase
14.7343	14.7038	14.5754	14.5917	14.7142	14.5202	14.4732	14.453	14.8363	14.4763	14.5293	14.8077	14.8877	14.7896	14.7502	14.7901	M1CBW4	Protein kinase CK2 alpha subunit
14.5312	14.5232	14.4862	14.3922	14.3379	14.4415	14.4697	14.7163	14.8824	14.7351	14.7819	14.9229	14.7573	14.7273	14.7842	14.8023	M1CBZ3	Heavy metal cation transport atpase
15.853	15.8133	16.0107	15.9173	16.4745	16.438	16.4596	16.5482	15.681	15.6837	15.6083	15.4999	15.2456	15.416	15.3741	15.2825	M1CC20	Formamidase
15.5122	15.4906	15.4237	15.4808	15.6573	15.6997	15.5227	15.2387	14.6715	14.6878	14.6618	14.3715	14.5042	14.6477	14.0995	13.9327	M1CC22	Peroxidase
16.3324	16.3799	16.3437	16.3375	16.7185	16.6352	16.6432	16.6316	15.9631	15.9288	15.8832	15.8794	15.7179	15.7664	15.7349	15.7232	M1CC25	Subtilisin-like protease
12.9949	13.0866	13.3244	13.1946	13.4633	13.2505	13.3122	13.4077	13.3271	13.2857	13.2582	13.1191	13.7127	13.8017	13.6949	13.7424	M1CC34	Metal transporter
13.7512	13.3546	13.963	13.8415	13.9854	13.2198	14.1054	13.7792	15.6701	15.769	15.7514	15.6673	15.7234	15.7981	15.8011	15.8605	M1CC70	Indole-3-acetic acid-amido synthetase GH3.6
15.8012	15.7363	15.5398	15.5924	14.809	14.6834	14.9366	14.8253	15.0971	15.2511	15.2966	15.2898	13.7108	14.246	14.1016	13.9761	M1CC88	NADPH-protochlorophyllide oxidoreductase
18.3295	18.2294	18.231	18.2	18.0891	17.9672	18.0019	17.9978	18.0625	18.0775	18.0545	18.1553	17.961	17.9392	17.919	17.9232	M1CCA0	60S ribosomal protein L8
16.9517	16.9204	17.0066	16.9827	17.1773	16.9873	17.0712	17.1914	16.6628	16.7013	16.5965	16.6544	16.659	16.8945	16.8071	16.7141	M1CCA9	NAD(P)H dehydrogenase (quinone)
20.3187	20.2558	20.3231	20.3303	20.3644	20.1854	20.3074	20.4472	20.4967	20.3652	20.3867	20.4361	20.4145	20.4587	20.4908	20.5151	M1CCD0	Thioredoxin
17.204	15.8726	15.7147	16.9943	16.9817	16.3754	16.6577	16.4657	15.3363	13.5449	14.2858	13.4335	12.6697	13.6102	14.6315	13.4716	M1CCD1	Cmp-2-keto-3-deoctulosonate (Cmp-kdo) cytidyltransferase
16.3895	16.4529	16.316	16.3522	16.4706	16.4539	16.4982	16.3556	16.4302	16.4003	16.3302	16.3749	16.5627	16.5163	16.484	16.5005	M1CCE3	Enolase-phosphatase E1
14.0149	13.6818	13.825	13.5206	15.0138	14.0814	14.3164	14.7504	14.6394	14.2839	14.3612	14.3228	14.9826	15.1602	15.0948	14.9563	M1CCE5	Copper ion binding protein
17.3547	17.4186	17.3951	17.3636	17.684	17.6342	17.6539	17.6229	17.2516	17.294	17.2922	17.2441	17.3647	17.4138	17.3842	17.3978	M1CCF1	ATP synthase 24 kDa subunit, mitochondrial;ATP synthase 24 kDa subunit, mitochondrial
14.8401	15.1538	14.8661	14.8399	14.8602	15.0745	15.0937	14.979	14.0937	13.8472	13.1049	14.1301	14.1087	13.819	13.7519	14.0775	M1CCF6	Uncharacterized protein
13.8	13.6208	14.0378	13.9665	13.9741	13.8917	14.026	13.9206	14.8936	14.8393	14.9751	14.9381	15.1032	15.4414	15.1088	15.1205	M1CCG0	Short-chain dehydrogenase/reductase family protein
16.3088	16.3671	16.3648	16.2688	16.2839	16.233	16.2698	16.2634	16.4124	16.5167	16.4097	16.4211	16.4224	16.3919	16.4953	16.4495	M1CCH5	Short-chain dehydrogenase/reductase
17.7687	17.88	17.654	17.7017	17.6705	17.602	17.5804	17.5765	17.6981	17.6576	17.6826	17.5233	17.7076	17.5781	17.695	17.6332	M1CCH8	One-helix protein
15.7202	15.7592	15.8091	15.7709	15.71	15.6715	15.7523	15.6645	15.537	15.4288	15.6547	15.5869	15.3645	15.1943	15.3067	15.4255	M1CCJ1	S1 RNA-binding domain-containing protein
15.5571	15.5299	15.5097	15.6315	15.9155	15.8576	15.8063	15.6505	15.4061	15.4468	15.4583	15.4256	15.6033	15.4287	15.4023	15.4164	M1CCJ2	Signal peptidase complex subunit 2
16.6508	16.7911	16.7092	16.6529	17.1796	17.024	16.9295	16.9618	16.5518	16.7272	16.4769	16.4311	16.6051	16.6294	16.6685	16.5658	M1CCJ9	Peroxidase
16.7831	17.1365	16.738	16.987	16.7082	16.8542	16.7233	16.7246	16.6816	16.7592	16.7332	16.7965	16.8298	16.8185	16.6856	16.5888	M1CCL3	N-acetyltransferase domain-containing protein
15.1698	15.3197	15.3724	15.3458	15.4377	15.348	15.5036	15.5157	16.0261	15.9821	16.0084	16.0484	16.2308	16.3659	16.2989	16.299	M1CCL6	All-trans-retinol 13,14-reductase
15.9825	16.0274	16.0416	15.9923	15.992	16.0165	15.9983	16.0393	15.8621	15.9056	15.8443	15.9236	15.7576	15.7998	15.7326	15.789	M1CCQ2	6-phosphogluconate dehydrogenase, decarboxylating
15.3437	15.328	15.3018	15.2961	15.5884	15.5603	15.4918	15.4877	15.7605	15.9421	15.8134	15.8843	15.9806	15.8093	15.8595	15.9041	M1CCR4	KH domain-containing protein
16.1178	16.1727	16.162	16.1618	16.0906	16.1948	16.1366	16.1558	15.6836	15.6797	15.7897	15.6681	15.525	15.5786	15.4544	15.4927	M1CCR8	Cystathionine gamma synthase
15.5632	15.4519	15.1376	15.3814	15.4249	15.1674	15.2851	15.4652	15.0721	15.1494	14.9593	15.0577	14.5582	14.4007	14.5404	14.3386	M1CCS3	UDP-glucose 6-dehydrogenase
15.6543	15.6604	15.6922	15.6753	16.1017	15.829	15.9722	16.0244	15.8553	15.7193	15.7433	15.7472	15.9786	15.9993	16.1065	16.0444	M1CCV4	RNA-binding glycine-rich protein
16.6116	16.6589	16.5287	16.6049	16.3877	16.567	16.4373	16.5558	16.064	16.2591	16.0919	16.1472	15.8945	15.912	16.0509	16.1412	M1CCV7	Uncharacterized protein
16.0506	16.022	16.0451	16.066	15.9717	15.8999	16.017	15.983	15.5446	15.5587	15.6018	15.6302	15.6309	15.6009	15.5663	15.6062	M1CCW9	ISPH protein
15.2346	15.3126	14.9557	14.8653	15.0381	15.1098	14.9114	15.1504	14.0942	14.0254	14.2559	14.5262	14.6541	14.2926	14.0512	14.3377	M1CCX0	Tyrosine--tRNA ligase
15.6069	15.7004	15.7268	15.5781	15.9614	15.9739	15.9573	15.9229	15.7896	15.7997	15.754	15.7998	15.9655	16.0029	15.8601	15.8916	M1CD27	Methylthioribose-1-phosphate isomerase
17.5525	17.4493	17.421	17.4348	17.3886	17.3435	17.433	17.3769	17.2763	17.2648	17.3136	17.3006	17.2258	17.2229	17.1862	17.1426	M1CD37	60S ribosomal protein L9
15.8855	15.8731	15.8705	15.799	15.8004	15.6778	15.7812	15.9178	15.9639	15.8882	15.9425	16.037	15.8834	15.9863	15.8999	15.9714	M1CD47	6,7-dimethyl-8-ribityllumazine synthase;6,7-dimethyl-8-ribityllumazine synthase
15.5753	15.6877	15.5933	15.4834	15.6721	15.846	15.7044	15.7463	15.5367	15.3879	15.6877	15.4712	15.8063	15.816	15.8705	15.7251	M1CD56	Exoenzymes regulatory protein aepA
16.0662	16.2803	16.1759	16.2587	16.4418	16.5207	16.4961	16.4148	15.4196	15.2731	15.39	15.4459	15.6807	15.6173	15.5498	15.6458	M1CDC1	L-idonate 5-dehydrogenase
16.374	16.4572	16.401	16.3559	16.6615	16.5777	16.569	16.5737	16.6998	16.6758	16.7177	16.6925	16.7875	16.7578	16.7302	16.7954	M1CDD9	Pyruvate kinase;Pyruvate kinase, cytosolic isozyme
15.3433	15.3964	15.3493	15.3713	15.6973	15.6913	15.5686	15.5979	15.5723	15.5477	15.4077	15.5585	15.5363	15.5973	15.5694	15.6065	M1CDE0	Alpha-galactosidase
17.5869	17.7819	17.5874	17.5602	17.7948	17.4342	17.4021	17.4499	17.2994	17.2024	17.034	16.7335	17.5363	16.953	17.2977	17.1718	M1CDE1	Uncharacterized protein
14.9063	15.0156	14.8853	14.9033	14.8883	14.9324	14.7556	14.7231	14.5988	14.6971	14.7501	14.6092	14.5035	14.3582	14.4904	14.5366	M1CDF4	Homoserine kinase
16.5154	16.4547	16.5275	16.5596	16.3463	16.2667	16.397	16.4528	16.4047	16.3827	16.3893	16.4568	16.2604	16.3785	16.3532	16.2317	M1CDG7	NAD(P)H dehydrogenase subunit M
15.3049	15.371	15.3987	15.2399	15.364	15.398	15.3216	15.2987	15.9009	15.9207	15.8933	15.9953	15.9986	15.9674	15.9959	15.9983	M1CDH4	Plasma membrane ATPase
16.2462	16.2849	16.2896	16.2021	16.5813	16.4491	16.3964	16.4251	16.3476	16.359	16.3285	16.3838	16.7255	16.7147	16.7163	16.7467	M1CDJ0	Hypersensitive-induced reaction protein
17.6723	17.8292	17.7144	17.7719	17.9331	18.0132	17.9487	17.9971	17.709	17.8351	17.7634	17.7911	17.8027	17.919	17.7248	17.856	M1CDK0	Uncharacterized protein
17.7291	17.8578	17.8403	17.7975	17.7647	17.8231	17.8546	17.8624	17.8059	17.951	17.8468	17.89	17.9749	17.9651	17.9691	18.0301	M1CDL1	ATP-dependent Clp protease proteolytic subunit
14.3659	14.1189	14.1465	14.0805	13.9512	13.9608	13.7527	14.0014	14.8914	14.8113	14.7892	14.7872	14.3669	14.4663	14.7394	14.4335	M1CDM5	Phototropin-1
14.4869	14.6213	14.5304	14.759	13.9148	13.9077	14.2902	14.2203	14.1214	13.4592	14.1005	13.8575	14.2035	13.5432	13.9067	13.9133	M1CDP5	Arogenate dehydratase
14.2224	13.9619	14.0751	14.0773	14.0352	14.277	14.169	14.3232	14.355	14.4434	14.5111	14.5511	14.5586	14.6838	14.4187	14.5275	M1CDQ1	4,5-DOPA dioxygenase extradiol
14.663	14.5458	14.5257	14.6208	14.9098	14.8466	14.7233	14.8824	15.0194	15.1381	15.063	15.1065	15.0583	15.0744	15.0278	15.0852	M1CDW4	DnaJ
15.6197	15.5272	15.5703	15.5904	15.3555	15.4423	15.5404	15.7412	13.7351	14.2329	13.9495	14.1337	13.1785	14.2862	13.6879	13.94	M1CDX2	Malate dehydrogenase
16.1887	16.213	16.1316	16.1969	16.1871	16.1118	16.1561	16.1568	16.302	16.2082	16.324	16.3563	16.5599	16.4034	16.4712	16.5779	M1CE34	CBS domain containing protein
14.3345	13.8392	13.8408	14.0401	11.9724	12.1101	11.8972	11.9052	13.6874	13.5394	13.6207	14.1013	12.3232	12.7053	11.4513	11.8195	M1CE49	Isocitrate lyase
15.2319	15.2546	15.184	15.0545	15.1008	14.628	15.0799	14.9549	15.5282	15.3232	15.3558	15.2495	15.4735	15.4704	15.4625	15.531	M1CE55	Peroxidase
17.1852	17.1785	17.1828	17.1953	17.2667	17.2284	17.2565	17.2431	17.1096	17.1201	17.1427	17.0624	17.1085	17.0645	17.066	17.1268	M1CEC3	Elongation factor 1-gamma
18.1697	18.1869	18.1007	18.1383	18.0751	18.0603	18.0491	18.0786	17.8489	17.9109	17.8132	17.8587	17.6829	17.7079	17.7161	17.726	M1CEF5	Ribosomal protein
15.7851	15.7337	15.9533	15.7938	15.938	15.8102	15.8362	15.9901	15.6164	15.2038	15.3248	15.4201	15.3789	15.5542	15.7271	15.2811	M1CEH2	Transferase, transferring glycosyl groups
14.9034	14.888	14.8331	14.7877	14.7137	14.445	14.6845	14.8331	14.6787	14.7751	14.7445	14.6295	14.6285	14.8104	14.7257	14.8346	M1CEH3	CRUMPLED LEAF
16.7199	16.7529	16.8236	16.6983	16.9577	16.8703	16.83	16.7434	16.4703	16.6132	16.5196	16.564	16.663	16.6083	16.5114	16.6327	M1CER2	Uncharacterized protein
16.242	16.3277	16.2534	16.2036	16.1733	16.2208	16.1169	16.1175	16.0594	16.0244	16.0276	16.1316	16.2283	16.1421	16.1754	16.1804	M1CER3	Patellin-3
15.6601	15.725	15.6032	15.5576	15.6039	15.6286	15.5899	15.5979	16.0576	16.024	16.0453	15.9751	16.0605	15.8984	16.0334	16.1203	M1CER6	Hydrolase
15.7581	15.8185	15.8497	15.7952	16.0125	16.0099	16.0429	16.013	16.2385	16.1436	16.1853	16.1556	16.4462	16.4707	16.4813	16.4414	M1CEU1	Uncharacterized aarF domain-containing protein kinase, chloroplastic
13.5721	13.7581	13.7823	13.8795	14.1527	13.8137	13.5732	13.8449	15.8871	15.8672	15.684	15.6134	16.1618	16.1753	16.1836	16.1833	M1CF15	Sterol regulatory element-binding protein site 2 protease
15.206	14.9601	15.0762	15.0235	14.9909	15.0113	15.0239	15.0372	14.8302	15.0929	15.0824	15.0828	15.0106	14.9492	14.5015	14.8034	M1CF38	Zinc finger protein
16.3232	16.3308	16.3002	16.316	16.3278	16.271	16.1985	16.259	16.4242	16.4033	16.4007	16.3725	16.4263	16.3554	16.4019	16.3582	M1CF88	Polyadenylate-binding protein
14.9729	15.0991	14.6679	14.7728	15.4706	15.4134	15.4585	15.3301	15.3829	15.5723	15.5097	15.3841	14.6302	15.3894	15.1021	15.352	M1CFH2	CXE carboxylesterase
12.6415	12.9905	13.4326	12.9078	13.7414	13.7759	13.6964	13.5956	13.7786	13.5953	13.5843	13.6642	13.3497	13.3163	13.5645	13.5622	M1CFH3	CXE carboxylesterase
15.4348	15.5071	15.5902	15.5137	15.9275	15.6401	15.7248	15.7993	15.1261	15.2547	14.9677	14.9418	14.9854	14.814	15.0534	14.9447	M1CFH5	Gibberellin receptor GID1
17.2849	17.3288	17.3268	17.349	17.4078	17.4091	17.4322	17.3888	17.4352	17.441	17.435	17.4099	17.4536	17.4466	17.4654	17.4571	M1CFH9	ATPREP1
16.9832	16.9356	16.9381	17.0096	16.6703	16.6917	16.7394	16.7256	16.9427	16.9807	16.9796	16.9434	16.4328	16.5197	16.4602	16.4423	M1CFI4	Nitrite reductase
14.3899	14.4291	14.2492	14.4442	14.142	14.6359	14.4661	13.9797	14.9933	15.2713	15.0446	15.1407	15.0496	15.0057	14.661	14.5434	M1CFP1	Brg-1 associated factor
14.4611	14.5951	14.625	14.5634	14.1763	14.2173	14.0009	14.2561	13.5302	13.697	13.9633	13.832	13.6083	13.6005	13.4506	13.6953	M1CFQ3	Uncharacterized protein
15.7642	15.9397	15.8452	15.7362	16.244	16.1579	16.1996	16.1642	15.9952	16.0193	15.9808	15.9398	16.0879	16.1269	16.094	16.0913	M1CFQ4	S-methyl-5-thioribose kinase
15.0914	14.9801	15.1737	15.1698	15.2957	15.4221	15.3533	15.3536	15.2098	14.7337	15.0483	14.9647	15.2972	15.1942	15.0889	15.3387	M1CFQ5	Glycosyltransferase
18.9674	19.032	18.885	18.9087	18.9868	18.9618	18.8807	18.9082	19.1294	18.9585	19.0898	19.1188	19.1878	19.1772	19.1501	19.0329	M1CFR0	Tic21
13.358	13.2903	13.4477	13.4351	13.4353	13.6038	13.4553	13.3138	13.334	13.6785	13.4166	13.3086	13.5257	13.5162	13.5509	13.395	M1CFR9	Phosphoprotein phosphatase
15.5228	15.6595	15.7009	15.4368	16.177	15.9253	16.0548	16.1886	14.7548	14.5315	14.5948	14.9597	14.8178	15.0433	15.0696	15.0965	M1CFS3	Glycosyltransferase
15.7747	16.1051	16.0006	16.0194	16.7078	16.6074	16.5811	16.5678	15.8488	15.808	15.8015	15.7504	16.5977	16.5517	16.5501	16.6724	M1CFT0	Glycosyltransferase
16.5857	16.5104	16.6417	16.4985	16.7401	16.6374	16.7352	16.6963	16.9575	17.0381	16.9529	16.9311	16.9945	16.8685	16.9414	17.007	M1CFT3	Uncharacterized protein
16.9916	16.9648	16.9812	16.8603	16.8694	16.9811	16.9175	17.0502	16.1971	16.3982	16.2386	16.3582	16.1843	15.9834	16.2798	16.2101	M1CFU8	Thioredoxin M3, chloroplastic;Thioredoxin M3, chloroplastic
14.2379	14.2352	14.2132	14.2991	14.5227	14.4405	14.5522	14.5999	14.2577	14.1971	13.6678	14.1739	14.0609	14.1656	14.226	14.172	M1CFV2	Methylcrotonoyl-CoA carboxylase beta chain, mitochondrial;Methylcrotonoyl-CoA carboxylase beta chain, mitochondrial;Methylcrotonoyl-CoA carboxylase beta chain, mitochondrial;Methylcrotonoyl-CoA carboxylase beta chain, mitochondrial
15.562	15.563	15.5793	15.5268	15.8292	15.7786	15.626	15.6527	14.3105	13.9847	14.25	14.1971	14.0792	14.0805	14.0138	13.8753	M1CFY0	Carboxypeptidase
17.0665	17.0731	17.0801	17.0742	17.1044	17.1144	17.1966	17.1749	17.5164	17.4955	17.5118	17.5694	17.5054	17.5981	17.5014	17.5097	M1CFZ0	N-acetyl-glutamate semialdehyde dehydrogenase
13.2714	13.5678	13.5238	13.4265	14.1164	14.5225	14.1657	14.3152	15.6583	15.5274	15.6414	15.8318	16.1325	16.029	16.0493	16.1442	M1CFZ7	Methylketone synthase Ib
14.8971	15.0073	15.0214	15.0523	14.8421	15.418	14.9886	15.2679	15.1271	15.1091	15.2574	15.5491	15.3132	15.3283	15.3344	14.4903	M1CG01	Methylketone synthase Ib
11.8682	11.9345	12.2923	12.1259	12.0653	11.7652	13.0437	12.2474	11.8377	11.9322	12.159	12.0242	11.8145	12.1339	11.2409	11.6278	M1CG22	Uncharacterized protein
14.1061	14.0325	14.1872	13.9463	14.2808	14.0763	14.1441	14.3009	14.046	13.7421	13.8583	13.8335	13.9655	14.0527	14.0467	14.0733	M1CG86	Uncharacterized protein
16.1742	16.1152	16.1578	16.055	16.265	16.0984	16.1472	16.1566	15.907	16.0286	15.913	15.9349	15.955	15.96	15.9345	15.8736	M1CGC1	Nuclear RNA binding protein
15.5013	15.3418	15.4232	15.4641	15.3804	15.2288	15.3297	15.2614	15.0808	15.0632	15.1742	15.2231	14.7843	14.8561	14.5571	14.7714	M1CGC9	3-phosphoshikimate 1-carboxyvinyltransferase
16.269	16.223	16.2603	16.175	15.9101	15.8437	15.9102	15.9311	16.2945	16.2013	16.311	16.2418	16.1136	16.1304	16.1772	16.1653	M1CGD8	Phosphatidate cytidylyltransferase
14.9038	14.926	14.8816	14.8292	14.9078	14.8632	14.6801	14.8283	14.8363	14.495	14.7445	14.6323	14.7654	14.7722	14.7726	14.8163	M1CGE2	Uncharacterized protein
15.2175	15.2679	15.1641	15.2365	15.4973	15.3612	15.3616	15.2758	15.3093	15.3426	15.2939	15.4049	15.4492	15.2981	15.4518	15.3804	M1CGF6	CCT-alpha
14.3616	14.3235	14.2919	14.6141	15.0898	14.8922	15.0091	14.961	14.6721	14.8785	14.4949	14.9132	15.0181	14.8587	14.9642	15.0015	M1CGG0	Elongation factor G, mitochondrial
14.7398	14.6696	14.9314	14.9299	14.8666	14.7217	14.7698	15.0243	14.8581	14.94	14.7954	14.8374	14.8217	14.8648	14.9632	14.9451	M1CGJ9	COP9 signalosome complex subunit 7
13.0568	12.5525	13.1989	12.9407	13.0491	12.4485	12.7309	12.8166	13.3	12.8913	13.2486	13.4478	12.4816	13.6089	13.1939	13.4613	M1CGL9	ATVPS11;Vacuolar protein sorting-associated protein 11 homolog
16.7079	16.8787	16.7945	16.7802	16.8916	16.9319	16.8735	16.8584	16.4386	16.6755	16.4354	16.5885	16.3574	16.3298	16.4366	16.6563	M1CGN0	Pit2 protein
17.248	17.107	17.0546	17.1413	16.7248	16.5346	16.5273	16.6399	16.9222	16.6169	16.7995	16.8544	16.5974	16.5396	16.6097	16.7037	M1CGN3	50S ribosomal protein L21
17.173	17.0849	16.9817	16.9796	16.9528	17.0642	16.929	16.7942	17.0677	17.1653	17.1203	17.1518	17.1746	16.8419	16.9725	16.865	M1CGU5	Salt tolerance protein 4
15.4812	15.5959	15.3724	15.4725	15.6949	15.8786	15.8587	15.8078	15.8838	15.9365	15.811	15.7115	15.9425	15.9373	15.9697	15.8462	M1CGU6	Protein-tyrosine phosphatase 1, plants
17.2355	17.2423	17.2596	17.1821	17.234	17.2013	17.2859	17.3502	17.1825	17.3547	17.2075	17.2939	17.1661	17.3316	17.3856	17.199	M1CGU8	23 kDa subunit of oxygen evolving system of photosystem II
15.3196	15.3051	15.3149	15.3167	15.394	15.3205	15.3336	15.3984	15.449	15.3305	15.3633	15.3878	15.3567	15.3362	15.3605	15.4172	M1CGV3	T-complex protein 1 subunit eta
14.6365	14.701	14.7613	14.7168	14.945	14.9782	14.9773	15.0161	14.87	14.9108	14.8585	14.8849	14.9758	15.029	15.026	14.9536	M1CGX3	Vesicle-associated membrane protein
13.6401	14.1593	14.1021	14.3063	14.8835	15.0537	14.7447	14.8802	14.4169	14.7001	14.3813	14.4391	14.3844	14.4658	14.4839	14.654	M1CGX8	USP family protein
15.3952	15.4518	15.2488	15.3452	15.1689	14.9907	14.9689	14.9547	15.278	15.0969	15.341	15.3119	15.2389	15.1523	15.1942	15.2469	M1CH18	Cyclin
16.1991	16.213	16.2672	16.2666	16.3315	16.3238	16.3114	16.3002	16.313	16.159	16.2721	16.2175	16.4949	16.5052	16.4896	16.4924	M1CH68	Beta-amylase
17.2096	17.3255	17.2181	17.1968	17.2275	17.2903	17.2612	17.1867	17.2358	17.349	17.2753	17.2539	17.3858	17.3435	17.3251	17.3538	M1CH96	ATP-dependent Clp protease proteolytic subunit
15.4233	15.5456	15.462	15.389	15.9484	15.7373	15.7584	15.7359	16.5034	16.4071	16.4863	16.4027	16.5581	16.5861	16.5888	16.5758	M1CHA7	Monoxygenase
16.1048	16.0947	16.0572	16.0063	16.1441	16.1957	15.9968	16.1099	15.9954	16.2076	16.1241	15.9845	15.8261	16.0455	15.9522	15.7231	M1CHB0	Methylglutaconyl-CoA hydratase, mitochondrial;Methylglutaconyl-CoA hydratase, mitochondrial;Methylglutaconyl-CoA hydratase, mitochondrial
16.5006	16.4137	16.2225	16.3054	15.7281	15.8221	15.8024	15.797	15.8667	16.0706	15.9904	16.0078	15.5264	15.4614	15.5959	15.7187	M1CHE2	Transcription factor
16.2717	16.3501	16.4009	16.3397	16.7995	16.6835	16.7224	16.7728	16.3969	16.3783	16.3511	16.3521	16.5267	16.5522	16.5638	16.5238	M1CHE3	Isocitrate dehydrogenase [NAD] subunit, mitochondrial
17.8027	17.7899	17.6485	17.71	17.3268	17.3258	17.2487	17.2223	17.4989	17.4666	17.5136	17.4871	17.351	17.2273	17.2862	17.3293	M1CHF5	50S ribosomal protein L19-2, chloroplastic
16.5314	16.4741	16.732	16.5782	16.2829	16.6208	16.3396	16.2376	16.826	16.8009	16.7704	17.0862	17.2759	16.945	16.9238	16.9927	M1CHI0	Phytocyanin-like arabinogalactan-protein
19.2298	19.27	19.2497	19.2394	19.2725	19.3023	19.2882	19.2485	19.2195	19.2719	19.2112	19.2069	19.3203	19.3545	19.3216	19.3362	M1CHJ4	Glutathione peroxidase
15.4378	15.3863	15.3476	15.3521	15.7226	15.7876	15.5143	15.6604	15.3123	15.4249	15.3283	15.2569	15.4148	15.3647	15.3894	15.4472	M1CHJ9	ER membrane protein complex subunit 4
19.2771	19.3359	19.3066	19.2379	19.3606	19.3601	19.275	19.3068	18.871	18.9486	18.8624	18.8188	19.0309	19.012	19.0573	19.0563	M1CHK3	Peptidylprolyl isomerase
16.1466	16.1946	16.2186	16.199	16.4808	16.4129	16.4036	16.3663	16.6568	16.7104	16.6902	16.626	16.7295	16.7192	16.5812	16.6982	M1CHP4	Arginine/serine-rich splicing factor
15.7174	15.6321	15.7787	15.7778	15.7791	15.6895	15.742	15.8343	15.6038	15.3687	15.6244	15.5751	15.5014	15.6207	15.6296	15.6069	M1CHQ6	Bifunctional nitrilase/nitrile hydratase NIT4B
15.6973	15.705	15.7732	15.6851	15.9618	15.8452	15.9004	15.8738	15.6298	15.7077	15.6249	15.6591	15.6988	15.7922	15.6972	15.5749	M1CHR3	N-carbamoylputrescine amidase
15.5682	15.6443	15.7349	15.7425	15.7668	15.8336	15.9754	15.9542	15.4169	15.6619	15.5072	15.5688	15.519	15.7426	15.6613	15.4974	M1CHU9	F1F0-ATPase inhibitor protein
13.3581	13.0673	13.1581	13.3215	12.583	12.7162	12.6313	12.912	13.1374	13.2054	13.0858	13.0469	13.3421	13.2778	13.4112	13.4463	M1CI04	Myosin heavy chain
16.2223	16.3384	16.296	16.2118	16.2323	16.0888	15.9918	16.085	16.0491	15.8676	15.9843	16.0454	16.1871	16.14	16.0516	16.1566	M1CI12	Hexose transporter
15.3603	15.2921	15.416	15.3725	15.3035	15.2924	15.3333	15.3375	15.5513	15.4849	15.5695	15.5533	15.3938	15.5009	15.3904	15.2587	M1CI66	Sucrose-phosphate synthase
13.8343	14.0891	13.8237	13.9814	14.3579	13.9947	14.0164	14.1355	14.3922	14.1178	14.1382	14.1581	14.5113	14.6366	14.6215	14.6983	M1CI68	Beta-galactosidase
13.7717	13.5899	13.7851	14.0927	13.8721	13.0989	13.1292	13.5375	13.6349	13.1009	13.5097	13.7222	13.2134	13.6532	13.3907	13.412	M1CIA4	Cell division protein FtsH
15.1556	15.1682	14.995	15.1038	14.5311	14.7891	14.5817	14.619	15.2474	15.337	15.3935	15.4794	15.1415	15.0841	15.0746	15.0102	M1CIA9	Malic enzyme
16.1614	16.3724	16.1878	16.1482	14.6269	15.285	13.8935	14.7072	14.5262	13.1569	14.13	13.0793	12.9796	13.6041	12.9132	13.6374	M1CIC8	4-coumarate--CoA ligase
14.1031	14.1337	14.0788	14.1988	14.4032	14.291	14.375	14.413	14.0263	14.2476	14.1095	14.4088	14.2652	14.2546	14.1018	14.4507	M1CID8	Cysteine proteinase inhibitor
16.4124	16.4299	16.478	16.5347	16.4147	16.5226	16.5629	16.5736	16.1829	16.3394	16.3259	16.4672	16.292	16.4857	16.495	16.4492	M1CIE4	Transcription regulator
[truncated: 670 more rows]

## Sheet: Sig GI vs GC
GC1	GC2	GC3	GC4	GI1	GI2	GI3	GI4	IC1	IC2	IC3	IC4	II1	II2	II3	II4	Student's T-test Significant GI_GC	Student's T-test significant	-Log Student's T-test p-value GI_GC	FDR	FC	Student's T-test Test statistic GI_GC	Protein ID
18.2624	18.2412	18.2644	18.2936	18.2198	18.2126	18.2017	18.2196	18.251	18.1291	18.2444	18.2624	18.2314	18.1673	18.1629	18.1925	+	GI_GC	2.38534	0.0120244	-0.0519791	-0.465933	A0A0B4J3K8
17.9156	17.8114	17.814	17.7985	17.7822	17.7241	17.664	17.7065	17.665	17.6388	17.616	17.6364	17.5308	17.4268	17.4854	17.5107	+	GI_GC	1.7111	0.0408418	-0.115679	-0.847135	A4UV11
16.4987	16.523	16.5491	16.516	16.7716	16.7824	16.7104	16.6708	16.8419	16.6904	16.7788	16.7717	16.9127	16.852	16.9149	16.9826	+	GI_GC	3.53376	0.00179103	0.212123	1.6531	A8UGP3
16.7616	16.9078	16.8743	16.8022	17.2619	17.249	17.2061	17.2323	16.5579	16.6649	16.5428	16.6191	16.5431	16.5477	16.6947	16.6564	+	GI_GC	4.54602	0.000446559	0.400839	2.96021	B3F8F4
16.9377	16.7889	16.763	16.7883	16.6453	16.6562	16.6744	16.7313	16.7801	16.7879	16.8442	16.8144	16.0489	16.0867	16.0704	15.96	+	GI_GC	1.74502	0.038377	-0.142653	-0.989192	B5M4B1
18.849	18.8065	18.8746	18.8586	18.9727	18.8936	18.9389	18.9625	18.8119	18.768	18.783	18.7434	18.9138	18.9528	18.9329	19.0013	+	GI_GC	2.22097	0.016192	0.0947576	0.771428	D5ILC3
16.2478	16.1401	16.0206	16.2336	16.0575	15.8618	15.8745	15.843	15.3851	15.4362	15.4547	15.5195	14.6501	14.7701	14.5597	14.4734	+	GI_GC	1.87884	0.0303076	-0.251331	-1.45852	E1AXT4
15.1707	15.2303	15.2345	15.1432	15.571	15.5451	15.4643	15.4671	15.7035	15.7401	15.6685	15.678	15.7114	15.7207	15.6756	15.6671	+	GI_GC	3.97434	0.000953344	0.317221	2.34466	J9ULI1
15.9601	16.0014	15.9307	15.8586	16.2336	16.1857	16.1103	16.184	15.9864	15.7367	15.8105	15.8384	15.6473	15.4791	15.7323	15.8021	+	GI_GC	3.05611	0.00385774	0.240715	1.7266	K7W5R9
16.1828	16.1089	16.1105	16.1052	16.3709	16.2702	16.2483	16.294	16.5242	16.4533	16.4518	16.4852	16.3201	16.3682	16.3639	16.322	+	GI_GC	2.69109	0.00694212	0.169024	1.27494	K7WNV9
16.4345	16.3905	16.4299	16.4362	16.7545	16.578	16.7033	16.6002	16.7287	16.7126	16.6767	16.6746	17.0306	16.9906	16.9523	16.9509	+	GI_GC	2.80152	0.00585464	0.236233	1.64849	K7WNY2
18.2021	18.2092	18.2609	18.274	18.3616	18.4703	18.4197	18.3621	18.3641	18.3815	18.4027	18.4318	18.5057	18.5932	18.4722	18.4562	+	GI_GC	2.71664	0.00668457	0.166878	1.26626	K7WP02
17.3252	17.355	17.3217	17.2979	17.1586	17.2001	17.1674	17.0962	17.3471	17.4101	17.3804	17.4507	17.339	17.2412	17.2981	17.2834	+	GI_GC	3.32667	0.00246668	-0.169363	-1.35841	K7WU45
15.8314	15.7215	15.664	15.6844	15.609	15.541	15.4012	15.614	15.3412	15.2624	15.4555	15.2526	15.2254	15.1681	15.1833	15.3195	+	GI_GC	1.6004	0.0499481	-0.183993	-1.13548	K7XKP4
17.6936	17.5738	17.6453	17.6316	17.5524	17.4901	17.5331	17.5558	17.5271	17.4717	17.501	17.541	17.4098	17.3887	17.4113	17.3971	+	GI_GC	1.9298	0.0276577	-0.103237	-0.8009	K7XKT4
16.9096	16.8829	16.8753	16.8583	17.0501	16.9801	17.0338	17.1356	16.5498	16.6619	16.602	16.6946	16.2656	16.4149	16.3612	16.4482	+	GI_GC	2.59098	0.00822698	0.168348	1.25657	K7XKT7
14.6655	14.5726	14.5863	14.6596	14.2834	14.2187	14.3417	14.4338	14.7126	14.6503	14.7564	14.714	14.3861	14.3972	14.4312	14.381	+	GI_GC	2.95338	0.00457206	-0.301614	-1.98866	M0ZG32
15.697	15.6791	15.8034	15.7336	16.2101	16.1507	16.1349	16.1275	15.8878	15.8011	15.8633	15.8128	16.0417	16.1183	16.1743	16.1412	+	GI_GC	4.86418	0.000305062	0.427505	3.20764	M0ZG39
15.0478	15.1178	15.0275	15.0514	15.8033	15.2104	15.489	15.6623	15.2285	15.2279	15.1515	15.3265	15.2447	14.7948	14.5143	14.7819	+	GI_GC	2.0055	0.0240457	0.480151	2.09547	M0ZG93
15.3864	15.4657	15.5033	15.3891	15.5709	15.5917	15.5692	15.5934	15.2908	15.2965	15.2365	15.3854	15.3191	15.4188	15.3166	15.3634	+	GI_GC	2.5613	0.00868364	0.145149	1.11912	M0ZGA7
13.1638	13.2494	13.3164	13.2064	13.7646	13.5371	13.4496	13.5683	13.4027	12.7965	13.2726	13.2644	13.1896	13.2708	13.3219	13.3652	+	GI_GC	2.46538	0.010305	0.345891	1.98746	M0ZH30
15.7442	15.7066	15.644	15.5373	15.9514	15.9802	15.9749	16.1155	15.5539	15.4074	15.6268	15.6815	15.7052	15.6159	15.6939	15.7347	+	GI_GC	2.98985	0.00431665	0.347435	2.19109	M0ZHA9
14.5119	14.4197	14.6144	14.5245	14.8891	14.6206	14.8494	14.7228	14.6298	14.5695	14.602	14.6033	14.7319	14.8494	14.7886	14.7363	+	GI_GC	1.87079	0.0307689	0.252857	1.46095	M0ZHB0
18.2135	18.2145	18.2674	18.2139	18.3955	18.4004	18.4783	18.4022	18.2769	18.2948	18.2863	18.2672	18.3677	18.4251	18.3791	18.3025	+	GI_GC	3.70174	0.00138128	0.191796	1.54833	M0ZHD0
15.5388	15.6212	15.5234	15.616	15.9087	15.8629	15.8315	15.82	15.7482	15.7761	15.8145	15.7132	15.8677	16.0123	15.8346	15.9319	+	GI_GC	3.89579	0.00105041	0.280958	2.12394	M0ZHQ8
16.1785	16.2137	16.1944	16.1441	16.1326	16.0296	16.0528	16.1293	15.7504	15.8217	15.8351	15.8759	15.7746	15.7527	15.8623	15.8056	+	GI_GC	1.73079	0.0394473	-0.0965862	-0.741956	M0ZHR2
16.1375	16.0866	16.0664	16.1435	15.6001	15.7173	15.7023	15.6514	15.5724	15.6519	15.6515	15.696	15.3626	15.4129	15.3028	15.2947	+	GI_GC	4.98826	0.000292528	-0.440724	-3.32211	M0ZHR6
20.9263	20.9625	20.8526	20.8415	21.3122	21.1287	21.335	21.1227	20.1797	20.4024	20.0686	20.0951	20.345	20.422	20.4184	20.3607	+	GI_GC	2.65961	0.00730547	0.32893	2.00187	M0ZHX4
15.2394	15.3405	15.2884	15.3068	15.5474	15.5291	15.4643	15.4418	14.3018	14.0644	14.3112	14.1555	14.3601	14.3403	14.3585	14.3528	+	GI_GC	3.06445	0.00381573	0.201882	1.51864	M0ZHY5
13.3714	13.2749	13.2232	13.3131	13.9691	13.5972	13.484	13.513	15.0659	15.0671	15.0668	15.1351	14.8945	14.7879	14.8771	14.8167	+	GI_GC	1.60158	0.0498501	0.345176	1.59578	M0ZI18
15.618	15.5477	15.7306	15.7516	16.4099	16.3042	16.2143	16.1221	15.811	15.7243	15.7348	15.667	15.939	15.7584	15.8303	15.9099	+	GI_GC	3.59658	0.00161656	0.60065	3.37241	M0ZI24
18.5003	18.5237	18.401	18.4089	18.0694	18.1266	18.0953	18.0568	18.2243	18.2906	18.2783	18.2443	18.0638	18.0009	18.0301	17.9897	+	GI_GC	4.39075	0.000519339	-0.371461	-2.75322	M0ZI35
15.4837	15.5364	15.53	15.5763	15.5856	15.7309	15.6267	15.6887	15.6474	15.6756	15.6535	15.6598	15.7275	15.7655	15.7539	15.6404	+	GI_GC	1.8274	0.0333173	0.126381	0.919776	M0ZI69
16.1298	16.0703	16.0395	16.0795	16.0154	15.9875	15.9661	16.0199	15.9521	15.7944	15.898	15.9079	15.8958	15.9154	15.85	15.9596	+	GI_GC	1.97301	0.0254506	-0.0825422	-0.673359	M0ZI78
18.2163	18.1621	18.1295	18.1094	17.516	17.6634	17.7457	17.8161	17.2588	17.6809	17.3846	17.6348	17.1471	17.2608	17.3805	17.4183	+	GI_GC	3.31844	0.00249627	-0.46903	-2.7822	M0ZI81
18.7682	18.859	18.7464	18.6623	17.9822	18.2034	18.2792	18.1938	17.7058	18.2901	17.7817	18.0541	17.6988	17.739	17.9637	17.9561	+	GI_GC	3.65374	0.00149218	-0.594314	-3.38709	M0ZI82
17.5473	17.5971	17.648	17.6259	17.7904	17.8221	17.8054	17.7694	17.5524	17.6061	17.5423	17.5869	17.8073	17.81	17.8025	17.8339	+	GI_GC	3.6492	0.00149966	0.192256	1.54474	M0ZI96
15.4772	15.5242	15.5757	15.5229	16.1942	15.9992	16.0318	16.0349	16.1953	16.138	16.1558	16.2286	16.441	16.4253	16.3712	16.4147	+	GI_GC	4.51977	0.000453063	0.540021	3.64369	M0ZI98
18.463	18.4881	18.4044	18.475	18.1455	18.1404	18.1974	17.9903	17.963	18.2633	17.9674	18.1088	18.053	17.8422	17.9188	17.9878	+	GI_GC	3.38251	0.00225095	-0.339208	-2.28782	M0ZIB8
16.3256	16.2883	16.198	16.1787	15.8588	15.9287	15.6243	15.6427	16.1774	16.2442	16.0938	16.2904	16.0118	15.7399	15.9547	16.0098	+	GI_GC	2.91522	0.0048934	-0.483963	-2.62571	M0ZIC3
16.866	16.7745	16.8056	16.7858	16.4182	16.4684	16.5119	16.5584	16.6475	16.7133	16.7417	16.8171	16.5233	16.5629	16.5644	16.5593	+	GI_GC	3.92098	0.00100345	-0.31876	-2.33954	M0ZIF6
18.0354	18.1242	18.1017	18.0439	18.2004	18.1718	18.1829	18.1455	18.0343	18.1354	17.9907	17.9609	18.2351	18.2849	18.3148	18.2836	+	GI_GC	2.1591	0.0181228	0.0988402	0.793471	M0ZIF8
14.1775	14.173	14.2785	14.1584	14.4366	14.3308	14.289	14.3107	14.9453	14.9338	14.8796	14.9381	15.3501	15.3298	15.3254	15.3067	+	GI_GC	1.83255	0.0329799	0.144947	1.01519	M0ZIM5
15.0859	15.1024	14.9306	15.0227	15.2303	15.1339	15.1863	15.1384	15.1267	15.0565	14.9727	15.197	15.2081	15.2779	15.1258	15.15	+	GI_GC	1.6395	0.0464085	0.136827	0.943142	M0ZIM7
18.3292	18.2778	18.2449	18.2998	17.9588	17.9428	18.0923	18.0265	18.0277	18.1289	18.115	18.1259	17.9331	18.1018	17.8923	17.88	+	GI_GC	3.48143	0.00192588	-0.282835	-2.04068	M0ZIN1
17.4227	17.4218	17.4078	17.3812	17.3066	17.3589	17.2959	17.2657	17.2001	17.1858	17.2056	17.2344	17.1499	17.2632	17.1699	17.1653	+	GI_GC	2.46976	0.0102252	-0.101592	-0.834769	M0ZIN8
14.6191	14.6786	14.715	14.661	14.8595	14.8263	14.7204	14.8719	14.809	14.8667	14.8938	14.9496	14.8528	14.8915	14.908	14.915	+	GI_GC	2.04691	0.0221621	0.151076	1.08093	M0ZIP5
17.0001	16.9304	16.8083	16.8615	16.4831	16.4555	16.474	16.4927	16.45	16.4531	16.5016	16.5278	16.158	16.2227	16.201	16.1499	+	GI_GC	4.2349	0.000639509	-0.423737	-2.97542	M0ZIP7
14.2074	14.2915	14.4035	14.5164	14.6024	14.5748	14.5682	14.5645	15.1352	15.0993	15.0968	15.1222	15.4562	15.5301	15.4354	15.5243	+	GI_GC	1.77841	0.0362914	0.222759	1.32792	M0ZIV1
16.0853	16.2241	16.2147	16.1555	16.4582	16.453	16.4898	16.4845	16.5371	16.4635	16.4968	16.547	16.6844	16.7163	16.613	16.66	+	GI_GC	3.99039	0.000939584	0.301491	2.26131	M0ZJ08
16.3682	16.3746	16.4452	16.3665	16.6143	16.4857	16.5766	16.6783	16.2648	16.3355	16.1933	16.245	16.1553	16.2534	16.1893	16.1064	+	GI_GC	2.38619	0.012014	0.200072	1.38484	M0ZJ17
14.1018	14.1534	14.1525	14.3964	15.2885	14.9946	15.2009	15.2677	13.4595	13.3114	13.4371	13.2971	12.9199	13.1093	12.9063	11.7777	+	GI_GC	4.35076	0.000550973	0.986901	5.07991	M0ZJC9
16.7129	16.6694	16.6906	16.706	16.4893	16.5827	16.6359	16.5131	16.6373	16.6804	16.689	16.8048	16.5465	16.6351	16.4901	16.4893	+	GI_GC	2.15253	0.0183632	-0.139469	-1.03479	M0ZJD3
15.4836	15.4727	15.468	15.4573	15.5811	15.58	15.5542	15.5933	15.6168	15.654	15.6606	15.6917	15.7878	15.7746	15.7417	15.7315	+	GI_GC	4.43509	0.000491593	0.106739	0.97162	M0ZJM5
17.6887	17.681	17.7459	17.6334	17.3554	17.426	17.3287	17.3287	17.5635	17.4777	17.6344	17.5562	17.2993	17.2134	17.2794	17.3346	+	GI_GC	4.2523	0.000627293	-0.327539	-2.47098	M0ZJN7
15.9857	15.9474	16.0591	16.0015	16.4979	16.315	16.3528	16.4442	16.2981	16.2165	16.2534	16.2329	16.4625	16.5253	16.4682	16.4869	+	GI_GC	3.82429	0.0011696	0.404032	2.73351	M0ZJT7
18.3115	18.3097	18.0528	18.2461	17.9791	17.9554	17.8971	17.6899	17.8514	17.8472	17.8314	17.8365	17.8243	17.799	17.4226	17.6699	+	GI_GC	2.09623	0.020175	-0.349632	-1.84288	M0ZJV9
15.5932	15.4845	15.5527	15.5142	15.3821	15.3564	15.3488	15.3699	15.4844	15.415	15.4729	15.5586	15.4966	15.4593	15.4728	15.4315	+	GI_GC	3.35757	0.00234787	-0.171856	-1.378	M0ZJY6
16.907	17.0045	17.0131	16.9625	17.1432	17.1714	17.1602	17.151	16.9691	17.064	16.9505	16.9575	17.2042	17.2165	17.195	17.1913	+	GI_GC	3.49953	0.0018816	0.184662	1.47718	M0ZJY9
13.7612	13.4636	13.4471	13.3965	13.1673	13.0214	13.199	13.1969	13.2709	13.1778	13.1169	13.2234	13.2449	12.9064	12.9226	12.9826	+	GI_GC	2.14716	0.0185169	-0.370925	-1.92437	M0ZJZ8
13.8959	14.1508	14.115	14.1568	14.3453	14.3466	14.3379	14.5161	14.3115	14.1526	14.3081	14.2401	14.2584	14.4167	14.1654	14.2868	+	GI_GC	2.17845	0.0174525	0.306852	1.74815	M0ZK80
15.1596	15.2921	15.2189	15.1861	15.0029	15.076	15.0325	14.9407	15.2384	15.1891	15.2748	15.2756	15.248	15.2336	15.2145	15.2415	+	GI_GC	2.60435	0.00806481	-0.201169	-1.43337	M0ZKA6
15.5306	15.4379	15.4672	15.5765	15.3126	15.2618	15.3427	15.3616	16.0447	15.9564	16.0313	16.0511	16.1293	16.1868	16.0475	16.1247	+	GI_GC	2.53082	0.00917382	-0.183381	-1.32826	M0ZKJ3
17.3633	17.2919	17.2786	17.2679	17.2093	17.2165	17.079	17.1443	17.2509	17.2344	17.2353	17.246	17.2142	17.2507	17.2385	17.1832	+	GI_GC	1.92906	0.027664	-0.138157	-0.996141	M0ZKM5
16.5048	16.6311	16.678	16.6083	16.8979	17.0246	16.9549	16.9878	16.7646	16.7728	16.7146	16.852	16.9826	17.1264	17.0892	16.8848	+	GI_GC	3.67538	0.00144144	0.360731	2.48105	M0ZKQ8
15.8452	15.8408	15.9416	15.883	16.2686	16.167	16.179	16.2461	15.7743	15.832	15.8567	15.8683	15.9097	16.058	15.939	15.9991	+	GI_GC	4.2107	0.000667898	0.337487	2.51647	M0ZKQ9
15.6882	15.818	15.7518	15.774	16.1175	16.0797	16.02	15.9971	16.0121	15.8804	15.9924	16.0056	15.8536	15.9195	15.8904	15.8795	+	GI_GC	3.5881	0.00163282	0.295558	2.13291	M0ZKR0
15.3829	15.3031	15.3973	15.2942	14.9764	14.8344	15.0138	14.9956	14.666	14.9007	14.6475	14.9422	14.6332	14.5582	14.8278	14.8612	+	GI_GC	3.68313	0.00142689	-0.389334	-2.61585	M0ZKR5
16.6443	16.5905	16.4579	16.4733	16.2461	16.2838	16.1657	16.2152	16.3493	16.3814	16.4008	16.375	16.0733	16.1723	16.1982	16.1209	+	GI_GC	3.04087	0.00395006	-0.313801	-2.06821	M0ZKS8
16.305	16.2672	16.243	16.3015	16.0476	16.141	16.1299	16.1209	16.411	16.3286	16.4063	16.3758	16.2742	16.3307	16.2524	16.2591	+	GI_GC	3.22228	0.00293542	-0.169318	-1.34595	M0ZKT9
15.2956	15.0473	15.2186	15.1326	14.8261	14.9716	14.7576	14.7413	15.5777	15.5513	15.5527	15.9884	15.6354	15.2474	15.2646	15.2965	+	GI_GC	2.45767	0.0104543	-0.349382	-1.99581	M0ZKU5
18.9554	18.9512	18.8753	18.9345	18.6973	18.6993	18.7234	18.6952	18.7919	18.8182	18.8334	18.814	18.7116	18.6826	18.6997	18.721	+	GI_GC	4.57873	0.000426712	-0.225291	-1.88302	M0ZKX1
16.5883	16.4887	16.48	16.4993	16.8523	16.7381	16.6066	16.6646	16.1861	16.0192	16.1605	16.2005	16.4016	16.5115	16.439	16.5197	+	GI_GC	1.85827	0.0314604	0.201335	1.26956	M0ZKX2
16.0194	16.047	16.0332	15.8699	16.6635	16.4842	16.4277	16.5976	16.1957	16.1691	16.2036	16.1153	16.3641	16.4704	16.4426	16.4632	+	GI_GC	3.74063	0.00130019	0.55087	3.28934	M0ZL28
18.1894	18.1876	18.147	18.1562	17.8271	17.8106	17.8985	17.8235	18.0047	18.0226	18.0379	18.0434	17.8611	17.811	17.8342	17.7935	+	GI_GC	5.19047	0.000249478	-0.330102	-2.69269	M0ZL57
16.156	16.2671	16.2218	16.2053	15.7921	15.9598	15.7495	15.6734	15.8968	15.9787	15.9298	16.0823	15.8807	15.6607	15.7645	15.6538	+	GI_GC	3.18763	0.00312758	-0.418811	-2.54176	M0ZL78
16.0291	16.0065	16.0325	16.0127	16.2927	16.2209	16.1892	16.2025	16.0794	15.9967	16.017	16.0444	15.9627	15.8897	15.9664	15.9441	+	GI_GC	3.8729	0.00108706	0.206131	1.66358	M0ZLC3
15.7011	15.7286	15.5225	15.5855	15.2067	15.4319	15.4074	15.3118	15.2991	15.655	15.5141	15.3954	15.1561	15.284	15.3877	15.4903	+	GI_GC	2.23541	0.0157827	-0.295004	-1.72941	M0ZLC9
15.4546	15.5443	15.4357	15.4889	15.6978	15.7839	15.7843	15.6896	15.1955	15.379	15.301	15.2272	15.203	14.9902	15.3316	15.2439	+	GI_GC	3.47045	0.00193594	0.258004	1.90588	M0ZLM0
16.3379	16.3798	16.372	16.3486	16.4235	16.4051	16.4188	16.4237	15.8625	15.8981	15.8484	15.9033	15.9976	15.8876	15.899	15.9154	+	GI_GC	2.79002	0.00597844	0.0582132	0.525741	M0ZLN7
17.1249	17.2391	17.1108	16.9803	16.4053	16.3613	16.2512	16.4692	16.6539	16.3324	16.4929	16.5215	16.1178	16.0344	12.7617	15.8409	+	GI_GC	4.37921	0.000525773	-0.742022	-4.36286	M0ZLU9
16.7408	16.8261	16.7134	16.6444	16.9647	16.8633	16.8688	16.9592	16.4809	16.4519	16.3729	16.3222	16.4053	16.3063	16.142	16.3322	+	GI_GC	2.10435	0.0199328	0.182832	1.24611	M0ZLX3
14.4203	14.3372	14.4291	14.442	14.6184	14.5444	14.6445	14.7227	14.8964	15.1313	14.9479	14.9501	14.8705	15.1371	14.8788	14.9113	+	GI_GC	2.67381	0.00712393	0.225354	1.56741	M0ZM13
16.8337	16.9475	16.7867	16.8103	16.6118	16.6753	16.6972	16.6762	16.5587	16.5301	16.55	16.4922	16.4476	16.3439	16.5218	16.4554	+	GI_GC	2.37283	0.0122817	-0.179439	-1.28039	M0ZM21
15.9352	15.9204	15.9439	15.9458	15.7581	15.8024	15.7999	15.7873	15.4937	15.4722	15.5421	15.4939	15.2525	15.2967	15.1762	15.2321	+	GI_GC	4.85198	0.000305062	-0.149395	-1.33764	M0ZM32
16.0648	16.1104	15.9772	15.9985	16.7141	16.5257	16.5629	16.4985	14.2978	14.495	14.1447	14.1163	14.333	14.3614	14.4798	14.3632	+	GI_GC	4.09281	0.000801291	0.537614	3.42432	M0ZMA9
17.3224	17.4062	17.1266	17.2033	16.43	16.6185	16.5925	16.565	16.8324	16.8189	16.9158	16.8553	16.6308	16.3772	16.5583	16.5651	+	GI_GC	4.11676	0.00076974	-0.71313	-4.07794	M0ZMB0
16.8397	16.897	16.7951	16.7735	16.2959	16.2599	16.2717	16.3092	16.2379	16.1045	16.2361	16.2924	16.0226	15.9101	15.9088	15.9608	+	GI_GC	5.77686	0.000149571	-0.542164	-4.18668	M0ZMF8
15.6089	15.6387	15.6457	15.6294	16.7432	16.5512	16.5447	16.5668	14.504	14.3786	14.34	14.3784	14.1014	14.208	14.376	14.0432	+	GI_GC	6.01522	0.000120437	0.970811	6.55338	M0ZMG2
15.0119	15.1034	15.2008	15.067	15.8559	15.6695	15.5938	15.7217	15.2573	15.3427	15.2504	15.2059	15.5021	15.5757	15.5192	15.5573	+	GI_GC	3.98655	0.000939584	0.614465	3.65693	M0ZMP4
15.8381	15.9372	15.9445	15.8549	15.9515	16.0632	15.9877	16.0675	16.0987	16.1087	16.1194	16.2036	16.1363	16.1884	16.204	16.175	+	GI_GC	1.68557	0.0427994	0.123772	0.886042	M0ZMR2
17.2028	17.1846	17.1423	17.1194	17.4324	17.4786	17.4604	17.5038	16.3016	16.72	16.378	16.5741	16.5666	16.8851	16.6363	16.7414	+	GI_GC	4.81843	0.000316742	0.306545	2.46621	M0ZMR9
18.6535	18.6535	18.6182	18.5874	18.4582	18.4155	18.511	18.4785	18.5055	18.5632	18.4888	18.4555	18.4194	18.4021	18.4809	18.4579	+	GI_GC	3.14727	0.00335351	-0.162385	-1.29333	M0ZMS6
16.455	16.4569	16.3789	16.346	16.177	16.1702	16.2583	16.241	16.0665	16.1668	16.1861	16.1442	15.7639	15.9502	15.8581	15.8619	+	GI_GC	2.83702	0.00555719	-0.197603	-1.45673	M0ZMV9
16.9468	17.0045	17.0049	16.9957	17.1111	17.1521	17.1536	17.1775	16.8063	16.7954	16.7654	16.6709	16.7186	16.6682	16.7344	16.5701	+	GI_GC	3.75494	0.00127303	0.160654	1.3437	M0ZMW1
16.0058	16.0793	16.0873	15.9767	16.1839	16.1418	16.1507	16.1296	15.6759	15.7494	15.5278	15.6543	15.7013	15.7907	15.7473	15.7823	+	GI_GC	2.07275	0.0210377	0.114221	0.880887	M0ZMY2
14.2922	14.1978	14.2786	14.2776	14.4073	14.4599	14.4562	14.4917	13.7439	14.0892	13.8449	13.9959	13.9418	14.03	14.0406	14.0256	+	GI_GC	3.35303	0.00236308	0.192221	1.5053	M0ZMY4
14.2324	14.2415	14.1352	14.215	14.0575	13.8704	13.9717	14.0697	13.8617	14.204	14.1336	14.0933	13.8705	13.7894	13.7757	13.8245	+	GI_GC	2.19811	0.0169137	-0.213711	-1.40517	M0ZMZ6
15.705	15.6235	15.6216	15.6952	15.829	15.8171	15.7564	15.7651	15.7408	15.6146	15.6766	15.7012	15.7602	15.7437	15.7035	15.7461	+	GI_GC	2.39251	0.0119057	0.13057	1.01267	M0ZN23
14.9762	14.9762	14.903	14.9324	15.1534	15.1216	15.0262	15.1464	15.0729	15.0622	15.1337	15.0255	15.0214	14.909	15.0824	15.0561	+	GI_GC	2.51962	0.00938051	0.164953	1.22718	M0ZN84
17.9777	17.7909	17.8307	17.9259	17.7485	17.7173	17.7563	17.6817	17.729	17.7761	17.7191	17.8439	17.8203	17.7031	17.7412	17.7604	+	GI_GC	1.82357	0.0335034	-0.155354	-1.06351	M0ZN89
17.0097	16.973	16.9476	16.9466	16.4253	16.3998	16.4234	16.5237	16.5654	16.4171	16.5874	16.5586	16.2629	16.3124	16.3341	16.1869	+	GI_GC	5.55396	0.000173349	-0.526182	-4.00963	M0ZND0
14.7397	14.8146	14.7822	14.7132	15.6154	15.3501	15.3915	15.5434	15.6964	15.5266	15.6404	15.5977	15.9912	15.9575	16.0974	15.9722	+	GI_GC	4.41049	0.000505946	0.712641	4.28109	M0ZNL5
15.255	15.265	15.3018	15.265	15.4047	15.4203	15.4105	15.3897	14.9545	14.8042	14.9588	15.0152	15.1019	15.1051	15.017	15.0014	+	GI_GC	4.49348	0.00047076	0.134599	1.20025	M0ZP01
16.3892	16.4788	16.3993	16.2066	16.1539	15.6312	15.7903	15.7731	16.0568	15.9891	15.9367	15.9537	15.6627	15.6858	15.9082	15.9381	+	GI_GC	2.26256	0.0150164	-0.531355	-2.35703	M0ZP31
16.3659	16.5058	16.4422	16.3107	16.9948	16.7567	16.6065	16.5538	15.3324	15.7295	15.7856	15.1765	15.3917	15.2617	15.0956	15.5145	+	GI_GC	1.61331	0.0489583	0.321797	1.54955	M0ZP38
16.5993	16.7161	16.7762	16.6889	17.0494	17.0492	17.0108	17.1548	16.9181	16.9027	16.8652	16.7985	16.7663	16.7241	16.7786	16.692	+	GI_GC	3.60504	0.00158917	0.370879	2.50495	M0ZPA4
14.5724	14.7583	14.6845	14.6499	15.2696	15.1859	15.1482	15.1394	15.4969	15.3747	15.3611	15.318	15.9098	15.9259	15.8791	15.9646	+	GI_GC	4.39727	0.000514059	0.519482	3.49336	M0ZPB6
15.6826	15.6477	15.6398	15.6143	15.9861	15.9114	16.0121	15.9855	15.7912	15.9253	15.8237	15.7915	15.9273	15.8538	15.7939	15.8236	+	GI_GC	4.8265	0.000313363	0.327666	2.60281	M0ZPC7
14.0583	14.3549	14.2209	14.2376	14.3829	14.5054	14.5036	14.4297	13.6173	14.0309	13.5825	12.6137	14.0591	12.737	13.8642	13.7469	+	GI_GC	1.88956	0.0296706	0.237457	1.41402	M0ZPG5
18.3434	18.3476	18.3472	18.3296	18.2628	18.2986	18.3165	18.265	18.1787	18.3524	18.185	18.1863	18.1896	18.2537	18.2364	18.1898	+	GI_GC	2.1847	0.0172883	-0.0562139	-0.493999	M0ZPZ4
15.9076	16.1107	16.0835	15.9326	16.6217	16.3873	16.54	16.536	14.6706	14.8873	14.577	14.6709	15.2049	15.1616	15.0091	15.1813	+	GI_GC	3.44437	0.00202023	0.512663	2.99691	M0ZQ21
14.7885	14.7253	14.9835	14.8409	16.4255	16.0883	16.2141	16.2294	15.0759	14.2095	14.9637	15.131	15.7745	15.9891	15.8339	15.8269	+	GI_GC	5.39488	0.000195483	1.40474	7.44319	M0ZQ25
16.6317	16.6525	16.5868	16.6415	16.572	16.5551	16.5317	16.5163	16.8238	16.8188	16.8541	16.8501	16.8703	16.8275	16.8384	16.8753	+	GI_GC	2.36211	0.0125072	-0.0843477	-0.708994	M0ZQ61
18.399	18.4325	18.3964	18.3679	18.245	18.2054	18.2145	18.2083	18.1549	18.1756	18.1197	18.1365	18.0522	18.028	18.0552	18.0677	+	GI_GC	4.53162	0.000453063	-0.180652	-1.55667	M0ZQN1
15.3047	15.4359	15.4092	15.3369	15.7841	15.7435	15.7298	15.7531	16.1317	16.0543	16.0861	16.0553	16.1995	16.1563	16.2411	16.2635	+	GI_GC	4.61999	0.000410427	0.380956	2.87137	M0ZQP4
18.065	17.9822	17.9332	17.9503	17.5854	17.5668	17.5885	17.6114	17.7316	17.6575	17.7222	17.7353	17.4923	17.5046	17.5034	17.4509	+	GI_GC	4.87057	0.000305062	-0.394655	-3.02087	M0ZQW3
17.0173	16.9901	17.0963	17.0547	17.3595	17.3164	17.3178	17.3002	16.7033	16.6343	16.7192	16.7143	17.109	17.2141	17.1099	17.1006	+	GI_GC	4.42346	0.00049835	0.283875	2.24696	M0ZQY1
16.0392	15.9955	15.9924	16.0592	15.8644	15.8699	15.8731	15.8881	15.9845	15.9923	16.0425	16.0072	15.7971	15.7923	15.7796	15.768	+	GI_GC	3.85795	0.00111834	-0.147689	-1.25977	M0ZR79
15.434	15.2841	15.5065	15.4385	15.6248	15.574	15.5973	15.5239	15.1544	15.2756	15.1731	15.1154	15.336	15.2121	15.1662	15.2277	+	GI_GC	1.72255	0.039936	0.164237	1.08366	M0ZR91
16.0336	16.0255	16.0776	15.9912	16.2594	16.2156	16.1614	16.2026	15.9666	15.9045	15.8445	15.8853	15.996	15.939	15.9546	15.9738	+	GI_GC	3.23895	0.00284056	0.177782	1.40102	M0ZRE9
17.6052	17.5805	17.5021	17.5391	17.2952	17.3089	17.3203	17.2464	17.3426	17.3992	17.4088	17.3588	17.213	17.1404	17.1661	17.2223	+	GI_GC	4.09516	0.000799933	-0.263999	-2.0631	M0ZRG6
20.6194	20.632	20.5356	20.5664	20.1794	20.2869	20.26	20.2207	20.4238	20.5115	20.4666	20.4429	20.3946	20.3342	20.2707	20.263	+	GI_GC	4.42618	0.000497708	-0.351593	-2.65183	M0ZRJ1
15.3478	15.2081	15.3043	15.2806	15.5463	15.4702	15.4291	15.553	15.4172	15.3158	15.4318	15.1921	15.339	15.5065	15.3731	15.358	+	GI_GC	2.65858	0.00731369	0.214456	1.51079	M0ZRK0
17.1471	17.128	17.1258	17.1785	17.0069	17.0522	17.0612	17.0403	17.3504	17.2556	17.3733	17.3909	17.2901	17.3372	17.2826	17.3351	+	GI_GC	3.07179	0.00378956	-0.104679	-0.89451	M0ZRM5
15.4173	15.5274	15.435	15.4148	15.2828	15.3936	15.3201	15.2091	15.209	15.3163	15.3219	15.2927	15.2374	15.0449	15.0961	15.101	+	GI_GC	1.7025	0.0415282	-0.147246	-1.00332	M0ZRN4
16.1535	16.0881	16.1252	16.1334	15.9908	15.9001	15.9645	15.9846	15.7236	15.7354	15.7615	15.7545	15.5464	15.5571	15.5551	15.5552	+	GI_GC	3.25141	0.00278587	-0.16505	-1.32214	M0ZS26
14.6984	14.7173	14.7642	14.7221	14.7867	14.8286	14.7732	14.8878	14.3108	14.2164	14.2799	14.2544	14.4999	14.4099	14.5289	14.6252	+	GI_GC	1.7288	0.0395338	0.093596	0.723996	M0ZS65
17.7246	17.7916	17.7665	17.7677	18.0312	17.9796	17.9267	17.9472	17.7987	17.8116	17.7736	17.7453	17.9635	18.0106	17.9368	17.97	+	GI_GC	3.63364	0.00154248	0.208574	1.64612	M0ZSA3
14.1305	14.1161	14.0316	13.991	14.3477	14.231	14.1677	14.3158	14.128	14.0181	13.7531	14.0393	14.1462	14.0872	14.1321	14.1274	+	GI_GC	2.02213	0.0232912	0.198234	1.29688	M0ZSB3
16.0157	16.2005	16.1127	16.0909	15.2663	15.2187	15.0217	15.3995	15.6864	15.5708	15.7917	15.512	15.0108	14.8822	15.0241	14.9776	+	GI_GC	4.26036	0.000618359	-0.878372	-4.6967	M0ZSL5
16.9202	16.9504	16.8676	16.8716	17.1478	17.1083	17.0989	17.0905	16.7567	16.8103	16.7429	16.7452	16.7525	16.683	16.6512	16.6882	+	GI_GC	3.93348	0.000988594	0.208941	1.68993	M0ZSL7
15.9494	15.962	15.9515	15.844	16.2479	16.1489	16.211	16.1954	16.0247	16.0785	16.039	16.009	16.1198	16.1114	16.1894	16.158	+	GI_GC	3.67687	0.00144016	0.274078	2.03823	M0ZSN2
16.3706	16.1837	16.1059	15.9374	15.4866	15.3671	15.3872	15.2174	16.4748	16.5864	16.4814	16.5573	15.7765	15.4458	15.6838	15.7629	+	GI_GC	3.51322	0.00183982	-0.78481	-3.81569	M0ZSN7
16.9787	17.033	16.9928	16.9493	17.0653	17.0838	17.03	17.0523	16.8526	16.869	16.8252	16.8465	16.8406	16.8023	16.8535	16.8569	+	GI_GC	1.80841	0.034325	0.0693889	0.574632	M0ZT51
14.2722	14.317	14.3877	14.35	14.0021	14.092	14.193	14.1443	14.3442	14.3845	14.3173	14.456	13.9903	14.1039	14.0861	14.0694	+	GI_GC	2.47712	0.0101269	-0.223868	-1.51618	M0ZT74
16.9517	16.9933	16.7941	16.8706	16.7676	16.4975	16.4368	16.5757	16.9611	16.7707	17.0828	17.0138	17.0196	16.6397	16.9723	16.735	+	GI_GC	2.12075	0.0193969	-0.333023	-1.80602	M0ZT87
19.4277	19.4368	19.428	19.4235	19.2469	19.3065	19.3316	19.2888	19.2076	19.2604	19.215	19.252	19.2251	19.2176	19.1753	19.2116	+	GI_GC	3.54144	0.00177734	-0.135553	-1.14838	M0ZT89
13.981	13.8277	13.9422	13.9582	14.3485	14.2895	14.3632	14.4441	14.5318	14.2866	14.5651	14.3941	14.6773	14.6211	14.5919	14.775	+	GI_GC	4.05803	0.000849155	0.434026	2.95918	M0ZTF8
14.621	14.7061	14.6671	14.6566	15.2467	15.2183	14.9279	15.1051	14.8907	14.8279	15.0718	14.6363	15.0451	15.1653	14.9256	15.0954	+	GI_GC	3.09275	0.00367876	0.461815	2.64772	M0ZTJ2
16.6838	16.6262	16.6877	16.6471	17.0282	17.0506	16.8687	16.9555	15.5357	15.2673	15.3459	15.5202	15.1599	15.083	15.2587	15.16	+	GI_GC	3.44221	0.00202549	0.314573	2.18994	M0ZTK1
14.8396	14.8827	14.881	14.87	14.7294	14.8132	14.8191	14.7854	14.992	15.122	15.1077	15.0044	15.0739	15.0849	15.0563	15.2401	+	GI_GC	1.93195	0.027553	-0.0815258	-0.663909	M0ZTV9
16.2268	16.1589	16.2034	16.27	15.9687	15.9672	16.0673	16.1627	15.9047	15.9613	15.9397	15.9693	15.6325	15.8727	15.8624	15.894	+	GI_GC	1.79734	0.0349433	-0.173282	-1.13891	M0ZTX3
15.8118	15.8168	15.7598	15.7782	16.0201	15.8675	15.9883	15.9962	15.417	15.4966	15.4139	15.3698	15.3392	15.4022	15.3874	15.3921	+	GI_GC	2.5198	0.00938051	0.176369	1.2893	M0ZU24
16.9925	16.9796	16.9054	16.9418	16.6119	16.6205	16.6471	16.6165	16.7673	16.8081	16.8168	16.7776	16.6233	16.5628	16.5747	16.6094	+	GI_GC	5.35734	0.000205182	-0.330805	-2.72932	M0ZU44
14.9523	14.8855	14.9027	14.9435	15.0282	15.0853	15.0703	15.0427	15.3297	15.3991	15.335	15.3657	15.5062	15.6352	15.3049	15.4622	+	GI_GC	3.23063	0.00289014	0.135642	1.12479	M0ZU50
15.1234	15.1821	15.0892	15.1582	15.5696	15.4972	15.4332	15.5407	15.1816	15.0496	15.0252	15.0885	15.3093	15.3134	15.0757	15.0739	+	GI_GC	4.32189	0.000566246	0.371951	2.73601	M0ZU86
15.7044	15.6833	15.5948	15.657	15.3896	15.1789	15.2361	15.3899	16.7145	16.5957	16.7096	16.6354	16.4321	16.4146	16.4982	16.5443	+	GI_GC	3.06585	0.00381573	-0.361266	-2.27349	M0ZUA7
13.2843	12.9803	12.9367	13.1495	13.7415	13.5374	13.6374	13.51	13.0322	13.281	13.1898	13.2572	12.9711	13.2204	12.345	12.5492	+	GI_GC	2.78632	0.00602134	0.518903	2.65056	M0ZUG4
17.8254	17.7463	17.7436	17.7103	17.5252	17.3922	17.4712	17.5348	17.5208	17.3381	17.3839	17.3937	17.1924	17.1279	17.2749	17.2601	+	GI_GC	3.2884	0.00261196	-0.275539	-1.95682	M0ZUN5
15.9715	16.0977	16.1019	15.9932	16.2512	16.2611	16.1214	16.1853	15.3556	15.7324	15.4055	15.3526	15.3658	15.4643	15.121	15.5843	+	GI_GC	1.8753	0.0305297	0.163658	1.11194	M0ZUR3
11.4485	11.4644	11.44	11.246	11.7356	11.8649	11.9579	11.8716	12.7749	12.8161	12.821	12.9667	12.9527	12.7801	12.7853	12.8606	+	GI_GC	3.24999	0.0027898	0.457789	2.70999	M0ZUX5
17.6116	17.6994	17.6482	17.6443	17.8112	17.7867	17.8273	17.7511	17.5197	17.561	17.4837	17.4851	17.5393	17.4848	17.5079	17.5253	+	GI_GC	2.94836	0.00460341	0.143226	1.14958	M0ZV40
16.8393	16.7797	16.8248	16.8029	17.1532	17.0531	16.9619	16.9833	16.3714	16.4339	16.3957	16.407	16.4678	16.5733	16.5467	16.5736	+	GI_GC	2.62111	0.00783577	0.226219	1.55991	M0ZV96
16.7686	16.7724	16.7144	16.6781	16.6982	16.4103	16.3823	16.5087	16.4683	16.4268	16.4688	16.5783	16.3776	16.331	16.5365	16.4093	+	GI_GC	1.68362	0.0428688	-0.23352	-1.33463	M0ZVJ6
16.1088	15.911	16.1193	16.096	15.6977	15.8141	15.559	15.8966	15.8959	15.6762	15.4588	15.8004	15.887	15.9763	15.7852	15.8787	+	GI_GC	1.9347	0.0274031	-0.316899	-1.68132	M0ZVP6
19.0614	19.1378	19.0906	19.0778	18.9932	18.9843	18.9889	18.9595	18.9916	18.9637	18.9649	18.9605	19.0446	18.9824	19.0576	19.0767	+	GI_GC	3.05764	0.00385055	-0.110427	-0.935271	M0ZVR1
16.001	16.0368	16.0022	16.0241	15.9866	15.9227	15.9613	15.9482	15.9956	15.9135	15.998	16.0186	15.9647	15.9925	15.972	15.9598	+	GI_GC	2.07381	0.0210058	-0.0613413	-0.529155	M0ZVT8
14.0094	13.9126	13.9684	13.8182	13.8505	13.7518	13.7233	13.6425	14.4499	14.3147	14.4103	14.4433	14.4552	14.5003	14.4152	14.3791	+	GI_GC	1.67774	0.0433516	-0.185117	-1.15964	M0ZVV5
13.5902	13.4624	13.844	13.4904	14.1155	14.204	14.0705	14.1072	14.8576	15.1696	14.8974	15.1693	16.0076	15.7687	15.8075	15.9098	+	GI_GC	2.9287	0.00478724	0.527532	2.75675	M0ZW28
15.1208	15.4402	15.2991	14.9139	15.9531	15.8736	15.8459	16.1427	14.3907	13.4597	13.9836	13.6737	13.6028	13.9083	13.7183	13.9591	+	GI_GC	2.92235	0.00483568	0.760346	3.27664	M0ZW73
16.4593	16.234	16.4222	16.2545	15.9267	15.9175	16.0235	16.0018	15.9514	16.0483	15.781	15.9928	15.6451	15.8629	15.9446	15.8571	+	GI_GC	2.9898	0.00431665	-0.375098	-2.29795	M0ZW90
17.1159	17.0654	16.9498	16.9808	16.8633	16.9097	16.8519	16.826	16.6797	16.7752	16.7306	16.6914	16.384	16.285	16.2803	16.2857	+	GI_GC	2.11581	0.0195622	-0.16525	-1.16387	M0ZWA9
17.0519	17.0444	17.0907	17.0397	17.1407	17.1374	17.2411	17.2161	17.0241	17.0835	17.0407	17.1015	17.1653	17.2117	17.1454	17.1421	+	GI_GC	2.34651	0.0128656	0.127145	0.987084	M0ZWB1
17.718	17.7412	17.6747	17.6549	17.2599	17.305	17.3097	17.2844	17.2908	17.2876	17.3264	17.3383	17.0723	17.0629	17.1079	17.1444	+	GI_GC	5.71096	0.000152311	-0.407444	-3.31945	M0ZWB6
15.6046	15.5565	15.6375	15.6548	16.295	16.1777	16.24	16.2669	16.1767	16.0975	16.17	16.2127	16.2085	16.3083	16.2167	16.2604	+	GI_GC	5.87322	0.000137454	0.631582	4.7453	M0ZWD8
17.0769	16.8835	16.9741	17.0534	17.1729	17.2522	17.1472	17.1653	16.6767	16.9389	16.7678	16.9975	17.0184	17.1024	17.0517	17.0019	+	GI_GC	2.03856	0.02253	0.187392	1.25314	M0ZWJ3
14.5449	14.4202	14.5169	14.4694	14.0688	14.3837	14.2149	14.3462	14.2748	14.2497	14.4401	14.4494	14.053	14.1727	14.0544	14.0338	+	GI_GC	1.65625	0.0450292	-0.234442	-1.32846	M0ZWL6
15.2177	15.1092	15.1958	15.2351	15.4618	15.4047	15.4297	15.4574	15.3926	15.377	15.4191	15.4129	15.3021	15.3458	15.2584	15.3179	+	GI_GC	3.70558	0.0013727	0.248953	1.9013	M0ZWP5
15.804	15.7585	15.7877	15.789	15.9854	15.8558	15.8621	15.9368	16.0099	15.8846	15.9645	16.0222	16.0439	16.0475	15.996	16.0569	+	GI_GC	2.0716	0.0210541	0.125239	0.944866	M0ZWY7
15.486	15.4307	15.464	15.3892	15.9028	15.7474	15.7392	15.807	15.2251	15.031	15.1604	14.942	15.0919	15.1491	14.8291	15.1326	+	GI_GC	3.76684	0.00125778	0.356617	2.4902	M0ZWZ8
16.903	16.9584	16.9624	16.9924	17.6271	17.5963	17.5438	17.6644	16.5349	16.4873	16.4631	16.6479	16.5358	16.5419	16.5605	16.5121	+	GI_GC	6.0824	0.000116341	0.65385	4.96897	M0ZXE1
16.0159	16.0243	16.0218	15.9892	16.9248	16.6903	16.6945	16.8092	15.4591	15.4257	15.4317	15.4997	15.4156	15.6338	15.4936	15.5547	+	GI_GC	5.0146	0.000292528	0.76687	4.90801	M0ZXE4
16.7641	16.7865	16.8443	16.8104	17.12	17.1917	17.2081	17.1573	16.8653	16.8197	16.8959	16.8094	16.9035	16.9268	16.8086	16.9389	+	GI_GC	5.10726	0.000270765	0.367963	2.91985	M0ZXR4
15.5947	15.6323	15.6125	15.5631	15.8762	15.8416	15.6307	15.7383	15.9432	15.9018	15.8033	15.7826	15.9358	15.7445	15.9804	16.0375	+	GI_GC	1.61159	0.0490429	0.171044	1.08745	M0ZXS8
15.5114	15.622	15.4055	15.489	15.055	14.9005	15.0226	15.0814	15.1082	15.1586	15.1892	15.0844	14.9881	14.9075	14.8506	15.141	+	GI_GC	3.75615	0.00127303	-0.492083	-3.07772	M0ZXX6
14.633	14.738	14.6107	14.6499	14.9779	14.978	14.8683	14.8753	14.6173	14.7556	14.6875	14.7726	14.6722	14.7212	14.7431	14.5907	+	GI_GC	3.17731	0.00318556	0.266973	1.88709	M0ZY03
16.0654	16.0394	16.1034	16.0531	16.2725	16.1726	16.2781	16.2886	16.2369	16.1797	16.2228	16.281	16.4456	16.4695	16.411	16.4131	+	GI_GC	3.08937	0.00368233	0.187665	1.4404	M0ZY56
15.186	15.3351	15.1634	15.2909	15.5958	15.5495	15.62	15.43	15.4047	15.3794	15.3652	15.3759	15.4393	15.4479	15.4329	15.3771	+	GI_GC	2.68337	0.00703089	0.304984	1.91833	M0ZY73
17.9592	17.9448	17.8638	17.9107	17.5812	17.6206	17.6232	17.5892	17.7429	17.7181	17.7606	17.7675	17.5788	17.4912	17.5107	17.5211	+	GI_GC	4.95038	0.000293512	-0.316072	-2.55353	M0ZY84
17.588	17.5703	17.5729	17.5518	17.4492	17.4224	17.4077	17.4772	17.3584	17.321	17.3411	17.3568	17.1678	17.2876	17.2392	17.1392	+	GI_GC	3.60988	0.0015796	-0.131625	-1.12479	M0ZY89
15.7997	15.8003	15.7658	15.7294	16.265	16.2041	16.197	16.2539	15.3777	15.5391	15.4505	15.4249	15.3276	15.3539	15.3157	15.323	+	GI_GC	5.85394	0.000138371	0.45615	3.67616	M0ZYC1
15.9082	15.9281	15.7906	15.8603	15.6724	15.6179	15.7363	15.6737	15.9141	15.9932	15.9938	16.0638	15.7137	15.7194	15.6824	15.6199	+	GI_GC	2.62978	0.00773078	-0.196723	-1.41533	M0ZYC4
15.5295	15.6172	15.4818	15.4875	15.2362	15.3799	15.2327	15.2406	14.9949	14.882	15.07	15.0761	14.5938	14.694	14.7073	14.6644	+	GI_GC	2.7754	0.00611224	-0.25662	-1.73866	M0ZYC7
15.5922	15.4952	15.584	15.5723	15.6549	15.7364	15.6218	15.6544	15.3985	15.2732	15.326	15.2651	15.4735	15.5022	15.3846	15.3486	+	GI_GC	1.73273	0.0393213	0.105936	0.796135	M0ZYF3
15.0014	14.7944	14.9887	15.1797	15.4589	15.3292	15.9724	15.4407	15.5309	15.8703	15.5766	15.6237	15.4352	15.508	15.3489	15.5764	+	GI_GC	1.84657	0.0320942	0.559226	2.1201	M0ZYR0
14.6807	14.5179	14.624	14.5882	14.848	14.7779	14.7778	14.7873	14.7829	14.6409	14.7261	14.7356	14.8229	14.7503	14.8169	14.8447	+	GI_GC	2.6654	0.00723588	0.195085	1.41324	M0ZYT1
15.5351	15.5043	15.5744	15.4075	16.0558	16.0703	16.0227	16.0331	14.5254	14.4291	14.5635	14.5528	14.5194	14.5951	14.6595	14.5323	+	GI_GC	5.17278	0.000252529	0.540135	3.93614	M0ZYT4
15.7634	15.6585	15.6616	15.7386	15.49	15.482	15.377	15.4522	15.3239	15.2286	15.3566	15.4537	14.9652	14.903	14.9115	14.9066	+	GI_GC	3.33055	0.00244952	-0.255262	-1.86142	M0ZZ66
17.9638	17.9204	17.8799	17.9068	17.6626	17.6121	17.7079	17.6317	17.7778	17.8748	17.7728	17.6988	17.6743	17.6344	17.7496	17.6583	+	GI_GC	4.15921	0.000712686	-0.26414	-2.07559	M0ZZE2
14.9502	14.8747	14.9142	14.9669	15.3579	15.2737	15.3331	15.4135	14.741	14.5489	14.6164	14.6152	14.7548	14.6636	14.7236	14.7761	+	GI_GC	4.64583	0.000396892	0.418057	3.08555	M0ZZL1
16.4606	16.502	16.6133	16.4659	16.0882	16.1258	16.054	16.1436	15.7421	15.6956	15.7998	15.8745	15.5505	15.7189	15.602	15.7317	+	GI_GC	4.23833	0.00063709	-0.40752	-2.8957	M0ZZL3
17.5566	17.4398	17.39	17.4983	17.1537	17.0892	17.1082	17.1897	16.8086	16.7031	16.8059	16.7884	16.3422	16.3335	16.2886	16.355	+	GI_GC	3.6578	0.001482	-0.335945	-2.3561	M0ZZV7
17.5826	17.6566	17.5802	17.5888	17.9732	17.8778	17.9404	17.9286	17.3835	17.421	17.3766	17.3624	17.5813	17.5987	17.5685	17.5182	+	GI_GC	4.72834	0.000356356	0.327925	2.58333	M1A028
14.0392	14.1667	14.0294	14.1571	14.5701	14.4667	14.4359	14.3829	14.7952	14.866	14.8665	14.8147	15.1961	15.2194	15.1392	15.0943	+	GI_GC	3.29538	0.0025801	0.365793	2.37504	M1A065
19.3948	19.3429	19.3599	19.4022	19.2501	19.2922	19.3215	19.2945	19.537	19.5113	19.5518	19.5398	19.516	19.527	19.4544	19.5192	+	GI_GC	2.23517	0.0157827	-0.0853415	-0.708695	M1A0A3
13.4645	13.4321	13.4818	13.4188	13.367	13.0312	13.1098	13.2493	13.1587	13.1897	13.1732	13.146	13.3199	12.7556	13.2089	13.273	+	GI_GC	1.85393	0.0316618	-0.260003	-1.47866	M1A0A9
15.7202	15.6442	15.6254	15.6481	15.1468	15.1318	15.2697	15.1958	15.3727	15.3587	15.3531	15.4364	15.2027	15.1489	15.2363	15.1908	+	GI_GC	4.8278	0.000313363	-0.473411	-3.44585	M1A0E2
15.4335	15.3908	15.3277	15.3795	15.0557	15.1266	15.0939	15.1742	14.7525	14.6286	14.7023	14.8664	14.5808	14.6483	14.6249	14.8724	+	GI_GC	3.73041	0.00131668	-0.270261	-2.02834	M1A0K1
16.6779	16.5976	16.4279	16.5268	16.4032	16.1132	16.2766	16.0792	16.0671	16.0186	16.2089	16.0729	16.1085	16.0483	16.0232	15.8836	+	GI_GC	1.98896	0.0247922	-0.339531	-1.76734	M1A0N1
17.5878	17.5683	17.5846	17.5965	17.5025	17.4737	17.558	17.5276	17.3872	17.3682	17.4194	17.394	17.358	17.3533	17.3437	17.3187	+	GI_GC	1.96714	0.0256576	-0.068881	-0.579301	M1A0N5
14.9129	14.7414	14.9873	14.9388	15.309	15.1351	15.1328	15.4004	13.8164	13.3098	13.7249	13.9385	12.9203	13.0566	12.9422	13.0053	+	GI_GC	2.19441	0.01703	0.349233	1.88492	M1A0V3
15.1137	15.0931	15.0886	15.0938	15.2758	15.2486	15.2862	15.2767	15.3052	15.3923	15.3448	15.3199	15.3722	15.3391	15.308	15.3117	+	GI_GC	5.68731	0.000152311	0.174512	1.5889	M1A0W3
16.709	16.6871	16.6035	16.5396	16.2712	16.3623	16.3267	16.362	16.4109	16.4331	16.3903	16.5366	16.5575	16.4524	16.4859	16.4541	+	GI_GC	3.31507	0.00250395	-0.304254	-2.1048	M1A0X0
15.1405	14.84	14.7703	14.9173	14.2224	13.8167	13.806	14.4153	13.4697	13.8428	12.9309	13.844	12.6766	13.154	12.5186	12.9075	+	GI_GC	2.59431	0.00819372	-0.851941	-3.13601	M1A0X2
14.9576	14.7229	14.9503	14.8985	15.0758	15.1326	15.0848	15.2136	14.9995	14.7562	14.8596	15.0011	14.9463	15.1593	15.1678	14.9486	+	GI_GC	2.082	0.0206907	0.244417	1.49784	M1A0Z9
15.9038	15.8966	15.8771	15.9472	16.1691	16.1403	16.0806	16.1166	16.0869	16.0579	16.0739	16.1007	16.0926	16.115	16.1114	16.1594	+	GI_GC	4.04243	0.000858357	0.220453	1.77991	M1A1A0
15.4635	15.4366	15.4992	15.4899	15.9282	15.6937	15.7103	15.9416	15.0555	14.6188	14.9667	15.1123	14.7787	15.0111	14.8195	15.1576	+	GI_GC	2.62301	0.00781331	0.346178	2.05041	M1A1B1
13.7442	13.6881	13.6457	13.6214	14.1499	14.104	13.9994	14.0358	13.8434	13.9062	13.7448	13.7122	13.7757	13.9534	13.9401	13.6207	+	GI_GC	4.03224	0.000869495	0.397389	2.7754	M1A1E3
16.552	16.2816	16.1802	16.3419	15.8486	15.6242	15.6254	15.5785	16.165	15.6506	16.0295	16.046	15.8567	15.7666	15.8005	15.8421	+	GI_GC	3.28697	0.00261534	-0.669735	-3.36122	M1A1H1
15.3107	15.3633	15.8667	15.0061	16.4225	16.4203	16.0605	15.7936	15.5028	16.1903	15.9308	15.8839	16.166	15.7345	15.8703	15.5861	+	GI_GC	1.81405	0.0341074	0.787519	2.35218	M1A1K0
17.8346	17.9229	17.8348	17.7977	17.4753	17.5941	17.4765	17.4034	18.11	18.1252	18.0789	18.1322	18.1802	18.055	18.0784	18.1252	+	GI_GC	3.5569	0.00172984	-0.360178	-2.4399	M1A1S5
15.2545	15.1581	15.2954	15.2643	15.5394	15.4292	15.5163	15.4863	15.7499	15.6651	15.6687	15.6893	15.8314	15.856	15.8622	15.8275	+	GI_GC	3.22355	0.00293222	0.249751	1.80936	M1A1W0
17.1213	17.1872	17.1866	17.2475	17.2784	17.4164	17.4647	17.5058	17.1173	17.1446	17.0457	17.1979	17.29	17.2881	17.143	17.365	+	GI_GC	2.2144	0.0163895	0.230736	1.48113	M1A219
16.117	16.1646	16.2114	16.1672	15.9735	15.9309	16.0637	16.0249	16.4276	16.3872	16.4568	16.4369	16.4519	16.4557	16.4512	16.4855	+	GI_GC	2.51456	0.0094576	-0.16685	-1.23689	M1A271
16.3141	16.1879	16.2374	16.1662	16.4146	16.3369	16.4198	16.3571	16.4267	16.5012	16.4979	16.54	16.4029	16.4585	16.4115	16.3083	+	GI_GC	2.15446	0.0182994	0.155705	1.12187	M1A272
17.3294	17.3093	17.3388	17.3949	17.6037	17.6879	17.748	17.6159	17.353	17.481	17.3762	17.3787	17.3982	17.4807	17.354	17.4839	+	GI_GC	3.80208	0.0012044	0.320796	2.31945	M1A288
15.7853	15.3569	15.494	15.5722	14.6914	14.8013	14.3226	14.9769	15.1122	14.7412	14.4819	15.2122	14.1731	14.7449	14.4104	14.3783	+	GI_GC	2.68917	0.00696404	-0.854057	-3.22606	M1A299
18.1429	18.1409	18.1388	18.1131	18.0194	17.9524	18.0129	17.9952	18.2805	18.3919	18.3314	18.3411	18.2586	18.3246	18.1968	18.2225	+	GI_GC	3.79741	0.0012058	-0.138963	-1.19153	M1A2B4
14.3784	14.1733	14.0749	14.0026	13.9185	13.812	13.8599	13.9647	14.8373	14.6459	14.9168	14.7787	14.7411	14.5336	14.7178	14.5041	+	GI_GC	1.6453	0.0459673	-0.268528	-1.42712	M1A2D6
16.7564	16.7926	16.652	16.7171	16.5824	16.6507	16.5882	16.5086	16.519	16.415	16.5281	16.5001	16.611	16.5053	16.4958	16.5369	+	GI_GC	1.89937	0.0291084	-0.147036	-1.03662	M1A2J8
15.6316	15.5594	15.5042	15.5721	15.2147	15.3449	15.2764	15.4088	15.4312	15.3493	15.3428	15.4254	15.1786	15.5056	15.2897	15.2271	+	GI_GC	2.68116	0.00703089	-0.255639	-1.71007	M1A2N0
19.6641	19.5685	19.5968	19.6584	19.4926	19.4621	19.4892	19.4178	19.1543	19.2435	19.1399	19.2771	19.2405	19.2081	19.1931	19.331	+	GI_GC	2.76897	0.00614404	-0.156553	-1.21245	M1A2T5
17.2038	17.1415	17.0943	17.1423	16.7825	16.7117	16.8089	16.8974	16.3919	16.4721	16.4774	16.5968	16.2136	16.3179	16.364	16.4311	+	GI_GC	3.6206	0.00157479	-0.345334	-2.39054	M1A2V2
15.6766	15.717	15.712	15.6864	15.4478	15.5599	15.5054	15.4641	15.4828	15.4412	15.4871	15.5642	15.6564	15.6768	15.632	15.6074	+	GI_GC	3.56418	0.00170908	-0.203738	-1.60607	M1A2V5
12.1581	12.1662	12.4153	12.3888	12.7195	12.5053	12.5131	12.6301	12.6734	12.669	12.7203	12.8376	12.6951	12.6767	12.7459	12.8051	+	GI_GC	1.93979	0.027132	0.309918	1.66355	M1A2V8
15.8284	15.639	15.6791	15.7461	16.0807	15.9164	15.8689	16.046	15.7448	15.7917	15.7909	15.769	15.9729	15.9069	15.9312	15.7864	+	GI_GC	2.09237	0.0202787	0.254844	1.5396	M1A2V9
14.5421	14.4539	14.6412	14.6323	15.4152	15.3174	15.2435	15.4663	14.0293	13.9813	14.0088	14.0389	13.8977	14.0707	13.8882	13.9131	+	GI_GC	4.68078	0.000389257	0.793183	4.76663	M1A383
14.4533	14.6552	14.8531	14.6086	15.3332	15.3049	15.2274	15.2338	14.9978	14.9691	15.0187	14.7978	15.1166	15.3775	15.3414	15.3647	+	GI_GC	3.47673	0.00193581	0.632277	3.39101	M1A396
18.6444	18.8531	18.8244	18.6583	19.2533	19.2054	19.1237	19.2496	17.8499	17.7879	17.8344	17.6412	17.8615	17.9063	18.0079	18.0079	+	GI_GC	3.51601	0.00183982	0.462912	2.85288	M1A3D9
13.3754	13.6228	13.1511	13.3749	14.1218	13.9576	13.8266	13.974	12.7663	12.9114	13.5879	13.0741	13.0771	12.7538	13.1949	12.8736	+	GI_GC	2.68682	0.00699293	0.588962	2.75569	M1A3E8
16.03	16.039	15.9014	15.8144	15.1788	15.2976	15.0354	15.2019	15.7443	15.5609	15.7657	15.9466	15.3139	15.1546	15.1557	15.1665	+	GI_GC	4.24597	0.000631193	-0.767765	-4.34984	M1A423
17.5349	17.5896	17.4771	17.3971	17.3533	17.2148	17.1734	17.324	17.3592	17.1979	17.389	17.3141	17.0107	17.2348	17.1785	17.2463	+	GI_GC	2.10755	0.0198622	-0.233304	-1.4625	M1A456
15.9798	15.813	15.8371	15.8786	15.5616	15.7751	15.4071	15.5389	15.604	15.4534	15.6503	15.749	15.5386	15.4113	15.3364	15.4168	+	GI_GC	1.95571	0.0262247	-0.306445	-1.65994	M1A468
16.3545	16.4738	16.4185	16.399	16.6445	16.6777	16.7251	16.614	16.4189	16.4915	16.3661	16.3632	16.5665	16.6061	16.5908	16.5616	+	GI_GC	3.50347	0.00187274	0.253831	1.88975	M1A4G8
16.695	16.6825	16.569	16.6071	16.1085	16.1258	16.1146	16.09	16.333	16.4101	16.3815	16.4032	16.1868	16.1874	16.2978	16.1996	+	GI_GC	5.57562	0.000173349	-0.528707	-4.03239	M1A4Q9
16.3374	16.2813	16.2647	16.1899	16.1447	16.0913	16.0315	15.9059	16.5554	16.7326	16.5551	16.7795	16.8479	16.6616	16.7309	16.7891	+	GI_GC	2.03217	0.0228219	-0.224966	-1.40895	M1A4R1
15.4434	15.5626	15.4678	15.4513	15.5686	15.6058	15.5962	15.5624	15.6125	15.6588	15.6898	15.6346	15.6094	15.6126	15.6333	15.6183	+	GI_GC	1.86846	0.0308551	0.10197	0.78737	M1A4U3
18.0196	17.9854	18.0571	17.9945	18.3078	18.1557	18.1629	18.1846	17.8841	17.7675	17.8916	17.8531	17.9554	17.9096	18.0234	17.9566	+	GI_GC	2.53856	0.00907517	0.188621	1.35692	M1A4Z7
17.0208	16.9939	17.0006	17.0306	17.2707	17.1822	17.1978	17.2258	17.0554	16.9968	17.034	17.0376	17.0795	17.033	17.0258	17.0701	+	GI_GC	4.18403	0.000693291	0.207643	1.71301	M1A554
15.1943	15.1482	15.2298	15.2268	15.3611	15.4785	15.2811	15.3317	15.0008	14.8944	14.9313	14.979	15.1081	15.2368	15.0109	14.9469	+	GI_GC	1.91998	0.0280996	0.16335	1.11906	M1A587
16.3102	16.2083	16.2576	16.0443	15.7343	15.7859	15.4815	15.5608	16.6637	16.7877	16.8117	16.8624	16.6541	16.5434	16.6228	16.6945	+	GI_GC	3.07029	0.00379624	-0.564467	-2.94213	M1A5F8
16.1471	16.2302	16.1905	16.1371	16.4502	16.284	16.2768	16.3307	15.9658	15.9616	15.8367	15.8476	15.9968	16.0009	16.0118	16.1025	+	GI_GC	1.89467	0.0293658	0.159225	1.0949	M1A5G6
16.1971	16.0626	15.9372	16.0447	15.1306	15.5776	15.1067	15.1235	12.8489	12.3795	12.2373	12.1362	12.9704	11.991	12.7884	12.0161	+	GI_GC	3.21439	0.00297835	-0.825783	-3.64988	M1A5Q3
18.5294	18.5183	18.4846	18.4585	18.6174	18.5893	18.5607	18.626	18.3933	18.2598	18.3289	18.2705	18.3985	18.3248	18.4318	18.449	+	GI_GC	2.42946	0.0110811	0.100648	0.825567	M1A5X1
16.2864	16.2639	16.3207	16.2991	16.4521	16.4576	16.3674	16.4669	16.7213	16.7338	16.7223	16.7282	16.7768	16.7991	16.7791	16.6939	+	GI_GC	2.83024	0.00562853	0.143464	1.13896	M1A642
18.5239	18.6796	18.5588	18.4863	18.7853	18.8075	18.6302	18.7289	18.4477	18.2107	18.3912	18.2708	18.5053	18.4677	18.4796	18.5549	+	GI_GC	1.64993	0.0455848	0.175836	1.11591	M1A649
16.6969	16.6785	16.6391	16.7151	16.4214	16.4973	16.5	16.5046	16.5805	16.6331	16.562	16.6075	16.4926	16.5121	16.4781	16.4567	+	GI_GC	3.6483	0.00149966	-0.201613	-1.60445	M1A687
15.2316	15.1952	15.2541	15.194	15.1225	15.0994	15.1086	15.1833	14.9463	14.9926	14.919	15.0364	14.889	14.8843	15.0412	15.025	+	GI_GC	2.03408	0.0227424	-0.0902584	-0.728384	M1A690
16.1687	16.1972	16.1838	16.2131	16.0683	16.0492	16.1165	16.1114	16.4287	16.3285	16.4294	16.4329	16.3407	16.3228	16.3367	16.2904	+	GI_GC	2.81929	0.00569657	-0.104352	-0.877085	M1A6F4
15.0112	15.0974	15.0041	14.9589	15.3766	15.1873	15.1641	15.3287	14.7157	14.8233	14.7244	14.7895	14.5846	14.6466	14.8038	14.7357	+	GI_GC	2.20902	0.0165604	0.246273	1.54211	M1A6H0
16.1432	16.1272	16.1522	16.1199	16.3133	16.3146	16.3043	16.3303	16.2723	16.2595	16.2536	16.2624	16.3071	16.3214	16.3009	16.2966	+	GI_GC	5.9524	0.000129484	0.179994	1.64911	M1A6K1
14.4351	14.3202	14.5002	14.4507	14.6428	14.6243	14.648	14.669	14.6045	14.6443	14.6538	14.744	14.6914	14.6665	14.6444	14.6955	+	GI_GC	2.86157	0.00532796	0.219464	1.57706	M1A6L5
15.2728	15.328	15.137	15.0839	14.4152	14.3242	14.272	14.2612	15.4952	15.6621	15.5255	15.4826	15.5966	15.4894	15.4799	15.5505	+	GI_GC	4.94169	0.000293512	-0.887246	-5.31353	M1A6N2
17.7836	17.7471	17.7892	17.7949	17.5256	17.5753	17.5695	17.5938	17.7864	17.7179	17.7635	17.8376	17.668	17.6548	17.6493	17.6154	+	GI_GC	4.64965	0.000396023	-0.212618	-1.80151	M1A6N6
16.2808	16.3323	16.3391	16.2565	16.0532	15.8512	15.9585	16.0287	15.6892	15.5898	15.5525	15.5376	15.2627	15.0733	15.2252	15.2858	+	GI_GC	3.25387	0.00278049	-0.329255	-2.2025	M1A6Q8
15.1292	15.2174	15.0445	15.1898	15.5154	15.807	15.6582	15.7214	15.0305	14.9867	15.1599	15.084	14.9113	15.1739	14.6107	14.6641	+	GI_GC	3.47963	0.00192709	0.530252	3.0754	M1A6U3
14.4611	14.6128	14.7677	14.6854	14.8722	14.9869	14.9054	15.1018	14.3282	14.1775	14.3841	14.1551	14.5193	14.4127	14.5533	14.604	+	GI_GC	2.17054	0.017721	0.33485	1.83229	M1A713
14.9417	15.2478	15.0111	14.8455	15.3366	15.4099	15.3209	15.2679	14.9299	15.2641	15.0906	15.0932	15.241	15.1845	15.3749	15.4189	+	GI_GC	1.9217	0.0280376	0.322302	1.69081	M1A7G9
17.0286	17.0435	17.0578	17.0426	17.4363	17.3908	17.4701	17.4369	16.881	16.9766	16.866	16.9956	17.1249	17.1357	17.1473	17.2145	+	GI_GC	6.30019	0.000116341	0.390399	3.32733	M1A7Q3
13.0986	12.5208	13.1982	12.9238	14.6091	14.2424	14.0916	14.4672	14.4004	14.2167	14.6063	14.6924	15.1225	15.1019	14.8056	15.1546	+	GI_GC	3.5411	0.00177734	1.41721	4.91034	M1A7Q9
17.1046	17.1067	17.1198	17.1037	16.9844	17.0552	16.9462	16.9065	16.3184	16.1997	16.3685	16.5589	16.6079	16.3749	16.0831	16.2808	+	GI_GC	2.27077	0.0147717	-0.135592	-1.02815	M1A7U3
15.8412	15.7907	15.737	15.7657	15.6813	15.679	15.6802	15.7108	15.7435	15.7364	15.7246	15.7375	15.6518	15.5921	15.658	15.6522	+	GI_GC	2.19331	0.0170505	-0.0958271	-0.776479	M1A7X7
16.3813	16.4501	16.4511	16.4313	16.1775	16.3418	16.3342	16.1929	16.1325	16.2873	16.3149	16.2049	16.1605	16.0069	15.9102	16.1364	+	GI_GC	1.91119	0.0285754	-0.166894	-1.13387	M1A7Z6
16.6928	16.7325	16.7336	16.715	16.8356	16.8146	16.7897	16.8044	16.828	16.779	16.7919	16.7644	16.9443	16.9113	16.9245	16.9798	+	GI_GC	3.31018	0.00251767	0.0925941	0.815183	M1A7Z9
16.6145	16.5803	16.5094	16.5942	16.3655	16.2957	16.3121	16.3245	16.3184	16.2744	16.3158	16.3122	16.11	16.1535	16.0954	16.1739	+	GI_GC	4.02372	0.000880543	-0.25017	-1.96552	M1A828
16.31	16.2395	16.224	16.2163	15.9323	15.8714	15.903	15.9716	16.564	16.5761	16.5776	16.5568	16.3156	16.3331	16.3531	16.3448	+	GI_GC	4.43911	0.000491593	-0.327863	-2.5176	M1A8C3
16.91	16.8202	16.8127	16.8459	16.734	16.6271	16.5787	16.7323	16.6902	16.562	16.7201	16.6761	16.5195	16.5537	16.5783	16.6574	+	GI_GC	2.15085	0.0184161	-0.179172	-1.23807	M1A8E9
15.1539	15.1497	15.2703	15.1098	15.6543	15.4916	15.5328	15.6038	15.0395	15.088	15.1006	15.1476	15.3257	15.5146	15.4924	15.4355	+	GI_GC	3.6845	0.00142605	0.399705	2.66277	M1A8P1
15.0536	15.1875	15.3084	15.1543	15.4644	15.4495	15.4584	15.4577	15.4813	15.5402	15.5398	15.3882	15.9093	15.9413	16.0082	15.9788	+	GI_GC	2.75875	0.00622702	0.281549	1.84483	M1A8S4
16.6672	16.6433	16.5248	16.5993	16.169	16.22	16.1192	16.1757	15.9897	16.0662	16.0233	16.1233	15.5637	15.5833	15.6874	15.6695	+	GI_GC	4.62372	0.000409542	-0.437658	-3.18339	M1A920
16.3286	16.2946	16.2992	16.3323	16.4619	16.3585	16.4461	16.4119	16.5307	16.5488	16.5188	16.5097	16.5101	16.5054	16.5709	16.524	+	GI_GC	2.27254	0.0147597	0.105933	0.848245	M1A967
17.2387	17.1654	17.1745	17.2275	16.8373	16.787	16.8615	16.8823	17.0426	17.1018	17.1049	17.0863	16.8168	16.9363	16.8681	16.8665	+	GI_GC	4.89795	0.000305062	-0.359529	-2.8173	M1A989
16.4555	16.543	16.493	16.547	16.7932	16.7958	16.8479	16.779	16.396	16.5103	16.4223	16.4519	16.5247	16.6211	16.4618	16.5169	+	GI_GC	4.49464	0.00047076	0.294373	2.32625	M1A9C1
16.3893	16.4064	16.3538	16.3709	16.5167	16.6421	16.569	16.4864	16.3501	16.5086	16.371	16.3502	16.5757	16.4826	16.4801	16.475	+	GI_GC	2.53409	0.00912622	0.173442	1.27585	M1A9K6
16.5448	16.5363	16.6318	16.5618	16.348	16.3605	16.2811	16.4052	16.6912	16.6631	16.7212	16.7176	16.5154	16.4456	16.5856	16.5328	+	GI_GC	3.21593	0.00297319	-0.219985	-1.64647	M1A9T7
16.9645	17.1628	17.039	16.942	16.5425	16.744	16.6317	16.483	16.8065	16.876	16.8212	16.8041	16.6851	16.3175	16.5982	16.6208	+	GI_GC	2.88018	0.00514926	-0.426811	-2.43159	M1A9U0
17.1287	17.1496	17.1195	17.14	17.222	17.2404	17.1713	17.2449	16.3872	16.3883	16.4296	16.4609	16.4003	16.3732	16.3518	16.325	+	GI_GC	2.48213	0.0100522	0.0851903	0.721397	M1A9Z4
19.2807	19.2784	19.2009	19.1644	18.7658	18.8204	18.7313	18.7588	18.9485	19.0517	18.9281	18.8865	18.7203	18.6772	18.7029	18.6909	+	GI_GC	4.97396	0.000292528	-0.462032	-3.43679	M1AA49
15.1672	15.1468	15.18	15.1823	15.2587	15.3681	15.2445	15.2343	15.4544	15.6407	15.498	15.551	15.585	15.575	15.6133	15.5537	+	GI_GC	1.81294	0.0341592	0.107355	0.81312	M1AA65
16.5753	16.4537	16.3857	16.5262	16.1373	15.9195	15.9688	15.9336	15.9197	15.8207	15.8152	15.8441	15.867	15.5657	15.7252	15.8239	+	GI_GC	3.56806	0.00169784	-0.495406	-2.99894	M1AA76
14.0046	14.0958	14.375	14.3791	14.821	14.5111	14.556	14.5707	15.1713	14.9709	15.1834	15.2335	15.6223	15.6839	15.5982	15.6281	+	GI_GC	1.82425	0.0335034	0.401097	1.83219	M1AA93
14.9863	14.777	14.9805	14.8026	14.2863	14.454	14.4373	14.5845	14.3553	14.3035	14.3845	14.4725	13.7151	13.7575	13.3731	13.4935	+	GI_GC	2.76995	0.00614404	-0.446043	-2.43827	M1AAA0
18.4359	18.5145	18.4102	18.4461	18.2838	18.3754	18.3479	18.3007	17.8818	18.0055	17.9458	17.9601	17.8838	17.8541	17.8334	17.8166	+	GI_GC	2.18122	0.0173759	-0.124786	-0.95495	M1AAI6
16.8852	16.9339	16.9217	16.9278	16.8209	16.8368	16.8159	16.796	16.6668	16.6159	16.6286	16.63	16.6698	16.5864	16.6352	16.6127	+	GI_GC	3.45086	0.0020024	-0.0997744	-0.876809	M1AAL2
16.441	16.445	16.4239	16.4638	16.526	16.6678	16.5595	16.5454	16.9588	16.8406	17.0655	17.0496	17.1066	17.0423	17.0507	16.9852	+	GI_GC	2.14714	0.0185169	0.131271	0.988299	M1AAR1
16.1262	16.0183	16.1796	16.1039	16.3204	16.2485	16.169	16.2359	16.5054	16.3685	16.5901	16.6103	16.7845	16.6524	16.5838	16.6739	+	GI_GC	1.61176	0.0490429	0.136464	0.936597	M1AAS0
14.8969	14.8753	14.8695	14.877	14.1434	14.1425	14.3769	14.4099	14.1663	14.1399	14.1637	14.2749	13.3905	13.4833	13.5852	13.5119	+	GI_GC	3.80752	0.00119873	-0.611513	-3.53764	M1AAS7
15.8157	15.8766	15.8136	15.7955	15.9563	15.9597	15.9078	15.9162	15.5599	15.7619	15.6016	15.6877	15.7189	15.6947	15.8035	15.7647	+	GI_GC	2.58689	0.00826524	0.10965	0.897519	M1AB35
13.5007	13.5103	13.5364	13.5959	13.7854	13.7234	13.5765	13.7584	13.933	13.9231	13.9093	14.0689	14.0057	14.1023	14.1588	14.1614	+	GI_GC	1.84811	0.0320075	0.175139	1.15797	M1AB59
16.6563	16.5591	16.4168	16.5372	16.3275	16.341	16.2314	16.1806	14.6336	14.5323	14.539	14.8008	14.6027	14.1224	14.0754	14.2676	+	GI_GC	2.31945	0.0134783	-0.272235	-1.6753	M1ABD4
15.2204	15.1649	15.2568	15.2258	14.882	14.8623	15.0325	14.8079	14.6791	14.6813	14.7843	14.9174	14.5399	14.7879	14.767	14.6015	+	GI_GC	3.09067	0.00368046	-0.320805	-2.11413	M1ABE1
14.4069	14.4347	14.3617	14.3501	14.7651	14.6513	14.5476	14.6611	14.8914	14.8682	14.8415	14.8804	14.9912	14.8317	14.898	14.988	+	GI_GC	2.82462	0.00566947	0.267941	1.80301	M1ABF8
16.7165	16.7378	16.646	16.7295	16.4534	16.5586	16.4493	16.4608	16.5332	16.4563	16.5496	16.5152	16.3254	16.4448	16.1587	16.2744	+	GI_GC	3.29627	0.00257975	-0.226918	-1.69981	M1ABN2
13.4122	13.123	13.2864	13.2548	13.6408	13.4421	13.5012	13.675	13.6311	13.457	13.692	13.5105	13.4979	13.52	13.5855	13.5142	+	GI_GC	1.96316	0.0258245	0.295657	1.63066	M1ABX1
16.2766	16.1978	16.2522	16.2399	16.0404	16.0075	16.0112	16.0651	16.1976	16.1016	16.2389	16.2289	15.9976	15.9772	15.9326	15.934	+	GI_GC	4.20839	0.000668745	-0.210551	-1.73577	M1AC15
19.0919	19.1004	19.103	19.0794	18.8856	18.8711	18.8809	18.784	19.0669	19.1116	19.1268	19.0965	19.0675	19.027	19.1143	19.0659	+	GI_GC	4.16169	0.000712686	-0.238293	-1.91295	M1AC27
15.5121	15.467	15.5174	15.5819	15.3564	15.381	15.3456	15.4552	15.8349	15.7782	15.806	15.833	15.7573	15.8217	15.7677	15.7749	+	GI_GC	2.12334	0.0193187	-0.135041	-1.00644	M1AC83
15.9056	16.0279	16.0728	15.9541	16.2725	16.1881	16.2739	16.2487	16.19	16.1107	16.1617	16.2155	16.0027	16.1592	15.981	16.0065	+	GI_GC	3.02936	0.00401052	0.255728	1.79627	M1ACG4
15.9341	15.9016	15.8686	15.828	15.5828	15.724	15.6772	15.7127	15.6668	15.689	15.7197	15.6367	15.4101	15.4031	15.4039	15.416	+	GI_GC	2.74529	0.00637187	-0.208921	-1.49999	M1ACI6
14.0503	14.0277	14.2521	13.9073	14.4413	14.3067	14.2586	14.4141	13.7884	13.8255	13.7041	13.87	13.7472	13.8985	13.6894	13.7881	+	GI_GC	1.91167	0.0285754	0.295842	1.61108	M1ACL9
16.3522	16.386	16.2232	16.2536	16.0659	16.1654	16.105	16.0929	16.3869	16.4414	16.4543	16.4312	16.3838	16.3545	16.3481	16.3661	+	GI_GC	2.36227	0.0125072	-0.196487	-1.36277	M1ACM1
16.1335	16.0959	16.138	16.1269	16.3704	16.3001	16.2786	16.3158	16.1885	16.221	16.166	16.2573	16.2937	16.2873	16.306	16.3051	+	GI_GC	3.93472	0.000988594	0.192625	1.58172	M1ACT7
13.9336	13.9385	14.3591	13.7264	14.7091	14.5712	14.5383	14.5445	15.2154	15.1158	15.0843	15.0839	15.3827	15.3575	15.484	15.4648	+	GI_GC	2.31011	0.0137135	0.601378	2.51945	M1ACZ9
18.0638	17.9063	17.7944	17.8745	17.3077	17.1507	17.3835	17.2363	16.8418	16.8418	16.8206	16.9538	16.3797	16.254	16.4564	16.4359	+	GI_GC	3.84054	0.00114529	-0.640193	-3.65312	M1AD01
15.6174	15.6332	15.7157	15.6341	15.8805	15.7989	15.7759	15.9045	16.0565	15.9748	15.9586	15.9027	16.0105	16.1168	16.1042	16.1739	+	GI_GC	2.59785	0.00816671	0.189869	1.37392	M1AD15
16.8502	16.8568	16.8554	16.8498	16.9939	16.9518	16.9825	16.9822	16.7998	16.8347	16.8063	16.8247	16.8621	16.9631	16.9154	16.9422	+	GI_GC	4.99948	0.000292528	0.124535	1.14054	M1AD29
17.2847	17.2723	17.3079	17.2928	17.391	17.3826	17.423	17.3985	17.1765	17.1745	17.1417	17.1701	17.3066	17.2562	17.2729	17.2792	+	GI_GC	4.11714	0.00076974	0.109344	0.980846	M1AD62
16.185	16.2748	16.2305	16.115	16.3513	16.3269	16.2865	16.3329	15.1693	15.2178	15.1917	15.1976	15.0238	15.1101	15.2631	15.0644	+	GI_GC	1.81168	0.0341604	0.123069	0.900007	M1AD94
14.9978	14.9667	14.9822	15.1101	14.8297	14.6667	14.7599	14.8278	15.1611	15.1323	15.1569	15.1592	15.0739	14.873	14.9232	15.0445	+	GI_GC	2.5353	0.00912225	-0.243146	-1.6171	M1ADA3
16.473	16.3133	16.3969	16.4017	15.7865	15.8069	15.8328	15.8756	15.9412	16.0097	15.9614	16.0121	15.5785	15.5879	15.6111	15.4779	+	GI_GC	5.26826	0.000224858	-0.570776	-4.13943	M1ADA6
16.4194	16.41	16.3787	16.3792	16.1119	16.1083	16.251	16.2026	15.9924	16.2442	16.0768	16.2209	15.8955	15.7936	15.9855	16.0298	+	GI_GC	3.10149	0.00362474	-0.22836	-1.67101	M1ADI8
15.1232	14.9422	15.024	14.9818	15.262	15.241	15.2594	15.2471	14.9784	15.0596	14.9249	14.9846	14.9186	15.0299	14.9833	15.0045	+	GI_GC	3.00921	0.00417411	0.234582	1.68512	M1ADI9
14.3514	14.0437	14.2889	14.389	14.6434	14.3968	14.6028	14.7379	14.1379	14.097	14.0793	14.152	14.0227	14.1856	14.1872	14.0554	+	GI_GC	1.66893	0.0440023	0.326949	1.58818	M1ADK1
15.9321	16.0682	16.0339	16.0484	16.3243	16.3491	16.3629	16.3206	16.3211	16.3068	16.2295	16.2172	16.4393	16.4458	16.4296	16.3986	+	GI_GC	4.22818	0.000646806	0.318562	2.41386	M1ADQ4
15.9181	15.9382	15.956	15.8894	16.2743	16.4463	16.3023	16.2688	16.0486	16.0657	16.0504	16.0504	16.0136	16.0053	15.9202	15.912	+	GI_GC	3.97943	0.00094549	0.397506	2.75785	M1ADR9
13.6412	13.6914	14.2846	13.7591	15.2467	14.954	14.7248	14.775	13.7841	12.2118	13.0106	13.1265	13.5985	13.577	13.2973	13.7297	+	GI_GC	2.89698	0.00503504	1.08104	3.72935	M1ADS0
15.2464	15.2039	15.1847	15.1436	15.0959	15.1121	15.0828	15.0865	15.1244	15.0552	15.0989	15.0895	15.0298	15.0567	15.05	14.9981	+	GI_GC	2.38345	0.0120635	-0.100315	-0.820048	M1ADY4
16.4993	16.5607	16.6093	16.4772	16.6946	16.6851	16.7448	16.8537	16.0553	16.2522	16.1797	16.1062	16.0703	16.1761	16.4712	16.4309	+	GI_GC	2.26942	0.0147964	0.207972	1.39644	M1AE00
17.516	17.5676	17.5486	17.5559	17.6569	17.6924	17.6865	17.6337	17.459	17.5305	17.4198	17.4491	17.5331	17.5522	17.4669	17.4312	+	GI_GC	3.32292	0.00247833	0.120362	1.02379	M1AE01
15.767	15.8054	15.8049	15.8136	15.9553	15.9745	15.9827	15.8941	15.9336	15.9479	15.9517	15.9879	15.9983	16.1102	16.0633	16.0384	+	GI_GC	3.31134	0.00251767	0.153952	1.25594	M1AE02
15.7205	15.6542	15.6861	15.7439	16.2642	16.122	16.2103	16.3129	15.8303	15.639	15.7898	15.751	15.8189	15.9471	15.8341	15.8448	+	GI_GC	4.60665	0.000415028	0.526171	3.61954	M1AE23
15.8961	15.8377	15.8606	15.8694	15.7896	15.7673	15.7846	15.7885	15.8704	15.7965	15.8822	15.895	15.8002	15.8167	15.8181	15.8212	+	GI_GC	3.1493	0.00334781	-0.0834396	-0.73762	M1AE33
16.3957	16.4569	16.502	16.4514	17.0459	16.8638	16.9958	16.9298	16.2612	16.2197	16.1829	16.0907	16.2566	16.4678	16.3617	16.2729	+	GI_GC	4.52482	0.000453063	0.507331	3.49408	M1AE74
14.6787	14.6852	14.6784	14.6834	15.1733	15.1126	15.0834	15.1045	14.5277	14.6255	14.515	14.4754	14.5241	14.5599	14.5153	14.5015	+	GI_GC	6.30436	0.000116341	0.437052	3.6613	M1AE79
17.4715	17.4518	17.4855	17.438	17.2786	17.2372	17.2991	17.175	17.8655	17.9657	17.8112	17.9798	18.0636	18.1549	17.9831	18.0051	+	GI_GC	3.47458	0.00193594	-0.214209	-1.65646	M1AE81
15.4287	15.4509	15.3876	15.4501	15.7813	15.8448	15.6263	15.6419	15.6068	15.65	15.6003	15.5976	15.5951	15.572	15.4765	15.5714	+	GI_GC	2.74382	0.00638489	0.294278	1.89408	M1AEB9
18.8281	18.7183	18.7816	18.8234	18.9315	18.8487	18.9302	18.9455	18.7707	18.7747	18.7774	18.7675	18.7477	18.7804	18.71	18.7272	+	GI_GC	2.02036	0.0233646	0.126114	0.94357	M1AED5
14.238	14.0775	14.4403	14.4863	14.7883	14.8459	14.9058	14.8496	14.8414	14.763	14.8501	14.7483	14.7755	14.8089	14.7021	14.8423	+	GI_GC	2.82095	0.00569657	0.536898	2.71765	M1AED8
14.5057	14.5816	14.55	14.6771	14.9972	14.9133	15.0072	14.9216	14.561	14.5518	14.6356	14.5981	14.6641	14.8336	14.6613	14.647	+	GI_GC	3.89098	0.00105592	0.381213	2.64939	M1AEF2
16.2851	16.3323	16.2716	16.3516	16.5881	16.642	16.4554	16.441	16.4559	16.5158	16.5913	16.5406	16.7307	16.5762	16.5397	16.6108	+	GI_GC	2.23413	0.0158045	0.221452	1.44724	M1AEH2
16.171	16.1615	16.2052	16.2019	16.3948	16.4161	16.4433	16.3908	16.3708	16.3535	16.3826	16.4006	16.4661	16.4014	16.3837	16.4203	+	GI_GC	5.06458	0.000283977	0.226332	1.94649	M1AEP7
17.2757	17.3068	17.2057	17.2525	17.3716	17.3506	17.3495	17.3297	17.0089	17.2456	17.0626	17.0644	17.1621	17.1211	17.1904	17.2108	+	GI_GC	2.11086	0.0197489	0.0901456	0.733127	M1AEP8
18.4146	18.4943	18.5211	18.4429	18.7585	18.7538	18.7366	18.7311	18.6689	18.6665	18.6301	18.6054	18.9291	18.9049	18.9416	18.9536	+	GI_GC	4.48789	0.000474253	0.276798	2.21391	M1AF31
16.4724	16.5176	16.4377	16.49	16.8893	16.815	16.8554	16.67	16.5886	16.5788	16.5321	16.523	17.0757	16.8459	16.9489	17.0148	+	GI_GC	3.17153	0.00321667	0.328018	2.1711	M1AF34
15.6438	15.3722	15.4898	15.4861	14.9889	15.1312	14.9326	14.9604	15.4085	15.3632	15.3749	15.424	15.2649	15.1406	15.2241	15.181	+	GI_GC	3.35772	0.00234787	-0.494686	-2.89063	M1AF40
16.4481	16.504	16.5324	16.412	16.6058	16.6373	16.6086	16.5928	16.4521	16.4308	16.4407	16.47	16.9483	16.9185	16.8972	16.8268	+	GI_GC	2.51105	0.00951231	0.136992	1.06445	M1AFA9
16.2477	16.0202	16.3289	16.0127	15.4142	15.4626	15.1935	15.5342	15.215	15.2702	15.2231	15.1564	14.6241	14.8522	15.0206	14.1063	+	GI_GC	3.34154	0.00240872	-0.75127	-3.59845	M1AFC7
16.9043	16.929	16.9061	16.8067	16.7407	16.81	16.7474	16.7258	16.7491	16.7999	16.7891	16.7274	16.7961	16.6632	16.721	16.7024	+	GI_GC	2.12945	0.0191221	-0.130562	-0.982102	M1AFI4
16.0972	15.9443	15.9647	15.6852	16.3416	16.3173	16.1186	16.4349	13.5889	13.8975	14.2846	12.7265	12.8322	13.367	12.4274	13.5752	+	GI_GC	1.88835	0.0297282	0.380247	1.82066	M1AFK2
16.5789	16.3487	16.4181	16.454	16.0704	15.9177	15.8615	16.0728	16.703	16.438	16.5562	16.7815	16.5388	16.6075	16.5023	16.5606	+	GI_GC	3.19838	0.0030566	-0.469322	-2.72469	M1AFS5
15.4775	15.2349	15.6678	15.4171	16.0172	15.9821	15.8634	16.0275	15.1857	15.0454	14.7584	14.8355	15.6705	15.6257	15.5497	15.7377	+	GI_GC	2.7801	0.0060747	0.523227	2.65813	M1AFW4
14.7749	14.6991	14.6403	14.6019	15.3978	15.6049	15.2557	15.1445	14.2734	14.0605	14.267	14.3726	14.3422	14.233	14.2362	14.1824	+	GI_GC	3.13583	0.00341889	0.671701	3.25696	M1AG32
15.0827	15.1251	15.1297	15.0854	15.3506	15.2649	15.2778	15.1956	15.2285	15.1949	15.1986	15.2075	15.3721	15.4162	15.351	15.3772	+	GI_GC	2.55529	0.00878387	0.166484	1.24093	M1AG92
17.5771	17.6159	17.5955	17.6031	17.5606	17.5389	17.584	17.5426	17.5697	17.5737	17.5792	17.5212	17.6586	17.4581	17.6244	17.6368	+	GI_GC	1.70647	0.0412465	-0.0414019	-0.366008	M1AGG3
16.4077	16.4011	16.3261	16.3248	16.5993	16.6724	16.619	16.6064	16.0704	16.227	16.0966	16.0495	16.1105	16.0793	16.0699	16.0076	+	GI_GC	4.03053	0.000869863	0.259346	2.02295	M1AGU2
14.8906	14.9773	15.0011	14.9674	15.4085	15.491	15.4627	15.4869	15.5418	15.476	15.597	15.6247	16.1864	16.2583	16.1901	16.3051	+	GI_GC	5.49813	0.000180353	0.503182	3.8551	M1AGU4
16.481	16.4624	16.508	16.459	16.7007	16.5766	16.6464	16.6833	16.5653	16.5187	16.5299	16.5494	16.6804	16.6894	16.703	16.6708	+	GI_GC	2.96295	0.00451762	0.174169	1.34276	M1AGW8
17.529	17.5837	17.5635	17.5351	17.4302	17.3998	17.4467	17.4755	17.6752	17.736	17.6502	17.6812	17.6926	17.7311	17.7177	17.6474	+	GI_GC	2.88067	0.00514926	-0.114779	-0.954057	M1AH70
17.2763	17.3137	17.2598	17.2855	17.2285	17.1898	17.2408	17.2378	17.0897	17.0883	17.085	17.1307	17.094	17.0463	17.0756	17.1157	+	GI_GC	1.97495	0.0254042	-0.0596237	-0.512691	M1AHA7
16.1435	16.0646	16.0593	16.0281	15.5963	15.5351	15.5804	15.5558	15.7743	15.7137	15.7808	15.7482	15.4572	15.4898	15.5007	15.4839	+	GI_GC	5.73634	0.000152311	-0.50699	-3.96016	M1AHD8
16.6714	16.5881	16.6334	16.6244	16.2907	16.0894	16.318	16.4358	16.4211	16.5284	16.4542	16.5139	16.3699	16.428	16.3916	16.3997	+	GI_GC	2.46746	0.0102674	-0.345849	-1.98815	M1AHH2
12.4547	12.7412	12.8085	12.5621	11.915	12.172	11.823	11.9785	13.2464	13.1965	13.4564	13.522	12.869	12.737	12.7491	12.9586	+	GI_GC	3.05371	0.00387274	-0.669475	-3.19199	M1AHJ1
16.8445	16.678	16.6388	16.6934	16.586	16.4821	16.5002	16.5897	16.6637	16.6281	16.699	16.7508	16.5483	16.5742	16.6068	16.5107	+	GI_GC	1.77159	0.0366857	-0.17419	-1.13714	M1AHJ7
16.484	16.4275	16.4921	16.4625	16.6309	16.625	16.6256	16.544	16.4466	16.4746	16.4253	16.5029	16.5549	16.4327	16.444	16.5076	+	GI_GC	2.8281	0.00563472	0.139916	1.11627	M1AHN5
15.8843	15.764	15.8166	15.7936	15.9499	16.0329	15.9291	15.9691	15.9352	15.8426	15.9441	15.9086	15.8965	15.9432	15.8859	15.9057	+	GI_GC	2.42163	0.0112701	0.155627	1.16129	M1AHP3
17.3276	17.3127	17.3259	17.2426	17.2077	17.203	17.1497	17.1433	11.8339	12.8386	11.7298	12.7345	12.1452	12.3075	11.9285	12.1667	+	GI_GC	2.51569	0.00944382	-0.126291	-0.999151	M1AHY2
16.8113	16.9011	16.8215	16.7581	17.3294	17.2102	17.1883	17.1568	16.6966	16.7557	16.6715	16.6875	16.7681	16.7629	16.8062	16.7545	+	GI_GC	3.78543	0.00122189	0.398173	2.69264	M1AHY9
17.1071	17.1748	17.1332	17.1461	17.3786	17.3762	17.3835	17.3129	16.9011	16.9881	16.8529	16.9328	17.0377	16.997	16.9872	17.0296	+	GI_GC	4.28282	0.000595106	0.2225	1.82611	M1AHZ8
13.6634	13.5431	13.4085	13.6855	14.5452	14.4143	14.4518	14.4978	13.5975	13.508	13.3425	13.4232	13.5539	13.4926	13.7746	13.488	+	GI_GC	4.88088	0.000305062	0.902147	5.31421	M1AI12
18.1063	18.121	18.1109	18.0999	18.0699	18.0318	18.0767	18.0539	18.222	18.193	18.1945	18.2184	18.2943	18.2833	18.2758	18.288	+	GI_GC	2.48208	0.0100522	-0.0514369	-0.463716	M1AI49
14.0238	13.977	14.2495	14.1434	12.7265	12.9621	13.9187	12.2675	13.8246	14.0869	13.9322	14.092	13.6092	13.1016	13.8644	13.2776	+	GI_GC	1.72913	0.0395338	-1.12974	-2.49216	M1AI82
15.7638	15.7667	15.7842	15.7592	15.9444	15.8753	15.9415	15.9353	15.8958	15.809	15.7295	15.9002	16.063	16.0625	15.9703	16.0728	+	GI_GC	3.97985	0.00094549	0.155648	1.32716	M1AIF8
16.2288	16.1244	16.0725	16.0877	15.8013	15.7292	15.7794	15.8227	16.3478	16.2505	16.3685	16.3891	16.2062	16.1213	16.1528	16.2239	+	GI_GC	3.84369	0.00114187	-0.345165	-2.4564	M1AIS6
15.6161	15.3942	15.4439	15.4911	15.1327	14.8073	14.9845	15.1315	15.3815	15.2325	15.2571	15.2454	15.1855	15.1922	15.1242	15.0954	+	GI_GC	2.69957	0.00682922	-0.472311	-2.4771	M1AIT2
16.7977	16.7722	16.8058	16.7523	16.9894	16.9575	16.8634	16.9249	16.5728	16.5018	16.517	16.5924	16.7273	16.6507	16.7079	16.6368	+	GI_GC	2.66835	0.00720492	0.151783	1.17155	M1AIV9
15.8612	15.9059	16.1017	15.9782	16.1624	16.213	16.3134	16.2788	15.7488	15.739	15.723	15.8893	15.8034	15.9336	15.9222	15.5208	+	GI_GC	2.3825	0.0120745	0.280126	1.72514	M1AIX7
16.775	16.7079	16.6253	16.5776	17.1776	17.09	16.9216	16.9966	16.9765	16.7643	16.8968	16.9468	17.1174	16.9573	16.9628	16.9906	+	GI_GC	2.73611	0.00648207	0.374963	2.1954	M1AJ04
14.2568	14.1577	14.0911	14.1465	13.5914	13.5876	13.6868	13.8353	14.2828	14.3117	14.2243	14.5087	13.8301	14.0341	13.9147	13.9959	+	GI_GC	3.44705	0.00201574	-0.487737	-2.91131	M1AJ16
15.6742	15.7108	15.6357	15.6405	15.4323	15.4435	15.4194	15.4	15.4651	15.449	15.5552	15.6309	15.4686	15.3349	15.4401	15.4123	+	GI_GC	4.74043	0.00035362	-0.241513	-2.01689	M1AJ37
15.0857	15.0854	15.0963	15.1194	15.2779	15.1864	15.2034	15.2706	15.0049	15.0329	14.9994	14.9425	15.0252	14.9297	15.0387	15.1704	+	GI_GC	2.86666	0.00528119	0.137874	1.10702	M1AJA2
17.7589	17.6682	17.7498	17.7217	17.4842	17.5659	17.4564	17.5581	18.0791	17.7858	18.0261	18.0967	18.0927	18.1248	18.0906	18.0536	+	GI_GC	3.06931	0.0037985	-0.208511	-1.55668	M1AJB4
16.4693	16.3519	16.4954	16.4286	16.2401	15.8265	16.074	15.9637	15.9844	15.7081	16.1451	16.065	15.7069	16.209	15.9397	15.9509	+	GI_GC	2.34771	0.0128457	-0.410262	-2.12676	M1AJC5
16.7754	16.8428	16.7439	16.7349	16.6084	16.6179	16.5386	16.5914	17.106	17.1394	17.1249	16.9859	17.0573	17.0469	17.0823	17.0702	+	GI_GC	3.06545	0.00381573	-0.185174	-1.42225	M1AJD8
19.937	19.9432	19.9409	19.9244	19.8553	19.8715	19.8881	19.8452	19.9499	19.9601	19.9614	19.9782	19.9833	20.0148	19.9753	19.9283	+	GI_GC	3.34772	0.00238741	-0.071352	-0.646867	M1AJF6
[truncated: 966 more rows]

## Sheet: Sig II vs IC
GC1	GC2	GC3	GC4	GI1	GI2	GI3	GI4	IC1	IC2	IC3	IC4	II1	II2	II3	II4	Student's T-test Significant II_IC	Student's T-test significant	-Log Student's T-test p-value II_IC	FDR	FC	Student's T-test Test statistic II_IC	Protein ID	Descriptions
[truncated: 893 more rows]
