# Supplementary material for: Large-Scale Protein and Phosphoprotein Profiling to Explore Potato Resistance Mechanisms to Spongospora subterranea Infection
Source: Front Plant Sci. 2022 Apr 14;13:872901. doi: 10.3389/fpls.2022.872901 (PMC9047998; doi:10.3389/fpls.2022.872901)
Supplement: Supplementary file 2 [file Table_2.XLSX]

## Sheet: Up in both
Protein ID	FC in Glad	FC in Iwa
M0ZQ25	1.40474	1.01111
M1B310	0.487951	0.900297
M0ZW28	0.527532	0.849913
M1CFT0	0.641065	0.790797
M1BZY6	0.815466	0.776049
M1C835	0.748382	0.765235
M1AM40	0.716081	0.689644
M1AFW4	0.523227	0.689637
M1AGU4	0.503182	0.675072
M1CCE5	0.77991	0.646651
M1AN84	0.457633	0.616127
M1B0E5	0.959265	0.614959
M1D253	0.618378	0.596092
M1CZA3	0.547394	0.586009
M1CKP4	0.643502	0.582236
M1A7Q9	1.41721	0.567185
M1BL62	0.820014	0.550042
M1C3R6	0.52005	0.549479
M1CVX7	0.250722	0.547947
M0ZPB6	0.519482	0.532163
P80471	0.47893	0.52041
M1B216	0.259465	0.520119
M1D3M9	0.64735	0.51153
M1BVA9	0.306942	0.497133
M1D3C0	1.25825	0.496996
M1AA93	0.401097	0.493333
M1A8S4	0.281549	0.47203
M1BMA8	0.525727	0.454444
M1BHZ7	0.381015	0.453599
M1BEK6	0.562593	0.451788
M1AFA9	0.136992	0.449308
M1BBJ6	0.462301	0.446957
Q5QJA7	0.337688	0.446395
M1BHJ9	0.365782	0.443712
M0ZQY1	0.283875	0.440637
M0ZQ21	0.512663	0.437806
M1CU92	0.48017	0.42925
M1CFZ7	0.832541	0.424026
M1AQ00	0.427837	0.419189
M1AF34	0.328018	0.415718
Q9FS87	0.390656	0.411715
M1DX09	0.529866	0.411484
M0ZIM5	0.144947	0.403804
M1ARF5	0.242821	0.400065
M1AY17	1.33241	0.39438
M1C7Y9	0.378385	0.39356
M0ZNL5	0.712641	0.389294
M1B8K1	0.663034	0.386761
M1AT18	0.605328	0.385757
M1CAF1	0.728544	0.383858
M1B8J3	0.618747	0.378974
M0ZIV1	0.222759	0.373115
M1CDJ0	0.20731	0.371065
M1AUM6	0.399145	0.370592
M1C6B8	0.384385	0.36056
M1B853	0.28981	0.360201
M1A396	0.632277	0.354194
M1A8P1	0.399705	0.34809
M1D114	0.423624	0.344589
M1D508	0.127798	0.342525
M1CWI5	0.486814	0.340158
M1D113	0.565641	0.339985
M1B0M9	0.387997	0.334176
M1CQN5	0.245973	0.332173
M1BDY2	0.152604	0.326798
M1A065	0.365793	0.326621
M0ZKX2	0.201335	0.326382
M1D0A6	0.641823	0.323105
M1B6R5	0.168609	0.320672
M1BC20	0.383183	0.319726
M1B6Y2	0.241102	0.310554
M1CWA6	0.376004	0.309131
M1BMS5	0.227369	0.308591
M1D5G4	0.44792	0.308355
M1B5A8	0.278639	0.304194
M1AP59	0.189385	0.30384
M1BYR1	0.277062	0.303346
M1CU28	0.285201	0.299622
M1ACZ9	0.601378	0.297394
M1AM69	0.970821	0.295527
M1AF31	0.276798	0.28959
M1CUF4	0.219058	0.288233
K7WNY2	0.236233	0.282946
M1CEU1	0.214201	0.279136
M1CU22	0.23542	0.279096
M1D7F6	0.182072	0.277794
M0ZG39	0.427505	0.277602
M1BTA3	0.319227	0.277572
M1D6A3	0.241891	0.276153
M0ZMP4	0.614465	0.274518
M1BMY7	0.231379	0.271934
M1C2Y5	0.303758	0.2671
M1CCV4	0.311261	0.265933
M0ZL28	0.55087	0.264149
M1A713	0.33485	0.261137
M1C8L3	0.263434	0.259631
M1AWZ7	0.362244	0.257648
M1CH68	0.0802536	0.255115
M1B007	0.160072	0.254234
M0ZS65	0.093596	0.250577
M1C1S9	0.427403	0.250191
M1BCR0	0.248991	0.24986
M1B6P7	0.202732	0.249679
M0ZIF8	0.0988402	0.249255
M1BMS6	0.15525	0.248675
M1CP35	0.358054	0.247795
M1BU84	0.345562	0.24614
M0ZKQ8	0.360731	0.24475
M1CNJ1	0.375856	0.244605
M1CZI3	0.527458	0.243562
M1B661	0.224852	0.241774
M0ZI96	0.192256	0.241475
M1CDC1	0.273072	0.241291
M1CZX4	0.212777	0.239876
M0ZJT7	0.404032	0.235483
M1AYY7	0.639687	0.234767
M1C102	0.280005	0.233923
M0ZI98	0.540021	0.233614
M1D3Q7	0.194353	0.232722
Q38JI9	0.291853	0.228602
M1D130	0.160659	0.227204
M1A7Q3	0.390399	0.22578
M1D6K2	0.418085	0.224576
M1BT60	0.20445	0.223359
M1BGS9	0.397791	0.219519
M0ZJY9	0.184662	0.216505
M1D0M1	0.327946	0.214891
M1B8R6	0.330632	0.213277
M1C132	0.318748	0.212598
M1CWH1	0.245567	0.211081
M1BQV8	0.364391	0.209987
M1BEG6	0.461687	0.20855
M1AIF8	0.155648	0.208524
Q5CZ53	0.182611	0.208403
M1BCC6	0.0529938	0.207586
M0ZY56	0.187665	0.204718
M1BZG1	0.138558	0.202574
M1B818	0.376653	0.198778
M1C1K7	0.221653	0.197458
M1AU85	0.2987	0.196905
M1CL36	0.115756	0.195224
M1AU78	0.1119	0.194316
M1D127	0.383317	0.193561
P93787	0.123487	0.191812
M1CBK0	0.37376	0.190352
M1BFV1	0.378974	0.189436
M1BGA6	0.407024	0.188931
M0ZSA3	0.208574	0.187918
M1CSB2	0.215142	0.187891
M1C0N9	0.17104	0.186388
M1C5X7	0.314073	0.186045
M1D6E4	0.253291	0.185961
M1DGC6	0.160133	0.185914
M1D5W8	0.171002	0.185344
M1C9M8	0.206292	0.182973
M1A028	0.327925	0.180797
M1CSJ8	0.115541	0.17912
M1D3D7	0.121533	0.17875
M1BZZ0	0.216134	0.17853
M1B839	0.0901556	0.176324
M1AXB5	0.30005	0.175546
M0ZHB0	0.252857	0.175396
D5ILC3	0.0947576	0.173611
M1BK48	0.392064	0.172914
P29757	0.156622	0.172348
M1CHE3	0.40397	0.172038
M1AG92	0.166484	0.171741
M1A4G8	0.253831	0.171307
M1D2H8	0.0850658	0.170622
M1AQ24	0.29154	0.168959
Q3HRY1	0.220963	0.168459
M1B225	0.106555	0.168197
M1CYG2	0.278958	0.166508
M1CRH2	0.0572944	0.165565
M1ATL9	0.307886	0.165429
M1AY79	0.282793	0.165395
M1AUH9	0.345685	0.164255
M1CTR3	0.259611	0.162382
M1C5K3	0.199612	0.162268
M1B690	0.229167	0.162171
M1D751	0.112583	0.160611
M1BJ21	0.1277	0.160336
M1ADQ4	0.318562	0.159696
M1BBV1	0.28709	0.15959
M1BSG4	0.295398	0.159163
M1BFJ5	0.211815	0.159093
M0ZJ08	0.301491	0.157323
M1BCU6	0.210056	0.154555
M1BYS9	0.191067	0.153874
M1CTV7	0.299934	0.151561
M1A1W0	0.249751	0.151024
M1CVV1	0.192348	0.150121
M1A7Z9	0.0925941	0.149135
M0ZHQ8	0.280958	0.148632
Q9SQ76	0.243303	0.147938
M1D4K8	0.139614	0.145399
M1AGW8	0.174169	0.145082
A8UGP3	0.212123	0.144852
M1CD27	0.300825	0.144253
M0ZKQ9	0.337487	0.143647
M1CUU9	0.121559	0.14221
M1C4Q8	0.303006	0.141382
M0ZV96	0.226219	0.138346
M1AIV9	0.151783	0.13465
M1AWS1	0.423045	0.134217
M1AQH0	0.120659	0.133424
M0ZQP4	0.380956	0.133266
P29677	0.225197	0.133217
M1CLN0	0.300597	0.132242
M1AYV2	0.109252	0.132076
M1CAI4	0.204032	0.131632
M1D0R2	0.138098	0.13146
M1CPB7	0.202783	0.13043
M1CIS3	0.137958	0.130192
M1CB97	0.181148	0.12897
M1B274	0.150267	0.128807
M1CHA7	0.340023	0.127297
M1CAH6	0.0947332	0.126735
M1B7C9	0.361359	0.125685
M1CAV4	0.135904	0.125183
M1ANN8	0.382546	0.123355
M1D278	0.104644	0.122262
M1CLN2	0.345075	0.121725
M1D096	0.219607	0.120112
M1CCF1	0.265764	0.119637
M1CFQ4	0.370127	0.116244
M1CGX3	0.275217	0.115034
M1AK55	0.0927458	0.113516
M1AD62	0.109344	0.113051
K7WP02	0.166878	0.111821
M1D982	0.155582	0.109105
M1C9T0	0.351942	0.108011
M0ZSN2	0.274078	0.106817
P37225	0.149089	0.105701
M1CRA1	0.257879	0.104727
M1AD29	0.124535	0.104341
M1BT61	0.178851	0.104021
M0ZWB1	0.127145	0.103637
M0ZJM5	0.106739	0.103122
M1ATB8	0.124307	0.100345
M1B815	0.0816159	0.100156
M1AKN6	0.177868	0.100153
P52903	0.177205	0.0981731
M1C6M7	0.192873	0.09745
M1AE02	0.153952	0.0972817
M1BQR5	0.155715	0.0966022
M1BJT8	0.0726447	0.0955815
M1ACT7	0.192625	0.0897808
Q43644	0.140337	0.0886064
P42055	0.0840192	0.0876245
M0ZHD0	0.191796	0.087338
M1B7A2	0.252256	0.0861592
M1BM43	0.202757	0.0794916
M1AQ30	0.175952	0.0775723
M1C005	0.11833	0.0762911
M1CTQ6	0.199965	0.0755758
M1CDD9	0.198414	0.071301
M1BDK7	0.189475	0.0701642
M1CR31	0.205431	0.067719
M1BDN6	0.158234	0.0650406
M1BEN2	0.126328	0.0650339
Q8H9D4	0.199545	0.0608141
M1C075	0.221469	0.0574555
M1A6K1	0.179994	0.0445528

## Sheet: Down in both
Protein ID	FC in Glad	FC in Iwa
M1CKP9	-3.72934	-2.12601
M1AMY4	-2.05389	-1.26086
M1CE49	-2.04242	-1.6624
M1CYK9	-1.84537	-1.78252
M1B5Y3	-1.6156	-0.489712
M1CZM0	-1.61371	-2.16251
M1AKE5	-1.57204	-2.81756
M1ARW6	-1.40547	-1.58552
M1CU73	-1.38497	-0.617768
M1CKI7	-1.33864	-1.73715
M1BXE6	-1.09177	-0.636689
M1CVR0	-1.07531	-0.709395
M1BWS8	-1.06247	-0.787631
M1BBJ1	-1.01835	-0.306679
M1BKE9	-0.916338	-0.906582
M0ZSL5	-0.878372	-0.666553
M1CC88	-0.853816	-1.22501
M1AN86	-0.830413	-0.383926
M1BNZ1	-0.821899	-1.69186
M0ZSN7	-0.78481	-0.857708
M1B1N3	-0.769495	-0.76388
M1A423	-0.767765	-0.556706
M1C015	-0.733391	-0.565011
M1B1I3	-0.726101	-0.675797
M1CZU3	-0.721378	-0.325411
M1BD45	-0.715958	-0.515916
M1CLS4	-0.715607	-0.914619
M0ZMB0	-0.71313	-0.322724
M1BCJ0	-0.692373	-0.546276
M1AHJ1	-0.669475	-0.52688
M1BPZ4	-0.667067	-0.577818
M1C8F8	-0.656133	-0.592673
M1CN19	-0.64378	-0.376724
M1CT08	-0.64167	-0.660198
M1BYY9	-0.641102	-0.693624
M1AD01	-0.640193	-0.482996
M1CNA2	-0.621693	-0.213542
M1AAS7	-0.611513	-0.693515
M1CVZ7	-0.608206	-0.440013
M1CIH0	-0.605801	-0.370003
M1BD68	-0.599637	-0.877476
M1B234	-0.596861	-0.540195
M1CU69	-0.595099	-0.864284
Q38JH8	-0.589715	-0.614826
Q2VEE3	-0.587487	-0.361657
M1CHE2	-0.573173	-0.408261
M1AZL8	-0.571615	-0.325366
M1ADA6	-0.570776	-0.417275
M1B8U7	-0.562564	-0.176151
Q2VEE5	-0.562226	-0.212375
M1CUD0	-0.557564	-0.760918
Q2VEB7	-0.544321	-0.254926
M1C7P0	-0.543117	-0.522751
M1BHG8	-0.542613	-0.329041
M0ZMF8	-0.542164	-0.26714
M1BUJ8	-0.530986	-0.302468
M1A4Q9	-0.528707	-0.164052
Q27S25	-0.528622	-0.243001
M0ZND0	-0.526182	-0.258039
Q2VEF5	-0.51719	-0.268845
M1ASB9	-0.509391	-0.306782
M1AHD8	-0.50699	-0.27134
M1CL35	-0.503142	-0.234797
Q2VEH5	-0.50289	-0.189632
M1AF40	-0.494686	-0.190035
M1CR39	-0.491691	-0.323245
P37822	-0.491384	-0.788337
M1AJ16	-0.487737	-0.388162
M1BDQ7	-0.486609	-0.0831418
M0ZIC3	-0.483963	-0.272415
M1CQA2	-0.480454	-0.36106
M1D7G7	-0.475978	-0.24723
M1CIA9	-0.47544	-0.286744
Q2VEC4	-0.475399	-0.272131
M1CQG1	-0.474049	-0.292873
M1A0E2	-0.473411	-0.185545
M1B5R1	-0.4654	-0.200307
M1CKK2	-0.464213	-0.241578
M1CWN2	-0.464159	-0.211041
Q2VED8	-0.462045	-0.226034
M1AA49	-0.462032	-0.255871
P32087	-0.461204	-0.248996
M1D4F7	-0.460329	-0.772956
M1BEQ3	-0.458825	-0.233016
Q8W214	-0.458133	-0.214015
M1CHF5	-0.456851	-0.193087
Q2VEE4	-0.455424	-0.236731
M1C7B2	-0.448324	-0.270935
M1AAA0	-0.446043	-0.794147
Q2VEE2	-0.441102	-0.216406
M0ZHR6	-0.440724	-0.299722
M1B588	-0.438044	-0.632594
M1A920	-0.437658	-0.424667
M1BTT7	-0.435025	-0.167912
M1BXA4	-0.433931	-0.438951
Q27S52	-0.433056	-0.654964
M1B9U2	-0.429342	-0.218923
M0ZIP7	-0.423737	-0.30021
M1D1H4	-0.419475	-0.223711
M0ZL78	-0.418811	-0.231973
M1BXA1	-0.416945	-0.363981
Q27S09	-0.415372	-0.25957
M1CL70	-0.414285	-0.277483
M1C114	-0.414267	-0.294142
M1D4F8	-0.413745	-0.81229
M1AUW2	-0.412809	-0.218331
M1D5Y7	-0.411135	-0.236241
M0ZWB6	-0.407444	-0.213894
M1C5M7	-0.403021	-0.195159
Q2VEE7	-0.398525	-0.219946
M0ZQW3	-0.394655	-0.223872
M0ZI35	-0.371461	-0.238227
M1AX56	-0.371341	-0.221441
M1D622	-0.369512	-0.22238
M1BCQ9	-0.367295	-0.309134
M1CNH5	-0.366963	-0.464096
M0ZUA7	-0.361266	-0.191487
M1A989	-0.359529	-0.211992
M1BQF5	-0.354854	-0.211822
M1D0V1	-0.354434	-0.229115
M0ZRJ1	-0.351593	-0.145576
M1CKG8	-0.348775	-0.420853
M1AIS6	-0.345165	-0.162932
M1BWD0	-0.343419	-0.19075
M1CKV9	-0.34278	-0.289405
M1CAJ0	-0.341034	-0.270884
M1AWE0	-0.339551	-0.211534
M1C3Z0	-0.33693	-0.195663
M0ZZV7	-0.335945	-0.446678
M1CQ02	-0.335731	-0.400724
Q2VEE1	-0.334124	-0.229399
M1C744	-0.333566	-0.319197
M1CJ43	-0.333369	-0.659903
M1CGD8	-0.333012	-0.115501
M1BP06	-0.332743	-0.20431
M0ZU44	-0.330805	-0.199863
M0ZL57	-0.330102	-0.202211
M1A6Q8	-0.329255	-0.380569
M1C1T5	-0.328772	-0.161608
M1A8C3	-0.327863	-0.231976
M0ZJN7	-0.327539	-0.276265
Q2VEG6	-0.326653	-0.275805
M1ANJ7	-0.325998	-0.541156
M1CKI9	-0.322067	-0.148902
M0ZIF6	-0.31876	-0.177445
M1BWR1	-0.317794	-0.238378
M1BFS6	-0.317108	-0.193236
M0ZY84	-0.316072	-0.221816
M0ZKS8	-0.313801	-0.235456
M1D367	-0.311166	-0.240867
M1C8D8	-0.310973	-0.138646
M1BG20	-0.308775	-0.533683
M1B4J2	-0.308344	-0.419407
M1D0D3	-0.302894	-0.332306
M1APG2	-0.301665	-0.262637
M0ZG32	-0.301614	-0.309442
M1C9E1	-0.30055	-0.202249
Q3HVL2	-0.294587	-0.165862
M1C9V9	-0.294299	-0.14651
M1BCZ9	-0.288604	-0.152406
M1AUT7	-0.281818	-0.25288
M1CVC9	-0.280262	-0.213499
M1C2L0	-0.278239	-0.450434
M1CA43	-0.275995	-0.216119
M1B5G1	-0.275778	-0.691051
M0ZUN5	-0.275539	-0.195302
M1CJL8	-0.273094	-0.244334
M1BBU4	-0.269123	-0.25562
Q2VEC7	-0.267225	-0.1502
M1BH74	-0.26477	-0.163451
M0ZRG6	-0.263999	-0.191891
M1ARQ6	-0.263083	-0.817733
M1CDM5	-0.261401	-0.31827
M1CFI4	-0.259891	-0.497857
M0ZYC7	-0.25662	-0.340877
M0ZZ66	-0.255262	-0.419101
M1BWR0	-0.253623	-0.229222
E1AXT4	-0.251331	-0.835556
M1A828	-0.25017	-0.171958
M1C0I4	-0.244972	-0.293634
M1CQX3	-0.243441	-0.226023
M1ADA3	-0.243146	-0.173699
M1B7W3	-0.243004	-0.247838
M1BGS3	-0.24277	-0.188912
M1AL41	-0.239696	-0.302768
M1ARZ3	-0.23909	-0.113598
M1BGY6	-0.239013	-0.114563
M1C313	-0.238781	-0.775142
M1BGZ4	-0.238506	-0.251721
M1C689	-0.238002	-0.0964456
M0ZWL6	-0.234442	-0.27502
M1CCA0	-0.233469	-0.151833
M1BY04	-0.227205	-0.258541
M1ABN2	-0.226918	-0.212738
M1D205	-0.226676	-0.150624
M0ZKX1	-0.225291	-0.110665
Q307Y9	-0.224104	-0.223553
M0ZT74	-0.223868	-0.31305
M1A9T7	-0.219985	-0.178441
M1B3D7	-0.215856	-0.148255
M0ZMZ6	-0.213711	-0.258149
M1A6N6	-0.212618	-0.129477
M1CQZ5	-0.212422	-0.320418
M1C5D7	-0.211961	-0.236804
M1AC15	-0.210551	-0.231382
M1CS66	-0.20907	-0.194641
M1ACI6	-0.208921	-0.26976
M1D2W7	-0.208616	-0.287996
M1AYL6	-0.208425	-0.36471
M1BN71	-0.204292	-0.294069
M1ATR5	-0.203053	-0.806987
M1A687	-0.201613	-0.11093
M0ZMV9	-0.197603	-0.282371
M0ZYC4	-0.196723	-0.30737
M1ACM1	-0.196487	-0.06532
M1AWH0	-0.190532	-0.131659
M1CBF6	-0.189143	-0.169511
M1ASK9	-0.188658	-0.191168
M1C704	-0.18677	-0.551417
Q2XTB2	-0.180941	-0.119268
M0ZQN1	-0.180652	-0.0959253
M1D3N1	-0.176353	-0.24163
M1AHJ7	-0.17419	-0.125414
M1CLR3	-0.171679	-0.154716
M1CZ77	-0.170895	-0.170337
M1D4J7	-0.170317	-0.166691
M1B4G0	-0.169949	-0.176743
K7WU45	-0.169363	-0.106637
M0ZKT9	-0.169318	-0.101377
M1BWI7	-0.168391	-0.160944
M0ZWA9	-0.16525	-0.410471
M0ZS26	-0.16505	-0.190295
M1CKC6	-0.164729	-0.138566
Q3HRY7	-0.16395	-0.208905
M1C1T9	-0.163208	-0.169105
M1BAA6	-0.15639	-0.206699
M1C451	-0.155525	-0.156243
Q2XPW4	-0.153432	-0.110575
M1C4H8	-0.15247	-0.141105
M1C5A4	-0.150076	-0.110114
M0ZM32	-0.149395	-0.261131
M0ZR79	-0.147689	-0.222381
M0ZRN4	-0.147246	-0.16517
M1D249	-0.146859	-0.0665441
Q38JI8	-0.146181	-0.128521
M1B8D3	-0.143329	-0.192588
M1C7V7	-0.14331	-0.0802736
B5M4B1	-0.142653	-0.765159
M1AL00	-0.139237	-0.209952
M1C5E3	-0.135273	-0.140436
M1CWU3	-0.132582	-0.155089
M1B556	-0.131925	-0.131815
M0ZY89	-0.131625	-0.135898
M1CN89	-0.129128	-0.180948
M1AAI6	-0.124786	-0.101362
M1BXI3	-0.122432	-0.215848
Q2VCJ5	-0.12196	-0.158473
M1CSN8	-0.11958	-0.195345
Q3HRX7	-0.117844	-0.150657
M1C3X8	-0.116372	-0.219035
A4UV11	-0.115679	-0.150608
M1BV98	-0.113093	-0.120269
M1D095	-0.110034	-0.0891137
Q2VEC5	-0.105961	-0.0944881
K7XKT4	-0.103237	-0.1085
M1B5I2	-0.103117	-0.113743
Q2VCJ2	-0.100657	-0.110619
M1BTN7	-0.100502	-0.493937
M1B1K8	-0.100379	-0.254101
M1B9P5	-0.097034	-0.0837724
M1A7X7	-0.0958271	-0.096947
M1B403	-0.0912905	-0.193976
M1ARI7	-0.0891171	-0.289999
M1AT64	-0.0888109	-0.115305
M1CMQ3	-0.0880444	-0.09131
M1CEF5	-0.0831227	-0.149683
M1AJK6	-0.0800526	-0.25856
P46300	-0.0783615	-0.118607
M1BLM3	-0.0773063	-0.140537
M1A0N5	-0.068881	-0.0488052
M1B4K0	-0.0629058	-0.0964651

## Sheet: up in Glad- down in Iwa
Protein ID	FC in Glad	FC in Iwa
M1B8U0	0.105291	-0.0869985
M1AM23	0.122401	-0.0887489
M1ADR9	0.397506	-0.0910163
M1CWU6	0.224893	-0.0934889
M0ZLC3	0.206131	-0.0936658
M0ZWP5	0.248953	-0.0943372
M1BLB0	0.470031	-0.103714
M1AW83	0.37502	-0.107774
M1ALZ6	0.686193	-0.115875
M1CN40	0.180325	-0.117929
M0ZYC1	0.45615	-0.117978
M1C511	0.246024	-0.118654
M1CY81	0.14565	-0.12407
M1D5N3	0.130219	-0.125633
M0ZPA4	0.370879	-0.130903
K7WNV9	0.169024	-0.135101
M1AWJ2	0.259629	-0.135694
M1C5P2	0.10292	-0.140784
M1AZ99	0.396318	-0.146623
M1DUG5	0.446916	-0.150474
M1CSF3	0.17685	-0.152413
M1CV33	0.137044	-0.157779
M1BHF1	0.146724	-0.168056
M1CC25	0.308727	-0.178005
Q38M71	0.272416	-0.187158
M1CNI7	0.126337	-0.18976
M0ZI18	0.345176	-0.239655
M0ZTK1	0.314573	-0.25187
K7XKT7	0.168348	-0.254597
M1APC7	0.864501	-0.277785
M1CC20	0.581522	-0.28865
P55312	1.15893	-0.323726
M1BNZ3	0.524615	-0.538513
M1A0V3	0.349233	-0.716325
M1AS77	0.97634	-0.732356
Q9M3H3	0.418991	-0.804974

## Sheet: Up in Iwa- down in Glad
Protein ID	FC in Iwa	FC in Glad
M1CK23	0.0881987	-0.0461917
M1AI49	0.0783558	-0.0514369
M1E0E5	0.0842042	-0.06636
M1D586	0.181553	-0.0944858
M1BBH3	0.296666	-0.0977006
M1C990	0.189631	-0.0980606
M1C3A5	0.205077	-0.101818
M1B550	0.17972	-0.104096
M1AXW2	0.130931	-0.109744
M1CKC2	0.13725	-0.134221
M1CS15	0.224378	-0.13761
M1BC29	0.149166	-0.191022
M1A2V5	0.149356	-0.203738
M1AZV2	0.325975	-0.287871
M1CI04	0.250493	-0.515641
