# Supplementary material for: Large-Scale Protein and Phosphoprotein Profiling to Explore Potato Resistance Mechanisms to Spongospora subterranea Infection
Source: Front Plant Sci. 2022 Apr 14;13:872901. doi: 10.3389/fpls.2022.872901 (PMC9047998; doi:10.3389/fpls.2022.872901)
Supplement: Supplementary file 3 [file Table_3.XLSX]

## Sheet: Total
GC1	GC2	GC3	GC4	GI1	GI2	GI3	GI4	IC1	IC2	IC3	IC4	II1	II2	II3	II4	Protein Id	Protein Descriptions
9.97845	9.77136	9.85061	14.8429	14.773	15.5891	16.0694	15.8427	17.0187	17.5373	17.4004	17.817	17.5941	17.7772	17.3313	17.8113	J9ULI1	Osmotic stress-activated protein kinase
9.89915	10.1125	11.4492	9.61503	13.8204	13.9042	14.2382	14.13	10.5337	10.9591	10.7115	10.0288	10.6091	13.6205	11.2687	10.1056	M0ZG82	Chromatin remodeling complex subunit
12.5194	12.63	13.0113	10.4235	9.2446	10.51	11.0597	9.80751	12.5729	13.0719	13.0045	13.1356	10.945	10.1363	10.757	10.2313	M0ZGI4	Diacylglycerol O-acyltransferase
12.5194	12.63	13.0113	10.4692	10.0575	10.4445	10.252	10.765	12.5729	13.0719	13.0045	13.1356	11.3198	10.6639	10.8677	10.3306	M0ZGI7	Diacylglycerol O-acyltransferase
13.373	13.8584	10.3846	11.7839	8.61018	9.33741	10.2847	9.41874	14.048	13.5983	13.2772	13.8077	13.3959	13.9015	13.8337	14.0961	M0ZHP1	GAMYB-binding protein
9.23774	9.3912	9.693	10.0224	12.452	13.1323	13.5206	13.3723	14.8221	15.1022	14.9967	15.4391	15.3986	15.2391	15.0331	15.3307	M0ZIQ4	Pseudo-response regulator 5
9.23774	9.3912	9.693	10.0224	12.452	13.1323	13.5206	13.3723	14.8221	15.1022	14.9967	15.4391	15.3986	15.2391	15.0331	15.3307	M0ZIQ5	Pseudo-response regulator 5
10.4731	11.6589	10.2888	11.154	11.7245	12.048	12.3036	12.5885	11.4846	13.4197	12.0549	11.7135	11.1651	13.7241	13.0759	12.321	M0ZIV9	TPR_REGION domain-containing protein
13.1368	13.9822	13.9693	13.536	13.0927	13.2181	12.9496	13.1439	13.6365	14.0412	13.8387	13.9068	12.9175	13.4754	12.9602	13.2796	M0ZJN5	Serine-threonine protein kinase, plant-type
10.1199	9.96471	10.7196	9.631	10.6417	10.6532	10.6084	11.0794	11.7678	11.7909	11.6322	11.8063	11.9708	11.6484	11.8691	11.1739	M0ZKU3	Zinc knuckle (CCHC-type) family protein
12.4341	12.7315	13.0952	12.8811	9.89294	11.4799	11.5888	9.80159	11.1969	11.7675	11.0805	10.8254	10.6655	10.2824	9.96187	10.4328	M0ZLE5	Inositol hexakisphosphate and diphosphoinositol-pentakisphosphate kinase
9.95273	10.5699	14.3685	9.60457	14.1787	14.995	15.1471	14.9811	11.8909	9.67443	14.2484	10.2784	14.8696	8.96954	11.8393	14.9525	M0ZLE5	Inositol hexakisphosphate and diphosphoinositol-pentakisphosphate kinase
13.9542	14.8146	12.6498	13.6501	9.24585	9.13093	11.9825	10.3701	15.1949	14.936	14.142	13.6386	13.2579	15.0237	14.8578	14.8089	M0ZM13	Pro-resilin
17.0918	17.1756	16.9122	16.5253	15.8548	12.1604	13.5495	15.7024	17.378	17.0568	17.2582	17.739	17.7563	17.5379	17.5761	17.9384	M0ZMN4	High mobility group protein
15.2329	15.4079	14.6877	13.8467	13.4605	11.8093	10.8725	13.36	16.4156	15.6938	16.1418	16.4684	16.7798	16.2359	16.3241	16.5839	M0ZMN4	High mobility group protein
15.2329	15.4079	14.6877	13.8467	13.4605	11.8093	10.8725	13.36	16.4156	15.6938	16.1418	16.4684	16.7798	16.2359	16.3241	16.5839	M0ZMN4	High mobility group protein
20.8489	21.0905	21.1971	21.3135	20.3001	20.8308	20.5965	20.5728	20.1393	20.567	20.2505	20.2649	19.4974	20.0276	19.6326	19.5102	M0ZP30	Pyruvate dehydrogenase E1 component subunit alpha;Pyruvate dehydrogenase E1 component subunit alpha, mitochondrial
20.8489	21.0905	21.1971	21.3135	20.3001	20.8308	20.5965	20.5728	20.1393	20.567	20.2505	20.2649	19.4974	20.0276	19.6326	19.5102	P52903	Pyruvate dehydrogenase E1 component subunit alpha;Pyruvate dehydrogenase E1 component subunit alpha, mitochondrial
13.0052	10.0481	10.7821	10.2898	13.0591	13.3076	13.517	13.8602	14.2437	10.4637	14.324	14.6268	14.5978	10.6437	14.6457	14.89	M0ZPH6	BZIP transcription factor bZIP114
13.0052	10.915	11.3492	11.2042	13.0591	13.3076	13.517	13.8602	14.2437	10.5276	14.324	14.6268	14.5978	11.1568	14.6457	14.89	M0ZPH6	BZIP transcription factor bZIP114
13.0052	10.5393	9.37186	9.73805	13.0591	13.3076	13.517	13.8602	14.2437	10.3415	14.324	14.6268	14.5978	10.7915	14.6457	14.89	M0ZPH7	BZIP transcription factor bZIP114
13.0052	11.1023	9.40506	9.84226	13.0591	13.3076	13.517	13.8602	14.2437	11.4853	14.324	14.6268	14.5978	11.501	14.6457	14.89	M0ZPH7	BZIP transcription factor bZIP114
22.7326	22.9518	22.9368	22.8499	21.8836	22.1971	22.3936	22.4899	23.0508	23.3348	23.1486	23.3008	23.4715	23.6659	23.6042	23.6927	M0ZPZ4	PTAC16
14.5064	14.735	14.5338	14.4851	13.5658	13.7055	14.1297	14.2443	15.0057	15.3256	15.0798	15.1522	15.5935	15.8721	15.7268	15.7962	M0ZPZ4	PTAC16
14.5064	14.735	14.5338	14.4851	13.5658	13.7055	14.1297	14.2443	15.0057	15.3256	15.0798	15.1522	15.5935	15.8721	15.7268	15.7962	M0ZPZ4	PTAC16
14.5064	14.735	14.5338	14.4851	13.5658	13.7055	14.1297	14.2443	15.0057	15.3256	15.0798	15.1522	15.5935	15.8721	15.7268	15.7962	M0ZPZ4	PTAC16
12.7427	12.7112	12.951	12.7022	10.5682	10.2365	11.7984	11.9274	13.3185	14.0085	13.3239	13.5168	13.6373	13.9374	13.8749	13.5661	M0ZPZ4	PTAC16
13.9137	14.0533	14.1981	14.0146	14.1402	14.3932	14.6002	14.7086	13.5552	9.89378	13.5921	13.7386	13.5112	13.9433	13.3907	13.8626	M0ZRQ5	Casein kinase
13.9137	14.0533	14.1981	14.0146	14.1402	14.3932	14.6002	14.7086	13.5552	10.2657	13.5921	13.7386	13.5112	13.9433	13.3907	13.8626	M0ZRQ6	Casein kinase
14.084	13.8315	15.2532	15.1771	13.0131	13.2561	13.3118	13.066	13.7918	14.1028	13.7647	14.0815	12.9456	13.4695	12.6077	12.857	M0ZRY1	Harpin-induced protein
14.3098	14.6712	14.7163	14.4679	14.5993	15.4131	15.8795	15.625	15.2391	15.5312	15.5901	15.7339	16.2113	16.5436	16.1344	16.4691	M0ZSE9	Uncharacterized protein
14.3098	14.6712	14.7163	14.4679	14.5993	15.4131	15.8795	15.625	15.2391	15.5312	15.5901	15.7339	16.2113	16.5436	16.1344	16.4691	M0ZSF0	Uncharacterized protein
14.3098	14.6712	14.7163	14.4679	14.5993	15.4131	15.8795	15.625	15.2391	15.5312	15.5901	15.7339	16.2113	16.5436	16.1344	16.4691	M0ZSF1	Uncharacterized protein
14.3098	14.6712	14.7163	14.4679	14.5993	15.4131	15.8795	15.625	15.2391	15.5312	15.5901	15.7339	16.2113	16.5436	16.1344	16.4691	M0ZSF2	Uncharacterized protein
14.7236	14.7129	13.8705	11.5689	12.3921	10.7065	11.0072	11.7506	14.7901	13.5023	14.2044	14.4033	14.5022	13.8444	14.2945	14.9208	M0ZSL3	Calreticulin
19.9142	20.243	20.2043	19.6845	19.0025	19.4281	19.7013	19.6577	19.4986	19.9581	19.5939	20.1325	19.3706	19.5001	19.5499	19.7383	M0ZST5	Eukaryotic translation initiation factor 5A;Eukaryotic translation initiation factor 5A-4
19.9142	20.243	20.2043	19.6845	19.0025	19.4281	19.7013	19.6577	19.4986	19.9581	19.5939	20.1325	19.3706	19.5001	19.5499	19.7383	P56336	Eukaryotic translation initiation factor 5A;Eukaryotic translation initiation factor 5A-4
13.359	13.8078	13.8656	13.7505	11.8464	9.80971	10.6399	10.2759	13.2099	10.1191	13.5734	13.6626	9.74392	11.0427	13.5718	11.1295	M0ZT89	Chaperonin 21
10.2483	11.7691	11.4739	14.9939	14.6069	14.6453	14.8826	14.925	11.1081	15.2366	14.9793	15.2715	15.0615	14.9397	11.226	15.0331	M0ZTH0	Uncharacterized protein
14.2586	14.4502	14.4212	14.6558	13.9612	14.1241	14.3126	14.1566	11.2046	10.2199	14.9316	10.3067	12.4103	10.5344	14.5674	10.8205	M0ZTH0	Uncharacterized protein
11.3062	9.88709	13.4381	10.5194	13.9325	14.4843	14.5876	14.7925	13.3936	13.9641	13.6147	10.1978	9.95897	14.1922	11.1172	14.0296	M0ZTV9	Cell wall protein TIR4
18.0628	18.2641	18.5502	18.3338	18.4553	18.6491	18.8588	18.8222	18.1387	18.4504	18.2953	18.4929	18.4342	18.3216	18.2369	18.3588	M0ZU86	Nucleic acid binding protein
12.89	13.4732	13.2838	13.0257	12.6044	9.74622	9.7339	10.9912	11.6402	12.476	13.7219	14.2202	9.9651	10.3336	9.97925	12.815	M0ZUD6	Phosphoesterase
12.89	13.4732	13.2838	13.0257	12.6044	10.9444	11.0943	10.0282	11.2386	12.476	13.7219	14.2202	11.6753	9.57388	10.1557	12.815	M0ZUD8	Phosphoesterase
12.89	13.4732	13.2838	13.0257	12.6044	10.3609	11.0821	10.1275	9.99569	12.476	13.7219	14.2202	10.9259	10.5402	10.4676	12.815	M0ZUD9	Phosphoesterase
12.1666	12.4012	12.6292	12.4455	12.5517	12.877	13.1373	13.0505	12.6715	13.1727	12.9494	13.1855	13.1498	13.0088	12.8803	12.9878	M0ZUQ1	RNA binding protein
12.1666	12.4012	12.6292	12.4455	12.5517	12.877	13.1373	13.0505	12.6715	13.1727	12.9494	13.1855	13.1498	13.0088	12.8803	12.9878	M0ZUQ3	RNA binding protein
12.1666	12.4012	12.6292	12.4455	12.5517	12.877	13.1373	13.0505	12.6715	13.1727	12.9494	13.1855	13.1498	13.0088	12.8803	12.9878	M0ZUQ4	RNA binding protein
18.0474	18.3388	18.4376	18.0292	18.3393	18.7327	18.8796	18.8547	17.9994	18.4091	18.1414	18.3111	19.0362	19.2514	18.9915	19.2308	M0ZWJ3	Sugar transporter ERD6-like 6
15.5794	15.99	16.1225	15.7787	15.9178	16.3702	16.7216	16.7048	15.9774	16.4132	16.1771	16.4065	16.668	16.7835	16.6472	16.7983	M0ZWY9	Synapse-associated protein
14.7871	15.1692	15.2752	15.2577	12.9786	13.966	14.8259	14.1237	13.8558	13.5337	14.5688	14.8528	13.4324	11.7712	12.9817	13.7068	M0ZXA6	Triose phosphate/phosphate translocator, chloroplast
10.4264	9.98094	10.3358	9.75297	11.2614	12.1714	12.181	12.7819	10.6439	10.3226	10.1834	10.7559	11.4415	12.0661	11.1956	11.9569	M0ZXT6	Uncharacterized protein
15.1122	15.4194	15.4188	14.5408	14.6277	14.6132	14.5129	14.6329	15.1341	14.7907	15.1669	15.5405	14.946	15.2112	14.891	15.8221	M0ZYU5	Oligopeptide transporter
10.1288	10.1735	10.9876	10.5378	10.9802	13.4252	13.6106	13.149	13.2917	9.33452	13.3266	13.5842	13.6552	13.4284	13.3551	9.89046	M0ZZA3	Protein kinase 1b
12.3884	12.649	12.354	12.4234	12.8688	12.9816	13.2933	13.2694	12.122	12.1407	11.8528	12.1685	11.9226	11.9326	11.7314	11.8427	M1A1V7	Inorganic diphosphatase;Soluble inorganic pyrophosphatase PPA1
12.3884	12.649	12.354	12.4234	12.8688	12.9816	13.2933	13.2694	12.122	12.1407	11.8528	12.1685	11.9226	11.9326	11.7314	11.8427	Q43187	Inorganic diphosphatase;Soluble inorganic pyrophosphatase PPA1
10.1711	9.8428	11.0706	9.80782	11.3539	11.8191	11.8213	11.8543	10.898	10.6017	10.9107	10.7041	11.4751	11.4042	10.7571	10.9634	M1A2E4	GYF domain-containing protein
9.31073	9.63581	10.6172	10.261	11.3539	11.8191	11.8213	11.8543	10.3151	10.4109	10.7053	11.3433	11.4751	11.4042	10.5804	10.321	M1A2E5	GYF domain-containing protein
12.4385	12.7926	12.8173	12.8005	10.1752	11.9183	9.1828	9.50326	12.5033	10.9716	12.3015	10.2202	12.3868	12.5744	12.3888	12.8978	M1A3Y0	MTD1
12.4385	12.7926	12.8173	12.8005	9.9713	11.9183	10.7951	10.3285	12.5033	10.5833	12.3015	10.3334	12.3868	12.5744	10.7362	12.8978	M1A3Y1	MTD1
14.1775	14.4426	14.3914	13.8877	11.9526	12.6442	13.4271	12.8513	12.9838	13.1572	13.7494	14.0287	8.32476	10.0015	10.8675	10.0829	M1A3Z9	Signal transducer
14.0084	14.2518	14.3434	14.2634	13.3774	13.7772	13.65	13.3402	12.9376	13.7043	13.7431	13.3162	14.7935	14.6455	14.7239	14.982	M1A4G9	Uncharacterized protein
14.8458	15.1406	15.3664	15.277	15.1939	15.7861	15.8028	15.9138	14.885	15.2445	14.7931	15.3987	15.0373	15.1962	15.0997	15.2856	M1A4K3	Uncharacterized protein
12.4222	12.7093	13.0111	12.8501	13.1663	13.5401	13.7421	13.659	13.5039	13.7578	13.6515	13.8224	14.1327	14.1343	13.9748	14.2573	M1A4M4	Synaptotagmin
12.4222	12.7093	13.0111	12.8501	13.1663	13.5401	13.7421	13.659	13.5039	13.7578	13.6515	13.8224	14.1327	14.1343	13.9748	14.2573	M1A4M5	Synaptotagmin
12.4222	12.7093	13.0111	12.8501	13.1663	13.5401	13.7421	13.659	13.5039	13.7578	13.6515	13.8224	14.1327	14.1343	13.9748	14.2573	M1A4M6	Synaptotagmin
10.1306	10.0521	15.6697	9.60291	15.0216	15.6529	15.4616	15.6445	15.6009	15.8686	15.7435	16.0793	16.1994	16.1762	16.2788	16.3617	M1A4R1	DNA-binding protein
10.921	11.0504	11.7476	9.27518	12.3819	12.6043	13.3489	13.202	10.8885	11.0882	11.4151	11.79	11.9512	12.0709	11.5617	11.7972	M1A691	Serine-threonine protein kinase, plant-type;Serine-threonine protein kinase, plant-type
10.921	11.0504	11.7476	9.27518	12.3819	12.6043	13.3489	13.202	10.8885	11.0882	11.4151	11.79	11.9512	12.0709	11.5617	11.7972	M1A692	Serine-threonine protein kinase, plant-type;Serine-threonine protein kinase, plant-type
16.8286	17.1017	17.1896	17.0366	16.1118	16.4356	16.5999	16.6681	17.4744	17.7699	17.4481	17.5974	17.4785	17.6548	17.6249	17.6508	M1A6H3	Chlorophyll a-b binding protein, chloroplastic
12.0638	12.2488	12.6626	11.9708	12.6893	13.0696	13.5282	13.2686	12.2848	12.443	12.5435	12.4875	12.2066	12.8445	12.1328	12.5844	M1A714	Multidrug resistance-associated protein 2, 6 (Mrp2, 6), abc-transoprter;Multidrug resistance-associated protein 2, 6 (Mrp2, 6), abc-transoprter
12.0638	12.2488	12.6626	11.9708	12.6893	13.0696	13.5282	13.2686	12.2848	12.443	12.5435	12.4875	12.2066	12.8445	12.1328	12.5844	M1A714	Multidrug resistance-associated protein 2, 6 (Mrp2, 6), abc-transoprter;Multidrug resistance-associated protein 2, 6 (Mrp2, 6), abc-transoprter
12.0638	12.2488	12.6626	11.9708	12.6893	13.0696	13.5282	13.2686	12.2848	12.443	12.5435	12.4875	12.2066	12.8445	12.1328	12.5844	M1A715	Multidrug resistance-associated protein 2, 6 (Mrp2, 6), abc-transoprter;Multidrug resistance-associated protein 2, 6 (Mrp2, 6), abc-transoprter
12.0638	12.2488	12.6626	11.9708	12.6893	13.0696	13.5282	13.2686	12.2848	12.443	12.5435	12.4875	12.2066	12.8445	12.1328	12.5844	M1A715	Multidrug resistance-associated protein 2, 6 (Mrp2, 6), abc-transoprter;Multidrug resistance-associated protein 2, 6 (Mrp2, 6), abc-transoprter
13.4826	11.9021	9.56818	10.9455	13.9694	14.6248	14.8419	14.6927	11.0866	11.3257	8.98563	10.7949	9.7618	9.94993	10.7556	11.0589	M1A792	Uncharacterized protein
13.4826	10.9227	10.5675	8.98079	13.9694	14.6248	14.8419	14.6927	9.75861	9.89733	10.6919	11.5062	9.55353	10.5821	11.1454	9.7179	M1A793	Uncharacterized protein
12.5557	12.0269	12.7116	12.4182	11.8224	10.0663	11.1904	11.723	13.2317	13.2294	13.095	13.0718	13.2349	13.3138	13.4649	13.2432	M1A8C0	Serine/threonine protein kinase
12.5557	12.0269	12.7116	12.4182	11.8224	10.8903	11.0216	10.454	13.2317	13.2294	13.095	13.0718	13.2349	13.3138	13.4649	13.2432	M1A8C3	Serine/threonine protein kinase
12.5557	12.0269	12.7116	12.4182	11.8224	9.77882	10.797	9.71223	13.2317	13.2294	13.095	13.0718	13.2349	13.3138	13.4649	13.2432	M1A8C4	Serine/threonine protein kinase
16.7397	16.9512	17.0381	16.92	16.8976	17.4186	17.4221	17.4443	16.7624	17.1132	16.9349	17.1108	17.0721	17.2196	17.0228	17.1948	M1A8G3	Uncharacterized protein
18.7594	19.2619	19.5711	19.117	19.9464	20.4158	21.3173	20.8115	17.7727	18.2786	18.0909	18.4943	19.2416	19.344	18.9344	19.4062	M1A8M8	FLZ-type domain-containing protein
15.5787	15.7682	15.9878	15.8613	16.4424	16.7262	16.9395	16.8915	15.7414	16.1091	15.9251	16.1037	15.5971	15.6941	15.4892	15.5843	M1A8M8	FLZ-type domain-containing protein
10.2189	10.0137	9.60531	8.56312	11.7337	16.3672	16.5725	16.5911	16.2067	16.2712	10.0436	16.5419	8.69353	11.0028	10.8803	11.4975	M1A9A3	Protein OBERON 4
11.23	11.7206	10.8058	9.78687	10.3934	16.3672	16.5725	16.5911	16.2067	16.2712	11.2334	16.5419	10.6677	11.7523	11.0117	10.8255	M1A9A4	Protein OBERON 4
12.5748	12.6262	13.334	12.4539	13.2107	13.68	13.9142	13.5437	12.2754	12.3557	12.6131	12.6707	11.045	11.7163	11.9082	11.5165	M1AAA2	Integral membrane single C2 domain protein
14.5772	14.8374	14.8034	14.7782	13.8002	14.2823	14.5556	14.3259	14.4201	14.8203	14.6161	15.085	14.5619	10.6967	11.2854	14.8347	M1AAV9	ADP-ribosylation factor GTPase-activating protein AGD14
14.5772	14.8374	14.8034	14.7782	13.8002	14.2823	14.5556	14.3259	14.4201	14.8203	14.6161	15.085	14.5619	9.96461	10.5886	14.8347	M1AAW0	ADP-ribosylation factor GTPase-activating protein AGD14
18.3476	18.578	18.61	18.272	17.5318	17.9714	18.1478	18.1122	17.7217	17.8863	17.7677	18.0379	17.7842	17.8156	17.7305	17.8646	M1AB97	H/ACA ribonucleoprotein complex subunit 4
18.3476	18.578	18.61	18.272	17.5318	17.9714	18.1478	18.1122	17.7217	17.8863	17.7677	18.0379	17.7842	17.8156	17.7305	17.8646	M1AB98	H/ACA ribonucleoprotein complex subunit 4
16.2503	16.4985	16.3405	16.4308	15.6492	15.9305	16.0243	15.8868	16.3239	16.6312	16.4985	16.8336	17.3446	17.1802	17.1291	17.2028	M1ABI2	Extensin
16.8493	16.8017	16.9791	16.9162	16.6982	16.7098	16.7982	16.7859	16.9509	17.2033	16.9449	17.1779	17.3658	17.306	17.1071	17.1654	M1ABI2	Extensin
17.0007	16.9305	17.0573	16.8291	16.0379	16.2177	16.8466	16.6765	17.2463	17.5308	17.3908	17.6398	18.2355	18.0401	17.9225	18.2093	M1ABI2	Extensin
9.48586	10.9261	10.639	10.6647	13.7168	13.3143	13.224	13.621	12.7833	13.8281	11.837	13.8566	13.2787	14.0267	10.636	14.0756	M1ABI2	Extensin
11.6794	11.8112	11.842	11.2877	10.2609	11.1864	10.2043	11.3104	11.2863	11.8897	11.5361	12.1352	11.2019	11.5139	11.3373	11.5695	M1AE01	26S proteasome regulatory subunit RPN11
17.3562	17.4953	17.2909	17.5361	16.1306	16.6221	16.8382	16.7353	17.9834	18.1402	18.1492	18.6382	17.1004	17.1408	16.9404	16.5151	M1AE81	Major intrinsic protein 2
14.6585	14.7071	14.8595	14.6668	8.87131	14.0308	10.4004	11.4031	10.4255	14.5085	14.2226	14.442	13.8504	11.1326	11.0664	13.945	M1AF17	Chlorophyll a-b binding protein, chloroplastic;Chlorophyll a-b binding protein, chloroplastic;Chlorophyll a-b binding protein, chloroplastic
14.6585	14.7071	14.8595	14.6668	10.1962	14.0308	10.8484	9.56821	9.61803	14.5085	14.2226	14.442	13.8504	9.55411	9.99983	13.945	M1DQW0	Chlorophyll a-b binding protein, chloroplastic;Chlorophyll a-b binding protein, chloroplastic;Chlorophyll a-b binding protein, chloroplastic
14.6585	14.7071	14.8595	14.6668	9.86735	14.0308	9.41925	11.0976	10.7003	14.5085	14.2226	14.442	13.8504	9.85483	10.409	13.945	Q41421	Chlorophyll a-b binding protein, chloroplastic;Chlorophyll a-b binding protein, chloroplastic;Chlorophyll a-b binding protein, chloroplastic
12.9654	13.2458	13.4616	13.405	13.8099	14.0406	14.2141	14.1274	13.6296	13.8861	13.8181	13.9185	13.6579	13.7444	13.5219	13.6414	M1AF43	RNA binding protein
12.1977	12.4176	12.5074	12.3628	12.6261	12.8799	12.8866	13.0332	12.671	12.8852	13.03	12.8141	13.0737	13.1062	13.0637	13.2583	M1AF43	RNA binding protein
18.7857	19.2221	19.0477	19.8133	20.896	21.2796	20.2768	21.344	18.8641	19.7333	10.1434	19.1483	19.1767	19.6097	11.4547	11.4928	M1AFT5	Chlorophyll a-b binding protein, chloroplastic
10.8319	11.2625	10.8022	10.1571	11.9312	12.2772	12.3595	12.2947	12.2539	12.6802	12.2111	12.5794	12.5838	12.7799	12.4868	12.7493	M1AGP7	WPP domain-interacting protein 2
10.7245	11.2625	11.7722	10.8561	11.9312	12.2772	12.3595	12.2947	12.2539	12.6802	12.2111	12.5794	12.5838	12.7799	12.4868	12.7493	M1AGP8	WPP domain-interacting protein 2
14.0897	14.3607	14.5213	14.4742	14.7022	15.0468	15.1472	15.0486	13.6165	14.061	13.7297	14.0173	14.5011	14.4763	14.5583	14.693	M1AHP3	Eukaryotic translation initiation factor 3 subunit A
13.2693	13.559	13.732	13.4531	13.7483	13.7082	14.0969	14.1114	13.4559	13.7901	13.407	13.5481	13.6531	13.5104	13.3486	13.7112	M1AHZ8	Glutaredoxin-dependent peroxiredoxin
14.1199	14.2586	14.3688	14.303	14.509	14.7379	14.8468	14.941	14.5315	14.6911	14.5722	14.7938	14.2696	14.3642	14.1217	14.2641	M1AIY2	Uncharacterized protein
13.637	13.9194	13.9034	13.9068	14.0268	14.1738	14.4114	14.4782	13.5633	13.8628	13.6741	13.7474	13.4941	13.7205	13.4911	13.6758	M1AJ68	Alkaline/neutral invertase
14.3008	14.6215	14.5359	14.4561	12.6337	13.4528	14.136	13.5002	14.2419	13.5424	14.363	14.6354	13.5195	11.4047	9.3272	13.7897	M1AKW9	Uncharacterized protein
13.294	13.5911	13.2797	13.4019	11.4592	12.1409	10.1328	10.7105	13.0274	13.3928	13.1691	13.4145	10.4522	10.1357	10.2377	10.3183	M1AKX0	Uncharacterized protein
11.8468	11.9277	12.4173	11.9881	12.8057	12.9744	12.8694	13.0869	10.4712	11.0166	10.4975	11.1824	12.4276	12.7119	12.5008	12.7206	M1AL12	Purine transporter
16.3109	16.3455	16.445	16.4149	16.6529	16.8697	16.8578	16.9415	16.6458	16.5926	16.6505	16.5741	17.1772	17.1344	17.0231	17.2551	M1ALF9	Uncharacterized protein
9.4856	10.3663	10.1081	9.57653	10.4977	11.331	11.306	10.4318	10.1929	10.1547	10.3268	11.2433	11.3802	11.4851	11.1969	11.5696	M1ALM1	Zinc finger protein
13.8437	14.365	14.1186	14.8685	15.3466	15.6401	16.0115	14.8322	15.3775	16.0727	15.7655	16.1073	15.6329	16.0371	15.5583	15.2444	M1ALZ1	Alkaline/neutral invertase
13.771	14.0117	14.0054	13.8956	14.0617	14.6331	14.5977	14.5817	14.4166	14.6579	13.5694	13.9111	14.03	14.8197	14.7974	14.6131	M1ALZ1	Alkaline/neutral invertase
15.7688	16.1071	16.0776	16.0342	14.7925	15.3591	15.6234	15.6344	9.88075	15.5442	15.3706	15.5706	14.7483	11.019	10.7072	10.2074	M1AM10	Lupus la ribonucleoprotein
15.7688	16.1071	16.0776	16.0342	14.7925	15.3591	15.6234	15.6344	12.1604	15.5442	15.3706	15.5706	14.7483	10.5829	10.5632	10.6554	M1AM11	Lupus la ribonucleoprotein
14.5557	14.4589	14.5453	14.5925	14.6724	14.8915	15.1157	14.8845	14.148	14.2148	14.3768	14.2719	14.0092	14.1945	13.978	14.1648	M1AM81	Serine/threonine-protein kinase cx32
14.5557	14.4589	14.5453	14.5925	14.6724	14.8915	15.1157	14.8845	14.148	14.2148	14.3768	14.2719	14.0092	14.1945	13.978	14.1648	M1AM82	Serine/threonine-protein kinase cx32
18.6193	18.9571	18.9802	18.1418	19.1796	19.5242	19.5762	19.5927	19.2419	19.3665	19.2305	19.4702	19.9353	20.1523	19.5589	19.9775	M1AM98	Hexose transporter
19.0098	19.2575	19.5496	19.5127	19.7567	20.3434	20.0443	20.1201	19.6435	19.9255	19.6373	19.7654	20.1188	20.2756	20.0214	20.1245	M1AM98	Hexose transporter
16.0349	16.4201	16.5424	16.4011	16.9837	17.4777	17.7025	17.7083	16.364	16.7475	16.5786	16.7576	18.5858	18.7721	18.4019	18.8364	M1AM98	Hexose transporter
15.8755	16.4121	16.4486	16.0836	16.8042	17.5882	17.5519	17.6025	15.9858	16.2394	16.0326	16.3139	16.9989	17.2486	16.8614	13.0616	M1AM98	Hexose transporter
13.3713	14.0755	14.1599	14.265	14.6622	15.254	15.3535	15.3558	14.007	14.4463	14.0017	14.2784	14.7468	14.804	14.4531	14.9395	M1AM98	Hexose transporter
9.74343	11.1604	10.3726	10.2185	12.6325	13.2431	11.6096	13.6993	9.83936	10.943	10.3098	11.174	13.0921	13.2638	12.6544	13.0728	M1AMJ3	DNA double-strand break repair rad50 ATPase
12.7869	12.8494	13.2902	12.9211	13.1667	13.351	13.6876	13.6623	12.7498	12.6941	12.6216	12.9675	12.7873	12.6764	12.6657	12.7174	M1APN1	PWWP domain-containing protein
12.931	13.2537	13.3284	12.9733	12.5076	12.8978	12.609	12.9581	13.393	13.9807	13.8061	13.9475	13.3713	13.6097	13.615	13.7377	M1AQ70	Calcium-dependent protein kinase 8
15.2594	15.6467	15.6988	15.6214	15.7746	16.2227	16.3344	16.073	15.028	15.3755	15.3831	15.2835	15.8239	15.8823	15.75	15.9982	M1AQJ9	GYF domain-containing protein
15.2594	15.6467	15.6988	15.6214	15.7746	16.2227	16.3344	16.073	15.028	15.3755	15.3831	15.2835	15.8239	15.8823	15.75	15.9982	M1AQK0	GYF domain-containing protein
14.3056	14.5041	14.558	14.3573	14.5511	14.8724	15.014	15.0393	14.3874	14.753	14.413	15.0345	14.8315	14.8871	14.8098	15.098	M1AQJ9	GYF domain-containing protein
14.3056	14.5041	14.558	14.3573	14.5511	14.8724	15.014	15.0393	14.3874	14.753	14.413	15.0345	14.8315	14.8871	14.8098	15.098	M1AQK0	GYF domain-containing protein
16.4508	16.9919	16.5132	16.5518	15.9717	16.3642	16.3478	16.1308	16.1159	16.0868	15.8023	16.0696	15.5085	15.3999	15.5109	15.3889	M1ASB9	Eukaryotic translation initiation factor 3 subunit
16.2707	16.5576	16.5386	16.6735	10.2721	9.92041	10.0748	16.3354	11.9238	16.3106	16.3597	16.3979	9.74931	16.587	16.1119	16.3574	M1ASB9	Eukaryotic translation initiation factor 3 subunit
11.8293	12.7595	12.7134	9.99663	9.58287	10.3208	10.237	9.95834	12.5348	12.7091	13.1187	13.0241	14.9604	14.6601	14.5075	14.815	M1ASB9	Eukaryotic translation initiation factor 3 subunit
11.8293	12.7595	12.7134	9.99663	9.58287	10.3208	10.237	9.95834	12.5348	12.7091	13.1187	13.0241	14.9604	14.6601	14.5075	14.815	M1ASB9	Eukaryotic translation initiation factor 3 subunit
13.1643	13.2418	13.1587	13.2486	12.9509	12.9442	12.7346	12.6013	13.4877	13.4441	13.7278	13.3629	13.605	13.4965	13.4053	13.0474	M1ASG0	Arginine/serine-rich protein
13.1643	13.2418	13.1587	13.2486	12.9509	12.9442	12.7346	12.6013	13.4877	13.4441	13.7278	13.3629	13.605	13.4965	13.4053	13.0474	M1ASG1	Arginine/serine-rich protein
10.7866	10.3875	10.5672	10.0742	11.3792	11.4632	11.0019	10.5965	12.6778	10.5452	12.8025	13.0111	11.0605	9.26968	10.913	9.991	M1ASZ3	ZYRO0G14608p
12.3293	12.6079	12.9516	12.2857	12.0023	12.3507	11.3042	11.8123	12.5564	12.7794	12.3306	12.944	12.905	12.9333	12.323	12.9082	M1ATR6	Amino acid transporter
12.3293	12.6079	12.9516	12.2857	12.0023	12.3507	11.3042	11.8123	12.5564	12.7794	12.3306	12.944	12.905	12.9333	12.323	12.9082	M1ATR7	Amino acid transporter
13.2375	13.6111	13.6447	13.3403	14.1551	14.825	15.0206	14.9664	13.3955	13.7116	13.4577	13.9557	13.6292	13.9264	13.4405	13.9116	M1AUI7	MAP kinase phosphatase 1
13.2375	13.6111	13.6447	13.3403	14.1551	14.825	15.0206	14.9664	13.3955	13.7116	13.4577	13.9557	13.6292	13.9264	13.4405	13.9116	M1AUI8	MAP kinase phosphatase 1
11.7681	12.0877	12.3514	12.0935	10.8322	10.8763	9.80374	12.0715	10.6098	12.3539	11.0819	11.5317	13.3816	9.44654	11.0924	10.0789	M1AUR8	Vacuolar cation/proton exchanger
11.7738	10.0975	12.4745	11.0059	12.6204	12.6335	12.3565	13.7357	11.6637	10.4318	12.0278	10.5464	13.2	13.2977	14.046	14.5083	M1AWH4	Oligopeptide transporter OPT family
11.4518	9.31351	12.0111	11.2469	14.9432	15.7687	16.3355	14.0489	10.5481	14.4337	10.5122	11.5069	13.0539	13.6301	12.841	13.232	M1AXB5	Sodium/calcium exchanger family protein
9.45425	11.6291	10.6923	9.77712	12.587	11.9069	11.6836	13.284	12.2267	12.7655	12.6155	12.9296	13.2326	13.1197	13.148	13.3732	M1AY92	Microtubule-associated protein futsch
15.5529	15.8454	15.882	16.0203	15.0972	15.606	15.5018	15.3579	14.9075	15.3841	15.3076	15.2909	15.4702	15.4692	15.3827	15.4298	M1AYB5	TPX2 domain-containing protein
14.9251	15.1777	15.2811	15.3407	14.3284	14.791	14.8322	14.8925	14.5634	14.8843	14.6899	14.9701	14.4399	14.3909	14.2999	14.3129	M1AZJ6	Receptor protein kinase
14.0943	14.2481	14.3388	14.317	13.1739	13.9408	13.6204	13.7834	12.596	12.8214	12.8249	12.67	12.695	12.9803	12.5742	12.8046	M1B1J1	Uncharacterized protein
14.0498	14.0048	14.1505	14.2517	9.54721	9.00869	10.4855	10.6651	14.2063	14.2851	9.65016	14.6246	14.4324	14.3587	14.1496	14.299	M1B1P6	Integrin-linked protein kinase
14.0498	14.0048	14.1505	14.2517	11.0241	10.1591	10.6644	9.73423	14.2063	14.2851	10.0325	14.6246	14.4324	14.3587	14.1496	14.299	M1B1P7	Integrin-linked protein kinase
13.5193	13.7802	13.5437	13.2623	12.7312	12.9807	13.3332	13.24	13.0298	13.332	13.5561	13.5535	13.6023	13.5053	13.5104	13.762	M1B203	Marker Xucw84
13.5193	13.7802	13.5437	13.2623	12.7312	12.9807	13.3332	13.24	13.0298	13.332	13.5561	13.5535	13.6023	13.5053	13.5104	13.762	M1B204	Marker Xucw84
17.6102	17.9719	18.0574	17.8969	16.6727	17.3146	17.6655	17.4684	17.3939	17.8179	17.8252	18.2058	17.8487	17.7715	17.5031	17.9559	M1B3Z5	Protein TOPLESS
13.9162	14.1629	14.4432	14.0898	14.3484	14.8256	15.1108	15.0016	13.9442	14.2186	14.2394	14.554	14.3504	14.4192	14.3107	14.3728	M1B452	Respiratory burst oxidase homolog protein C
13.9162	14.1629	14.4432	14.0898	14.3484	14.8256	15.1108	15.0016	13.9442	14.2186	14.2394	14.554	14.3504	14.4192	14.3107	14.3728	Q2HXL0	Respiratory burst oxidase homolog protein C
14.337	14.388	13.8789	14.2075	12.7986	13.504	13.2797	12.7882	14.09	14.1403	14.0439	14.2007	13.568	13.9843	13.7234	13.552	M1B485	ATP binding protein
10.9181	11.2578	11.5445	11.3391	12.0008	11.519	12.083	12.2961	13.701	13.5197	13.8756	14.3211	14.3674	14.5015	14.2037	14.4522	M1B498	Nucleoporin
16.4078	16.5481	16.7281	16.4427	16.6267	16.8173	16.9647	17.0092	17.2552	17.5462	17.2888	17.6353	17.6363	17.6018	17.4138	17.5502	M1B4M9	Splicing factor
16.4078	16.5481	16.7281	16.4427	16.6267	16.8173	16.9647	17.0092	17.2552	17.5462	17.2888	17.6353	17.6363	17.6018	17.4138	17.5502	M1B4M9	Splicing factor
16.4078	16.5481	16.7281	16.4427	16.6267	16.8173	16.9647	17.0092	17.2552	17.5462	17.2888	17.6353	17.6363	17.6018	17.4138	17.5502	M1B4N0	Splicing factor
16.4078	16.5481	16.7281	16.4427	16.6267	16.8173	16.9647	17.0092	17.2552	17.5462	17.2888	17.6353	17.6363	17.6018	17.4138	17.5502	M1B4N0	Splicing factor
16.4078	16.5481	16.7281	16.4427	16.6267	16.8173	16.9647	17.0092	17.2552	17.5462	17.2888	17.6353	17.6363	17.6018	17.4138	17.5502	M1B4N1	Splicing factor
16.4078	16.5481	16.7281	16.4427	16.6267	16.8173	16.9647	17.0092	17.2552	17.5462	17.2888	17.6353	17.6363	17.6018	17.4138	17.5502	M1B4N1	Splicing factor
16.4078	16.5481	16.7281	16.4427	16.6267	16.8173	16.9647	17.0092	17.2552	17.5462	17.2888	17.6353	17.6363	17.6018	17.4138	17.5502	M1B4N2	Splicing factor
16.4078	16.5481	16.7281	16.4427	16.6267	16.8173	16.9647	17.0092	17.2552	17.5462	17.2888	17.6353	17.6363	17.6018	17.4138	17.5502	M1B4N2	Splicing factor
20.6164	20.902	16.277	19.9015	15.5192	15.3249	15.4158	15.0115	20.9496	20.6088	20.5653	20.6089	20.3288	20.9283	20.757	20.9697	M1B583	Heat shock cognate protein 80
11.3592	11.2785	11.4215	10.9653	10.3076	9.85181	10.7071	10.4485	10.7899	10.6786	10.8429	10.3126	9.1434	10.884	11.8051	10.658	M1B5I2	ATP-dependent Clp protease ATP-binding subunit clpA homolog CD4B, chloroplastic
10.99	9.02833	10.9432	8.63712	13.129	13.323	11.1492	13.5488	10.3669	11.7858	9.88875	10.493	10.6572	10.4003	10.0835	11.2068	M1B6B9	Ulp1 protease family, C-terminal catalytic domain containing protein;Ulp1 protease family, C-terminal catalytic domain containing protein
11.0034	10.3543	10.3967	10.3279	13.129	13.323	10.7481	13.5488	9.52225	11.0913	10.2636	9.47673	10.9622	10.6827	9.85693	10.9478	M1B6C0	Ulp1 protease family, C-terminal catalytic domain containing protein;Ulp1 protease family, C-terminal catalytic domain containing protein
14.3051	14.3725	14.5456	14.5061	13.3985	13.8421	13.992	13.8828	13.3355	13.6369	13.4062	13.9679	13.1297	12.9505	12.8743	13.1268	M1B8C7	CBS domain containing protein
16.5479	16.9242	16.5937	16.9594	16.8886	17.5995	17.3658	17.743	18.3863	18.492	18.1917	18.6663	20.0848	20.2667	19.9759	20.2289	M1B8U0	Phosphoenolpyruvate carboxylase
16.5479	16.9242	16.5937	16.9594	16.8886	17.5995	17.3658	17.743	18.3863	18.492	18.1917	18.6663	20.0848	20.2667	19.9759	20.2289	M1BWV7	Phosphoenolpyruvate carboxylase
16.5479	16.9242	16.5937	16.9594	16.8886	17.5995	17.3658	17.743	18.3863	18.492	18.1917	18.6663	20.0848	20.2667	19.9759	20.2289	P29196	Phosphoenolpyruvate carboxylase
16.468	16.7727	16.9459	16.3694	17.1106	17.3484	17.5027	17.507	16.9622	17.2846	16.8923	17.1583	17.778	18.0174	17.7758	17.9428	M1B927	Sugar transporter
16.468	16.7727	16.9459	16.3694	17.1106	17.3484	17.5027	17.507	16.9622	17.2846	16.8923	17.1583	17.778	18.0174	17.7758	17.9428	M1B928	Sugar transporter
12.6416	12.4514	12.7108	12.3226	11.3145	11.8617	11.9624	11.7634	12.4168	12.6352	12.4722	12.9308	12.6803	12.0944	12.1499	12.6391	M1BBJ0	Sinapyl alcohol dehydrogenase 2
12.6416	12.4514	12.7108	12.3226	11.3145	11.8617	11.9624	11.7634	12.4168	12.6352	12.4722	12.9308	12.6803	12.0944	12.1499	12.6391	M1BBJ1	Sinapyl alcohol dehydrogenase 2
10.964	10.7028	10.3953	15.39	14.5158	15.2461	16.1048	15.5244	15.3875	15.7568	15.8321	16.1347	15.8885	10.0217	15.7219	16.1459	M1BC39	Nucleic acid binding protein
14.5923	15.1273	15.0336	14.911	12.3156	14.2157	14.3262	13.461	14.0441	14.3608	14.1556	14.5225	12.9969	14.3005	13.856	14.3614	M1BDG0	Uncharacterized protein
14.5923	15.1273	15.0336	14.911	12.3156	14.2157	14.3262	13.461	14.0441	14.3608	14.1556	14.5225	12.9969	14.3005	13.856	14.3614	M1BDG1	Uncharacterized protein
14.5923	15.1273	15.0336	14.911	12.3156	14.2157	14.3262	13.461	14.0441	14.3608	14.1556	14.5225	12.9969	14.3005	13.856	14.3614	M1BDG2	Uncharacterized protein
15.2513	15.4783	15.4773	15.2958	14.7384	15.1163	15.1422	15.1486	14.1664	14.7327	14.3811	14.7814	14.268	14.5046	14.3675	14.6073	M1BDU8	Transcription factor RF2b
15.2513	15.4783	15.4773	15.2958	14.7384	15.1163	15.1422	15.1486	14.1664	14.7327	14.3811	14.7814	14.268	14.5046	14.3675	14.6073	M1CN16	Transcription factor RF2b
9.70644	10.9766	10.8774	9.77367	10.9384	11.468	12.1724	12.0752	10.4327	9.30168	11.1013	10.5873	11.2028	11.0074	11.1819	11.6667	M1BE97	Syntaxin
9.70644	10.9766	10.8774	9.77367	10.9384	11.468	12.1724	12.0752	10.4327	9.30168	11.1721	10.5873	11.2028	11.0074	11.1819	11.6667	M1BE98	Syntaxin
9.70644	10.9766	10.8774	9.77367	10.9384	11.468	12.1724	12.0752	10.4327	9.30168	10.9404	10.5873	11.2028	11.0074	11.1819	11.6667	M1BE99	Syntaxin
9.70644	10.9766	10.8774	9.77367	10.9384	11.468	12.1724	12.0752	10.4327	9.30168	10.0707	10.5873	11.2028	11.0074	11.1819	11.6667	M1D7S2	Syntaxin
13.4823	13.6797	13.4778	13.2192	13.9621	14.3687	14.0719	13.6776	14.8985	14.7005	14.8478	15.038	15.3813	15.3766	15.3159	15.6222	M1BEW3	Glycine-rich RNA-binding protein
13.4823	13.6797	13.4778	13.2192	13.9621	14.3687	14.0719	13.6776	14.8985	14.7005	14.8478	15.038	15.3813	15.3766	15.3159	15.6222	M1BEW4	Glycine-rich RNA-binding protein
13.4823	13.6797	13.4778	13.2192	13.9621	14.3687	14.0719	13.6776	14.8985	14.7005	14.8478	15.038	15.3813	15.3766	15.3159	15.6222	M1BEW5	Glycine-rich RNA-binding protein
14.1836	14.5237	14.5398	14.4224	14.9261	15.2961	15.0952	15.4026	14.7751	14.8317	14.7299	14.7996	16.0927	16.2827	16.1104	16.3862	M1BFL8	Nodulin family protein
14.1836	14.5237	14.5398	14.4224	14.9261	15.2961	15.0952	15.4026	14.7751	14.8317	14.7299	14.7996	16.0927	16.2827	16.1104	16.3862	M1BFL9	Nodulin family protein
12.6673	12.7004	12.7796	12.6771	12.2591	12.5171	12.4893	12.5079	12.9904	12.8351	12.4506	13.1204	13.2403	13.1411	13.2324	13.4428	M1BGN6	NOI
13.3403	13.5326	13.7006	13.6844	11.7389	12.7267	12.1046	12.7706	13.5508	13.9903	11.8097	12.6832	13.3982	13.0355	12.6443	13.455	M1BGW4	Ankyrin
14.8565	14.9235	15.1432	14.7755	14.0381	10.0037	10.0346	9.57036	15.1856	15.408	15.2572	15.5357	10.115	15.3953	15.2035	15.3362	M1BH80	p-glycoprotein
15.0853	15.0632	15.1806	15.3803	10.1657	15.1741	10.0146	10.8817	9.74535	15.0705	11.2842	11.4607	10.4594	11.7956	11.1861	11.3327	M1BHH6	Calmodulin binding protein
12.9364	13.5869	13.3528	13.2582	13.5587	14.1092	14.1447	14.1569	13.3114	13.8082	13.6245	13.6421	13.5782	13.8488	13.7771	14.1354	M1BHI6	SCP domain-containing protein;Tho1_MOS11_C domain-containing protein
12.9364	13.5869	13.3528	13.2582	13.5587	14.1092	14.1447	14.1569	13.3114	13.8082	13.6245	13.6421	13.5782	13.8488	13.7771	14.1354	M1BHI7	SCP domain-containing protein;Tho1_MOS11_C domain-containing protein
12.2033	12.8165	12.7581	12.2232	13.1469	13.5415	13.4578	13.5149	13.0915	13.5451	13.3622	13.4764	13.6745	13.7331	13.3365	13.6194	M1BJ21	Poly(RC)-binding protein
10.2366	10.6262	9.2421	8.74551	11.3166	12.6585	11.8837	12.819	11.5205	11.9643	11.3517	10.8271	13.3476	13.3013	10.8923	12.5003	M1BK68	ATP citrate synthase
10.4777	9.95203	10.8086	10.0293	11.5693	12.0718	10.5156	12.2997	11.1301	10.5611	10.7014	10.807	10.5617	12.8919	11.1381	10.9583	M1BK68	ATP citrate synthase
11.2074	11.4701	10.434	11.1414	9.7964	9.61357	10.9085	10.0972	11.0209	11.0478	10.7727	10.3313	10.1312	11.1715	11.0141	10.9724	M1BK86	Pre-mRNA splicing factor
13.0532	13.3998	13.316	13.1174	9.65481	11.2592	10.3615	11.1837	12.0385	11.247	13.0441	11.348	10.3514	10.8461	12.7829	13.1435	M1BKX7	G-Box binding protein 2
14.8292	14.9495	15.0429	14.9724	15.1572	15.5955	16.0871	15.9824	14.0334	14.4716	14.3862	14.5268	14.4189	14.4441	14.1389	14.4253	M1BLS2	Amino acid transporter
15.7054	16.2158	16.2527	15.9101	16.6235	17.3818	17.3538	17.3988	15.8185	16.0765	15.8583	16.108	16.8337	17.079	16.691	11.8388	M1BLV2	Sugar transporter
14.5992	14.9272	13.1358	13.3349	11.8117	9.76686	10.7142	9.84819	14.6542	14.2137	14.4829	14.9823	15.0054	14.8214	14.9614	15.5386	M1BLY5	High mobility group protein 2 HMG2
14.2911	14.7035	14.5731	14.0306	13.4255	13.9377	14.0679	14.0298	15.1659	15.3562	15.1629	15.4744	14.6671	14.8332	14.7368	14.8493	M1BNH8	Ribulose bisphosphate carboxylase/oxygenase activase, chloroplastic
12.7962	13.1937	13.2603	13.0706	10.5745	9.1011	10.2398	10.3701	13.5228	14.1818	14.0599	14.48	13.9707	14.008	13.7534	14.1772	M1BNS4	BRI1-KD interacting protein 130
12.7962	13.1937	13.2603	13.0706	10.1491	10.1584	9.32863	10.4798	13.5228	14.1818	14.0599	14.48	13.9707	14.008	13.7534	14.1772	M1BNS5	BRI1-KD interacting protein 130
10.3474	11.2503	12.0413	11.5449	11.9243	12.6721	13.1538	12.8968	10.6954	11.899	10.5175	12.0639	11.2217	10.4935	9.96551	11.9666	M1BNZ3	Thiamine thiazole synthase, chloroplastic
14.3071	14.6129	14.6738	14.4429	12.8515	13.1923	11.1754	13.3263	14.1589	14.6603	14.3792	14.5256	13.5127	12.4294	13.7544	13.5982	M1BPZ2	Chlorophyll a-b binding protein, chloroplastic
17.2586	17.3772	17.4657	17.5204	17.5421	17.8916	18.0157	17.9683	17.1094	17.382	17.2915	17.4581	17.0394	17.1324	16.9462	17.1091	M1BS76	RPM1 interacting protein 4 transcript 2
14.031	14.2481	14.2143	14.5254	13.8634	13.9347	13.6984	13.9321	13.8958	14.0641	13.9789	13.7441	14.0922	14.23	14.5704	14.289	M1BSX4	Uncharacterized protein
14.031	14.2481	14.2143	14.5254	13.8634	13.9347	13.6984	13.9321	13.8958	14.0641	13.9789	13.7441	14.0922	14.23	14.5704	14.289	M1BSX5	Uncharacterized protein
14.031	14.2481	14.2143	14.5254	13.8634	13.9347	13.6984	13.9321	13.8958	14.0641	13.9789	13.7441	14.0922	14.23	14.5704	14.289	M1BSX6	Uncharacterized protein
15.5681	15.7983	15.9298	15.9193	14.8678	15.4277	15.5036	15.53	15.867	16.2217	16.0547	16.3068	16.1316	16.2508	15.9369	16.2526	M1BSY1	S-acyltransferase
14.5067	14.3584	14.4031	14.231	13.0354	13.9219	13.8457	13.8218	14.2794	14.4789	14.3672	14.853	14.6644	14.7377	14.4812	14.801	M1BSY1	S-acyltransferase
12.62	11.7908	11.8422	11.8874	10.0312	11.5273	11.5963	9.57108	12.6442	13.0053	12.8659	13.6774	13.3067	12.0534	10.0981	12.3493	M1BSY1	S-acyltransferase
9.85995	10.3029	9.98364	9.56409	9.79834	9.24615	9.31735	8.94237	10.1169	10.774	10.7576	10.6681	11.2039	11.2049	10.7184	10.0036	M1BT61	Succinic semialdehyde reductase isofom1
16.4834	16.9544	17.2237	16.1841	17.0704	17.5926	18.0124	17.8499	16.763	17.0858	16.9751	17.3551	17.2546	17.4403	17.0456	17.3699	M1BU04	Inositol-1,4,5-triphosphate-5-phosphatase;Inositol-1,4,5-triphosphate-5-phosphatase;Inositol-1,4,5-triphosphate-5-phosphatase;Inositol-1,4,5-triphosphate-5-phosphatase;Inositol-1,4,5-triphosphate-5-phosphatase;Inositol-1,4,5-triphosphate-5-phosphatase;Inositol-1,4,5-triphosphate-5-phosphatase
16.4834	16.9544	17.2237	16.1841	17.0704	17.5926	18.0124	17.8499	16.763	17.0858	16.9751	17.3551	17.2546	17.4403	17.0456	17.3699	M1BU04	Inositol-1,4,5-triphosphate-5-phosphatase;Inositol-1,4,5-triphosphate-5-phosphatase;Inositol-1,4,5-triphosphate-5-phosphatase;Inositol-1,4,5-triphosphate-5-phosphatase;Inositol-1,4,5-triphosphate-5-phosphatase;Inositol-1,4,5-triphosphate-5-phosphatase;Inositol-1,4,5-triphosphate-5-phosphatase
16.4834	16.9544	17.2237	16.1841	17.0704	17.5926	18.0124	17.8499	16.763	17.0858	16.9751	17.3551	17.2546	17.4403	17.0456	17.3699	M1BU05	Inositol-1,4,5-triphosphate-5-phosphatase;Inositol-1,4,5-triphosphate-5-phosphatase;Inositol-1,4,5-triphosphate-5-phosphatase;Inositol-1,4,5-triphosphate-5-phosphatase;Inositol-1,4,5-triphosphate-5-phosphatase;Inositol-1,4,5-triphosphate-5-phosphatase;Inositol-1,4,5-triphosphate-5-phosphatase
16.4834	16.9544	17.2237	16.1841	17.0704	17.5926	18.0124	17.8499	16.763	17.0858	16.9751	17.3551	17.2546	17.4403	17.0456	17.3699	M1BU05	Inositol-1,4,5-triphosphate-5-phosphatase;Inositol-1,4,5-triphosphate-5-phosphatase;Inositol-1,4,5-triphosphate-5-phosphatase;Inositol-1,4,5-triphosphate-5-phosphatase;Inositol-1,4,5-triphosphate-5-phosphatase;Inositol-1,4,5-triphosphate-5-phosphatase;Inositol-1,4,5-triphosphate-5-phosphatase
16.4834	16.9544	17.2237	16.1841	17.0704	17.5926	18.0124	17.8499	16.763	17.0858	16.9751	17.3551	17.2546	17.4403	17.0456	17.3699	M1BU06	Inositol-1,4,5-triphosphate-5-phosphatase;Inositol-1,4,5-triphosphate-5-phosphatase;Inositol-1,4,5-triphosphate-5-phosphatase;Inositol-1,4,5-triphosphate-5-phosphatase;Inositol-1,4,5-triphosphate-5-phosphatase;Inositol-1,4,5-triphosphate-5-phosphatase;Inositol-1,4,5-triphosphate-5-phosphatase
16.4834	16.9544	17.2237	16.1841	17.0704	17.5926	18.0124	17.8499	16.763	17.0858	16.9751	17.3551	17.2546	17.4403	17.0456	17.3699	M1BU06	Inositol-1,4,5-triphosphate-5-phosphatase;Inositol-1,4,5-triphosphate-5-phosphatase;Inositol-1,4,5-triphosphate-5-phosphatase;Inositol-1,4,5-triphosphate-5-phosphatase;Inositol-1,4,5-triphosphate-5-phosphatase;Inositol-1,4,5-triphosphate-5-phosphatase;Inositol-1,4,5-triphosphate-5-phosphatase
16.4834	16.9544	17.2237	16.1841	17.0704	17.5926	18.0124	17.8499	16.763	17.0858	16.9751	17.3551	17.2546	17.4403	17.0456	17.3699	M1BU07	Inositol-1,4,5-triphosphate-5-phosphatase;Inositol-1,4,5-triphosphate-5-phosphatase;Inositol-1,4,5-triphosphate-5-phosphatase;Inositol-1,4,5-triphosphate-5-phosphatase;Inositol-1,4,5-triphosphate-5-phosphatase;Inositol-1,4,5-triphosphate-5-phosphatase;Inositol-1,4,5-triphosphate-5-phosphatase
16.4834	16.9544	17.2237	16.1841	17.0704	17.5926	18.0124	17.8499	16.763	17.0858	16.9751	17.3551	17.2546	17.4403	17.0456	17.3699	M1BU07	Inositol-1,4,5-triphosphate-5-phosphatase;Inositol-1,4,5-triphosphate-5-phosphatase;Inositol-1,4,5-triphosphate-5-phosphatase;Inositol-1,4,5-triphosphate-5-phosphatase;Inositol-1,4,5-triphosphate-5-phosphatase;Inositol-1,4,5-triphosphate-5-phosphatase;Inositol-1,4,5-triphosphate-5-phosphatase
16.4834	16.9544	17.2237	16.1841	17.0704	17.5926	18.0124	17.8499	16.763	17.0858	16.9751	17.3551	17.2546	17.4403	17.0456	17.3699	M1BU08	Inositol-1,4,5-triphosphate-5-phosphatase;Inositol-1,4,5-triphosphate-5-phosphatase;Inositol-1,4,5-triphosphate-5-phosphatase;Inositol-1,4,5-triphosphate-5-phosphatase;Inositol-1,4,5-triphosphate-5-phosphatase;Inositol-1,4,5-triphosphate-5-phosphatase;Inositol-1,4,5-triphosphate-5-phosphatase
16.4834	16.9544	17.2237	16.1841	17.0704	17.5926	18.0124	17.8499	16.763	17.0858	16.9751	17.3551	17.2546	17.4403	17.0456	17.3699	M1BU08	Inositol-1,4,5-triphosphate-5-phosphatase;Inositol-1,4,5-triphosphate-5-phosphatase;Inositol-1,4,5-triphosphate-5-phosphatase;Inositol-1,4,5-triphosphate-5-phosphatase;Inositol-1,4,5-triphosphate-5-phosphatase;Inositol-1,4,5-triphosphate-5-phosphatase;Inositol-1,4,5-triphosphate-5-phosphatase
16.4834	16.9544	17.2237	16.1841	17.0704	17.5926	18.0124	17.8499	16.763	17.0858	16.9751	17.3551	17.2546	17.4403	17.0456	17.3699	M1BU09	Inositol-1,4,5-triphosphate-5-phosphatase;Inositol-1,4,5-triphosphate-5-phosphatase;Inositol-1,4,5-triphosphate-5-phosphatase;Inositol-1,4,5-triphosphate-5-phosphatase;Inositol-1,4,5-triphosphate-5-phosphatase;Inositol-1,4,5-triphosphate-5-phosphatase;Inositol-1,4,5-triphosphate-5-phosphatase
16.4834	16.9544	17.2237	16.1841	17.0704	17.5926	18.0124	17.8499	16.763	17.0858	16.9751	17.3551	17.2546	17.4403	17.0456	17.3699	M1BU09	Inositol-1,4,5-triphosphate-5-phosphatase;Inositol-1,4,5-triphosphate-5-phosphatase;Inositol-1,4,5-triphosphate-5-phosphatase;Inositol-1,4,5-triphosphate-5-phosphatase;Inositol-1,4,5-triphosphate-5-phosphatase;Inositol-1,4,5-triphosphate-5-phosphatase;Inositol-1,4,5-triphosphate-5-phosphatase
16.4834	16.9544	17.2237	16.1841	17.0704	17.5926	18.0124	17.8499	16.763	17.0858	16.9751	17.3551	17.2546	17.4403	17.0456	17.3699	M1C8R7	Inositol-1,4,5-triphosphate-5-phosphatase;Inositol-1,4,5-triphosphate-5-phosphatase;Inositol-1,4,5-triphosphate-5-phosphatase;Inositol-1,4,5-triphosphate-5-phosphatase;Inositol-1,4,5-triphosphate-5-phosphatase;Inositol-1,4,5-triphosphate-5-phosphatase;Inositol-1,4,5-triphosphate-5-phosphatase
16.4834	16.9544	17.2237	16.1841	17.0704	17.5926	18.0124	17.8499	16.763	17.0858	16.9751	17.3551	17.2546	17.4403	17.0456	17.3699	M1C8R7	Inositol-1,4,5-triphosphate-5-phosphatase;Inositol-1,4,5-triphosphate-5-phosphatase;Inositol-1,4,5-triphosphate-5-phosphatase;Inositol-1,4,5-triphosphate-5-phosphatase;Inositol-1,4,5-triphosphate-5-phosphatase;Inositol-1,4,5-triphosphate-5-phosphatase;Inositol-1,4,5-triphosphate-5-phosphatase
15.1175	15.5105	15.667	15.5949	15.5738	16.0723	16.4368	16.3076	15.1763	15.5545	15.4252	15.6917	15.6859	15.9074	15.4781	15.7334	M1BU04	Inositol-1,4,5-triphosphate-5-phosphatase;Inositol-1,4,5-triphosphate-5-phosphatase;Inositol-1,4,5-triphosphate-5-phosphatase;Inositol-1,4,5-triphosphate-5-phosphatase;Inositol-1,4,5-triphosphate-5-phosphatase;Inositol-1,4,5-triphosphate-5-phosphatase;Inositol-1,4,5-triphosphate-5-phosphatase
15.1175	15.5105	15.667	15.5949	15.5738	16.0723	16.4368	16.3076	15.1763	15.5545	15.4252	15.6917	15.6859	15.9074	15.4781	15.7334	M1BU05	Inositol-1,4,5-triphosphate-5-phosphatase;Inositol-1,4,5-triphosphate-5-phosphatase;Inositol-1,4,5-triphosphate-5-phosphatase;Inositol-1,4,5-triphosphate-5-phosphatase;Inositol-1,4,5-triphosphate-5-phosphatase;Inositol-1,4,5-triphosphate-5-phosphatase;Inositol-1,4,5-triphosphate-5-phosphatase
15.1175	15.5105	15.667	15.5949	15.5738	16.0723	16.4368	16.3076	15.1763	15.5545	15.4252	15.6917	15.6859	15.9074	15.4781	15.7334	M1BU06	Inositol-1,4,5-triphosphate-5-phosphatase;Inositol-1,4,5-triphosphate-5-phosphatase;Inositol-1,4,5-triphosphate-5-phosphatase;Inositol-1,4,5-triphosphate-5-phosphatase;Inositol-1,4,5-triphosphate-5-phosphatase;Inositol-1,4,5-triphosphate-5-phosphatase;Inositol-1,4,5-triphosphate-5-phosphatase
15.1175	15.5105	15.667	15.5949	15.5738	16.0723	16.4368	16.3076	15.1763	15.5545	15.4252	15.6917	15.6859	15.9074	15.4781	15.7334	M1BU07	Inositol-1,4,5-triphosphate-5-phosphatase;Inositol-1,4,5-triphosphate-5-phosphatase;Inositol-1,4,5-triphosphate-5-phosphatase;Inositol-1,4,5-triphosphate-5-phosphatase;Inositol-1,4,5-triphosphate-5-phosphatase;Inositol-1,4,5-triphosphate-5-phosphatase;Inositol-1,4,5-triphosphate-5-phosphatase
15.1175	15.5105	15.667	15.5949	15.5738	16.0723	16.4368	16.3076	15.1763	15.5545	15.4252	15.6917	15.6859	15.9074	15.4781	15.7334	M1BU08	Inositol-1,4,5-triphosphate-5-phosphatase;Inositol-1,4,5-triphosphate-5-phosphatase;Inositol-1,4,5-triphosphate-5-phosphatase;Inositol-1,4,5-triphosphate-5-phosphatase;Inositol-1,4,5-triphosphate-5-phosphatase;Inositol-1,4,5-triphosphate-5-phosphatase;Inositol-1,4,5-triphosphate-5-phosphatase
15.1175	15.5105	15.667	15.5949	15.5738	16.0723	16.4368	16.3076	15.1763	15.5545	15.4252	15.6917	15.6859	15.9074	15.4781	15.7334	M1BU09	Inositol-1,4,5-triphosphate-5-phosphatase;Inositol-1,4,5-triphosphate-5-phosphatase;Inositol-1,4,5-triphosphate-5-phosphatase;Inositol-1,4,5-triphosphate-5-phosphatase;Inositol-1,4,5-triphosphate-5-phosphatase;Inositol-1,4,5-triphosphate-5-phosphatase;Inositol-1,4,5-triphosphate-5-phosphatase
15.1175	15.5105	15.667	15.5949	15.5738	16.0723	16.4368	16.3076	15.1763	15.5545	15.4252	15.6917	15.6859	15.9074	15.4781	15.7334	M1C8R7	Inositol-1,4,5-triphosphate-5-phosphatase;Inositol-1,4,5-triphosphate-5-phosphatase;Inositol-1,4,5-triphosphate-5-phosphatase;Inositol-1,4,5-triphosphate-5-phosphatase;Inositol-1,4,5-triphosphate-5-phosphatase;Inositol-1,4,5-triphosphate-5-phosphatase;Inositol-1,4,5-triphosphate-5-phosphatase
13.5734	14.0134	14.2635	13.7445	14.1439	14.9054	15.0107	14.8937	13.4333	14.1327	13.6634	12.9013	14.4416	14.7556	14.4653	14.4842	M1BVP9	Myosin XI
17.0959	17.2931	17.462	17.4735	17.4387	17.5945	17.8446	17.8134	17.8167	17.913	17.8491	17.9976	18.007	18.0844	17.8936	18.007	M1BWP3	Argonaute protein group
13.4781	13.7266	13.6866	13.3973	12.5167	12.8814	13.4003	13.2869	13.2909	13.7301	13.5687	13.7315	13.152	12.462	12.7685	12.9445	M1BX87	Serine/threonine-protein kinase PBS1
13.4781	13.7266	13.6866	13.3973	12.5167	12.8814	13.4003	13.2869	13.2909	13.7301	13.5687	13.7315	13.152	12.462	12.7685	12.9445	M1BX88	Serine/threonine-protein kinase PBS1
9.29851	10.9323	9.70658	9.61503	10.7515	14.0794	14.4313	14.0935	11.0039	10.0285	10.7452	14.0387	14.5561	10.9857	14.2784	14.5145	M1BY00	Ethylene signaling protein
12.605	12.9205	13.075	12.3891	12.7464	13.6389	13.7355	13.5653	12.0159	12.6081	12.5668	12.846	13.6652	13.9354	13.5704	13.9472	M1BY00	Ethylene signaling protein
16.3994	16.6231	16.724	16.7463	16.8413	17.1669	16.9702	17.1313	15.9457	16.3452	16.0433	15.966	16.3095	16.488	16.2094	16.2149	M1BYR9	Uncharacterized protein
9.92991	9.40866	12.1648	17.417	16.7797	17.5559	17.8371	17.6618	17.2819	10.995	9.62292	9.92677	17.9555	9.99527	17.8212	11.8711	M1BZP9	Photosystem I reaction center subunit IV B isoform 2
12.8038	12.7059	13.2846	12.9406	12.3914	10.3782	11.5227	10.9126	12.837	13.1935	13.1765	13.4901	12.6228	10.7669	12.5619	10.6803	M1BZQ5	Myosin XI-2
21.6	21.8897	18.5058	21.1207	17.2917	16.2912	16.3798	16.3177	22.005	21.8235	21.7456	22.0959	22.0313	22.2005	21.9705	22.1674	M1C075	Heat shock cognate protein 80
10.3809	11.4771	11.4094	9.86389	12.0478	12.2452	12.8203	12.658	10.7655	10.0107	10.791	10.4797	11.0137	12.0167	11.9882	12.2128	M1C0Z5	C2 domain-containing protein
9.63582	9.74019	10.1026	9.0991	12.0478	12.2452	12.8203	12.658	11.0397	10.4567	10.791	11.3015	11.5431	12.0167	11.9882	10.9084	M1C0Z6	C2 domain-containing protein
14.5818	14.9833	15.079	15.0548	13.9863	14.778	13.8462	14.3919	14.7893	15.1405	15.0972	14.8966	14.4248	14.9131	14.7797	14.5776	M1C159	Calcium-dependent protein kinase CDPK1
13.6417	10.2829	9.14354	10.391	13.4052	13.8758	14.1037	13.8538	13.8466	14.2797	14.1514	14.1883	14.3711	10.1767	14.4829	9.902	M1C1T9	Phototropin-2
12.509	10.7711	12.7421	12.248	13.156	13.1661	13.2544	13.3355	12.5584	12.6136	12.7987	12.9781	13.1434	12.942	13.0804	13.0877	M1C3A6	Interferon-induced guanylate-binding protein
15.0016	15.3832	15.5183	15.3393	15.4121	16.0333	16.1442	16.0771	14.9724	15.4272	15.3069	15.6457	16.3831	16.3017	16.224	16.333	M1C3C8	Zinc finger family protein
15.0016	15.3832	15.5183	15.3393	15.4121	16.0333	16.1442	16.0771	14.9724	15.4272	15.3069	15.6457	16.3831	16.3017	16.224	16.333	M1C3C9	Zinc finger family protein
12.4017	12.7543	12.8137	12.8006	13.4541	13.9945	13.9101	13.8512	13.662	14.0137	13.8992	13.9566	14.8616	15.2928	14.845	14.9915	M1C3N6	Calmodulin
10.7069	10.2146	10.5872	10.4857	9.54464	9.46253	9.74536	9.95644	11.4965	11.9757	11.5304	11.7608	11.2705	11.254	11.1197	11.0743	M1C576	Histone H2B
12.979	13.3965	13.2537	13.2663	13.424	13.7256	13.8837	13.6355	12.4286	12.698	12.6618	12.9148	13.6159	13.5547	13.5602	13.7275	M1C5T8	Proteophosphoglycan ppg4
13.6297	14.8978	14.6921	14.619	13.0031	13.6952	12.6041	13.7495	14.5912	14.8248	14.7419	15.0144	12.4333	12.1205	13.473	13.5214	M1C639	Ubiquitin thiolesterase
13.6297	14.8978	14.6921	14.619	13.0031	13.6952	12.6041	13.7495	14.5912	14.8248	14.7419	15.0144	12.4333	12.1205	13.473	13.5214	M1C640	Ubiquitin thiolesterase
9.82543	10.6206	10.2999	10.1421	11.4527	11.4314	11.9203	11.8802	11.8083	11.1389	10.6117	11.6137	10.9139	11.3031	11.3477	11.2783	M1C6J2	Ubiquitin-protein ligase
12.2135	12.6055	12.8592	12.6703	12.9725	13.1973	13.2647	13.4187	12.4949	12.522	12.3987	12.5332	12.6562	12.711	12.5609	12.6856	M1C7Q7	Calcium/calmodulin protein kinase
13.4403	14.6223	13.1345	14.4249	10.7408	10.2867	9.35187	10.8431	13.7513	14.8583	10.6717	13.8161	13.3773	15.2475	14.4536	15.2534	M1C960	SIT4 phosphatase-associated family protein
15.5006	15.7809	15.791	15.7127	15.7828	15.94	16.0524	16.088	16.3004	16.4317	16.2239	16.4317	16.49	16.3996	16.3654	16.4191	M1C972	Zinc finger CCCH domain-containing protein 13
9.84645	11.319	10.0446	9.43787	11.7318	12.1572	12.5923	12.1953	12.9137	12.8688	12.9873	13.2016	13.6429	13.6294	13.4188	10.1449	M1CA25	Diacylglycerol kinase
10.2971	11.319	11.6615	9.19975	11.7318	12.1572	12.5923	12.1953	12.9137	12.8688	12.9873	13.2016	13.6429	13.6294	13.4188	10.8492	M1CA26	Diacylglycerol kinase
15.4297	15.9511	15.9969	15.7547	15.9884	16.4824	16.7358	16.6051	15.375	15.5599	15.4466	15.6395	16.7702	16.769	16.6288	16.8139	M1CAE2	Uridine cytidine kinase I
13.4296	14.2365	14.6249	13.9712	14.3061	15.1429	15.275	15.7168	14.2207	14.5993	14.3758	14.445	15.7311	16.1732	16.1822	16.4095	M1CAE4	Uridine cytidine kinase I
13.8083	13.9341	13.8283	13.4315	10.3417	9.23258	11.792	12.7593	10.2023	9.64642	10.1499	11.6057	10.038	11.2546	9.39779	10.0927	M1CAV2	Deoxyuridine 5'-triphosphate nucleotidohydrolase
16.9623	17.1061	17.4597	17.353	17.5897	18.1788	18.226	18.2403	17.223	17.6259	17.473	17.7166	18.1578	18.1746	18.0196	18.1525	M1CBM7	Yth domain-containing protein
16.9623	17.1061	17.4597	17.353	17.5897	18.1788	18.226	18.2403	17.223	17.6259	17.473	17.7166	18.1578	18.1746	18.0196	18.1525	M1CBM8	Yth domain-containing protein
13.6722	13.8946	13.838	13.9121	11.0958	12.3112	12.4405	12.4685	14.1939	14.2479	14.267	14.6806	14.9005	14.9196	14.7092	15.1262	M1CDK0	Uncharacterized protein
13.6722	13.8946	13.838	13.9121	11.0958	12.3112	12.4405	12.4685	14.1939	14.2479	14.267	14.6806	14.9005	14.9196	14.7092	15.1262	M1CDK1	Uncharacterized protein
12.9658	13.1518	13.4004	13.3477	13.3341	13.6406	13.7993	13.7111	12.8178	13.2362	13.0952	13.2695	13.3625	13.4067	13.3322	13.3801	M1CFN1	Zinc finger protein-like 1
12.9658	13.1518	13.4004	13.3477	13.3341	13.6406	13.7993	13.7111	12.8178	13.2362	13.0952	13.2695	13.3625	13.4067	13.3322	13.3801	M1CFN2	Zinc finger protein-like 1
12.9658	13.1518	13.4004	13.3477	13.3341	13.6406	13.7993	13.7111	12.8178	13.2362	13.0952	13.2695	13.3625	13.4067	13.3322	13.3801	M1CFN3	Zinc finger protein-like 1
10.2618	11.0542	10.2413	9.23314	11.8892	12.0267	13.4249	12.5188	12.1164	12.4378	12.6875	12.6942	13.2521	13.3539	13.0705	13.8332	M1CFV6	Phi-2
12.6196	12.5934	13.0635	12.7736	12.946	13.1525	13.4005	13.2938	13.1701	13.4614	13.4812	13.5673	14.1236	14.1626	13.9225	14.0706	M1CFW5	Serine/threonine-protein kinase SAPK10
10.4789	10.5241	11.2012	10.669	11.2986	11.9931	12.3109	12.4113	10.8423	11.3704	11.2574	11.5917	11.2323	11.6484	11.3452	11.6855	M1CG33	GTP-binding protein alpha subunit, gna;GTP-binding protein alpha subunit, gna
10.4789	10.5241	11.2012	10.669	11.2986	11.9931	12.3109	12.4113	10.8423	11.3704	11.2574	11.5917	11.2323	11.6484	11.3452	11.6855	M1CG35	GTP-binding protein alpha subunit, gna;GTP-binding protein alpha subunit, gna
14.7299	14.9938	15.1125	9.66538	9.90491	9.62234	10.5696	9.70367	10.0141	10.8729	11.5163	9.99375	15.6153	15.4345	15.2055	10.032	M1CG73	Vesicle-associated membrane protein
12.1906	10.8781	10.0121	10.9594	9.19401	8.37183	9.68241	9.97866	10.5844	11.1408	12.7641	14.5785	12.5006	12.2484	12.7756	14.4336	M1CG73	Vesicle-associated membrane protein
12.1906	10.8781	10.0121	10.9594	9.7238	8.37183	9.68241	9.97866	10.5844	11.1408	12.7641	14.5785	12.5006	12.2484	12.7756	14.4336	M1CG73	Vesicle-associated membrane protein
12.1906	10.8781	10.0121	10.9594	9.19401	8.37183	9.68241	9.97866	10.3627	11.1408	12.7641	14.5785	12.5006	12.2484	12.7756	14.4336	M1CG73	Vesicle-associated membrane protein
13.5551	13.5422	13.598	13.5061	12.3476	12.6708	12.8463	12.9694	12.803	13.3177	12.8751	12.8726	12.4219	12.2021	12.6728	12.5753	M1CIH8	Chlorophyll a-b binding protein, chloroplastic
17.7867	17.9945	18.1591	18.1326	18.1347	18.5648	18.7517	18.7656	18.72	18.9413	18.8242	19.0636	19.0572	19.138	18.9595	19.146	M1CIN4	XS domain-containing protein;Uncharacterized protein
16.9896	17.2123	17.4414	17.4203	17.4054	17.8695	18.0089	18.0947	17.9574	18.0996	18.0561	18.2329	18.2089	18.3333	18.1508	18.334	M1CIN4	XS domain-containing protein;Uncharacterized protein
16.9896	17.2123	17.4414	17.4203	17.4054	17.8695	18.0089	18.0947	17.9574	18.0996	18.0561	18.2329	18.2089	18.3333	18.1508	18.334	M1CIN4	XS domain-containing protein;Uncharacterized protein
17.7867	17.9945	18.1591	18.1326	18.1347	18.5648	18.7517	18.7656	18.72	18.9413	18.8242	19.0636	19.0572	19.138	18.9595	19.146	M1CIN5	XS domain-containing protein;Uncharacterized protein
16.9896	17.2123	17.4414	17.4203	17.4054	17.8695	18.0089	18.0947	17.9574	18.0996	18.0561	18.2329	18.2089	18.3333	18.1508	18.334	M1CIN5	XS domain-containing protein;Uncharacterized protein
16.9896	17.2123	17.4414	17.4203	17.4054	17.8695	18.0089	18.0947	17.9574	18.0996	18.0561	18.2329	18.2089	18.3333	18.1508	18.334	M1CIN5	XS domain-containing protein;Uncharacterized protein
16.4383	16.2905	16.7617	16.5868	16.6537	17.033	17.1888	17.1959	17.2777	17.4571	17.2391	17.5458	17.5322	17.5389	17.182	17.2948	M1CIN4	XS domain-containing protein;Uncharacterized protein
16.4383	16.2905	16.7617	16.5868	16.6537	17.033	17.1888	17.1959	17.2777	17.4571	17.2391	17.5458	17.5322	17.5389	17.182	17.2948	M1CIN5	XS domain-containing protein;Uncharacterized protein
13.5378	13.3311	11.2288	13.2903	14.2307	14.9403	13.6101	14.954	15.1893	15.6652	15.3432	15.3004	15.4939	15.8456	15.512	15.5165	M1CIN4	XS domain-containing protein;Uncharacterized protein
14.4859	14.5964	14.8875	14.77	14.8345	15.3299	15.4559	15.3211	15.5342	15.7741	15.6704	15.8003	15.8718	15.8354	15.68	15.8511	M1CIN4	XS domain-containing protein;Uncharacterized protein
14.4859	14.5964	14.8875	14.77	14.8345	15.3299	15.4559	15.3211	15.5342	15.7741	15.6704	15.8003	15.8718	15.8354	15.68	15.8511	M1CIN5	XS domain-containing protein;Uncharacterized protein
13.9824	14.1686	14.3103	14.1089	14.39	14.6153	14.6918	14.7244	14.8744	15.2861	14.8833	15.1645	15.192	15.157	14.9437	15.017	M1CIN4	XS domain-containing protein;Uncharacterized protein
13.9824	14.1686	14.3103	14.1089	14.39	14.6153	14.6918	14.7244	14.8744	15.2861	14.8833	15.1645	15.192	15.157	14.9437	15.017	M1CIN5	XS domain-containing protein;Uncharacterized protein
13.6983	13.7107	13.9009	13.7513	14.1705	14.3683	14.4452	14.4389	14.5925	14.8209	14.6166	14.8653	14.9381	14.8676	14.6537	14.8194	M1CIN4	XS domain-containing protein;Uncharacterized protein
13.6983	13.7107	13.9009	13.7513	14.1705	14.3683	14.4452	14.4389	14.5925	14.8209	14.6166	14.8653	14.9381	14.8676	14.6537	14.8194	M1CIN4	XS domain-containing protein;Uncharacterized protein
13.6983	13.7107	13.9009	13.7513	14.1705	14.3683	14.4452	14.4389	14.5925	14.8209	14.6166	14.8653	14.9381	14.8676	14.6537	14.8194	M1CIN5	XS domain-containing protein;Uncharacterized protein
13.6983	13.7107	13.9009	13.7513	14.1705	14.3683	14.4452	14.4389	14.5925	14.8209	14.6166	14.8653	14.9381	14.8676	14.6537	14.8194	M1CIN5	XS domain-containing protein;Uncharacterized protein
10.9371	11.1274	11.0381	11.0688	9.77338	10.5804	10.0698	10.3832	10.9871	10.5585	10.1596	10.6812	11.6635	10.8626	11.5025	9.57586	M1CK06	Biotin synthase
13.9704	14.5016	14.2719	14.1779	12.2151	13.2187	13.146	12.7582	11.308	11.3422	11.3894	11.351	11.4141	11.4318	11.2005	11.8626	M1CKI6	GDP-L-galactose phosphorylase
15.6359	15.88	16.1319	15.239	15.9949	16.3235	16.4867	16.6083	16.6193	16.5662	16.5365	16.7152	16.9951	17.0087	16.7522	16.9031	M1CMC4	RanBP2-type domain-containing protein
15.6359	15.88	16.1319	15.239	15.9949	16.3235	16.4867	16.6083	16.6193	16.5662	16.5365	16.7152	16.9951	17.0087	16.7522	16.9031	M1CMC4	RanBP2-type domain-containing protein
14.3056	14.6171	14.7176	14.8436	14.9654	15.5566	15.5418	15.6009	14.6844	15.0439	14.8555	15.0571	15.0594	14.9556	15.1435	15.2607	M1CND1	Calcium-binding protein CAST
14.3056	14.6171	14.7176	14.8436	14.9654	15.5566	15.5418	15.6009	14.6844	15.0439	14.8555	15.0571	15.0594	14.9556	15.1435	15.2607	Q09011	Calcium-binding protein CAST
17.4175	17.4754	17.6436	17.7525	16.755	17.1756	17.3976	17.1933	16.8007	17.229	17.0524	17.1352	17.0152	17.2144	16.9292	17.1902	M1CP15	J-domain protein required for chloroplast accumulation response 1;Heat shock protein binding protein;Heat shock protein binding protein
17.4175	17.4754	17.6436	17.7525	16.755	17.1756	17.3976	17.1933	16.8007	17.229	17.0524	17.1352	17.0152	17.2144	16.9292	17.1902	M1CP17	J-domain protein required for chloroplast accumulation response 1;Heat shock protein binding protein;Heat shock protein binding protein
17.4175	17.4754	17.6436	17.7525	16.755	17.1756	17.3976	17.1933	16.8007	17.229	17.0524	17.1352	17.0152	17.2144	16.9292	17.1902	M1CP18	J-domain protein required for chloroplast accumulation response 1;Heat shock protein binding protein;Heat shock protein binding protein
18.3342	18.6455	18.7112	18.6725	17.7279	18.5228	17.8919	18.2578	17.9801	18.2623	17.9995	18.2177	18.5371	18.6913	18.466	18.5569	M1CPB7	Sucrose-phosphate synthase;Probable sucrose-phosphate synthase
18.3342	18.6455	18.7112	18.6725	17.7279	18.5228	17.8919	18.2578	17.9801	18.2623	17.9995	18.2177	18.5371	18.6913	18.466	18.5569	Q43845	Sucrose-phosphate synthase;Probable sucrose-phosphate synthase
14.6263	14.7604	14.885	14.6444	14.8079	15.3194	15.2157	15.2632	14.5007	14.9274	14.7019	15.0491	14.8574	14.9204	14.8269	15.0883	M1CPC8	RIN4c protein
14.6263	14.7604	14.885	14.6444	14.8079	15.3194	15.2157	15.2632	14.5007	14.9274	14.7019	15.0491	14.8574	14.9204	14.8269	15.0883	M1CPC9	RIN4c protein
14.6263	14.7604	14.885	14.6444	14.8079	15.3194	15.2157	15.2632	14.5007	14.9274	14.7019	15.0491	14.8574	14.9204	14.8269	15.0883	M1CPD0	RIN4c protein
14.6263	14.7604	14.885	14.6444	14.8079	15.3194	15.2157	15.2632	14.5007	14.9274	14.7019	15.0491	14.8574	14.9204	14.8269	15.0883	M1CPD1	RIN4c protein
14.6263	14.7604	14.885	14.6444	14.8079	15.3194	15.2157	15.2632	14.5007	14.9274	14.7019	15.0491	14.8574	14.9204	14.8269	15.0883	M1CPD2	RIN4c protein
13.1924	13.2747	13.7188	13.4197	13.5507	13.7741	13.8707	13.876	12.4328	12.1109	13.0243	13.5197	13.0105	12.9297	12.7793	12.9834	M1CPC8	RIN4c protein
13.1924	13.2747	13.7188	13.4197	13.5507	13.7741	13.8707	13.876	12.4328	12.1109	13.0243	13.5197	13.0105	12.9297	12.7793	12.9834	M1CPC9	RIN4c protein
13.1924	13.2747	13.7188	13.4197	13.5507	13.7741	13.8707	13.876	12.4328	12.1109	13.0243	13.5197	13.0105	12.9297	12.7793	12.9834	M1CPD0	RIN4c protein
13.1924	13.2747	13.7188	13.4197	13.5507	13.7741	13.8707	13.876	12.4328	12.1109	13.0243	13.5197	13.0105	12.9297	12.7793	12.9834	M1CPD1	RIN4c protein
13.1924	13.2747	13.7188	13.4197	13.5507	13.7741	13.8707	13.876	12.4328	12.1109	13.0243	13.5197	13.0105	12.9297	12.7793	12.9834	M1CPD2	RIN4c protein
10.0486	10.2581	10.2172	13.6528	13.6809	13.6896	13.9755	13.7435	9.42149	13.7437	10.8714	10.6316	9.41245	14.1185	13.8136	10.8854	M1CPW3	Splicing factor
17.7441	18.0352	18.2528	18.1151	18.1	18.5795	18.904	18.823	16.8336	17.3456	17.1163	17.3625	17.3068	17.434	17.2334	17.4314	M1CQ68	Calmodulin binding protein
17.7441	18.0352	18.2528	18.1151	18.1	18.5795	18.904	18.823	16.8336	17.3456	17.1163	17.3625	17.3068	17.434	17.2334	17.4314	M1CQ71	Calmodulin binding protein
14.1728	14.5896	14.511	14.4403	14.6639	15.0083	15.4833	15.4107	12.9418	12.8562	13.423	13.3313	12.9805	10.1615	9.29555	10.0802	M1CQ68	Calmodulin binding protein
14.1728	14.5896	14.511	14.4403	14.6639	15.0083	15.4833	15.4107	12.9418	12.8562	13.423	13.3313	12.9805	10.1615	9.29555	10.0802	M1CQ71	Calmodulin binding protein
13.5795	13.6126	13.802	13.5649	13.4058	13.532	13.4875	13.3484	13.7845	13.9832	13.753	13.9506	13.9328	13.9346	13.5355	13.863	M1CQL6	Pre-mRNA splicing factor
13.8121	13.904	13.6784	13.5863	14.3028	14.0837	13.8955	14.0875	14.3793	14.3828	14.2903	14.154	14.8998	14.8567	14.7292	14.8363	M1CQY3	Uncharacterized protein
15.979	16.0119	16.1051	15.8993	14.9074	15.4207	14.9034	15.6017	15.1488	16.1632	16.2927	16.4659	15.9532	16.083	15.8992	15.1007	M1CRK5	Non-specific serine/threonine protein kinase
14.1012	14.4927	14.4227	14.5068	13.3438	13.9167	13.7613	13.6105	14.5956	15.2544	15.2905	15.0477	14.713	14.4337	14.5904	14.6895	M1CSR7	Receptor protein kinase
13.3302	13.5596	13.4662	13.67	12.8281	13.1523	10.5201	11.2506	13.1307	12.9897	12.9719	13.1729	13.2675	13.1749	13.1274	13.3969	M1CSS4	AT-hook motif nuclear-localized protein
11.9061	12.5465	12.2958	12.3973	12.5143	12.6911	12.9411	13.1724	12.6487	13.1453	12.8485	12.7616	12.9065	13.1032	13.1295	13.1593	M1CT31	Kinase
19.2776	19.5311	19.7004	19.8748	18.5133	19.2353	18.9686	19.0593	19.2055	19.4859	19.2951	19.072	18.5712	18.9993	18.9031	18.8476	M1CTV1	ATP synthase subunit d
15.5295	15.7694	15.9329	15.8974	15.9618	16.7501	16.6292	16.5508	15.7342	16.2442	16.0324	16.4643	15.9141	15.964	15.7116	15.9395	M1CWC7	Pleiotropic drug resistance protein 1
15.5295	15.7694	15.9329	15.8974	15.9618	16.7501	16.6292	16.5508	15.7342	16.2442	16.0324	16.4643	15.9141	15.964	15.7116	15.9395	M1CWC8	Pleiotropic drug resistance protein 1
10.7117	11.4164	11.1137	10.0899	11.3016	12.1582	11.8279	12.1982	10.95	11.7586	10.1778	10.9871	11.0421	10.917	11.141	11.8485	M1CWL7	Eukaryotic translation initiation factor 3 subunit D
14.3038	14.6986	14.7926	14.4436	12.9071	13.5501	14.0067	13.6188	14.2841	14.7448	14.4632	14.9787	14.7034	14.4618	14.2448	14.6533	M1CWT7	Auxin repressed/dormancy associated protein
15.6718	15.8075	15.7984	15.7231	14.9677	15.4559	15.5902	15.4731	16.0498	16.2496	16.0961	16.5334	16.5159	16.405	16.165	16.638	M1CZU3	Nodulation receptor kinase
11.6404	12.1503	12.3495	10.7123	9.8977	10.6148	10.1732	10.1631	12.2468	12.1758	12.0281	12.8841	12.2867	12.1032	11.6438	12.4676	M1CZW4	Auxin efflux carrier component
14.1103	14.6097	14.7174	14.8141	14.7874	15.361	15.6593	15.521	14.5053	14.9566	14.8272	15.1412	10.8971	14.9666	14.4774	14.7343	M1D0V7	Protein-serine/threonine phosphatase;Protein-serine/threonine phosphatase;DNA-binding protein phosphatase 2C
14.1103	14.6097	14.7174	14.8141	14.7874	15.361	15.6593	15.521	14.5053	14.9566	14.8272	15.1412	9.00986	14.9666	14.4774	14.7343	M1D0V8	Protein-serine/threonine phosphatase;Protein-serine/threonine phosphatase;DNA-binding protein phosphatase 2C
14.1103	14.6097	14.7174	14.8141	14.7874	15.361	15.6593	15.521	14.5053	14.9566	14.8272	15.1412	9.57238	14.9666	14.4774	14.7343	M1D0V9	Protein-serine/threonine phosphatase;Protein-serine/threonine phosphatase;DNA-binding protein phosphatase 2C
11.7168	11.705	11.8892	11.391	9.69937	10.3439	9.77682	11.8164	10.4541	11.37	11.4648	10.438	12.6096	12.8184	12.7416	12.8152	M1D198	Membrane protein PB1A10.07c
18.1953	18.3402	18.5233	18.5348	18.4242	18.9144	18.9774	19.0378	18.607	18.8035	18.7574	18.938	18.8485	18.9111	18.7627	18.89	M1D2H4	Glycine-rich RNA-binding protein
13.5315	11.6636	11.936	10.2306	10.2994	9.83962	9.84878	10.503	13.7908	14.053	14.1407	14.1662	13.4267	13.7289	13.5697	13.7617	M1D2N6	Stress-induced protein
11.9366	11.9899	10.5746	12.0188	12.0549	12.7487	13.4401	13.0465	9.43096	12.0628	12.181	12.6541	12.1401	12.5781	11.9154	12.5335	M1D368	Protein kinase atsik
11.9366	11.9899	11.0112	12.0188	12.0549	12.7487	13.4401	13.0465	9.97335	12.0628	12.181	12.6541	12.1401	12.5781	11.9154	12.5335	M1D369	Protein kinase atsik
12.7684	14.0886	14.029	14.0803	10.9986	13.3446	10.6011	12.0966	11.7587	9.61914	11.2252	10.6054	11.1521	11.6733	12.0211	11.4477	M1D515	Uncharacterized protein
12.4277	12.8659	13.0198	12.9931	11.3992	12.2373	9.88528	10.0829	11.9277	10.7993	11.8652	12.0031	11.5975	10.2092	11.6293	12.1163	M1D515	Uncharacterized protein
15.5176	15.6699	15.9588	15.8966	15.8829	16.2403	16.3915	16.3219	15.5421	15.889	15.6875	15.909	15.706	15.822	15.5884	15.7718	M1D518	CDC48-interacting UBX-domain protein
10.3934	10.1522	12.9544	9.60878	12.6049	13.081	13.5003	13.0848	10.7281	10.9129	13.9669	14.6228	15.3537	15.3833	14.4831	15.2814	M1DAP3	Sugar transporter
15.0232	15.2754	15.4797	15.241	15.3801	15.9221	15.9381	15.9969	13.9991	13.86	14.0282	14.2096	15.4189	15.5287	15.3232	15.6418	M1DBC3	Amino acid transporter
14.4676	14.4676	14.3816	14.3791	14.0943	14.0704	13.6555	14.141	14.4746	14.5345	14.6375	14.7317	15.1122	15.005	14.6147	14.9766	M1DZE3	Cell surface glycoprotein
12.1749	12.0222	12.2279	12.5917	13.1533	13.546	13.5868	12.8978	12.5315	13.0349	12.564	12.9517	14.0704	14.1216	14.0351	14.2257	O04940	Phosphatidate cytidylyltransferase 1
14.4266	12.854	12.014	14.5575	10.3028	9.47487	10.8822	10.0925	14.2349	13.0004	12.966	12.8698	12.8424	12.1575	10.5659	10.4957	P93566	Oxygen-evolving enhancer protein 2, chloroplastic
16.3606	16.5897	16.6044	16.5407	15.2581	15.7935	15.8549	15.9148	16.4319	16.5451	16.5124	16.6927	16.5919	16.8771	16.6347	16.8369	Q27S35	Photosystem II reaction center protein L
16.9228	17.3916	17.4313	16.7077	17.4694	17.9207	17.8644	17.86	16.1538	16.3367	16.1998	16.2578	18.0124	18.0023	17.5477	17.7241	Q2VCJ5	40S ribosomal protein S6
16.8585	17.3324	17.3621	16.6675	17.4258	17.9267	17.7913	17.7873	16.4215	16.3016	16.1573	16.2231	18.0155	17.9967	17.551	17.7163	Q2VCJ5	40S ribosomal protein S6
16.9228	17.3916	17.4313	16.7077	17.4694	17.9207	17.8644	17.86	16.1538	16.3367	16.1998	16.2578	18.0124	18.0023	17.5477	17.7241	Q3HVK4	40S ribosomal protein S6
16.8585	17.3324	17.3621	16.6675	17.4258	17.9267	17.7913	17.7873	16.4215	16.3016	16.1573	16.2231	18.0155	17.9967	17.551	17.7163	Q3HVK4	40S ribosomal protein S6
12.1317	12.6381	11.5337	12.8482	11.8701	9.35033	10.5535	10.8148	12.9281	13.035	11.5869	12.4817	12.8375	12.8689	12.5957	12.9861	Q2VEF1	Photosystem II reaction center protein H
12.7384	12.9502	13.063	13.0409	11.8158	12.1138	12.769	12.418	9.45881	11.605	12.5609	12.9018	10.0668	12.426	12.3877	12.5341	Q2VEH0	ATP synthase subunit beta, chloroplastic
14.6599	14.7646	14.6097	14.5792	15.0952	15.6025	15.4781	15.2988	14.1711	17.9074	14.5814	14.6285	14.9608	14.8894	14.7386	14.599	Q2VEJ6	Photosystem II protein D1
13.2335	13.5307	13.5754	13.4906	13.6163	13.9413	13.9225	13.9787	13.346	13.5352	13.403	13.4879	13.5624	13.7572	13.6591	13.6754	Q9M4G4	Phosphoglucomutase, cytoplasmic
10.8152	12.5883	12.6574	10.9168	10.118	10.1368	13.1806	12.9113	11.7693	12.4083	10.1383	12.8754	10.3683	11.0982	10.6055	11.052	A0A0B4J3K8	GDP-mannose 3',5'-epimerase
13.5826	14.0817	13.8413	13.7501	13.1766	13.6425	13.7684	13.5716	9.81666	9.29805	10.4136	12.1803	12.6808	12.4618	12.7813	12.9214	A0A0B4J3L0	Hexosyltransferase
13.9983	10.7819	10.1606	14.086	13.1417	13.7082	13.9298	13.6626	10.8708	13.9832	13.6905	14.2817	12.981	10.589	12.8401	11.7933	A5A7I8	Calcium-dependent protein kinase 5
12.6825	12.9869	13.111	12.9583	12.9152	13.4146	13.6766	13.7771	13.1347	13.4867	13.3243	13.7082	13.3756	13.6812	13.3949	13.5648	A5A7I8	Calcium-dependent protein kinase 5
12.2464	11.9569	12.887	10.1175	12.1976	12.6589	13.3608	13.4679	12.2849	12.2792	12.676	13.5181	12.7715	13.0016	12.5848	13.4334	A5A7I8	Calcium-dependent protein kinase 5
12.2464	11.9569	12.887	10.1175	12.1976	12.6589	13.3608	13.4679	12.2849	12.2792	12.676	13.5181	12.7715	13.0016	12.5848	13.4334	A5A7I8	Calcium-dependent protein kinase 5
12.7889	13.4139	13.3847	13.1556	12.7947	13.4592	13.7208	13.5834	13.1074	13.232	13.1499	13.4725	13.8203	13.8947	13.4451	13.9672	D5ILC3	Nucleoside diphosphate kinase
15.0849	15.2777	15.0801	15.2196	15.1806	15.2904	15.2556	15.248	14.3802	14.4413	14.4846	14.6235	15.072	15.0534	14.906	15.0092	J9ULI1	Osmotic stress-activated protein kinase
16.7958	17.0766	17.3485	17.1688	17.0856	17.6426	17.8649	17.796	16.9057	17.3926	17.0834	17.3347	17.568	17.8078	17.4622	17.698	M0ZG39	Synaptotagmin
16.7958	17.0766	17.3485	17.1688	17.0856	17.6426	17.8649	17.796	16.9057	17.3926	17.0834	17.3347	17.568	17.8078	17.4622	17.698	M0ZG41	Synaptotagmin
13.4007	13.6718	13.6285	13.6958	13.1502	13.4209	13.6455	13.5847	13.0512	12.885	13.1253	13.3153	13.5593	13.1637	13.3574	13.6446	M0ZG44	Ulp1 protease family, C-terminal catalytic domain containing protein
11.1389	11.2221	11.9185	11.3306	10.8784	11.4339	11.8748	12.1708	12.0486	12.2457	12.1848	12.2521	12.6631	12.6635	12.4039	12.8159	M0ZG44	Ulp1 protease family, C-terminal catalytic domain containing protein
13.324	13.4982	13.9013	13.67	13.45	13.8607	14.0369	14.0531	13.2291	13.283	13.3414	13.7183	13.5391	13.7501	13.6205	13.8818	M0ZG82	Chromatin remodeling complex subunit
10.2791	11.7693	12.5937	10.0744	12.8146	12.9944	9.67149	13.1573	9.95645	13.2264	11.4749	11.0236	13.9297	10.2455	13.7017	14.0624	M0ZGE3	BTB/POZ protein
11.1383	11.7693	12.5937	9.16739	12.8146	12.9944	10.7083	13.1573	10.4807	13.2264	10.1898	11.6182	13.9297	10.9255	13.7017	14.0624	M0ZGE4	BTB/POZ protein
12.9302	13.3142	13.3159	13.1767	12.634	12.9757	13.5576	10.7118	10.4336	10.1386	10.8717	12.9002	12.8231	12.5827	12.4582	12.4681	M0ZGH8	Ubiquitin family protein
11.9179	12.1797	12.2428	12.1167	11.4277	11.9024	12.0212	11.7076	12.3214	12.4809	12.2942	12.5871	12.4664	12.3866	12.302	12.5922	M0ZGH9	F-box/LRR-repeat protein
14.4099	14.8268	14.9397	14.2187	14.0366	14.4439	14.5749	14.6268	14.3117	14.1508	14.4245	14.456	14.5736	14.608	14.4002	14.8876	M0ZGI3	Eukaryotic translation initiation factor 3 subunit
12.5194	12.63	13.0113	9.68788	8.89002	11.071	10.9174	11.2811	12.5729	13.0719	13.0045	13.1356	10.4842	10.8721	11.434	10.4914	M0ZGI5	Diacylglycerol O-acyltransferase
9.45107	12.4907	12.7766	10.1382	10.9559	12.8745	13.2761	13.1929	13.292	13.4002	13.4599	13.5894	13.4879	13.684	13.3964	13.7946	M0ZGR5	Uncharacterized protein
10.2839	12.4907	12.7766	11.3351	11.2952	12.8745	13.2761	13.1929	13.292	13.4002	13.4599	13.5894	13.4879	13.684	13.3964	13.7946	M0ZGR7	Uncharacterized protein
10.2805	12.4907	12.7766	10.6255	9.60521	12.8745	13.2761	13.1929	13.292	13.4002	13.4599	13.5894	13.4879	13.684	13.3964	13.7946	M0ZGR8	Uncharacterized protein
10.6715	12.4907	12.7766	9.78606	9.21258	12.8745	13.2761	13.1929	13.292	13.4002	13.4599	13.5894	13.4879	13.684	13.3964	13.7946	M0ZGR9	Uncharacterized protein
16.1476	16.321	16.4786	16.2757	15.8811	16.4533	16.6793	16.6133	16.3535	16.54	16.4482	16.7389	16.5756	16.6676	16.4277	16.61	M0ZGX0	Angustifolia
16.8192	17.2337	17.3695	16.5164	16.4979	17.0093	17.7848	17.3332	16.6533	16.9793	16.9604	17.2634	17.8804	17.6457	17.5264	17.7097	M0ZGX2	Uncharacterized protein;Negatively light-regulated protein
16.8192	17.2337	17.3695	16.5164	16.4979	17.0093	17.7848	17.3332	16.6533	16.9793	16.9604	17.2634	17.8804	17.6457	17.5264	17.7097	M1BPH6	Uncharacterized protein;Negatively light-regulated protein
11.2098	11.1558	10.9902	10.0709	10.618	11.3439	9.74827	11.0034	10.9363	10.8036	11.0528	11.6334	10.6044	10.6006	9.30735	11.4581	M0ZH13	Dead box ATP-dependent RNA helicase
11.2098	11.1558	10.9902	10.0709	10.618	11.3439	9.74827	11.0034	10.9363	10.8036	11.0528	11.6334	10.6044	10.727	9.30735	11.4581	M0ZH14	Dead box ATP-dependent RNA helicase
16.2226	16.6215	16.6844	16.6617	16.2092	16.8468	17.129	17.0171	15.933	16.3339	16.2418	16.5721	16.8357	16.8671	16.7306	16.9159	M0ZH84	MAPKK
11.6489	11.8435	12.1713	9.51561	11.4894	12.2065	12.7073	11.8036	11.212	11.0221	11.9662	12.24	11.9553	12.3727	11.8515	12.2029	M0ZHD7	Cak1
11.6489	11.8435	12.1713	9.51561	11.4894	12.2065	12.7073	11.8036	11.212	11.0221	11.9662	12.24	11.9553	12.3727	11.8515	12.2029	M0ZHD8	Cak1
11.2982	11.8533	11.8094	10.509	11.4264	12.0929	12.2922	12.1905	11.5697	12.1343	11.7665	12.1952	11.7997	11.8792	11.5331	12.1307	M0ZHD7	Cak1
11.2982	11.8533	11.8094	10.3369	11.4264	12.0929	12.2922	12.1905	11.5697	12.1343	11.7665	12.1952	11.7997	11.8792	11.5331	12.1307	M0ZHD8	Cak1
17.4626	17.8017	17.863	17.7257	17.0239	17.5946	18.0197	17.8804	17.2428	17.7046	17.4935	17.7942	17.7714	17.8169	17.5975	18.0052	M0ZHF8	GTP-ase activating protein for Arf containing protein
17.3061	17.2484	17.228	17.0668	16.5895	17.0029	17.2044	17.0806	17.0144	17.4545	17.0105	17.3395	17.6076	17.6011	17.1791	17.7558	M0ZHF8	GTP-ase activating protein for Arf containing protein
16.7375	16.8987	14.7494	16.8457	16.6229	17.0057	17.107	17.2945	16.4291	16.6851	14.2538	16.7744	16.5974	16.4804	16.6279	16.8869	M0ZHF8	GTP-ase activating protein for Arf containing protein
13.7111	13.8934	13.9949	9.22001	13.6832	13.7391	13.8008	13.7734	13.6884	14.0057	13.7004	13.974	14.0856	14.0455	9.94782	10.683	M0ZHF8	GTP-ase activating protein for Arf containing protein
11.949	10.6473	9.69996	10.5659	11.8423	10.609	9.66167	11.7478	12.3266	12.4285	9.20894	12.76	10.9026	12.5418	12.4471	10.1993	M0ZHF8	GTP-ase activating protein for Arf containing protein
11.949	9.38471	9.00551	11.6091	11.8423	10.1469	9.46956	11.7478	12.3266	12.4285	9.9432	12.76	10.516	12.5418	12.4471	10.8749	M0ZHF8	GTP-ase activating protein for Arf containing protein
10.4634	9.42691	10.5447	9.67877	10.5017	9.63574	10.583	9.73815	14.5916	14.9631	14.6117	14.9364	14.4754	14.6687	14.3508	14.5934	M0ZHF8	GTP-ase activating protein for Arf containing protein
13.7887	13.952	14.2104	13.4515	13.9291	14.2899	14.264	14.7739	14.9362	15.1441	14.9465	15.3619	15.1372	15.1571	14.9362	15.1579	M0ZHK3	Splicing factor U2af large subunit B
13.7887	13.952	14.2104	13.4515	13.9291	14.2899	14.264	14.7739	14.9362	15.1441	14.9465	15.3619	15.1372	15.1571	14.9362	15.1579	M0ZHK4	Splicing factor U2af large subunit B
13.9592	12.3497	14.5713	14.3494	13.8096	14.2901	14.6046	14.5009	14.2843	14.554	14.4901	14.908	14.9654	14.8015	14.76	14.9662	M0ZHK8	Chloroplast processing enzyme
13.9592	12.3497	14.5713	14.3494	13.8096	14.2901	14.6046	14.5009	14.2843	14.554	14.4901	14.908	14.9654	14.8015	14.76	14.9662	M0ZHK9	Chloroplast processing enzyme
17.2068	18.0526	17.6499	17.2812	17.0307	17.642	17.5705	17.6843	17.637	18.5252	18.2864	17.874	18.4211	18.5295	18.3028	17.8793	M0ZHP1	GAMYB-binding protein
17.2068	18.0526	17.6499	17.2812	17.0307	17.642	17.5705	17.6843	17.637	18.5252	18.2864	17.874	18.4211	18.5295	18.3028	17.8793	M0ZHP1	GAMYB-binding protein
14.7219	15.1014	15.0638	14.8711	14.4728	15.3117	15.39	15.4337	15.1585	15.4682	15.2222	15.7172	15.5603	15.6771	15.371	15.743	M0ZHS4	ENTH domain-containing protein
12.713	12.9569	12.7618	12.7329	12.5146	12.9662	13.5275	13.2811	12.9251	13.2913	13.1953	13.5539	13.558	13.6674	13.3193	13.8018	M0ZHS4	ENTH domain-containing protein
11.9551	12.5905	12.5035	12.3737	11.8604	12.7953	9.39377	10.5261	11.9525	12.7065	12.3485	12.0534	12.9789	12.9537	12.8016	12.6283	M0ZHT2	RING-type E3 ubiquitin transferase
10.1206	9.90121	14.9625	8.77757	9.0649	9.89191	10.3531	10.0773	14.1458	14.7109	10.9797	14.6086	14.1563	9.56046	11.2757	10.2711	M0ZHX2	Auxin-regulated protein
9.52961	9.35998	14.9625	10.1709	9.82016	10.6305	9.41421	10.903	14.1458	14.7109	10.3686	14.6086	14.1563	11.0788	10.3419	10.6707	M0ZHX3	Auxin-regulated protein
12.5334	12.8596	10.3234	10.3248	11.3392	12.3747	11.4079	12.6805	11.177	11.6724	11.29	11.7773	9.81835	9.16708	10.8395	9.31226	M0ZI81	50S ribosomal protein L12, chloroplastic
15.073	15.3246	15.5216	15.3456	9.23291	15.5293	15.5791	15.5283	10.2809	10.5943	9.88967	10.0561	15.7073	10.575	15.3808	15.6039	M0ZI84	PWWP domain-containing protein
10.0865	9.04224	14.5398	14.6019	9.61784	10.5995	9.38807	10.4753	14.8034	15.2474	10.1351	15.2554	10.915	10.8333	11.0859	10.293	M0ZI84	PWWP domain-containing protein
13.0849	11.1527	13.5458	13.3729	10.5314	13.5056	13.6594	13.4161	13.9872	14.3613	14.2138	14.6538	14.5915	14.5602	14.1994	14.55	M0ZI84	PWWP domain-containing protein
13.5738	13.9583	14.2804	13.9073	13.2422	14.129	14.0522	14.036	13.0977	13.5115	10.9949	13.7421	12.7571	11.2672	10.0778	11.558	M0ZI84	PWWP domain-containing protein
15.2621	16.0891	15.7422	15.4063	15.3279	16.1025	16.2409	15.8694	15.7161	15.9191	16.0402	16.59	16.4677	16.4145	16.1242	16.6225	M0ZIA6	Potassium transporter;High-affinity potassium transporter protein 1;High-affinity potassium transporter protein 1
15.2621	16.0891	15.7422	15.4063	15.3279	16.1025	16.2409	15.8694	15.7161	15.9191	16.0402	16.59	16.4677	16.4145	16.1242	16.6225	M0ZIA7	Potassium transporter;High-affinity potassium transporter protein 1;High-affinity potassium transporter protein 1
15.2621	16.0891	15.7422	15.4063	15.3279	16.1025	16.2409	15.8694	15.7161	15.9191	16.0402	16.59	16.4677	16.4145	16.1242	16.6225	M0ZIA8	Potassium transporter;High-affinity potassium transporter protein 1;High-affinity potassium transporter protein 1
15.1187	15.5453	15.6171	15.2144	14.8513	15.5787	15.7933	15.7556	15.2501	15.6922	15.6207	16.1631	16.1662	16.1415	15.8621	16.3432	M0ZIA6	Potassium transporter;High-affinity potassium transporter protein 1;High-affinity potassium transporter protein 1
15.1187	15.5453	15.6171	15.2144	14.8513	15.5787	15.7933	15.7556	15.2501	15.6922	15.6207	16.1631	16.1662	16.1415	15.8621	16.3432	M0ZIA7	Potassium transporter;High-affinity potassium transporter protein 1;High-affinity potassium transporter protein 1
15.1187	15.5453	15.6171	15.2144	14.8513	15.5787	15.7933	15.7556	15.2501	15.6922	15.6207	16.1631	16.1662	16.1415	15.8621	16.3432	M0ZIA8	Potassium transporter;High-affinity potassium transporter protein 1;High-affinity potassium transporter protein 1
15.1133	15.308	15.5157	14.4543	14.8795	15.1341	16.2643	15.5209	14.9644	15.1914	15.1718	15.6038	15.3928	15.3932	15.0391	15.4029	M0ZID4	Polyribonucleotide nucleotidyltransferase
15.1133	15.308	15.5157	14.4543	14.8795	15.1341	16.2643	15.5209	14.9644	15.1914	15.1718	15.6038	15.3928	15.3932	15.0391	15.4029	M0ZID5	Polyribonucleotide nucleotidyltransferase
15.6637	15.8703	16.0627	16.0768	15.3343	16.0603	16.2934	16.1852	9.97098	16.2653	16.0749	16.3794	16.3243	16.2927	16.1529	10.4803	M0ZIE8	CASP-like protein
12.1356	11.9863	12.1663	12.2472	11.8612	12.2253	12.552	12.3635	12.4088	12.3275	12.4008	12.5133	12.5255	12.6846	12.4623	12.6282	M0ZIJ3	Uncharacterized protein
12.1356	11.9863	12.1663	12.2472	11.8612	12.2253	12.552	12.3635	12.4088	12.3275	12.4008	12.5133	12.5255	12.6846	12.4623	12.6282	M0ZIJ4	Uncharacterized protein
14.829	15.2274	15.3494	15.0123	14.8467	15.3621	15.4992	15.4486	15.5153	15.6779	15.5091	15.695	16.8501	17.0266	16.7487	17.018	M0ZIM4	Sugar transporter
14.829	15.2274	15.3494	15.0123	14.8467	15.3621	15.4992	15.4486	15.5153	15.6779	15.5091	15.695	16.8501	17.0266	16.7487	17.018	M0ZIM5	Sugar transporter
14.1544	14.4981	11.4513	9.80195	9.00837	15.1059	10.0985	15.0822	14.9141	15.1546	14.9602	15.1263	16.4083	16.5651	16.3022	16.6617	M0ZIM4	Sugar transporter
14.1544	14.4981	9.81787	9.43586	11.1279	15.1059	9.44886	15.0822	14.9141	15.1546	14.9602	15.1263	16.4083	16.5651	16.3022	16.6617	M0ZIM5	Sugar transporter
10.0172	14.1682	10.2472	13.9144	13.9269	14.4231	10.9965	9.7645	13.8378	11.0198	10.4419	10.4394	14.0986	14.1594	13.8122	11.7809	M0ZIU4	Uncharacterized protein
13.8528	14.2241	14.2594	10.6335	14.38	14.676	14.7301	14.8891	8.13484	13.1659	13.637	13.7413	13.7593	9.48676	13.6471	14.1409	M0ZIU4	Uncharacterized protein
13.4668	13.9011	13.7203	13.5802	12.9451	13.6938	13.9795	13.8667	13.4626	14.0632	13.8948	13.9943	14.2727	14.2453	13.8597	14.6106	M0ZJ28	Nitrate transporter NRT1.1
13.4668	13.9011	13.7203	13.5802	12.9451	13.6938	13.9795	13.8667	13.4626	14.0632	13.8948	13.9943	14.2727	14.2453	13.8597	14.6106	M0ZJ29	Nitrate transporter NRT1.1
13.4668	13.9011	13.7203	13.5802	12.9451	13.6938	13.9795	13.8667	13.4626	14.0632	13.8948	13.9943	14.2727	14.2453	13.8597	14.6106	M0ZJ30	Nitrate transporter NRT1.1
12.39	11.2293	10.5041	9.93507	10.4372	12.7715	8.69361	12.8891	12.2876	11.8264	12.7458	10.8475	13.2854	12.9819	11.0165	13.2247	M0ZJ33	Phosphatase Psc923
12.1768	12.1512	12.4336	12.2924	12.1876	12.1451	12.5026	12.3026	12.1534	12.4748	12.4016	12.4304	11.9688	12.335	12.0955	12.1746	M0ZJ84	Glycine-rich RNA binding protein
10.8079	10.9914	10.4351	14.305	10.3651	14.4033	13.5823	14.0099	11.2958	14.1839	12.1138	10.0991	12.9275	14.3658	13.7331	13.9033	M0ZJ84	Glycine-rich RNA binding protein
9.79505	10.0265	10.6031	10.1782	11.279	11.7422	10.0422	10.7396	11.3288	9.37842	11.17	10.0679	11.9979	10.5762	11.738	12.0695	M0ZJD6	Phosphatidylinositol transporter
13.2035	13.5351	13.6383	9.73217	13.0586	10.4924	14.0695	9.64039	11.3786	14.0926	14.0767	9.64528	14.1925	10.5308	10.1342	11.5894	M0ZJK8	Ran GTPase binding protein
15.1236	15.1164	15.3933	14.8879	14.9042	14.9741	16.5467	15.6895	15.0225	15.3916	15.5575	15.8529	15.6275	15.6991	15.3741	15.9623	M0ZJL2	Protein kinase
17.1165	17.4495	17.4366	17.2353	16.7884	17.3792	17.5929	17.561	16.9469	17.3757	17.1664	17.6079	17.4438	17.3917	17.2633	17.6211	M0ZJL6	BZIP transcriptional activator RSG
14.6791	15.4835	15.3152	15.0873	14.847	15.4236	15.9907	15.8349	14.8167	10.2875	10.5388	15.7983	15.6181	15.6244	15.6364	15.8811	M0ZJL6	BZIP transcriptional activator RSG
19.375	19.763	19.8672	20.1269	18.9398	20.0509	19.606	19.9607	19.4704	19.7568	18.7008	19.4098	18.9429	19.6643	19.3894	19.5703	M0ZJM5	CHUP1 (CHLOROPLAST UNUSUAL POSITIONING 1)
14.6461	14.7181	14.9869	9.98313	14.4591	10.3647	15.1175	15.0367	14.8246	14.8594	14.661	15.1747	14.8985	14.998	14.8088	15.0267	M0ZJM5	CHUP1 (CHLOROPLAST UNUSUAL POSITIONING 1)
13.2037	14.3863	12.024	14.6594	14.3871	14.8316	14.6995	14.9896	14.6822	14.4608	13.7287	14.2705	14.7975	15.2323	15.2865	15.3797	M0ZJM5	CHUP1 (CHLOROPLAST UNUSUAL POSITIONING 1)
13.2037	14.3863	12.024	14.6594	14.3871	14.8316	14.6995	14.9896	14.6822	14.4608	13.7287	14.2705	14.7975	15.2323	15.2865	15.3797	M0ZJM5	CHUP1 (CHLOROPLAST UNUSUAL POSITIONING 1)
18.1477	18.4728	18.5409	18.4253	17.8448	18.4581	18.4575	18.6042	18.7056	18.9151	18.7907	19.3527	19.367	19.3628	19.1816	19.5993	M0ZJM5	CHUP1 (CHLOROPLAST UNUSUAL POSITIONING 1)
16.8823	16.9578	17.2948	17.0289	17.0155	17.4045	17.5846	17.6249	17.1128	17.1875	16.9994	17.5522	17.5084	17.5072	17.3153	17.5936	M0ZJM5	CHUP1 (CHLOROPLAST UNUSUAL POSITIONING 1)
15.6699	16.1442	16.4216	16.215	15.6733	16.4952	16.7549	16.547	15.9507	16.6525	16.0514	16.6474	17.1344	17.2195	16.9522	17.2302	M0ZJM5	CHUP1 (CHLOROPLAST UNUSUAL POSITIONING 1)
13.7061	14.0605	14.3126	13.4659	13.4288	14.0624	14.2287	14.3535	14.7244	15.2424	14.9056	15.4357	15.2825	15.146	14.8641	15.3073	M0ZJR0	Gc-rich sequence DNA-binding factor
9.27359	10.1753	9.16424	10.1468	9.57986	10.1899	9.24257	9.12224	10.9802	10.7104	10.7355	11.2064	11.0038	11.1817	10.888	11.0265	M0ZJR0	Gc-rich sequence DNA-binding factor
15.0029	15.2831	15.5123	14.4721	14.7836	15.0842	16.505	15.6909	14.7785	14.9731	15.0765	15.4044	15.4096	15.5063	14.8227	15.6726	M0ZJY9	Thylakoid-bound ascorbate peroxidase 6
12.1473	12.2148	10.1923	10.1433	12.4722	12.4822	12.3384	11.9449	11.6029	10.4517	9.77039	10.7994	10.0898	9.4656	10.172	12.3071	M0ZJY9	Thylakoid-bound ascorbate peroxidase 6
17.3903	17.63	17.8322	17.6853	17.2557	17.8596	17.8079	17.866	17.4346	17.7747	17.5124	17.558	17.4107	17.5791	17.2581	17.4463	M0ZK51	Phosphoglycerate mutase (2,3-diphosphoglycerate-independent)
13.3422	13.8484	13.6696	13.7122	12.8607	13.6354	13.3412	13.8379	13.9591	14.1029	13.8123	14.3052	13.6594	13.8579	13.6099	13.6353	M0ZKC0	Calcium-dependent protein kinase 3
13.3422	13.8484	13.6696	13.7122	12.8607	13.6354	13.3412	13.8379	13.9591	14.1029	13.8123	14.3052	13.6594	13.8579	13.6099	13.6353	M0ZKC1	Calcium-dependent protein kinase 3
17.746	17.9893	17.9342	17.2717	17.5945	17.8846	18.0507	18.034	18.07	18.1437	18.0101	18.2628	18.1897	18.2736	18.0818	18.2683	M0ZKN5	DNA topoisomerase I
15.4594	15.6467	15.8432	15.2883	15.1656	15.7178	15.7372	15.8803	16.3958	16.7381	16.4916	16.8799	16.398	16.5277	16.4438	16.5836	M0ZKN5	DNA topoisomerase I
10.889	13.1875	9.36616	10.374	12.8432	10.0641	13.5822	13.5455	12.4722	10.7837	12.8235	10.7024	11.1783	13.181	12.9261	10.7407	M0ZKN5	DNA topoisomerase I
9.34538	13.1875	9.42671	9.49173	12.8432	10.331	13.5822	13.5455	12.4722	9.49085	12.8235	11.2258	11.3227	13.181	12.9261	11.9432	M0ZKN5	DNA topoisomerase I
10.4583	9.96471	10.7196	9.631	10.6417	10.6532	10.6084	11.0794	11.7678	11.7909	11.6322	11.8063	11.9708	11.6484	10.6588	10.231	M0ZKU0	Zinc knuckle (CCHC-type) family protein
11.2346	9.96471	10.7196	9.631	10.6417	10.6532	10.6084	11.0794	11.7678	11.7909	11.6322	11.8063	11.9708	11.6484	11.6634	10.5155	M0ZKU1	Zinc knuckle (CCHC-type) family protein
11.7996	12.1627	10.9059	9.95805	10.3415	9.5134	10.8588	10.43	11.8818	12.1419	12.1781	12.8434	11.9266	11.963	11.7182	11.7768	M0ZKX5	FK506-binding protein
15.543	15.7046	15.582	15.4397	15.4106	15.5428	15.7458	15.5976	15.4803	15.5193	15.4015	15.3939	15.0179	14.912	14.974	15.0529	M0ZKY0	Arf gtpase-activating protein
14.7071	14.7566	14.843	14.1976	14.1631	14.5304	15.2438	14.9613	14.6157	14.8914	14.9644	15.1307	15.0843	15.2394	14.794	15.3139	M0ZLD1	BRASSINOSTEROID INSENSITIVE 1-associated receptor kinase 1
15.8592	16.1094	16.1867	16.0372	15.413	15.8656	16.4576	16.0982	16.1484	16.2229	16.2334	16.4274	16.4801	16.6356	16.1975	16.6836	M0ZLE5	Inositol hexakisphosphate and diphosphoinositol-pentakisphosphate kinase
9.30818	13.4846	13.4475	13.4313	13.8282	14.1357	13.4588	13.3637	14.4336	13.8791	14.6927	14.7766	14.5381	14.8137	14.3932	12.5437	M0ZLE5	Inositol hexakisphosphate and diphosphoinositol-pentakisphosphate kinase
15.1529	10.7692	15.5679	9.56006	15.276	15.6756	15.6458	15.7337	10.6651	15.7325	15.5553	15.7217	16.5528	16.6211	16.4458	10.4395	M0ZLK9	Uncharacterized protein
15.1529	10.5185	15.5679	8.12724	15.276	15.6756	15.6458	15.7337	10.0466	15.7325	15.5553	15.7217	16.5528	16.6211	16.4458	10.5589	M0ZLL1	Uncharacterized protein
14.582	14.636	15.0478	14.7227	14.7756	15.0958	16.137	15.5961	14.7536	15.2069	15.2687	15.5278	15.6706	15.7387	15.4425	15.8105	M0ZLQ3	FERONIA receptor-like kinase
13.1302	13.4253	13.632	10.5413	13.1951	13.932	14.6621	14.1278	13.8454	14.2729	14.1459	14.5641	14.3481	14.4499	14.0486	11.5647	M0ZLQ3	FERONIA receptor-like kinase
11.7423	12.2649	11.4324	10.301	11.7892	12.0704	12.4943	12.4811	12.6734	12.3725	12.414	12.5112	13.146	13.0574	13.3471	13.5314	M0ZLQ3	FERONIA receptor-like kinase
11.7423	12.2649	11.4324	8.96565	11.7892	12.0704	12.4943	12.4811	12.6734	12.3725	12.414	12.5112	13.146	13.0574	13.3471	13.5314	M0ZLQ3	FERONIA receptor-like kinase
10.9741	11.2326	11.5019	10.6664	10.3627	10.9941	11.4099	11.3506	12.0762	12.1752	12.2904	12.7612	12.4118	12.1846	12.0382	12.417	M0ZLV7	SIN3 component, histone deacetylase complex;SIN3 component, histone deacetylase complex
10.9741	11.2326	11.5019	10.6664	10.3627	10.9941	11.4099	11.3506	12.0762	12.1752	12.2904	12.7612	12.4118	12.1846	12.0382	12.417	M0ZLV8	SIN3 component, histone deacetylase complex;SIN3 component, histone deacetylase complex
15.2904	15.6268	15.7778	15.7309	15.4883	16.121	16.3215	16.3071	15.2796	15.7281	15.5255	15.7612	15.5388	15.5997	15.4618	15.572	M0ZM11	SPX, N-terminal;EXS, C-terminal;SPX, N-terminal;EXS, C-terminal
15.2904	15.6268	15.7778	15.7309	15.4883	16.121	16.3215	16.3071	15.2796	15.7281	15.5255	15.7612	15.5388	15.5997	15.4618	15.572	M0ZM12	SPX, N-terminal;EXS, C-terminal;SPX, N-terminal;EXS, C-terminal
15.6202	15.7862	16.2616	16.002	15.8516	16.155	9.97061	16.0659	15.6174	15.8633	15.6188	15.6968	15.9166	16.1861	15.9401	15.9743	M0ZM13	Pro-resilin
10.124	12.2591	12.998	9.2368	12.8834	9.69508	13.213	13.1266	13.0475	13.8313	13.5388	13.1318	13.4	13.5853	13.1882	13.461	M0ZM13	Pro-resilin
13.0158	13.196	13.5868	12.8788	12.9388	12.9252	13.3792	13.1091	13.2786	13.3393	13.5656	14.1272	14.5646	14.4627	14.2982	14.2634	M0ZMC5	Ammonium transporter
11.3833	11.1235	11.0076	12.2604	9.05594	9.85425	11.2494	10.6204	12.1725	12.4233	12.5251	11.6541	12.7925	13.3362	12.6606	11.725	M0ZMC5	Ammonium transporter
11.8912	10.1363	12.5298	12.1904	11.4053	11.9093	12.6885	12.2277	11.757	10.6998	11.8884	12.4327	10.9419	11.2992	11.3452	9.94817	M0ZMD0	Protein-serine/threonine phosphatase;Protein phosphatase 2c;Protein-serine/threonine phosphatase
11.8912	10.2929	12.5298	12.1904	11.4053	11.9093	12.6885	12.2277	11.757	10.8225	11.8884	12.4327	11.2879	12.0277	11.3452	11.0087	M1C4H1	Protein-serine/threonine phosphatase;Protein phosphatase 2c;Protein-serine/threonine phosphatase
11.8912	10.9917	12.5298	12.1904	11.4053	11.9093	12.6885	12.2277	11.757	10.1812	11.8884	12.4327	11.3777	9.86653	11.3452	11.3252	M1C4H2	Protein-serine/threonine phosphatase;Protein phosphatase 2c;Protein-serine/threonine phosphatase
15.5257	16.0124	16.1915	15.9603	15.472	16.251	16.8417	16.6039	15.4726	16.0786	16.0026	16.2636	16.3659	16.485	16.0487	16.5002	M0ZMD9	RAB GTPase activator
11.7506	11.3183	11.2212	10.628	9.18879	11.1388	10.5226	9.72562	11.3389	10.9031	11.2427	11.5085	11.9362	11.1628	11.4612	11.6132	M0ZMN4	High mobility group protein
10.0702	14.061	13.5412	14.2903	13.2877	13.2948	14.2902	13.3263	14.2799	15.0044	14.8851	14.4427	15.0008	14.9506	14.2627	14.1175	M0ZMN7	Catalase
12.9613	13.1665	13.3482	13.252	12.6552	13.363	13.552	13.4772	13.4544	13.6626	13.7186	13.9242	13.8638	13.8132	13.6675	13.9002	M0ZMN7	Catalase
13.7382	14.0784	14.2973	14.2452	13.9538	14.5587	14.8551	14.7292	13.8982	13.9963	14.1069	14.299	14.1586	14.1695	13.9845	14.2653	M0ZMU6	Auxin-induced SAUR;CTP synthase (glutamine hydrolyzing)
13.7382	14.0784	14.2973	14.2452	13.9538	14.5587	14.8551	14.7292	13.8982	13.9963	14.1069	14.299	14.1586	14.1695	13.9845	14.2653	M0ZMU8	Auxin-induced SAUR;CTP synthase (glutamine hydrolyzing)
12.3882	12.6236	9.4808	12.1873	9.69889	10.8754	9.80991	9.95877	10.4142	10.2061	10.7521	10.7698	11.6198	11.7111	11.5724	11.6154	M0ZMZ6	Ubiquitin-protein ligase BRE1A
9.68075	13.5595	13.5595	13.308	12.3711	13.3665	13.6558	13.6569	12.8936	13.2835	13.2083	13.5844	13.4334	13.7413	13.0493	13.368	M0ZN08	DNA binding protein
10.8449	13.5595	13.5595	13.308	12.3711	13.3665	13.6558	13.6569	12.8936	13.2835	13.2083	13.5844	13.4334	13.7413	13.0493	13.368	M0ZN09	DNA binding protein
13.8415	13.9897	14.2629	14.1154	13.5058	13.5113	14.1957	12.6573	14.2396	14.552	14.3326	14.6407	14.1494	14.2161	12.9804	14.1399	M0ZN15	Receptor protein kinase
13.8415	13.9897	14.2629	14.1154	13.5058	13.5113	14.1957	12.6573	14.2396	14.552	14.3326	14.6407	14.1494	14.2161	12.9804	14.1399	M0ZN16	Receptor protein kinase
9.97858	11.589	13.3849	9.21016	12.7314	12.5314	13.284	12.9817	9.90704	10.0596	13.1536	10.1111	10.6115	11.2873	12.7401	10.508	M0ZN15	Receptor protein kinase
10.3675	9.86988	13.3849	9.5026	12.7314	12.5314	13.284	12.9817	9.83124	10.3337	13.1536	9.88687	9.48305	10.0338	12.7401	11.2554	M0ZN16	Receptor protein kinase
19.4997	19.5992	19.86	19.2809	19.5797	19.6689	19.9885	20.0483	19.5273	19.8652	19.6393	19.8498	19.6759	19.8745	19.5208	19.7946	M0ZN23	Eukaryotic translation initiation factor 3 subunit B
16.9423	16.8732	17.003	17.6416	17.0638	17.7506	17.8726	17.6804	17.1773	17.816	17.595	18.0324	17.5294	18.0252	17.8896	18.0363	M0ZN55	RNA binding protein
16.9423	16.8732	17.003	17.6416	17.0638	17.7506	17.8726	17.6804	17.1773	17.816	17.595	18.0324	17.5294	18.0252	17.8896	18.0363	M0ZN56	RNA binding protein
17.8997	18.0716	18.2063	18.2431	18.0211	18.5137	18.4601	18.506	17.9526	18.176	18.0082	18.3509	17.9781	18.0293	17.8812	18.0227	M0ZN99	Eukaryotic translation initiation factor 4g
18.3708	18.7232	18.6098	18.4895	18.1733	18.216	18.5188	18.4043	18.0566	18.0392	17.9642	18.0966	17.4636	17.4213	17.4912	17.3917	M0ZN99	Eukaryotic translation initiation factor 4g
16.8788	17.0426	17.0778	17.0762	16.6108	17.1394	17.2713	17.2082	16.6633	17.0268	16.8613	16.9834	17.2126	17.1973	17.0706	17.2836	M0ZN99	Eukaryotic translation initiation factor 4g
15.5392	15.7883	16.0634	13.6298	15.8116	16.0931	16.1946	16.2861	15.498	15.7924	15.5326	15.8367	15.5466	15.7617	15.4414	15.7321	M0ZN99	Eukaryotic translation initiation factor 4g
10.6775	14.2259	14.3493	13.9579	9.28814	14.3826	15.0071	14.755	14.2951	14.5961	14.5962	14.7356	9.56177	12.0016	14.5335	14.9014	M0ZN99	Eukaryotic translation initiation factor 4g
14.2181	14.3016	14.4553	14.4447	14.1325	14.6442	14.7865	14.6054	13.8034	14.3198	14.0235	14.3971	13.8605	13.9889	13.9122	14.0221	M0ZN99	Eukaryotic translation initiation factor 4g
14.6006	15.0435	15.2255	14.982	13.6186	14.6893	14.968	14.8154	14.3729	14.9729	14.9468	15.2121	14.6269	14.7468	14.4585	14.8028	M0ZNC3	Uncharacterized protein
12.4634	12.7936	13.0213	12.849	12.5145	12.9961	13.0737	12.9654	13.1843	13.3379	13.3606	13.3815	13.8122	13.7699	13.6239	13.7629	M0ZNH3	Zinc finger family protein
12.4634	12.7936	13.0213	12.849	12.5145	12.9961	13.0737	12.9654	13.1843	13.3379	13.3606	13.3815	13.8122	13.7699	13.6239	13.7629	M0ZNH4	Zinc finger family protein
12.7585	10.4016	13.258	12.8463	12.9665	11.8168	14.2739	13.9311	14.0514	14.092	14.2617	14.5749	14.7595	14.9859	14.4318	14.9598	M0ZNL5	Glutathione s-transferase
13.2204	8.73636	13.4146	11.9564	13.041	13.5654	14.2182	14.0423	13.8484	14.1634	14.1894	14.5739	14.5185	14.597	14.3605	14.6564	M0ZNP2	Uncharacterized protein
13.2204	10.5458	13.4146	11.9564	13.041	13.5654	14.2182	14.0423	13.8484	14.1634	14.1894	14.5739	14.5185	14.597	14.3605	14.6564	M0ZNP2	Uncharacterized protein
14.1388	15.2172	15.3251	14.3785	15.0668	15.2396	15.485	15.6083	12.693	12.7811	13.1827	12.6829	12.5566	11.1481	12.7029	12.1755	M0ZNT4	NAK-type protein kinase
12.6727	13.018	9.95633	13.1963	9.30723	12.8063	12.2612	13.1155	12.0343	10.2369	12.4176	12.6894	10.9143	12.5654	12.39	11.0955	M0ZNT4	NAK-type protein kinase
15.5939	15.8221	16.3829	16.2486	15.6876	16.1659	16.264	16.239	16.1469	16.4497	16.2087	16.5555	15.9654	16.4976	16.3155	16.4632	M0ZPH6	BZIP transcription factor bZIP114
15.5939	15.8221	16.3829	16.2486	15.6876	16.1659	16.264	16.239	16.1469	16.4497	16.2087	16.5555	15.9654	16.4976	16.3155	16.4632	M0ZPH7	BZIP transcription factor bZIP114
13.4146	13.7226	13.9759	13.8163	13.2412	13.7997	13.8742	13.9457	13.4194	13.8116	13.2822	13.8423	13.7498	13.3953	13.6006	13.6479	M0ZPH6	BZIP transcription factor bZIP114
13.4146	13.7226	13.9759	13.8163	13.2412	13.7997	13.8742	13.9457	13.4194	13.8116	13.2822	13.8423	13.7498	13.3953	13.6006	13.6479	M0ZPH7	BZIP transcription factor bZIP114
17.4057	17.6677	17.8359	17.741	17.2309	17.7963	17.837	18.0042	17.3786	17.9198	17.4822	17.5023	17.3955	17.7055	17.3729	17.7291	M0ZPT4	Glycine cleavage system H protein
18.7397	19.0573	19.1081	19.1946	18.6832	19.2211	19.4166	19.2993	18.8162	19.3057	19.0252	19.2812	19.4284	19.4466	19.2593	19.5317	M0ZPZ1	Pumilio
16.5056	16.8369	11.2083	8.84987	16.0246	16.4048	10.3135	10.974	16.2905	16.6309	16.482	16.9126	11.1001	11.2633	15.915	16.311	M0ZPZ1	Pumilio
16.5056	16.8369	10.7397	10.3904	16.0246	16.4048	11.9643	11.1505	16.2905	16.6309	16.482	16.9126	11.7184	10.3195	15.915	16.311	M0ZPZ1	Pumilio
16.053	18.4667	18.3617	18.3946	15.7359	18.4392	16.5478	18.5207	18.1527	18.4895	18.188	18.3692	18.2428	18.3749	18.2975	18.3846	M0ZPZ1	Pumilio
16.4632	16.5818	16.8628	13.0789	16.4764	17.0164	16.8981	16.9384	16.0976	16.6879	16.4057	16.6832	13.5762	16.616	16.3149	16.5641	M0ZPZ1	Pumilio
16.4632	16.5818	16.8628	13.0789	16.4764	17.0164	16.8981	16.9384	16.0976	16.6879	16.4057	16.6832	13.5762	16.616	16.3149	16.5641	M0ZPZ1	Pumilio
16.0884	16.3416	16.4898	15.749	15.5855	16.1454	17.0562	16.524	15.6144	15.901	15.8587	16.3637	16.0019	15.942	15.4805	15.9257	M0ZPZ1	Pumilio
10.227	10.5949	13.2857	10.1172	11.8697	10.5723	9.67162	11.094	12.6998	12.9253	13.0595	10.683	10.9313	11.1433	13.084	13.5687	M0ZPZ4	PTAC16
10.4082	14.2872	14.5373	14.5826	9.69673	11.0132	14.6987	10.3384	11.5445	14.0164	10.9419	11.6894	9.87767	10.1435	10.4096	9.75569	M0ZQA9	Uncharacterized protein
10.7198	12.011	10.7599	11.0523	9.79411	10.6216	11.248	11.0182	10.6877	11.0442	10.0603	11.1772	12.0975	12.1274	11.5557	12.3357	M0ZR27	Mitogen-activated protein kinase
15.0164	15.506	15.6437	15.2644	14.9006	15.52	16.0513	15.8109	15.6312	16.0865	16.0302	16.368	16.2781	16.2897	15.9555	16.3657	M0ZR95	C2H2L domain class transcription factor;DNA/RNA binding protein;DNA/RNA binding protein
15.0164	15.506	15.6437	15.2644	14.9006	15.52	16.0513	15.8109	15.6312	16.0865	16.0302	16.368	16.2781	16.2897	15.9555	16.3657	M1A1B7	C2H2L domain class transcription factor;DNA/RNA binding protein;DNA/RNA binding protein
15.0164	15.506	15.6437	15.2644	14.9006	15.52	16.0513	15.8109	15.6312	16.0865	16.0302	16.368	16.2781	16.2897	15.9555	16.3657	M1A1B8	C2H2L domain class transcription factor;DNA/RNA binding protein;DNA/RNA binding protein
10.5056	10.4293	14.7678	14.4176	9.6874	10.5381	9.60737	9.09608	10.7789	13.2138	9.83449	11.0698	14.5898	11.2251	14.8054	14.4123	M0ZRF0	LysM type receptor kinase
12.6252	13.3202	13.1715	13.6129	9.91154	13.7718	12.562	13.1316	13.7824	14.0703	12.6255	12.8987	12.6403	10.5976	13.8665	13.9777	M0ZRW4	PDR8/PEN3 (PLEIOTROPIC DRUG RESISTANCE8)
12.6252	13.3202	13.1715	13.6129	9.88413	13.7718	12.562	13.1316	13.7824	14.0703	12.6255	12.8987	12.6403	11.7743	13.8665	13.9777	M0ZRW6	PDR8/PEN3 (PLEIOTROPIC DRUG RESISTANCE8)
14.6795	14.8766	14.8702	14.433	13.8652	14.6002	14.8323	14.7929	14.3163	14.8011	14.4272	14.7354	14.4316	14.7002	14.464	14.7952	M0ZS06	Btz domain-containing protein
15.5709	15.9676	15.9246	15.0129	15.1859	11.7894	11.6363	15.5366	15.7051	15.9506	15.877	16.0673	15.6797	15.8923	15.8743	16.0151	M0ZS06	Btz domain-containing protein
17.5095	17.6388	17.7974	17.5048	17.1701	15.5458	17.2313	17.8249	17.4744	17.7443	17.489	17.8543	17.7073	17.6986	17.5485	17.7389	M0ZS08	Ran-binding protein
14.7374	14.8869	15.0081	15.0329	14.4018	14.792	15.0113	15.0791	14.113	14.4478	14.1434	14.5194	14.2611	9.96276	14.2626	14.3062	M0ZS08	Ran-binding protein
14.0287	14.2941	14.3889	10.2714	13.6306	14.0776	14.1183	14.1564	13.9402	14.2482	13.9003	14.2186	13.7917	13.9855	13.8153	13.9333	M0ZS08	Ran-binding protein
14.1862	14.5636	14.5149	11.6727	13.8023	14.0595	14.2414	14.5021	12.9652	12.2931	12.1193	12.8589	12.8331	12.6444	12.6884	12.9066	M0ZS08	Ran-binding protein
14.1862	14.5636	14.5149	11.6727	13.8023	14.0595	14.2414	14.5021	12.9652	12.2931	12.1193	12.8589	12.8331	12.6444	12.6884	12.9066	M0ZS08	Ran-binding protein
12.5515	11.6448	13.1976	12.7611	13.5816	13.8706	14.0553	9.76275	10.8383	12.1774	13.3447	13.5564	13.4867	10.3273	10.9888	11.6404	M0ZS11	Uncharacterized protein
12.7041	13.0577	13.1322	13.434	12.0226	13.0578	12.1463	13.1768	14.4009	14.3386	13.1481	13.4699	13.2108	14.2676	14.1451	14.4234	M0ZS67	Uncharacterized protein;FCP1 homology domain-containing protein
12.7041	13.0577	13.1322	13.434	12.0226	13.0578	12.1463	13.1768	14.4009	14.3386	13.1481	13.4699	13.2108	14.2676	14.1451	14.4234	M0ZS68	Uncharacterized protein;FCP1 homology domain-containing protein
11.9258	11.8796	11.4428	10.9332	12.0058	11.637	10.0242	12.0101	12.7042	11.6345	11.5854	11.8476	12.4016	11.5001	11.7524	12.4717	M0ZS67	Uncharacterized protein;FCP1 homology domain-containing protein
11.9258	11.8796	11.4428	10.9332	12.0058	11.637	10.0242	12.0101	12.7042	11.6345	11.5854	11.8476	12.4016	11.5001	11.7524	12.4717	M0ZS67	Uncharacterized protein;FCP1 homology domain-containing protein
11.9258	11.8796	11.4428	10.9332	12.0058	11.637	10.0242	12.0101	12.7042	11.6345	11.5854	11.8476	12.4016	11.5001	11.7524	12.4717	M0ZS68	Uncharacterized protein;FCP1 homology domain-containing protein
11.9258	11.8796	11.4428	10.9332	12.0058	11.637	10.0242	12.0101	12.7042	11.6345	11.5854	11.8476	12.4016	11.5001	11.7524	12.4717	M0ZS68	Uncharacterized protein;FCP1 homology domain-containing protein
16.2343	16.5114	16.568	16.6452	16.2435	16.5774	16.6591	16.5893	15.8752	15.9312	15.895	16.0605	16.3926	16.2283	16.1472	16.4825	M0ZT62	Nucleosome-binding protein
12.7501	13.3374	13.0275	13.0618	12.2012	12.991	13.1626	13.2509	12.4775	12.9171	12.8146	9.89722	13.1269	13.1354	12.8292	10.3969	M0ZT89	Chaperonin 21
12.1193	12.0294	12.3171	12.2031	12.1409	12.4316	12.7592	12.2854	11.8504	11.6502	11.2562	11.3813	11.7214	11.9393	11.0113	11.9729	M0ZT89	Chaperonin 21
17.4452	17.7501	17.8521	17.4256	17.3091	17.8038	18.0225	17.9162	17.7782	17.7643	17.8575	18.1237	17.397	18.0435	17.8294	18.0864	M0ZTH3	Serine/threonine-protein phosphatase
17.4452	17.7501	17.8521	17.4256	17.3091	17.8038	18.0225	17.9162	17.7782	17.7643	17.8575	18.1237	17.397	18.0435	17.8294	18.0864	M0ZTH3	Serine/threonine-protein phosphatase
13.3864	15.2586	14.9851	13.8144	9.98385	14.1072	15.7512	15.6395	14.796	15.9247	15.7636	14.4158	16.0773	15.512	15.3144	16.1313	M0ZTH3	Serine/threonine-protein phosphatase
10.5234	9.41695	12.3249	11.3814	9.85481	10.3287	10.8807	11.648	9.69453	12.498	12.4335	12.7809	13.5608	13.7049	10.8587	13.5273	M0ZTH3	Serine/threonine-protein phosphatase
19.4634	19.7375	19.7691	19.8121	19.3933	19.6929	19.8826	19.8442	19.11	19.4544	19.271	19.4629	19.2099	19.2324	19.17	19.3412	M0ZTN9	Ara4-interacting protein
19.4634	19.7375	19.7691	19.8121	19.3933	19.6929	19.8826	19.8442	19.11	19.4544	19.271	19.4629	19.2099	19.2324	19.17	19.3412	M0ZTP0	Ara4-interacting protein
16.8792	17.3146	17.0606	15.8247	16.6133	17.1178	17.4365	17.6293	16.9939	17.0119	16.8735	17.2785	17.35	17.3714	17.4736	17.779	M0ZTN9	Ara4-interacting protein
16.8792	17.3146	17.0606	15.8247	16.6133	17.1178	17.4365	17.6293	16.9939	17.0119	16.8735	17.2785	17.35	17.3714	17.4736	17.779	M0ZTN9	Ara4-interacting protein
16.8792	17.3146	17.0606	15.8247	16.6133	17.1178	17.4365	17.6293	16.9939	17.0119	16.8735	17.2785	17.35	17.3714	17.4736	17.779	M0ZTP0	Ara4-interacting protein
16.8792	17.3146	17.0606	15.8247	16.6133	17.1178	17.4365	17.6293	16.9939	17.0119	16.8735	17.2785	17.35	17.3714	17.4736	17.779	M0ZTP0	Ara4-interacting protein
15.7097	15.9469	15.9301	16.1231	15.1848	15.7502	15.8536	15.8739	11.8217	16.2651	10.2373	16.3824	15.9026	11.1215	15.8716	16.1237	M0ZTN9	Ara4-interacting protein
15.7097	15.9469	15.9301	16.1231	15.1848	15.7502	15.8536	15.8739	9.32122	16.2651	10.7991	16.3824	15.9026	9.66892	15.8716	16.1237	M0ZTP0	Ara4-interacting protein
13.6387	13.9628	13.9649	13.6795	13.0929	13.6451	14.6528	13.9247	12.8283	13.5381	13.2446	13.8179	13.5305	13.6607	13.3341	13.8411	M0ZTN9	Ara4-interacting protein
13.6387	13.9628	13.9649	13.6795	13.0929	13.6451	14.6528	13.9247	12.8283	13.5381	13.2446	13.8179	13.5305	13.6607	13.3341	13.8411	M0ZTP0	Ara4-interacting protein
13.1092	13.5048	13.3659	13.3107	12.9162	13.2972	13.292	13.2406	10.2279	11.8344	12.1032	12.121	12.0665	12.3343	10.8305	10.126	M0ZTQ8	Uncharacterized protein
11.3594	10.3869	11.535	9.56286	11.1495	11.7261	12.0354	9.44524	11.5812	9.75364	12.1646	12.1808	12.3634	10.3724	9.99907	12.4062	M0ZTV5	AML1
11.3594	9.63308	11.535	10.7023	11.1495	11.7261	12.0354	9.87414	11.5812	10.2404	12.1646	12.1808	12.3634	11.2113	11.4928	12.4062	M0ZTV6	AML1
18.3299	18.7506	18.8382	17.3812	18.2126	17.5811	19.0031	18.9766	18.6327	19.1324	18.8949	19.0325	18.9154	19.1166	18.7478	19.0137	M0ZU86	Nucleic acid binding protein
11.9602	11.9455	12.0052	12.0399	11.3759	11.4724	9.99266	11.8056	12.1619	12.3222	12.2288	12.2413	12.0891	12.0735	12.0462	11.9683	M0ZU92	ATP binding protein
16.7321	17.0141	17.1776	16.8205	16.5187	17.0252	17.6002	17.3723	16.4509	16.6947	16.8352	17.2084	17.1711	17.0901	16.7208	17.3019	M0ZUF4	Serine/threonine protein kinase pk23
12.0714	11.6014	12.5597	12.1401	10.9179	12.1848	10.802	10.0425	12.585	12.8494	12.775	13.1117	12.7675	12.9813	12.7181	13.0011	M0ZUP5	Negative cofactor 2 transcriptional co-repressor
12.0651	11.0441	11.1813	9.83408	10.4669	9.41221	10.2174	11.3766	12.178	12.6775	12.0668	12.6153	12.9347	12.5798	12.8164	12.9607	M0ZUP5	Negative cofactor 2 transcriptional co-repressor
15.4766	15.5794	16.0054	15.5597	15.8227	16.0778	16.3605	10.2644	16.3416	16.7711	16.5353	16.9182	16.6753	16.6128	16.4219	16.5753	M0ZUQ1	RNA binding protein
15.4766	15.5794	16.0054	15.5597	15.8227	16.0778	16.3605	10.9337	16.3416	16.7711	16.5353	16.9182	16.6753	16.6128	16.4219	16.5753	M0ZUQ3	RNA binding protein
15.4766	15.5794	16.0054	15.5597	15.8227	16.0778	16.3605	9.91154	16.3416	16.7711	16.5353	16.9182	16.6753	16.6128	16.4219	16.5753	M0ZUQ4	RNA binding protein
16.6743	16.931	17.0205	16.8719	16.1821	16.744	17.1862	17.0904	17.0118	17.4766	17.3091	17.8226	17.3482	17.3076	17.1892	17.5554	M0ZUX5	DNA double-strand break repair rad50 ATPase
13.7837	14.5511	13.3812	9.51167	11.208	13.6646	13.8703	14.6083	15.5065	14.6376	15.0929	15.7834	15.8259	15.4585	15.9611	16.3982	M0ZUX5	DNA double-strand break repair rad50 ATPase
13.7837	14.5511	13.3812	10.0279	9.99723	13.6646	13.8703	14.6083	15.5065	14.6376	15.0929	15.7834	15.8259	15.4585	15.9611	16.3982	M0ZUX5	DNA double-strand break repair rad50 ATPase
10.0034	14.2444	10.7624	10.5386	14.1332	14.8504	14.7748	9.88441	15.0324	15.3249	15.2838	15.5925	15.2502	15.3735	15.2388	15.5121	M0ZUX5	DNA double-strand break repair rad50 ATPase
13.9774	14.3531	14.3946	14.1819	13.1505	14.0723	14.2027	14.2137	14.2958	14.9557	14.6379	15.2002	14.4379	14.445	14.2394	14.5506	M0ZUX5	DNA double-strand break repair rad50 ATPase
10.3426	11.0507	12.2603	10.5436	11.1397	9.84704	9.79301	11.6814	12.8442	13.0923	12.64	13.1426	12.8193	12.8059	12.7159	12.897	M0ZUX5	DNA double-strand break repair rad50 ATPase
15.8279	16.1612	16.2417	15.9262	15.7373	16.1861	16.5145	16.308	16.4908	16.8588	16.6625	16.9106	16.9295	16.8768	16.6438	16.9451	M0ZUY6	Nucleic acid binding protein
14.763	14.9073	14.9747	14.8627	14.825	15.0628	15.1003	15.0158	14.494	14.8043	14.4134	14.7229	14.5163	14.5321	14.1882	14.4908	M0ZV44	Alba domain-containing protein
14.763	14.9073	14.9747	14.8627	14.825	15.0628	15.1003	15.0158	14.494	14.8043	14.4134	14.7229	14.5163	14.5321	14.1882	14.4908	M0ZV45	Alba domain-containing protein
14.763	14.9073	14.9747	14.8627	14.825	15.0628	15.1003	15.0158	14.494	14.8043	14.4134	14.7229	14.5163	14.5321	14.1882	14.4908	M0ZV46	Alba domain-containing protein
14.763	14.9073	14.9747	14.8627	14.825	15.0628	15.1003	15.0158	14.494	14.8043	14.4134	14.7229	14.5163	14.5321	14.1882	14.4908	M0ZV47	Alba domain-containing protein
13.3838	13.8154	14.3188	10.5761	9.41499	9.54615	13.2243	11.7796	13.4289	12.8907	13.349	10.5414	14.2413	13.6104	14.0511	10.484	M0ZV44	Alba domain-containing protein
13.3838	13.8154	14.3188	9.05164	9.03764	10.372	13.2243	10.0058	13.4289	12.8907	13.349	10.4334	14.2413	13.6104	14.0511	11.0774	M0ZV45	Alba domain-containing protein
13.3838	13.8154	14.3188	10.895	9.66136	10.686	13.2243	9.36074	13.4289	12.8907	13.349	10.4259	14.2413	13.6104	14.0511	10.2785	M0ZV46	Alba domain-containing protein
13.3838	13.8154	14.3188	10.4518	9.05665	11.1935	13.2243	10.6013	13.4289	12.8907	13.349	11.3503	14.2413	13.6104	14.0511	11.1039	M0ZV47	Alba domain-containing protein
10.4676	10.4284	10.1923	8.98364	9.61315	9.75663	10.5292	11.1498	12.7322	9.97022	12.7926	13.2889	13.0345	13.078	9.23704	13.1215	M0ZVM9	Fructose-bisphosphate aldolase
14.8249	15.1134	15.2548	15.3322	14.7809	15.3909	15.0646	15.2946	15.5904	15.741	15.4808	15.4764	15.5864	16.0026	15.5621	15.7127	M0ZVV8	Transformer-SR ribonucleoprotein
10.1748	10.6338	10.2561	9.39018	10.451	10.5368	10.2944	11.3499	10.8285	12.628	10.7472	10.0436	10.8668	9.83816	10.6986	10.221	M0ZVV8	Transformer-SR ribonucleoprotein
13.7574	14.1716	14.3179	13.709	13.334	14.2454	14.7127	14.4516	13.316	13.8835	13.8047	14.0347	13.8955	13.8852	13.5371	13.8235	M0ZWB1	Protein yrdA
15.1172	15.3237	15.4114	15.4063	14.8284	15.2399	15.4076	15.3578	15.1811	15.4887	15.3147	15.609	15.3902	15.3639	15.2907	15.3908	M0ZWG2	Protein RCC2
15.2196	15.3914	15.5074	15.4641	10.4627	15.5242	10.5344	15.6664	15.0375	15.5725	15.3289	15.7352	15.2524	15.2622	15.0355	11.3494	M0ZWG5	Iqd32 (IQ-domain 32);calmodulin binding;Iqd32 (IQ-domain 32);calmodulin binding
15.2196	15.3914	15.5074	15.4641	10.0617	15.5242	10.9662	15.6664	15.0375	15.5725	15.3289	15.7352	15.2524	15.2622	15.0355	11.3242	M0ZWG6	Iqd32 (IQ-domain 32);calmodulin binding;Iqd32 (IQ-domain 32);calmodulin binding
15.0585	10.3091	11.6518	9.04956	9.34373	9.86247	15.3459	9.89826	14.9116	10.2995	15.2547	15.6552	10.2391	14.7403	10.653	9.92442	M0ZWG5	Iqd32 (IQ-domain 32);calmodulin binding;Iqd32 (IQ-domain 32);calmodulin binding
15.0585	10.7651	10.9599	9.52505	11.3564	10.5613	15.3459	10.4305	14.9116	11.4323	15.2547	15.6552	10.2675	14.7403	11.1179	10.6818	M0ZWG6	Iqd32 (IQ-domain 32);calmodulin binding;Iqd32 (IQ-domain 32);calmodulin binding
9.96468	13.4054	13.6558	13.5753	8.64351	10.5604	13.7114	13.7412	13.2954	13.7113	10.817	13.7125	13.3797	13.1067	12.7116	12.9721	M0ZWG5	Iqd32 (IQ-domain 32);calmodulin binding;Iqd32 (IQ-domain 32);calmodulin binding
10.5094	13.4054	13.6558	13.5753	9.46892	10.4287	13.7114	13.7412	13.2954	13.7113	10.2483	13.7125	13.3797	13.1067	12.7116	12.9721	M0ZWG6	Iqd32 (IQ-domain 32);calmodulin binding;Iqd32 (IQ-domain 32);calmodulin binding
16.2805	16.5367	16.6321	17.2365	17.0058	17.5985	16.6567	16.6317	17.2901	17.7746	17.3016	16.2816	18.3507	18.9707	18.3153	17.6518	M0ZWJ3	Sugar transporter ERD6-like 6
15.9996	15.3861	14.9984	14.9024	15.03	11.4414	14.7116	14.8819	11.1763	10.8639	16.7053	16.0028	10.7119	17.256	11.3125	16.927	M0ZWJ3	Sugar transporter ERD6-like 6
15.4572	16.015	14.387	14.5632	15.2521	12.8088	13.5775	15.6078	15.0804	15.3757	15.0101	15.9304	11.3798	10.7108	14.2462	12.7059	M0ZWJ3	Sugar transporter ERD6-like 6
15.0727	13.4137	15.5968	15.0748	12.5484	13.1232	13.3101	15.2132	15.4322	15.5091	13.4204	15.9176	15.9949	15.9459	15.7326	15.9095	M0ZWL9	Bel1 homeotic protein
15.0727	13.4137	15.5968	15.0748	12.5484	13.1232	13.3101	15.2132	15.4322	15.5091	13.4204	15.9176	15.9949	15.9459	15.7326	15.9095	M0ZWM1	Bel1 homeotic protein
16.6493	17.0274	17.1506	16.859	15.7121	16.2708	16.7043	17.007	16.8897	16.8648	16.7471	17.6677	17.1083	17.1901	16.4656	17.261	M0ZWP6	Tetratricopeptide repeat protein, tpr
14.2805	14.483	14.834	14.7565	13.6443	14.6359	14.7722	14.9249	14.7154	15.1693	15.0522	15.4903	15.5119	15.568	15.0238	15.7974	M0ZWP6	Tetratricopeptide repeat protein, tpr
13.843	14.2526	14.474	9.4876	13.9078	14.5173	14.8613	14.7198	14.4641	14.7569	14.6679	14.9225	14.9586	15.1369	14.63	15.1049	M0ZWP6	Tetratricopeptide repeat protein, tpr
13.6827	13.8481	14.4717	13.725	13.0202	13.7937	14.8179	14.2649	13.7716	14.2505	14.2777	14.9935	14.3062	14.1683	13.9115	14.5318	M0ZWQ1	Lysine-specific histone demethylase
14.6943	9.68154	15.1981	14.6087	10.24	10.0852	10.1529	15.323	14.9711	10.181	9.75924	10.438	11.257	10.2367	14.9817	15.209	M0ZWY9	Synapse-associated protein
10.3441	10.6499	10.1283	10.2981	9.85433	10.2343	11.5055	10.6198	10.7354	10.4987	10.6582	10.2498	9.22345	10.4544	10.5961	10.6279	M0ZX44	Transcription initiation factor TFIID subunit 8
10.9945	10.9851	10.1283	10.6161	10.3661	9.75243	11.1942	10.6179	12.1321	10.4987	10.6582	9.7585	9.22345	10.4544	10.5961	9.67209	M0ZX45	Transcription initiation factor TFIID subunit 8
18.039	18.3269	18.4375	18.4201	17.5266	18.1441	18.3507	18.2402	18.1463	18.457	18.3959	18.6472	18.3256	18.4051	18.2638	18.4864	M0ZX56	p-glycoprotein
12.6406	12.9572	13.0253	12.6141	12.6435	13.0427	13.5178	13.3552	12.609	12.9737	12.8068	12.9357	13.0069	13.0483	12.7472	13.0401	M0ZX72	PIP5K9
17.3419	9.6743	17.7692	17.6417	17.1021	10.3139	10.5321	17.5805	17.4511	17.7951	17.4552	17.6597	17.4122	17.604	10.6559	17.5414	M0ZXA8	Acc synthase
13.3646	13.7521	13.4827	12.2527	12.9037	13.0825	13.4125	13.603	13.5926	13.4267	13.4967	13.7879	13.9998	14.0611	13.9804	14.5551	M0ZXD2	Uncharacterized protein
13.3646	13.7521	13.4827	12.2527	12.9037	13.0825	13.4125	13.603	13.5926	13.4267	13.4967	13.7879	13.9998	14.0611	13.9804	14.5551	M0ZXD3	Uncharacterized protein
13.3646	13.7521	13.4827	12.2527	12.9037	13.0825	13.4125	13.603	13.5926	13.4267	13.4967	13.7879	13.9998	14.0611	13.9804	14.5551	M0ZXD4	Uncharacterized protein
16.5323	16.9085	16.9327	16.5245	16.4726	17.1986	17.344	17.3178	16.6722	17.0021	16.7816	17.0177	16.7655	16.8838	16.5578	16.8162	M0ZXM9	TFIIS N-terminal domain-containing protein
16.5323	16.9085	16.9327	16.5245	16.4726	17.1986	17.344	17.3178	16.6722	17.0021	16.7816	17.0177	16.7655	16.8838	16.5578	16.8162	M0ZXN0	TFIIS N-terminal domain-containing protein
15.0071	15.1808	15.2261	15.4406	15.2136	15.6245	15.7174	15.7353	14.6989	10.0852	14.8422	14.877	14.7465	14.8204	14.7126	14.7895	M0ZXM9	TFIIS N-terminal domain-containing protein
15.0071	15.1808	15.2261	15.4406	15.2136	15.6245	15.7174	15.7353	14.6989	10.109	14.8422	14.877	14.7465	14.8204	14.7126	14.7895	M0ZXN0	TFIIS N-terminal domain-containing protein
14.0002	14.1156	14.2332	14.2507	14.1464	14.3745	14.5913	14.6232	13.5303	13.9292	13.6463	13.9018	13.4839	13.7234	13.5281	13.7005	M0ZXM9	TFIIS N-terminal domain-containing protein
14.0002	14.1156	14.2332	14.2507	14.1464	14.3745	14.5913	14.6232	13.5303	13.9292	13.6463	13.9018	13.4839	13.7234	13.5281	13.7005	M0ZXN0	TFIIS N-terminal domain-containing protein
13.1976	13.8189	13.4272	10.3364	13.4277	13.3265	13.9479	14.4129	13.1421	11.915	12.6062	13.5444	11.135	13.1892	13.3583	13.4309	M0ZXM9	TFIIS N-terminal domain-containing protein
13.1976	13.8189	13.4272	10.3364	13.4277	13.3265	13.9479	14.4129	13.1421	11.915	12.6062	13.5444	10.6685	13.1892	13.3583	13.4309	M0ZXM9	TFIIS N-terminal domain-containing protein
13.1976	13.8189	13.4272	10.3364	13.4277	13.3265	13.9479	14.4129	13.1421	11.915	12.6062	13.5444	10.4584	13.1892	13.3583	13.4309	M0ZXN0	TFIIS N-terminal domain-containing protein
13.1976	13.8189	13.4272	10.3364	13.4277	13.3265	13.9479	14.4129	13.1421	11.915	12.6062	13.5444	11.2131	13.1892	13.3583	13.4309	M0ZXN0	TFIIS N-terminal domain-containing protein
14.7374	14.947	14.9561	14.5191	14.6513	15.0696	15.221	14.5365	14.2015	14.5161	14.2425	14.1419	14.1624	14.0305	14.5424	14.0677	M0ZXM9	TFIIS N-terminal domain-containing protein
14.7374	14.947	14.9561	14.5191	14.6513	15.0696	15.221	14.5365	14.2015	14.5161	14.2425	14.1419	14.1624	14.0305	14.5424	14.0677	M0ZXN0	TFIIS N-terminal domain-containing protein
12.6212	13.0869	13.1616	12.8496	12.8859	13.4873	13.5061	13.297	13.0449	13.0652	13.3167	10.6842	13.851	13.7923	13.685	13.9305	M0ZXY4	Serine/threonine protein kinase
12.6212	13.0869	13.1616	12.8496	12.8859	13.4873	13.5061	13.297	13.0449	13.0652	13.3167	11.578	13.851	13.7923	13.685	13.9305	M0ZXY5	Serine/threonine protein kinase
9.56497	10.0622	14.5164	14.4626	13.4826	9.70132	11.5905	10.0907	14.3213	14.8173	14.6037	10.2027	9.15415	14.7418	14.5923	10.1366	M0ZXZ8	C3H1-type domain-containing protein
13.4323	10.3881	10.9192	10.2099	13.0566	10.0595	14.1222	13.9892	13.8067	14.4756	14.232	14.8564	14.3801	14.2769	11.5307	10.7861	M0ZXZ8	C3H1-type domain-containing protein
13.1464	13.2913	13.517	13.1876	12.4889	13.05	13.4996	13.2621	13.4449	13.8182	13.6731	13.9758	13.9215	13.8554	13.7867	14.0706	M0ZXZ8	C3H1-type domain-containing protein
12.6685	12.9337	13.7828	12.3965	13.3429	12.8179	13.2377	13.2297	13.2765	12.7622	12.972	10.1461	13.5761	11.1539	10.6588	13.1287	M0ZY50	Nucleolar protein,Nop52 containing protein
20.1981	20.6808	20.8241	20.5774	19.9792	20.9161	21.0949	21.0282	19.9208	20.4366	20.2428	20.4635	20.3993	20.718	20.1775	20.5003	M0ZY56	Plasma membrane ATPase
19.38	19.7093	19.8869	19.5259	19.239	19.9083	20.4742	20.1915	19.2284	19.6282	19.4846	20.0856	20.1958	20.2355	19.8436	20.2842	M0ZY56	Plasma membrane ATPase
14.2446	14.4604	14.689	14.6961	14.1757	14.7518	14.7736	14.7036	13.9107	14.2482	14.2833	14.276	14.9158	14.942	14.8494	14.9433	M0ZY56	Plasma membrane ATPase
14.3203	14.5091	14.5058	14.4511	13.934	14.3794	14.8198	14.6932	13.9758	14.3304	14.209	14.465	14.815	14.8442	14.6484	14.8871	M0ZY56	Plasma membrane ATPase
11.8005	12.2972	12.4901	11.5881	11.6106	12.5946	13.0262	12.4027	12.2726	10.9528	11.6261	12.4165	12.3261	12.5681	12.4567	12.5801	M0ZY56	Plasma membrane ATPase
10.5586	12.4122	10.9028	8.85586	10.7035	9.52648	12.986	12.5731	10.4318	9.23783	13.376	12.661	13.6081	12.4867	12.7677	12.1364	M0ZY56	Plasma membrane ATPase
14.2558	14.3991	14.6745	14.4348	13.7244	14.4284	14.6777	14.5965	14.8808	15.2221	15.1298	15.3261	15.4648	15.4874	15.391	15.4675	M0ZY66	Potassium transporter
9.36368	9.52939	13.545	8.88765	9.17528	10.281	9.74553	12.4882	14.5757	14.6853	14.3275	14.7947	14.5253	16.2163	12.9826	13.6849	M0ZYR2	Serine/arginine-rich protein
11.0145	11.237	13.545	10.7643	10.2013	10.4727	11.209	12.4882	14.5757	14.6853	14.3275	14.7947	14.5253	16.2163	12.9826	13.6849	M0ZYR4	Serine/arginine-rich protein
14.7309	14.8222	14.9319	14.7842	13.9623	14.8395	14.545	14.9773	15.3602	15.3577	15.079	15.0205	14.8976	15.4232	15.3538	15.5017	M0ZYR2	Serine/arginine-rich protein
14.7309	14.8222	14.9319	14.7842	13.9623	14.8395	14.545	14.9773	15.3602	15.3577	15.079	15.0205	14.8976	15.4232	15.3538	15.5017	M0ZYR4	Serine/arginine-rich protein
13.745	13.9898	14.3963	14.199	13.6416	14.2441	14.3079	14.3216	14.6522	14.7424	14.7864	15.1381	14.8991	14.7321	14.6388	14.8301	M0ZYR2	Serine/arginine-rich protein
13.745	13.9898	14.3963	14.199	13.6416	14.2441	14.3079	14.3216	14.6522	14.7424	14.7864	15.1381	14.8991	14.7321	14.6388	14.8301	M0ZYR4	Serine/arginine-rich protein
11.884	11.3975	11.5418	8.89377	10.2315	11.5623	10.4446	11.2953	12.035	9.61263	10.69	10.9431	12.5151	12.3043	12.0982	12.3222	M0ZYR2	Serine/arginine-rich protein
11.884	11.3975	11.5418	9.73522	10.2389	11.5623	11.1632	10.1175	12.035	11.0755	10.5857	9.92823	12.5151	12.3043	12.0982	12.3222	M0ZYR4	Serine/arginine-rich protein
11.2498	11.4812	11.905	11.1189	10.7618	11.3594	12.0724	11.5934	11.2806	11.7214	11.607	12.1986	11.8057	11.4032	11.4091	11.8079	M0ZYV7	Ccaat-binding transcription factor subunit A
9.46865	9.71421	10.5186	10.2501	9.14586	9.48631	13.4212	10.809	11.53	10.0346	13.6816	13.9041	10.2165	13.7487	13.9454	13.9646	M0ZZ04	S-acyltransferase
11.9952	12.3226	12.5845	12.2496	11.1885	11.8215	12.4301	12.3452	12.0364	12.7645	12.378	12.7867	12.8431	12.9138	12.4763	12.5164	M0ZZ04	S-acyltransferase
13.1229	13.502	13.3743	12.9463	13.1815	13.4584	13.6442	13.6309	14.2501	14.126	13.861	14.1865	14.3499	14.1831	14.2131	14.2303	M0ZZ31	Glutamine synthetase
12.5582	12.9263	13.0803	12.5704	9.60708	12.6007	13.1807	13.0323	12.766	13.0073	13.0757	13.4406	12.6228	12.8248	12.2279	12.8659	M0ZZ33	Mitogen-activated protein kinase
12.5582	12.9263	13.0803	12.5704	9.75637	12.6007	13.1807	13.0323	12.766	13.0073	13.0757	13.4406	12.6228	12.8248	12.2279	12.8659	M0ZZ35	Mitogen-activated protein kinase
13.2468	13.3574	13.4226	13.4777	12.6342	13.2864	10.6039	13.2869	13.561	13.7956	13.4593	13.7973	13.5426	13.6494	10.9681	13.6378	M0ZZA3	Protein kinase 1b
11.5335	11.1583	10.2195	8.72125	11.6449	12.2945	11.573	11.8476	10.7139	11.2543	10.5709	10.7034	10.8287	11.0589	10.6433	10.9979	M0ZZA3	Protein kinase 1b
9.78885	10.411	10.4409	9.53672	10.3901	10.2608	10.29	10.6577	9.57404	9.69269	10.0683	9.13644	10.5688	10.6357	10.4295	9.96337	M0ZZH7	Paramyosin
16.6049	16.6936	16.8386	16.7698	16.3866	16.6923	16.8457	16.801	16.6223	16.9992	16.7308	16.9844	16.7138	16.7219	16.5323	16.5845	M0ZZV4	RPM1 interacting protein 4 transcript 2
16.6049	16.6936	16.8386	16.7698	16.3866	16.6923	16.8457	16.801	16.6223	16.9992	16.7308	16.9844	16.7138	16.7219	16.5323	16.5845	M0ZZV5	RPM1 interacting protein 4 transcript 2
15.3703	15.5438	15.6004	15.4791	14.9606	15.3741	15.6298	15.6739	15.3759	15.7411	15.4758	15.764	15.3826	15.5066	15.1397	15.4199	M0ZZV4	RPM1 interacting protein 4 transcript 2
15.3703	15.5438	15.6004	15.4791	14.9606	15.3741	15.6298	15.6739	15.3759	15.7411	15.4758	15.764	15.3826	15.5066	15.1397	15.4199	M0ZZV5	RPM1 interacting protein 4 transcript 2
14.5404	14.7558	13.6537	13.7115	13.3609	13.5216	13.4846	14.6265	14.8584	11.2187	14.969	15.1713	14.8687	10.4019	14.0727	14.9672	M0ZZV4	RPM1 interacting protein 4 transcript 2
14.5404	14.7558	13.6537	13.7115	13.3609	13.5216	13.4846	14.6265	14.8584	10.6544	14.969	15.1713	14.8687	10.4275	14.0727	14.9672	M0ZZV5	RPM1 interacting protein 4 transcript 2
15.182	15.2852	15.342	15.2027	14.9666	15.3887	15.4237	15.4698	15.1034	15.3091	15.3751	15.4306	15.0057	14.9828	15.0123	14.9818	M0ZZV4	RPM1 interacting protein 4 transcript 2
15.182	15.2852	15.342	15.2027	14.9666	15.3887	15.4237	15.4698	15.1034	15.3091	15.3751	15.4306	15.0057	14.9828	15.0123	14.9818	M0ZZV5	RPM1 interacting protein 4 transcript 2
14.6036	14.7011	14.8068	14.8033	14.5025	14.997	14.7452	14.741	14.6811	15.1858	14.7299	14.9037	14.7377	14.9764	14.7985	14.7033	M0ZZV4	RPM1 interacting protein 4 transcript 2
14.6036	14.7011	14.8068	14.8033	14.5025	14.997	14.7452	14.741	14.6811	15.1858	14.7299	14.9037	14.7377	14.9764	14.7985	14.7033	M0ZZV5	RPM1 interacting protein 4 transcript 2
12.9654	12.8642	13.2081	9.95466	12.8209	13.2186	13.1669	13.0791	13.0898	13.3026	13.09	13.401	13.1733	13.1486	12.8115	13.0696	M0ZZV4	RPM1 interacting protein 4 transcript 2
12.9654	12.8642	13.2081	10.2073	12.8209	13.2186	13.1669	13.0791	13.0898	13.3026	13.09	13.401	13.1733	13.1486	12.8115	13.0696	M0ZZV5	RPM1 interacting protein 4 transcript 2
9.23266	9.90141	10.0083	10.681	11.0462	9.701	9.52949	10.1709	9.78784	9.81645	9.81055	9.99041	11.0908	9.29942	9.20529	9.48209	M0ZZV4	RPM1 interacting protein 4 transcript 2
9.23266	9.90141	10.0352	10.5822	8.93496	9.701	9.52949	10.1709	9.78784	9.81645	10.7286	9.99041	10.3859	9.29942	9.20529	9.48209	M0ZZV5	RPM1 interacting protein 4 transcript 2
14.2368	14.4633	14.5718	13.7689	13.7513	14.1458	14.3095	14.5598	13.0839	12.8808	13.0602	13.6465	13.2093	12.9421	13.1673	13.4222	M0ZZV7	Adenosylhomocysteinase
11.8338	12.3726	12.4779	11.6771	12.04	11.2434	12.3641	12.5178	12.9899	13.2087	12.9596	13.1531	12.6423	12.8592	12.711	12.5364	M0ZZY5	Dead box ATP-dependent RNA helicase
15.2386	15.4484	15.532	15.5998	14.9245	15.1735	15.4291	15.4177	15.1465	15.3489	15.2025	15.3646	14.6596	14.7527	14.6731	14.8185	M1A026	Yth domain-containing protein
15.2386	15.4484	15.532	15.5998	14.9245	15.1735	15.4291	15.4177	15.1465	15.3489	15.2025	15.3646	14.6596	14.7527	14.6731	14.8185	M1A027	Yth domain-containing protein
11.2188	9.41949	12.1308	11.0604	10.6192	11.1665	12.3895	11.5493	12.2426	12.3379	12.0501	12.9162	12.6286	12.9771	12.2564	12.6599	M1A0A0	Chromatin remodeling complex subunit
11.9833	12.2577	12.4258	9.54316	10.9977	12.1796	12.2529	12.3245	12.4957	13.066	12.8574	13.1929	12.9774	13.1068	12.7912	13.1641	M1A0A1	Polyprotein
14.9874	10.0702	15.345	14.0807	9.96173	10.1159	15.267	8.98016	14.4611	14.6641	14.4419	14.4665	14.2187	15.4349	14.1539	14.3338	M1A0A3	Alanine--glyoxylate aminotransferase
9.7997	14.1753	9.96193	14.2746	13.5929	9.27678	11.5425	14.3118	13.9792	14.3823	10.0745	14.5604	10.2788	10.1983	14.1685	14.2973	M1A0A3	Alanine--glyoxylate aminotransferase
14.9791	15.3923	13.037	15.4483	14.5401	15.2583	12.4596	15.1119	14.6098	15.0062	14.6286	14.6643	14.7003	14.9026	14.7298	14.6959	M1A0B0	GAL83 protein
13.0407	13.9099	13.8121	11.2451	13.3241	13.2711	14.1398	14.2053	12.6798	13.5539	12.2299	13.1588	12.8	13.2207	13.4346	13.9455	M1A0B0	GAL83 protein
13.0407	13.9099	13.8121	11.2451	13.3241	13.2711	14.1398	14.2053	12.6798	13.5539	12.2299	13.1588	12.8	13.2207	13.4346	13.9455	M1A0B0	GAL83 protein
10.7323	10.0554	16.4895	8.96305	9.72635	11.2742	16.9832	9.36068	9.55316	16.1264	16.046	10.6959	16.3202	16.3444	9.67895	16.311	M1A0K7	ATP binding / binding / protein kinase/ protein serine/threonine kinase/ protein tyrosine kinase
11.4286	10.7006	16.4895	10.5966	10.9317	8.7084	16.9832	10.4085	10.0037	16.1264	16.046	10.2582	16.3202	16.3444	10.5438	16.311	M1A0L1	ATP binding / binding / protein kinase/ protein serine/threonine kinase/ protein tyrosine kinase
10.7749	10.2186	16.4895	9.35306	10.3341	11.0346	16.9832	10.153	10.2296	16.1264	16.046	9.84622	16.3202	16.3444	10.6153	16.311	M1AK55	ATP binding / binding / protein kinase/ protein serine/threonine kinase/ protein tyrosine kinase
12.7345	13.1711	13.2486	9.7731	12.8938	13.1462	14.804	13.7665	13.466	13.6125	13.8876	14.4066	14.0867	14.0564	13.6797	14.2359	M1A0S3	Nucleic acid binding protein
12.7345	13.1711	13.2486	10.6766	12.8938	13.1462	14.804	13.7665	13.466	13.6125	13.8876	14.4066	14.0867	14.0564	13.6797	14.2359	M1A0S4	Nucleic acid binding protein
12.7345	13.1711	13.2486	9.9239	12.8938	13.1462	14.804	13.7665	13.466	13.6125	13.8876	14.4066	14.0867	14.0564	13.6797	14.2359	M1A0S7	Nucleic acid binding protein
12.7345	13.1711	13.2486	9.65602	12.8938	13.1462	14.804	13.7665	13.466	13.6125	13.8876	14.4066	14.0867	14.0564	13.6797	14.2359	M1A0S8	Nucleic acid binding protein
9.53868	10.3109	11.3384	11.4818	11.6435	10.3481	11.9261	11.3795	11.9197	11.8378	12.0732	11.6793	11.7347	11.7112	11.8785	11.4818	M1A0S3	Nucleic acid binding protein
10.0827	10.0507	10.852	11.4818	11.6435	9.38778	11.9261	11.3795	11.9197	11.8378	12.0732	11.6793	11.7347	11.7112	11.8785	11.4818	M1A0S4	Nucleic acid binding protein
10.0512	10.351	10.7116	11.4818	11.6435	10.0133	11.9261	11.3795	11.9197	11.8378	12.0732	11.6793	11.7347	11.7112	11.8785	11.4818	M1A0S7	Nucleic acid binding protein
10.8403	9.3825	9.98394	11.4818	11.6435	9.93007	11.9261	11.3795	11.9197	11.8378	12.0732	11.6793	11.7347	11.7112	11.8785	11.4818	M1A0S8	Nucleic acid binding protein
9.33289	9.25027	11.4389	11.707	8.56749	8.50524	9.99645	7.8398	10.1241	11.6621	9.76227	9.7356	9.44799	9.47395	9.94353	8.02238	M1A0S3	Nucleic acid binding protein
9.33289	9.25027	9.26504	9.57386	8.56749	8.50524	10.3654	7.8398	10.4444	10.2711	9.76227	10.8099	9.44799	9.47395	10.5168	8.02238	M1A0S3	Nucleic acid binding protein
9.33289	9.25027	10.6219	9.84471	8.56749	8.50524	11.2373	7.8398	10.1342	11.0806	9.76227	11.0548	9.44799	9.47395	9.94353	8.02238	M1A0S4	Nucleic acid binding protein
9.33289	9.25027	10.248	9.30836	8.56749	8.50524	11.0464	7.8398	10.2069	9.36499	9.76227	11.4482	9.44799	9.47395	10.5403	8.02238	M1A0S4	Nucleic acid binding protein
9.33289	9.25027	10.4884	9.73629	8.56749	8.50524	11.5345	7.8398	9.17306	9.78524	9.76227	10.0804	9.44799	9.47395	9.94353	8.02238	M1A0S7	Nucleic acid binding protein
9.33289	9.25027	10.4613	9.06797	8.56749	8.50524	10.248	7.8398	10.0232	9.7303	9.76227	10.7573	9.44799	9.47395	10.2467	8.02238	M1A0S7	Nucleic acid binding protein
9.33289	9.25027	10.5687	10.7969	8.56749	8.50524	10.2419	7.8398	11.1445	11.8876	9.76227	10.6969	9.44799	9.47395	9.94353	8.02238	M1A0S8	Nucleic acid binding protein
9.33289	9.25027	9.33136	8.58766	8.56749	8.50524	11.4767	7.8398	10.1388	10.4855	9.76227	10.9242	9.44799	9.47395	9.91138	8.02238	M1A0S8	Nucleic acid binding protein
13.442	13.4515	13.4081	12.4508	13.0561	13.2888	13.5065	13.9878	16.0897	16.1331	16.027	16.2443	16.2567	16.1802	16.2092	16.4492	M1A0V9	Hsp70-interacting protein 1
15.8159	16.6545	16.648	16.019	16.0997	15.8999	16.5869	16.6953	18.5326	18.3931	18.5368	18.769	18.7034	18.6493	18.7053	18.9981	M1A0W0	Hsp70-interacting protein 1
14.1147	14.2905	14.3865	14.3584	13.0014	14.1466	14.5369	14.3266	14.322	14.6577	14.5669	14.6641	14.651	14.7137	14.5243	14.6397	M1A0W3	Heat shock protein 70 (HSP70)-interacting protein
9.55893	14.9729	14.9705	14.9122	14.3208	14.5517	14.5824	14.7387	10.2461	10.9597	10.1831	10.1039	10.7843	9.81339	11.4027	10.3889	M1A0Y3	L-lactate dehydrogenase
9.14946	14.399	10.3075	14.4324	14.4418	14.6575	14.9455	14.8319	15.048	15.3359	15.1908	15.4234	15.6377	15.5592	15.4811	15.7902	M1A167	Glycylpeptide N-tetradecanoyltransferase
9.79552	13.693	11.6179	13.544	12.9418	13.6745	14.4258	14.2843	13.3046	9.74619	13.7687	14.152	13.9438	13.8261	10.3706	10.884	M1A1K0	Poly(RC)-binding protein
10.8866	10.3793	10.9085	9.18016	9.98558	9.69836	10.7494	10.1195	11.5949	10.8038	11.2026	10.7254	12.4123	11.8551	12.1465	11.8573	M1A1S5	Major intrinsic protein 1
15.8402	16.6474	17.3321	17.1481	17.3684	17.045	17.7345	17.4595	16.7891	16.9121	16.8099	16.3523	16.9657	15.9158	16.4902	17.0469	M1A219	Usp domain-containing protein
15.8402	16.6474	17.3321	17.1481	17.3684	17.045	17.7345	17.4595	16.7891	16.9121	16.8099	16.3523	16.9657	15.9158	16.4902	17.0469	M1A220	Usp domain-containing protein
15.8402	16.6474	17.3321	17.1481	17.3684	17.045	17.7345	17.4595	16.7891	16.9121	16.8099	16.3523	16.9657	15.9158	16.4902	17.0469	M1A221	Usp domain-containing protein
12.1613	12.5199	12.4707	12.2154	12.0823	13.6369	10.7726	12.2703	13.7254	12.4815	12.3352	12.4095	12.0513	14.0821	12.5716	12.7131	M1A2B9	CBS domain-containing protein
12.1613	12.5199	12.4707	12.2154	12.0823	13.6369	10.7969	12.2703	13.7254	12.4815	12.3352	12.4095	12.0513	14.0821	12.5716	12.7131	M1A2C1	CBS domain-containing protein
17.0834	17.3717	17.4733	17.271	16.779	17.5461	17.8437	17.6084	16.0387	16.4105	16.2434	16.4498	16.4123	16.5353	16.1221	16.5072	M1A2E4	GYF domain-containing protein
17.0834	17.3717	17.4733	17.271	16.779	17.5461	17.8437	17.6084	16.0387	16.4105	16.2434	16.4498	16.4123	16.5353	16.1221	16.5072	M1A2E5	GYF domain-containing protein
14.9567	15.2308	15.2647	15.2478	14.6432	14.9987	15.0923	14.9063	14.4848	14.793	14.6146	14.8592	15.1378	15.1779	14.8546	15.1233	M1A2E4	GYF domain-containing protein
14.9567	15.2308	15.2647	15.2478	14.6432	14.9987	15.0923	14.9063	14.4848	14.793	14.6146	14.8592	15.1378	15.1779	14.8546	15.1233	M1A2E5	GYF domain-containing protein
16.0278	16.1008	16.4146	16.215	16.0377	16.4081	16.6861	16.5604	15.2151	15.566	15.3121	15.72	15.616	15.4377	15.4425	15.4714	M1A2E4	GYF domain-containing protein
16.0278	16.1008	16.4146	16.215	16.0377	16.4081	16.6861	16.5604	15.2151	15.566	15.3121	15.72	15.616	15.4377	15.4425	15.4714	M1A2E5	GYF domain-containing protein
9.47366	11.9734	10.51	11.608	11.4659	12.2776	12.651	12.3589	10.2248	12.4492	11.8464	9.8806	12.4041	12.2492	12.5262	12.6393	M1A2E4	GYF domain-containing protein
10.8162	11.9734	10.2898	11.608	11.4659	12.2776	12.651	12.3589	10.2273	12.4492	11.8464	10.0689	12.4041	12.2492	12.5262	12.6393	M1A2E5	GYF domain-containing protein
12.0295	10.6727	12.1629	11.7368	9.72679	10.6344	11.616	11.2233	12.1742	12.7533	11.927	12.9021	12.6462	11.961	11.9356	12.7005	M1A2F2	Nucleic acid binding protein
12.0295	10.6727	12.1629	11.7368	9.72679	10.6344	11.616	11.2233	12.1742	12.7533	11.927	12.9021	12.6462	11.961	11.9356	12.7005	M1AJS6	Nucleic acid binding protein
12.7206	12.9249	13.0608	12.5908	12.4381	13.0474	13.1919	13.2765	12.5994	12.8371	12.5585	12.9994	12.9975	13.2384	12.8721	13.1393	M1A2G6	Uncharacterized protein
12.7206	12.9249	13.0608	12.5908	12.4381	13.0474	13.1919	13.2765	12.5994	12.8371	12.5585	12.9994	12.9975	13.2384	12.8721	13.1393	M1A2G7	Uncharacterized protein
20.4964	20.7582	20.8632	20.6813	20.092	20.6593	20.6199	20.6419	19.0888	19.4791	19.1339	19.3984	19.3529	19.3547	19.1987	19.4225	M1A2M6	Patellin 1
15.3453	15.6952	16.8194	16.0831	14.9484	16.4429	15.8297	15.824	16.196	15.8533	16.5477	15.7924	16.2696	16.9895	16.0967	16.406	M1A2M6	Patellin 1
10.4374	14.7217	15.2293	14.8011	13.5797	14.6181	10.0221	14.7676	9.35722	10.0975	10.0566	15.4314	15.3216	11.1886	15.1417	8.36878	M1A2M6	Patellin 1
11.5966	11.3981	10.5089	11.2957	8.95305	10.6073	10.5382	11.4238	12.3938	9.48679	12.149	12.4183	12.331	12.4555	12.0972	12.1269	M1A2W0	Nodulation receptor kinase
11.5966	10.9026	11.6761	11.2957	10.3348	9.99245	11.4119	10.4695	12.3938	10.3944	12.149	12.4183	12.331	12.4555	10.0468	12.1269	M1A2W1	Nodulation receptor kinase
13.0762	13.4687	13.2467	12.988	12.7868	13.1157	13.3721	13.5138	12.7997	13.2549	13.0761	13.4361	12.7398	12.7567	12.6767	12.9708	M1A2W6	Uncharacterized protein
9.08413	16.6112	16.5917	16.6452	16.3402	16.8147	16.7139	16.9158	16.2719	16.6318	16.4387	16.5429	16.6127	16.654	16.6427	16.7679	M1A2Z0	Uncharacterized protein
10.5808	10.6614	11.3173	10.6004	10.8547	10.7971	11.3163	11.2681	10.2559	9.67035	9.56691	10.87	10.4988	10.3266	9.99322	10.229	M1A3D6	Transcription factor
10.5808	10.6614	11.3173	10.6004	10.8547	10.7971	11.3163	11.2681	10.2559	9.67035	9.56691	10.87	10.4988	10.3266	9.99322	10.229	M1A3D7	Transcription factor
10.1759	11.0962	10.8858	9.21588	10.4335	10.9113	12.0929	11.8443	11.1526	11.287	11.3128	11.6721	10.2303	10.6853	9.82636	10.3469	M1A3I7	Progesterone 5 beta-reductase
16.1517	16.4795	16.6004	15.7974	15.6431	16.1549	16.711	16.4727	16.1465	16.4849	16.388	16.789	11.6344	16.5541	16.3822	16.6783	M1A3M1	Eukaryotic translation initiation factor 2 family protein / eIF-2 family protein
16.0083	16.3594	16.4134	15.7262	15.9844	16.5798	16.994	16.8662	16.6396	16.9411	16.8294	17.1265	17.0685	17.1786	16.8927	17.1281	M1A3M1	Eukaryotic translation initiation factor 2 family protein / eIF-2 family protein
11.2727	10.1094	12.0467	11.7916	10.4393	10.2536	10.4519	10.0432	12.6977	12.9406	11.0872	12.9208	10.6467	10.8568	13.0234	10.7376	M1A3M1	Eukaryotic translation initiation factor 2 family protein / eIF-2 family protein
10.4988	11.9625	9.70161	9.49876	12.08	9.31147	12.2284	12.3802	11.3006	11.038	10.427	10.0926	10.7671	9.66185	10.7138	12.7278	M1A3M1	Eukaryotic translation initiation factor 2 family protein / eIF-2 family protein
15.1578	15.4186	15.6799	15.4237	14.9079	15.6833	15.7882	15.7195	15.1417	15.3853	15.4378	15.6346	15.6439	15.535	15.5695	15.6851	M1A401	Uncharacterized protein
11.1435	13.2213	13.4102	13.3973	9.82031	13.1068	13.4774	13.3904	10.3974	13.8387	13.6303	13.8637	10.2992	9.78076	13.318	13.6	M1A415	UDENN domain-containing protein
9.31932	13.2213	13.4102	13.3973	9.40409	13.1068	13.4774	13.3904	10.6669	13.8387	13.6303	13.8637	10.9795	10.648	13.318	13.6	M1A417	UDENN domain-containing protein
9.21565	13.2213	13.4102	13.3973	9.82278	13.1068	13.4774	13.3904	10.3366	13.8387	13.6303	13.8637	10.4039	11.2195	13.318	13.6	M1A418	UDENN domain-containing protein
14.9937	15.1458	15.2685	15.225	14.9868	15.3346	15.3627	15.2978	15.0984	15.4412	15.2173	15.4722	15.2313	15.266	15.0869	15.2094	M1A483	T-complex protein 1 subunit delta
14.2105	14.5874	14.7167	10.0869	14.0756	14.5447	14.7772	14.7329	13.8604	13.9867	14.0676	14.3461	14.0827	13.8164	13.739	11.3048	M1A4F7	Boron transporter
14.2105	14.5874	14.7167	10.2404	14.0756	14.5447	14.7772	14.7329	13.8604	13.9867	14.0676	14.3461	14.0827	13.8164	13.739	11.722	M1A4F8	Boron transporter
13.0927	13.0175	13.5634	12.6472	12.7983	13.5968	13.4387	13.1535	13.4391	13.5605	13.3056	13.4225	13.4049	13.2235	13.0082	12.9695	M1A4Q8	MRP-S28 domain-containing protein
14.9159	14.9421	15.1962	15.1674	14.7746	15.454	15.3373	15.318	15.1878	15.6524	15.2807	15.6335	16.0169	16.0612	15.841	16.0552	M1A4R1	DNA-binding protein
16.0122	15.513	10.1538	15.3965	10.5754	10.0779	15.7345	10.6748	9.97911	9.81656	15.6387	10.746	10.7769	10.9364	8.93901	10.9436	M1A4S9	Golgin candidate 2
16.0122	15.513	11.5762	15.3965	8.92085	8.94654	15.7345	10.093	9.7894	10.0488	15.6387	9.91606	11.2109	9.74843	9.49543	9.36851	M1A4T1	Golgin candidate 2
10.4603	13.0517	9.79805	10.1152	10.4836	12.3646	10.4533	10.3117	13.2856	10.9381	13.1245	13.9768	13.0392	10.3395	10.7619	12.8445	M1A502	Nodulin-26
9.95141	13.0517	10.2769	11.3509	10.5968	12.3646	8.91737	9.57823	13.2856	10.4781	13.1245	13.9768	13.0392	10.953	10.1052	12.8445	M1AHX5	Nodulin-26
16.0107	16.315	16.7382	16.3519	16.2414	16.4714	16.7239	16.5836	16.5408	16.8395	16.3969	16.7092	16.6093	16.5395	16.4777	16.5893	M1A5G2	Serine/threonine-protein phosphatase
16.0107	16.315	16.7382	16.3519	16.2414	16.4714	16.7239	16.5836	16.5408	16.8395	16.3969	16.7092	16.6093	16.5395	16.4777	16.5893	M1A5G3	Serine/threonine-protein phosphatase
15.8829	16.2636	16.3006	16.0372	15.4926	16.1272	16.4182	16.3068	15.7567	16.0736	16.0864	16.4453	16.4483	16.3645	16.1244	16.6914	M1A5G2	Serine/threonine-protein phosphatase
15.8829	16.2636	16.3006	16.0372	15.4926	16.1272	16.4182	16.3068	15.7567	16.0736	16.0864	16.4453	16.4483	16.3645	16.1244	16.6914	M1A5G3	Serine/threonine-protein phosphatase
14.0563	14.1977	14.1128	14.2778	14.0347	14.1977	14.2777	13.362	14.1401	14.322	14.1425	14.3903	14.6788	14.673	14.5718	14.7801	M1A5G2	Serine/threonine-protein phosphatase
14.0563	14.1977	14.1128	14.2778	14.0347	14.1977	14.2777	13.362	14.1401	14.322	14.1425	14.3903	14.6788	14.673	14.5718	14.7801	M1A5G3	Serine/threonine-protein phosphatase
10.1528	13.8491	14.0034	13.8093	13.2071	14.0217	14.3866	14.1291	14.0335	14.1577	14.1066	14.3805	15.0107	15.0111	14.8236	15.0161	M1A5G2	Serine/threonine-protein phosphatase
10.4096	13.8491	14.0034	13.8093	13.2071	14.0217	14.3866	14.1291	14.0335	14.1577	14.1066	14.3805	15.0107	15.0111	14.8236	15.0161	M1A5G3	Serine/threonine-protein phosphatase
15.1268	15.4408	15.5577	15.4518	14.8513	15.4117	15.5808	15.4188	14.6014	14.8116	14.8189	14.912	15.0903	15.1076	14.8641	15.1521	M1A5K9	Uncharacterized protein
15.1268	15.4408	15.5577	15.4518	14.8513	15.4117	15.5808	15.4188	14.6014	14.8116	14.8189	14.912	15.0903	15.1076	14.8641	15.1521	M1A5L0	Uncharacterized protein
15.1268	15.4408	15.5577	15.4518	14.8513	15.4117	15.5808	15.4188	14.6014	14.8116	14.8189	14.912	15.0903	15.1076	14.8641	15.1521	M1A5L1	Uncharacterized protein
12.5741	10.3902	12.9427	10.9968	12.0597	13.2137	12.6881	13.4278	13.5022	14.2675	14.2166	14.5508	14.5966	14.6074	14.3806	14.8718	M1A5L2	BEL5 protein
16.0524	16.1125	16.4298	16.3786	16.1602	16.5283	16.637	16.6415	16.4685	16.765	16.5842	16.8579	16.759	16.8689	16.5938	16.7294	M1A5P0	Cdc2MsC
15.9271	16.2171	16.197	15.7893	15.7341	16.1909	16.5272	16.4963	16.5271	16.6975	16.4542	17.217	17.1049	17.0321	16.7101	17.1112	M1A693	Serine-threonine protein kinase, plant-type;Serine-threonine protein kinase, plant-type
15.9271	16.2171	16.197	15.7893	15.7341	16.1909	16.5272	16.4963	16.5271	16.6975	16.4542	17.217	17.1049	17.0321	16.7101	17.1112	M1A694	Serine-threonine protein kinase, plant-type;Serine-threonine protein kinase, plant-type
15.6302	16.0566	16.2113	15.968	12.9434	16.2204	13.7634	16.4344	11.8737	10.8734	14.664	12.0727	15.3864	10.2782	15.3213	15.1952	M1A6C0	MAR-binding protein
14.6146	14.9299	15.2267	14.6749	14.358	14.6239	15.43	15.2561	14.8155	14.5649	14.9153	15.4411	15.5294	15.2109	14.9857	15.6555	M1A6C9	PRA1 family protein
14.1364	14.3944	14.4377	14.4145	14.2967	14.4402	14.5422	14.406	14.487	14.6188	14.4917	14.7533	15.4907	15.5807	15.3711	15.7136	M1A6E2	Membrin
12.0179	12.5948	12.7563	12.693	11.6554	12.1626	12.4779	10.8806	12.4297	12.5519	12.3504	12.5033	12.6729	12.6122	12.5532	12.6034	M1A6F0	DGCR
14.0174	13.7853	14.3474	13.9738	13.0344	13.2485	14.1189	14.1307	13.6806	14.4283	13.3952	14.1087	13.812	14.0279	13.6988	13.8825	M1A6H3	Chlorophyll a-b binding protein, chloroplastic
15.1024	15.0561	15.0343	14.9797	15.7775	15.1506	14.615	14.7346	15.5303	15.0513	14.8706	15.1485	15.4207	14.9674	15.0813	15.1147	M1A6H3	Chlorophyll a-b binding protein, chloroplastic
10.0527	14.1124	14.2121	13.9258	9.85591	13.4879	11.4742	13.653	13.7032	10.7514	13.8759	10.9517	14.9803	15.5595	15.0668	11.3834	M1A6H3	Chlorophyll a-b binding protein, chloroplastic
12.5975	10.4508	9.72547	12.8513	13.0449	9.21313	13.3568	13.2134	13.9564	14.2192	14.0251	13.8606	13.9146	14.2995	13.5646	13.9054	M1A6H4	Nucleoporin
9.44587	13.9137	14.1839	13.9072	9.98394	13.5965	13.9484	11.7261	14.0967	9.49059	14.5832	11.6702	9.38953	11.8097	14.4589	10.6813	M1A6K1	26S proteasome non-ATPase regulatory subunit 3
9.96148	13.9137	14.1839	13.9072	9.77873	13.5965	13.9484	10.2117	14.0967	9.65741	14.5832	9.97169	10.4637	10.7615	14.4589	9.337	M1A6K3	26S proteasome non-ATPase regulatory subunit 3
13.482	14.0245	14.1532	14.0143	13.7533	14.472	14.7824	14.7692	13.3079	13.6697	13.6046	13.8524	13.8564	13.9082	13.6677	13.9436	M1A6K4	Ubiquitin-conjugating enzyme E2 23
13.482	14.0245	14.1532	14.0143	13.7533	14.472	14.7824	14.7692	13.3079	13.6697	13.6046	13.8524	13.8564	13.9082	13.6677	13.9436	M1A6K6	Ubiquitin-conjugating enzyme E2 23
12.1027	12.1817	12.4677	12.5534	12.3669	12.6895	12.8531	12.709	12.0541	12.2712	12.32	12.1025	12.4809	12.5257	12.5637	12.6546	M1A714	Multidrug resistance-associated protein 2, 6 (Mrp2, 6), abc-transoprter;Multidrug resistance-associated protein 2, 6 (Mrp2, 6), abc-transoprter
12.1027	12.1817	12.4677	12.5534	12.3669	12.6895	12.8531	12.709	12.0541	12.2712	12.32	12.1025	12.4809	12.5257	12.5637	12.6546	M1A715	Multidrug resistance-associated protein 2, 6 (Mrp2, 6), abc-transoprter;Multidrug resistance-associated protein 2, 6 (Mrp2, 6), abc-transoprter
15.2116	15.5068	15.5694	15.6398	14.8159	15.3471	15.5722	15.476	15.8286	16.1406	16.0341	16.4561	16.271	16.2664	16.0251	16.3255	M1A744	Serine/arginine rich splicing factor
15.2116	15.5068	15.5694	15.6398	14.8159	15.3471	15.5722	15.476	15.8286	16.1406	16.0341	16.4561	16.271	16.2664	16.0251	16.3255	M1A747	Serine/arginine rich splicing factor
15.2116	15.5068	15.5694	15.6398	14.8159	15.3471	15.5722	15.476	15.8286	16.1406	16.0341	16.4561	16.271	16.2664	16.0251	16.3255	M1A748	Serine/arginine rich splicing factor
15.2116	15.5068	15.5694	15.6398	14.8159	15.3471	15.5722	15.476	15.8286	16.1406	16.0341	16.4561	16.271	16.2664	16.0251	16.3255	M1A749	Serine/arginine rich splicing factor
13.004	13.3426	13.7864	13.0469	12.5625	13.0811	13.9981	13.7778	13.2571	13.6475	13.6866	14.1411	13.9469	13.9956	13.7989	14.2237	M1A751	Translocase of chloroplast 159, chloroplastic
12.8472	12.9399	13.0829	10.8402	12.9218	13.5674	13.4796	13.7157	13.287	13.2262	13.4282	11.8887	12.5645	14.3195	14.2601	14.3177	M1A772	DNA binding protein
12.8472	12.9399	13.0829	10.8402	12.9218	13.5674	13.4796	13.7157	13.287	13.2262	13.4282	11.8887	12.5645	14.3195	14.2601	14.3177	M1A773	DNA binding protein
11.8618	12.1723	12.1408	10.9721	11.9465	11.6743	12.1667	12.036	12.7445	12.7046	12.6858	12.9787	12.8247	12.7904	12.5597	12.9308	M1A772	DNA binding protein
11.8618	12.1723	12.1408	10.9721	11.9465	11.6743	12.1667	12.036	12.7445	12.7046	12.6858	12.9787	12.8247	12.7904	12.5597	12.9308	M1A773	DNA binding protein
13.7515	13.9927	14.1288	13.336	13.4321	14.0917	14.2029	13.8368	13.9696	14.1193	14.2004	14.5235	14.5714	14.4627	14.3738	14.8169	M1A791	Extensin
11.7616	10.3743	11.9264	10.0027	10.5526	10.5246	9.25738	9.82984	9.38088	12.127	10.7633	10.7655	12.2783	12.2072	11.4397	12.3319	M1A7M4	14-3-3 protein
10.1977	10.4219	10.6404	9.28364	9.64742	10.0852	11.0878	10.7635	10.2901	10.2691	10.8286	11.0584	11.0946	10.6943	10.766	11.5615	M1A7M4	14-3-3 protein
11.3412	10.7871	11.6777	12.3592	10.0088	12.7959	9.97962	10.4195	9.25468	10.0682	10.9463	12.4971	10.7341	12.3214	12.3531	11.7805	M1A7M5	5'-adenylylsulfate reductase-like 4
11.3974	10.4265	10.6292	12.3592	9.71875	12.7959	10.2213	8.79228	11.0955	10.8224	11.324	12.4971	10.339	12.3214	12.3531	11.7805	M1A7M6	5'-adenylylsulfate reductase-like 4
13.7935	14.2479	10.0251	14.3785	9.68675	14.4185	14.0877	10.815	14.1346	11.1905	13.8605	14.4628	14.3673	14.2723	14.3265	9.71927	M1A852	ATP binding protein
13.7935	14.2479	10.2319	14.3785	9.29744	14.4185	14.0877	10.1551	14.1346	10.3257	13.8605	14.4628	14.3673	14.2723	14.3265	10.3004	M1A853	ATP binding protein
12.92	10.9396	8.90288	13.2316	9.48048	9.98814	13.2292	13.1853	13.059	10.7972	10.5214	13.5123	13.6201	13.6457	9.67692	13.6933	M1A852	ATP binding protein
12.92	10.3222	10.3638	13.2316	10.8781	10.8358	13.2292	13.1853	13.059	12.2273	9.81796	13.5123	13.6201	13.6457	10.7145	13.6933	M1A853	ATP binding protein
13.8828	14.2366	14.2402	14.2825	10.5726	10.7161	14.2386	14.2353	14.2479	14.7781	14.4287	14.9304	11.036	14.4047	14.359	14.6366	M1A858	DNA binding protein
13.8828	14.2366	14.2402	14.2825	9.88286	9.28005	14.2386	14.2353	14.2479	14.7781	14.4287	14.9304	10.0901	14.4047	14.359	14.6366	M1A859	DNA binding protein
18.2974	18.5611	18.5911	18.2925	17.5798	18.1213	18.4178	18.3045	18.2315	18.644	18.448	18.7011	17.8983	17.9109	17.6581	17.8689	M1A8C0	Serine/threonine protein kinase
18.2974	18.5611	18.5911	18.2925	17.5798	18.1213	18.4178	18.3045	18.2315	18.644	18.448	18.7011	17.8983	17.9109	17.6581	17.8689	M1A8C3	Serine/threonine protein kinase
18.2974	18.5611	18.5911	18.2925	17.5798	18.1213	18.4178	18.3045	18.2315	18.644	18.448	18.7011	17.8983	17.9109	17.6581	17.8689	M1A8C4	Serine/threonine protein kinase
14.4963	14.8562	15.0702	11.2022	12.422	10.6055	11.0684	13.0096	15.6711	14.7664	14.9729	15.8729	15.7407	15.8707	15.9331	16.1623	M1A8C0	Serine/threonine protein kinase
14.4963	14.8562	15.0702	11.2022	12.422	11.79	11.0684	13.0096	15.6711	14.7664	14.9729	15.8729	15.7407	15.8707	15.9331	16.1623	M1A8C0	Serine/threonine protein kinase
14.4963	14.8562	15.0702	11.2022	12.422	10.3055	11.0684	13.0096	15.6711	14.7664	14.9729	15.8729	15.7407	15.8707	15.9331	16.1623	M1A8C3	Serine/threonine protein kinase
14.4963	14.8562	15.0702	11.2022	12.422	9.54069	11.0684	13.0096	15.6711	14.7664	14.9729	15.8729	15.7407	15.8707	15.9331	16.1623	M1A8C3	Serine/threonine protein kinase
14.4963	14.8562	15.0702	11.2022	12.422	11.5793	11.0684	13.0096	15.6711	14.7664	14.9729	15.8729	15.7407	15.8707	15.9331	16.1623	M1A8C4	Serine/threonine protein kinase
14.4963	14.8562	15.0702	11.2022	12.422	9.60484	11.0684	13.0096	15.6711	14.7664	14.9729	15.8729	15.7407	15.8707	15.9331	16.1623	M1A8C4	Serine/threonine protein kinase
16.0374	16.3038	16.4502	16.3824	15.9824	16.4568	16.5184	16.4181	15.9966	16.4438	16.202	16.3687	16.3908	16.2878	16.1671	16.3843	M1A8N2	ABI3-interacting protein 3
13.6082	13.8017	13.7702	13.8594	12.9201	13.9915	13.5678	13.8806	13.1951	13.8014	13.729	13.9083	10.6297	9.55726	10.2622	12.0861	M1A914	Cellulose synthase
13.6082	13.8017	13.7702	13.8594	12.9201	13.9915	13.5678	13.8806	13.1951	13.8014	13.729	13.9083	11.0705	9.86036	10.7032	12.0861	M1A916	Cellulose synthase
13.7042	13.9246	14.0969	14.0818	14.1283	14.0629	14.6102	14.6256	14.5188	14.8748	14.5915	14.8369	14.809	14.9857	14.6138	14.8168	M1A9A3	Protein OBERON 4
13.7042	13.9246	14.0969	14.0818	14.1283	14.0629	14.6102	14.6256	14.5188	14.8748	14.5915	14.8369	14.809	14.9857	14.6138	14.8168	M1A9A4	Protein OBERON 4
9.49885	10.8637	12.2226	10.7998	9.69394	10.1497	10.3429	9.80006	10.4506	10.3859	10.3396	10.516	10.6424	10.5727	10.2496	10.4772	M1A9A3	Protein OBERON 4
9.49885	10.0129	9.8042	11.0657	9.69394	10.6036	10.3429	9.80006	10.4506	10.3859	10.3396	10.516	10.6424	10.5727	10.2496	10.4772	M1A9A4	Protein OBERON 4
12.5544	12.2248	12.6682	9.73595	12.2539	12.3987	10.0579	12.6064	12.2968	12.8147	13.1358	12.8362	11.2513	10.5131	12.6577	12.8624	M1A9H6	Stpk1 protein kinase;Stpk1 protein kinase;Serine/threonine protein kinase;Serine/threonine protein kinase;Stpk1 protein kinase;Serine/threonine protein kinase;Serine/threonine protein kinase;Serine/threonine protein kinase;AvrPto-dependent Pto-interacting protein 3;AvrPto-dependent Pto-interacting protein 3;Stpk1 protein kinase
12.5544	12.2248	12.6682	10.5017	12.2539	12.3987	10.6803	12.6064	12.2968	12.8147	13.1358	12.8362	12.543	10.1343	12.6577	12.8624	M1A9H7	Stpk1 protein kinase;Stpk1 protein kinase;Serine/threonine protein kinase;Serine/threonine protein kinase;Stpk1 protein kinase;Serine/threonine protein kinase;Serine/threonine protein kinase;Serine/threonine protein kinase;AvrPto-dependent Pto-interacting protein 3;AvrPto-dependent Pto-interacting protein 3;Stpk1 protein kinase
12.5544	12.2248	12.6682	10.538	12.2539	12.3987	9.81225	12.6064	12.2968	12.8147	13.1358	12.8362	10.5227	10.2539	12.6577	12.8624	M1AGN2	Stpk1 protein kinase;Stpk1 protein kinase;Serine/threonine protein kinase;Serine/threonine protein kinase;Stpk1 protein kinase;Serine/threonine protein kinase;Serine/threonine protein kinase;Serine/threonine protein kinase;AvrPto-dependent Pto-interacting protein 3;AvrPto-dependent Pto-interacting protein 3;Stpk1 protein kinase
12.5544	12.2248	12.6682	9.81697	12.2539	12.3987	9.31548	12.6064	12.2968	12.8147	13.1358	12.8362	11.531	9.35987	12.6577	12.8624	M1AGN3	Stpk1 protein kinase;Stpk1 protein kinase;Serine/threonine protein kinase;Serine/threonine protein kinase;Stpk1 protein kinase;Serine/threonine protein kinase;Serine/threonine protein kinase;Serine/threonine protein kinase;AvrPto-dependent Pto-interacting protein 3;AvrPto-dependent Pto-interacting protein 3;Stpk1 protein kinase
12.5544	12.2248	12.6682	11.6861	12.2539	12.3987	11.5734	12.6064	12.2968	12.8147	13.1358	12.8362	10.7817	10.6965	12.6577	12.8624	M1AY39	Stpk1 protein kinase;Stpk1 protein kinase;Serine/threonine protein kinase;Serine/threonine protein kinase;Stpk1 protein kinase;Serine/threonine protein kinase;Serine/threonine protein kinase;Serine/threonine protein kinase;AvrPto-dependent Pto-interacting protein 3;AvrPto-dependent Pto-interacting protein 3;Stpk1 protein kinase
12.5544	12.2248	12.6682	9.20955	12.2539	12.3987	10.8353	12.6064	12.2968	12.8147	13.1358	12.8362	10.4957	11.06	12.6577	12.8624	M1BQX8	Stpk1 protein kinase;Stpk1 protein kinase;Serine/threonine protein kinase;Serine/threonine protein kinase;Stpk1 protein kinase;Serine/threonine protein kinase;Serine/threonine protein kinase;Serine/threonine protein kinase;AvrPto-dependent Pto-interacting protein 3;AvrPto-dependent Pto-interacting protein 3;Stpk1 protein kinase
12.5544	12.2248	12.6682	10.4712	12.2539	12.3987	10.0582	12.6064	12.2968	12.8147	13.1358	12.8362	10.941	10.9116	12.6577	12.8624	M1C087	Stpk1 protein kinase;Stpk1 protein kinase;Serine/threonine protein kinase;Serine/threonine protein kinase;Stpk1 protein kinase;Serine/threonine protein kinase;Serine/threonine protein kinase;Serine/threonine protein kinase;AvrPto-dependent Pto-interacting protein 3;AvrPto-dependent Pto-interacting protein 3;Stpk1 protein kinase
12.5544	12.2248	12.6682	9.35431	12.2539	12.3987	9.61607	12.6064	12.2968	12.8147	13.1358	12.8362	9.99024	10.8548	12.6577	12.8624	M1C089	Stpk1 protein kinase;Stpk1 protein kinase;Serine/threonine protein kinase;Serine/threonine protein kinase;Stpk1 protein kinase;Serine/threonine protein kinase;Serine/threonine protein kinase;Serine/threonine protein kinase;AvrPto-dependent Pto-interacting protein 3;AvrPto-dependent Pto-interacting protein 3;Stpk1 protein kinase
12.5544	12.2248	12.6682	10.5949	12.2539	12.3987	10.3047	12.6064	12.2968	12.8147	13.1358	12.8362	11.7807	9.84038	12.6577	12.8624	M1CGK8	Stpk1 protein kinase;Stpk1 protein kinase;Serine/threonine protein kinase;Serine/threonine protein kinase;Stpk1 protein kinase;Serine/threonine protein kinase;Serine/threonine protein kinase;Serine/threonine protein kinase;AvrPto-dependent Pto-interacting protein 3;AvrPto-dependent Pto-interacting protein 3;Stpk1 protein kinase
12.5544	12.2248	12.6682	11.0727	12.2539	12.3987	11.086	12.6064	12.2968	12.8147	13.1358	12.8362	9.89346	11.7233	12.6577	12.8624	M1CJ50	Stpk1 protein kinase;Stpk1 protein kinase;Serine/threonine protein kinase;Serine/threonine protein kinase;Stpk1 protein kinase;Serine/threonine protein kinase;Serine/threonine protein kinase;Serine/threonine protein kinase;AvrPto-dependent Pto-interacting protein 3;AvrPto-dependent Pto-interacting protein 3;Stpk1 protein kinase
12.5544	12.2248	12.6682	10.3283	12.2539	12.3987	10.3002	12.6064	12.2968	12.8147	13.1358	12.8362	10.5394	10.5185	12.6577	12.8624	Q41493	Stpk1 protein kinase;Stpk1 protein kinase;Serine/threonine protein kinase;Serine/threonine protein kinase;Stpk1 protein kinase;Serine/threonine protein kinase;Serine/threonine protein kinase;Serine/threonine protein kinase;AvrPto-dependent Pto-interacting protein 3;AvrPto-dependent Pto-interacting protein 3;Stpk1 protein kinase
11.705	13.7396	14.3757	11.8477	12.6866	11.8283	14.9837	11.8659	13.1411	12.0792	13.6408	13.5584	13.1753	12.1046	9.84135	12.0514	M1A9T9	Chloride channel protein
13.5189	14.0197	14.2341	14.1441	12.5195	13.2948	13.9454	12.8454	12.7733	12.9785	13.2199	13.2482	13.1363	13.4675	13.0088	13.4465	M1A9T9	Chloride channel protein
12.5041	9.97046	10.9176	10.0824	12.0503	12.7755	14.0409	11.1014	13.474	13.1502	12.8597	12.9504	13.3148	13.5914	12.1149	10.2973	M1A9T9	Chloride channel protein
19.1325	19.4534	19.6062	18.2113	18.337	18.9965	19.2669	19.0699	19.1146	19.5157	19.306	19.6271	19.6642	19.8311	19.5252	19.7579	M1A9U2	Nodulin
19.1325	19.4534	19.6062	18.2113	18.337	18.9965	19.2669	19.0699	19.1146	19.5157	19.306	19.6271	19.6642	19.8311	19.5252	19.7579	M1A9U3	Nodulin
19.1325	19.4534	19.6062	18.2113	18.337	18.9965	19.2669	19.0699	19.1146	19.5157	19.306	19.6271	19.6642	19.8311	19.5252	19.7579	M1A9U4	Nodulin
14.7482	15.0111	14.9367	15.0107	14.3852	14.9349	15.3256	15.0893	14.8978	15.2568	15.0887	15.4785	15.2516	15.3287	14.9421	15.2285	M1A9V7	30S ribosomal protein S15, chloroplastic;30S ribosomal protein S15, chloroplastic
14.7482	15.0111	14.9367	15.0107	14.3852	14.9349	15.3256	15.0893	14.8978	15.2568	15.0887	15.4785	15.2516	15.3287	14.9421	15.2285	Q2V995	30S ribosomal protein S15, chloroplastic;30S ribosomal protein S15, chloroplastic
15.4637	15.7488	15.9235	15.6644	9.91257	16.3887	16.5449	16.5334	15.8362	16.0516	15.8975	16.1018	16.0585	16.2006	16.0736	16.1689	M1AAA2	Integral membrane single C2 domain protein
20.2819	20.8328	20.4968	18.5355	19.9977	20.1974	21.6096	20.9664	19.881	20.0128	20.4357	20.5492	20.3993	20.4723	20.1978	20.6619	M1AAF5	60s acidic ribosomal protein
20.2819	20.8328	20.4968	18.5355	19.9977	20.1974	21.6096	20.9664	19.881	20.0128	20.4357	20.5492	20.3993	20.4723	20.1978	20.6619	M1AAF6	60s acidic ribosomal protein
20.2819	20.8328	20.4968	18.5355	19.9977	20.1974	21.6096	20.9664	19.881	20.0128	20.4357	20.5492	20.3993	20.4723	20.1978	20.6619	M1ABN6	60s acidic ribosomal protein
16.7334	16.9946	17.2046	17.0125	15.8225	16.5175	16.7621	16.8979	16.4579	16.6685	16.0383	16.6618	17.2337	17.3399	17.2301	17.3734	M1AAI2	Tonoplast intrinsic protein
14.6593	15.198	15.323	15.176	14.9703	15.4316	16.8733	16.0361	14.5886	14.993	14.9763	15.4037	15.3775	15.3173	15.0037	15.7269	M1AAS0	Histone-lysine N-methyltransferase, H3 lysine-9 specific SUVH1
13.2468	13.6633	13.8171	13.4471	13.2928	13.8042	14.105	13.927	13.6804	14.0103	13.702	14.0495	13.9976	14.1427	13.9708	14.2208	M1AAV5	Uncharacterized protein
15.4559	16.8241	15.9431	15.8553	15.4515	16.2074	10.2816	16.2315	15.9318	16.1921	15.9589	16.4052	16.4443	16.4116	16.2133	16.456	M1AAV5	Uncharacterized protein
11.0178	10.2208	10.7878	15.6809	15.5741	10.5541	15.9648	16.0605	16.0219	10.4307	10.0501	16.2812	10.2375	16.5084	10.7324	16.522	M1AAV5	Uncharacterized protein
8.98616	9.85448	10.7204	9.77315	9.17316	9.81618	10.6822	9.73486	12.6886	11.2377	12.4396	13.0925	12.8396	13.0037	13.0747	13.4258	M1AAV5	Uncharacterized protein
10.8018	9.85448	10.7204	9.77315	10.7635	9.81618	10.6822	9.73486	12.6886	11.2377	12.4396	13.0925	12.8396	13.0037	13.0747	13.4258	M1AAV5	Uncharacterized protein
15.4625	15.6449	15.6966	15.7618	15.0044	15.4829	15.6348	15.6347	15.3582	15.7268	15.571	15.8329	15.695	15.764	15.6392	15.8327	M1AAV9	ADP-ribosylation factor GTPase-activating protein AGD14
15.4625	15.6449	15.6966	15.7618	15.0044	15.4829	15.6348	15.6347	15.3582	15.7268	15.571	15.8329	15.695	15.764	15.6392	15.8327	M1AAW0	ADP-ribosylation factor GTPase-activating protein AGD14
13.6352	10.5078	13.7262	13.8452	12.8615	13.1145	13.2702	13.1047	10.0498	13.6417	10.6792	13.6374	11.6484	13.6033	11.456	13.6288	M1AAV9	ADP-ribosylation factor GTPase-activating protein AGD14
13.6352	10.5667	13.7262	13.8452	12.8615	13.1145	13.2702	13.1047	10.0235	13.6417	9.14357	13.6374	9.60133	13.6033	11.2819	13.6288	M1AAW0	ADP-ribosylation factor GTPase-activating protein AGD14
13.6407	10.6045	11.2631	13.8696	9.65756	13.6336	14.6612	14.226	13.7234	10.1961	13.0601	14.2522	13.454	10.7972	11.0677	13.3025	M1AB97	H/ACA ribonucleoprotein complex subunit 4
13.6407	11.7002	11.2333	13.8696	9.12052	13.6336	14.6612	14.226	13.7234	10.5704	13.0601	14.2522	13.454	11.5025	10.3742	13.3025	M1AB98	H/ACA ribonucleoprotein complex subunit 4
17.2755	17.4885	17.6413	17.5522	17.3957	17.6665	17.7787	17.7941	17.3582	17.4884	17.3579	17.6966	17.459	17.6421	17.357	17.605	M1ABD9	Translocation protein SEC62
13.8386	14.0304	14.1421	13.8563	13.4311	13.949	13.9885	13.9752	14.3349	14.5484	14.5215	14.8879	14.4025	14.4017	14.1078	14.3847	M1ABF8	Heterogeneous nuclear ribonucleoprotein
16.7955	17.1169	17.0517	17.0219	16.3236	16.64	17.2302	16.8915	16.8703	17.2061	17.0755	17.4716	17.8847	17.722	17.4492	17.8872	M1ABI2	Extensin
15.3225	15.6973	15.5979	15.0555	15.0125	15.3367	15.4628	15.3584	15.63	15.8168	15.6638	15.7874	16.1998	16.0988	16.0011	16.1558	M1ABI2	Extensin
15.3225	15.6973	15.5979	15.0555	15.0125	15.3367	15.4628	15.3584	15.63	15.8168	15.6638	15.7874	16.1998	16.0988	16.0011	16.1558	M1ABI2	Extensin
16.7999	16.8188	16.9618	16.9666	16.2869	16.5927	16.9013	16.7052	16.7113	16.9453	16.7344	17.0714	17.2986	17.2147	17.1183	17.2275	M1ABI2	Extensin
15.6378	15.8907	16.5237	16.4732	15.412	9.62051	15.2853	15.1246	16.6202	17.0064	16.8382	17.071	17.154	17.206	16.9701	16.7019	M1ABI2	Extensin
14.1274	14.3694	14.4542	13.4558	10.8624	14.0699	14.3876	14.2313	13.9851	14.4453	14.8271	14.6934	14.9145	14.7967	14.5262	14.7304	M1ABI2	Extensin
9.65358	14.8397	14.6344	15.0166	10.7469	14.7439	14.1207	14.6583	15.4381	15.5679	14.2538	14.857	15.16	15.8749	15.673	15.8127	M1ABI2	Extensin
13.4506	13.5959	12.9484	12.3103	12.2243	11.8092	12.619	12.5092	14.4083	14.8117	14.5022	14.7085	15.4089	15.016	14.9796	14.7601	M1ABI2	Extensin
13.4506	13.5959	12.9484	12.3103	12.2243	11.8092	12.619	12.5092	14.4083	14.8117	14.5022	14.7085	15.4089	15.016	14.9796	14.7601	M1ABI2	Extensin
10.1586	12.3893	10.7036	11.7985	12.124	10.7424	11.5889	9.81035	12.9638	13.6824	13.5129	13.8648	14.4883	14.4294	13.0356	14.2669	M1ABI2	Extensin
12.9289	12.7275	12.5272	13.2512	12.6469	12.4439	13.0375	12.5273	12.8218	12.9059	12.9976	12.8221	13.5798	13.5323	13.3946	13.6609	M1ABI2	Extensin
14.3509	16.0042	14.4455	14.4607	10.1994	15.5423	15.565	14.1057	16.5912	16.9302	16.06	17.2863	16.7971	16.8483	17.0271	16.7407	M1ABI3	Chlorophyll a-b binding protein, chloroplastic
12.5789	13.0306	13.1294	12.8128	11.916	12.5139	12.9835	12.7727	11.7447	12.1336	12.1191	12.611	12.3199	12.0925	11.6301	12.0781	M1ABK4	Non-specific serine/threonine protein kinase
12.4375	12.4898	13.1897	10.7276	9.67297	11.2915	10.4584	13.0068	13.1854	13.6819	13.6857	14.0859	13.8498	14.0582	13.6724	13.8333	M1ABQ3	Amino acid transporter
12.4375	12.4898	13.1897	8.9724	9.79796	10.2889	9.83143	13.0068	13.1854	13.6819	13.6857	14.0859	13.8498	14.0582	13.6724	13.8333	M1ABQ4	Amino acid transporter
14.2897	14.5854	14.7746	14.4974	13.7485	14.4195	15.2277	14.7793	13.9213	14.3527	14.2684	14.7277	14.7848	14.7034	14.342	15.0138	M1ABR1	Uncharacterized protein
14.2897	14.5854	14.7746	14.4974	13.7485	14.4195	15.2277	14.7793	13.9213	14.3527	14.2684	14.7277	14.7848	14.7034	14.342	15.0138	M1ABR2	Uncharacterized protein
10.8365	10.8545	11.1701	9.92718	9.83474	9.94196	10.8079	9.65436	10.2739	9.48923	10.3552	9.57056	10.2356	9.45094	10.3169	9.53227	M1ABR1	Uncharacterized protein
10.8365	10.8545	11.1701	9.92718	9.83474	9.94196	10.8079	9.65436	10.2739	9.48923	10.3552	9.57056	10.2356	9.45094	10.3169	9.53227	M1ABR2	Uncharacterized protein
13.1639	13.5649	13.4937	13.416	13.1308	13.5648	14.1122	13.7326	12.54	13.1132	13.1852	13.1666	13.3989	13.2381	13.3213	13.5784	M1ACD6	40S ribosomal protein S17
10.12	10.2038	17.1727	10.0321	10.1315	10.7755	11.5152	10.857	9.72587	12.2094	11.3224	9.44161	17.4211	17.4832	10.0905	17.5282	M1ACG8	Sodium/proline symporter
16.4975	9.92934	10.1069	16.9551	17.0733	17.4572	10.7422	17.6538	16.98	11.6231	17.2404	10.6996	11.6038	10.4615	11.1076	10.4551	M1ACG8	Sodium/proline symporter
13.409	13.849	14.3538	13.8176	13.2657	13.8542	14.5691	14.4477	14.3205	14.7621	14.6255	14.9812	14.1051	14.2153	14.0311	14.6229	M1ACL9	Uncharacterized protein
9.9998	13.5846	13.6193	13.4905	12.66	12.979	10.7936	13.5168	17.4482	10.4282	10.7791	11.3836	11.1894	11.2957	12.8052	10.6986	M1ACS9	Uncharacterized protein
11.9807	10.0481	11.2888	9.79074	9.81119	8.89047	11.8423	9.64846	12.7681	13.1185	13.0725	13.4397	13.3583	13.1515	12.6946	13.4847	M1ACS9	Uncharacterized protein
11.2119	10.3831	11.5175	10.1626	8.38774	10.5208	10.3149	10.8986	9.51151	11.7376	10.9341	12.1149	13.3999	13.1036	12.9796	13.4105	M1AD06	Small GTPase Rab2
11.2119	9.70269	10.8746	10.1626	9.96062	10.5208	10.3627	11.3226	11.0586	11.7376	10.9341	12.1149	13.3999	13.1036	12.9796	13.4105	M1BWS2	Small GTPase Rab2
11.2119	11.6849	10.2271	10.1626	9.93194	10.5208	10.2866	10.3908	9.75909	11.7376	10.9341	12.1149	13.3999	13.1036	12.9796	13.4105	M1D2H8	Small GTPase Rab2
13.0935	13.488	13.5284	13.3678	12.8284	13.229	13.7866	13.479	10.1725	11.7343	10.8802	12.0724	10.0959	10.379	10.4673	11.7179	M1AD62	Neutral leucine aminopeptidase preprotein
9.68346	13.3138	13.36	12.7331	12.7589	12.9368	13.9997	13.4287	12.9429	13.5019	13.6163	13.9427	13.7519	13.9671	13.5596	13.9999	M1ADN6	Serine/threonine-protein kinase PBS1
10.9412	10.0752	9.20923	10.1565	10.9795	7.22443	9.24752	8.63728	9.78158	8.80887	7.95523	9.4866	10.8582	11.503	11.2286	11.9061	M1ADX2	ABRE binding factor
10.9412	10.0752	9.20923	10.1565	10.9795	7.22443	9.24752	8.63728	9.78158	8.80887	7.95523	9.4866	10.8582	11.503	11.2286	11.9061	M1ADX3	ABRE binding factor
10.3393	10.6919	10.7506	9.55603	10.3792	12.0202	10.9275	15.0391	14.84	11.196	15.0177	15.1264	15.1016	10.1108	14.9379	9.85987	M1ADX7	Paramyosin
11.9197	10.5813	11.224	12.5944	9.88002	10.0736	13.0685	13.1322	12.3557	12.5678	12.4689	12.7172	12.9095	12.9755	12.9985	13.1273	M1ADX7	Paramyosin
12.6519	13.0879	13.2661	9.37595	12.2939	12.7899	13.6279	13.2968	12.7474	13.098	13.0438	11.5283	13.7335	13.706	13.6312	13.828	M1AE51	Glutaminase
14.4192	14.942	14.8577	14.8086	14.6442	14.9222	15.0679	15.2097	14.2874	14.5637	14.2325	14.4077	14.4638	14.4649	14.4619	14.4849	M1AE74	Lactoylglutathione lyase
20.2528	20.9431	20.5797	19.2604	18.7462	19.4446	19.8627	19.7615	21.1916	21.2356	21.2436	21.8126	18.9375	18.9571	18.9319	19.1148	M1AE81	Major intrinsic protein 2
20.2528	20.9431	20.5797	19.2604	18.7462	19.4446	19.8627	19.7615	21.1916	21.2356	21.2436	21.8126	18.9375	18.9571	18.9319	19.1148	M1AE81	Major intrinsic protein 2
12.1859	12.5055	12.5071	12.2839	12.1323	12.2881	12.3717	12.1654	12.8132	13.0835	12.5835	12.9501	12.9283	12.7742	12.8062	12.8955	M1AE81	Major intrinsic protein 2
12.9305	13.1021	13.2317	13.1545	12.292	12.9804	12.7036	12.8529	13.7922	13.8674	13.6905	13.8776	13.2695	13.4253	13.3333	13.343	M1AE81	Major intrinsic protein 2
9.41293	9.53424	10.9897	9.88046	10.452	9.02177	10.971	10.3094	10.6854	13.5785	13.6395	13.8729	10.4403	14.1722	13.7342	14.2512	M1AEA0	Uncharacterized protein
13.5143	13.8645	14.1027	13.7748	13.252	13.9966	14.3248	14.1199	13.4619	14.0764	13.9582	14.3561	14.202	14.2895	14.0094	14.3891	M1AED1	Sumo ligase
13.5143	13.8645	14.1027	13.7748	13.252	13.9966	14.3248	14.1199	13.4619	14.0764	13.9582	14.3561	14.202	14.2895	14.0094	14.3891	M1AED2	Sumo ligase
13.8273	14.1433	14.3126	14.3252	12.8032	9.91252	14.7687	12.3681	12.7669	14.5113	12.5452	14.612	14.5659	13.3209	13.137	14.0243	M1AEI8	Nucleic acid binding protein
11.2824	11.9491	11.8248	10.9433	11.1688	12.0069	12.5456	12.2181	11.3248	11.9841	11.5337	11.8575	12.0023	11.7806	11.7659	11.3615	M1AEP8	Ran binding protein-1
16.1381	16.6117	16.7408	16.3712	15.4716	16.1874	16.8228	16.4967	16.2216	16.7756	16.7487	17.1617	16.8908	16.8102	16.5317	17.0541	M1AER7	C2H2L domain class transcription factor
18.7579	19.1685	19.2043	18.6706	17.8448	18.4508	18.7049	18.6486	18.9031	19.5148	19.1016	19.3411	19.0092	19.2218	18.8784	19.1072	M1AF17	Chlorophyll a-b binding protein, chloroplastic;Chlorophyll a-b binding protein, chloroplastic;Chlorophyll a-b binding protein, chloroplastic
18.7579	19.1685	19.2043	18.6706	17.8448	18.4508	18.7049	18.6486	18.9031	19.5148	19.1016	19.3411	19.0092	19.2218	18.8784	19.1072	M1DQW0	Chlorophyll a-b binding protein, chloroplastic;Chlorophyll a-b binding protein, chloroplastic;Chlorophyll a-b binding protein, chloroplastic
18.7579	19.1685	19.2043	18.6706	17.8448	18.4508	18.7049	18.6486	18.9031	19.5148	19.1016	19.3411	19.0092	19.2218	18.8784	19.1072	Q41421	Chlorophyll a-b binding protein, chloroplastic;Chlorophyll a-b binding protein, chloroplastic;Chlorophyll a-b binding protein, chloroplastic
13.6817	13.9426	14.2532	13.5213	13.595	14.1335	15.1345	14.5039	14.0824	14.2786	14.6033	14.5498	14.5767	14.9122	14.3206	14.732	M1AF34	3-beta hydroxysteroid dehydrogenase/isomerase
13.8603	14.1274	14.2954	14.2095	13.9033	14.1675	14.2478	14.1791	13.9488	14.3124	14.0142	14.3882	14.2035	14.1477	14.0898	14.2074	M1AF64	Mediator of RNA polymerase II transcription subunit 31
13.8603	14.1274	14.2954	14.2095	13.9033	14.1675	14.2478	14.1791	13.9488	14.3124	14.0142	14.3882	14.2035	14.1477	14.0898	14.2074	M1AF65	Mediator of RNA polymerase II transcription subunit 31
14.3452	18.8053	18.9171	18.7375	10.5065	18.9102	19.1631	19.1154	18.742	18.894	18.9056	19.2447	19.1535	19.0881	18.9644	19.1745	M1AFE1	Protein kinase;Calcium-binding EF-hand
11.655	11.7669	11.9285	9.63233	10.8276	11.3915	10.9959	10.9459	11.6111	11.7255	11.8304	12.3957	12.1518	12.0917	9.13098	12.5614	M1AFE1	Protein kinase;Calcium-binding EF-hand
10.4947	8.91276	14.4989	13.821	13.8839	14.4321	15.2992	14.7803	13.7828	10.0462	11.5622	14.4689	9.93668	14.4024	13.868	10.2719	M1AFF1	CTR1 kinase
12.683	9.31619	13.2654	13.5199	9.24932	13.0689	11.3647	13.1718	13.2428	10.1316	13.3476	13.6005	13.5421	13.7753	13.5962	13.7816	M1AFP8	CASP-like protein
19.0716	19.3232	19.2994	16.0901	16.393	16.6394	16.8966	16.8215	19.0607	19.8273	19.2335	19.4575	20.2555	20.6164	20.2367	20.5036	M1AFT5	Chlorophyll a-b binding protein, chloroplastic
17.5483	17.9867	18.0724	18.2645	17.5816	18.6646	18.2563	18.6711	18.8397	19.3998	19.0816	19.1449	18.7152	19.1329	18.7657	18.7804	M1AFV5	AMP deaminase
14.6851	14.9244	15.054	15.0494	14.9328	15.4409	15.431	15.3268	14.8325	15.278	15.2335	15.2052	15.5216	15.4374	15.3983	15.4611	M1AFV5	AMP deaminase
14.1381	14.3647	14.5904	14.3556	14.1873	14.7232	14.8341	14.6695	15.147	15.5483	15.4397	15.4743	15.157	15.1534	15.0415	15.1438	M1AFV5	AMP deaminase
13.5096	12.0496	14.1584	14.0602	13.4443	14.0563	12.3765	13.5926	10.1069	9.65918	13.119	13.0663	13.535	10.6789	13.4594	12.4306	M1AFV5	AMP deaminase
11.5324	11.3535	9.27752	10.5062	13.0042	10.4676	14.2037	13.9888	14.681	15.2585	15.1946	15.7336	14.4013	14.6194	14.2183	14.3291	M1AFV5	AMP deaminase
10.8628	9.67351	11.9675	10.7783	11.1174	9.59257	11.6432	11.6964	11.817	11.4948	11.3113	10.8608	10.3865	11.809	8.99623	11.2602	M1AFV5	AMP deaminase
11.7435	12.1383	12.2854	11.4928	12.394	12.095	12.4724	12.6973	11.9325	11.9993	12.3528	12.2842	12.4063	12.023	11.8034	12.3694	M1AFW8	Receptor serine-threonine protein kinase
11.7435	12.1383	12.2854	11.4928	12.394	12.095	12.4724	12.6973	11.9325	11.9993	12.3528	12.2842	12.4063	12.023	11.8034	12.3694	M1AFW9	Receptor serine-threonine protein kinase
11.7435	12.1383	12.2854	11.4928	12.394	12.095	12.4724	12.6973	11.9325	11.9993	12.3528	12.2842	12.4063	12.023	11.8034	12.3694	M1AFX0	Receptor serine-threonine protein kinase
11.7435	12.1383	12.2854	11.4928	12.394	12.095	12.4724	12.6973	11.9325	11.9993	12.3528	12.2842	12.4063	12.023	11.8034	12.3694	M1AFX1	Receptor serine-threonine protein kinase
19.0151	19.9232	19.6124	17.5165	18.6641	19.6196	20.2714	20.4061	19.0691	19.2802	19.2655	19.9464	19.3773	19.5562	19.2253	19.9644	M1AFX9	Acidic ribosomal protein P3
16.1839	16.6073	16.7637	16.2743	15.6737	16.484	16.5578	16.5132	15.3369	15.9568	15.7837	15.8818	16.0502	16.3051	15.9146	16.0861	M1AG31	FLZ-type domain-containing protein
18.8151	19.0951	19.3319	19.2292	18.3583	19.0375	19.305	19.2096	17.9456	18.2969	18.1419	18.4303	17.7507	17.8381	17.5832	17.8406	M1AG86	TPR_REGION domain-containing protein
18.8151	19.0951	19.3319	19.2292	18.3583	19.0375	19.305	19.2096	17.9456	18.2969	18.1419	18.4303	17.7507	17.8381	17.5832	17.8406	M1AG87	TPR_REGION domain-containing protein
17.0565	17.2799	17.3223	17.3512	16.4207	17.2041	16.9438	17.1494	15.1827	17.17	16.8824	16.9528	16.4952	16.6954	16.5324	16.6426	M1AG86	TPR_REGION domain-containing protein
17.0565	17.2799	17.3223	17.3512	16.4207	17.2041	16.9438	17.1494	15.1827	17.17	16.8824	16.9528	16.4952	16.6954	16.5324	16.6426	M1AG87	TPR_REGION domain-containing protein
12.8463	13.682	13.7113	9.92658	13.2019	11.1988	14.0421	13.8267	13.0008	13.6264	9.66949	13.7986	13.2278	11.0754	9.86683	13.796	M1AGG8	Uncharacterized protein
13.1171	13.3098	13.9544	13.5704	13.0273	13.4022	13.9444	13.4737	14.3017	14.6254	14.257	14.7703	14.2529	14.1556	13.8061	14.2557	M1AGK6	RNA polymerase II transcriptional coactivator KIWI
15.9816	10.278	16.192	14.6474	10.4112	15.6526	10.3552	11.0313	15.2403	12.2052	15.843	15.0877	10.4638	15.4039	10.4876	16.4487	M1AGP7	WPP domain-interacting protein 2
15.9816	10.8794	16.192	14.6474	10.9883	15.6526	11.1898	10.3445	15.2403	10.7595	15.843	15.0877	10.4638	15.4039	11.5088	16.4487	M1AGP8	WPP domain-interacting protein 2
15.2881	15.4952	15.5718	15.1053	14.6898	10.5689	15.3043	10.4577	15.4138	15.9455	15.5241	11.012	15.6916	15.7431	15.705	15.8733	M1AH33	Chlorophyll a-b binding protein, chloroplastic;Chlorophyll a-b binding protein, chloroplastic
15.2881	15.4952	15.5718	15.1053	14.6898	10.489	15.3043	10.267	15.4138	15.9455	15.5241	9.96128	15.6916	15.7431	15.705	15.8733	M1AH34	Chlorophyll a-b binding protein, chloroplastic;Chlorophyll a-b binding protein, chloroplastic
10.6896	13.6341	15.1793	14.1873	9.79122	11.2329	14.2676	14.263	13.8834	15.2935	15.0861	14.1258	14.1285	14.4834	14.0829	14.4256	M1AH70	NAD-dependent epimerase/dehydratase
16.654	16.7721	16.8408	16.7532	16.2248	16.63	16.7364	16.7068	16.2702	16.4583	16.2039	16.5053	15.8696	15.9599	15.9079	16.0651	M1AHN7	Arf gtpase-activating protein
16.654	16.7721	16.8408	16.7532	16.2248	16.63	16.7364	16.7068	16.2702	16.4583	16.2039	16.5053	15.8696	15.9599	15.9079	16.0651	M1ARB5	Arf gtpase-activating protein
12.0093	12.404	12.5952	12.4053	11.1892	11.8703	12.0085	12.1055	11.5369	12.2211	11.8348	12.4641	11.3997	11.8568	11.8403	11.9822	M1AHW1	Tata-associated factor II 58
12.9027	13.5387	13.2734	13.0978	12.6976	13.3631	13.4249	13.358	13.424	13.5943	9.15515	13.6738	13.8148	13.845	13.4422	13.7915	M1AI31	DEAD-box ATP-dependent RNA helicase 24
12.6195	12.9961	12.9285	11.0267	12.8063	10.5427	13.2575	13.3847	13.2913	13.1624	13.0694	13.4853	13.449	13.4	13.38	13.5424	M1AI87	RNA binding protein
12.6195	12.9961	12.9285	10.5646	12.8063	10.8857	13.2575	13.3847	13.2913	13.1624	13.0694	13.4853	13.449	13.4	13.38	13.5424	M1AI88	RNA binding protein
12.6195	12.9961	12.9285	9.89041	12.8063	9.36277	13.2575	13.3847	13.2913	13.1624	13.0694	13.4853	13.449	13.4	13.38	13.5424	M1AI89	RNA binding protein
14.1956	13.7396	14.5979	14.6181	14.1199	14.346	14.5737	14.5608	14.7082	13.8546	13.5623	15.0892	14.9253	14.9453	14.7034	14.7712	M1AI91	DNA methyltransferase 1-associated protein
14.1956	13.7396	14.5979	14.6181	14.1199	14.346	14.5737	14.5608	14.7082	13.8546	13.5623	15.0892	14.9253	14.9453	14.7034	14.7712	M1AI92	DNA methyltransferase 1-associated protein
10.4998	10.8644	10.4146	10.4602	10.4615	10.1493	10.8962	9.9497	9.84611	10.8747	10.722	12.635	9.80782	10.7119	9.88915	10.9178	M1AI91	DNA methyltransferase 1-associated protein
10.4998	9.53672	10.7598	9.8788	10.4615	10.6707	11.9778	10.6161	9.84611	10.8747	10.6248	12.635	9.80782	10.5652	9.88915	10.9178	M1AI92	DNA methyltransferase 1-associated protein
10.1136	9.97528	10.4463	9.88451	10.6801	9.82095	9.61157	10.9827	12.5967	12.7719	12.4702	12.91	12.4414	12.7171	12.4782	12.7119	M1AIJ8	Succinate dehydrogenase assembly factor 4, mitochondrial
15.0707	14.9171	15.4162	15.327	14.954	15.5085	15.4996	15.4441	15.1309	15.5011	15.1544	15.5573	15.5198	15.6836	15.314	15.5984	M1AIU5	Pumilio domain-containing protein PPD1
15.0707	14.9171	15.4162	15.327	14.954	15.5085	15.4996	15.4441	15.1309	15.5011	15.1544	15.5573	15.5198	15.6836	15.314	15.5984	M1AIU6	Pumilio domain-containing protein PPD1
17.3952	17.7246	17.7087	17.4125	16.7998	17.2854	17.5937	17.4638	17.5593	17.7312	17.6704	18.0037	17.6497	17.6255	17.3802	17.5782	M1AIW1	Ovule receptor-like kinase 28
17.3952	17.7246	17.7087	17.4125	16.7998	17.2854	17.5937	17.4638	17.5593	17.7312	17.6704	18.0037	17.6497	17.6255	17.3802	17.5782	M1AIW2	Ovule receptor-like kinase 28
12.3309	12.6547	12.7655	12.8835	12.3242	12.7602	12.8593	12.8555	12.6596	12.8139	12.7047	13.0369	12.6226	12.5602	12.2403	12.462	M1AIW1	Ovule receptor-like kinase 28
12.3309	12.6547	12.7655	12.8835	12.3242	12.7602	12.8593	12.8555	12.6596	12.8139	12.7047	13.0369	12.6226	12.5602	12.2403	12.462	M1AIW2	Ovule receptor-like kinase 28
16.1838	16.3556	16.5387	16.6332	15.9435	16.4162	16.5531	16.4607	16.658	16.9787	16.8374	17.0139	16.4035	16.5687	16.3774	16.5576	M1AIY2	Uncharacterized protein
15.6538	15.9165	15.9688	15.8328	15.518	15.8108	15.8591	15.9095	15.9334	16.1779	15.9605	16.2595	15.7006	15.7674	15.6109	15.7548	M1AIY2	Uncharacterized protein
11.6663	12.026	12.109	11.9975	11.809	12.1576	12.4091	12.5129	10.2102	11.3613	12.429	12.6688	12.478	9.72891	10.9582	12.5596	M1AIY2	Uncharacterized protein
10.391	13.8615	14.0005	13.89	13.9053	14.2883	14.5881	14.4246	10.6112	14.4605	14.4813	10.274	15.0532	15.03	14.7907	15.1903	M1AIY2	Uncharacterized protein
14.6734	14.8205	14.7605	14.5146	14.047	14.5962	10.9339	9.90306	14.5443	11.2589	14.5756	10.3597	14.8063	14.731	14.7056	14.8889	M1AJ01	Polyadenylate-binding protein;Salt tolerance protein 4;Polyadenylate-binding protein
14.6734	14.8205	14.7605	14.5146	14.047	14.5962	11.0518	11.1844	14.5443	10.9766	14.5756	10.0123	14.8063	14.731	14.7056	14.8889	M1CGU5	Polyadenylate-binding protein;Salt tolerance protein 4;Polyadenylate-binding protein
14.6734	14.8205	14.7605	14.5146	14.047	14.5962	10.8909	10.602	14.5443	11.3275	14.5756	10.7165	14.8063	14.731	14.7056	14.8889	Q3HRW9	Polyadenylate-binding protein;Salt tolerance protein 4;Polyadenylate-binding protein
18.2436	18.7515	18.1671	18.3701	18.2103	18.7912	17.9781	18.8075	18.6478	18.2651	18.1715	18.544	18.7865	19.0408	18.6884	19.1036	M1AJ04	Sucrose transport protein
13.8226	13.8281	13.9475	13.4231	13.5672	13.6897	14.5775	14.0429	13.3221	13.7584	13.9496	13.8982	14.0824	14.4016	14.1457	14.2369	M1AJ15	Phospholipid-transporting ATPase
9.39046	13.3713	13.3454	13.3206	13.3375	13.6879	13.8783	13.9222	13.1885	13.5743	13.1639	13.4136	12.9775	13.0581	13.0327	10.8722	M1AJ68	Alkaline/neutral invertase
13.219	13.6731	13.5378	13.3997	13.2267	13.8172	13.9885	13.775	13.5366	14.1895	13.6717	14.0795	14.4109	14.445	14.081	14.4886	M1AJH1	Receptor protein kinase
12.9569	13.2492	13.3002	13.1958	12.9838	13.569	13.4612	13.7448	13.075	13.2067	13.1055	12.9681	12.6446	13.2965	13.1183	13.2572	M1AJV5	26S proteasome non-ATPase regulatory subunit 2 homolog
12.7741	13.1938	13.4411	12.958	13.211	13.6995	14.604	13.9721	12.1166	12.4034	12.5937	12.9848	13.1086	13.1962	12.7974	13.1806	M1AK75	FLZ-type domain-containing protein
12.7741	13.1938	13.4411	12.958	13.211	13.6995	14.604	13.9721	12.1166	12.4034	12.5937	12.9848	13.1086	13.1962	12.7974	13.1806	M1AK76	FLZ-type domain-containing protein
9.54844	9.99395	10.064	10.3982	10.2728	10.8523	10.06	9.11877	13.3575	11.0365	13.3859	13.6096	10.1753	10.8828	11.1603	10.7383	M1AKA3	Splicing endonuclease positive effector sen1
10.8408	9.4238	9.25801	10.9018	9.22539	9.22183	10.182	11.071	13.3575	9.31745	13.3859	13.6096	10.3899	11.0088	10.1646	9.85457	M1AKA4	Splicing endonuclease positive effector sen1
10.0904	10.3908	9.92717	9.94005	9.89263	10.8868	10.5102	9.77143	13.3575	11.208	13.3859	13.6096	11.9691	11.1786	9.85662	11.0205	M1AKA6	Splicing endonuclease positive effector sen1
14.695	15.1826	14.401	14.0751	14.806	13.4963	14.4819	14.9638	17.055	16.9249	16.9505	17.1459	16.3029	16.3841	16.0925	16.3779	M1AKD9	Heat shock protein 83
13.1777	13.3431	13.2688	13.2977	12.8153	13.2386	13.419	13.4368	13.3153	13.4336	13.5731	13.7344	13.3859	13.6073	13.433	13.716	M1AKW9	Uncharacterized protein
13.0398	13.1752	13.1926	10.6289	12.2211	9.00764	12.6653	10.2834	12.7243	12.9011	12.9442	13.0225	10.3239	9.26401	10.8673	11.0898	M1AKW9	Uncharacterized protein
9.76898	10.7344	9.85031	10.7976	9.80727	10.642	9.8886	10.1657	11.6748	9.39403	10.3413	11.5727	10.9814	9.43232	10.1162	11.2855	M1AKW9	Uncharacterized protein
11.5453	9.68579	11.8194	10.4324	10.0467	10.3958	10.744	10.6633	11.0499	11.6955	11.6851	11.0661	10.178	11.0175	10.5337	11.2707	M1AKW9	Uncharacterized protein
13.871	14.0387	14.0804	14.0178	13.5037	13.8499	14.1397	13.9127	10.2884	14.4146	14.3164	11.0059	14.2033	12.0064	14.0506	9.91393	M1AKX0	Uncharacterized protein
12.4149	13.7149	13.6966	12.0164	11.5647	13.0412	12.8874	13.0674	13.1039	12.2905	13.3669	13.8484	12.3391	10.9183	12.4756	10.9528	M1AKX0	Uncharacterized protein
12.9719	9.9677	10.6721	13.5462	9.29426	13.7369	14.0801	13.8798	13.501	11.0356	13.7006	13.9946	13.6495	13.8227	13.4342	10.2631	M1AKX9	Pom14 protein
9.61305	9.91661	10.2983	10.0171	9.53575	10.6061	9.40358	9.29682	13.068	13.339	13.428	13.6264	13.8112	13.4339	12.9251	13.5344	M1AKZ5	Protein kinase
9.61305	9.91661	10.2983	10.0171	9.53575	10.6061	9.40358	9.29682	13.068	13.339	13.428	13.6264	13.8112	13.4339	12.9251	13.5344	M1B9H2	Protein kinase
10.7903	9.50443	13.2336	13.4069	9.9243	13.5204	13.3698	13.5041	9.80732	13.3508	11.9887	13.3726	12.8012	10.949	13.004	10.1733	M1AL00	Ferredoxin-dependent glutamate synthase 1
14.4547	14.7485	14.6256	14.6129	14.3971	14.5743	14.7289	14.6753	10.0897	14.5643	9.83952	10.0166	14.3732	14.3465	14.332	10.8548	M1AL00	Ferredoxin-dependent glutamate synthase 1
16.108	16.5023	16.6474	16.5479	15.6496	16.3338	16.5377	16.3923	15.9181	16.3817	16.1763	16.468	16.5293	16.5552	16.4072	16.6035	M1AL73	Chloride channel Stclc1
15.5282	15.9062	15.8776	15.781	15.4159	15.9599	16.0473	15.9738	14.8585	15.2808	15.1169	15.3717	15.8479	15.9824	10.3035	15.9814	M1AL73	Chloride channel Stclc1
13.7361	14.2038	14.1966	9.04424	13.5802	10.6207	14.703	14.5214	10.2888	9.2602	10.2075	9.33379	14.5166	14.717	10.2458	14.7592	M1AL73	Chloride channel Stclc1
13.7361	14.2038	14.1966	10.045	13.5802	9.77674	14.703	14.5214	10.1854	11.3133	11.2865	11.2045	14.5166	14.717	9.93519	14.7592	M1AL73	Chloride channel Stclc1
14.3811	9.07915	10.7652	14.7251	14.2229	14.7026	14.9531	15.0307	13.9602	14.7457	10.4468	14.9168	10.0119	14.5753	14.2669	14.7544	M1ALA6	Ripening regulated protein DDTFR10
10.0567	12.8129	11.1584	13.963	10.6211	13.0113	13.4301	13.2076	13.7454	10.1881	13.9404	13.1965	14.2575	13.0914	12.8908	13.0656	M1ALF9	Uncharacterized protein
13.3647	13.535	13.7078	13.6303	13.0603	13.6011	13.4227	13.3214	12.4649	13.0065	12.7237	12.6038	12.6906	12.8091	12.634	12.621	M1ALT3	NIN 1
13.3647	13.535	13.7078	13.6303	13.0603	13.6011	13.4227	13.3214	12.4649	13.0065	12.7237	12.6038	12.6906	12.8091	12.634	12.621	M1ALT4	NIN 1
16.7437	17.0686	17.2215	16.961	16.4508	17.0907	17.9365	17.4248	16.5309	17.0111	16.8761	17.4061	17.0693	17.0394	16.8454	17.3123	M1ALT6	Calcium ion binding protein
14.5636	14.9155	14.9624	14.2085	14.0549	14.5217	15.6499	15.0003	14.0944	14.3865	14.4187	14.9245	14.5706	14.5601	14.248	14.8657	M1ALT6	Calcium ion binding protein
12.7851	15.2455	15.7335	15.1023	14.8771	15.3661	15.3504	15.4836	14.9501	15.1381	15.3395	15.5844	15.3643	15.5469	15.177	12.8689	M1ALT6	Calcium ion binding protein
13.2839	13.6163	13.737	13.3818	12.7764	13.64	13.4596	13.4938	13.9333	14.4269	14.2467	14.6089	13.7391	13.8946	13.5609	13.9692	M1ALT6	Calcium ion binding protein
13.0731	13.0882	13.367	13.3802	12.7511	13.3601	13.1821	13.2243	13.289	13.7063	13.4045	13.8785	13.0921	9.66992	10.6564	13.1216	M1ALT6	Calcium ion binding protein
15.0598	15.3219	15.4929	15.1133	14.8984	15.6007	15.8475	15.7504	16.0408	16.4461	16.2787	16.5884	16.4716	16.6603	16.0656	16.4782	M1ALT7	RING-type E3 ubiquitin transferase
10.0971	10.0749	11.2532	10.9375	10.6485	11.103	10.4515	11.0982	11.0717	9.95697	9.86458	10.877	9.21062	10.3441	10.6581	9.91394	M1ALT7	RING-type E3 ubiquitin transferase
10.0971	10.0957	11.2532	10.9375	10.2917	10.1381	9.09588	9.58557	11.0717	11.208	10.7041	10.877	10.0582	10.3441	10.658	11.7251	M1ALT7	RING-type E3 ubiquitin transferase
15.5818	15.7404	15.9821	15.7139	15.4589	15.9263	16.0209	15.9192	15.781	15.5849	15.6998	16.2372	16.1906	16.1145	16.0917	16.3638	M1ALT7	RING-type E3 ubiquitin transferase
11.2704	11.5001	11.8157	9.56506	11.5102	11.9506	13.4539	12.5978	11.56	12.0788	12.3564	12.4538	12.7276	12.8241	12.5301	12.9825	M1ALT7	RING-type E3 ubiquitin transferase
11.073	11.6446	12.0413	11.0242	10.0822	11.0753	12.2755	11.9282	10.7128	10.8684	11.2555	11.3596	10.6091	10.9605	10.1893	11.2311	M1ALT7	RING-type E3 ubiquitin transferase
13.691	14.8712	14.7748	13.8683	13.8664	14.3509	14.6673	14.3043	14.8743	15.1861	14.3533	15.2068	14.0931	15.2567	15.1073	15.3146	M1ALZ1	Alkaline/neutral invertase
10.6345	12.1634	11.859	9.02156	12.3191	9.94108	11.6054	12.4396	10.9016	11.2486	11.0171	11.6152	11.4645	11.2044	11.4189	11.3974	M1ALZ6	Endoplasmin homolog
16.2424	16.5733	16.5689	16.2133	15.9364	16.4196	16.6366	16.6449	16.6057	16.9616	16.6469	16.9382	16.8757	16.9703	16.6718	17.0197	M1AM15	Alba domain-containing protein
19.6656	20.0974	20.0396	19.5127	19.3931	19.8295	20.117	20.0294	20.1463	20.4272	20.1442	20.4053	20.3445	20.3886	20.155	20.4284	M1AM16	Alba domain-containing protein
15.8568	16.0937	16.1521	15.9155	15.4149	15.9463	15.924	15.8981	15.7627	16.0429	16.0195	16.0772	16.1312	16.0793	15.9621	16.1355	M1AM16	Alba domain-containing protein
13.2777	13.4245	13.8231	13.0256	13.0075	13.5997	14.6021	14.0686	12.4638	12.7478	12.6611	13.1623	13.7032	13.8465	13.3812	13.8629	M1AM40	25 kDa protein dehydrin
10.7099	10.5909	10.6657	11.1689	10.1097	10.8508	10.7083	9.87677	10.9082	11.0441	11.0337	11.5561	11.2307	10.5158	11.0835	11.674	M1AM89	Protein-serine/threonine phosphatase
16.2057	11.4694	16.6919	9.65993	9.38748	10.3327	11.0108	11.5982	16.4739	16.8929	9.09186	16.877	9.43277	16.8225	10.5162	10.4999	M1AM94	Glyceraldehyde-3-phosphate dehydrogenase
15.3528	15.1841	15.2053	14.8585	15.7456	15.2471	15.356	15.1969	15.3458	15.1414	15.068	15.1373	15.2623	15.1691	15.3357	15.2661	M1AM94	Glyceraldehyde-3-phosphate dehydrogenase
12.0788	12.5738	12.6252	10.1185	11.3325	12.4519	12.4559	10.3079	12.084	10.1075	12.8567	12.9705	12.6263	12.7701	11.2597	12.7305	M1AM94	Glyceraldehyde-3-phosphate dehydrogenase
14.1531	14.1995	14.5029	14.2645	13.5018	14.1148	14.2254	14.1311	14.7286	15.0401	14.9911	14.995	15.0494	15.0598	14.9129	14.9917	M1AM94	Glyceraldehyde-3-phosphate dehydrogenase
11.2186	11.2994	11.5262	11.5182	10.4253	11.5039	11.7282	11.95	11.3241	11.7837	11.8561	12.0444	11.6793	12.0397	11.5457	12.0524	M1AM94	Glyceraldehyde-3-phosphate dehydrogenase
9.91856	11.4888	12.2891	9.73932	9.51982	9.97881	9.30964	9.99148	12.7885	13.8882	13.3256	13.345	13.9191	14.1045	13.6189	14.03	M1AM94	Glyceraldehyde-3-phosphate dehydrogenase
9.95084	14.5342	14.4558	10.9037	10.2034	14.1415	14.9794	9.82513	11.0386	14.6161	14.7445	14.9191	11.3244	10.1512	10.9444	15.3909	M1AM94	Glyceraldehyde-3-phosphate dehydrogenase
9.80104	10.7483	9.88237	10.8297	9.83933	10.7866	13.2647	13.2948	10.4547	10.7613	10.3734	9.34477	10.493	9.46438	10.4117	13.9183	M1AM98	Hexose transporter
10.4222	16.1777	10.3966	16.3367	16.2899	16.8491	16.4452	16.6187	16.7328	10.8282	9.17551	11.3673	10.9884	10.3559	11.4433	11.1638	M1AM98	Hexose transporter
13.906	14.3966	14.5165	9.38544	14.9032	15.6197	16.1896	15.8849	13.7093	14.1445	14.0203	14.2839	15.2338	15.416	14.7209	15.4059	M1AM98	Hexose transporter
16.9001	17.1241	17.326	16.9599	16.1565	16.6536	17.883	17.2506	17.0656	17.338	17.4913	17.8198	17.5208	17.4978	17.1003	17.6245	M1AMF9	Molybdopterin cofactor sulfurase
15.2847	10.1229	14.0685	13.9817	13.2829	10.0097	15.3995	15.2327	13.9123	14.1637	14.0836	15.8228	14.1576	13.8476	13.7991	13.9696	M1AMF9	Molybdopterin cofactor sulfurase
14.1162	14.4184	14.7262	13.9643	14.0364	14.7739	14.6789	14.6788	14.5494	14.9255	14.8673	14.8334	15.1381	15.2892	15.0049	15.1897	M1AMF9	Molybdopterin cofactor sulfurase
10.2349	14.623	14.7053	14.6634	11.0963	10.9535	10.3411	14.6142	14.5823	15.0611	14.9677	14.9033	12.4592	14.8551	14.7015	14.8503	M1AMF9	Molybdopterin cofactor sulfurase
10.2131	14.4414	14.4006	14.5495	13.6109	14.2564	9.4746	12.501	14.2527	14.8633	14.6457	14.8483	14.4988	14.6852	14.6119	14.5052	M1AMF9	Molybdopterin cofactor sulfurase
11.6013	11.6422	11.7451	12.1494	10.323	11.6687	12.0096	11.3015	11.5804	12.0568	12.3634	10.5965	12.311	11.02	12.0776	12.4277	M1AMF9	Molybdopterin cofactor sulfurase
16.3428	16.7959	16.7328	16.6776	16.2815	16.5074	17.1332	16.7042	15.979	16.2172	16.3344	16.4728	16.9292	16.8215	16.6039	17.1981	M1AMJ1	Translation initiation factor 2b, delta subunit
10.4877	11.8305	10.7585	14.6609	10.9521	10.315	11.0963	10.7263	9.70041	10.1347	10.0381	15.0221	15.5752	10.8294	15.2443	15.7869	M1AMJ1	Translation initiation factor 2b, delta subunit
9.92953	14.5198	14.2145	14.3613	14.4294	14.7925	14.7359	14.6442	14.3859	14.6044	14.5989	14.4377	14.3647	14.6932	14.5326	14.4126	M1AMJ1	Translation initiation factor 2b, delta subunit
15.5525	15.7378	16.0143	15.7708	15.0827	15.8284	15.6284	15.7304	16.0853	16.1081	16.1177	16.6145	16.6857	16.4861	16.1923	16.7774	M1AMJ3	DNA double-strand break repair rad50 ATPase
10.4877	9.52244	9.89323	8.74833	10.943	9.0118	10.4574	12.6581	13.6527	13.8006	13.2336	13.8747	13.9926	14.0517	13.7379	13.7896	M1AMJ3	DNA double-strand break repair rad50 ATPase
12.5294	12.9918	13.1314	12.893	12.8247	13.0502	13.2196	13.1706	13.4493	13.7913	13.4413	14.0404	13.6825	13.7598	13.5612	13.9801	M1AMJ3	DNA double-strand break repair rad50 ATPase
10.4402	10.9083	10.95	10.4432	9.69203	10.8131	11.0855	10.1314	11.5304	11.2624	11.4691	11.8842	11.5769	11.8916	11.5094	11.706	M1AN31	DNA-binding protein RHL1
10.4402	10.9083	10.95	10.4432	9.69203	10.8131	11.0216	10.1314	11.5304	11.2624	11.4691	11.8842	11.5769	11.8916	11.5094	11.706	M1AN32	DNA-binding protein RHL1
11.35	11.7683	11.3378	10.9415	10.7002	10.9569	11.0507	11.2944	11.8756	12.2293	12.1884	12.306	12.9119	12.7221	12.522	13.0515	M1ANE1	Remorin 2
11.35	11.7683	11.3378	10.9415	10.7002	10.9569	11.0507	11.2944	11.8756	12.2293	12.1884	12.306	12.9119	12.7221	12.522	13.0515	M1ANE2	Remorin 2
10.1098	12.3033	12.0854	10.2997	10.9807	11.1962	11.4675	10.8856	9.92206	10.3697	12.6441	13.239	12.3397	10.6515	10.3952	12.918	M1ANL7	ATP binding protein
10.3188	12.3033	12.0854	10.6129	10.9807	11.1962	11.4675	10.7048	10.4031	9.75393	12.6441	13.239	12.3397	10.8067	11.5559	12.918	M1ANL8	ATP binding protein
13.0116	13.6135	14.0225	13.6307	12.1931	13.7938	14.2075	14.1456	14.0926	14.3388	14.2577	14.5873	14.103	14.2075	14.1333	14.0998	M1ANS6	Exo84_C domain-containing protein
10.3731	13.5038	14.8218	14.3067	10.0825	9.64227	13.7819	13.5848	10.785	13.3319	14.0169	13.6701	11.6484	10.189	13.5262	13.1623	M1AP53	Serine/threonine protein kinase
14.5051	14.8128	14.8574	14.7704	14.4798	14.9025	15.1229	15.0026	13.8123	14.2258	13.7956	14.2087	14.3168	14.4246	14.4449	14.4101	M1AP53	Serine/threonine protein kinase
12.9006	13.0612	13.3756	13.0556	12.9763	13.4174	13.493	13.5182	11.7458	12.6063	12.2906	12.7002	12.4684	12.8022	12.7359	12.7424	M1AP53	Serine/threonine protein kinase
12.52	12.4762	12.7526	12.2887	12.4754	12.459	12.8312	12.8014	11.7407	11.8947	11.8817	12.1698	12.221	12.0999	12.2026	12.0769	M1AP53	Serine/threonine protein kinase
16.8251	17.2139	17.3778	17.197	16.7719	17.4178	17.8675	17.6473	17.1462	17.7266	17.5768	17.7734	18.3866	18.4832	18.1292	18.7657	M1APG1	Protein phosphatase-2c
14.9908	15.3202	15.3833	15.3272	14.4074	15.1545	15.6208	15.1427	14.5733	15.0521	15.1255	15.3584	15.2483	15.0612	10.0682	15.3665	M1APG1	Protein phosphatase-2c
12.6436	14.2893	14.6205	14.1219	9.7671	12.4496	10.4944	14.8313	10.4917	14.4081	14.4947	14.5715	13.9152	14.2786	9.99115	13.9698	M1APL2	Trehalose synthase
15.4202	15.6761	15.7923	15.6815	15.1918	15.5963	15.6893	15.8219	15.8403	16.1942	15.9049	16.2369	16.1791	16.3028	16.0736	16.3153	M1APN1	PWWP domain-containing protein
15.3323	16.3925	15.6703	15.4825	15.0314	16.2042	15.5463	15.4416	15.7258	16.0772	14.9617	16.1063	15.8808	15.3339	15.1815	15.984	M1AQ04	Sodium/hydrogen exchanger
15.3323	16.3925	15.6703	15.4825	15.0314	16.2042	15.5463	15.4416	15.7258	16.0772	14.9617	16.1063	15.8808	15.3339	15.1815	15.984	M1AQ05	Sodium/hydrogen exchanger
15.3979	15.2413	15.3694	13.63	14.422	13.8663	13.9731	14.2787	13.3161	11.3898	14.1565	13.173	13.684	13.4045	13.7217	14.6932	M1AQ04	Sodium/hydrogen exchanger
14.8145	15.1873	15.344	13.4682	14.3711	13.7259	13.9072	14.1804	13.0455	10.0569	14.0029	12.9951	13.4846	13.267	13.5158	14.6353	M1AQ04	Sodium/hydrogen exchanger
15.3979	15.2413	15.3694	13.63	14.422	13.8663	13.9731	14.2787	13.3161	11.3898	14.1565	13.173	13.684	13.4045	13.7217	14.6932	M1AQ05	Sodium/hydrogen exchanger
14.8145	15.1873	15.344	13.4682	14.3711	13.7259	13.9072	14.1804	13.0455	10.3444	14.0029	12.9951	13.4846	13.267	13.5158	14.6353	M1AQ05	Sodium/hydrogen exchanger
9.36395	10.8685	10.8836	13.5992	13.0703	13.4934	9.79937	10.8046	12.318	12.6622	9.94618	11.2711	13.4069	13.6459	11.5379	13.5769	M1AQ04	Sodium/hydrogen exchanger
9.67686	10.0538	11.1442	13.5992	13.0703	13.4934	10.1439	10.5836	12.318	12.6622	9.56176	10.4724	13.4069	13.6459	9.94819	13.5769	M1AQ05	Sodium/hydrogen exchanger
14.5433	14.8409	15.0253	14.7344	14.1206	15.1358	14.3782	14.8767	13.3478	13.938	13.5206	13.5091	14.3643	14.7775	14.628	14.7677	M1AQ04	Sodium/hydrogen exchanger
14.5433	14.8409	15.0253	14.7344	14.1206	15.1358	14.3782	14.8767	13.3478	13.938	13.5206	13.5091	14.3643	14.7775	14.628	14.7677	M1AQ05	Sodium/hydrogen exchanger
16.8707	17.1569	17.3528	16.9099	16.1712	16.4406	17.7734	16.936	11.5473	9.97212	11.4322	11.4607	9.40093	10.2711	9.48226	10.5109	M1AQ04	Sodium/hydrogen exchanger
16.8707	17.1569	17.3528	16.9099	16.1712	16.4406	17.7734	16.936	10.4417	10.6365	9.90099	10.3713	9.40093	9.80531	9.48226	10.5109	M1AQ05	Sodium/hydrogen exchanger
10.8371	11.2319	10.9377	9.9636	8.54347	11.5643	11.7661	12.0251	11.8017	11.759	11.6859	12.3923	11.9675	12.4464	12.0417	12.5413	M1AQ51	Violaxanthin de-epoxidase
10.8371	11.2319	10.6115	9.83199	10.6163	11.5643	11.7661	12.0251	11.8017	11.759	11.6859	12.3923	11.9675	12.4464	12.0417	12.5413	M1AQ52	Violaxanthin de-epoxidase
13.4204	12.0046	13.9223	13.6263	13.5875	13.8577	14.0052	14.0157	10.3468	14.2047	14.1082	14.3277	14.069	14.0883	13.8966	13.7473	M1AQG2	RNA binding protein
10.3078	11.5553	14.8534	14.8077	10.8481	15.2093	15.4896	15.4267	14.9115	15.1462	15.0536	15.2876	15.3559	15.457	15.0507	15.3557	M1AQH8	Uncharacterized protein
10.0656	12.4842	14.8534	14.8077	11.1027	15.2093	15.4896	15.4267	14.9115	15.1462	15.0536	15.2876	15.3559	15.457	15.0507	15.3557	M1C897	Uncharacterized protein
15.8799	16.4376	16.5871	16.2378	15.644	16.2818	16.2324	16.3768	15.6814	15.9802	16.0586	16.3784	16.1959	16.3121	16.0124	16.6144	M1AQN6	Secretory carrier-associated membrane protein
15.8799	16.4376	16.5871	16.2378	15.644	16.2818	16.2324	16.3768	15.6814	15.9802	16.0586	16.3784	16.1959	16.3121	16.0124	16.6144	M1AQN7	Secretory carrier-associated membrane protein
17.3752	17.6004	17.6353	17.2243	17.5978	17.2375	17.731	17.9837	16.7705	17.6655	17.2621	17.0936	17.4623	17.0038	17.3762	16.0201	M1AQQ0	Lupus la ribonucleoprotein
13.7063	13.993	14.8982	14.4897	13.0943	13.8348	13.8732	13.0578	13.9616	14.9654	14.0871	15.2389	14.4176	13.9736	14.3965	11.0883	M1AQY3	NOI
12.9864	10.8394	10.0389	13.329	10.4623	10.5802	11.0174	10.3402	14.4772	14.8146	14.6699	9.51815	15.0739	15.1514	14.8395	15.2131	M1ARN0	Amino acid transporter
10.545	10.1046	10.8646	10.4744	9.8932	10.8176	12.5739	11.7329	10.6606	12.0154	12.0228	11.8914	11.3487	11.7619	10.9331	12.1872	M1ARN4	Ribulose bisphosphate carboxylase/oxygenase activase 1, chloroplastic
10.545	10.1046	10.8646	10.4744	9.8932	10.8176	12.5739	11.7329	10.6606	12.0154	12.0228	11.8914	11.3487	11.7619	10.9331	12.1872	M1ARN4	Ribulose bisphosphate carboxylase/oxygenase activase 1, chloroplastic
9.06102	8.40334	8.74697	9.19316	10.0161	7.09275	10.0974	9.23145	8.45544	9.25417	9.07315	9.43192	10.6698	9.64114	10.5884	9.55982	M1ASB4	Uncharacterized protein
19.5218	19.8179	19.8847	19.8154	19.5195	20.0089	20.1731	20.0031	19.2441	19.5786	19.4596	19.7957	20.3818	20.3961	20.3289	20.4251	M1ASB9	Eukaryotic translation initiation factor 3 subunit
17.0456	17.4135	17.4107	17.4972	17.2654	17.7419	17.8649	17.7156	17.303	12.487	17.5449	17.6042	19.2684	19.3165	19.2365	19.3126	M1ASB9	Eukaryotic translation initiation factor 3 subunit
10.9831	9.08753	10.4139	11.1048	9.47789	10.5373	11.4949	11.1436	11.2002	11.1714	10.8873	11.4604	14.4366	14.4464	14.4404	14.6231	M1ASB9	Eukaryotic translation initiation factor 3 subunit
10.0312	10.7617	11.4143	9.93641	9.50029	9.58868	10.1508	9.28481	10.7298	11.0533	10.6035	8.67932	14.4366	14.4464	14.4404	14.6231	M1ASB9	Eukaryotic translation initiation factor 3 subunit
15.7707	16.5923	16.4612	16.4767	15.5151	16.3185	15.8816	16.3546	15.4025	16.0209	15.7375	15.2306	16.9819	17.2484	17.4194	17.3344	M1ASB9	Eukaryotic translation initiation factor 3 subunit
14.382	14.7471	14.6738	12.954	13.2451	13.663	15.281	14.5112	13.1408	13.4704	13.6133	14.4319	13.6401	13.7154	13.391	14.1815	M1ASB9	Eukaryotic translation initiation factor 3 subunit
11.6808	12.3786	11.6767	10.5727	11.4329	9.52196	11.6784	11.8849	11.1158	10.4803	10.1727	9.50887	14.4655	13.7875	14.4247	14.44	M1ASB9	Eukaryotic translation initiation factor 3 subunit
16.6415	17.0632	17.0944	16.9158	15.8223	16.6238	17.1979	16.9918	16.2585	16.776	16.8314	17.0724	16.5744	16.7447	16.4498	16.9236	M1ASB9	Eukaryotic translation initiation factor 3 subunit
9.82395	10.4379	9.57191	9.6457	9.64991	8.96506	10.8009	9.86268	11.9456	10.9289	9.95733	10.8476	10.5991	10.4489	11.541	10.8859	M1ASB9	Eukaryotic translation initiation factor 3 subunit
14.1348	14.3611	14.3258	14.5555	14.2153	14.6432	14.7966	14.7522	13.1747	13.3275	13.1184	13.363	15.2902	15.2696	15.0364	15.175	M1ASB9	Eukaryotic translation initiation factor 3 subunit
18.7231	18.896	19.0704	19.0808	18.6609	18.8859	19.0716	19.0499	19.1725	19.3985	19.2463	19.4842	19.3779	19.3791	19.2342	19.3636	M1ASG0	Arginine/serine-rich protein
18.7231	18.896	19.0704	19.0808	18.6609	18.8859	19.0716	19.0499	19.1725	19.3985	19.2463	19.4842	19.3779	19.3791	19.2342	19.3636	M1ASG1	Arginine/serine-rich protein
17.8873	18.1406	18.2552	17.4573	17.93	18.155	18.2496	18.3352	18.3561	18.4392	18.4329	18.6062	18.7273	18.8813	18.6086	18.7917	M1ASG0	Arginine/serine-rich protein
17.8873	18.1406	18.2552	17.4573	17.93	18.155	18.2496	18.3352	18.3561	18.4392	18.4329	18.6062	18.7273	18.8813	18.6086	18.7917	M1ASG0	Arginine/serine-rich protein
17.8873	18.1406	18.2552	17.4573	17.93	18.155	18.2496	18.3352	18.3561	18.4392	18.4329	18.6062	18.7273	18.8813	18.6086	18.7917	M1ASG1	Arginine/serine-rich protein
17.8873	18.1406	18.2552	17.4573	17.93	18.155	18.2496	18.3352	18.3561	18.4392	18.4329	18.6062	18.7273	18.8813	18.6086	18.7917	M1ASG1	Arginine/serine-rich protein
15.921	15.9991	16.3349	16.345	15.649	16.0285	16.0935	16.1763	17.4677	17.7492	17.5233	17.7582	17.6855	17.741	17.6465	17.7921	M1ASG0	Arginine/serine-rich protein
15.921	15.9991	16.3349	16.345	15.649	16.0285	16.0935	16.1763	17.4677	17.7492	17.5233	17.7582	17.6855	17.741	17.6465	17.7921	M1ASG1	Arginine/serine-rich protein
16.0243	16.2021	16.483	15.8687	16.1732	16.5526	16.5652	16.5762	16.4617	16.7127	16.7077	16.9396	16.8517	16.9579	16.703	16.678	M1ASG0	Arginine/serine-rich protein
16.0243	16.2021	16.483	15.8687	16.1732	16.5526	16.5652	16.5762	16.4617	16.7127	16.7077	16.9396	16.8517	16.9579	16.703	16.678	M1ASG0	Arginine/serine-rich protein
16.0243	16.2021	16.483	15.8687	16.1732	16.5526	16.5652	16.5762	16.4617	16.7127	16.7077	16.9396	16.8517	16.9579	16.703	16.678	M1ASG0	Arginine/serine-rich protein
16.0243	16.2021	16.483	15.8687	16.1732	16.5526	16.5652	16.5762	16.4617	16.7127	16.7077	16.9396	16.8517	16.9579	16.703	16.678	M1ASG0	Arginine/serine-rich protein
16.0243	16.2021	16.483	15.8687	16.1732	16.5526	16.5652	16.5762	16.4617	16.7127	16.7077	16.9396	16.8517	16.9579	16.703	16.678	M1ASG1	Arginine/serine-rich protein
16.0243	16.2021	16.483	15.8687	16.1732	16.5526	16.5652	16.5762	16.4617	16.7127	16.7077	16.9396	16.8517	16.9579	16.703	16.678	M1ASG1	Arginine/serine-rich protein
16.0243	16.2021	16.483	15.8687	16.1732	16.5526	16.5652	16.5762	16.4617	16.7127	16.7077	16.9396	16.8517	16.9579	16.703	16.678	M1ASG1	Arginine/serine-rich protein
16.0243	16.2021	16.483	15.8687	16.1732	16.5526	16.5652	16.5762	16.4617	16.7127	16.7077	16.9396	16.8517	16.9579	16.703	16.678	M1ASG1	Arginine/serine-rich protein
16.1725	16.2787	16.3821	16.4766	15.7879	16.3893	16.2758	16.4604	16.3413	16.5873	15.2649	16.7365	16.245	16.5967	16.5311	16.6648	M1ASG0	Arginine/serine-rich protein
16.1725	16.2787	16.3821	16.4766	15.7879	16.3893	16.2758	16.4604	16.3413	16.5873	15.2649	16.7365	16.245	16.5967	16.5311	16.6648	M1ASG1	Arginine/serine-rich protein
14.9033	15.1223	14.8909	15.3828	14.4326	14.9837	15.0068	15.1516	14.8674	15.3869	13.1665	15.3687	14.7894	15.1796	15.1762	15.3134	M1ASG0	Arginine/serine-rich protein
14.9033	15.1223	14.8909	15.3828	14.4326	14.9837	15.0068	15.1516	14.8674	15.3869	13.1665	15.3687	14.7894	15.1796	15.1762	15.3134	M1ASG1	Arginine/serine-rich protein
14.2465	14.6391	14.4536	14.8671	14.2337	14.7705	14.5105	14.7435	14.6032	15.0177	14.4568	14.8581	14.7895	14.9678	14.6282	15.0584	M1ASG0	Arginine/serine-rich protein
14.2465	14.6391	14.4536	14.8671	14.2337	14.7705	14.5105	14.7435	14.6032	15.0177	14.4568	14.8581	14.7895	14.9678	14.6282	15.0584	M1ASG1	Arginine/serine-rich protein
13.4274	13.2729	13.2511	13.369	13.3398	13.2039	13.4373	13.1849	13.4384	13.1557	13.4649	13.2575	13.8163	13.4572	13.4747	13.2801	M1ASG0	Arginine/serine-rich protein
13.4274	13.2729	13.2511	13.369	13.3398	13.2039	13.4373	13.1849	13.4384	13.1557	13.4649	13.2575	13.8163	13.4572	13.4747	13.2801	M1ASG1	Arginine/serine-rich protein
10.2083	10.8595	10.4384	9.14266	9.68217	12.3327	12.5701	11.2955	12.9417	12.9777	11.1656	13.1253	13.0899	13.4363	13.0696	13.1615	M1ASG2	Uncharacterized protein
10.8614	10.8595	8.93214	10.0802	8.82097	12.3327	12.5701	10.6238	12.9417	12.9777	10.3999	13.1253	13.0899	13.4363	13.0696	13.1615	M1ASG3	Uncharacterized protein
14.2805	14.5848	14.6972	14.5891	13.8967	10.8167	9.69378	14.4634	14.7437	14.8201	14.8815	15.029	14.8666	14.9285	14.8224	15.0468	M1ASL9	COP9 signalosome complex subunit 6
15.2916	15.6558	15.8519	15.7641	15.0611	15.8471	16.1395	16.1008	15.4386	16.0338	15.851	16.267	15.8121	15.9496	15.5811	16.1229	M1ASM0	Phosphatase 2C family protein;Phosphatase 2C family protein;Phosphatase 2C family protein;Phosphatase 2C family protein;Protein phosphatase-2c
15.2916	15.6558	15.8519	15.7641	15.0611	15.8471	16.1395	16.1008	15.4386	16.0338	15.851	16.267	15.8121	15.9496	15.5811	16.1229	M1ASM1	Phosphatase 2C family protein;Phosphatase 2C family protein;Phosphatase 2C family protein;Phosphatase 2C family protein;Protein phosphatase-2c
15.2916	15.6558	15.8519	15.7641	15.0611	15.8471	16.1395	16.1008	15.4386	16.0338	15.851	16.267	15.8121	15.9496	15.5811	16.1229	M1ASM2	Phosphatase 2C family protein;Phosphatase 2C family protein;Phosphatase 2C family protein;Phosphatase 2C family protein;Protein phosphatase-2c
15.2916	15.6558	15.8519	15.7641	15.0611	15.8471	16.1395	16.1008	15.4386	16.0338	15.851	16.267	15.8121	15.9496	15.5811	16.1229	M1ASM3	Phosphatase 2C family protein;Phosphatase 2C family protein;Phosphatase 2C family protein;Phosphatase 2C family protein;Protein phosphatase-2c
15.2916	15.6558	15.8519	15.7641	15.0611	15.8471	16.1395	16.1008	15.4386	16.0338	15.851	16.267	15.8121	15.9496	15.5811	16.1229	M1C034	Phosphatase 2C family protein;Phosphatase 2C family protein;Phosphatase 2C family protein;Phosphatase 2C family protein;Protein phosphatase-2c
10.7685	11.2521	9.43007	9.86669	10.0133	10.528	11.2472	10.2784	12.09	13.0645	12.84	12.9022	12.7578	12.7184	12.6775	13.0832	M1ASN6	Pyruvate orthophosphate dikinase regulatory protein
10.6399	9.97002	10.8446	9.33746	9.69257	10.5351	9.09463	10.0808	15.9068	11.0403	10.2293	10.1881	16.8323	16.8488	11.1795	16.8863	M1ASR2	Plasma membrane polypeptide
15.3613	15.827	16.043	15.8178	14.8079	15.5893	16.071	15.8978	16.1627	16.7211	16.6145	17.0695	17.2311	17.2044	16.9978	17.3416	M1ASR2	Plasma membrane polypeptide
11.4577	10.8009	10.554	10.148	10.6774	10.5803	11.433	10.6749	12.3714	12.6837	12.6383	12.9795	12.5481	12.5712	12.4487	12.68	M1ASR2	Plasma membrane polypeptide
16.1435	16.5107	16.5315	16.6577	15.7572	16.3093	16.3343	16.3041	10.4346	16.1126	15.9478	16.1509	15.758	15.8204	15.7939	10.1808	M1ASV4	Dynein light chain
15.1817	10.3962	15.4503	15.2551	9.7292	14.5008	11.0363	10.6323	10.6629	15.2214	10.6084	15.3105	15.0937	15.1126	15.0096	10.6159	M1AT64	Chloroplast protein import component Toc159
10.0202	10.909	12.5529	12.1033	11.3067	10.3063	9.8711	10.4334	10.1481	13.4231	13.2726	13.7578	11.4798	13.2075	11.2208	9.86525	M1ATI2	Truncated protein, similar to cell wall surface anchor family protein (Fragment 2);Truncated protein, similar to cell wall surface anchor family protein (Fragment 2)
8.48775	9.35089	12.5529	12.1033	11.3067	10.6556	11.1197	11.4651	10.2175	13.4231	13.2726	13.7578	10.1211	13.2075	10.4842	10.7567	M1ATI3	Truncated protein, similar to cell wall surface anchor family protein (Fragment 2);Truncated protein, similar to cell wall surface anchor family protein (Fragment 2)
12.5301	12.443	12.8732	12.6332	12.3225	12.35	12.7799	12.3165	12.366	12.8638	12.1865	12.6028	12.7712	12.2619	12.2121	12.5965	M1ATJ3	TAFII21
14.5075	11.2485	14.7671	14.7549	14.0967	14.3988	9.94745	14.6722	14.0444	14.6563	14.3767	14.9416	12.0429	14.6417	14.6233	14.8956	M1ATK6	CDC5
11.6002	12.192	12.5238	12.1299	11.2927	12.3049	11.9674	12.662	12.1246	12.3962	12.5157	12.6295	12.5146	12.648	12.3849	12.5146	M1ATQ7	Glyceraldehyde-3-phosphate dehydrogenase
13.6476	12.2301	13.9471	11.1788	10.5749	10.3369	9.87146	13.6144	12.0731	10.0593	14.2133	9.96378	13.7922	11.7787	13.6094	12.9007	M1ATQ7	Glyceraldehyde-3-phosphate dehydrogenase
11.1432	9.74849	11.4628	9.23638	10.8497	11.3193	12.0292	11.622	13.0982	13.3606	13.3981	13.9268	13.9423	13.4042	13.2052	13.9362	M1ATQ7	Glyceraldehyde-3-phosphate dehydrogenase
10.1636	10.7046	11.2602	10.9319	10.9245	10.4737	9.80036	10.5806	13.5314	13.5291	13.3868	13.5065	11.1504	10.3631	12.0452	10.4884	M1AU27	NAD(P)-bd_dom domain-containing protein;Uncharacterized protein;NAD(P)-bd_dom domain-containing protein
9.76518	9.39901	10.7356	8.85353	10.9245	10.1794	10.1704	9.95905	13.5314	13.5291	13.3868	13.5065	10.4395	10.3735	12.0452	10.4411	M1AU29	NAD(P)-bd_dom domain-containing protein;Uncharacterized protein;NAD(P)-bd_dom domain-containing protein
10.6067	9.34232	10.041	10.2611	10.9245	9.78065	11.0422	9.33142	13.5314	13.5291	13.3868	13.5065	10.7565	9.75239	12.0452	11.1989	M1AU30	NAD(P)-bd_dom domain-containing protein;Uncharacterized protein;NAD(P)-bd_dom domain-containing protein
14.7537	15.013	15.0551	15.1333	14.7922	14.9824	15.296	15.3131	14.1906	14.5435	14.461	10.6706	14.5141	14.76	14.7729	14.9899	M1AU78	ATP synthase subunit delta', mitochondrial
14.9183	15.15	15.3124	15.1214	14.8298	15.3362	15.5686	15.5102	14.9559	15.189	15.1265	15.435	15.2962	15.3203	15.2125	15.4873	M1AUA3	Uncharacterized protein
14.9183	15.15	15.3124	15.1214	14.8298	15.3362	15.5686	15.5102	14.9559	15.189	15.1265	15.435	15.2962	15.3203	15.2125	15.4873	M1AUA4	Uncharacterized protein
12.9516	12.4711	13.0588	12.7897	12.9522	13.084	13.2941	13.4489	13.0198	12.9093	12.923	13.0418	12.4357	13.071	12.4562	12.6719	M1AUA3	Uncharacterized protein
12.9516	12.4711	13.0588	12.7897	12.9522	13.084	13.2941	13.4489	13.0198	12.9093	12.923	13.0418	12.4357	13.071	12.4562	12.6719	M1AUA4	Uncharacterized protein
17.405	17.5615	17.641	17.4359	17.4561	17.871	17.7603	17.8236	15.4743	15.7866	15.4513	15.7951	16.879	17.0258	16.6972	16.8855	M1AUR8	Vacuolar cation/proton exchanger
15.5041	15.6643	15.5387	15.2382	15.4429	15.6999	15.3259	15.3873	10.0759	10.3531	11.5538	11.0709	13.8323	13.9609	13.6546	13.5521	M1AUR8	Vacuolar cation/proton exchanger
14.8408	14.6563	15.0149	14.8499	14.5066	14.8599	15.0018	14.938	14.5998	14.6006	14.6181	14.7827	15.1103	15.0483	14.695	14.8156	M1AV60	Nt-Rab11e protein
14.8408	14.6563	15.0149	14.8499	14.5066	14.8599	15.0018	14.938	14.5998	14.6006	14.6181	14.7827	15.1103	15.0483	14.695	14.8156	M1BDM9	Nt-Rab11e protein
17.7415	18.0337	18.0516	18.0435	16.9524	17.7676	17.799	17.5782	17.4089	17.8753	17.5775	18.1049	17.8047	17.7224	17.5979	17.8974	M1AV72	Nucleic acid binding protein
17.7415	18.0337	18.0516	18.0435	16.9524	17.7676	17.799	17.5782	17.4089	17.8753	17.5775	18.1049	17.8047	17.7224	17.5979	17.8974	M1AV73	Nucleic acid binding protein
17.7415	18.0337	18.0516	18.0435	16.9524	17.7676	17.799	17.5782	17.4089	17.8753	17.5775	18.1049	17.8047	17.7224	17.5979	17.8974	M1AV74	Nucleic acid binding protein
17.6532	18.1707	18.181	18.1871	17.3009	17.9965	18.4373	18.3899	17.248	17.8662	17.568	18.158	17.7144	17.5729	17.4362	17.8901	M1AV72	Nucleic acid binding protein
17.6532	18.1707	18.181	18.1871	17.3009	17.9965	18.4373	18.3899	17.248	17.8662	17.568	18.158	17.7144	17.5729	17.4362	17.8901	M1AV73	Nucleic acid binding protein
17.6532	18.1707	18.181	18.1871	17.3009	17.9965	18.4373	18.3899	17.248	17.8662	17.568	18.158	17.7144	17.5729	17.4362	17.8901	M1AV74	Nucleic acid binding protein
11.8441	11.938	12.0533	11.639	11.0709	11.4188	12.0545	11.6588	11.4645	11.4482	11.4366	11.8725	11.583	11.8116	11.5326	11.9688	M1AVG4	Homeodomain
13.7011	14.1569	14.2564	14.3391	13.2265	13.8818	14.1379	14.123	10.2484	13.7093	13.4297	13.8396	13.0777	13.4368	8.92479	13.5089	M1AVJ2	Fructose-bisphosphate aldolase
12.8074	12.7914	13.046	12.7762	10.689	12.9603	13.0994	13.1254	10.1261	10.326	12.5442	12.8718	12.9977	10.9015	12.0461	12.4925	M1AVJ2	Fructose-bisphosphate aldolase
17.2419	17.5622	17.7276	17.7091	16.886	17.5909	17.9916	17.7775	17.1108	17.5786	17.4046	17.6914	17.5451	17.6995	17.3874	17.7468	M1AVW2	Serine/threonine protein kinase
15.196	16.2567	16.2746	15.9763	15.4713	15.8908	16.3925	16.2628	14.973	16.4247	16.1458	16.2224	14.2707	15.8331	14.1443	15.914	M1AVW2	Serine/threonine protein kinase
14.6355	15.0058	15.1038	14.8194	14.4409	14.9975	15.7632	15.267	13.9234	14.2984	14.2408	14.5767	14.1314	14.339	13.8233	14.4143	M1AVW2	Serine/threonine protein kinase
13.3247	13.8519	13.9329	13.4258	12.9268	13.6154	14.1952	14.107	13.578	13.9631	13.9595	14.1802	13.4547	13.8733	13.4184	13.8717	M1AVW2	Serine/threonine protein kinase
13.4848	13.6692	13.754	13.8125	13.4353	13.9525	14.0662	13.991	12.7904	13.1181	12.9958	13.2132	13.4965	13.5421	13.314	13.6414	M1AVW2	Serine/threonine protein kinase
11.8173	12.0486	11.6042	10.188	11.9626	9.94355	11.515	11.8583	10.0847	12.8827	10.8411	11.0078	12.3708	12.9356	12.2712	12.46	M1AVW2	Serine/threonine protein kinase
15.713	16.125	16.2452	16.1945	15.6913	15.6323	16.203	15.7425	15.7468	16.4023	16.2858	16.4282	15.8533	15.7689	15.6703	15.7266	M1AVY9	Kinesin light chain
11.3264	11.9839	11.7687	11.5881	10.7821	11.9988	11.6199	11.3032	11.819	12.1572	12.17	11.5732	11.391	11.9833	11.2033	10.9712	M1AVY9	Kinesin light chain
19.0033	19.3444	19.4129	19.4679	19.1029	19.43	19.6568	19.5803	19.2947	19.6627	19.4008	19.6209	19.4159	19.6036	19.4368	19.5307	M1AW83	Beta-adaptin-like protein
14.6793	15.0542	15.2917	15.0462	14.8566	15.3804	15.4638	15.4141	14.994	15.1527	14.8797	15.3353	15.5173	15.628	15.5942	15.7157	M1AW88	Zinc finger family protein
17.1802	17.505	17.6953	17.6267	17.1937	17.8099	18.0942	17.895	16.8165	17.0309	16.9322	17.2579	17.5598	17.5911	17.3059	17.5297	M1AWG8	YS1
13.3487	13.6948	13.6666	13.7359	13.5473	14.0428	14.1041	14.1264	12.8949	13.4458	13.3605	13.6316	12.7802	12.7055	12.7899	12.9111	M1AWJ8	Transcription factor
13.3487	13.6948	13.6666	13.7359	13.5473	14.0428	14.1041	14.1264	12.8949	13.4458	13.3605	13.6316	12.7802	12.7055	12.7899	12.9111	M1AWK0	Transcription factor
10.2882	10.0679	10.5137	10.0345	10.9691	10.1057	10.4238	9.89075	13.1617	13.3747	13.3441	13.0593	10.9678	9.77675	10.8008	13.1091	M1AWK5	Protein ABIL2
10.9045	10.7286	10.1085	9.5545	10.1678	10.0612	9.82789	11.0558	13.1617	13.3747	13.3441	13.0593	11.598	10.789	11.6863	13.1091	M1AWK6	Protein ABIL2
11.9633	12.6499	12.4522	12.3715	12.293	12.7171	12.8042	12.7868	12.3609	12.5713	12.4593	12.8494	11.9222	12.3973	12.1996	12.4235	M1AWK5	Protein ABIL2
11.9633	12.6499	12.4522	12.3715	12.293	12.7171	12.8042	12.7868	12.3609	12.5713	12.4593	12.8494	11.9222	12.3973	12.1996	12.4235	M1AWK6	Protein ABIL2
19.34	19.5963	19.7522	19.6504	18.8661	19.3962	19.4763	19.5322	19.1408	19.4283	19.1791	19.5187	19.2323	19.313	19.2302	19.3364	M1AWL3	Electron transporter
14.2086	10.2382	14.8354	10.4077	13.8357	15.003	15.0386	15.2773	14.7674	15.2619	10.2914	10.7661	9.88637	15.5893	15.2852	15.6584	M1AWL3	Electron transporter
14.1361	14.2551	14.4221	13.9996	13.6911	11.1882	14.0063	14.0179	13.4645	14.2419	13.7142	13.4876	13.9662	14.262	13.8167	13.974	M1AWL3	Electron transporter
15.5654	15.9766	16.9761	15.7681	15.6406	15.9594	16.0639	16.8617	16.55	15.9792	16.0564	16.9957	16.1019	15.9498	15.9189	15.7415	M1AWL3	Electron transporter
15.1709	15.1201	11.0978	15.5041	14.9645	10.2775	15.7684	9.90933	10.643	15.801	15.6012	11.2481	15.5939	9.88919	15.5741	15.4815	M1AWL3	Electron transporter
14.7915	14.815	14.9093	11.2314	14.5525	9.52059	14.9221	14.8896	15.2245	15.3938	15.3031	15.6287	15.32	15.2433	15.1769	15.3704	M1AWN4	Eukaryotic translation initiation factor 3 subunit 10
14.7915	14.815	14.9093	10.0534	14.5525	11.2738	14.9221	14.8896	15.2245	15.3938	15.3031	15.6287	15.32	15.2433	15.1769	15.3704	M1AWN5	Eukaryotic translation initiation factor 3 subunit 10
10.0991	9.53947	11.1634	10.9214	9.46401	9.46683	10.4744	9.56554	9.40872	9.79882	9.87008	10.1541	10.829	9.41324	9.27843	9.41798	M1AWN4	Eukaryotic translation initiation factor 3 subunit 10
11.6641	9.53947	9.86099	9.65881	10.1067	9.46683	9.28273	10.1657	9.40872	9.79882	9.87008	10.1541	10.1733	9.41324	9.27843	9.41798	M1AWN5	Eukaryotic translation initiation factor 3 subunit 10
13.6565	14.0279	14.0802	13.8081	13.2983	13.7713	13.9979	13.9748	13.9786	14.2219	14.1809	14.3051	14.781	14.8692	14.6571	14.8605	M1AWS1	Centromeric protein E
15.7807	16.0629	16.3921	15.8888	16.183	16.4974	16.5078	10.8757	16.3711	16.5788	16.3582	16.5498	16.8528	17.0644	16.7416	16.8411	M1AWU2	Reticulon-like protein
11.1676	12.068	11.848	12.0588	10.2477	10.3445	11.8312	12.0561	16.6207	16.725	16.682	16.8638	17.0368	17.122	16.977	17.1046	M1AWU2	Reticulon-like protein
10.1303	10.2548	10.8582	10.045	9.35049	10.2165	11.0541	10.7905	14.8914	15.5722	15.2028	15.4904	15.1774	15.5502	15.2275	14.9939	M1AWU2	Reticulon-like protein
11.1699	10.9468	10.6866	10.0065	10.0573	9.3426	10.8399	10.3088	11.8615	11.8997	10.1563	11.0071	10.7171	12.0515	10.0361	10.8239	M1AWW8	BEL14 protein
9.5934	9.29575	9.88797	11.2137	9.60528	9.53191	10.7248	10.2554	11.8615	11.8997	10.0947	11.0071	10.0936	12.0515	10.7721	11.1606	M1AWW9	BEL14 protein
16.0415	16.0823	16.4157	16.3274	15.8815	16.5192	16.451	16.5428	16.0978	16.2059	16.2666	16.5441	16.2906	16.3017	16.189	16.3241	M1AWX7	CDK activating kinase
15.7459	16.067	16.0678	16.0393	15.9607	16.4857	15.7587	15.6322	15.4598	15.4817	15.7258	15.9118	15.9745	16.0043	15.861	16.0747	M1AWX7	CDK activating kinase
15.0807	15.2654	15.466	15.2755	14.8504	15.4608	15.2708	15.3184	15.2433	15.3228	15.3824	15.3553	15.3095	15.6537	15.342	15.1916	M1AWX7	CDK activating kinase
13.8417	14.0753	14.3029	14.0332	13.8473	14.119	14.2025	14.2807	14.4963	14.8356	14.7264	14.8528	15.274	15.2945	15.2937	15.3138	M1AWY0	Aquaporin PIP-type pTOM75
15.5788	16.051	15.8725	15.2726	15.1249	15.6651	15.8252	15.7852	16.2378	16.4801	16.2145	16.8617	16.6047	16.6012	16.4056	16.8095	M1AWZ2	Transcription factor S-II domain containing protein
11.079	11.0529	12.8722	10.0741	9.14677	12.6193	10.7972	12.6043	12.4806	12.8814	12.8686	13.7928	13.2313	10.9899	13.063	13.1579	M1AWZ2	Transcription factor S-II domain containing protein
13.1924	13.0212	12.7224	13.0122	13.9352	13.3006	13.0724	13.2123	13.3596	12.9231	12.9436	12.7529	13.1312	12.7657	12.835	12.9637	M1AX44	Malate dehydrogenase
11.5385	11.8872	12.1205	10.5135	11.5364	11.8158	12.2025	11.8657	11.9295	10.5252	11.9939	10.7834	12.3802	12.3044	10.827	10.8085	M1AXB3	Bromodomain-containing protein
12.3297	12.3406	13.2832	13.1497	12.859	12.2025	11.8316	10.4794	13.3176	14.6421	13.6006	14.2566	14.0112	14.6925	13.7972	15.1406	M1AXB5	Sodium/calcium exchanger family protein
15.2418	15.5144	15.6678	15.5484	14.1102	14.9138	15.3106	15.157	14.2405	14.8243	14.654	15.0104	14.8002	14.8516	14.5719	15.0344	M1AXC4	Uncharacterized protein
14.3913	14.6565	14.7169	14.5007	13.4182	14.0209	14.996	14.3553	13.0582	13.3474	13.3257	13.6454	13.6085	13.5916	13.2793	14.0193	M1AXC4	Uncharacterized protein
14.2473	14.5982	14.4658	14.5324	13.1885	13.9752	14.2726	14.0761	13.049	13.839	13.2621	13.711	13.6727	13.6427	13.6564	14.0061	M1AXC4	Uncharacterized protein
12.7785	13.4263	13.415	13.4549	13.0297	13.812	14.1597	14.1363	13.3272	13.7787	13.6615	13.9675	14.0916	14.2085	13.9487	14.361	M1AXD5	Proton pump interactor 1
12.9447	13.3632	9.39997	10.3212	9.28139	13.2488	9.60652	13.1869	13.0159	13.1986	10.8319	13.1627	9.92305	10.8277	10.9586	13.0563	M1AXD6	Cell division protein kinase
12.9447	13.3632	10.9057	10.9052	9.35609	13.2488	10.9857	13.1869	13.0159	13.1986	10.3356	13.1627	11.0655	10.0929	10.801	13.0563	M1AXD7	Cell division protein kinase
9.69332	10.8139	10.5751	9.05149	10.2954	10.5006	10.0983	11.2418	10.5065	10.413	10.8704	10.3385	10.4921	10.0962	10.0645	9.98592	M1AXD6	Cell division protein kinase
10.546	11.2438	10.5751	9.27907	10.2954	10.5006	10.0983	10.277	10.5065	10.413	10.8704	10.3385	10.4921	10.0962	10.0645	9.98592	M1AXD7	Cell division protein kinase
15.717	15.8809	15.9049	15.81	15.4695	15.8919	10.8505	16.0556	15.2967	15.4252	15.3431	15.6019	15.4311	15.5444	15.4495	15.6471	M1AXH1	Protein transport protein sec16
14.4556	14.7945	14.8323	14.6472	14.0246	14.5736	14.8254	14.732	14.1042	14.4472	14.2493	14.6162	14.1909	14.3251	14.0677	14.4035	M1AXH1	Protein transport protein sec16
14.4898	14.843	15.0168	14.7924	13.9535	14.4904	11.3947	14.8079	13.6229	13.903	13.9664	9.69414	11.5324	13.9465	13.7169	11.8545	M1AXH1	Protein transport protein sec16
15.1221	11.8688	11.5597	15.5968	14.8553	12.0053	9.76614	15.9883	12.12	15.6573	11.5259	11.0992	11.9923	15.8311	15.6026	15.8412	M1AXV1	Ubiquitin carboxyl-terminal hydrolase
14.3463	14.7574	14.9361	14.2025	14.7052	15.1441	16.2238	15.6323	14.3761	14.6912	14.6459	15.1251	15.5745	15.6425	15.2135	15.7941	M1AY13	Potassium transporter
18.3149	18.5832	18.9437	18.24	17.9521	18.4909	19.1243	19.0565	19.1113	19.7248	19.2035	19.4661	19.0519	19.4632	19.0655	19.517	M1AY18	Chlorophyll a-b binding protein, chloroplastic
16.4391	16.8217	16.6723	16.4213	16.1927	16.4355	16.4668	16.4439	16.4965	16.6231	16.4729	16.7226	16.2679	16.2994	16.2073	16.3622	M1AY74	Steroid nuclear receptor, ligand-binding
15.9442	16.4162	16.2786	14.7796	15.877	16.2266	16.277	16.4349	16.4983	16.2398	16.3531	16.5709	16.7522	16.709	16.6346	16.9062	M1AY74	Steroid nuclear receptor, ligand-binding
15.9442	16.4162	16.2786	14.7796	15.877	16.2266	16.277	16.4349	16.4983	16.2398	16.3531	16.5709	16.7522	16.709	16.6346	16.9062	M1AY74	Steroid nuclear receptor, ligand-binding
14.2403	14.3142	14.2174	14.0575	14.403	14.0769	14.2354	14.1219	14.252	14.3639	14.3611	10.4733	14.4934	14.5412	14.5072	14.5108	M1AY74	Steroid nuclear receptor, ligand-binding
15.5909	15.8418	15.9038	15.5999	15.1467	15.5001	15.8382	15.7202	15.6568	16.1996	15.8258	16.4668	15.4907	15.4876	15.2157	15.5435	M1AY74	Steroid nuclear receptor, ligand-binding
13.0198	13.3062	13.442	13.0203	12.3275	10.4438	13.4064	10.6057	12.3477	13.1496	12.7357	13.2704	11.1441	13.0978	12.8082	12.8885	M1AY74	Steroid nuclear receptor, ligand-binding
12.6208	13.0535	13.4036	12.8594	12.8723	13.5149	13.7502	13.5491	13.3238	13.7728	13.3845	13.7787	13.7829	13.987	13.9361	14.0335	M1AY92	Microtubule-associated protein futsch
15.0731	15.2731	15.4195	14.1111	14.7572	15.0453	9.81426	15.617	14.0186	15.1742	13.9186	15.2437	15.5863	15.7298	14.6704	15.6687	M1AYB5	TPX2 domain-containing protein
13.4943	9.77853	13.8897	13.8304	11.0377	13.4472	13.4604	10.5304	13.6117	13.9141	13.779	14.1485	13.6922	11.4068	13.6033	13.9494	M1AYB5	TPX2 domain-containing protein
13.5772	14.4615	14.0195	13.3636	13.4033	14.1565	13.864	14.2526	14.2094	14.4232	14.1877	14.4608	14.2968	14.5366	14.4712	14.4244	M1AYC9	Ran GTPase binding protein
13.3497	13.5725	10.276	13.313	13.5251	13.5364	13.743	13.7315	13.7626	13.9974	13.7159	13.9112	13.6032	13.5596	13.705	13.7448	M1AYG1	DNA topoisomerase IV subunit A
10.4403	13.3825	10.8661	10.1682	9.76491	9.76997	10.308	10.7286	10.5501	14.0111	11.3649	14.184	14.0528	14.066	13.8099	14.0596	M1AYL7	Nuclear pore protein
12.1711	12.5429	12.7948	10.7924	12.0397	12.5204	13.2709	12.9049	12.9181	13.0742	13.1425	14.0773	14.0766	13.6051	13.423	14.0104	M1AYS2	Uncharacterized protein
12.8058	10.8008	10.3473	9.48689	12.514	10.3514	13.0243	12.8696	11.3074	12.1701	9.97314	12.6505	10.5566	9.13509	11.3895	12.9684	M1AZB4	mRNA binding protein
16.3556	16.7059	16.7766	16.6358	16.28	16.7016	17.0546	16.8688	16.8686	17.0385	17.0269	17.42	17.2489	17.1925	17.0248	17.2195	M1AZM6	Prp4
16.3556	16.7059	16.7766	16.6358	16.28	16.7016	17.0546	16.8688	16.8686	17.0385	17.0269	17.42	17.2489	17.1925	17.0248	17.2195	M1AZM7	Prp4
10.762	13.9362	14.1214	14.087	13.799	14.2628	14.4575	14.5157	12.3268	11.2755	10.0318	14.362	10.6059	10.7731	14.425	14.6901	M1AZM6	Prp4
10.6836	13.9362	14.1214	14.087	13.799	14.2628	14.4575	14.5157	10.3423	10.8625	10.4205	14.362	11.2209	11.5737	14.425	14.6901	M1AZM7	Prp4
10.2789	11.3055	11.9625	11.7799	9.80362	9.77733	12.3501	11.7642	10.0243	9.87823	11.2629	10.517	10.7899	10.701	11.7865	10.2835	M1AZQ5	Pentatricopeptide repeat-containing protein
10.9	10.3362	11.9625	11.7799	9.5758	9.99414	12.3501	11.7642	10.2476	10.5705	11.2629	11.396	10.7899	10.701	11.6096	10.2835	M1AZQ6	Pentatricopeptide repeat-containing protein
11.9095	12.3279	12.6883	12.4669	12.2826	12.6189	12.74	12.631	12.2729	12.8379	12.6188	12.9241	12.8074	12.9688	12.5107	12.9549	M1AZR2	Guanine nucleotide-binding protein alpha-1 subunit
11.9095	12.3279	12.6883	12.4669	12.2826	12.6189	12.74	12.631	12.2729	12.8379	12.6188	12.9241	12.8074	12.9688	12.5107	12.9549	P93564	Guanine nucleotide-binding protein alpha-1 subunit
16.3809	16.7593	16.5878	16.5957	16.3558	16.7728	16.8147	16.8087	16.2836	16.4615	16.2032	16.427	16.7073	16.8531	16.7649	17.0724	M1AZT4	Mob1
16.3809	16.7593	16.5878	16.5957	16.3558	16.7728	16.8147	16.8087	16.2836	16.4615	16.2032	16.427	16.7073	16.8531	16.7649	17.0724	M1D1K7	Mob1
16.3809	16.7593	16.5878	16.5957	16.3558	16.7728	16.8147	16.8087	16.2836	16.4615	16.2032	16.427	16.7073	16.8531	16.7649	17.0724	M1D1K8	Mob1
18.3698	18.6435	18.9167	18.7662	18.459	19.0109	19.1535	19.1902	18.4756	18.755	18.6473	18.9408	18.9301	18.9878	18.8805	18.9473	M1AZW1	Calcium-transporting ATPase
18.3698	18.6435	18.9167	18.7662	18.459	19.0109	19.1535	19.1902	18.4756	18.755	18.6473	18.9408	18.9301	18.9878	18.8805	18.9473	M1BXI4	Calcium-transporting ATPase
18.3698	18.6435	18.9167	18.7662	18.459	19.0109	19.1535	19.1902	18.4756	18.755	18.6473	18.9408	18.9301	18.9878	18.8805	18.9473	M1BXT7	Calcium-transporting ATPase
18.3698	18.6435	18.9167	18.7662	18.459	19.0109	19.1535	19.1902	18.4756	18.755	18.6473	18.9408	18.9301	18.9878	18.8805	18.9473	M1BXT8	Calcium-transporting ATPase
16.6805	16.9368	16.9883	16.9504	16.5425	17.0136	17.2861	17.1196	16.8487	17.1387	16.9597	17.3283	17.3888	17.1448	17.0403	17.2062	M1B080	Serine/threonine-protein phosphatase
12.4352	12.4774	12.8685	12.4196	12.7124	10.3124	13.1898	13.1327	12.384	12.8571	11.533	12.6756	12.744	12.7937	12.6889	12.6174	M1B0A2	Cell division protein kinase
12.4352	12.4774	12.8685	12.4196	12.7124	10.6209	13.1898	13.1327	12.384	12.8571	9.87885	12.6756	12.744	12.7937	12.6889	12.6174	M1B0A3	Cell division protein kinase
18.0346	18.4906	18.6189	18.4224	17.6088	18.3814	18.6512	18.6017	17.755	18.2177	18.0238	18.3834	17.9663	18.1023	17.782	18.1269	M1B0B3	Uncharacterized protein
18.0346	18.4906	18.6189	18.4224	17.6088	18.3814	18.6512	18.6017	17.755	18.2177	18.0238	18.3834	17.9663	18.1023	17.782	18.1269	M1B0B4	Uncharacterized protein
12.5217	12.953	12.8854	13.3793	8.55829	13.2769	12.5578	13.2404	13.0772	13.2946	12.0702	12.1865	11.9481	13.2513	12.8175	13.1036	M1B0B3	Uncharacterized protein
12.5217	12.953	12.8854	13.3793	8.81042	13.2769	12.5578	13.2404	13.0772	13.2946	12.0702	12.1865	11.9481	13.2513	12.8175	13.1036	M1B0B4	Uncharacterized protein
10.0033	12.5699	12.6309	12.4508	11.8741	12.3571	12.711	12.3273	11.7674	12.3486	10.9245	12.4328	12.122	10.2618	11.1691	11.512	M1B0K2	ZF-HD homeobox protein
16.0739	16.2983	16.401	16.1343	16.0764	16.4819	16.6143	16.6502	16.4675	16.6051	16.4511	16.7932	16.7391	16.838	16.6684	16.8345	M1B123	Cdk10/11
14.6933	14.9146	15.038	14.9663	14.7962	15.2729	15.3245	15.3226	14.9675	15.3034	15.3048	15.198	15.4932	15.671	15.3516	15.5903	M1B123	Cdk10/11
21.115	21.5099	21.5481	21.4328	21.1045	21.6221	21.6591	21.8046	22.3778	22.8193	22.4425	22.6282	22.4489	22.7063	22.4703	22.5843	M1B144	Glutamate decarboxylase
10.5864	10.194	10.4951	10.8176	10.5418	10.6394	9.69213	11.5594	13.4674	13.8996	9.2394	10.268	10.9331	10.1484	9.20111	10.2297	M1B144	Glutamate decarboxylase
11.937	12.4801	12.6163	12.2608	11.826	12.5504	13.1353	13.0607	12.3199	12.5597	12.494	12.832	12.6057	13.0612	12.658	12.8583	M1B150	UTP--glucose-1-phosphate uridylyltransferase
11.8521	12.1242	12.1295	11.9292	11.4359	11.9554	12.8184	12.3865	11.5658	11.845	11.9241	12.2016	11.9143	12.0807	11.6004	12.1881	M1B150	UTP--glucose-1-phosphate uridylyltransferase
14.4824	14.8897	14.8024	14.0285	13.9239	15.2105	14.6361	15.1451	14.8391	15.0787	14.8253	15.2958	15.0627	15.3415	14.9987	15.3219	M1B153	Tyrosine-protein phosphatase
14.4824	14.8897	14.8024	14.0285	13.9239	15.2105	14.6361	15.1451	14.8391	15.0787	14.8253	15.2958	15.0627	15.3415	14.9987	15.3219	M1B154	Tyrosine-protein phosphatase
14.1419	14.5335	14.4569	14.1705	14.2561	14.63	14.7303	14.6948	13.8978	14.1072	13.9096	14.0974	14.0106	13.9165	13.89	14.1506	M1B165	Uncharacterized protein
13.9084	14.3198	14.4366	12.5641	13.4025	14.0271	14.26	14.2366	14.2709	14.0058	14.1639	14.9672	14.8994	14.8533	14.694	15.1525	M1B169	Transcription initiation factor IIF subunit alpha
13.9084	14.3198	14.4366	12.5641	13.4025	14.0271	14.26	14.2366	14.2709	14.0058	14.1639	14.9672	14.8994	14.8533	14.694	15.1525	M1B171	Transcription initiation factor IIF subunit alpha
9.7035	11.0906	11.5602	10.8213	9.64034	9.73232	10.6691	9.25894	11.7038	11.7207	11.5403	12.1119	11.4967	11.7698	11.3538	11.6401	M1B169	Transcription initiation factor IIF subunit alpha
9.7035	10.7058	11.5602	10.9235	9.64034	9.80419	10.0958	10.6107	11.7038	11.7207	11.5403	12.1119	11.4967	11.7698	11.3538	11.6401	M1B171	Transcription initiation factor IIF subunit alpha
18.5144	18.4394	18.8272	18.3701	18.0198	18.5136	18.6927	18.7042	18.3589	18.8807	18.631	18.6104	18.6618	18.8787	17.8109	18.1574	M1B1G7	Chlorophyll a-b binding protein, chloroplastic
9.88495	9.38013	10.974	14.1076	10.4176	14.0731	9.84069	9.59361	10.315	16.1911	15.9565	13.5702	10.9697	9.90084	11.5173	15.5388	M1B1G7	Chlorophyll a-b binding protein, chloroplastic
17.5302	17.7821	17.9456	17.7673	17.6345	18.0903	18.2295	18.2472	17.8341	18.1313	17.8921	18.1432	17.8363	17.9784	17.7542	17.9218	M1B1J1	Uncharacterized protein
9.17852	12.7512	10.9105	9.96316	10.9535	10.0062	10.8722	9.92487	10.3381	9.55347	10.4194	9.63479	10.2998	9.51518	12.1408	9.5965	M1B1J1	Uncharacterized protein
10.0356	12.197	12.4298	11.9665	12.3413	9.51697	12.3685	9.89833	9.44325	12.2181	10.1731	12.1788	13.0684	13.0028	13.0516	13.0154	M1B1T9	Pto-like serine/threonine kinase
14.0416	14.3094	14.3754	14.1327	13.57	14.107	14.069	14.1728	14.097	14.3469	14.1779	14.424	14.3167	14.2383	14.3025	14.3851	M1B1W6	ADP-ribosylation factor
14.0416	14.3094	14.3754	14.1327	13.57	14.107	14.069	14.1728	14.097	14.3469	14.1779	14.424	14.3167	14.2383	14.3025	14.3851	M1CEI4	ADP-ribosylation factor
14.0416	14.3094	14.3754	14.1327	13.57	14.107	14.069	14.1728	14.097	14.3469	14.1779	14.424	14.3167	14.2383	14.3025	14.3851	Q3HVM8	ADP-ribosylation factor
10.9734	10.9204	11.3915	10.2601	10.4921	10.9697	11.3116	11.5896	11.7713	12.083	12.2899	12.1469	11.6842	11.5223	11.4193	11.8792	M1B225	Thioredoxin-dependent peroxiredoxin
14.3711	14.7799	14.8194	14.8655	14.6202	15.1775	15.1902	15.1747	14.4921	14.7384	14.5462	14.6808	15.1406	15.0194	14.9139	15.0233	M1B233	RanBP2-type domain-containing protein
9.81689	12.7774	13.2576	9.50206	12.9367	13.0754	13.9168	13.2825	12.0003	11.3372	12.1912	12.6245	14.0111	13.3609	13.1441	13.6458	M1B2C0	RNA recognition motif-containing protein
16.4342	16.5994	16.7572	16.6354	16.2001	10.4687	16.6405	16.6468	16.7818	16.947	9.81247	17.1035	17.1201	17.1361	16.9886	17.1451	M1B2G6	MLO-like protein
16.4342	16.5994	16.7572	16.6354	16.2001	11.5528	16.6405	16.6468	16.7818	16.947	9.98617	17.1035	17.1201	17.1361	16.9886	17.1451	M1C4G3	MLO-like protein
11.1899	11.5067	9.8536	10.0739	10.7026	11.5159	11.3668	11.1647	12.6404	12.7195	12.4011	12.901	12.654	12.5189	12.4083	12.9399	M1B2J8	Methyl binding domain protein
10.3663	11.5067	10.7752	10.0739	10.7026	11.4921	11.3668	11.1647	12.6404	12.7195	12.4011	12.901	12.654	12.5189	12.4083	12.9399	M1B2K0	Methyl binding domain protein
13.2857	13.5136	13.8956	13.684	13.1353	10.3511	13.8626	10.2124	10.3257	13.266	9.96657	10.3948	13.4763	13.6579	13.3268	13.6731	M1B2P2	Kinase;Leucine-rich repeat family protein / protein kinase family protein;Protein kinase domain-containing protein;Protein kinase domain-containing protein;Protein kinase domain-containing protein
13.2857	13.5136	13.8956	13.684	13.1353	10.2055	13.8626	11.79	10.6355	13.266	10.536	10.7412	13.4763	13.6579	13.3268	13.6731	M1B8U6	Kinase;Leucine-rich repeat family protein / protein kinase family protein;Protein kinase domain-containing protein;Protein kinase domain-containing protein;Protein kinase domain-containing protein
13.2857	13.5136	13.8956	13.684	13.1353	10.5537	13.8626	10.6067	9.87531	13.266	9.99334	10.037	13.4763	13.6579	13.3268	13.6731	M1CSF9	Kinase;Leucine-rich repeat family protein / protein kinase family protein;Protein kinase domain-containing protein;Protein kinase domain-containing protein;Protein kinase domain-containing protein
13.2857	13.5136	13.8956	13.684	13.1353	10.2902	13.8626	9.8998	10.4621	13.266	9.99422	11.1964	13.4763	13.6579	13.3268	13.6731	M1CSG0	Kinase;Leucine-rich repeat family protein / protein kinase family protein;Protein kinase domain-containing protein;Protein kinase domain-containing protein;Protein kinase domain-containing protein
13.2857	13.5136	13.8956	13.684	13.1353	10.368	13.8626	10.7007	9.31828	13.266	10.2418	9.30872	13.4763	13.6579	13.3268	13.6731	M1CSG1	Kinase;Leucine-rich repeat family protein / protein kinase family protein;Protein kinase domain-containing protein;Protein kinase domain-containing protein;Protein kinase domain-containing protein
14.7378	14.9108	15.1105	14.8252	14.1583	14.9768	15.1813	15.0739	15.182	15.3943	14.3243	14.5656	14.5403	15.348	15.3307	15.4361	M1B2T1	Clathrin assembly protein
13.4365	8.96635	14.5172	13.2318	13.6464	14.3359	14.0385	10.2904	9.50358	11.4037	9.59911	14.4498	13.9813	13.7545	13.5101	10.2629	M1B2T1	Clathrin assembly protein
14.5225	15.0474	15.0917	14.2967	14.3981	15.177	15.2713	15.1833	14.3704	14.5429	14.7394	15.0726	14.9541	14.8565	14.8643	15.178	M1B2Z0	Potassium transporter
14.5225	15.0474	15.0917	14.2967	14.3981	15.177	15.2713	15.1833	14.3704	14.5429	14.7394	15.0726	14.9541	14.8565	14.8643	15.178	M1B2Z2	Potassium transporter
14.5225	15.0474	15.0917	14.2967	14.3981	15.177	15.2713	15.1833	14.3704	14.5429	14.7394	15.0726	14.9541	14.8565	14.8643	15.178	M1B2Z3	Potassium transporter
14.5225	15.0474	15.0917	14.2967	14.3981	15.177	15.2713	15.1833	14.3704	14.5429	14.7394	15.0726	14.9541	14.8565	14.8643	15.178	M1B2Z4	Potassium transporter
14.5225	15.0474	15.0917	14.2967	14.3981	15.177	15.2713	15.1833	14.3704	14.5429	14.7394	15.0726	14.9541	14.8565	14.8643	15.178	M1B2Z5	Potassium transporter
11.9106	12.7138	13.0386	10.755	11.7854	12.6492	12.854	12.9505	11.7388	11.2245	11.0295	12.1892	12.1292	11.6981	12.0019	12.6084	M1B3B9	Trichohyalin
14.1953	10.7436	14.447	14.4929	14.1163	14.4925	14.5283	14.4082	14.8366	15.0692	14.9366	15.1473	15.1106	15.1056	14.6915	15.2457	M1B3E8	Heat shock protein binding protein
16.0351	16.3212	16.5752	16.3935	15.5456	16.1846	16.1336	16.2106	16.2787	16.6047	16.5756	16.743	17.1657	17.1144	17.0716	17.2765	M1B3Z1	Uncharacterized protein
16.0351	16.3212	16.5752	16.3935	15.5456	16.1846	16.1336	16.2106	16.2787	16.6047	16.5756	16.743	17.1657	17.1144	17.0716	17.2765	M1B3Z2	Uncharacterized protein
14.3007	14.6565	14.5437	12.9621	13.2482	14.236	12.7111	14.1333	13.5158	13.9779	13.7869	14.0713	13.3069	13.4396	13.2065	11.5012	M1B3Z6	WD-repeat protein
9.57608	7.66286	14.4239	14.3409	9.45305	11.1362	10.8078	9.80826	14.5368	10.0812	14.5947	11.4764	15.4441	15.5472	15.2808	15.5434	M1B439	Membrane protein PB1A10.07c
10.3501	9.94843	14.4239	14.3409	10.316	10.7558	10.1761	10.4744	14.5368	8.41848	14.5947	10.9642	15.4441	15.5472	15.2808	15.5434	M1B441	Membrane protein PB1A10.07c
15.2564	15.6541	15.7104	15.6258	14.9595	15.4611	15.8202	15.6881	14.78	15.2609	15.0685	15.5028	15.0042	15.0557	15.0082	15.0699	M1B452	Respiratory burst oxidase homolog protein C
15.2564	15.6541	15.7104	15.6258	14.9595	15.4611	15.8202	15.6881	14.78	15.2609	15.0685	15.5028	15.0042	15.0557	15.0082	15.0699	Q2HXL0	Respiratory burst oxidase homolog protein C
13.3851	13.659	13.6702	13.7515	9.76305	13.8138	14.1163	13.9711	13.2728	13.7344	13.7483	13.7724	10.0172	13.9202	13.5264	14.0889	M1B452	Respiratory burst oxidase homolog protein C
13.3851	13.659	13.6702	13.7515	10.0487	13.8138	14.1163	13.9711	13.2728	13.7344	13.7483	13.7724	10.7599	13.9202	13.5264	14.0889	Q2HXL0	Respiratory burst oxidase homolog protein C
13.0806	13.3473	12.8393	10.2894	9.99508	10.8494	10.8841	12.1041	12.911	12.6144	13.1275	13.2241	10.4053	13.018	13.076	13.0217	M1B485	ATP binding protein
15.0528	15.28	15.6378	14.047	15.1324	15.3718	16.4996	16.4527	14.3337	10.6128	14.9051	15.0943	11.041	10.7273	14.1385	15.1692	M1B4H0	Ribonuclease
14.1066	14.7028	14.8706	13.6414	14.2465	14.8599	15.6705	15.4769	13.3674	13.6774	14.213	14.2134	13.9646	14.061	13.6963	14.5077	M1B4H0	Ribonuclease
10.8659	9.91857	10.7845	9.83724	10.8276	9.88028	10.7462	9.79895	15.3412	15.4512	15.1854	15.4617	15.415	15.4949	15.3303	15.4703	M1B4H5	Calnexin
18.099	17.9254	18.2821	18.0377	18.0244	18.1808	18.3131	18.285	18.5737	18.7111	18.5	18.9004	18.7992	18.7917	18.3225	18.5768	M1B4M9	Splicing factor
18.099	17.9254	18.2821	18.0377	18.0244	18.1808	18.3131	18.285	18.5737	18.7111	18.5	18.9004	18.7992	18.7917	18.3225	18.5768	M1B4M9	Splicing factor
18.099	17.9254	18.2821	18.0377	18.0244	18.1808	18.3131	18.285	18.5737	18.7111	18.5	18.9004	18.7992	18.7917	18.3225	18.5768	M1B4N0	Splicing factor
18.099	17.9254	18.2821	18.0377	18.0244	18.1808	18.3131	18.285	18.5737	18.7111	18.5	18.9004	18.7992	18.7917	18.3225	18.5768	M1B4N0	Splicing factor
18.099	17.9254	18.2821	18.0377	18.0244	18.1808	18.3131	18.285	18.5737	18.7111	18.5	18.9004	18.7992	18.7917	18.3225	18.5768	M1B4N1	Splicing factor
18.099	17.9254	18.2821	18.0377	18.0244	18.1808	18.3131	18.285	18.5737	18.7111	18.5	18.9004	18.7992	18.7917	18.3225	18.5768	M1B4N1	Splicing factor
18.099	17.9254	18.2821	18.0377	18.0244	18.1808	18.3131	18.285	18.5737	18.7111	18.5	18.9004	18.7992	18.7917	18.3225	18.5768	M1B4N2	Splicing factor
18.099	17.9254	18.2821	18.0377	18.0244	18.1808	18.3131	18.285	18.5737	18.7111	18.5	18.9004	18.7992	18.7917	18.3225	18.5768	M1B4N2	Splicing factor
18.0672	18.1841	18.4016	18.3856	17.847	18.3297	18.4926	18.5251	18.4479	18.5549	18.5762	18.8196	18.7665	18.7439	18.6333	18.8471	M1B4M9	Splicing factor
18.0672	18.1841	18.4016	18.3856	17.847	18.3297	18.4926	18.5251	18.4479	18.5549	18.5762	18.8196	18.7665	18.7439	18.6333	18.8471	M1B4N0	Splicing factor
18.0672	18.1841	18.4016	18.3856	17.847	18.3297	18.4926	18.5251	18.4479	18.5549	18.5762	18.8196	18.7665	18.7439	18.6333	18.8471	M1B4N1	Splicing factor
18.0672	18.1841	18.4016	18.3856	17.847	18.3297	18.4926	18.5251	18.4479	18.5549	18.5762	18.8196	18.7665	18.7439	18.6333	18.8471	M1B4N2	Splicing factor
14.2026	14.2962	14.6656	11.3805	14.2039	14.4023	14.6251	14.6455	15.0111	15.844	15.337	15.8899	15.76	15.9291	15.2451	15.7128	M1B4M9	Splicing factor
14.2026	14.2962	14.6656	11.3805	14.2039	14.4023	14.6251	14.6455	15.0111	15.844	15.337	15.8899	15.76	15.9291	15.2451	15.7128	M1B4M9	Splicing factor
14.2026	14.2962	14.6656	11.3805	14.2039	14.4023	14.6251	14.6455	15.0111	15.844	15.337	15.8899	15.76	15.9291	15.2451	15.7128	M1B4N0	Splicing factor
14.2026	14.2962	14.6656	11.3805	14.2039	14.4023	14.6251	14.6455	15.0111	15.844	15.337	15.8899	15.76	15.9291	15.2451	15.7128	M1B4N0	Splicing factor
14.2026	14.2962	14.6656	11.3805	14.2039	14.4023	14.6251	14.6455	15.0111	15.844	15.337	15.8899	15.76	15.9291	15.2451	15.7128	M1B4N1	Splicing factor
14.2026	14.2962	14.6656	11.3805	14.2039	14.4023	14.6251	14.6455	15.0111	15.844	15.337	15.8899	15.76	15.9291	15.2451	15.7128	M1B4N1	Splicing factor
14.2026	14.2962	14.6656	11.3805	14.2039	14.4023	14.6251	14.6455	15.0111	15.844	15.337	15.8899	15.76	15.9291	15.2451	15.7128	M1B4N2	Splicing factor
14.2026	14.2962	14.6656	11.3805	14.2039	14.4023	14.6251	14.6455	15.0111	15.844	15.337	15.8899	15.76	15.9291	15.2451	15.7128	M1B4N2	Splicing factor
12.442	12.8621	12.4035	11.7806	11.9911	12.7395	12.2752	11.7146	13.7343	13.6652	13.5577	14.433	14.0718	13.463	14.1239	13.9275	M1B4M9	Splicing factor
12.442	12.8621	12.4035	11.7806	11.9911	12.7395	12.2752	11.7146	13.7343	13.6652	13.5577	14.433	14.0718	13.463	14.1239	13.9275	M1B4N0	Splicing factor
12.442	12.8621	12.4035	11.7806	11.9911	12.7395	12.2752	11.7146	13.7343	13.6652	13.5577	14.433	14.0718	13.463	14.1239	13.9275	M1B4N1	Splicing factor
12.442	12.8621	12.4035	11.7806	11.9911	12.7395	12.2752	11.7146	13.7343	13.6652	13.5577	14.433	14.0718	13.463	14.1239	13.9275	M1B4N2	Splicing factor
16.7607	17.1135	17.1824	16.9703	16.5753	17.1104	17.4174	17.2799	16.8917	17.3309	17.1799	17.456	17.4085	17.4912	17.2539	17.5572	M1B4W9	Uncharacterized protein
13.3219	13.9415	13.5229	11.7958	13.1898	11.3676	13.2049	13.9121	14.4189	14.2339	14.2524	14.5053	14.5505	14.491	14.6464	14.9987	M1B4W9	Uncharacterized protein
11.0569	11.501	11.1817	10.4687	10.8224	11.2302	11.9862	11.389	9.91759	10.4735	8.88086	10.5436	10.1507	10.0981	9.74734	10.5594	M1B4X6	Steroid binding protein
17.7433	17.908	17.9444	17.7641	17.6561	18.2658	18.6639	18.4714	16.9563	17.4205	17.2507	17.3343	17.7679	17.9305	17.5152	17.8612	M1B524	Calcineurin B 02;Calcineurin B;Calcineurin B;Calcineurin B 02
17.7433	17.908	17.9444	17.7641	17.6561	18.2658	18.6639	18.4714	16.9563	17.4205	17.2507	17.3343	17.7679	17.9305	17.5152	17.8612	M1C0W1	Calcineurin B 02;Calcineurin B;Calcineurin B;Calcineurin B 02
17.7433	17.908	17.9444	17.7641	17.6561	18.2658	18.6639	18.4714	16.9563	17.4205	17.2507	17.3343	17.7679	17.9305	17.5152	17.8612	M1C0W2	Calcineurin B 02;Calcineurin B;Calcineurin B;Calcineurin B 02
17.7433	17.908	17.9444	17.7641	17.6561	18.2658	18.6639	18.4714	16.9563	17.4205	17.2507	17.3343	17.7679	17.9305	17.5152	17.8612	M1CX58	Calcineurin B 02;Calcineurin B;Calcineurin B;Calcineurin B 02
14.9259	15.2128	14.8732	15.0289	14.2269	14.753	14.9475	15.0009	14.6877	15.1679	14.8857	15.1078	14.4564	14.4523	14.2008	14.4063	M1B537	Heterogeneous nuclear ribonucleoprotein 27C
14.9259	15.2128	14.8732	15.0289	14.2269	14.753	14.9475	15.0009	14.6877	15.1679	14.8857	15.1078	14.4564	14.4523	14.2008	14.4063	M1B538	Heterogeneous nuclear ribonucleoprotein 27C
21.0551	21.2995	21.4038	21.3324	20.6028	21.2731	21.3685	21.3271	21.1718	21.4861	21.3233	21.6176	21.5099	21.539	21.4494	21.6642	M1B550	C2 NT-type domain-containing protein
17.3687	17.7482	17.7586	16.4045	16.4946	17.1958	17.4475	9.36997	16.7684	16.9492	16.9395	17.2116	17.2468	17.1645	17.0363	17.3569	M1B550	C2 NT-type domain-containing protein
17.3687	17.7482	17.7586	16.4045	16.4946	17.1958	17.4475	10.9106	16.7684	16.9492	16.9395	17.2116	17.2468	17.1645	17.0363	17.3569	M1B550	C2 NT-type domain-containing protein
16.101	16.2256	16.3729	16.2886	15.6364	15.9142	16.2154	16.0976	15.7475	16.1028	11.048	10.3372	16.1439	16.0792	15.8858	16.1298	M1B550	C2 NT-type domain-containing protein
19.987	20.2812	20.4431	20.3992	19.7135	20.535	20.5954	20.4906	20.0281	20.5485	20.3872	20.8247	20.2198	20.3035	20.0575	20.5611	M1B550	C2 NT-type domain-containing protein
16.3516	16.5644	9.77987	10.0186	16.0702	16.5921	10.4123	9.8398	10.9808	16.4008	16.3434	16.6758	11.2987	10.5513	16.5179	10.3378	M1B550	C2 NT-type domain-containing protein
8.82465	9.22032	16.6085	16.4221	10.0872	10.109	11.475	16.4315	10.2363	12.0915	9.07036	10.5027	16.5627	16.545	10.3714	16.6099	M1B550	C2 NT-type domain-containing protein
15.2423	15.7697	15.94	10.9351	10.8981	16.4359	15.6541	15.5551	15.859	15.3887	15.8281	16.0426	16.3583	16.5127	16.3121	16.4835	M1B550	C2 NT-type domain-containing protein
15.2141	15.7339	15.9236	9.58686	10.453	15.2882	9.3505	15.5169	15.8177	15.3556	15.7834	16.0205	16.33	16.498	16.2811	16.4677	M1B550	C2 NT-type domain-containing protein
17.7742	18.1174	18.275	18.0582	17.2569	17.9073	18.1215	17.9224	18.0778	18.3937	18.2633	18.6348	17.2448	18.4678	18.325	18.6009	M1B550	C2 NT-type domain-containing protein
16.8251	17.1864	17.2359	17.1677	16.743	17.4796	17.7696	17.5408	17.3151	17.7796	17.4786	17.9551	17.7245	17.8739	17.518	16.6334	M1B550	C2 NT-type domain-containing protein
10.363	16.053	16.6077	9.31473	10.5025	9.81015	16.4979	10.8137	17.6091	18.014	17.7821	18.1147	17.9721	17.978	10.2943	17.8971	M1B550	C2 NT-type domain-containing protein
12.5685	13.2784	13.4152	10.1315	12.6297	9.315	13.2635	13.3255	9.04048	12.3165	11.7896	12.658	13.1881	13.2049	12.9942	13.1934	M1B550	C2 NT-type domain-containing protein
13.0258	13.3859	13.7573	13.4376	12.6898	13.457	13.9687	13.6763	13.2976	13.8726	13.6336	14.2094	14.0569	14.0428	13.8036	14.194	M1B550	C2 NT-type domain-containing protein
10.7981	13.9945	14.6209	13.9989	10.7598	10.3343	10.1688	13.0042	13.1241	13.8091	13.6352	13.8022	13.6999	13.7475	13.6184	13.614	M1B550	C2 NT-type domain-containing protein
10.6617	9.71439	10.5804	9.63307	10.6234	9.6761	10.5421	9.59478	11.8711	10.8287	9.83153	10.4846	12.1175	11.2752	11.222	12.3702	M1B550	C2 NT-type domain-containing protein
10.6617	9.71439	10.5804	9.63307	10.6234	9.6761	10.5421	9.59478	11.8711	10.8287	9.83153	10.4846	12.1175	11.2752	11.222	12.3702	M1B550	C2 NT-type domain-containing protein
10.5515	16.1281	16.1695	16.0638	10.6293	15.9106	9.86823	16.1212	11.4729	16.0017	15.7721	10.4045	11.1861	11.0159	15.9492	16.168	M1B584	DNA-damage inducible protein ddi1
16.4284	16.87	16.9662	16.4806	16.315	16.8194	17.5613	17.1007	16.0853	16.4832	16.5138	16.6722	16.5423	16.1202	16.3439	16.8503	M1B592	K+ channel protein
10.1349	12.6172	10.3207	12.8089	12.3856	12.6674	12.7543	10.3175	10.4037	12.8368	12.8975	13.0345	10.9483	10.8585	9.24024	9.96262	M1B5B2	Potyviral helper component protease-interacting protein 2
13.4088	13.516	13.6808	13.6224	13.1336	13.3967	13.4608	13.5287	13.7941	13.9902	13.9645	14.1864	14.0884	13.9774	13.8039	13.9691	M1B5B5	Nuclear inhibitor of protein phosphatase-1
11.7358	11.8456	12.1572	9.92216	11.1165	11.6097	13.053	12.2889	12.0083	12.3057	12.3678	12.6849	12.7381	12.5687	12.4595	12.8532	M1B5C0	SUI1 domain-containing protein
10.5675	10.9265	10.9757	10.2924	10.6086	10.8798	11.4988	11.4147	10.5999	10.8983	10.3054	10.8936	10.8429	10.6554	10.1808	11.2729	M1B5I2	ATP-dependent Clp protease ATP-binding subunit clpA homolog CD4B, chloroplastic
13.6991	14.1991	14.1826	14.0742	13.0782	13.8979	10.3424	14.0625	13.1791	10.085	10.8012	11.3041	13.6765	13.4542	13.067	10.2896	M1B5M0	BZIP protein
10.7323	10.4701	10.9578	10.3716	10.5778	10.8251	10.851	10.9196	9.68015	10.0316	10.0005	9.8854	10.2185	10.8094	9.93149	10.7673	M1B5M0	BZIP protein
9.99007	10.4421	11.2171	9.25693	8.8673	11.1753	10.0921	9.89426	15.7818	15.9696	15.9829	15.6049	15.9994	10.2549	11.2123	15.5665	M1B605	Calmodulin-binding heat-shock protein
8.83836	9.97681	10.6602	9.0831	9.89038	9.7252	10.1432	10.7629	15.7818	15.9696	15.9829	15.6049	15.9994	10.0575	11.0948	15.5665	M1B608	Calmodulin-binding heat-shock protein
13.0667	13.6613	13.7788	14.1139	12.58	13.4569	13.6761	13.8828	13.2104	13.8696	13.7211	14.1068	13.9552	14.0534	13.9579	14.3492	M1B605	Calmodulin-binding heat-shock protein
13.0667	13.6613	13.7788	14.1139	12.58	13.4569	13.6761	13.8828	13.2104	13.8696	13.7211	14.1068	13.9552	14.0534	13.9579	14.3492	M1B608	Calmodulin-binding heat-shock protein
13.6684	14.2566	13.9567	14.1913	13.5053	14.2449	10.4103	14.1245	13.7937	11.8435	13.5809	13.8939	13.3223	13.6671	13.3155	13.4583	M1B693	ATSLY1
13.6684	14.2566	13.9567	14.1913	13.5053	14.2449	10.3038	14.1245	13.7937	9.43716	13.5809	13.8939	13.3223	13.6671	13.3155	13.4583	M1B694	ATSLY1
9.26964	13.3913	13.7056	10.7877	9.6432	9.97106	9.91041	10.6382	13.5921	13.7924	13.6547	14.0776	13.9063	11.3564	11.1024	13.982	M1B6B9	Ulp1 protease family, C-terminal catalytic domain containing protein;Ulp1 protease family, C-terminal catalytic domain containing protein
9.10511	13.3913	13.7056	9.6052	9.9285	10.0937	11.3452	10.9751	13.5921	13.7924	13.6547	14.0776	13.9063	11.4672	11.4857	13.982	M1B6C0	Ulp1 protease family, C-terminal catalytic domain containing protein;Ulp1 protease family, C-terminal catalytic domain containing protein
14.8031	15.0746	15.0898	10.0861	14.6034	14.8275	10.7534	15.0472	10.5214	11.0558	11.4806	10.3334	14.4924	14.5571	14.5868	10.4992	M1B6U1	Glycerol-3-phosphate transporter
15.2279	15.5677	15.355	15.0864	14.7778	14.8939	15.2158	15.241	14.4675	13.3906	14.3	14.3717	13.7554	14.2223	13.8383	14.0187	M1B6U1	Glycerol-3-phosphate transporter
14.3382	14.7235	14.4744	14.636	14.3434	14.5061	14.6155	13.9143	14.6693	14.7256	14.7429	14.7687	14.8533	14.9873	14.9075	14.9811	M1B717	Protein kinase domain-containing protein
14.3382	14.7235	14.4744	14.636	14.3434	14.5061	14.6155	13.9143	14.6693	14.7256	14.7429	14.7687	14.8533	14.9873	14.9075	14.9811	M1B718	Protein kinase domain-containing protein
12.9418	13.3792	13.5065	11.9801	13.0813	13.3534	13.5732	13.4148	13.5843	13.8032	13.7488	14.0158	14.2306	14.2462	14.0447	14.3214	M1B717	Protein kinase domain-containing protein
12.9418	13.3792	13.5065	11.9801	13.0813	13.3534	13.5732	13.4148	13.5843	13.8032	13.7488	14.0158	14.2306	14.2462	14.0447	14.3214	M1B717	Protein kinase domain-containing protein
12.9418	13.3792	13.5065	11.9801	13.0813	13.3534	13.5732	13.4148	13.5843	13.8032	13.7488	14.0158	14.2306	14.2462	14.0447	14.3214	M1B718	Protein kinase domain-containing protein
12.9418	13.3792	13.5065	11.9801	13.0813	13.3534	13.5732	13.4148	13.5843	13.8032	13.7488	14.0158	14.2306	14.2462	14.0447	14.3214	M1B718	Protein kinase domain-containing protein
9.45289	13.2987	18.6252	8.85085	18.3287	9.11736	18.9431	18.9373	13.7066	18.8633	18.6933	18.9942	13.8732	19.6541	14.816	19.4442	M1B7N4	PRA1 family protein
10.0333	16.4834	16.6884	16.0901	16.1747	10.3018	17.1112	17.0594	10.601	10.8019	16.5034	16.9533	17.3563	10.4035	17.0751	11.4818	M1B7N4	PRA1 family protein
12.3794	14.9772	14.2193	13.7718	14.9618	14.5053	15.1861	14.7256	15.5232	15.1347	9.87318	15.1457	16.5242	17.2575	15.9174	16.8969	M1B7N4	PRA1 family protein
13.9083	14.2497	14.3171	13.796	12.9229	13.8625	14.2638	13.9981	13.3232	13.7915	13.7493	14.0962	13.637	13.502	13.1456	13.7422	M1B7X1	Protein bem46
20.0532	20.3277	20.5233	20.3177	19.6021	20.2549	20.187	20.327	20.1456	19.9207	20.0444	20.3946	20.2381	20.1959	20.1046	20.2798	M1B7X8	Nodulation receptor kinase
16.6994	16.9867	17.0408	16.5572	16.7594	10.8128	16.5937	17.2927	16.9394	16.7921	16.7384	17.0302	16.799	17.0584	16.9134	17.1139	M1B7X8	Nodulation receptor kinase
15.1591	15.495	15.6262	15.4156	15.102	15.5364	15.6252	15.5879	15.065	14.8913	14.8045	14.9069	14.2867	9.93986	15.2445	15.2037	M1B7X8	Nodulation receptor kinase
9.84969	13.3427	13.336	10.3921	12.9058	13.2877	13.0574	13.1491	13.3156	10.2386	10.2756	12.7298	13.2536	13.3856	9.26625	13.4619	M1B7X8	Nodulation receptor kinase
12.5473	13.7509	13.0959	11.5316	11.972	13.0926	11.7827	12.7021	13.7724	12.5379	12.3616	11.0993	11.771	13.5804	13.7818	13.4342	M1B7X8	Nodulation receptor kinase
12.5473	13.7509	13.0959	11.5316	11.972	13.0926	11.7827	12.7021	13.7724	12.5379	12.3616	11.0993	11.771	13.5804	13.7818	13.4342	M1B7X8	Nodulation receptor kinase
15.2415	15.2553	15.3285	14.508	14.8807	15.2739	15.5443	15.5053	14.9934	15.1676	15.2128	15.6724	15.2505	15.0773	14.8118	15.2138	M1B7X8	Nodulation receptor kinase
15.1151	15.4904	11.6643	15.4798	15.0036	15.633	10.8681	10.8344	15.6479	9.85999	15.8622	16.1032	10.2241	9.83705	16.1156	16.2643	M1B891	AMP-activated protein kinase, gamma regulatory subunit;AMP-activated protein kinase, gamma regulatory subunit
15.1151	15.4904	8.66823	15.4798	15.0036	15.633	10.6345	10.3156	15.6479	9.63358	15.8622	16.1032	9.37243	11.4403	16.1156	16.2643	M1B892	AMP-activated protein kinase, gamma regulatory subunit;AMP-activated protein kinase, gamma regulatory subunit
14.1283	13.9654	14.3872	11.7696	14.0013	14.3489	14.6257	14.7431	13.8577	13.9566	14.0394	14.4019	14.8719	15.1926	14.605	15.2134	M1B8C1	Nodulin
14.1283	13.9654	14.3872	11.7696	14.0013	14.3489	14.6257	14.7431	13.8577	13.9566	14.0394	14.4019	14.8719	15.1926	14.605	15.2134	M1B8C1	Nodulin
14.1283	13.9654	14.3872	11.7696	14.0013	14.3489	14.6257	14.7431	13.8577	13.9566	14.0394	14.4019	14.8719	15.1926	14.605	15.2134	M1B8C2	Nodulin
14.1283	13.9654	14.3872	11.7696	14.0013	14.3489	14.6257	14.7431	13.8577	13.9566	14.0394	14.4019	14.8719	15.1926	14.605	15.2134	M1B8C2	Nodulin
12.6423	12.9969	13.2543	12.6696	12.6833	13.2355	13.4349	13.4213	12.1969	12.8818	12.2815	12.1235	13.0294	13.0734	13.0336	13.0819	M1B8C1	Nodulin
12.6423	12.9969	13.2543	12.6696	12.6833	13.2355	13.4349	13.4213	12.1969	12.8818	12.2815	12.1235	13.0294	13.0734	13.0336	13.0819	M1B8C2	Nodulin
10.0447	10.8617	10.7434	10.7266	10.8891	11.4897	9.44695	11.797	11.3866	9.8373	11.4454	12.2129	10.4869	12.2283	9.72024	11.9852	M1B8C1	Nodulin
10.1558	10.8617	8.89981	10.3746	9.83944	11.4897	11.0144	10.6651	11.3866	9.62461	11.4454	12.2129	9.50704	10.7538	10.196	10.9224	M1B8C2	Nodulin
14.6631	14.9348	15.4339	15.0546	14.5366	14.9373	10.7046	15.249	14.8327	15.5412	15.5628	15.2359	14.4915	14.562	14.2612	14.5696	M1B8C7	CBS domain containing protein
15.2592	15.6072	11.278	15.4775	14.1619	9.64388	11.3913	10.741	10.7764	10.259	10.1771	11.0848	15.3517	11.7098	9.6978	11.7813	M1B8D2	ATP-binding cassette transporter
9.69526	10.9923	12.3707	9.54166	9.32386	12.3065	12.4029	12.2334	12.3109	10.5289	12.4912	12.6664	12.2362	9.22443	10.6965	12.2329	M1B8L2	Multiprotein bridging factor 1b
11.7386	11.906	12.3053	11.166	11.0334	11.5187	13.2278	12.3262	11.0474	11.3937	11.5525	11.7193	11.336	10.8746	10.6402	11.5114	M1B8L2	Multiprotein bridging factor 1b
10.9576	8.3493	8.81058	7.04415	8.1196	9.74426	10.5311	9.26504	12.1931	12.4256	12.3281	12.8376	13.198	13.0495	12.8073	13.0653	M1B8S3	Bromodomain-containing protein
10.6939	11.3595	10.2098	11.6545	10.3733	11.632	10.2233	11.5262	10.9601	11.5933	9.65477	11.2526	12.1066	11.5371	10.8239	11.9588	M1B8V7	Serine/threonine-protein kinase PBS1
13.3804	14.3028	14.2674	13.2921	13.2203	13.9984	13.9988	14.1805	13.1706	13.3989	12.1767	13.8814	11.577	12.488	10.9348	10.3833	M1B927	Sugar transporter
13.3804	14.3028	14.2674	13.2921	13.2203	13.9984	13.9988	14.1805	13.1706	13.3989	12.1767	13.8814	10.3895	12.488	10.5743	9.51534	M1B928	Sugar transporter
9.65569	12.8842	10.2649	9.0575	9.13239	13.5952	10.5993	13.0349	12.9654	9.53902	12.0752	12.3497	12.4512	9.69344	9.9965	12.2929	M1B9C6	VIP2
9.53633	12.8842	10.2089	9.81249	9.58524	13.5952	10.7728	13.0349	12.9654	10.4253	12.0752	12.3497	12.4512	10.1921	10.686	12.2929	M1B9C7	VIP2
9.81238	12.8842	9.55091	10.3803	9.59456	13.5952	10.2556	13.0349	12.9654	10.2214	12.0752	12.3497	12.4512	10.6305	10.8017	12.2929	M1B9C8	VIP2
10.1621	9.43457	11.7362	10.8889	10.1279	10.8749	10.516	11.2697	11.0307	9.39452	9.39218	12.0196	12.0427	11.373	10.8104	12.1948	M1B9Q9	SAM domain-containing protein;SAM domain-containing protein;Uncharacterized protein;Uncharacterized protein
10.0442	9.97127	11.7362	10.8889	11.5461	10.1338	10.9786	9.77044	11.0307	10.7606	10.1649	12.0196	12.0427	11.373	10.8104	12.1948	M1B9R0	SAM domain-containing protein;SAM domain-containing protein;Uncharacterized protein;Uncharacterized protein
10.2599	9.5545	11.7362	10.8889	9.34974	10.4756	9.25511	10.813	11.0307	8.76107	10.352	12.0196	12.0427	11.373	10.8104	12.1948	M1B9R1	SAM domain-containing protein;SAM domain-containing protein;Uncharacterized protein;Uncharacterized protein
10.1203	9.5424	11.7362	10.8889	11.3412	11.2732	10.4115	10.5226	11.0307	9.82206	10.9693	12.0196	12.0427	11.373	10.8104	12.1948	M1B9R2	SAM domain-containing protein;SAM domain-containing protein;Uncharacterized protein;Uncharacterized protein
9.67451	10.1247	9.29301	11.3725	9.95774	11.0724	10.8285	10.8366	11.3493	11.3097	10.8501	10.7797	8.56184	11.422	11.1605	11.4247	M1B9Q9	SAM domain-containing protein;SAM domain-containing protein;Uncharacterized protein;Uncharacterized protein
9.97148	9.63717	9.29301	11.3725	10.2366	11.0724	10.2311	10.8366	11.0695	11.3097	10.0071	10.7797	8.56184	11.422	11.2031	11.4247	M1B9R0	SAM domain-containing protein;SAM domain-containing protein;Uncharacterized protein;Uncharacterized protein
9.28796	9.86585	9.29301	11.3725	8.81439	11.0724	9.96614	10.8366	11.4701	11.3097	10.3148	10.7797	8.56184	11.422	11.0526	11.4247	M1B9R1	SAM domain-containing protein;SAM domain-containing protein;Uncharacterized protein;Uncharacterized protein
11.2536	10.0154	9.29301	11.3725	10.5955	11.0724	11.42	10.8366	10.2066	11.3097	11.0242	10.7797	8.56184	11.422	10.2587	11.4247	M1B9R2	SAM domain-containing protein;SAM domain-containing protein;Uncharacterized protein;Uncharacterized protein
14.166	14.4733	14.4553	14.2213	14.2203	14.6263	14.7146	14.731	14.5197	14.7088	14.6365	14.9265	15.4671	15.3283	15.2926	15.491	M1B9S1	Class II knotted-like homeobox protein
14.166	14.4733	14.4553	14.2213	14.2203	14.6263	14.7146	14.731	14.5197	14.7088	14.6365	14.9265	15.4671	15.3283	15.2926	15.491	M1B9S2	Class II knotted-like homeobox protein
14.166	14.4733	14.4553	14.2213	14.2203	14.6263	14.7146	14.731	14.5197	14.7088	14.6365	14.9265	15.4671	15.3283	15.2926	15.491	M1B9S3	Class II knotted-like homeobox protein
15.2623	15.618	15.5632	14.8733	14.9743	15.5966	15.915	15.911	14.7898	15.0457	14.9897	15.3482	15.0855	15.157	15.0571	15.2241	M1BA40	Uncharacterized protein
13.2252	13.5387	13.7049	10.2076	12.7884	13.4836	13.6577	11.1574	13.4634	13.9217	13.6811	14.1307	13.8791	10.6533	13.6744	14.0192	M1BAK3	ATP binding protein
13.4388	13.61	13.4416	13.3967	12.9982	13.2303	13.2831	13.5583	12.8306	13.0992	13.0418	13.0565	11.6661	12.1543	11.7189	10.452	M1BAP7	TPX2 domain-containing protein
15.094	15.5452	15.7923	14.4611	15.6286	15.9435	16.0917	16.0997	15.5341	15.7173	15.6179	15.8947	15.6017	15.7747	15.492	15.5466	M1BAX0	Uncharacterized protein
16.4663	16.73	16.5635	15.9354	16.3201	16.6006	16.7705	16.8689	16.9481	16.8857	16.7914	17.1433	17.1071	17.0492	17.0524	17.3231	M1BB12	Red protein
23.0051	23.3871	23.5088	23.4373	22.959	23.3149	23.409	23.3308	23.4207	23.8033	23.5664	23.7191	24.2815	24.2906	24.1539	24.2755	M1BBH4	Patellin-3
20.919	21.337	21.3854	21.2661	20.6382	21.0492	21.4076	21.2477	21.4341	21.8774	21.6074	21.7131	21.9915	21.9826	21.8576	22.0699	M1BBH4	Patellin-3
15.4981	16.0035	16.1924	11.3818	15.229	15.6782	15.9998	15.8751	16.0215	16.4806	16.29	16.3115	16.7957	16.9519	16.7178	16.9228	M1BBH4	Patellin-3
13.8507	14.2756	14.4035	14.1631	13.8825	14.0604	14.1284	14.092	11.4225	12.0468	11.2583	11.6942	12.4954	11.7832	12.2176	12.2268	M1BBH4	Patellin-3
16.2364	15.0374	16.6116	16.6465	16.3516	16.8077	16.9554	16.9347	16.7573	15.7337	16.8981	17.1483	17.053	17.1758	16.8582	17.1206	M1BC39	Nucleic acid binding protein
14.1875	14.4367	14.8078	14.5378	10.8316	9.86282	14.9886	15.1145	10.2141	13.9969	14.054	14.3469	14.3439	14.4059	14.313	14.5973	M1BC39	Nucleic acid binding protein
11.7658	11.8382	11.5398	12.242	9.77765	10.4779	12.5821	12.3827	12.8609	13.1335	12.8174	13.2059	13.3602	11.0232	9.84744	9.94335	M1BC39	Nucleic acid binding protein
12.3642	12.893	13.2565	12.2455	12.055	12.6106	13.478	13.069	10.0531	11.4147	11.7233	12.0091	12.1718	12.3661	12.3037	12.4263	M1BCH1	H1flk
14.7039	15.0762	15.065	14.6313	14.6093	15.0395	15.5141	15.3805	14.8521	15.0824	15.0198	15.475	15.4897	15.4608	15.1073	15.4223	M1BCR8	Zinc finger CCCH domain-containing protein 32
14.7039	15.0762	15.065	14.6313	14.6093	15.0395	15.5141	15.3805	14.8521	15.0824	15.0198	15.475	15.4897	15.4608	15.1073	15.4223	M1BCR9	Zinc finger CCCH domain-containing protein 32
12.7642	12.9346	13.0129	11.225	12.2911	12.6856	13.462	13.4134	13.0879	13.325	13.3176	14.0142	13.1399	13.4053	13.0621	13.5229	M1BCR8	Zinc finger CCCH domain-containing protein 32
12.7642	12.9346	13.0129	11.225	12.2911	12.6856	13.462	13.4134	13.0879	13.325	13.3176	14.0142	13.1399	13.4053	13.0621	13.5229	M1BCR8	Zinc finger CCCH domain-containing protein 32
12.7642	12.9346	13.0129	11.225	12.2911	12.6856	13.462	13.4134	13.0879	13.325	13.3176	14.0142	13.1399	13.4053	13.0621	13.5229	M1BCR9	Zinc finger CCCH domain-containing protein 32
12.7642	12.9346	13.0129	11.225	12.2911	12.6856	13.462	13.4134	13.0879	13.325	13.3176	14.0142	13.1399	13.4053	13.0621	13.5229	M1BCR9	Zinc finger CCCH domain-containing protein 32
10.1378	10.192	12.6516	12.8662	12.1083	13.1482	12.455	13.4383	11.88	12.4374	12.2625	13.2161	13.0317	9.55665	12.3805	11.7019	M1BCR8	Zinc finger CCCH domain-containing protein 32
9.93719	9.69246	12.6516	12.8662	12.1083	13.1482	12.455	13.4383	11.88	12.4374	12.2625	13.2161	10.5973	10.282	12.3805	10.7423	M1BCR9	Zinc finger CCCH domain-containing protein 32
11.6662	9.66394	9.5726	8.28529	11.3319	11.4505	11.2041	11.7526	10.7016	11.7579	11.0981	9.48907	9.33523	11.6437	10.8001	11.2061	M1BCX7	Uncharacterized protein
13.4142	13.9403	13.8881	13.3644	12.5276	14.3062	14.457	14.2733	11.3888	12.5646	11.2013	13.0181	11.4778	10.555	12.251	10.55	M1BD10	Uncharacterized protein
15.2754	15.768	15.7052	8.85758	14.6343	15.349	15.7647	15.663	14.9926	15.2163	15.1756	15.878	15.4601	15.3392	15.0885	15.5183	M1BD90	Ran-binding protein
15.2754	15.768	15.7052	9.12597	14.6343	15.349	15.7647	15.663	14.9926	15.2163	15.1756	15.878	15.4601	15.3392	15.0885	15.5183	M1BD90	Ran-binding protein
15.5868	15.7069	15.8126	15.8525	15.1179	15.5159	15.6103	15.5382	15.3777	15.6848	15.5948	15.7948	15.2216	15.183	15.0833	15.2871	M1BDF0	Katanin p60 ATPase-containing subunit A1
13.2825	10.7497	11.1992	14.5965	10.3683	14.2984	13.6571	11.0688	11.624	14.8482	13.7315	15.4995	11.2817	13.5411	13.6186	13.678	M1BDG0	Uncharacterized protein
13.2825	10.7566	10.9657	14.5965	9.41004	14.2984	13.6571	11.0826	11.3469	14.8482	13.7315	15.4995	10.0613	13.5411	13.6186	13.678	M1BDG1	Uncharacterized protein
13.2825	11.289	10.2741	14.5965	9.49921	14.2984	13.6571	10.0871	10.0251	14.8482	13.7315	15.4995	10.4081	13.5411	13.6186	13.678	M1BDG2	Uncharacterized protein
13.6693	14.3353	14.3843	14.1576	13.928	14.5038	14.946	14.7628	14.2943	14.8714	14.6122	14.7735	16.1334	16.1578	15.8309	16.2008	M1BDL0	Stress enhanced protein 2
7.26043	10.1883	11.4472	11.2082	8.99126	10.1713	11.3613	11.1138	10.1744	11.0763	10.9816	12.7125	10.2001	12.0278	10.9967	12.4545	M1BDM6	MAC/Perforin domain containing protein
14.2274	14.5811	14.6521	14.3119	13.2871	13.8043	14.8123	14.5038	13.7946	14.2031	14.2325	14.54	13.2105	13.5708	13.1323	13.5512	M1BDU2	UDP-glucuronic acid/UDP-N-acetylgalactosamine transporter
14.2274	14.5811	14.6521	14.3119	13.2871	13.8043	14.8123	14.5038	13.7946	14.2031	14.2325	14.54	13.2105	13.5708	13.1323	13.5512	M1BDU3	UDP-glucuronic acid/UDP-N-acetylgalactosamine transporter
14.2274	14.5811	14.6521	14.3119	13.2871	13.8043	14.8123	14.5038	13.7946	14.2031	14.2325	14.54	13.2105	13.5708	13.1323	13.5512	M1BDU4	UDP-glucuronic acid/UDP-N-acetylgalactosamine transporter
14.9212	15.7607	14.8762	14.8776	9.1692	14.8988	10.9771	14.52	10.2925	14.7454	10.4018	14.502	14.9427	14.8036	14.872	10.4821	M1BDZ8	Chlorophyll a-b binding protein, chloroplastic
11.7443	11.9012	12.2175	11.9359	11.8225	11.8251	11.7516	12.0228	11.2307	11.2905	11.2834	11.0111	10.8382	11.8085	11.6256	11.6153	M1BE04	Protein-lysine N-methyltransferase 102587567;SLL2-S9-protein;Protein-lysine N-methyltransferase 102602202;SLL2-S9-protein
11.7443	11.9012	12.2175	11.9359	11.8225	11.8251	11.7516	12.0228	11.2307	11.2905	11.2834	11.0111	11.1995	11.8085	11.6256	11.6153	M1D0F6	Protein-lysine N-methyltransferase 102587567;SLL2-S9-protein;Protein-lysine N-methyltransferase 102602202;SLL2-S9-protein
11.7443	11.9012	12.2175	11.9359	11.8225	11.8251	11.7516	12.0228	11.2307	11.2905	11.2834	11.0111	10.6632	11.8085	11.6256	11.6153	M1D0F7	Protein-lysine N-methyltransferase 102587567;SLL2-S9-protein;Protein-lysine N-methyltransferase 102602202;SLL2-S9-protein
11.7443	11.9012	12.2175	11.9359	11.8225	11.8251	11.7516	12.0228	11.2307	11.2905	11.2834	11.0111	10.4544	11.8085	11.6256	11.6153	M1D0F8	Protein-lysine N-methyltransferase 102587567;SLL2-S9-protein;Protein-lysine N-methyltransferase 102602202;SLL2-S9-protein
16.8761	17.2773	17.6123	16.8559	16.4041	17.1178	17.3894	17.1931	17.5226	18.0962	17.7722	18.2466	18.5486	18.4982	18.1275	18.6924	M1BE45	Sucrose synthase
16.4026	16.6976	16.7713	16.5797	16.006	16.5017	16.4469	16.3564	16.7426	17.0627	16.843	17.1562	17.4846	17.3178	17.2558	17.3759	M1BE45	Sucrose synthase
11.7708	12.2589	12.7931	11.322	12.2263	11.2443	12.4539	12.7994	12.5454	13.0051	12.8267	13.1599	12.5724	12.8042	12.4994	12.6236	M1BE90	Double WRKY type transfactor
11.7708	12.2589	12.7931	11.322	12.2263	11.2443	12.4539	12.7994	12.5454	13.0051	12.8267	13.1599	12.5724	12.8042	12.4994	12.6236	M1BE91	Double WRKY type transfactor
11.7708	12.2589	12.7931	11.322	12.2263	11.2443	12.4539	12.7994	12.5454	13.0051	12.8267	13.1599	12.5724	12.8042	12.4994	12.6236	M1BE92	Double WRKY type transfactor
11.7708	12.2589	12.7931	11.322	12.2263	11.2443	12.4539	12.7994	12.5454	13.0051	12.8267	13.1599	12.5724	12.8042	12.4994	12.6236	M1BE93	Double WRKY type transfactor
14.5931	15.0155	10.3948	10.5702	9.83273	14.0784	9.26852	14.9077	14.7695	14.79	14.5622	15.7833	14.4347	14.9002	14.6662	15.9981	M1BEB1	IWS1 C-terminus family protein
14.5931	15.0155	9.68434	11.0258	9.87187	14.0784	9.95608	14.9077	14.7695	14.79	14.5622	15.7833	14.4347	14.9002	14.6662	15.9981	M1BEB1	IWS1 C-terminus family protein
13.9925	14.1227	14.2743	13.8325	13.6504	13.7841	14.2469	14.2869	13.6301	13.9431	13.6762	14.1513	13.3561	13.6542	13.5523	13.7525	M1BEB1	IWS1 C-terminus family protein
9.17778	10.0437	10.9097	10.2363	10.9528	10.0055	10.8714	9.92413	13.7626	9.55273	10.4187	9.63405	10.2991	13.7667	10.3804	14.0145	M1BEB1	IWS1 C-terminus family protein
13.8603	14.075	14.2158	14.0898	13.5202	14.2581	14.4049	14.2608	13.398	13.5628	13.667	13.9931	13.9166	13.8288	13.5916	13.9647	M1BEU8	Non-specific serine/threonine protein kinase
13.8603	14.075	14.2158	14.0898	13.5202	14.2581	14.4049	14.2608	13.398	13.5628	13.667	13.9931	13.9166	13.8288	13.5916	13.9647	M1BEU9	Non-specific serine/threonine protein kinase
13.8603	14.075	14.2158	14.0898	13.5202	14.2581	14.4049	14.2608	13.398	13.5628	13.667	13.9931	13.9166	13.8288	13.5916	13.9647	M1CM20	Non-specific serine/threonine protein kinase
17.1405	17.432	10.8032	17.493	16.9435	17.465	17.8461	17.6863	16.9777	14.0362	17.181	17.7709	17.2898	17.2738	17.1426	10.7003	M1BEY9	Uncharacterized protein
17.1405	17.432	10.0524	17.493	16.9435	17.465	17.8461	17.6863	16.9777	14.0362	17.181	17.7709	17.2898	17.2738	17.1426	11.3163	M1BEZ0	Uncharacterized protein
12.6995	13.0315	13.1216	12.7056	12.5558	13.3718	13.5064	13.4578	12.7873	9.9933	13.0761	13.5747	13.3991	13.4852	13.3998	13.4865	M1BF18	ATP synthase delta chain, chloroplastic
9.35084	16.1146	16.2375	10.6725	15.4347	16.0921	10.4785	10.0925	15.8591	16.2562	16.0617	16.3563	16.3198	16.4222	16.1192	16.3957	M1BFB1	Protein transporter
12.4864	12.8287	12.9194	12.8845	12.4276	13.1225	13.6707	13.2174	13.0365	13.3273	13.443	13.8271	14.0906	13.9969	13.5974	14.2106	M1BFB5	RAPTOR1B
12.4864	12.8287	12.9194	12.8845	12.4276	13.1225	13.6707	13.2174	13.0365	13.3273	13.443	13.8271	14.0906	13.9969	13.5974	14.2106	M1BFB6	RAPTOR1B
10.9878	10.9753	11.8657	11.0519	10.5735	11.5937	9.60717	9.80976	11.6413	12.1193	10.3989	12.4679	12.1284	12.1369	11.7923	12.323	M1BFB5	RAPTOR1B
10.9878	10.9753	11.8657	10.0562	10.5735	11.5937	10.3944	9.76764	11.6413	12.1193	10.6665	12.4679	12.1284	12.1369	11.7923	10.5959	M1BFB6	RAPTOR1B
14.0455	15.4468	14.1437	13.5038	14.0708	14.2898	14.2711	14.1275	14.7772	14.5702	14.8818	16.3299	15.0542	14.9212	14.8554	16.1467	M1BFD3	Splicing factor
14.0455	15.4468	14.1437	13.5038	14.0708	14.2898	14.2711	14.1275	14.7772	14.5702	14.8818	16.3299	15.0542	14.9212	14.8554	16.1467	M1BFD3	Splicing factor
14.0455	15.4468	14.1437	13.5038	14.0708	14.2898	14.2711	14.1275	14.7772	14.5702	14.8818	16.3299	15.0542	14.9212	14.8554	16.1467	M1BFD4	Splicing factor
14.0455	15.4468	14.1437	13.5038	14.0708	14.2898	14.2711	14.1275	14.7772	14.5702	14.8818	16.3299	15.0542	14.9212	14.8554	16.1467	M1BFD4	Splicing factor
14.0455	15.4468	14.1437	13.5038	14.0708	14.2898	14.2711	14.1275	14.7772	14.5702	14.8818	16.3299	15.0542	14.9212	14.8554	16.1467	M1BFD6	Splicing factor
14.0455	15.4468	14.1437	13.5038	14.0708	14.2898	14.2711	14.1275	14.7772	14.5702	14.8818	16.3299	15.0542	14.9212	14.8554	16.1467	M1BFD6	Splicing factor
14.0455	15.4468	14.1437	13.5038	14.0708	14.2898	14.2711	14.1275	14.7772	14.5702	14.8818	16.3299	15.0542	14.9212	14.8554	16.1467	M1BFD7	Splicing factor
14.0455	15.4468	14.1437	13.5038	14.0708	14.2898	14.2711	14.1275	14.7772	14.5702	14.8818	16.3299	15.0542	14.9212	14.8554	16.1467	M1BFD7	Splicing factor
11.2511	11.733	9.74779	11.744	11.3808	12.2469	11.8936	10.6908	11.8258	9.5378	10.9898	10.5607	12.0021	9.59839	11.6019	10.2803	M1BFD3	Splicing factor
11.2511	11.733	10.7014	11.744	11.3808	12.2469	11.8936	11.7633	10.4087	10.6926	10.7577	10.9921	12.0021	9.86564	11.6019	10.5343	M1BFD4	Splicing factor
11.2511	11.733	10.79	11.744	11.3808	12.2469	11.8936	10.0181	10.7185	10.7858	10.7849	10.4151	12.0021	10.4234	11.6019	10.7862	M1BFD6	Splicing factor
11.2511	11.733	10.1227	11.744	11.3808	12.2469	11.8936	10.5153	12.2776	10.6994	10.4179	10.5847	12.0021	11.1366	11.6019	11.5057	M1BFD7	Splicing factor
10.0525	10.1283	10.5082	10.8963	9.39927	11.3182	11.3718	8.6912	9.8023	10.4979	11.7815	9.54018	10.041	11.0322	10.6372	10.6657	M1BFD3	Splicing factor
10.7472	10.1283	10.2589	10.8963	9.39927	10.6393	10.7113	10.644	10.023	10.4979	10.8574	9.54018	10.041	11.0322	10.7217	10.6657	M1BFD3	Splicing factor
9.64456	10.1283	9.74684	10.8963	9.39927	10.5993	10.1309	10.9853	11.2915	10.4979	11.9806	9.54018	10.041	11.0322	11.0063	10.6657	M1BFD4	Splicing factor
10.1112	10.1283	10.5842	10.8963	9.39927	9.43763	10.3914	11.038	11.2343	10.4979	10.7686	9.54018	10.041	11.0322	11.0387	10.6657	M1BFD4	Splicing factor
10.4445	10.1283	9.93953	10.8963	9.39927	10.343	11.0405	10.3668	9.99228	10.4979	9.68046	9.54018	10.041	11.0322	10.3204	10.6657	M1BFD6	Splicing factor
9.69485	10.1283	8.67982	10.8963	9.39927	10.7201	11.648	10.808	10.5468	10.4979	10.525	9.54018	10.041	11.0322	10.2644	10.6657	M1BFD6	Splicing factor
10.5082	10.1283	10.7365	10.8963	9.39927	9.53093	10.8467	9.63822	10.5659	10.4979	9.5456	9.54018	10.041	11.0322	11.9744	10.6657	M1BFD7	Splicing factor
9.16401	10.1283	11.6074	10.8963	9.39927	9.93772	10.1036	10.3392	10.0916	10.4979	10.2558	9.54018	10.041	11.0322	10.7588	10.6657	M1BFD7	Splicing factor
10.2869	9.9733	10.5023	10.3209	9.46603	9.52955	10.4768	8.72664	11.1241	10.921	9.39762	11.2331	10.4608	10.9116	10.5361	10.8093	M1BFD3	Splicing factor
10.2869	9.9733	10.5023	10.3209	9.46603	9.52955	10.4768	8.72664	11.1241	10.921	9.39762	11.2331	10.4608	10.9116	10.5361	10.8093	M1BFD4	Splicing factor
10.2869	9.9733	10.5023	10.3209	9.46603	9.52955	10.4768	8.72664	11.1241	10.921	9.39762	11.2331	10.4608	10.9116	10.5361	10.8093	M1BFD6	Splicing factor
10.2869	9.9733	10.5023	10.3209	9.46603	9.52955	10.4768	8.72664	11.1241	10.921	9.39762	11.2331	10.4608	10.9116	10.5361	10.8093	M1BFD7	Splicing factor
14.0557	14.1964	12.4242	12.164	11.8131	9.2657	12.2842	12.0195	14.1381	14.7213	14.4267	14.6028	12.1899	14.2947	12.4647	14.4537	M1BFE7	Uncharacterized protein
11.8828	12.2309	12.2566	11.4782	12.0459	12.232	12.5042	12.2975	8.54974	9.20374	8.50324	11.7435	11.7956	11.8864	12.1356	9.58766	M1BFT9	Cryptochrome 2
11.8828	12.2309	12.2566	11.4782	12.0459	12.232	12.5042	12.2975	10.9878	10.9019	9.98905	11.7435	11.7956	11.8864	12.1356	10.7287	M1BFU0	Cryptochrome 2
15.5071	15.95	15.8925	15.828	15.213	15.7798	16.0504	15.8591	15.4922	15.889	15.7243	16.0851	15.2092	15.3842	15.0289	15.3526	M1BG14	COP1-interacting protein 7
14.4383	14.5095	14.6797	14.2701	10.2702	14.5327	15.103	14.5175	9.41123	14.6877	14.4575	14.8783	14.0137	12.5786	10.1455	14.1655	M1BG14	COP1-interacting protein 7
15.0435	14.9911	15.1885	15.1568	14.2882	14.8198	15.3137	15.1105	14.471	14.7289	14.5813	14.8223	13.7331	10.8086	10.3155	11.0394	M1BG14	COP1-interacting protein 7
12.9986	13.1218	13.2786	12.5222	12.0965	12.5452	13.7916	12.9678	12.6049	12.8496	12.9287	13.2552	12.2201	12.3111	11.7067	12.3211	M1BG14	COP1-interacting protein 7
10.853	11.4201	10.322	11.4505	10.9486	9.38761	10.3758	10.8855	14.271	10.3713	14.4243	14.7854	10.2183	10.348	10.2566	15.153	M1BGD9	AML1
10.9338	11.2764	10.7205	8.83565	9.06769	10.7508	11.1953	10.7861	14.271	11.3792	14.4243	14.7854	9.52601	11.1964	11.7482	15.153	M1BGE2	AML1
12.7769	13.0532	13.458	10.2809	10.0778	13.5321	14.1566	13.7087	13.0815	13.5745	13.5168	13.8292	13.8025	13.9258	13.6606	14.0762	M1BGD9	AML1
12.7769	13.0532	13.458	10.6764	9.47693	13.5321	14.1566	13.7087	13.0815	13.5745	13.5168	13.8292	13.8025	13.9258	13.6606	14.0762	M1BGE2	AML1
12.743	12.9458	12.816	12.8497	12.3762	12.8902	12.9383	12.8033	13.188	13.122	13.2347	13.3235	13.5251	13.0314	12.9975	13.1386	M1BGF6	Chloroplast protease
17.4516	17.6552	17.8066	17.6294	16.8776	17.4254	17.5551	17.4505	17.7627	18.1265	17.8033	18.1668	17.8261	17.809	17.7562	17.8067	M1BGN6	NOI
14.0149	14.5484	14.2778	8.4272	13.2606	10.6296	10.0853	11.1205	14.3231	10.62	14.5741	15.1003	14.6072	10.7181	14.6433	15.0675	M1BGP2	Uncharacterized protein
14.0149	14.5484	14.2778	11.0613	13.2606	9.74838	10.7039	9.93817	14.3231	11.1591	14.5741	15.1003	14.6072	10.4801	14.6433	15.0675	M1BGP4	Uncharacterized protein
14.9904	15.2908	15.331	15.1854	14.8482	15.2874	15.4082	15.4047	15.7259	15.963	15.6185	16.1753	15.8399	15.7798	15.6065	15.7696	M1BGT3	Heterogeneous nuclear ribonucleoprotein A1
14.9904	15.2908	15.331	15.1854	14.8482	15.2874	15.4082	15.4047	15.7259	15.963	15.6185	16.1753	15.8399	15.7798	15.6065	15.7696	M1BGT4	Heterogeneous nuclear ribonucleoprotein A1
16.6983	17.0009	17.1132	16.4094	16.1736	16.8164	16.9938	16.9629	16.9442	17.2359	17.1396	17.3543	17.2547	16.6949	17.0792	17.3185	M1BGW4	Ankyrin
15.9699	16.2955	16.5737	16.4807	16.1623	16.7971	16.8675	16.7535	16.5311	17.1851	16.5616	16.8385	16.9336	16.9504	16.6082	16.7206	M1BH19	Heterogeneous nuclear ribonucleoprotein
15.9699	16.2955	16.5737	16.4807	16.1623	16.7971	16.8675	16.7535	16.5311	17.1851	16.5616	16.8385	16.9336	16.9504	16.6082	16.7206	M1BH20	Heterogeneous nuclear ribonucleoprotein
10.5035	9.55619	14.8733	9.27446	10.4652	9.5179	10.3839	15.2342	9.84981	10.252	9.93114	10.9598	9.81152	10.8401	9.89284	10.9215	M1BH19	Heterogeneous nuclear ribonucleoprotein
10.5035	9.55619	14.8733	9.86246	10.4652	9.5179	10.3839	15.2342	9.84981	11.1914	9.93114	10.9598	9.81152	10.8401	9.89284	10.9215	M1BH20	Heterogeneous nuclear ribonucleoprotein
11.7012	10.37	12.4838	12.4208	12.0982	12.7811	13.0441	13.057	12.9161	13.1531	13.2626	13.8906	13.2612	13.5136	12.8195	13.7896	M1BH19	Heterogeneous nuclear ribonucleoprotein
11.7012	9.15111	12.4838	12.4208	12.0982	12.7811	13.0441	13.057	12.9161	13.1531	13.2626	13.8906	13.2612	13.5136	12.8195	13.7896	M1BH20	Heterogeneous nuclear ribonucleoprotein
9.39364	13.6376	14.0523	13.5352	10.0456	13.7572	11.0162	13.9022	11.1284	13.6901	13.7339	13.6675	10.7981	13.8549	10.4067	10.0892	M1BH65	Arf gtpase-activating protein
9.0423	13.6376	14.0523	13.5352	9.84451	13.7572	11.2007	13.9022	10.2559	13.6901	13.7339	13.6675	10.0384	13.8549	10.5171	10.7675	M1BH67	Arf gtpase-activating protein
11.9916	12.2051	12.5637	12.1449	11.8026	12.5005	13.0162	12.6854	12.1718	12.4185	12.4172	12.7212	14.3027	14.4576	14.1957	14.8509	M1BHA3	Uncharacterized protein
16.8611	17.1218	17.4725	17.2606	17.2273	17.6207	18.6067	18.0099	16.638	16.8564	16.9062	17.3655	17.1718	17.1913	16.7607	17.2579	M1BHB8	Alpha,alpha-trehalose-phosphate synthase [UDP-forming] 5
12.9304	13.3715	13.1596	13.2752	12.5977	13.0609	13.2698	13.5804	13.0334	13.5243	13.3035	12.9361	12.5003	13.1536	13.0801	13.1841	M1BHC8	Photosystem II 22 kDa protein, chloroplastic
15.3969	15.7961	15.9086	15.4992	15.2186	15.7874	16.4637	16.0918	14.3607	14.6334	14.7014	14.9629	15.4311	15.3615	15.0928	15.4398	M1BHF6	GONST5 Golgi Nucleotide sugar transporter
15.3969	15.7961	15.9086	15.4992	15.2186	15.7874	16.4637	16.0918	14.3607	14.6334	14.7014	14.9629	15.4311	15.3615	15.0928	15.4398	M1BHF7	GONST5 Golgi Nucleotide sugar transporter
12.1407	11.4797	12.619	11.3151	11.4297	12.6998	12.5876	12.6967	12.2589	12.3749	11.3128	11.0328	11.9461	10.9801	11.1489	12.0726	M1BHF6	GONST5 Golgi Nucleotide sugar transporter
12.1407	11.4797	12.619	11.3151	11.4297	12.6998	12.5876	12.6967	12.2589	12.3749	11.3128	11.0328	11.9461	10.9801	11.1489	12.0726	M1BHF7	GONST5 Golgi Nucleotide sugar transporter
8.57641	10.3437	11.3402	10.2745	11.2331	10.5154	11.6951	11.7851	11.076	11.9896	11.1216	11.7928	12.3972	12.6626	12.6559	12.6465	M1BHH6	Calmodulin binding protein
9.95916	10.6278	12.2802	10.5759	11.5584	10.6188	12.2061	11.9457	10.6672	12.181	12.1841	12.1936	12.7199	11.5832	12.6626	13.2531	M1BHI6	SCP domain-containing protein;Tho1_MOS11_C domain-containing protein
10.5667	10.6458	12.2802	10.2329	11.5584	10.8389	12.2061	11.9457	10.3837	12.181	12.1841	12.1936	12.7199	11.5832	12.6626	13.2531	M1BHI7	SCP domain-containing protein;Tho1_MOS11_C domain-containing protein
12.8602	13.3427	13.4381	11.1326	13.1782	13.609	13.7481	13.8214	13.7533	14.1269	14.0259	14.2392	14.3834	14.3761	14.3368	14.5087	M1BHM9	Uncharacterized protein
15.9453	16.2241	16.3592	16.0643	15.7314	16.2939	16.3869	16.3311	16.1926	16.4373	16.3638	16.4255	16.287	16.2892	16.1525	16.1063	M1BHY2	Uncharacterized protein
11.2587	10.8719	10.5871	10.248	11.2027	10.291	12.0658	11.6772	11.8448	10.3173	10.7043	12.4344	10.5847	12.5506	11.8298	12.633	M1BHY2	Uncharacterized protein
11.2587	10.3293	9.38203	8.97803	11.2027	10.2223	12.0658	11.6772	11.8448	9.8383	11.1065	12.4344	10.3703	12.5506	11.8298	12.633	M1BHY2	Uncharacterized protein
15.6326	11.5257	16.2129	11.5451	10.6185	11.5343	10.6378	11.5557	11.4926	17.1151	14.1453	10.5979	14.1194	16.9218	13.9935	10.5935	M1BI11	Serine/arginine rich splicing factor
16.2482	16.7475	16.8497	15.8499	16.8017	16.9049	17.1262	17.3085	16.647	16.6034	16.5924	16.772	16.9831	16.9474	16.8292	17.0634	M1BI11	Serine/arginine rich splicing factor
16.2482	16.7475	16.8497	15.8499	16.8017	16.9049	17.1262	17.3085	16.647	16.6034	16.5924	16.772	16.9831	16.9474	16.8292	17.0634	M1BI11	Serine/arginine rich splicing factor
13.5029	13.4539	13.3917	12.3364	12.7225	13.3506	13.6148	13.5292	13.986	13.9006	14.0955	14.6748	14.7163	14.2126	14.0359	14.756	M1BI99	Uncharacterized protein
13.2852	13.7642	13.694	13.5442	13.6261	13.8423	13.8804	13.8859	13.1996	13.8113	13.4768	13.9481	13.7187	13.721	13.251	13.7128	M1BIE4	RNA recognition motif-containing protein
13.6308	14.0843	14.0391	14.0069	13.3684	13.7474	14.2524	14.1248	13.1286	13.4478	13.3799	13.4845	13.4828	13.4959	13.2011	13.5219	M1BIH6	Inositol-tetrakisphosphate 1-kinase
12.3952	12.9986	13.0797	12.4654	12.4504	12.783	13.7948	13.1934	12.3799	12.4067	12.7764	12.8059	12.55	12.1263	12.2415	12.5029	M1BIK5	Uncharacterized protein
12.1141	12.6572	12.5232	11.3629	11.6911	12.3512	12.4943	12.6519	9.54685	10.5755	9.62817	10.6568	9.50856	10.5372	9.58988	7.1754	M1BJB9	U3 small nucleolar ribonucleoprotein protein MPP10
12.1141	12.6572	12.5232	11.3629	11.6911	12.3512	12.4943	12.6519	9.54685	10.5755	9.62817	10.6568	9.50856	10.5372	9.58988	7.1754	M1BJC0	U3 small nucleolar ribonucleoprotein protein MPP10
15.6705	15.8238	15.9361	15.8967	15.6539	16.2999	16.2574	16.271	15.4434	15.9938	15.8453	15.6792	15.8947	16.1898	15.9052	15.8782	M1BJF0	Leucine-rich repeat-containing protein
15.6705	15.8238	15.9361	15.8967	15.6539	16.2999	16.2574	16.271	15.4434	15.9938	15.8453	15.6792	15.8947	16.1898	15.9052	15.8782	M1BJF1	Leucine-rich repeat-containing protein
12.6739	12.8205	12.9156	12.1267	12.5257	12.8902	13.306	13.1367	13.0126	13.0431	13.1954	13.636	13.6134	13.6683	13.35	13.5443	M1BJJ0	Pantothenate kinase 2
12.6739	12.8205	12.9156	12.1267	12.5257	12.8902	13.306	13.1367	13.0126	13.0431	13.1954	13.636	13.6134	13.6683	13.35	13.5443	M1BJJ1	Pantothenate kinase 2
13.1783	13.3776	13.4327	12.9017	12.1512	12.6722	13.1636	12.8994	12.5969	12.6637	13.0128	13.1387	13.0921	13.158	12.8661	13.2053	M1BJK4	Uncharacterized protein
13.1783	13.3776	13.4327	12.9017	12.1512	12.6722	13.1636	12.8994	12.5969	12.6637	13.0128	13.1387	13.0921	13.158	12.8661	13.2053	M1BJK5	Uncharacterized protein
13.1783	13.3776	13.4327	12.9017	12.1512	12.6722	13.1636	12.8994	12.5969	12.6637	13.0128	13.1387	13.0921	13.158	12.8661	13.2053	M1BJK6	Uncharacterized protein
13.1783	13.3776	13.4327	12.9017	12.1512	12.6722	13.1636	12.8994	12.5969	12.6637	13.0128	13.1387	13.0921	13.158	12.8661	13.2053	M1BJK7	Uncharacterized protein
13.1783	13.3776	13.4327	12.9017	12.1512	12.6722	13.1636	12.8994	12.5969	12.6637	13.0128	13.1387	13.0921	13.158	12.8661	13.2053	M1BJK8	Uncharacterized protein
16.5411	16.793	16.9334	16.8408	16.6132	17.0237	17.0781	17.1453	16.7302	16.981	16.8094	17.0016	16.68	16.8368	16.7186	17.0257	M1BJL8	Protein MODIFIER OF SNC1 1
16.5806	16.6465	16.6699	16.7572	16.4841	16.6804	16.6506	16.6505	16.3456	16.4744	16.3758	16.3022	16.495	16.4546	16.4901	16.4235	M1BJL8	Protein MODIFIER OF SNC1 1
16.9694	17.2229	17.4886	8.95599	17.0219	17.2258	18.8514	17.9039	16.8872	17.168	17.6437	17.704	16.9841	17.2424	16.6601	10.2123	M1BJV5	Ferric-chelate reductase
16.8463	17.1469	17.2879	17.1839	16.8505	17.223	17.3766	17.313	17.0873	17.2587	17.2294	17.2562	17.0729	17.3058	17.163	16.9672	M1BJV5	Ferric-chelate reductase
13.0933	13.4311	13.4005	13.1673	13.1586	13.63	13.8326	13.885	14.6379	14.7562	14.7312	14.9371	15.0777	15.1785	15.0039	15.3225	M1BJV6	Eukaryotic translation initiation factor 3 subunit C
22.0935	22.4502	22.3527	22.1748	22.4996	22.2684	22.4707	22.4057	22.5929	22.8208	22.5936	22.5496	22.8881	22.8089	22.739	22.7531	M1BJX6	GRIP and coiled-coil domain-containing protein
12.4872	13.0546	12.5365	11.7981	12.5142	11.9802	12.2932	9.64683	12.8479	12.9964	13.332	12.8703	14.1079	13.8942	13.897	14.157	M1BJX6	GRIP and coiled-coil domain-containing protein
16.4616	16.8868	16.9892	16.4221	16.1052	16.6857	17.4271	16.944	17.0734	17.3779	17.4486	17.9417	17.9346	17.7898	17.4189	18.0335	M1BK18	Serine/threonine-protein kinase PBS1
15.1233	15.4158	15.5816	15.5403	15.0117	15.5861	15.677	15.5628	15.5418	15.9535	15.776	16.0515	16.1526	16.028	15.8286	16.0289	M1BK87	Protein phosphatase-2c
15.1233	15.4158	15.5816	15.5403	15.0117	15.5861	15.677	15.5628	15.5418	15.9535	15.776	16.0515	16.1526	16.028	15.8286	16.0289	M1BK88	Protein phosphatase-2c
15.1233	15.4158	15.5816	15.5403	15.0117	15.5861	15.677	15.5628	15.5418	15.9535	15.776	16.0515	16.1526	16.028	15.8286	16.0289	M1BK89	Protein phosphatase-2c
15.1233	15.4158	15.5816	15.5403	15.0117	15.5861	15.677	15.5628	15.5418	15.9535	15.776	16.0515	16.1526	16.028	15.8286	16.0289	M1BYL1	Protein phosphatase-2c
12.5523	12.8521	13.0433	12.8983	12.5867	13.1157	13.2912	13.3819	13.3122	13.6558	13.611	13.7795	14.0014	14.0275	13.7931	14.1222	M1BKB4	DNA-directed RNA polymerase
15.3932	15.704	15.8219	15.5826	15.0815	15.6253	16.2581	15.8494	15.8248	16.035	16.1741	16.5788	16.1718	16.1253	15.7999	16.2476	M1BKD1	1,3-beta-glucan synthase
13.2657	13.5171	13.4881	12.7994	13.1856	13.491	14.6374	14.0178	13.1505	13.3731	13.4872	13.6509	14.3282	14.3036	13.8486	14.2373	M1BKR6	Negatively light-regulated protein
13.2657	13.5171	13.4881	12.7994	13.1856	13.491	14.6374	14.0178	13.1505	13.3731	13.4872	13.6509	14.3282	14.3036	13.8486	14.2373	M1BKR7	Negatively light-regulated protein
13.486	13.6327	13.817	13.6233	12.4631	13.0037	13.781	13.2633	12.5429	11.4736	12.7538	12.9643	12.5182	12.6952	12.5969	12.7167	M1BKT9	Cinnamyl alcohol dehydrogenase
10.7487	10.5241	11.9666	10.0358	9.29019	10.8716	10.8249	11.3711	11.1365	10.1527	11.2434	11.7902	12.0863	12.378	11.6935	11.7142	M1BKU2	Actin
9.62147	10.2849	10.731	11.3498	10.137	10.2325	9.93265	16.5209	9.03671	15.7879	10.5956	15.8558	15.844	15.8504	10.4598	15.7042	M1BL78	Nucleic acid binding protein
11.1824	10.8164	9.29436	9.21167	10.9598	9.58639	11.3962	16.5209	10.4335	15.7879	10.556	15.8558	15.844	15.8504	11.6202	15.7042	M1BL79	Nucleic acid binding protein
12.5071	12.8403	12.8449	13.3498	12.5253	13.3346	13.4078	13.0943	10.796	12.7862	12.7292	13.2693	12.6328	13.0349	12.6558	13.1102	M1BL78	Nucleic acid binding protein
12.5071	12.8403	12.8449	13.3498	12.5253	13.3346	13.4078	13.0943	10.796	12.7862	12.7292	13.2693	12.6328	13.0349	12.6558	13.1102	M1BL78	Nucleic acid binding protein
12.5071	12.8403	12.8449	13.3498	12.5253	13.3346	13.4078	13.0943	10.796	12.7862	12.7292	13.2693	12.6328	13.0349	12.6558	13.1102	M1BL79	Nucleic acid binding protein
12.5071	12.8403	12.8449	13.3498	12.5253	13.3346	13.4078	13.0943	10.796	12.7862	12.7292	13.2693	12.6328	13.0349	12.6558	13.1102	M1BL79	Nucleic acid binding protein
13.1467	13.5019	13.6255	13.5481	12.7434	13.4138	13.6458	13.6621	13.281	13.8241	13.6711	14.1096	13.9161	13.7815	13.7069	14.0032	M1BLG9	Embryonic flower 1
15.2631	15.4751	15.7612	15.4864	15.1344	15.8614	15.9932	15.8583	15.1986	15.6335	15.4401	15.7071	15.6999	15.7249	15.5893	15.7169	M1BLI5	EIF4B
15.2631	15.4751	15.7612	15.4864	15.1344	15.8614	15.9932	15.8583	15.1986	15.6335	15.4401	15.7071	15.6999	15.7249	15.5893	15.7169	M1BLI6	EIF4B
13.9799	14.1195	14.4184	14.2326	14.0776	14.4315	14.4369	14.2845	13.776	14.0839	13.9384	14.1392	13.7926	13.7115	13.4486	13.5889	M1BLI5	EIF4B
13.9799	14.1195	14.4184	14.2326	14.0776	14.4315	14.4369	14.2845	13.776	14.0839	13.9384	14.1392	13.7926	13.7115	13.4486	13.5889	M1BLI6	EIF4B
14.326	14.954	14.7666	14.4757	13.98	14.731	14.4888	14.8461	15.4123	15.5135	15.3998	15.9418	15.8075	15.7764	15.4627	15.8558	M1BLK0	Signal transducer
9.24928	9.25142	11.1927	10.6477	9.494	10.6821	10.9858	9.37104	11.671	12.0875	12.094	12.1084	12.159	12.1329	11.6173	12.2688	M1BLK0	Signal transducer
17.2971	17.4851	17.7369	17.6527	17.305	17.813	17.8961	17.8266	17.8063	17.9227	17.991	18.2292	18.3867	18.2906	18.217	18.4079	M1BLT1	Uncharacterized protein
11.6672	10.0873	13.0179	10.174	9.89321	12.977	13.8429	13.3804	10.0254	10.0386	11.8199	11.5629	10.3413	11.5962	10.963	14.015	M1BLT1	Uncharacterized protein
11.8395	12.4719	12.1711	11.744	11.5725	12.2487	12.471	12.6722	11.3599	11.7647	11.3159	11.5464	11.4253	11.4365	9.58299	12.2554	M1BLV2	Sugar transporter
13.933	14.1763	15.163	14.1961	14.3164	13.9117	13.9206	14.8164	14.087	14.1342	14.0196	14.1205	15.1253	16.063	15.192	16.2899	M1BLV7	Amino acid transporter
13.6677	11.7694	14.0761	10.3935	8.86888	13.9873	14.3177	14.2779	14.8028	15.273	14.9391	15.1753	14.984	15.1771	14.8554	14.8621	M1BLV8	Heterogeneous nuclear ribonucleoprotein
13.6677	10.3623	14.0761	9.5151	9.84913	13.9873	14.3177	14.2779	14.8028	15.273	14.9391	15.1753	14.984	15.1771	14.8554	14.8621	M1BLV9	Heterogeneous nuclear ribonucleoprotein
13.2719	13.5527	13.84	10.2211	12.7957	13.391	14.0942	9.96205	10.4163	10.3565	13.181	11.6667	13.4266	13.4094	9.69677	10.1333	M1BM60	Protein kinase
13.2719	13.5527	13.84	7.91112	12.7957	13.391	14.0942	8.95372	10.2617	10.6313	13.181	10.0308	13.4266	13.4094	9.50499	11.4227	M1BM61	Protein kinase
12.7757	13.4631	13.7827	10.8578	9.23852	9.89427	13.9148	13.6911	9.46494	13.2327	9.64142	13.7018	10.8019	12.7843	10.4427	13.3795	M1BM60	Protein kinase
12.7757	13.4631	13.7827	9.7268	9.54113	10.3241	13.9148	13.6911	10.4108	13.2327	10.1524	13.7018	10.8019	12.7843	10.8372	13.3795	M1BM61	Protein kinase
16.1499	16.184	16.5586	16.5292	16.2147	16.2799	16.3615	16.421	16.6311	16.9663	16.7686	17.1832	17.1026	17.1087	16.9905	17.1284	M1BMM0	Arginine/serine-rich splicing factor
16.1499	16.184	16.5586	16.5292	16.2147	16.2799	16.3615	16.421	16.6311	16.9663	16.7686	17.1832	17.1026	17.1087	16.9905	17.1284	M1BMM1	Arginine/serine-rich splicing factor
15.0098	15.2212	15.6471	15.3352	15.3957	15.7538	15.8803	15.8439	15.7649	16.0999	15.8748	16.2872	16.2065	16.2397	16.0748	16.208	M1BMM0	Arginine/serine-rich splicing factor
15.0098	15.2212	15.6471	15.3352	15.3957	15.7538	15.8803	15.8439	15.7649	16.0999	15.8748	16.2872	16.2065	16.2397	16.0748	16.208	M1BMM1	Arginine/serine-rich splicing factor
14.1736	14.4816	14.4252	14.5102	14.3425	14.4547	14.6092	14.598	14.9181	15.1133	14.969	15.1601	15.3443	15.1758	15.0502	15.1349	M1BMM0	Arginine/serine-rich splicing factor
14.1736	14.4816	14.4252	14.5102	14.3425	14.4547	14.6092	14.598	14.9181	15.1133	14.969	15.1601	15.3443	15.1758	15.0502	15.1349	M1BMM1	Arginine/serine-rich splicing factor
12.7777	13.1493	13.4639	11.516	13.0707	13.4558	13.5652	13.6816	13.8321	13.7849	13.7655	14.2726	14.1619	14.4429	14.0572	14.1701	M1BMM0	Arginine/serine-rich splicing factor
12.7777	13.1493	13.4639	11.516	13.0707	13.4558	13.5652	13.6816	13.8321	13.7849	13.7655	14.2726	14.1619	14.4429	14.0572	14.1701	M1BMM0	Arginine/serine-rich splicing factor
12.7777	13.1493	13.4639	11.516	13.0707	13.4558	13.5652	13.6816	13.8321	13.7849	13.7655	14.2726	14.1619	14.4429	14.0572	14.1701	M1BMM1	Arginine/serine-rich splicing factor
12.7777	13.1493	13.4639	11.516	13.0707	13.4558	13.5652	13.6816	13.8321	13.7849	13.7655	14.2726	14.1619	14.4429	14.0572	14.1701	M1BMM1	Arginine/serine-rich splicing factor
10.3236	13.3655	13.4554	12.6447	12.4411	9.35404	10.2032	13.3257	12.9623	12.8367	9.05215	13.5531	11.1617	13.3494	10.2791	13.3737	M1BNH8	Ribulose bisphosphate carboxylase/oxygenase activase, chloroplastic
13.2756	13.5528	13.7111	13.4271	12.6841	13.1685	13.9818	13.5702	12.8383	13.1464	13.182	13.4596	13.2073	13.3335	13.0395	13.3336	M1BNH8	Ribulose bisphosphate carboxylase/oxygenase activase, chloroplastic
15.0305	15.2885	15.43	10.215	14.4211	9.62339	15.5139	15.3583	15.9034	16.3464	16.1766	16.4837	16.4672	16.4827	16.12	9.88388	M1BNL7	Phosphoinositide phospholipase C
10.0809	9.75153	13.4349	9.48734	10.6933	9.29189	13.4467	13.2169	13.6901	14.0466	13.8722	13.9002	13.9865	13.9863	13.9104	13.59	M1BNL7	Phosphoinositide phospholipase C
12.5298	12.4043	12.7683	11.7365	12.2153	12.6049	13.2435	12.9521	12.2791	12.7549	12.4164	13.0102	13.0273	12.9731	12.7346	13.2267	M1BNR5	ALY protein
12.5298	12.4043	12.7683	11.7365	12.2153	12.6049	13.2435	12.9521	12.2791	12.7549	12.4164	13.0102	13.0273	12.9731	12.7346	13.2267	M1BNR7	ALY protein
13.3173	10.8768	13.6244	9.53803	12.7916	10.3032	13.9577	13.6896	11.6955	10.2542	11.1274	10.6424	10.8156	10.932	8.89161	11.107	M1BNY3	Uncharacterized protein
8.67866	10.7544	10.9202	9.95999	10.9503	7.52382	11.1113	9.9217	9.68246	9.81044	12.2684	11.0755	9.91591	10.1497	9.3603	10.2882	M1BNZ4	Translational initiation factor eIF1
12.6878	12.9177	12.8584	12.1436	11.7349	12.4838	12.6548	12.6403	13.1306	13.3747	13.2571	12.7753	13.122	13.3338	12.2988	13.0721	M1BP14	60S ribosomal protein L8
12.6878	12.9177	12.8584	12.1436	11.7349	12.4838	12.6548	12.6403	13.1306	13.3747	13.2571	12.7753	13.122	13.3338	12.2988	13.0721	M1BZ12	60S ribosomal protein L8
19.5381	10.9743	14.9073	11.1069	9.29001	11.0898	14.198	17.2665	19.3897	13.653	18.0803	15.0504	11.4711	10.4357	15.4031	12.7658	M1BP29	Usp domain-containing protein
13.9464	14.2468	14.2524	13.1278	14.0865	14.0125	14.2725	14.313	14.4662	14.6373	14.338	14.6301	14.5203	14.6334	14.5291	14.4316	M1BPB3	Peptidylprolyl isomerase
13.871	14.1269	14.1881	12.8359	13.8677	13.8664	14.2074	14.1884	14.3833	14.6017	14.2523	14.5964	14.4383	14.5968	14.2942	14.3917	M1BPB3	Peptidylprolyl isomerase
13.9464	14.2468	14.2524	13.1278	14.0865	14.0125	14.2725	14.313	14.4662	14.6373	14.338	14.6301	14.5203	14.6334	14.5291	14.4316	M1BPB5	Peptidylprolyl isomerase
13.871	14.1269	14.1881	12.8359	13.8677	13.8664	14.2074	14.1884	14.3833	14.6017	14.2523	14.5964	14.4383	14.5968	14.2942	14.3917	M1BPB5	Peptidylprolyl isomerase
9.65068	10.598	9.73201	9.53372	11.2574	9.42471	10.3156	11.144	10.7351	10.0539	9.56899	9.91538	10.734	9.46925	11.7945	10.4786	M1BPB3	Peptidylprolyl isomerase
9.65068	10.598	9.73201	9.65692	11.2574	10.1352	10.6096	9.72895	10.034	9.77229	10.0172	10.7619	8.99347	11.3054	11.7945	12.1562	M1BPB5	Peptidylprolyl isomerase
11.1041	11.2269	11.2494	11.4112	10.5352	11.3651	11.2579	11.4957	11.5037	11.7436	10.8279	11.3571	11.1553	11.603	11.7512	11.9661	M1BPB3	Peptidylprolyl isomerase
11.1041	11.2269	11.2494	11.4112	10.5352	11.3651	11.2579	11.4957	11.5037	11.7436	10.8279	11.3571	11.1553	11.603	11.7512	11.9661	M1BPB5	Peptidylprolyl isomerase
10.2704	15.375	15.3751	15.2404	9.76973	15.4925	15.9164	15.7876	14.5593	14.9495	14.7382	10.7492	15.078	15.1503	14.9567	15.0955	M1BPE8	Ribosome-recycling factor, chloroplastic
9.45533	10.1163	13.1267	12.8192	12.955	12.9624	13.2523	13.1811	13.2259	13.477	13.1578	13.5279	13.3689	13.3895	13.1011	13.5469	M1BPM7	ATP binding protein
11.5451	11.9058	11.9093	9.10153	9.95604	11.2809	12.9698	12.0174	9.79677	10.6736	8.90704	9.72831	10.2394	10.6355	9.67504	11.279	M1BPP1	Calcium ion binding protein
11.5451	11.9058	11.9093	10.204	9.70679	11.2809	12.9698	12.0174	9.79677	10.9817	8.90704	11.4146	10.2394	10.6355	9.34892	11.279	M1BPP2	Calcium ion binding protein
14.6762	14.8936	14.7476	14.7767	14.0581	14.4982	14.6558	14.5814	14.2246	14.4934	14.3421	14.6108	13.9225	13.9519	13.9687	14.2157	M1BPR8	BZIP transcription factor
14.6762	14.8936	14.7476	14.7767	14.0581	14.4982	14.6558	14.5814	14.2246	14.4934	14.3421	14.6108	13.9225	13.9519	13.9687	14.2157	M1BPR9	BZIP transcription factor
12.2522	12.5372	12.4639	12.6017	11.6246	11.8226	12.4577	12.1569	13.0575	13.4098	13.386	13.4429	14.2523	14.5995	14.1907	14.5639	M1BPZ2	Chlorophyll a-b binding protein, chloroplastic
11.449	12.1366	12.0216	11.927	11.6628	11.961	12.518	12.2027	10.9241	12.0739	11.8222	12.2373	11.9814	12.1042	12.1145	12.2132	M1BPZ4	Geranylgeranyl reductase
13.5188	13.6945	14.1711	13.8445	13.5191	14.0026	14.1792	14.0234	13.6927	14.3845	13.8853	14.1304	14.1432	14.1071	13.9828	14.0903	M1BQD5	Coiled-coil domain-containing protein
13.1478	13.9574	12.3259	12.2307	13.5212	13.4236	13.9259	13.7175	13.9314	14.2467	14.0124	14.1393	14.1969	14.2149	14.0451	14.063	M1BQD5	Coiled-coil domain-containing protein
13.1478	13.9574	12.3259	12.2307	13.5212	13.4236	13.9259	13.7175	13.9314	14.2467	14.0124	14.1393	14.1969	14.2149	14.0451	14.063	M1BQD5	Coiled-coil domain-containing protein
13.4728	13.9979	13.9254	13.5182	12.461	13.2178	13.9339	13.2999	13.4919	13.869	13.8788	13.9807	14.3507	14.0998	14.0113	14.5645	M1BQF9	Methyl binding domain protein MBD109
13.059	13.711	13.4471	12.9557	12.3301	12.9545	13.35	13.1867	12.7271	13.4676	13.2033	13.5936	13.5171	13.453	13.2833	13.6797	M1BQF9	Methyl binding domain protein MBD109
15.171	15.4915	10.1609	11.0684	15.3157	15.8535	11.0643	16.2544	15.5391	16.0482	10.7316	16.1738	11.5674	15.7773	10.3122	10.4988	M1BQQ6	Uncharacterized protein
12.6894	12.8577	13.0281	13.0284	12.7047	13.5202	13.474	13.5392	13.7443	13.9613	13.6826	13.7226	13.3084	13.6453	13.0925	12.8193	M1BQQ6	Uncharacterized protein
11.2012	11.493	10.1604	9.96711	11.8341	11.5514	13.0528	9.66826	11.8682	11.8846	11.1978	12.4091	10.4784	12.4391	11.9691	12.507	M1BQR5	26S proteasome subunit RPN5b
11.2012	11.493	8.83004	8.89425	11.8341	11.5514	13.0528	9.9552	11.8682	11.8846	9.4714	12.4091	9.95761	12.4391	11.9691	12.507	M1BQR7	26S proteasome subunit RPN5b
11.2012	11.493	11.5184	9.59355	11.8341	11.5514	13.0528	10.259	11.8682	11.8846	10.3484	12.4091	10.1998	12.4391	11.9691	12.507	M1C6F6	26S proteasome subunit RPN5b
14.7778	15.3895	15.0385	14.0012	14.4909	15.0927	15.4093	15.4798	14.8015	15.0217	14.7427	15.2127	14.9253	15.3055	15.0769	15.2836	M1BRH0	LisH domain-containing protein
15.0682	15.3795	15.4622	15.397	14.6443	15.3807	15.5304	15.4861	14.9529	15.2396	9.97457	11.1042	14.5298	14.6685	15.0322	14.665	M1BRQ6	Myosin heavy chain, clone
18.0709	18.1503	18.1581	18.1356	18.0387	18.4787	18.6675	18.6148	17.8044	18.0191	17.9079	18.1548	18.0042	18.0729	17.8016	18.1384	M1BS76	RPM1 interacting protein 4 transcript 2
15.1624	15.3422	15.6912	15.713	15.2053	15.5374	15.9936	16.0804	15.342	15.6983	15.0184	15.7668	15.3621	15.3816	15.2587	15.4185	M1BS76	RPM1 interacting protein 4 transcript 2
14.7885	15.0324	15.0751	14.6609	14.7414	14.6266	15.4401	14.8996	13.3641	13.8931	10.5169	10.6635	11.6518	11.6939	13.3104	10.585	M1BS76	RPM1 interacting protein 4 transcript 2
13.8496	14.0526	10.356	10.2111	14.0441	14.231	14.3237	14.4714	14.0379	13.8408	13.9407	14.2137	14.4021	10.5002	14.1278	14.3515	M1BSN2	Phosphoglycerate mutase
13.8496	14.0526	10.1773	9.95813	14.0441	14.231	14.3237	14.4714	14.0379	13.8408	13.9407	14.2137	14.4021	10.0832	14.1278	14.3515	M1BSN3	Phosphoglycerate mutase
17.0107	17.2633	17.2663	17.1009	16.5226	16.9518	17.1754	17.1265	16.9043	17.2594	16.977	17.0783	17.0534	17.293	17.0429	17.2682	M1BSR0	Nodulin family protein
14.9005	15.2331	15.2327	15.2757	10.6825	14.7077	15.0982	10.6763	14.9027	15.2701	15.1067	15.3792	15.4893	15.5856	10.2853	15.6793	M1BSR5	CLC-Nt2 protein
14.8354	15.3849	15.2299	15.5436	14.8426	15.4497	15.8376	15.6017	15.4215	11.7314	9.99353	11.0077	9.74946	10.4583	15.7667	10.8711	M1BSV4	Acetyl-CoA synthetase
16.1543	16.4977	16.5374	9.82708	16.0836	10.8738	9.36962	16.7104	15.8451	10.6358	10.1232	9.81503	10.7218	10.4605	10.7227	12.0877	M1BSX4	Uncharacterized protein
16.1543	16.4977	16.5374	10.1612	16.0836	9.95793	10.8806	16.7104	15.8451	11.7004	10.4085	10.058	10.5935	11.3432	10.5235	10.3708	M1BSX5	Uncharacterized protein
16.1543	16.4977	16.5374	9.54903	16.0836	8.71654	10.2354	16.7104	15.8451	9.89226	9.96459	10.207	11.0683	10.2037	11.4074	9.84789	M1BSX6	Uncharacterized protein
12.0763	12.694	10.5769	9.8417	12.6481	13.0328	10.9899	10.7819	13.0264	13.3705	13.0425	10.8495	13.5479	13.7497	13.462	14.0157	M1BSX4	Uncharacterized protein
12.0763	12.694	10.6176	9.40176	12.6481	13.0328	10.8813	9.91618	13.0264	13.3705	13.0425	10.2163	13.5479	13.7497	13.462	14.0157	M1BSX5	Uncharacterized protein
12.0763	12.694	9.88504	9.3318	12.6481	13.0328	11.061	10.0064	13.0264	13.3705	13.0425	11.0239	13.5479	13.7497	13.462	14.0157	M1BSX6	Uncharacterized protein
9.35692	12.8635	13.0554	12.8363	10.9697	13.1964	13.3269	13.2779	12.6662	13.0452	9.47399	13.2698	13.3828	13.1682	13.0725	13.4078	M1BSX4	Uncharacterized protein
9.88993	12.8635	13.0554	12.8363	10.5632	13.1964	13.3269	13.2779	12.6662	13.0452	11.5574	13.2698	13.3828	13.1682	13.0725	13.4078	M1BSX5	Uncharacterized protein
9.95065	12.8635	13.0554	12.8363	11.1414	13.1964	13.3269	13.2779	12.6662	13.0452	10.6985	13.2698	13.3828	13.1682	13.0725	13.4078	M1BSX6	Uncharacterized protein
12.3668	12.9115	12.9725	12.9908	12.8027	13.5404	12.9953	13.5136	12.5033	13.0511	12.5501	12.5852	12.6151	12.8759	12.8902	12.8196	M1BSX4	Uncharacterized protein
12.3668	12.9115	12.9725	12.9908	12.8027	13.5404	12.9953	13.5136	12.5033	13.0511	12.5501	12.5852	12.6151	12.8759	12.8902	12.8196	M1BSX5	Uncharacterized protein
12.3668	12.9115	12.9725	12.9908	12.8027	13.5404	12.9953	13.5136	12.5033	13.0511	12.5501	12.5852	12.6151	12.8759	12.8902	12.8196	M1BSX6	Uncharacterized protein
16.2299	16.5868	16.6883	16.2603	15.0803	15.3786	16.4916	16.1682	16.3585	16.8402	16.6815	17.1372	16.808	17.0688	16.3546	17.0122	M1BSY1	S-acyltransferase
12.3263	12.4226	12.7086	10.9085	11.4644	12.5515	13.1714	12.668	12.5751	12.8083	12.9383	13.3566	13.353	12.7909	12.6025	13.3017	M1BSY1	S-acyltransferase
12.7	13.255	13.4923	10.539	8.21157	10.5868	13.8012	9.16018	12.4599	12.8287	10.8903	11.3433	9.90687	13.4276	10.5538	10.7869	M1BT43	MLO-like protein
11.038	13.141	13.1088	10.5847	10.1312	13.2604	14.1112	13.5517	12.3063	12.473	9.59717	10.7796	10.891	12.6276	9.67728	10.5795	M1BT63	Auxilin
15.4851	15.6852	15.9663	15.6674	15.5618	16.0306	16.1762	16.1971	15.4886	15.6509	15.5002	16.0035	15.5755	10.2564	15.4793	15.6821	M1BTH7	Integrin-linked protein kinase
15.4851	15.6852	15.9663	15.6674	15.5618	16.0306	16.1762	16.1971	15.4886	15.6509	15.5002	16.0035	15.5755	9.74842	15.4793	15.6821	M1BTH8	Integrin-linked protein kinase
15.4851	15.6852	15.9663	15.6674	15.5618	16.0306	16.1762	16.1971	15.4886	15.6509	15.5002	16.0035	15.5755	12.2648	15.4793	15.6821	M1BTH9	Integrin-linked protein kinase
15.4851	15.6852	15.9663	15.6674	15.5618	16.0306	16.1762	16.1971	15.4886	15.6509	15.5002	16.0035	15.5755	10.5987	15.4793	15.6821	M1BTI0	Integrin-linked protein kinase
15.4851	15.6852	15.9663	15.6674	15.5618	16.0306	16.1762	16.1971	15.4886	15.6509	15.5002	16.0035	15.5755	10.261	15.4793	15.6821	M1BTI1	Integrin-linked protein kinase
15.0361	15.2912	15.4922	15.1515	9.00954	15.6037	15.5848	15.6961	15.129	15.2519	15.3286	15.7053	15.5854	15.6482	15.4123	15.6067	M1BTH7	Integrin-linked protein kinase
15.0361	15.2912	15.4922	15.1515	10.3708	15.6037	15.5848	15.6961	15.129	15.2519	15.3286	15.7053	15.5854	15.6482	15.4123	15.6067	M1BTH8	Integrin-linked protein kinase
15.0361	15.2912	15.4922	15.1515	10.1758	15.6037	15.5848	15.6961	15.129	15.2519	15.3286	15.7053	15.5854	15.6482	15.4123	15.6067	M1BTH9	Integrin-linked protein kinase
15.0361	15.2912	15.4922	15.1515	11.2033	15.6037	15.5848	15.6961	15.129	15.2519	15.3286	15.7053	15.5854	15.6482	15.4123	15.6067	M1BTI0	Integrin-linked protein kinase
15.0361	15.2912	15.4922	15.1515	10.1185	15.6037	15.5848	15.6961	15.129	15.2519	15.3286	15.7053	15.5854	15.6482	15.4123	15.6067	M1BTI1	Integrin-linked protein kinase
14.1132	14.4864	14.5278	14.3899	13.6066	14.4484	14.8926	14.5781	14.1972	14.6548	14.7563	15.0181	14.6391	14.6607	14.2495	14.8433	M1BTH7	Integrin-linked protein kinase
14.1132	14.4864	14.5278	14.3899	13.6066	14.4484	14.8926	14.5781	14.1972	14.6548	14.7563	15.0181	14.6391	14.6607	14.2495	14.8433	M1BTH8	Integrin-linked protein kinase
14.1132	14.4864	14.5278	14.3899	13.6066	14.4484	14.8926	14.5781	14.1972	14.6548	14.7563	15.0181	14.6391	14.6607	14.2495	14.8433	M1BTH9	Integrin-linked protein kinase
14.1132	14.4864	14.5278	14.3899	13.6066	14.4484	14.8926	14.5781	14.1972	14.6548	14.7563	15.0181	14.6391	14.6607	14.2495	14.8433	M1BTI0	Integrin-linked protein kinase
14.1132	14.4864	14.5278	14.3899	13.6066	14.4484	14.8926	14.5781	14.1972	14.6548	14.7563	15.0181	14.6391	14.6607	14.2495	14.8433	M1BTI1	Integrin-linked protein kinase
13.57	14.6924	11.0046	13.5744	12.9914	13.9128	14.3724	14.0826	13.6421	14.6959	14.7045	14.7227	14.4733	14.3781	14.7089	13.6039	M1BTK3	Potassium transporter
14.8926	15.0626	14.9977	15.0106	14.5003	15.0932	15.0696	14.9598	14.7956	15.0978	14.9189	15.151	15.2742	15.2619	15.2005	15.4563	M1BTL7	Ankyrin repeat-containing protein
16.2511	16.5237	16.2627	16.2865	15.8958	16.387	16.467	16.4879	16.4896	16.8115	16.5508	17.1062	17.81	17.9009	17.5893	17.9939	M1BTN7	Phosphoenolpyruvate carboxylase
12.2557	12.1762	12.4658	12.126	12.195	12.662	10.9636	12.8215	11.856	12.15	12.0384	12.3943	12.4421	12.5284	12.3883	12.6863	M1BTW9	ATP synthase subunit b', chloroplastic;ATP synthase subunit b', chloroplastic
12.2557	12.1762	12.4658	12.126	12.195	12.662	11.6292	12.8215	11.856	12.15	12.0384	12.3943	12.4421	12.5284	12.3883	12.6863	M1BTY8	ATP synthase subunit b', chloroplastic;ATP synthase subunit b', chloroplastic
16.907	17.1831	17.4151	17.1922	16.8824	17.3436	17.4955	17.5177	17.2028	17.785	17.5254	17.5672	17.4296	17.7156	17.2509	17.615	M1BU30	Glycine cleavage system H protein
10.9272	8.57559	9.76218	7.19579	10.8889	9.9416	8.37642	9.3926	10.3454	10.5922	10.495	11.3899	10.648	10.95	10.2949	10.7845	M1BU32	Protein phosphatase 2C 29
10.9272	8.57559	9.76218	7.19579	10.8889	9.9416	8.37642	9.3926	10.3454	10.5922	10.495	11.3899	10.648	10.95	10.2949	10.7845	M1BU33	Protein phosphatase 2C 29
15.5188	15.7988	15.7479	15.3419	15.2765	15.4761	15.6449	15.5139	15.5244	15.6733	15.2942	9.27976	9.73759	15.477	15.2637	15.5196	M1BU42	Protein-serine/threonine phosphatase
15.5188	15.7988	15.7479	15.3419	15.2765	15.4761	15.6449	15.5139	15.5244	15.6733	15.2942	10.1272	11.3684	15.477	15.2637	15.5196	M1BU43	Protein-serine/threonine phosphatase
15.5188	15.7988	15.7479	15.3419	15.2765	15.4761	15.6449	15.5139	15.5244	15.6733	15.2942	11.0053	11.2271	15.477	15.2637	15.5196	M1BU44	Protein-serine/threonine phosphatase
16.9059	17.298	17.3463	17.1291	16.9706	17.4069	17.6203	17.4403	17.0436	17.2174	17.1387	17.4532	17.3718	17.4735	17.2178	17.4638	M1BUP0	Uncharacterized protein
14.3463	14.8318	14.9189	14.6467	14.5478	15.0885	15.4343	15.277	14.4461	14.9923	14.7688	15.1221	15.0748	15.0773	14.642	15.0953	M1BUP0	Uncharacterized protein
11.2871	11.8893	12.1219	11.4738	9.57661	12.1779	11.4094	12.1263	11.5275	11.2035	11.7504	12.0816	11.7576	11.87	11.6831	12.1046	M1BUX2	Squamous cell carcinoma antigen recognized by T-cells
15.1241	15.4648	15.4207	14.7474	14.8906	14.4263	15.1649	15.4782	16.2582	16.4999	16.1905	16.7397	16.7557	16.842	16.6884	16.9736	M1BV53	Transcription factor HY5
15.1241	15.4648	15.4207	14.7474	14.8906	14.4263	15.1649	15.4782	16.2582	16.4999	16.1905	16.7397	16.7557	16.842	16.6884	16.9736	M1BV55	Transcription factor HY5
15.1241	15.4648	15.4207	14.7474	14.8906	14.4263	15.1649	15.4782	16.2582	16.4999	16.1905	16.7397	16.7557	16.842	16.6884	16.9736	M1BV56	Transcription factor HY5
13.4282	13.6113	13.8875	13.0905	13.6004	13.9018	13.6872	13.9866	13.5598	13.4586	13.5727	13.6853	13.7946	13.9511	13.7192	14.0397	M1BWH3	Lupus la ribonucleoprotein
13.4282	13.6113	13.8875	13.0905	13.6004	13.9018	13.6872	13.9866	13.5598	13.4586	13.5727	13.6853	13.7946	13.9511	13.7192	14.0397	M1BWH4	Lupus la ribonucleoprotein
11.9498	10.962	11.9481	12.4736	11.5636	12.1917	11.6167	12.5376	11.0183	10.9692	10.605	10.9106	10.475	10.1797	10.8204	9.26997	M1BWK7	LRR receptor-like serine/threonine-protein kinase
14.8139	15.194	15.3485	15.202	14.9812	15.4567	15.5861	15.4795	15.7484	15.9836	15.7835	16.1391	16.0247	16.0685	15.9503	15.9839	M1BWP3	Argonaute protein group
14.3519	14.5963	14.6889	14.5575	14.6514	14.8935	15.2823	14.6825	13.9322	14.2113	10.2324	14.6048	14.3072	14.2262	14.3291	14.3437	M1BWR5	AML1
14.3519	14.5963	14.6889	14.5575	14.6514	14.8935	15.2823	14.6825	13.9322	14.2113	10.5982	14.6048	14.3072	14.2262	14.3291	14.3437	M1BWR6	AML1
14.3519	14.5963	14.6889	14.5575	14.6514	14.8935	15.2823	14.6825	13.9322	14.2113	9.98097	14.6048	14.3072	14.2262	14.3291	14.3437	M1BWR7	AML1
14.5566	14.8292	15.0426	14.9618	14.8171	15.3716	15.5122	15.3262	15.1904	15.8438	15.4905	15.6953	15.8785	16.0081	15.6805	16.078	M1BWR5	AML1
14.5566	14.8292	15.0426	14.9618	14.8171	15.3716	15.5122	15.3262	15.1904	15.8438	15.4905	15.6953	15.8785	16.0081	15.6805	16.078	M1BWR6	AML1
14.5566	14.8292	15.0426	14.9618	14.8171	15.3716	15.5122	15.3262	15.1904	15.8438	15.4905	15.6953	15.8785	16.0081	15.6805	16.078	M1BWR7	AML1
9.92399	9.36587	9.98044	10.2414	13.1589	11.4826	13.196	9.54134	13.8595	14.2948	10.0762	14.011	14.3633	14.4441	12.0644	14.5546	M1BWR5	AML1
10.3978	11.1183	11.4265	9.41473	13.1589	10.9545	13.196	10.3198	13.8595	14.2948	10.4198	14.011	14.3633	14.4441	11.9495	14.5546	M1BWR6	AML1
10.1931	11.0048	9.51867	9.58398	13.1589	9.48264	13.196	10.9962	13.8595	14.2948	9.33654	14.011	14.3633	14.4441	10.8359	14.5546	M1BWR7	AML1
15.4414	15.7915	15.8333	12.0334	15.5976	16.029	16.1826	16.2608	15.6164	15.6975	15.5126	9.48292	15.8624	15.9645	11.7041	15.9859	M1BWU1	DNA polymerase delta subunit 3
15.4414	15.7915	15.8333	12.0334	15.5976	16.029	16.1826	16.2608	15.6164	15.6975	15.5126	10.6614	15.8624	15.9645	11.7041	15.9859	M1BWU2	DNA polymerase delta subunit 3
15.4414	15.7915	15.8333	12.0334	15.5976	16.029	16.1826	16.2608	15.6164	15.6975	15.5126	10.3684	15.8624	15.9645	11.7041	15.9859	M1BWU3	DNA polymerase delta subunit 3
12.0487	12.627	12.8405	11.2363	11.9167	12.763	13.5302	13.1948	12.7679	13.1831	12.9041	13.7588	13.2687	13.3474	13.1455	13.5676	M1BWU1	DNA polymerase delta subunit 3
12.0487	12.627	12.8405	11.2363	11.9167	12.763	13.5302	13.1948	12.7679	13.1831	12.9041	13.7588	13.2687	13.3474	13.1455	13.5676	M1BWU2	DNA polymerase delta subunit 3
12.0487	12.627	12.8405	11.2363	11.9167	12.763	13.5302	13.1948	12.7679	13.1831	12.9041	13.7588	13.2687	13.3474	13.1455	13.5676	M1BWU3	DNA polymerase delta subunit 3
10.6031	11.3507	9.89266	13.2579	9.46657	11.0067	13.9158	10.1132	13.5359	14.0733	13.8319	10.4471	10.9381	13.9796	13.5175	11.5938	M1BX36	Digalactosyldiacylglycerol synthase 1
14.2865	12.1957	12.7482	11.9483	13.7458	12.5049	13.248	12.5669	11.8672	11.9611	12.2776	14.6926	11.8877	12.1482	12.4567	12.3137	M1BX68	White-brown-complex ABC transporter family
14.2096	14.6431	14.8645	14.1121	13.7484	14.6201	15.0967	14.7792	12.4795	13.2265	12.7042	13.6367	13.003	13.0368	12.6349	13.028	M1BX68	White-brown-complex ABC transporter family
14.1334	14.5791	14.5974	14.5253	14.318	14.7868	15.073	14.8868	15.1053	15.3938	15.1838	15.6154	15.4484	15.5065	15.4094	15.714	M1BXE8	Nuclear matrix constituent protein 2
10.754	10.9262	10.7486	10.4882	9.19075	10.9678	10.3772	9.25017	11.6195	11.3713	11.1274	11.6264	13.2445	13.4437	13.3008	13.4755	M1BXI8	Homeodomain leucine-zipper 1
8.72582	10.271	10.0496	10.3088	9.19075	10.7264	11.0869	11.5908	11.6195	8.22991	11.1274	11.6264	13.2445	13.4437	13.3008	13.4755	M1BXI9	Homeodomain leucine-zipper 1
11.1893	10.5485	9.51054	9.2407	10.358	10.8135	10.3703	11.3522	10.3412	10.6499	9.41348	11.0416	13.1662	13.1659	12.9856	13.1849	M1BXI8	Homeodomain leucine-zipper 1
10.1543	11.5524	11.1888	10.6659	10.1942	10.8135	10.9452	11.4823	10.3412	9.98465	9.41348	11.0416	13.1662	13.1659	12.9856	13.1849	M1BXI9	Homeodomain leucine-zipper 1
10.2005	11.1864	10.2571	9.08312	9.93326	9.21593	10.4034	11.5008	9.91342	10.6221	9.99197	10.8881	12.5336	12.4872	10.7922	12.6062	M1BXI8	Homeodomain leucine-zipper 1
10.7204	11.7102	11.4743	9.82168	10.1618	9.49962	9.53887	10.7568	10.228	10.0181	10.6365	9.82466	12.5336	12.4872	9.75726	12.6062	M1BXI9	Homeodomain leucine-zipper 1
13.6998	11.1901	15.3892	9.71306	9.77814	9.86659	10.7003	14.12	14.3209	12.1657	15.1064	15.6497	10.5027	15.1698	15.203	14.9552	M1BXK8	BSD domain-containing protein
13.6998	10.4995	15.3892	9.89524	10.4675	11.3581	11.4431	14.12	14.3209	10.5715	15.1064	15.6497	10.5102	15.1698	15.203	14.9552	M1BXK9	BSD domain-containing protein
13.8331	8.6601	14.2776	14.1842	13.4992	13.9925	14.5682	14.2842	9.66033	10.466	14.2161	14.6623	14.2322	10.6255	14.1534	14.5725	M1BXK8	BSD domain-containing protein
13.8331	9.40173	14.2776	14.1842	13.4992	13.9925	14.5682	14.2842	11.257	11.1714	14.2161	14.6623	14.2322	10.2417	14.1534	14.5725	M1BXK9	BSD domain-containing protein
13.6956	14.3224	14.2535	12.36	13.3284	14.3027	14.8092	14.5475	13.9087	14.4437	14.3328	14.9425	14.5943	14.6685	14.2773	15.0155	M1BXK8	BSD domain-containing protein
13.6956	14.3224	14.2535	12.36	13.3284	14.3027	14.8092	14.5475	13.9087	14.4437	14.3328	14.9425	14.5943	14.6685	14.2773	15.0155	M1BXK9	BSD domain-containing protein
18.092	18.5351	18.6759	18.3501	17.8902	18.6767	19.1414	18.9187	18.0772	18.5333	18.4005	18.828	18.6272	18.6692	18.2878	18.8187	M1BY00	Ethylene signaling protein
15.8484	16.3203	16.322	16.1398	15.8034	16.236	16.4364	16.435	16.0106	16.2805	16.1552	16.5462	16.1666	16.2791	16.1486	16.4961	M1BY00	Ethylene signaling protein
9.72632	14.6638	14.4924	9.17761	14.2678	14.9323	15.0523	15.0729	11.2709	10.6277	9.62936	15.2068	15.5812	9.74951	15.7087	15.8528	M1BY00	Ethylene signaling protein
9.96255	11.9848	12.3124	12.0577	11.9422	12.4941	12.6101	10.3125	10.8542	9.55724	9.87909	12.4335	12.7904	9.99513	12.2332	12.6255	M1BY00	Ethylene signaling protein
14.9856	15.2578	15.3737	15.2164	11.1762	15.6416	15.7694	9.87949	15.1778	15.4488	10.7334	10.3867	10.5386	15.4123	10.7796	15.4857	M1BY11	Protein kinase APK1A, chloroplast;Protein kinase APK1A, chloroplast
14.9856	15.2578	15.3737	15.2164	9.69124	15.6416	15.7694	10.4703	15.1778	15.4488	10.4514	10.734	10.2757	15.4123	11.5614	15.4857	M1BY13	Protein kinase APK1A, chloroplast;Protein kinase APK1A, chloroplast
15.0638	15.3334	15.3798	15.3693	14.8596	15.3093	15.4747	15.5026	15.3474	15.6681	15.6059	15.8078	15.8578	15.7833	15.565	15.9581	M1BYH9	Diacylglycerol kinase
15.0638	15.3334	15.3798	15.3693	14.8596	15.3093	15.4747	15.5026	15.3474	15.6681	15.6059	15.8078	15.8578	15.7833	15.565	15.9581	M1BYI0	Diacylglycerol kinase
13.3574	13.6268	13.389	13.4833	13.3616	13.6085	13.7343	13.6221	13.1381	13.3813	12.9983	13.0243	13.0236	13.0285	13.1186	13.1374	M1BYR6	Binding protein
10.0235	10.231	12.5569	8.96475	10.7623	12.4208	10.3222	12.9876	12.5644	12.5568	11.171	13.1712	12.8006	13.012	12.4969	12.9782	M1BYR6	Binding protein
15.791	16.0142	16.008	15.9399	15.4423	15.853	15.8731	15.8373	15.3016	15.8075	15.476	15.8318	15.5589	15.6093	15.5064	15.783	M1BYR9	Uncharacterized protein
16.9993	17.3701	17.3615	17.2892	16.5519	17.0813	17.7227	17.2958	16.8979	17.2973	17.1642	17.4274	17.3937	17.4632	17.243	17.6078	M1BYS2	Photosystem II oxygen-evolving complex protein 3
13.0757	13.3857	13.5425	13.275	12.7629	13.3042	14.2611	13.6519	14.2885	14.7567	14.9752	15.2368	15.0809	15.0615	14.7988	15.2409	M1BYS2	Photosystem II oxygen-evolving complex protein 3
12.8741	13.164	13.1762	10.4497	12.3316	9.76643	10.5279	9.68273	10.2109	12.9281	12.8673	10.955	12.3877	10.4986	12.5364	12.133	M1BYS2	Photosystem II oxygen-evolving complex protein 3
12.3284	13.265	10.4669	13.2421	12.8666	13.4652	13.5568	13.4247	12.7162	13.0221	13.0256	13.3488	12.4992	10.4865	12.3674	11.1694	M1BYT5	Mechanosensitive ion channel protein
10.3689	12.3657	10.2639	9.04708	11.1155	11.7334	10.6881	12.038	11.6084	10.8242	12.1625	12.237	11.0543	11.5435	11.6324	10.493	M1BYY9	DUF4057 domain-containing protein
14.3831	14.7145	15.0386	14.8158	14.7784	14.9241	15.3516	15.2526	13.7216	14.0377	13.8215	14.1467	14.2808	14.4319	14.1992	14.3935	M1BZ24	Carbohydrate transporter
15.8764	17.6764	17.7617	16.1925	15.6766	16.1032	16.1481	9.48772	15.9971	10.1846	16.0928	18.0535	16.0432	16.0359	16.056	16.2173	M1BZG1	Villin headpiece;Gelsolin region
15.5331	11.0458	10.9349	15.9552	15.3277	16.0535	16.1004	16.1812	10.4025	9.75721	10.6029	9.13543	16.0489	16.2567	9.94428	16.2155	M1BZG1	Villin headpiece;Gelsolin region
13.511	11.5892	13.7713	13.3656	13.8994	14.3468	14.356	14.222	13.6292	14.0813	10.3112	13.9837	10.4533	14.5715	14.3877	14.6336	M1BZG1	Villin headpiece;Gelsolin region
16.0272	16.4867	16.7017	16.5627	15.4684	16.3493	16.67	16.5087	16.2502	16.7379	16.4258	16.7549	16.2975	16.6437	16.2751	16.3869	M1BZG1	Villin headpiece;Gelsolin region
9.28713	13.3409	13.3867	13.459	13.3716	9.88253	13.4416	13.6493	12.9811	12.9227	13.0819	13.317	13.4943	13.4449	13.2713	13.6011	M1BZG1	Villin headpiece;Gelsolin region
10.8289	10.9142	11.3128	11.0098	10.2085	11.104	9.81215	11.6847	10.8381	10.7584	11.5321	11.001	11.5241	11.5375	11.3697	11.0082	M1BZJ1	Serine endopeptidase degp2
16.5249	16.948	16.8445	16.7864	16.333	16.7957	16.8805	16.936	16.7178	16.9433	16.7436	10.7992	16.9276	17.1831	17.088	17.0985	M1BZP9	Photosystem I reaction center subunit IV B isoform 2
16.1463	16.2802	16.4213	16.4167	15.9508	16.441	16.7243	16.5946	16.3107	16.6775	16.5043	16.8576	16.7833	16.8252	16.5592	16.8116	M1BZT2	RNA helicase
16.1463	16.2802	16.4213	16.4167	15.9508	16.441	16.7243	16.5946	16.3107	16.6775	16.5043	16.8576	16.7833	16.8252	16.5592	16.8116	M1D8C5	RNA helicase
17.8721	18.2268	18.2281	18.141	17.388	17.927	18.317	18.1336	17.7482	18.048	17.9776	18.1364	17.9577	17.9679	17.7679	18.0246	M1BZW7	Transketolase
10.7094	13.0691	13.1826	12.8415	12.496	13.0269	13.6024	13.3529	10.5552	10.2129	11.0274	13.533	10.9618	9.65256	9.81505	13.6087	M1BZW7	Transketolase
17.4517	17.7933	17.9121	17.7532	16.9906	17.5761	18.1992	17.8869	17.2541	17.5605	17.7007	17.9644	17.7853	17.7525	17.4383	17.9382	M1C004	Phosphoglycerate kinase
13.7958	13.8558	14.0945	13.4023	13.5494	14.1244	14.549	14.3981	13.9686	14.2544	14.2846	14.3427	14.4635	14.5983	14.3928	14.7197	M1C004	Phosphoglycerate kinase
14.2225	14.6233	14.6469	9.73915	10.0735	9.9208	15.136	15.0966	15.191	15.4545	11.3025	15.4853	9.55528	10.682	9.93774	12.4089	M1C004	Phosphoglycerate kinase
11.5722	11.5728	12.0723	11.9583	9.74585	11.5677	9.22115	12.0044	11.6863	12.0879	10.5472	11.5211	11.1614	11.2875	12.0548	12.2782	M1C004	Phosphoglycerate kinase
14.6456	14.947	14.9793	14.7744	14.087	14.8452	14.6982	14.795	14.7796	15.0618	14.9033	14.8613	14.8336	15.161	14.9023	14.8468	M1C004	Phosphoglycerate kinase
13.3871	11.7431	12.1193	13.367	12.2961	12.8524	11.627	13.3849	10.5515	10.4358	13.1311	10.7623	12.6151	12.6575	12.2557	12.5386	M1C015	Hydroxymethylbilane synthase
11.5188	12.282	12.3107	9.93297	11.7019	10.117	13.0122	12.6547	10.5786	12.5531	12.226	13.0406	12.8268	13.2616	12.97	13.2974	M1C046	WRKY DNA-binding protein
11.5188	12.282	12.3107	11.0076	11.7019	8.36598	13.0122	12.6547	10.4255	12.5531	12.226	13.0406	12.8268	13.2616	12.97	13.2974	M1C047	WRKY DNA-binding protein
14.0028	14.0232	14.3095	13.9951	14.0029	14.1544	14.1956	14.2107	14.4349	14.6998	14.2843	14.6041	14.5787	14.6142	14.2566	14.3542	M1C0B2	RNA-binding protein
11.937	12.3094	12.5792	12.6388	12.1843	10.9953	10.6276	12.4178	10.7906	11.6757	10.816	10.1614	10.1986	13.0093	12.9579	12.0062	M1C0B2	RNA-binding protein
11.7726	11.7795	11.95	9.95292	9.17803	10.7044	11.5938	10.8165	11.7738	11.8009	11.6628	10.2745	11.9231	11.6354	11.5476	10.4876	M1C0B2	RNA-binding protein
13.4313	13.7325	13.5996	13.4952	12.5076	13.0513	13.5227	13.3092	13.8438	14.8936	14.1049	14.6166	14.009	13.8855	13.9034	13.8934	M1C0B3	Ccaat-binding transcription factor subunit A
13.1607	13.094	13.1724	13.0718	12.5867	10.096	10.5522	13.2671	13.0361	13.2068	12.7599	12.9997	11.0846	11.8141	12.4263	12.0249	M1C0J7	Small ubiquitin-related modifier
14.5827	14.8242	15.0751	9.52157	15.0857	15.217	15.2757	15.7078	15.4777	15.84	15.664	15.894	15.8916	15.1193	14.3801	15.1532	M1C0Q1	Peptidyl-prolyl cis-trans isomerase
13.9721	14.4921	14.7325	13.9646	13.3699	13.863	10.8272	13.9065	13.4653	13.7264	10.3928	9.61981	13.9191	13.831	13.7247	13.6736	M1C0V6	Fructose-bisphosphate aldolase
14.4105	14.8499	12.0199	10.3002	14.2115	14.7525	11.3186	15.1109	14.6972	14.9553	14.8227	15.0348	15.0505	15.2378	15.0044	15.314	M1C0V6	Fructose-bisphosphate aldolase
12.2173	12.395	12.6306	11.9589	12.057	12.2578	13.1618	12.6722	12.3046	12.5384	12.6638	13.0397	13.1358	13.0237	12.7025	13.3034	M1C0X1	F-box family protein
12.2173	12.395	12.6306	11.9589	12.057	12.2578	13.1618	12.6722	12.3046	12.5384	12.6638	13.0397	13.1358	13.0237	12.7025	13.3034	M1C0X2	F-box family protein
15.2701	15.3902	15.5061	15.4842	14.8499	15.3168	15.3879	15.3773	15.4815	15.8071	15.7144	15.9119	15.734	15.5704	15.5486	15.6084	M1C0Y2	Transporter
15.2701	15.3902	15.5061	15.4842	14.8499	15.3168	15.3879	15.3773	15.4815	15.8071	15.7144	15.9119	15.734	15.5704	15.5486	15.6084	M1C0Y3	Transporter
14.9947	14.6973	14.6084	14.1998	14.2666	13.9516	14.5046	14.4319	15.1315	15.0136	15.3574	15.3778	15.8346	15.1827	15.4435	15.6114	M1C0Y2	Transporter
14.9947	14.6973	14.6084	14.1998	14.2666	13.9516	14.5046	14.4319	15.1315	15.0136	15.3574	15.3778	15.8346	15.1827	15.4435	15.6114	M1C0Y3	Transporter
15.8978	16.1703	16.2811	16.3193	15.8434	16.4994	15.994	16.1899	16.3459	16.8214	16.5498	16.2021	16.4602	16.7187	16.6783	16.3198	M1C159	Calcium-dependent protein kinase CDPK1
14.9301	15.5922	15.6252	14.4914	14.9146	15.496	15.1803	15.4333	15.575	15.8622	15.9011	15.6219	15.6068	15.9897	15.8011	15.6632	M1C159	Calcium-dependent protein kinase CDPK1
14.9301	15.5922	15.6252	14.4914	14.9146	15.496	15.1803	15.4333	15.575	15.8622	15.9011	15.6219	15.6068	15.9897	15.8011	15.6632	M1C159	Calcium-dependent protein kinase CDPK1
12.3832	11.2051	10.1354	12.5856	12.7502	13.0894	11.3894	10.2546	12.4073	12.591	12.4066	12.6577	13.0165	11.9269	11.1656	9.40344	M1C1A3	Structural molecule
13.4043	13.3846	13.6602	12.7473	13.3627	13.7692	13.9564	13.4375	13.7472	14.3161	14.0153	14.0127	14.6596	14.5556	14.2529	14.1913	M1C1E8	Protein-serine/threonine phosphatase;Protein-serine/threonine phosphatase;Double-stranded RNA binding protein
13.4043	13.3846	13.6602	12.7473	13.3627	13.7692	13.9564	13.4375	13.7472	14.3161	14.0153	14.0127	14.6596	14.5556	14.2529	14.1913	M1C1E9	Protein-serine/threonine phosphatase;Protein-serine/threonine phosphatase;Double-stranded RNA binding protein
13.4043	13.3846	13.6602	12.7473	13.3627	13.7692	13.9564	13.4375	13.7472	14.3161	14.0153	14.0127	14.6596	14.5556	14.2529	14.1913	M1C1F0	Protein-serine/threonine phosphatase;Protein-serine/threonine phosphatase;Double-stranded RNA binding protein
16.1743	16.5871	16.6056	16.3357	16.2295	16.5849	16.6291	16.6157	15.8411	16.4569	15.8663	16.2507	16.217	16.4551	16.3029	16.5157	M1C1H0	Usp domain-containing protein
16.1743	16.5871	16.6056	16.3357	16.2295	16.5849	16.6291	16.6157	15.8411	16.4569	15.8663	16.2507	16.217	16.4551	16.3029	16.5157	M1C1H1	Usp domain-containing protein
16.1743	16.5871	16.6056	16.3357	16.2295	16.5849	16.6291	16.6157	15.8411	16.4569	15.8663	16.2507	16.217	16.4551	16.3029	16.5157	M1C1H2	Usp domain-containing protein
13.5543	13.9752	14.2447	13.6491	13.8163	14.3283	15.1025	14.6791	13.5442	14.213	14.0245	14.5595	14.9277	14.8448	14.582	15.0696	M1C1K8	Secretory carrier-associated membrane protein
13.5543	13.9752	14.2447	13.6491	13.8163	14.3283	15.1025	14.6791	13.5442	14.213	14.0245	14.5595	14.9277	14.8448	14.582	15.0696	M1C1K9	Secretory carrier-associated membrane protein
13.9615	14.1899	13.9373	13.4768	13.6225	13.6605	13.8462	13.9763	14.4988	14.4358	14.3966	14.7107	14.8906	14.7029	14.8105	15.1101	M1C1L8	Transcription factor
13.6887	13.7588	13.9813	13.8925	13.594	14.0914	14.1641	14.3428	14.0528	14.0294	14.2109	14.4103	14.8416	14.5939	14.3188	14.7564	M1C1L8	Transcription factor
10.0388	7.93625	9.95751	10.8235	10.0005	10.8665	9.91922	10.7852	9.80574	10.4138	9.46649	10.4951	9.34688	8.41859	9.4282	9.13184	M1C1N2	Splicing factor 3B subunit
10.0388	7.93625	9.95751	10.8235	10.0005	10.8665	9.91922	10.7852	9.80574	10.4138	9.46649	10.4951	9.34688	8.41859	9.4282	9.13184	M1C1N2	Splicing factor 3B subunit
14.3972	14.6838	10.2204	14.8222	13.9174	14.6684	14.5981	14.6015	14.4986	14.5718	14.4254	11.145	14.7199	14.7897	14.5546	14.7927	M1C1N5	RNA polymerase-associated protein RTF1
15.7943	16.2979	16.5511	16.1422	15.7086	16.6195	17.1179	16.8865	16.0194	16.7601	16.6694	16.972	16.8544	16.8492	16.5203	16.9656	M1C1R9	Serine/threonine-protein kinase cdk9
11.8954	9.35566	11.9619	11.9645	9.82322	9.21601	12.1226	12.2604	12.153	10.3556	10.018	9.06287	10.0723	10.4633	11.4322	9.99517	M1C1T3	Transcription regulator
13.0087	13.205	13.113	13.0506	12.5963	13.1117	12.8317	12.8401	13.0865	13.2949	13.244	13.1118	13.2094	13.1215	13.1576	13.3718	M1C1T3	Transcription regulator
21.7223	21.984	22.2334	21.9336	21.6511	22.2003	22.2306	22.2467	21.9096	22.3291	22.0794	22.2537	22.6095	22.6716	22.5627	22.7296	M1C1T9	Phototropin-2
15.7069	10.3031	17.8473	9.43884	10.322	10.3127	10.8935	16.2567	9.76292	16.0813	16.0432	17.4244	16.0976	10.7609	10.7153	11.1103	M1C1T9	Phototropin-2
13.7823	14.3679	14.4446	10.9873	13.8413	14.2203	14.5465	14.4841	14.1891	14.4671	14.3261	14.4191	14.5208	14.8458	14.6404	14.7504	M1C1T9	Phototropin-2
13.7823	14.3679	14.4446	10.1737	13.8413	14.2203	14.5465	14.4841	14.1891	14.4671	14.3261	14.4191	14.5208	14.8458	14.6404	14.7504	M1C1T9	Phototropin-2
18.2412	18.4345	18.6544	18.4372	18.3472	18.6958	18.8836	18.8991	18.7313	19.0233	18.6743	19.0212	18.6503	18.7532	18.5624	18.6762	M1C1T9	Phototropin-2
17.7083	17.9685	18.0268	17.6487	17.8651	18.1478	18.3367	18.358	17.4361	17.6227	17.384	17.6407	18.0475	18.2234	17.9621	18.0988	M1C1T9	Phototropin-2
12.824	14.7119	14.1978	9.16729	14.4887	13.7587	15.0171	15.4015	13.0904	13.2077	14.1738	14.3557	15.4791	15.6019	15.5497	15.5394	M1C1T9	Phototropin-2
12.824	14.7119	14.1978	9.16729	14.4887	13.7587	15.0171	15.4015	13.0904	13.2077	14.1738	14.3557	15.4791	15.6019	15.5497	15.5394	M1C1T9	Phototropin-2
18.6406	18.954	19.2852	19.0291	17.7582	18.516	19.0234	18.8645	17.9138	18.6309	18.3332	18.9015	18.5982	18.7874	18.3705	18.8415	M1C1T9	Phototropin-2
15.6769	15.8981	15.959	16.0302	15.1959	15.8334	16.131	15.8876	15.48	15.929	15.676	16.0589	16.3064	16.2145	16.0823	16.3473	M1C1T9	Phototropin-2
14.7881	15.6319	15.8342	15.5106	14.8569	15.6573	15.9186	16.0321	14.259	15.2623	15.0841	15.6079	15.9197	15.9169	15.9011	16.3262	M1C1T9	Phototropin-2
10.3708	10.1448	10.2143	10.0134	10.1459	9.89295	10.0516	9.36281	10.7826	11.123	10.7997	11.2277	11.1709	11.0177	10.9818	10.9879	M1C1T9	Phototropin-2
12.8894	13.1796	13.2219	13.2947	12.719	12.9713	13.1883	13.1757	12.8072	10.352	12.9513	13.2838	13.0637	13.0057	12.8744	13.0599	M1C1V3	DNAJ heat shock N-terminal domain-containing protein
16.5182	16.8918	17.1173	16.9957	16.4269	16.9723	16.7875	16.8273	16.705	16.9463	17.0285	17.1806	17.0462	17.3784	17.0126	17.308	M1C235	Arginine/serine-rich-splicing factor
13.9614	14.1576	14.4683	13.7724	14.1329	14.4392	14.2116	14.5082	14.4724	14.6532	14.9461	14.9269	15.0457	15.0271	14.8441	14.6812	M1C235	Arginine/serine-rich-splicing factor
13.9614	14.1576	14.4683	13.7724	14.1329	14.4392	14.2116	14.5082	14.4724	14.6532	14.9461	14.9269	15.0457	15.0271	14.8441	14.6812	M1C235	Arginine/serine-rich-splicing factor
12.4365	12.833	10.0553	13.1074	12.9777	13.3831	13.5706	9.23715	11.7524	9.81213	12.2052	12.2956	12.7319	12.336	12.3065	12.7294	M1C256	Calcium-dependent protein kinase
10.7713	11.1798	11.6851	10.7214	11.34	11.7861	11.7241	11.4578	11.777	11.7513	12.0081	12.503	12.2852	12.5149	12.4139	12.6946	M1C258	Uncharacterized protein
17.5127	17.8843	17.9754	17.9746	17.5795	18.1309	18.1454	18.2383	18.2623	18.1511	18.2982	18.6263	18.3491	18.3437	18.3725	18.4024	M1C269	Uncharacterized protein
9.70528	11.4834	10.3372	10.1466	9.09507	10.8218	16.099	11.8039	11.2514	16.4061	16.1946	16.7015	16.2633	16.4495	11.1191	16.5738	M1C269	Uncharacterized protein
14.8913	15.2497	15.3659	15.1253	14.9255	15.4777	15.5432	15.6191	16.1845	16.4354	16.2575	16.5832	16.4575	16.4984	16.293	16.4704	M1C269	Uncharacterized protein
15.1924	15.4356	15.2159	15.488	15.0004	15.5512	15.7412	15.677	15.5962	15.9238	15.6976	16.0109	16.0125	16.0099	15.8128	16.0992	M1C269	Uncharacterized protein
14.6134	14.7991	15.0039	12.4535	14.1816	14.5251	14.405	14.8024	15.3275	15.0835	15.4543	15.3904	15.4376	15.5635	15.4413	15.8014	M1C269	Uncharacterized protein
14.6134	14.7991	15.0039	12.4535	14.1816	14.5251	14.405	14.8024	15.3275	15.0835	15.4543	15.3904	15.4376	15.5635	15.4413	15.8014	M1C269	Uncharacterized protein
14.3868	14.5636	14.8594	14.574	13.4261	14.5435	14.8968	14.6918	14.2526	14.8396	14.2844	14.961	14.5637	14.552	14.4942	14.8533	M1C269	Uncharacterized protein
13.4738	13.7946	13.6891	13.6285	13.2589	13.461	13.7538	13.9456	14.5169	14.8957	14.6793	14.805	14.5557	14.6481	14.4904	14.7059	M1C269	Uncharacterized protein
12.1299	12.7747	12.6859	11.7423	11.5994	12.4397	12.4903	12.5099	12.6751	13.0208	12.7826	13.4026	13.3009	13.0719	12.6431	13.4093	M1C269	Uncharacterized protein
15.7169	16.3787	16.3786	16.1203	15.6011	16.2453	16.8016	16.6188	10.2662	16.1082	16.103	11.5973	15.9492	16.1248	15.9029	16.2045	M1C2D1	DUF569 domain-containing protein;Uncharacterized protein;Uncharacterized protein;DUF569 domain-containing protein
15.7169	16.3787	16.3786	16.1203	15.6011	16.2453	16.8016	16.6188	10.8262	16.1082	16.103	10.3613	15.9492	16.1248	15.9029	16.2045	M1C2D2	DUF569 domain-containing protein;Uncharacterized protein;Uncharacterized protein;DUF569 domain-containing protein
15.7169	16.3787	16.3786	16.1203	15.6011	16.2453	16.8016	16.6188	10.8114	16.1082	16.103	9.80935	15.9492	16.1248	15.9029	16.2045	M1C2D3	DUF569 domain-containing protein;Uncharacterized protein;Uncharacterized protein;DUF569 domain-containing protein
15.7169	16.3787	16.3786	16.1203	15.6011	16.2453	16.8016	16.6188	9.26753	16.1082	16.103	10.7977	15.9492	16.1248	15.9029	16.2045	M1C2D4	DUF569 domain-containing protein;Uncharacterized protein;Uncharacterized protein;DUF569 domain-containing protein
16.9483	16.9497	17.3611	17.3001	16.3393	16.9115	17.1003	17.2567	17.0762	17.3242	17.1349	17.612	17.3252	17.4431	17.2159	17.4499	M1C2J5	Serine/threonine protein kinase
16.9483	16.9497	17.3611	17.3001	16.3393	16.9115	17.1003	17.2567	17.0762	17.3242	17.1349	17.612	17.3252	17.4431	17.2159	17.4499	M1C2J6	Serine/threonine protein kinase
16.9483	16.9497	17.3611	17.3001	16.3393	16.9115	17.1003	17.2567	17.0762	17.3242	17.1349	17.612	17.3252	17.4431	17.2159	17.4499	M1C2J7	Serine/threonine protein kinase
12.5534	12.8235	13.0513	13.034	11.6978	12.1212	13.0661	12.6357	12.6199	12.7876	12.8346	13.3184	12.4522	11.0017	9.79874	12.4957	M1C2K2	Acyl-CoA binding protein
12.5534	12.8235	13.0513	13.034	11.6978	12.1212	13.0661	12.6357	12.6199	12.7876	12.8346	13.3184	12.4522	11.035	11.0189	12.4957	M1C2K4	Acyl-CoA binding protein
12.4685	12.7624	12.6782	12.8939	12.2746	12.6342	12.8355	12.6574	12.1555	12.7324	12.5204	12.7501	12.6408	12.6638	12.7836	12.7042	M1C2L9	RNA-binding protein AKIP1
12.4685	12.7624	12.6782	12.8939	12.2746	12.6342	12.8355	12.6574	12.1555	12.7324	12.5204	12.7501	12.6408	12.6638	12.7836	12.7042	M1C2M2	RNA-binding protein AKIP1
12.4685	12.7624	12.6782	12.8939	12.2746	12.6342	12.8355	12.6574	12.1555	12.7324	12.5204	12.7501	12.6408	12.6638	12.7836	12.7042	M1C2M3	RNA-binding protein AKIP1
17.9265	18.3304	18.4125	17.9502	17.53	18.1785	18.3814	18.347	17.797	18.2472	18.0956	18.4986	18.3597	18.4534	18.3357	18.6096	M1C2T5	MINDY_DUB domain-containing protein
10.0423	10.7396	14.0305	13.5941	11.0804	10.276	14.0251	10.7194	10.2255	12.6165	9.10136	13.0746	14.9002	9.69041	14.724	14.9508	M1C2X1	RanBD1 domain-containing protein
12.0062	9.73679	12.5886	10.4991	12.2057	12.6166	13.1245	12.8392	13.1482	9.22569	13.2442	13.763	13.7355	13.7848	13.3938	13.6622	M1C2Y4	Protein kinase
12.0062	11.5451	12.5886	10.0352	12.2057	12.6166	13.1245	12.8392	13.1482	9.57547	13.2442	13.763	13.7355	13.7848	13.3938	13.6622	M1C2Y5	Protein kinase
12.0062	9.09507	12.5886	9.30458	12.2057	12.6166	13.1245	12.8392	13.1482	10.2295	13.2442	13.763	13.7355	13.7848	13.3938	13.6622	M1C2Y7	Protein kinase
12.0062	9.60604	12.5886	10.513	12.2057	12.6166	13.1245	12.8392	13.1482	10.8357	13.2442	13.763	13.7355	13.7848	13.3938	13.6622	M1C2Y8	Protein kinase
12.9761	13.5625	10.4407	13.1201	10.2091	10.2325	13.9902	13.8054	10.1858	13.8357	11.1091	14.1114	13.9203	13.9806	9.57791	14.1571	M1C321	Plasmalemma Na+/H+ antiporter
15.5964	15.7068	15.9219	15.8774	15.4307	15.9625	16.014	16.007	16.0838	16.2053	16.1649	16.3965	16.263	16.3499	16.1921	16.4063	M1C3A3	Uncharacterized protein
15.5964	15.7068	15.9219	15.8774	15.4307	15.9625	16.014	16.007	16.0838	16.2053	16.1649	16.3965	16.263	16.3499	16.1921	16.4063	M1C3A4	Uncharacterized protein
12.7877	12.4796	12.5488	12.2269	10.126	12.7961	10.6333	11.3698	9.77351	13.1181	13.8154	13.1696	14.399	13.6016	13.2865	14.438	M1C3A6	Interferon-induced guanylate-binding protein
12.7877	12.4796	12.5488	12.2269	10.0637	12.7961	11.4547	10.0561	9.63998	13.1181	13.8154	13.1696	14.399	13.6016	13.2865	14.438	M1C3A7	Interferon-induced guanylate-binding protein
12.509	9.71162	12.7421	12.248	13.156	13.1661	13.2544	13.3355	12.5584	12.6136	12.7987	12.9781	13.1434	12.942	13.0804	13.0877	M1C3A7	Interferon-induced guanylate-binding protein
11.6442	10.7887	11.0617	8.47681	11.25	10.6533	11.2774	11.6037	11.0671	11.9516	10.9935	11.726	11.9365	12.012	11.4897	11.7612	M1C3A6	Interferon-induced guanylate-binding protein
11.6442	10.7887	11.0617	10.7057	11.25	10.6533	11.2774	11.6037	11.0671	11.9516	10.9935	11.726	11.9365	12.012	11.4897	11.7612	M1C3A7	Interferon-induced guanylate-binding protein
9.98573	12.5485	13.0868	12.8472	12.8108	10.3344	13.3526	10.4297	13.3784	13.6609	13.5095	13.8736	13.7722	13.5684	13.5178	13.6615	M1C3C8	Zinc finger family protein
10.2303	12.5485	13.0868	12.8472	12.8108	10.9387	13.3526	9.73219	13.3784	13.6609	13.5095	13.8736	13.7722	13.5684	13.5178	13.6615	M1C3C9	Zinc finger family protein
13.6901	13.7043	14.159	13.78	9.71453	13.1971	11.4608	13.3685	10.5964	9.36805	9.80272	12.8438	10.9589	10.9626	11.0967	10.0377	M1C3D5	Uncharacterized protein
13.3946	9.32755	10.844	8.95784	9.04514	13.6185	10.3649	9.28083	11.4425	13.9264	13.8708	14.2263	13.7945	9.92428	13.7659	9.7854	M1C3I3	Oligouridylate binding protein
13.3946	8.81837	10.375	9.65468	10.8816	13.6185	11.7474	10.6872	11.0788	13.9264	13.8708	14.2263	13.7945	11.8524	13.7659	10.8752	Q2XPV3	Oligouridylate binding protein
12.6592	13.011	12.929	12.3902	12.8712	13.1484	13.5796	13.3503	12.9805	13.3177	13.0435	13.3569	13.3673	13.4772	13.4117	13.6275	M1C3I3	Oligouridylate binding protein
12.6592	13.011	12.929	12.3902	12.8712	13.1484	13.5796	13.3503	12.9805	13.3177	13.0435	13.3569	13.3673	13.4772	13.4117	13.6275	Q2XPV3	Oligouridylate binding protein
12.7984	12.9035	11.502	13.3176	12.9752	13.2909	13.2109	13.0201	12.9497	13.2579	13.1453	13.3987	11.952	9.99411	13.0277	13.0254	M1C3J9	Lipase class 3 protein
12.7984	12.9035	11.0556	13.3176	12.9752	13.2909	13.2109	13.0201	12.9497	13.2579	13.1453	13.3987	11.1962	10.87	13.0277	13.0254	M1C3K0	Lipase class 3 protein
12.7984	12.9035	9.85806	13.3176	12.9752	13.2909	13.2109	13.0201	12.9497	13.2579	13.1453	13.3987	9.73171	10.6879	13.0277	13.0254	M1C3K2	Lipase class 3 protein
10.6757	9.80972	10.757	9.89104	10.714	9.84801	10.7953	9.35536	8.59865	8.91245	9.43477	9.55192	10.4879	10.4147	10.3792	11.371	M1C3P4	Transcription factor BZIP1
10.6757	9.80972	10.757	9.89104	10.714	9.84801	10.7953	9.35536	8.59865	8.91245	9.43477	9.55192	10.4879	10.4147	10.3792	11.371	M1C3P5	Transcription factor BZIP1
10.6757	9.80972	10.757	9.89104	10.714	9.84801	10.7953	9.35536	8.59865	8.91245	9.43477	9.55192	10.4879	10.4147	10.3792	11.371	M1C3P7	Transcription factor BZIP1
16.6494	16.9932	16.969	16.3709	16.6903	16.8994	16.9636	17.1548	16.9813	17.1938	16.3078	17.2064	16.8838	16.9546	17.0366	16.773	M1C4F8	Peptidylprolyl isomerase;Multidomain cyclophilin type peptidyl-prolyl cis-trans isomerase
16.6494	16.9932	16.969	16.3709	16.6903	16.8994	16.9636	17.1548	16.9813	17.1938	16.3078	17.2064	16.8838	16.9546	17.0366	16.773	M1C4F8	Peptidylprolyl isomerase;Multidomain cyclophilin type peptidyl-prolyl cis-trans isomerase
16.6494	16.9932	16.969	16.3709	16.6903	16.8994	16.9636	17.1548	16.9813	17.1938	16.3078	17.2064	16.8838	16.9546	17.0366	16.773	M1C4F9	Peptidylprolyl isomerase;Multidomain cyclophilin type peptidyl-prolyl cis-trans isomerase
16.6494	16.9932	16.969	16.3709	16.6903	16.8994	16.9636	17.1548	16.9813	17.1938	16.3078	17.2064	16.8838	16.9546	17.0366	16.773	M1C4F9	Peptidylprolyl isomerase;Multidomain cyclophilin type peptidyl-prolyl cis-trans isomerase
15.4289	15.5308	15.7199	15.6232	15.3492	15.608	15.776	15.7702	15.5155	15.7674	15.6389	15.7968	15.7315	15.6038	15.5691	15.6485	M1C4F8	Peptidylprolyl isomerase;Multidomain cyclophilin type peptidyl-prolyl cis-trans isomerase
15.4289	15.5308	15.7199	15.6232	15.3492	15.608	15.776	15.7702	15.5155	15.7674	15.6389	15.7968	15.7315	15.6038	15.5691	15.6485	M1C4F9	Peptidylprolyl isomerase;Multidomain cyclophilin type peptidyl-prolyl cis-trans isomerase
14.6406	14.9049	15.0358	14.8034	14.3467	14.9227	15.1481	15.1011	14.6334	15.2171	14.9734	15.4232	15.2375	15.2543	14.9938	15.477	M1C4Z2	Uncharacterized protein
13.8107	14.0132	14.4371	14.1801	13.7774	14.5153	14.4093	14.5322	14.5993	14.7792	14.7751	15.0384	15.2709	15.3892	15.0926	15.3942	M1C5C7	Ankyrin repeat protein
13.8107	14.0132	14.4371	14.1801	13.7774	14.5153	14.4093	14.5322	14.5993	14.7792	14.7751	15.0384	15.2709	15.3892	15.0926	15.3942	M1C5D0	Ankyrin repeat protein
11.1385	13.0426	11.517	9.5933	9.69901	10.7033	13.3245	13.0942	9.60728	14.2221	14.2433	11.9828	14.6301	12.2157	11.0651	12.1125	M1C5E0	Phosphatase
12.8629	13.3309	13.4735	12.7627	13.0082	13.6666	14.0893	13.6524	10.7348	13.8364	13.7114	14.2526	14.4117	14.3185	13.9714	14.6461	M1C5E0	Phosphatase
16.4494	16.6791	16.7946	15.2454	16.257	16.3014	17.8978	17.1911	16.329	16.4349	16.7336	16.9971	16.7358	16.5811	16.2838	16.9279	M1C5E6	60S acidic ribosomal protein P0
11.9176	12.3894	12.4894	12.4075	11.672	12.0991	12.5369	12.3354	11.4994	11.9265	11.8483	11.8196	11.6586	11.6152	10.9618	11.4108	M1C5E6	60S acidic ribosomal protein P0
15.5433	15.6759	9.47494	9.74791	10.2789	15.6143	15.9103	15.7509	16.1979	16.6345	12.0691	16.4909	11.2373	9.23847	10.4074	16.3268	M1C5R2	Far upstream element-binding protein
15.5433	15.6759	11.4875	10.4881	8.99225	15.6143	15.9103	15.7509	16.1979	16.6345	11.516	16.4909	10.7609	11.61	10.0278	16.3268	M1C5R3	Far upstream element-binding protein
13.3289	10.7994	15.2139	15.1434	14.8324	9.66818	13.786	10.8901	11.1448	10.5513	13.6286	11.3463	10.4432	9.37259	10.4767	13.8501	M1C5R2	Far upstream element-binding protein
13.3289	10.8369	15.2139	15.1434	14.8324	11.139	13.786	8.99008	10.6556	10.2288	13.6286	9.62343	10.688	10.1867	10.4171	13.8501	M1C5R3	Far upstream element-binding protein
13.9827	14.2679	14.4022	14.1791	14.0153	14.295	14.3221	14.4492	14.6432	14.4409	14.6124	15.1673	14.9051	14.8674	15.0996	15.0988	M1C5U9	Arginine/serine-rich splicing factor
13.9827	14.2679	14.4022	14.1791	14.0153	14.295	14.3221	14.4492	14.6432	14.4409	14.6124	15.1673	14.9051	14.8674	15.0996	15.0988	M1C5V0	Arginine/serine-rich splicing factor
11.8394	12.8548	11.7551	9.65845	12.4428	11.388	12.7336	10.6465	12.1359	11.9665	12.4359	13.5009	13.7395	12.2636	12.1943	12.1167	M1C5U9	Arginine/serine-rich splicing factor
11.8394	12.8548	11.7551	9.24638	12.4428	10.5648	12.7336	10.7695	12.1359	11.9665	12.4359	13.5009	13.7395	12.2636	12.1943	12.1167	M1C5V0	Arginine/serine-rich splicing factor
12.5121	12.5874	12.971	12.4794	11.8803	12.5259	13.1911	12.9054	9.54176	10.4899	10.8462	11.4981	11.027	11.1443	10.8321	11.0898	M1C5X1	Sulfate transporter
12.5711	13.2252	12.8552	11.5001	12.2269	12.5878	12.6673	12.8341	13.2196	13.2992	13.4278	13.5745	11.9321	12.0184	12.0229	11.9132	M1C639	Ubiquitin thiolesterase
12.5711	13.2252	12.8552	11.5001	12.2269	12.5878	12.6673	12.8341	13.2196	13.2992	13.4278	13.5745	11.9321	12.0184	12.0229	11.9132	M1C639	Ubiquitin thiolesterase
12.5711	13.2252	12.8552	11.5001	12.2269	12.5878	12.6673	12.8341	13.2196	13.2992	13.4278	13.5745	11.9321	12.0184	12.0229	11.9132	M1C640	Ubiquitin thiolesterase
12.5711	13.2252	12.8552	11.5001	12.2269	12.5878	12.6673	12.8341	13.2196	13.2992	13.4278	13.5745	11.9321	12.0184	12.0229	11.9132	M1C640	Ubiquitin thiolesterase
13.0643	13.1091	13.4548	12.8096	12.5607	10.6153	11.6198	13.352	13.9002	14.0027	14.0146	13.994	13.5394	14.1217	14.037	14.0744	M1C6B2	PRP38_assoc domain-containing protein;PRP38_assoc domain-containing protein;Pre-mRNA-splicing factor 38
13.0643	13.1091	13.4548	12.8096	12.5607	12.0546	11.6198	13.352	13.9002	14.0027	14.0146	13.994	13.5394	14.1217	14.037	14.0744	M1C6B3	PRP38_assoc domain-containing protein;PRP38_assoc domain-containing protein;Pre-mRNA-splicing factor 38
13.0643	13.1091	13.4548	12.8096	12.5607	11.1037	11.6198	13.352	13.9002	14.0027	14.0146	13.994	13.5394	14.1217	14.037	14.0744	M1C6B4	PRP38_assoc domain-containing protein;PRP38_assoc domain-containing protein;Pre-mRNA-splicing factor 38
11.7753	11.8032	12.6486	12.3657	11.9497	11.9129	12.2814	12.0182	12.9833	12.8083	12.6513	13.3628	13.1896	13.2264	12.4995	12.3543	M1C6B2	PRP38_assoc domain-containing protein;PRP38_assoc domain-containing protein;Pre-mRNA-splicing factor 38
11.7753	11.8032	12.6486	12.3657	11.9497	11.9129	12.2814	12.0182	12.9833	12.8083	12.6513	13.3628	13.1896	13.2264	12.4995	12.3543	M1C6B3	PRP38_assoc domain-containing protein;PRP38_assoc domain-containing protein;Pre-mRNA-splicing factor 38
11.7753	11.8032	12.6486	12.3657	11.9497	11.9129	12.2814	12.0182	12.9833	12.8083	12.6513	13.3628	13.1896	13.2264	12.4995	12.3543	M1C6B4	PRP38_assoc domain-containing protein;PRP38_assoc domain-containing protein;Pre-mRNA-splicing factor 38
10.3551	9.64971	10.3729	10.1485	9.7979	10.6028	10.3244	10.8172	10.9278	11.2401	10.7978	11.3263	11.1557	10.9157	10.3613	10.8444	M1C6I1	Casein kinase
9.82155	7.39478	9.98385	10.06	10.4549	11.0395	10.4938	10.5198	11.2877	10.6451	10.5472	9.92967	10.2734	11.1288	10.9955	10.6805	M1C6J2	Ubiquitin-protein ligase
12.9402	13.4669	13.6358	12.9395	13.1785	13.9651	14.5934	14.1641	12.886	13.1994	13.1833	13.5214	13.7019	13.6644	13.5189	14.0084	M1C6W8	Mitogen-activated protein kinase kinase kinase
9.45018	10.3639	9.54844	11.9556	10.2265	10.3414	11.8824	9.74341	10.9757	13.4051	10.0961	10.1405	10.0502	13.5516	14.0037	13.5039	M1C748	Phosphatidylinositol 4-phosphate 5-kinase
13.0299	13.3032	13.2141	9.3289	13.1821	10.3545	13.4762	13.2895	13.8405	13.7955	13.9658	13.6569	14.0518	13.8665	13.8342	14.1135	M1C748	Phosphatidylinositol 4-phosphate 5-kinase
13.0544	14.1077	14.1215	14.2676	12.6309	14.4917	10.3486	13.0838	14.5602	14.9746	14.6036	14.5942	14.9254	15.1836	15.0753	15.0362	M1C7B4	DNA binding protein
13.0544	14.1077	14.1215	14.2676	12.6309	14.4917	10.9535	13.0838	14.5602	14.9746	14.6036	14.5942	14.9254	15.1836	15.0753	15.0362	M1C7B5	DNA binding protein
15.0049	15.0521	15.2354	15.0587	14.7624	14.1252	15.1139	14.2353	13.6274	13.9898	13.739	13.9129	12.9605	9.78424	12.7316	13.2138	M1C7K4	UDP-glucuronic acid decarboxylase 1 isoform 2
13.1038	13.5827	13.3465	10.8851	13.6333	13.7062	10.5704	13.7635	12.6835	12.91	9.2302	12.7394	10.4768	12.5665	10.4924	9.83827	M1C7L2	Phosphatidate phosphatase
13.1038	13.5827	13.3465	10.3986	13.6333	13.7062	10.3053	13.7635	12.6835	12.91	10.4427	12.7394	11.3539	12.5665	10.4206	10.8812	M1C7L3	Phosphatidate phosphatase
13.1038	13.5827	13.3465	9.08289	13.6333	13.7062	10.237	13.7635	12.6835	12.91	10.5746	12.7394	10.2795	12.5665	10.0412	10.7498	M1C7L4	Phosphatidate phosphatase
13.1038	13.5827	13.3465	10.1688	13.6333	13.7062	10.4795	13.7635	12.6835	12.91	10.0835	12.7394	10.8679	12.5665	10.9089	11.7424	M1C7L5	Phosphatidate phosphatase
11.1073	10.6063	10.569	9.46785	9.51726	10.2106	9.85896	13.8044	10.0392	13.6343	11.1415	13.9119	14.1301	14.1649	10.2988	14.3791	M1C7U4	Trehalose-6-phosphate synthase
13.656	13.7919	13.9091	13.5663	13.3807	14.0187	14.1827	14.2859	13.8853	14.2191	14.139	14.3828	14.0045	14.3072	13.9332	14.3496	M1C7V2	YTH domain-containing protein
13.656	13.7919	13.9091	13.5663	13.3807	14.0187	14.1827	14.2859	13.8853	14.2191	14.139	14.3828	14.0045	14.3072	13.9332	14.3496	M1C7V3	YTH domain-containing protein
10.4961	11.2438	11.8998	9.59678	10.071	11.3145	11.8612	11.8547	12.4407	12.7761	12.7731	13.1863	12.7337	12.8314	12.5627	12.6978	M1C7W6	Map3k delta-1 protein kinase
8.8348	11.2438	11.8998	9.70501	9.52145	10.9409	11.8612	11.8547	12.4407	12.7761	12.7731	13.1863	12.7337	12.8314	12.5627	12.6978	M1C7W7	Map3k delta-1 protein kinase
10.5242	11.2438	11.8998	10.2296	10.4022	9.51101	11.8612	11.8547	12.4407	12.7761	12.7731	13.1863	12.7337	12.8314	12.5627	12.6978	M1C7W8	Map3k delta-1 protein kinase
15.8616	16.3408	16.5122	16.2527	15.9416	16.5088	16.8724	16.6561	15.1815	15.4677	15.4888	15.6526	16.0872	16.038	16.0534	16.1418	M1C800	NPL4 family protein
14.8098	14.3476	15.2397	14.5384	14.5043	15.5984	9.81483	16.001	14.1638	14.6174	15.0234	15.2232	15.9302	16.2946	15.3655	16.7033	M1C8J9	Ribulose bisphosphate carboxylase small chain
14.8098	14.3476	15.2397	14.5384	14.5043	15.5984	9.81483	16.001	14.1638	14.6174	15.0234	15.2232	15.9302	16.2946	15.3655	16.7033	M1C8J9	Ribulose bisphosphate carboxylase small chain
19.0828	19.0217	19.1403	18.3643	18.5306	18.9435	18.7771	18.7389	19.0334	18.7353	18.9044	19.3264	19.4903	19.4324	19.3949	19.6514	M1C8R4	Uncharacterized protein
19.0828	19.0217	19.1403	18.3643	18.5306	18.9435	18.7771	18.7389	19.0334	18.7353	18.9044	19.3264	19.4903	19.4324	19.3949	19.6514	M1C8R5	Uncharacterized protein
9.92719	12.3112	10.9526	10.5645	11.4835	11.0738	9.94769	12.539	12.5253	12.4386	9.65967	12.2378	12.2695	12.8171	10.9314	12.2144	M1C8S7	Phosphoglucomutase
9.24365	12.3112	10.4096	11.444	11.4835	10.9399	10.6647	12.539	12.5253	12.4386	10.3159	12.2378	12.2695	12.8171	10.5548	12.2144	M1C8S8	Phosphoglucomutase
12.0207	12.5558	12.8079	11.4623	12.3149	12.2308	12.8512	13.084	12.85	13.0365	12.9351	13.1007	13.1455	13.3049	13.0368	12.9441	M1C972	Zinc finger CCCH domain-containing protein 13
12.0207	12.5558	12.8079	11.4623	12.3149	12.2308	12.8512	13.084	12.85	13.0365	12.9351	13.1007	13.1455	13.3049	13.0368	12.9441	M1C972	Zinc finger CCCH domain-containing protein 13
14.0062	13.9483	14.1651	14.0451	14.0212	14.2585	14.5907	14.3671	14.2898	14.6433	14.6359	14.8378	14.8814	14.6504	14.6085	14.6395	M1C972	Zinc finger CCCH domain-containing protein 13
9.61197	10.1471	10.4169	9.83714	11.0415	9.74006	10.3299	10.316	13.6426	10.4311	10.3306	14.3238	11.1175	14.1487	13.8718	14.1704	M1C972	Zinc finger CCCH domain-containing protein 13
15.1052	15.2958	15.3812	15.2142	14.9794	15.1485	15.3768	15.4145	15.3544	15.6458	15.4375	15.7276	15.4958	15.5345	15.4523	15.5892	M1C9A0	RNA recognition motif (RRM)-containing protein
12.3649	13.017	12.2742	13.2476	11.592	13.2431	12.2658	13.1656	12.74	13.4498	10.6232	12.4365	12.191	13.6171	12.9752	13.6643	M1C9A0	RNA recognition motif (RRM)-containing protein
10.6239	11.4181	11.6464	9.21235	11.7248	11.5757	11.2141	11.7967	10.2147	10.2684	10.1946	8.88239	10.5003	10.9629	9.42543	9.42745	M1C9A0	RNA recognition motif (RRM)-containing protein
10.6239	11.4181	11.6464	9.21235	11.7248	11.5757	11.2141	11.7967	10.2147	10.2684	10.1946	8.88239	10.5003	10.9629	9.42543	9.42745	M1C9A0	RNA recognition motif (RRM)-containing protein
12.4582	12.7384	13.041	13.2343	12.3956	13.2765	12.3443	12.4749	13.1651	13.8108	13.5326	13.4607	13.1811	13.5461	13.1733	13.1993	M1C9L1	tRNA ligase
14.5513	14.834	14.9156	14.9079	14.347	14.8347	15.029	14.9118	15.667	16.0019	15.8103	16.1085	16.113	16.1136	16.0623	16.1634	M1C9S1	BAH domain-containing protein
14.5513	14.834	14.9156	14.9079	14.347	14.8347	15.029	14.9118	15.667	16.0019	15.8103	16.1085	16.113	16.1136	16.0623	16.1634	M1C9S2	BAH domain-containing protein
12.6521	12.4891	12.7097	12.9615	12.096	12.6697	12.5908	12.8368	12.4323	12.8708	12.7	13.1391	11.4978	12.0421	11.8959	12.0508	M1C9V3	Kinesin light chain
12.6521	12.4891	12.7097	12.9615	12.096	12.6697	12.5908	12.8368	12.4323	12.8708	12.7	13.1391	11.4978	12.0421	11.8959	12.0508	M1C9V4	Kinesin light chain
11.5407	11.6963	11.9498	11.2787	10.8017	11.9914	10.8721	12.4431	10.462	9.9312	10.2859	9.31537	10.7522	10.7212	12.1324	11.0004	M1C9W1	Uncharacterized protein
22.745	22.8785	22.9451	23.0113	22.4032	22.8882	22.9398	22.9529	22.4995	22.6226	22.6133	22.8129	22.8678	22.8905	22.6496	22.8568	M1C9W6	Extracellular Ca2+ sensing receptor
22.5034	22.698	22.7648	22.8909	21.9368	22.5286	22.5944	22.6217	22.7333	22.901	22.8206	23.0192	22.9569	23.013	22.8536	23.0496	M1C9W6	Extracellular Ca2+ sensing receptor
21.8462	22.1163	22.1258	21.5126	21.8404	22.2987	22.4771	22.5861	22.1269	22.0745	21.9896	22.2736	22.4369	22.3534	22.1934	22.4566	M1C9W6	Extracellular Ca2+ sensing receptor
21.8462	22.1163	22.1258	21.5126	21.8404	22.2987	22.4771	22.5861	22.1269	22.0745	21.9896	22.2736	22.4369	22.3534	22.1934	22.4566	M1C9W6	Extracellular Ca2+ sensing receptor
21.4867	21.8679	21.9384	21.9381	21.114	21.7146	22.1141	22.0537	21.3692	21.7769	21.7046	21.9887	21.5064	21.5884	21.3523	21.662	M1CA88	Mannose-1-phosphate guanyltransferase
21.4867	21.8679	21.9384	21.9381	21.114	21.7146	22.1141	22.0537	21.3692	21.7769	21.7046	21.9887	21.5064	21.5884	21.3523	21.662	M1CA89	Mannose-1-phosphate guanyltransferase
10.3364	16.3686	17.9151	17.9411	16.8395	19.1111	19.1963	19.2337	17.45	16.68	11.2188	16.4107	17.9683	16.7275	16.3439	18.0441	M1CAH6	Uncharacterized protein
16.7097	17.1143	15.1345	10.8105	10.2042	18.2248	18.1982	9.30118	9.58422	9.88019	16.8209	10.2488	16.8964	17.095	16.8145	16.9658	M1CAH6	Uncharacterized protein
11.4072	10.2014	10.9739	8.48441	10.245	9.02259	10.86	10.2016	9.06542	12.2116	11.043	11.729	12.085	11.7268	11.6995	12.1198	M1CAI2	Presenilin
16.0241	16.2353	16.4236	16.4447	15.8992	16.3726	16.5434	16.4367	15.3912	15.8809	11.032	15.9951	15.9458	15.9424	15.8406	16.0564	M1CAR8	Acyl-CoA binding protein
16.1534	16.4918	16.6374	16.4289	15.6978	16.4672	16.5379	16.4923	16.5575	16.9117	16.7123	17.0338	17.3432	17.3154	17.1255	17.3167	M1CAV4	WD-repeat protein
16.1534	16.4918	16.6374	16.4289	15.6978	16.4672	16.5379	16.4923	16.5575	16.9117	16.7123	17.0338	17.3432	17.3154	17.1255	17.3167	M1CAV5	WD-repeat protein
13.091	13.4097	13.5596	13.0108	12.8611	13.478	11.2026	13.5606	13.4158	13.8831	13.6865	14.1459	14.0371	14.2423	13.7566	14.1349	M1CAV4	WD-repeat protein
13.091	13.4097	13.5596	13.0108	12.8611	13.478	10.1058	13.5606	13.4158	13.8831	13.6865	14.1459	14.0371	14.2423	13.7566	14.1349	M1CAV5	WD-repeat protein
16.1639	16.5085	16.552	16.0327	15.667	16.2015	16.7724	16.5226	16.1427	16.6417	16.4901	17.0068	16.6448	16.6249	16.5034	16.9485	M1CB94	Zinc finger CCCH domain-containing protein 55
16.1639	16.5085	16.552	16.0327	15.667	16.2015	16.7724	16.5226	16.1427	16.6417	16.4901	17.0068	16.6448	16.6249	16.5034	16.9485	M1CB95	Zinc finger CCCH domain-containing protein 55
14.8444	13.745	15.189	15.1201	14.8455	15.5678	14.0537	15.9123	15.0024	15.7511	15.5441	15.9405	15.4394	16.0634	15.8796	15.4048	M1CB94	Zinc finger CCCH domain-containing protein 55
14.8444	13.745	15.189	15.1201	14.8455	15.5678	14.0537	15.9123	15.0024	15.7511	15.5441	15.9405	15.4394	16.0634	15.8796	15.4048	M1CB95	Zinc finger CCCH domain-containing protein 55
13.4385	13.879	14.009	13.4913	13.2905	14.1779	13.8448	13.6422	13.4486	14.3315	14.3123	14.5164	13.876	13.8713	14.2485	14.7133	M1CB94	Zinc finger CCCH domain-containing protein 55
13.4385	13.879	14.009	13.4913	13.2905	14.1779	13.8448	13.6422	13.4486	14.3315	14.3123	14.5164	13.876	13.8713	14.2485	14.7133	M1CB95	Zinc finger CCCH domain-containing protein 55
12.3103	9.37289	12.5959	11.4041	9.5709	12.1776	9.72343	12.5731	11.6506	11.7712	10.4196	12.2887	10.9481	10.0045	10.7192	11.9101	M1CBF6	40S ribosomal protein S2
12.3103	9.79412	12.5959	11.4041	10.206	12.1776	10.5874	12.5731	11.6506	11.7712	8.7289	12.2887	10.5998	11.5756	9.67223	11.9101	M1D1B2	40S ribosomal protein S2
14.2236	14.6429	14.5882	14.095	14.3554	14.7768	15.0036	14.7853	13.4623	14.0857	13.6724	13.72	13.5867	13.8704	10.2063	13.6804	M1CBG2	Uncharacterized protein
13.4313	13.8548	14.1524	13.6827	13.5889	14.1691	14.3703	14.4239	13.7618	14.0855	13.9946	14.9513	14.3456	14.3074	14.1479	14.8164	M1CBH1	Suppressor of ty
14.6955	14.7748	15.1283	13.5374	14.6089	14.903	15.9112	15.5269	14.5306	14.701	14.7793	15.1166	14.9124	14.9217	14.7841	15.2852	M1CBM3	Membrane attack complex component/perforin/complement C9
11.7123	12.3367	12.13	10.1124	10.2836	12.2123	12.364	10.4177	12.0944	12.0916	10.3012	10.9513	11.905	12.2793	10.7606	12.3994	M1CBM3	Membrane attack complex component/perforin/complement C9
12.2544	12.697	12.5412	12.4234	10.2184	12.5961	12.9373	12.7483	12.5727	13.0361	12.7848	13.0271	13.1062	13.1398	12.9882	13.0832	M1CBR3	Uncharacterized protein
14.7406	15.7914	15.8731	15.4869	13.9461	15.4977	14.9728	15.7078	14.1259	14.0325	13.278	15.0571	15.0214	14.614	15.0035	14.2363	M1CBR7	Coatomer subunit delta
14.7406	15.7914	15.8731	15.4869	13.9461	15.4977	14.9728	15.7078	14.1259	14.0325	13.278	15.0571	15.0214	14.614	15.0035	14.2363	M1CBR8	Coatomer subunit delta
10.3543	10.5818	10.8823	9.27634	10.5495	10.9213	11.159	9.48473	10.1925	9.54527	10.6756	11.2912	11.3893	11.6192	10.1329	11.1288	M1CC34	Metal transporter
9.39495	10.9505	10.8823	9.27634	10.5495	10.8762	10.9172	11.1174	11.0942	11.5374	10.6756	9.72869	11.3893	11.6192	11.1454	11.1288	M1CC35	Metal transporter
12.1139	12.3634	12.7441	10.053	11.838	12.5938	10.4388	9.88011	10.6551	11.7468	11.8608	10.6622	11.7821	12.0169	10.9915	12.0205	M1CCA9	NAD(P)H dehydrogenase (quinone)
12.1139	12.3634	12.7441	9.87248	11.838	12.5938	10.6198	9.41471	10.2568	11.7468	11.8608	11.1773	11.7821	12.0169	9.49713	12.0205	M1CCB0	NAD(P)H dehydrogenase (quinone)
19.0054	19.3339	19.3794	19.3466	18.6921	19.1956	19.4235	19.378	19.0057	19.373	19.1737	19.3912	19.2115	19.382	19.1148	19.3511	M1CCB4	Usp domain-containing protein
14.666	14.5589	15.6471	14.8046	14.0791	14.5065	15.4628	14.6139	13.3269	13.6928	14.3905	14.0455	13.743	13.8899	13.6581	13.8415	M1CCE6	TRANSPARENT TESTA 12 protein
12.6622	13.3327	12.7365	9.51073	11.7466	11.5247	12.3008	12.4472	11.9834	11.268	11.454	11.3544	11.9802	11.1822	11.0439	12.1701	M1CCE6	TRANSPARENT TESTA 12 protein
12.6622	13.3327	12.7365	9.51073	11.7466	11.5247	12.3008	12.4472	11.9834	11.268	11.454	11.3544	11.9802	11.1822	11.0439	12.1701	M1CCE6	TRANSPARENT TESTA 12 protein
14.6691	14.7945	14.3003	11.2811	13.8995	11.2724	14.486	14.787	14.9141	15.1693	15.2273	15.3682	15.0717	15.0437	14.9892	15.3697	M1CCF7	Inositol-1,4,5-triphosphate-5-phosphatase;Inositol-1,4,5-triphosphate-5-phosphatase
14.6691	14.7945	14.3003	11.2811	13.8995	11.2724	14.486	14.787	14.9141	15.1693	15.2273	15.3682	15.0717	15.0437	14.9892	15.3697	M1CCF8	Inositol-1,4,5-triphosphate-5-phosphatase;Inositol-1,4,5-triphosphate-5-phosphatase
11.1339	14.7199	14.243	8.28149	13.8257	9.22021	14.4343	14.7054	14.8585	15.0883	10.0589	15.3018	15.0206	15.0184	14.938	15.3016	M1CCF7	Inositol-1,4,5-triphosphate-5-phosphatase;Inositol-1,4,5-triphosphate-5-phosphatase
9.57189	14.7199	14.243	10.369	13.8257	10.006	14.4343	14.7054	14.8585	15.0883	11.1257	15.3018	15.0206	15.0184	14.938	15.3016	M1CCF8	Inositol-1,4,5-triphosphate-5-phosphatase;Inositol-1,4,5-triphosphate-5-phosphatase
14.2635	14.6738	14.8565	14.8086	13.9914	14.6716	15.0498	14.7582	14.6246	14.9751	15.1029	15.3267	15.2424	15.2451	15.009	15.3622	M1CCF7	Inositol-1,4,5-triphosphate-5-phosphatase;Inositol-1,4,5-triphosphate-5-phosphatase
14.2635	14.6738	14.8565	14.8086	13.9914	14.6716	15.0498	14.7582	14.6246	14.9751	15.1029	15.3267	15.2424	15.2451	15.009	15.3622	M1CCF8	Inositol-1,4,5-triphosphate-5-phosphatase;Inositol-1,4,5-triphosphate-5-phosphatase
[truncated: 641 more rows]

## Sheet: Sig GI vs GC
GC1	GC2	GC3	GC4	GI1	GI2	GI3	GI4	IC1	IC2	IC3	IC4	II1	II2	II3	II4	Student's T-test Significant GI_GC	Student's T-test significant	-Log Student's T-test p-value GI_GC	FC	Student's T-test Test statistic GI_GC	Protein Id	Protein Descriptions
9.97845	9.77136	9.85061	14.8429	14.773	15.5891	16.0694	15.8427	17.0187	17.5373	17.4004	17.817	17.5941	17.7772	17.3313	17.8113	+	GI_GC	1.88779	4.45771	3.49222	J9ULI1	Osmotic stress-activated protein kinase
9.89915	10.1125	11.4492	9.61503	13.8204	13.9042	14.2382	14.13	10.5337	10.9591	10.7115	10.0288	10.6091	13.6205	11.2687	10.1056	+	GI_GC	3.97379	3.75425	8.98568	M0ZG82	Chromatin remodeling complex subunit
12.5194	12.63	13.0113	10.4235	9.2446	10.51	11.0597	9.80751	12.5729	13.0719	13.0045	13.1356	10.945	10.1363	10.757	10.2313	+	GI_GC	1.51719	-1.99058	-2.81896	M0ZGI4	Diacylglycerol O-acyltransferase
12.5194	12.63	13.0113	10.4692	10.0575	10.4445	10.252	10.765	12.5729	13.0719	13.0045	13.1356	11.3198	10.6639	10.8677	10.3306	+	GI_GC	1.62113	-1.7777	-3.00266	M0ZGI7	Diacylglycerol O-acyltransferase
13.373	13.8584	10.3846	11.7839	8.61018	9.33741	10.2847	9.41874	14.048	13.5983	13.2772	13.8077	13.3959	13.9015	13.8337	14.0961	+	GI_GC	1.84285	-2.93721	-3.40766	M0ZHP1	GAMYB-binding protein
9.23774	9.3912	9.693	10.0224	12.452	13.1323	13.5206	13.3723	14.8221	15.1022	14.9967	15.4391	15.3986	15.2391	15.0331	15.3307	+	GI_GC	4.7029	3.53321	12.0505	M0ZIQ4	Pseudo-response regulator 5
9.23774	9.3912	9.693	10.0224	12.452	13.1323	13.5206	13.3723	14.8221	15.1022	14.9967	15.4391	15.3986	15.2391	15.0331	15.3307	+	GI_GC	4.7029	3.53321	12.0505	M0ZIQ5	Pseudo-response regulator 5
10.4731	11.6589	10.2888	11.154	11.7245	12.048	12.3036	12.5885	11.4846	13.4197	12.0549	11.7135	11.1651	13.7241	13.0759	12.321	+	GI_GC	1.8825	1.27244	3.48222	M0ZIV9	TPR_REGION domain-containing protein
13.1368	13.9822	13.9693	13.536	13.0927	13.2181	12.9496	13.1439	13.6365	14.0412	13.8387	13.9068	12.9175	13.4754	12.9602	13.2796	+	GI_GC	1.41889	-0.555012	-2.64827	M0ZJN5	Serine-threonine protein kinase, plant-type
10.1199	9.96471	10.7196	9.631	10.6417	10.6532	10.6084	11.0794	11.7678	11.7909	11.6322	11.8063	11.9708	11.6484	11.8691	11.1739	+	GI_GC	1.3389	0.636873	2.51127	M0ZKU3	Zinc knuckle (CCHC-type) family protein
12.4341	12.7315	13.0952	12.8811	9.89294	11.4799	11.5888	9.80159	11.1969	11.7675	11.0805	10.8254	10.6655	10.2824	9.96187	10.4328	+	GI_GC	2.211	-2.09465	-4.12931	M0ZLE5	Inositol hexakisphosphate and diphosphoinositol-pentakisphosphate kinase
9.95273	10.5699	14.3685	9.60457	14.1787	14.995	15.1471	14.9811	11.8909	9.67443	14.2484	10.2784	14.8696	8.96954	11.8393	14.9525	+	GI_GC	1.78547	3.70157	3.30097	M0ZLE5	Inositol hexakisphosphate and diphosphoinositol-pentakisphosphate kinase
13.9542	14.8146	12.6498	13.6501	9.24585	9.13093	11.9825	10.3701	15.1949	14.936	14.142	13.6386	13.2579	15.0237	14.8578	14.8089	+	GI_GC	2.38176	-3.58484	-4.48912	M0ZM13	Pro-resilin
17.0918	17.1756	16.9122	16.5253	15.8548	12.1604	13.5495	15.7024	17.378	17.0568	17.2582	17.739	17.7563	17.5379	17.5761	17.9384	+	GI_GC	1.55837	-2.60947	-2.89132	M0ZMN4	High mobility group protein
15.2329	15.4079	14.6877	13.8467	13.4605	11.8093	10.8725	13.36	16.4156	15.6938	16.1418	16.4684	16.7798	16.2359	16.3241	16.5839	+	GI_GC	1.81901	-2.41826	-3.36316	M0ZMN4	High mobility group protein
15.2329	15.4079	14.6877	13.8467	13.4605	11.8093	10.8725	13.36	16.4156	15.6938	16.1418	16.4684	16.7798	16.2359	16.3241	16.5839	+	GI_GC	1.81901	-2.41826	-3.36316	M0ZMN4	High mobility group protein
20.8489	21.0905	21.1971	21.3135	20.3001	20.8308	20.5965	20.5728	20.1393	20.567	20.2505	20.2649	19.4974	20.0276	19.6326	19.5102	+	GI_GC	1.97457	-0.537463	-3.65813	M0ZP30	Pyruvate dehydrogenase E1 component subunit alpha;Pyruvate dehydrogenase E1 component subunit alpha, mitochondrial
20.8489	21.0905	21.1971	21.3135	20.3001	20.8308	20.5965	20.5728	20.1393	20.567	20.2505	20.2649	19.4974	20.0276	19.6326	19.5102	+	GI_GC	1.97457	-0.537463	-3.65813	P52903	Pyruvate dehydrogenase E1 component subunit alpha;Pyruvate dehydrogenase E1 component subunit alpha, mitochondrial
13.0052	10.0481	10.7821	10.2898	13.0591	13.3076	13.517	13.8602	14.2437	10.4637	14.324	14.6268	14.5978	10.6437	14.6457	14.89	+	GI_GC	1.86698	2.40468	3.45296	M0ZPH6	BZIP transcription factor bZIP114
13.0052	10.915	11.3492	11.2042	13.0591	13.3076	13.517	13.8602	14.2437	10.5276	14.324	14.6268	14.5978	11.1568	14.6457	14.89	+	GI_GC	1.96047	1.81756	3.63093	M0ZPH6	BZIP transcription factor bZIP114
13.0052	10.5393	9.37186	9.73805	13.0591	13.3076	13.517	13.8602	14.2437	10.3415	14.324	14.6268	14.5978	10.7915	14.6457	14.89	+	GI_GC	1.79566	2.77237	3.3198	M0ZPH7	BZIP transcription factor bZIP114
13.0052	11.1023	9.40506	9.84226	13.0591	13.3076	13.517	13.8602	14.2437	11.4853	14.324	14.6268	14.5978	11.501	14.6457	14.89	+	GI_GC	1.7032	2.59727	3.15034	M0ZPH7	BZIP transcription factor bZIP114
22.7326	22.9518	22.9368	22.8499	21.8836	22.1971	22.3936	22.4899	23.0508	23.3348	23.1486	23.3008	23.4715	23.6659	23.6042	23.6927	+	GI_GC	2.33253	-0.626739	-4.38357	M0ZPZ4	PTAC16
14.5064	14.735	14.5338	14.4851	13.5658	13.7055	14.1297	14.2443	15.0057	15.3256	15.0798	15.1522	15.5935	15.8721	15.7268	15.7962	+	GI_GC	2.03421	-0.653739	-3.77424	M0ZPZ4	PTAC16
14.5064	14.735	14.5338	14.4851	13.5658	13.7055	14.1297	14.2443	15.0057	15.3256	15.0798	15.1522	15.5935	15.8721	15.7268	15.7962	+	GI_GC	2.03421	-0.653739	-3.77424	M0ZPZ4	PTAC16
14.5064	14.735	14.5338	14.4851	13.5658	13.7055	14.1297	14.2443	15.0057	15.3256	15.0798	15.1522	15.5935	15.8721	15.7268	15.7962	+	GI_GC	2.03421	-0.653739	-3.77424	M0ZPZ4	PTAC16
12.7427	12.7112	12.951	12.7022	10.5682	10.2365	11.7984	11.9274	13.3185	14.0085	13.3239	13.5168	13.6373	13.9374	13.8749	13.5661	+	GI_GC	2.05103	-1.64416	-3.80731	M0ZPZ4	PTAC16
13.9137	14.0533	14.1981	14.0146	14.1402	14.3932	14.6002	14.7086	13.5552	9.89378	13.5921	13.7386	13.5112	13.9433	13.3907	13.8626	+	GI_GC	1.62126	0.415596	3.00289	M0ZRQ5	Casein kinase
13.9137	14.0533	14.1981	14.0146	14.1402	14.3932	14.6002	14.7086	13.5552	10.2657	13.5921	13.7386	13.5112	13.9433	13.3907	13.8626	+	GI_GC	1.62126	0.415596	3.00289	M0ZRQ6	Casein kinase
14.084	13.8315	15.2532	15.1771	13.0131	13.2561	13.3118	13.066	13.7918	14.1028	13.7647	14.0815	12.9456	13.4695	12.6077	12.857	+	GI_GC	2.05209	-1.42471	-3.80941	M0ZRY1	Harpin-induced protein
14.3098	14.6712	14.7163	14.4679	14.5993	15.4131	15.8795	15.625	15.2391	15.5312	15.5901	15.7339	16.2113	16.5436	16.1344	16.4691	+	GI_GC	1.5434	0.837945	2.86495	M0ZSE9	Uncharacterized protein
14.3098	14.6712	14.7163	14.4679	14.5993	15.4131	15.8795	15.625	15.2391	15.5312	15.5901	15.7339	16.2113	16.5436	16.1344	16.4691	+	GI_GC	1.5434	0.837945	2.86495	M0ZSF0	Uncharacterized protein
14.3098	14.6712	14.7163	14.4679	14.5993	15.4131	15.8795	15.625	15.2391	15.5312	15.5901	15.7339	16.2113	16.5436	16.1344	16.4691	+	GI_GC	1.5434	0.837945	2.86495	M0ZSF1	Uncharacterized protein
14.3098	14.6712	14.7163	14.4679	14.5993	15.4131	15.8795	15.625	15.2391	15.5312	15.5901	15.7339	16.2113	16.5436	16.1344	16.4691	+	GI_GC	1.5434	0.837945	2.86495	M0ZSF2	Uncharacterized protein
14.7236	14.7129	13.8705	11.5689	12.3921	10.7065	11.0072	11.7506	14.7901	13.5023	14.2044	14.4033	14.5022	13.8444	14.2945	14.9208	+	GI_GC	1.4489	-2.25489	-2.7001	M0ZSL3	Calreticulin
19.9142	20.243	20.2043	19.6845	19.0025	19.4281	19.7013	19.6577	19.4986	19.9581	19.5939	20.1325	19.3706	19.5001	19.5499	19.7383	+	GI_GC	1.46335	-0.564106	-2.72514	M0ZST5	Eukaryotic translation initiation factor 5A;Eukaryotic translation initiation factor 5A-4
19.9142	20.243	20.2043	19.6845	19.0025	19.4281	19.7013	19.6577	19.4986	19.9581	19.5939	20.1325	19.3706	19.5001	19.5499	19.7383	+	GI_GC	1.46335	-0.564106	-2.72514	P56336	Eukaryotic translation initiation factor 5A;Eukaryotic translation initiation factor 5A-4
13.359	13.8078	13.8656	13.7505	11.8464	9.80971	10.6399	10.2759	13.2099	10.1191	13.5734	13.6626	9.74392	11.0427	13.5718	11.1295	+	GI_GC	3.29708	-3.05277	-6.77689	M0ZT89	Chaperonin 21
10.2483	11.7691	11.4739	14.9939	14.6069	14.6453	14.8826	14.925	11.1081	15.2366	14.9793	15.2715	15.0615	14.9397	11.226	15.0331	+	GI_GC	1.3923	2.64366	2.60256	M0ZTH0	Uncharacterized protein
14.2586	14.4502	14.4212	14.6558	13.9612	14.1241	14.3126	14.1566	11.2046	10.2199	14.9316	10.3067	12.4103	10.5344	14.5674	10.8205	+	GI_GC	1.52314	-0.307824	-2.82939	M0ZTH0	Uncharacterized protein
11.3062	9.88709	13.4381	10.5194	13.9325	14.4843	14.5876	14.7925	13.3936	13.9641	13.6147	10.1978	9.95897	14.1922	11.1172	14.0296	+	GI_GC	2.1364	3.16153	3.97742	M0ZTV9	Cell wall protein TIR4
18.0628	18.2641	18.5502	18.3338	18.4553	18.6491	18.8588	18.8222	18.1387	18.4504	18.2953	18.4929	18.4342	18.3216	18.2369	18.3588	+	GI_GC	1.55333	0.39364	2.88243	M0ZU86	Nucleic acid binding protein
12.89	13.4732	13.2838	13.0257	12.6044	9.74622	9.7339	10.9912	11.6402	12.476	13.7219	14.2202	9.9651	10.3336	9.97925	12.815	+	GI_GC	1.87553	-2.39923	-3.46907	M0ZUD6	Phosphoesterase
12.89	13.4732	13.2838	13.0257	12.6044	10.9444	11.0943	10.0282	11.2386	12.476	13.7219	14.2202	11.6753	9.57388	10.1557	12.815	+	GI_GC	1.9657	-2.00033	-3.64101	M0ZUD8	Phosphoesterase
12.89	13.4732	13.2838	13.0257	12.6044	10.3609	11.0821	10.1275	9.99569	12.476	13.7219	14.2202	10.9259	10.5402	10.4676	12.815	+	GI_GC	1.99836	-2.12443	-3.70424	M0ZUD9	Phosphoesterase
12.1666	12.4012	12.6292	12.4455	12.5517	12.877	13.1373	13.0505	12.6715	13.1727	12.9494	13.1855	13.1498	13.0088	12.8803	12.9878	+	GI_GC	1.66081	0.493527	3.07375	M0ZUQ1	RNA binding protein
12.1666	12.4012	12.6292	12.4455	12.5517	12.877	13.1373	13.0505	12.6715	13.1727	12.9494	13.1855	13.1498	13.0088	12.8803	12.9878	+	GI_GC	1.66081	0.493527	3.07375	M0ZUQ3	RNA binding protein
12.1666	12.4012	12.6292	12.4455	12.5517	12.877	13.1373	13.0505	12.6715	13.1727	12.9494	13.1855	13.1498	13.0088	12.8803	12.9878	+	GI_GC	1.66081	0.493527	3.07375	M0ZUQ4	RNA binding protein
18.0474	18.3388	18.4376	18.0292	18.3393	18.7327	18.8796	18.8547	17.9994	18.4091	18.1414	18.3111	19.0362	19.2514	18.9915	19.2308	+	GI_GC	1.62795	0.488367	3.01483	M0ZWJ3	Sugar transporter ERD6-like 6
15.5794	15.99	16.1225	15.7787	15.9178	16.3702	16.7216	16.7048	15.9774	16.4132	16.1771	16.4065	16.668	16.7835	16.6472	16.7983	+	GI_GC	1.34051	0.56093	2.514	M0ZWY9	Synapse-associated protein
14.7871	15.1692	15.2752	15.2577	12.9786	13.966	14.8259	14.1237	13.8558	13.5337	14.5688	14.8528	13.4324	11.7712	12.9817	13.7068	+	GI_GC	1.55792	-1.14876	-2.89053	M0ZXA6	Triose phosphate/phosphate translocator, chloroplast
10.4264	9.98094	10.3358	9.75297	11.2614	12.1714	12.181	12.7819	10.6439	10.3226	10.1834	10.7559	11.4415	12.0661	11.1956	11.9569	+	GI_GC	2.8735	1.9749	5.63424	M0ZXT6	Uncharacterized protein
15.1122	15.4194	15.4188	14.5408	14.6277	14.6132	14.5129	14.6329	15.1341	14.7907	15.1669	15.5405	14.946	15.2112	14.891	15.8221	+	GI_GC	1.34271	-0.526109	-2.51775	M0ZYU5	Oligopeptide transporter
10.1288	10.1735	10.9876	10.5378	10.9802	13.4252	13.6106	13.149	13.2917	9.33452	13.3266	13.5842	13.6552	13.4284	13.3551	9.89046	+	GI_GC	1.96101	2.33434	3.63196	M0ZZA3	Protein kinase 1b
12.3884	12.649	12.354	12.4234	12.8688	12.9816	13.2933	13.2694	12.122	12.1407	11.8528	12.1685	11.9226	11.9326	11.7314	11.8427	+	GI_GC	2.69862	0.649563	5.20679	M1A1V7	Inorganic diphosphatase;Soluble inorganic pyrophosphatase PPA1
12.3884	12.649	12.354	12.4234	12.8688	12.9816	13.2933	13.2694	12.122	12.1407	11.8528	12.1685	11.9226	11.9326	11.7314	11.8427	+	GI_GC	2.69862	0.649563	5.20679	Q43187	Inorganic diphosphatase;Soluble inorganic pyrophosphatase PPA1
10.1711	9.8428	11.0706	9.80782	11.3539	11.8191	11.8213	11.8543	10.898	10.6017	10.9107	10.7041	11.4751	11.4042	10.7571	10.9634	+	GI_GC	2.47335	1.48907	4.68956	M1A2E4	GYF domain-containing protein
9.31073	9.63581	10.6172	10.261	11.3539	11.8191	11.8213	11.8543	10.3151	10.4109	10.7053	11.3433	11.4751	11.4042	10.5804	10.321	+	GI_GC	2.8216	1.75597	5.50489	M1A2E5	GYF domain-containing protein
12.4385	12.7926	12.8173	12.8005	10.1752	11.9183	9.1828	9.50326	12.5033	10.9716	12.3015	10.2202	12.3868	12.5744	12.3888	12.8978	+	GI_GC	2.18583	-2.51735	-4.07772	M1A3Y0	MTD1
12.4385	12.7926	12.8173	12.8005	9.9713	11.9183	10.7951	10.3285	12.5033	10.5833	12.3015	10.3334	12.3868	12.5744	10.7362	12.8978	+	GI_GC	2.39735	-1.95896	-4.52285	M1A3Y1	MTD1
14.1775	14.4426	14.3914	13.8877	11.9526	12.6442	13.4271	12.8513	12.9838	13.1572	13.7494	14.0287	8.32476	10.0015	10.8675	10.0829	+	GI_GC	2.41918	-1.506	-4.57036	M1A3Z9	Signal transducer
14.0084	14.2518	14.3434	14.2634	13.3774	13.7772	13.65	13.3402	12.9376	13.7043	13.7431	13.3162	14.7935	14.6455	14.7239	14.982	+	GI_GC	2.73966	-0.680551	-5.30498	M1A4G9	Uncharacterized protein
14.8458	15.1406	15.3664	15.277	15.1939	15.7861	15.8028	15.9138	14.885	15.2445	14.7931	15.3987	15.0373	15.1962	15.0997	15.2856	+	GI_GC	1.39319	0.516747	2.60408	M1A4K3	Uncharacterized protein
12.4222	12.7093	13.0111	12.8501	13.1663	13.5401	13.7421	13.659	13.5039	13.7578	13.6515	13.8224	14.1327	14.1343	13.9748	14.2573	+	GI_GC	2.32555	0.778712	4.36874	M1A4M4	Synaptotagmin
12.4222	12.7093	13.0111	12.8501	13.1663	13.5401	13.7421	13.659	13.5039	13.7578	13.6515	13.8224	14.1327	14.1343	13.9748	14.2573	+	GI_GC	2.32555	0.778712	4.36874	M1A4M5	Synaptotagmin
12.4222	12.7093	13.0111	12.8501	13.1663	13.5401	13.7421	13.659	13.5039	13.7578	13.6515	13.8224	14.1327	14.1343	13.9748	14.2573	+	GI_GC	2.32555	0.778712	4.36874	M1A4M6	Synaptotagmin
10.1306	10.0521	15.6697	9.60291	15.0216	15.6529	15.4616	15.6445	15.6009	15.8686	15.7435	16.0793	16.1994	16.1762	16.2788	16.3617	+	GI_GC	1.51745	4.0813	2.81942	M1A4R1	DNA-binding protein
10.921	11.0504	11.7476	9.27518	12.3819	12.6043	13.3489	13.202	10.8885	11.0882	11.4151	11.79	11.9512	12.0709	11.5617	11.7972	+	GI_GC	2.01082	2.13575	3.72849	M1A691	Serine-threonine protein kinase, plant-type;Serine-threonine protein kinase, plant-type
10.921	11.0504	11.7476	9.27518	12.3819	12.6043	13.3489	13.202	10.8885	11.0882	11.4151	11.79	11.9512	12.0709	11.5617	11.7972	+	GI_GC	2.01082	2.13575	3.72849	M1A692	Serine-threonine protein kinase, plant-type;Serine-threonine protein kinase, plant-type
16.8286	17.1017	17.1896	17.0366	16.1118	16.4356	16.5999	16.6681	17.4744	17.7699	17.4481	17.5974	17.4785	17.6548	17.6249	17.6508	+	GI_GC	2.15339	-0.585264	-4.01175	M1A6H3	Chlorophyll a-b binding protein, chloroplastic
12.0638	12.2488	12.6626	11.9708	12.6893	13.0696	13.5282	13.2686	12.2848	12.443	12.5435	12.4875	12.2066	12.8445	12.1328	12.5844	+	GI_GC	2.07543	0.902443	3.85554	M1A714	Multidrug resistance-associated protein 2, 6 (Mrp2, 6), abc-transoprter;Multidrug resistance-associated protein 2, 6 (Mrp2, 6), abc-transoprter
12.0638	12.2488	12.6626	11.9708	12.6893	13.0696	13.5282	13.2686	12.2848	12.443	12.5435	12.4875	12.2066	12.8445	12.1328	12.5844	+	GI_GC	2.07543	0.902443	3.85554	M1A714	Multidrug resistance-associated protein 2, 6 (Mrp2, 6), abc-transoprter;Multidrug resistance-associated protein 2, 6 (Mrp2, 6), abc-transoprter
12.0638	12.2488	12.6626	11.9708	12.6893	13.0696	13.5282	13.2686	12.2848	12.443	12.5435	12.4875	12.2066	12.8445	12.1328	12.5844	+	GI_GC	2.07543	0.902443	3.85554	M1A715	Multidrug resistance-associated protein 2, 6 (Mrp2, 6), abc-transoprter;Multidrug resistance-associated protein 2, 6 (Mrp2, 6), abc-transoprter
12.0638	12.2488	12.6626	11.9708	12.6893	13.0696	13.5282	13.2686	12.2848	12.443	12.5435	12.4875	12.2066	12.8445	12.1328	12.5844	+	GI_GC	2.07543	0.902443	3.85554	M1A715	Multidrug resistance-associated protein 2, 6 (Mrp2, 6), abc-transoprter;Multidrug resistance-associated protein 2, 6 (Mrp2, 6), abc-transoprter
13.4826	11.9021	9.56818	10.9455	13.9694	14.6248	14.8419	14.6927	11.0866	11.3257	8.98563	10.7949	9.7618	9.94993	10.7556	11.0589	+	GI_GC	1.95314	3.0576	3.61684	M1A792	Uncharacterized protein
13.4826	10.9227	10.5675	8.98079	13.9694	14.6248	14.8419	14.6927	9.75861	9.89733	10.6919	11.5062	9.55353	10.5821	11.1454	9.7179	+	GI_GC	2.00736	3.5438	3.72176	M1A793	Uncharacterized protein
12.5557	12.0269	12.7116	12.4182	11.8224	10.0663	11.1904	11.723	13.2317	13.2294	13.095	13.0718	13.2349	13.3138	13.4649	13.2432	+	GI_GC	1.54309	-1.22759	-2.86441	M1A8C0	Serine/threonine protein kinase
12.5557	12.0269	12.7116	12.4182	11.8224	10.8903	11.0216	10.454	13.2317	13.2294	13.095	13.0718	13.2349	13.3138	13.4649	13.2432	+	GI_GC	2.29473	-1.38103	-4.30356	M1A8C3	Serine/threonine protein kinase
12.5557	12.0269	12.7116	12.4182	11.8224	9.77882	10.797	9.71223	13.2317	13.2294	13.095	13.0718	13.2349	13.3138	13.4649	13.2432	+	GI_GC	1.97652	-1.90048	-3.6619	M1A8C4	Serine/threonine protein kinase
16.7397	16.9512	17.0381	16.92	16.8976	17.4186	17.4221	17.4443	16.7624	17.1132	16.9349	17.1108	17.0721	17.2196	17.0228	17.1948	+	GI_GC	1.39704	0.383409	2.61069	M1A8G3	Uncharacterized protein
18.7594	19.2619	19.5711	19.117	19.9464	20.4158	21.3173	20.8115	17.7727	18.2786	18.0909	18.4943	19.2416	19.344	18.9344	19.4062	+	GI_GC	2.29095	1.44541	4.2956	M1A8M8	FLZ-type domain-containing protein
15.5787	15.7682	15.9878	15.8613	16.4424	16.7262	16.9395	16.8915	15.7414	16.1091	15.9251	16.1037	15.5971	15.6941	15.4892	15.5843	+	GI_GC	3.27815	0.950903	6.72228	M1A8M8	FLZ-type domain-containing protein
10.2189	10.0137	9.60531	8.56312	11.7337	16.3672	16.5725	16.5911	16.2067	16.2712	10.0436	16.5419	8.69353	11.0028	10.8803	11.4975	+	GI_GC	2.41903	5.71587	4.57001	M1A9A3	Protein OBERON 4
11.23	11.7206	10.8058	9.78687	10.3934	16.3672	16.5725	16.5911	16.2067	16.2712	11.2334	16.5419	10.6677	11.7523	11.0117	10.8255	+	GI_GC	1.38193	4.09524	2.58477	M1A9A4	Protein OBERON 4
12.5748	12.6262	13.334	12.4539	13.2107	13.68	13.9142	13.5437	12.2754	12.3557	12.6131	12.6707	11.045	11.7163	11.9082	11.5165	+	GI_GC	1.83671	0.839894	3.39618	M1AAA2	Integral membrane single C2 domain protein
14.5772	14.8374	14.8034	14.7782	13.8002	14.2823	14.5556	14.3259	14.4201	14.8203	14.6161	15.085	14.5619	10.6967	11.2854	14.8347	+	GI_GC	1.6215	-0.508032	-3.00331	M1AAV9	ADP-ribosylation factor GTPase-activating protein AGD14
14.5772	14.8374	14.8034	14.7782	13.8002	14.2823	14.5556	14.3259	14.4201	14.8203	14.6161	15.085	14.5619	9.96461	10.5886	14.8347	+	GI_GC	1.6215	-0.508032	-3.00331	M1AAW0	ADP-ribosylation factor GTPase-activating protein AGD14
18.3476	18.578	18.61	18.272	17.5318	17.9714	18.1478	18.1122	17.7217	17.8863	17.7677	18.0379	17.7842	17.8156	17.7305	17.8646	+	GI_GC	1.67945	-0.511083	-3.10735	M1AB97	H/ACA ribonucleoprotein complex subunit 4
18.3476	18.578	18.61	18.272	17.5318	17.9714	18.1478	18.1122	17.7217	17.8863	17.7677	18.0379	17.7842	17.8156	17.7305	17.8646	+	GI_GC	1.67945	-0.511083	-3.10735	M1AB98	H/ACA ribonucleoprotein complex subunit 4
16.2503	16.4985	16.3405	16.4308	15.6492	15.9305	16.0243	15.8868	16.3239	16.6312	16.4985	16.8336	17.3446	17.1802	17.1291	17.2028	+	GI_GC	2.72238	-0.507332	-5.26349	M1ABI2	Extensin
16.8493	16.8017	16.9791	16.9162	16.6982	16.7098	16.7982	16.7859	16.9509	17.2033	16.9449	17.1779	17.3658	17.306	17.1071	17.1654	+	GI_GC	1.60821	-0.138524	-2.97963	M1ABI2	Extensin
17.0007	16.9305	17.0573	16.8291	16.0379	16.2177	16.8466	16.6765	17.2463	17.5308	17.3908	17.6398	18.2355	18.0401	17.9225	18.2093	+	GI_GC	1.39054	-0.509721	-2.59954	M1ABI2	Extensin
9.48586	10.9261	10.639	10.6647	13.7168	13.3143	13.224	13.621	12.7833	13.8281	11.837	13.8566	13.2787	14.0267	10.636	14.0756	+	GI_GC	3.9464	3.04012	8.88562	M1ABI2	Extensin
11.6794	11.8112	11.842	11.2877	10.2609	11.1864	10.2043	11.3104	11.2863	11.8897	11.5361	12.1352	11.2019	11.5139	11.3373	11.5695	+	GI_GC	1.53465	-0.914578	-2.84958	M1AE01	26S proteasome regulatory subunit RPN11
17.3562	17.4953	17.2909	17.5361	16.1306	16.6221	16.8382	16.7353	17.9834	18.1402	18.1492	18.6382	17.1004	17.1408	16.9404	16.5151	+	GI_GC	2.61911	-0.838048	-5.02012	M1AE81	Major intrinsic protein 2
14.6585	14.7071	14.8595	14.6668	8.87131	14.0308	10.4004	11.4031	10.4255	14.5085	14.2226	14.442	13.8504	11.1326	11.0664	13.945	+	GI_GC	1.76709	-3.54658	-3.26708	M1AF17	Chlorophyll a-b binding protein, chloroplastic;Chlorophyll a-b binding protein, chloroplastic;Chlorophyll a-b binding protein, chloroplastic
14.6585	14.7071	14.8595	14.6668	10.1962	14.0308	10.8484	9.56821	9.61803	14.5085	14.2226	14.442	13.8504	9.55411	9.99983	13.945	+	GI_GC	1.93807	-3.5621	-3.58793	M1DQW0	Chlorophyll a-b binding protein, chloroplastic;Chlorophyll a-b binding protein, chloroplastic;Chlorophyll a-b binding protein, chloroplastic
14.6585	14.7071	14.8595	14.6668	9.86735	14.0308	9.41925	11.0976	10.7003	14.5085	14.2226	14.442	13.8504	9.85483	10.409	13.945	+	GI_GC	1.88268	-3.61924	-3.48257	Q41421	Chlorophyll a-b binding protein, chloroplastic;Chlorophyll a-b binding protein, chloroplastic;Chlorophyll a-b binding protein, chloroplastic
12.9654	13.2458	13.4616	13.405	13.8099	14.0406	14.2141	14.1274	13.6296	13.8861	13.8181	13.9185	13.6579	13.7444	13.5219	13.6414	+	GI_GC	2.82662	0.778536	5.5173	M1AF43	RNA binding protein
12.1977	12.4176	12.5074	12.3628	12.6261	12.8799	12.8866	13.0332	12.671	12.8852	13.03	12.8141	13.0737	13.1062	13.0637	13.2583	+	GI_GC	2.40793	0.485077	4.54584	M1AF43	RNA binding protein
18.7857	19.2221	19.0477	19.8133	20.896	21.2796	20.2768	21.344	18.8641	19.7333	10.1434	19.1483	19.1767	19.6097	11.4547	11.4928	+	GI_GC	2.72993	1.73187	5.28158	M1AFT5	Chlorophyll a-b binding protein, chloroplastic
10.8319	11.2625	10.8022	10.1571	11.9312	12.2772	12.3595	12.2947	12.2539	12.6802	12.2111	12.5794	12.5838	12.7799	12.4868	12.7493	+	GI_GC	2.966	1.45224	5.87025	M1AGP7	WPP domain-interacting protein 2
10.7245	11.2625	11.7722	10.8561	11.9312	12.2772	12.3595	12.2947	12.2539	12.6802	12.2111	12.5794	12.5838	12.7799	12.4868	12.7493	+	GI_GC	2.22983	1.06185	4.16814	M1AGP8	WPP domain-interacting protein 2
14.0897	14.3607	14.5213	14.4742	14.7022	15.0468	15.1472	15.0486	13.6165	14.061	13.7297	14.0173	14.5011	14.4763	14.5583	14.693	+	GI_GC	2.40962	0.624723	4.54951	M1AHP3	Eukaryotic translation initiation factor 3 subunit A
13.2693	13.559	13.732	13.4531	13.7483	13.7082	14.0969	14.1114	13.4559	13.7901	13.407	13.5481	13.6531	13.5104	13.3486	13.7112	+	GI_GC	1.52501	0.412829	2.83267	M1AHZ8	Glutaredoxin-dependent peroxiredoxin
14.1199	14.2586	14.3688	14.303	14.509	14.7379	14.8468	14.941	14.5315	14.6911	14.5722	14.7938	14.2696	14.3642	14.1217	14.2641	+	GI_GC	2.45184	0.496102	4.64199	M1AIY2	Uncharacterized protein
13.637	13.9194	13.9034	13.9068	14.0268	14.1738	14.4114	14.4782	13.5633	13.8628	13.6741	13.7474	13.4941	13.7205	13.4911	13.6758	+	GI_GC	1.86287	0.430898	3.44522	M1AJ68	Alkaline/neutral invertase
14.3008	14.6215	14.5359	14.4561	12.6337	13.4528	14.136	13.5002	14.2419	13.5424	14.363	14.6354	13.5195	11.4047	9.3272	13.7897	+	GI_GC	1.79701	-1.04788	-3.3223	M1AKW9	Uncharacterized protein
13.294	13.5911	13.2797	13.4019	11.4592	12.1409	10.1328	10.7105	13.0274	13.3928	13.1691	13.4145	10.4522	10.1357	10.2377	10.3183	+	GI_GC	2.67116	-2.28082	-5.1418	M1AKX0	Uncharacterized protein
11.8468	11.9277	12.4173	11.9881	12.8057	12.9744	12.8694	13.0869	10.4712	11.0166	10.4975	11.1824	12.4276	12.7119	12.5008	12.7206	+	GI_GC	3.12006	0.889094	6.27964	M1AL12	Purine transporter
16.3109	16.3455	16.445	16.4149	16.6529	16.8697	16.8578	16.9415	16.6458	16.5926	16.6505	16.5741	17.1772	17.1344	17.0231	17.2551	+	GI_GC	3.20659	0.451405	6.519	M1ALF9	Uncharacterized protein
9.4856	10.3663	10.1081	9.57653	10.4977	11.331	11.306	10.4318	10.1929	10.1547	10.3268	11.2433	11.3802	11.4851	11.1969	11.5696	+	GI_GC	1.67529	1.00748	3.09985	M1ALM1	Zinc finger protein
13.8437	14.365	14.1186	14.8685	15.3466	15.6401	16.0115	14.8322	15.3775	16.0727	15.7655	16.1073	15.6329	16.0371	15.5583	15.2444	+	GI_GC	1.89401	1.15868	3.504	M1ALZ1	Alkaline/neutral invertase
13.771	14.0117	14.0054	13.8956	14.0617	14.6331	14.5977	14.5817	14.4166	14.6579	13.5694	13.9111	14.03	14.8197	14.7974	14.6131	+	GI_GC	2.00452	0.547677	3.71621	M1ALZ1	Alkaline/neutral invertase
15.7688	16.1071	16.0776	16.0342	14.7925	15.3591	15.6234	15.6344	9.88075	15.5442	15.3706	15.5706	14.7483	11.019	10.7072	10.2074	+	GI_GC	1.6435	-0.644569	-3.04267	M1AM10	Lupus la ribonucleoprotein
15.7688	16.1071	16.0776	16.0342	14.7925	15.3591	15.6234	15.6344	12.1604	15.5442	15.3706	15.5706	14.7483	10.5829	10.5632	10.6554	+	GI_GC	1.6435	-0.644569	-3.04267	M1AM11	Lupus la ribonucleoprotein
14.5557	14.4589	14.5453	14.5925	14.6724	14.8915	15.1157	14.8845	14.148	14.2148	14.3768	14.2719	14.0092	14.1945	13.978	14.1648	+	GI_GC	2.00744	0.35293	3.72191	M1AM81	Serine/threonine-protein kinase cx32
14.5557	14.4589	14.5453	14.5925	14.6724	14.8915	15.1157	14.8845	14.148	14.2148	14.3768	14.2719	14.0092	14.1945	13.978	14.1648	+	GI_GC	2.00744	0.35293	3.72191	M1AM82	Serine/threonine-protein kinase cx32
18.6193	18.9571	18.9802	18.1418	19.1796	19.5242	19.5762	19.5927	19.2419	19.3665	19.2305	19.4702	19.9353	20.1523	19.5589	19.9775	+	GI_GC	1.95973	0.793599	3.62951	M1AM98	Hexose transporter
19.0098	19.2575	19.5496	19.5127	19.7567	20.3434	20.0443	20.1201	19.6435	19.9255	19.6373	19.7654	20.1188	20.2756	20.0214	20.1245	+	GI_GC	2.24766	0.733737	4.20509	M1AM98	Hexose transporter
16.0349	16.4201	16.5424	16.4011	16.9837	17.4777	17.7025	17.7083	16.364	16.7475	16.5786	16.7576	18.5858	18.7721	18.4019	18.8364	+	GI_GC	2.83088	1.11842	5.52785	M1AM98	Hexose transporter
15.8755	16.4121	16.4486	16.0836	16.8042	17.5882	17.5519	17.6025	15.9858	16.2394	16.0326	16.3139	16.9989	17.2486	16.8614	13.0616	+	GI_GC	2.59617	1.18174	4.96712	M1AM98	Hexose transporter
13.3713	14.0755	14.1599	14.265	14.6622	15.254	15.3535	15.3558	14.007	14.4463	14.0017	14.2784	14.7468	14.804	14.4531	14.9395	+	GI_GC	2.4019	1.18847	4.53273	M1AM98	Hexose transporter
9.74343	11.1604	10.3726	10.2185	12.6325	13.2431	11.6096	13.6993	9.83936	10.943	10.3098	11.174	13.0921	13.2638	12.6544	13.0728	+	GI_GC	2.38295	2.42243	4.49167	M1AMJ3	DNA double-strand break repair rad50 ATPase
12.7869	12.8494	13.2902	12.9211	13.1667	13.351	13.6876	13.6623	12.7498	12.6941	12.6216	12.9675	12.7873	12.6764	12.6657	12.7174	+	GI_GC	1.61199	0.505015	2.98636	M1APN1	PWWP domain-containing protein
12.931	13.2537	13.3284	12.9733	12.5076	12.8978	12.609	12.9581	13.393	13.9807	13.8061	13.9475	13.3713	13.6097	13.615	13.7377	+	GI_GC	1.36779	-0.378458	-2.56057	M1AQ70	Calcium-dependent protein kinase 8
15.2594	15.6467	15.6988	15.6214	15.7746	16.2227	16.3344	16.073	15.028	15.3755	15.3831	15.2835	15.8239	15.8823	15.75	15.9982	+	GI_GC	1.8703	0.544619	3.4592	M1AQJ9	GYF domain-containing protein
15.2594	15.6467	15.6988	15.6214	15.7746	16.2227	16.3344	16.073	15.028	15.3755	15.3831	15.2835	15.8239	15.8823	15.75	15.9982	+	GI_GC	1.8703	0.544619	3.4592	M1AQK0	GYF domain-containing protein
14.3056	14.5041	14.558	14.3573	14.5511	14.8724	15.014	15.0393	14.3874	14.753	14.413	15.0345	14.8315	14.8871	14.8098	15.098	+	GI_GC	1.86356	0.437941	3.44652	M1AQJ9	GYF domain-containing protein
14.3056	14.5041	14.558	14.3573	14.5511	14.8724	15.014	15.0393	14.3874	14.753	14.413	15.0345	14.8315	14.8871	14.8098	15.098	+	GI_GC	1.86356	0.437941	3.44652	M1AQK0	GYF domain-containing protein
16.4508	16.9919	16.5132	16.5518	15.9717	16.3642	16.3478	16.1308	16.1159	16.0868	15.8023	16.0696	15.5085	15.3999	15.5109	15.3889	+	GI_GC	1.46617	-0.423296	-2.73003	M1ASB9	Eukaryotic translation initiation factor 3 subunit
16.2707	16.5576	16.5386	16.6735	10.2721	9.92041	10.0748	16.3354	11.9238	16.3106	16.3597	16.3979	9.74931	16.587	16.1119	16.3574	+	GI_GC	1.67758	-4.85942	-3.10396	M1ASB9	Eukaryotic translation initiation factor 3 subunit
11.8293	12.7595	12.7134	9.99663	9.58287	10.3208	10.237	9.95834	12.5348	12.7091	13.1187	13.0241	14.9604	14.6601	14.5075	14.815	+	GI_GC	1.44815	-1.79993	-2.69879	M1ASB9	Eukaryotic translation initiation factor 3 subunit
11.8293	12.7595	12.7134	9.99663	9.58287	10.3208	10.237	9.95834	12.5348	12.7091	13.1187	13.0241	14.9604	14.6601	14.5075	14.815	+	GI_GC	1.44815	-1.79993	-2.69879	M1ASB9	Eukaryotic translation initiation factor 3 subunit
13.1643	13.2418	13.1587	13.2486	12.9509	12.9442	12.7346	12.6013	13.4877	13.4441	13.7278	13.3629	13.605	13.4965	13.4053	13.0474	+	GI_GC	2.37102	-0.395577	-4.46595	M1ASG0	Arginine/serine-rich protein
13.1643	13.2418	13.1587	13.2486	12.9509	12.9442	12.7346	12.6013	13.4877	13.4441	13.7278	13.3629	13.605	13.4965	13.4053	13.0474	+	GI_GC	2.37102	-0.395577	-4.46595	M1ASG1	Arginine/serine-rich protein
10.7866	10.3875	10.5672	10.0742	11.3792	11.4632	11.0019	10.5965	12.6778	10.5452	12.8025	13.0111	11.0605	9.26968	10.913	9.991	+	GI_GC	1.4109	0.656307	2.63452	M1ASZ3	ZYRO0G14608p
12.3293	12.6079	12.9516	12.2857	12.0023	12.3507	11.3042	11.8123	12.5564	12.7794	12.3306	12.944	12.905	12.9333	12.323	12.9082	+	GI_GC	1.35194	-0.676271	-2.5335	M1ATR6	Amino acid transporter
12.3293	12.6079	12.9516	12.2857	12.0023	12.3507	11.3042	11.8123	12.5564	12.7794	12.3306	12.944	12.905	12.9333	12.323	12.9082	+	GI_GC	1.35194	-0.676271	-2.5335	M1ATR7	Amino acid transporter
13.2375	13.6111	13.6447	13.3403	14.1551	14.825	15.0206	14.9664	13.3955	13.7116	13.4577	13.9557	13.6292	13.9264	13.4405	13.9116	+	GI_GC	2.91497	1.28338	5.73916	M1AUI7	MAP kinase phosphatase 1
13.2375	13.6111	13.6447	13.3403	14.1551	14.825	15.0206	14.9664	13.3955	13.7116	13.4577	13.9557	13.6292	13.9264	13.4405	13.9116	+	GI_GC	2.91497	1.28338	5.73916	M1AUI8	MAP kinase phosphatase 1
11.7681	12.0877	12.3514	12.0935	10.8322	10.8763	9.80374	12.0715	10.6098	12.3539	11.0819	11.5317	13.3816	9.44654	11.0924	10.0789	+	GI_GC	1.3106	-1.17923	-2.46315	M1AUR8	Vacuolar cation/proton exchanger
11.7738	10.0975	12.4745	11.0059	12.6204	12.6335	12.3565	13.7357	11.6637	10.4318	12.0278	10.5464	13.2	13.2977	14.046	14.5083	+	GI_GC	1.34168	1.49862	2.516	M1AWH4	Oligopeptide transporter OPT family
11.4518	9.31351	12.0111	11.2469	14.9432	15.7687	16.3355	14.0489	10.5481	14.4337	10.5122	11.5069	13.0539	13.6301	12.841	13.232	+	GI_GC	2.8373	4.26828	5.54379	M1AXB5	Sodium/calcium exchanger family protein
9.45425	11.6291	10.6923	9.77712	12.587	11.9069	11.6836	13.284	12.2267	12.7655	12.6155	12.9296	13.2326	13.1197	13.148	13.3732	+	GI_GC	1.75683	1.97716	3.24822	M1AY92	Microtubule-associated protein futsch
15.5529	15.8454	15.882	16.0203	15.0972	15.606	15.5018	15.3579	14.9075	15.3841	15.3076	15.2909	15.4702	15.4692	15.3827	15.4298	+	GI_GC	1.58682	-0.434448	-2.94162	M1AYB5	TPX2 domain-containing protein
14.9251	15.1777	15.2811	15.3407	14.3284	14.791	14.8322	14.8925	14.5634	14.8843	14.6899	14.9701	14.4399	14.3909	14.2999	14.3129	+	GI_GC	1.60072	-0.470119	-2.9663	M1AZJ6	Receptor protein kinase
14.0943	14.2481	14.3388	14.317	13.1739	13.9408	13.6204	13.7834	12.596	12.8214	12.8249	12.67	12.695	12.9803	12.5742	12.8046	+	GI_GC	1.92104	-0.619954	-3.55537	M1B1J1	Uncharacterized protein
14.0498	14.0048	14.1505	14.2517	9.54721	9.00869	10.4855	10.6651	14.2063	14.2851	9.65016	14.6246	14.4324	14.3587	14.1496	14.299	+	GI_GC	4.37677	-4.18758	-10.5783	M1B1P6	Integrin-linked protein kinase
14.0498	14.0048	14.1505	14.2517	11.0241	10.1591	10.6644	9.73423	14.2063	14.2851	10.0325	14.6246	14.4324	14.3587	14.1496	14.299	+	GI_GC	4.87503	-3.71875	-12.902	M1B1P7	Integrin-linked protein kinase
13.5193	13.7802	13.5437	13.2623	12.7312	12.9807	13.3332	13.24	13.0298	13.332	13.5561	13.5535	13.6023	13.5053	13.5104	13.762	+	GI_GC	1.41674	-0.455127	-2.64458	M1B203	Marker Xucw84
13.5193	13.7802	13.5437	13.2623	12.7312	12.9807	13.3332	13.24	13.0298	13.332	13.5561	13.5535	13.6023	13.5053	13.5104	13.762	+	GI_GC	1.41674	-0.455127	-2.64458	M1B204	Marker Xucw84
17.6102	17.9719	18.0574	17.8969	16.6727	17.3146	17.6655	17.4684	17.3939	17.8179	17.8252	18.2058	17.8487	17.7715	17.5031	17.9559	+	GI_GC	1.36806	-0.603814	-2.56103	M1B3Z5	Protein TOPLESS
13.9162	14.1629	14.4432	14.0898	14.3484	14.8256	15.1108	15.0016	13.9442	14.2186	14.2394	14.554	14.3504	14.4192	14.3107	14.3728	+	GI_GC	1.79998	0.668581	3.32782	M1B452	Respiratory burst oxidase homolog protein C
13.9162	14.1629	14.4432	14.0898	14.3484	14.8256	15.1108	15.0016	13.9442	14.2186	14.2394	14.554	14.3504	14.4192	14.3107	14.3728	+	GI_GC	1.79998	0.668581	3.32782	Q2HXL0	Respiratory burst oxidase homolog protein C
14.337	14.388	13.8789	14.2075	12.7986	13.504	13.2797	12.7882	14.09	14.1403	14.0439	14.2007	13.568	13.9843	13.7234	13.552	+	GI_GC	2.70869	-1.1102	-5.23076	M1B485	ATP binding protein
10.9181	11.2578	11.5445	11.3391	12.0008	11.519	12.083	12.2961	13.701	13.5197	13.8756	14.3211	14.3674	14.5015	14.2037	14.4522	+	GI_GC	1.83122	0.709852	3.38593	M1B498	Nucleoporin
16.4078	16.5481	16.7281	16.4427	16.6267	16.8173	16.9647	17.0092	17.2552	17.5462	17.2888	17.6353	17.6363	17.6018	17.4138	17.5502	+	GI_GC	1.5484	0.322839	2.87376	M1B4M9	Splicing factor
16.4078	16.5481	16.7281	16.4427	16.6267	16.8173	16.9647	17.0092	17.2552	17.5462	17.2888	17.6353	17.6363	17.6018	17.4138	17.5502	+	GI_GC	1.5484	0.322839	2.87376	M1B4M9	Splicing factor
16.4078	16.5481	16.7281	16.4427	16.6267	16.8173	16.9647	17.0092	17.2552	17.5462	17.2888	17.6353	17.6363	17.6018	17.4138	17.5502	+	GI_GC	1.5484	0.322839	2.87376	M1B4N0	Splicing factor
16.4078	16.5481	16.7281	16.4427	16.6267	16.8173	16.9647	17.0092	17.2552	17.5462	17.2888	17.6353	17.6363	17.6018	17.4138	17.5502	+	GI_GC	1.5484	0.322839	2.87376	M1B4N0	Splicing factor
16.4078	16.5481	16.7281	16.4427	16.6267	16.8173	16.9647	17.0092	17.2552	17.5462	17.2888	17.6353	17.6363	17.6018	17.4138	17.5502	+	GI_GC	1.5484	0.322839	2.87376	M1B4N1	Splicing factor
16.4078	16.5481	16.7281	16.4427	16.6267	16.8173	16.9647	17.0092	17.2552	17.5462	17.2888	17.6353	17.6363	17.6018	17.4138	17.5502	+	GI_GC	1.5484	0.322839	2.87376	M1B4N1	Splicing factor
16.4078	16.5481	16.7281	16.4427	16.6267	16.8173	16.9647	17.0092	17.2552	17.5462	17.2888	17.6353	17.6363	17.6018	17.4138	17.5502	+	GI_GC	1.5484	0.322839	2.87376	M1B4N2	Splicing factor
16.4078	16.5481	16.7281	16.4427	16.6267	16.8173	16.9647	17.0092	17.2552	17.5462	17.2888	17.6353	17.6363	17.6018	17.4138	17.5502	+	GI_GC	1.5484	0.322839	2.87376	M1B4N2	Splicing factor
20.6164	20.902	16.277	19.9015	15.5192	15.3249	15.4158	15.0115	20.9496	20.6088	20.5653	20.6089	20.3288	20.9283	20.757	20.9697	+	GI_GC	2.05637	-4.10638	-3.81785	M1B583	Heat shock cognate protein 80
11.3592	11.2785	11.4215	10.9653	10.3076	9.85181	10.7071	10.4485	10.7899	10.6786	10.8429	10.3126	9.1434	10.884	11.8051	10.658	+	GI_GC	2.38928	-0.927383	-4.50537	M1B5I2	ATP-dependent Clp protease ATP-binding subunit clpA homolog CD4B, chloroplastic
10.99	9.02833	10.9432	8.63712	13.129	13.323	11.1492	13.5488	10.3669	11.7858	9.88875	10.493	10.6572	10.4003	10.0835	11.2068	+	GI_GC	1.87752	2.88785	3.47281	M1B6B9	Ulp1 protease family, C-terminal catalytic domain containing protein;Ulp1 protease family, C-terminal catalytic domain containing protein
11.0034	10.3543	10.3967	10.3279	13.129	13.323	10.7481	13.5488	9.52225	11.0913	10.2636	9.47673	10.9622	10.6827	9.85693	10.9478	+	GI_GC	1.74432	2.16665	3.22529	M1B6C0	Ulp1 protease family, C-terminal catalytic domain containing protein;Ulp1 protease family, C-terminal catalytic domain containing protein
14.3051	14.3725	14.5456	14.5061	13.3985	13.8421	13.992	13.8828	13.3355	13.6369	13.4062	13.9679	13.1297	12.9505	12.8743	13.1268	+	GI_GC	2.42938	-0.653455	-4.59264	M1B8C7	CBS domain containing protein
16.5479	16.9242	16.5937	16.9594	16.8886	17.5995	17.3658	17.743	18.3863	18.492	18.1917	18.6663	20.0848	20.2667	19.9759	20.2289	+	GI_GC	1.60716	0.642931	2.97776	M1B8U0	Phosphoenolpyruvate carboxylase
16.5479	16.9242	16.5937	16.9594	16.8886	17.5995	17.3658	17.743	18.3863	18.492	18.1917	18.6663	20.0848	20.2667	19.9759	20.2289	+	GI_GC	1.60716	0.642931	2.97776	M1BWV7	Phosphoenolpyruvate carboxylase
16.5479	16.9242	16.5937	16.9594	16.8886	17.5995	17.3658	17.743	18.3863	18.492	18.1917	18.6663	20.0848	20.2667	19.9759	20.2289	+	GI_GC	1.60716	0.642931	2.97776	P29196	Phosphoenolpyruvate carboxylase
16.468	16.7727	16.9459	16.3694	17.1106	17.3484	17.5027	17.507	16.9622	17.2846	16.8923	17.1583	17.778	18.0174	17.7758	17.9428	+	GI_GC	2.37371	0.728147	4.47175	M1B927	Sugar transporter
16.468	16.7727	16.9459	16.3694	17.1106	17.3484	17.5027	17.507	16.9622	17.2846	16.8923	17.1583	17.778	18.0174	17.7758	17.9428	+	GI_GC	2.37371	0.728147	4.47175	M1B928	Sugar transporter
12.6416	12.4514	12.7108	12.3226	11.3145	11.8617	11.9624	11.7634	12.4168	12.6352	12.4722	12.9308	12.6803	12.0944	12.1499	12.6391	+	GI_GC	2.51961	-0.806077	-4.7929	M1BBJ0	Sinapyl alcohol dehydrogenase 2
12.6416	12.4514	12.7108	12.3226	11.3145	11.8617	11.9624	11.7634	12.4168	12.6352	12.4722	12.9308	12.6803	12.0944	12.1499	12.6391	+	GI_GC	2.51961	-0.806077	-4.7929	M1BBJ1	Sinapyl alcohol dehydrogenase 2
10.964	10.7028	10.3953	15.39	14.5158	15.2461	16.1048	15.5244	15.3875	15.7568	15.8321	16.1347	15.8885	10.0217	15.7219	16.1459	+	GI_GC	1.52972	3.48473	2.84093	M1BC39	Nucleic acid binding protein
14.5923	15.1273	15.0336	14.911	12.3156	14.2157	14.3262	13.461	14.0441	14.3608	14.1556	14.5225	12.9969	14.3005	13.856	14.3614	+	GI_GC	1.5054	-1.33644	-2.79835	M1BDG0	Uncharacterized protein
14.5923	15.1273	15.0336	14.911	12.3156	14.2157	14.3262	13.461	14.0441	14.3608	14.1556	14.5225	12.9969	14.3005	13.856	14.3614	+	GI_GC	1.5054	-1.33644	-2.79835	M1BDG1	Uncharacterized protein
14.5923	15.1273	15.0336	14.911	12.3156	14.2157	14.3262	13.461	14.0441	14.3608	14.1556	14.5225	12.9969	14.3005	13.856	14.3614	+	GI_GC	1.5054	-1.33644	-2.79835	M1BDG2	Uncharacterized protein
15.2513	15.4783	15.4773	15.2958	14.7384	15.1163	15.1422	15.1486	14.1664	14.7327	14.3811	14.7814	14.268	14.5046	14.3675	14.6073	+	GI_GC	1.57636	-0.339272	-2.9231	M1BDU8	Transcription factor RF2b
15.2513	15.4783	15.4773	15.2958	14.7384	15.1163	15.1422	15.1486	14.1664	14.7327	14.3811	14.7814	14.268	14.5046	14.3675	14.6073	+	GI_GC	1.57636	-0.339272	-2.9231	M1CN16	Transcription factor RF2b
9.70644	10.9766	10.8774	9.77367	10.9384	11.468	12.1724	12.0752	10.4327	9.30168	11.1013	10.5873	11.2028	11.0074	11.1819	11.6667	+	GI_GC	1.60204	1.32995	2.96865	M1BE97	Syntaxin
9.70644	10.9766	10.8774	9.77367	10.9384	11.468	12.1724	12.0752	10.4327	9.30168	11.1721	10.5873	11.2028	11.0074	11.1819	11.6667	+	GI_GC	1.60204	1.32995	2.96865	M1BE98	Syntaxin
9.70644	10.9766	10.8774	9.77367	10.9384	11.468	12.1724	12.0752	10.4327	9.30168	10.9404	10.5873	11.2028	11.0074	11.1819	11.6667	+	GI_GC	1.60204	1.32995	2.96865	M1BE99	Syntaxin
9.70644	10.9766	10.8774	9.77367	10.9384	11.468	12.1724	12.0752	10.4327	9.30168	10.0707	10.5873	11.2028	11.0074	11.1819	11.6667	+	GI_GC	1.60204	1.32995	2.96865	M1D7S2	Syntaxin
13.4823	13.6797	13.4778	13.2192	13.9621	14.3687	14.0719	13.6776	14.8985	14.7005	14.8478	15.038	15.3813	15.3766	15.3159	15.6222	+	GI_GC	1.75379	0.555277	3.24264	M1BEW3	Glycine-rich RNA-binding protein
13.4823	13.6797	13.4778	13.2192	13.9621	14.3687	14.0719	13.6776	14.8985	14.7005	14.8478	15.038	15.3813	15.3766	15.3159	15.6222	+	GI_GC	1.75379	0.555277	3.24264	M1BEW4	Glycine-rich RNA-binding protein
13.4823	13.6797	13.4778	13.2192	13.9621	14.3687	14.0719	13.6776	14.8985	14.7005	14.8478	15.038	15.3813	15.3766	15.3159	15.6222	+	GI_GC	1.75379	0.555277	3.24264	M1BEW5	Glycine-rich RNA-binding protein
14.1836	14.5237	14.5398	14.4224	14.9261	15.2961	15.0952	15.4026	14.7751	14.8317	14.7299	14.7996	16.0927	16.2827	16.1104	16.3862	+	GI_GC	2.89531	0.762625	5.68925	M1BFL8	Nodulin family protein
14.1836	14.5237	14.5398	14.4224	14.9261	15.2961	15.0952	15.4026	14.7751	14.8317	14.7299	14.7996	16.0927	16.2827	16.1104	16.3862	+	GI_GC	2.89531	0.762625	5.68925	M1BFL9	Nodulin family protein
12.6673	12.7004	12.7796	12.6771	12.2591	12.5171	12.4893	12.5079	12.9904	12.8351	12.4506	13.1204	13.2403	13.1411	13.2324	13.4428	+	GI_GC	2.11663	-0.262772	-3.93769	M1BGN6	NOI
13.3403	13.5326	13.7006	13.6844	11.7389	12.7267	12.1046	12.7706	13.5508	13.9903	11.8097	12.6832	13.3982	13.0355	12.6443	13.455	+	GI_GC	2.45906	-1.22927	-4.65792	M1BGW4	Ankyrin
14.8565	14.9235	15.1432	14.7755	14.0381	10.0037	10.0346	9.57036	15.1856	15.408	15.2572	15.5357	10.115	15.3953	15.2035	15.3362	+	GI_GC	2.05756	-4.013	-3.8202	M1BH80	p-glycoprotein
15.0853	15.0632	15.1806	15.3803	10.1657	15.1741	10.0146	10.8817	9.74535	15.0705	11.2842	11.4607	10.4594	11.7956	11.1861	11.3327	+	GI_GC	1.59786	-3.61834	-2.96122	M1BHH6	Calmodulin binding protein
12.9364	13.5869	13.3528	13.2582	13.5587	14.1092	14.1447	14.1569	13.3114	13.8082	13.6245	13.6421	13.5782	13.8488	13.7771	14.1354	+	GI_GC	1.93471	0.708814	3.58149	M1BHI6	SCP domain-containing protein;Tho1_MOS11_C domain-containing protein
12.9364	13.5869	13.3528	13.2582	13.5587	14.1092	14.1447	14.1569	13.3114	13.8082	13.6245	13.6421	13.5782	13.8488	13.7771	14.1354	+	GI_GC	1.93471	0.708814	3.58149	M1BHI7	SCP domain-containing protein;Tho1_MOS11_C domain-containing protein
12.2033	12.8165	12.7581	12.2232	13.1469	13.5415	13.4578	13.5149	13.0915	13.5451	13.3622	13.4764	13.6745	13.7331	13.3365	13.6194	+	GI_GC	2.53496	0.914978	4.8275	M1BJ21	Poly(RC)-binding protein
10.2366	10.6262	9.2421	8.74551	11.3166	12.6585	11.8837	12.819	11.5205	11.9643	11.3517	10.8271	13.3476	13.3013	10.8923	12.5003	+	GI_GC	2.34176	2.45686	4.40326	M1BK68	ATP citrate synthase
10.4777	9.95203	10.8086	10.0293	11.5693	12.0718	10.5156	12.2997	11.1301	10.5611	10.7014	10.807	10.5617	12.8919	11.1381	10.9583	+	GI_GC	1.57337	1.2972	2.91781	M1BK68	ATP citrate synthase
11.2074	11.4701	10.434	11.1414	9.7964	9.61357	10.9085	10.0972	11.0209	11.0478	10.7727	10.3313	10.1312	11.1715	11.0141	10.9724	+	GI_GC	1.42083	-0.959322	-2.65163	M1BK86	Pre-mRNA splicing factor
13.0532	13.3998	13.316	13.1174	9.65481	11.2592	10.3615	11.1837	12.0385	11.247	13.0441	11.348	10.3514	10.8461	12.7829	13.1435	+	GI_GC	3.27808	-2.60678	-6.7221	M1BKX7	G-Box binding protein 2
14.8292	14.9495	15.0429	14.9724	15.1572	15.5955	16.0871	15.9824	14.0334	14.4716	14.3862	14.5268	14.4189	14.4441	14.1389	14.4253	+	GI_GC	1.89618	0.757053	3.50812	M1BLS2	Amino acid transporter
15.7054	16.2158	16.2527	15.9101	16.6235	17.3818	17.3538	17.3988	15.8185	16.0765	15.8583	16.108	16.8337	17.079	16.691	11.8388	+	GI_GC	2.65042	1.16847	5.09308	M1BLV2	Sugar transporter
14.5992	14.9272	13.1358	13.3349	11.8117	9.76686	10.7142	9.84819	14.6542	14.2137	14.4829	14.9823	15.0054	14.8214	14.9614	15.5386	+	GI_GC	2.73644	-3.46404	-5.29723	M1BLY5	High mobility group protein 2 HMG2
14.2911	14.7035	14.5731	14.0306	13.4255	13.9377	14.0679	14.0298	15.1659	15.3562	15.1629	15.4744	14.6671	14.8332	14.7368	14.8493	+	GI_GC	1.34722	-0.534343	-2.52544	M1BNH8	Ribulose bisphosphate carboxylase/oxygenase activase, chloroplastic
12.7962	13.1937	13.2603	13.0706	10.5745	9.1011	10.2398	10.3701	13.5228	14.1818	14.0599	14.48	13.9707	14.008	13.7534	14.1772	+	GI_GC	3.89233	-3.00882	-8.69095	M1BNS4	BRI1-KD interacting protein 130
12.7962	13.1937	13.2603	13.0706	10.1491	10.1584	9.32863	10.4798	13.5228	14.1818	14.0599	14.48	13.9707	14.008	13.7534	14.1772	+	GI_GC	4.57634	-3.05125	-11.4581	M1BNS5	BRI1-KD interacting protein 130
10.3474	11.2503	12.0413	11.5449	11.9243	12.6721	13.1538	12.8968	10.6954	11.899	10.5175	12.0639	11.2217	10.4935	9.96551	11.9666	+	GI_GC	1.66391	1.36577	3.07933	M1BNZ3	Thiamine thiazole synthase, chloroplastic
14.3071	14.6129	14.6738	14.4429	12.8515	13.1923	11.1754	13.3263	14.1589	14.6603	14.3792	14.5256	13.5127	12.4294	13.7544	13.5982	+	GI_GC	2.00415	-1.87281	-3.71551	M1BPZ2	Chlorophyll a-b binding protein, chloroplastic
17.2586	17.3772	17.4657	17.5204	17.5421	17.8916	18.0157	17.9683	17.1094	17.382	17.2915	17.4581	17.0394	17.1324	16.9462	17.1091	+	GI_GC	1.99383	0.448966	3.69544	M1BS76	RPM1 interacting protein 4 transcript 2
14.031	14.2481	14.2143	14.5254	13.8634	13.9347	13.6984	13.9321	13.8958	14.0641	13.9789	13.7441	14.0922	14.23	14.5704	14.289	+	GI_GC	1.85101	-0.397527	-3.42294	M1BSX4	Uncharacterized protein
14.031	14.2481	14.2143	14.5254	13.8634	13.9347	13.6984	13.9321	13.8958	14.0641	13.9789	13.7441	14.0922	14.23	14.5704	14.289	+	GI_GC	1.85101	-0.397527	-3.42294	M1BSX5	Uncharacterized protein
14.031	14.2481	14.2143	14.5254	13.8634	13.9347	13.6984	13.9321	13.8958	14.0641	13.9789	13.7441	14.0922	14.23	14.5704	14.289	+	GI_GC	1.85101	-0.397527	-3.42294	M1BSX6	Uncharacterized protein
15.5681	15.7983	15.9298	15.9193	14.8678	15.4277	15.5036	15.53	15.867	16.2217	16.0547	16.3068	16.1316	16.2508	15.9369	16.2526	+	GI_GC	1.42402	-0.471626	-2.65712	M1BSY1	S-acyltransferase
14.5067	14.3584	14.4031	14.231	13.0354	13.9219	13.8457	13.8218	14.2794	14.4789	14.3672	14.853	14.6644	14.7377	14.4812	14.801	+	GI_GC	1.80167	-0.718575	-3.33095	M1BSY1	S-acyltransferase
12.62	11.7908	11.8422	11.8874	10.0312	11.5273	11.5963	9.57108	12.6442	13.0053	12.8659	13.6774	13.3067	12.0534	10.0981	12.3493	+	GI_GC	1.30171	-1.35366	-2.44806	M1BSY1	S-acyltransferase
9.85995	10.3029	9.98364	9.56409	9.79834	9.24615	9.31735	8.94237	10.1169	10.774	10.7576	10.6681	11.2039	11.2049	10.7184	10.0036	+	GI_GC	1.37341	-0.601602	-2.57019	M1BT61	Succinic semialdehyde reductase isofom1
16.4834	16.9544	17.2237	16.1841	17.0704	17.5926	18.0124	17.8499	16.763	17.0858	16.9751	17.3551	17.2546	17.4403	17.0456	17.3699	+	GI_GC	1.59604	0.919946	2.95799	M1BU04	Inositol-1,4,5-triphosphate-5-phosphatase;Inositol-1,4,5-triphosphate-5-phosphatase;Inositol-1,4,5-triphosphate-5-phosphatase;Inositol-1,4,5-triphosphate-5-phosphatase;Inositol-1,4,5-triphosphate-5-phosphatase;Inositol-1,4,5-triphosphate-5-phosphatase;Inositol-1,4,5-triphosphate-5-phosphatase
16.4834	16.9544	17.2237	16.1841	17.0704	17.5926	18.0124	17.8499	16.763	17.0858	16.9751	17.3551	17.2546	17.4403	17.0456	17.3699	+	GI_GC	1.59604	0.919946	2.95799	M1BU04	Inositol-1,4,5-triphosphate-5-phosphatase;Inositol-1,4,5-triphosphate-5-phosphatase;Inositol-1,4,5-triphosphate-5-phosphatase;Inositol-1,4,5-triphosphate-5-phosphatase;Inositol-1,4,5-triphosphate-5-phosphatase;Inositol-1,4,5-triphosphate-5-phosphatase;Inositol-1,4,5-triphosphate-5-phosphatase
16.4834	16.9544	17.2237	16.1841	17.0704	17.5926	18.0124	17.8499	16.763	17.0858	16.9751	17.3551	17.2546	17.4403	17.0456	17.3699	+	GI_GC	1.59604	0.919946	2.95799	M1BU05	Inositol-1,4,5-triphosphate-5-phosphatase;Inositol-1,4,5-triphosphate-5-phosphatase;Inositol-1,4,5-triphosphate-5-phosphatase;Inositol-1,4,5-triphosphate-5-phosphatase;Inositol-1,4,5-triphosphate-5-phosphatase;Inositol-1,4,5-triphosphate-5-phosphatase;Inositol-1,4,5-triphosphate-5-phosphatase
16.4834	16.9544	17.2237	16.1841	17.0704	17.5926	18.0124	17.8499	16.763	17.0858	16.9751	17.3551	17.2546	17.4403	17.0456	17.3699	+	GI_GC	1.59604	0.919946	2.95799	M1BU05	Inositol-1,4,5-triphosphate-5-phosphatase;Inositol-1,4,5-triphosphate-5-phosphatase;Inositol-1,4,5-triphosphate-5-phosphatase;Inositol-1,4,5-triphosphate-5-phosphatase;Inositol-1,4,5-triphosphate-5-phosphatase;Inositol-1,4,5-triphosphate-5-phosphatase;Inositol-1,4,5-triphosphate-5-phosphatase
16.4834	16.9544	17.2237	16.1841	17.0704	17.5926	18.0124	17.8499	16.763	17.0858	16.9751	17.3551	17.2546	17.4403	17.0456	17.3699	+	GI_GC	1.59604	0.919946	2.95799	M1BU06	Inositol-1,4,5-triphosphate-5-phosphatase;Inositol-1,4,5-triphosphate-5-phosphatase;Inositol-1,4,5-triphosphate-5-phosphatase;Inositol-1,4,5-triphosphate-5-phosphatase;Inositol-1,4,5-triphosphate-5-phosphatase;Inositol-1,4,5-triphosphate-5-phosphatase;Inositol-1,4,5-triphosphate-5-phosphatase
16.4834	16.9544	17.2237	16.1841	17.0704	17.5926	18.0124	17.8499	16.763	17.0858	16.9751	17.3551	17.2546	17.4403	17.0456	17.3699	+	GI_GC	1.59604	0.919946	2.95799	M1BU06	Inositol-1,4,5-triphosphate-5-phosphatase;Inositol-1,4,5-triphosphate-5-phosphatase;Inositol-1,4,5-triphosphate-5-phosphatase;Inositol-1,4,5-triphosphate-5-phosphatase;Inositol-1,4,5-triphosphate-5-phosphatase;Inositol-1,4,5-triphosphate-5-phosphatase;Inositol-1,4,5-triphosphate-5-phosphatase
16.4834	16.9544	17.2237	16.1841	17.0704	17.5926	18.0124	17.8499	16.763	17.0858	16.9751	17.3551	17.2546	17.4403	17.0456	17.3699	+	GI_GC	1.59604	0.919946	2.95799	M1BU07	Inositol-1,4,5-triphosphate-5-phosphatase;Inositol-1,4,5-triphosphate-5-phosphatase;Inositol-1,4,5-triphosphate-5-phosphatase;Inositol-1,4,5-triphosphate-5-phosphatase;Inositol-1,4,5-triphosphate-5-phosphatase;Inositol-1,4,5-triphosphate-5-phosphatase;Inositol-1,4,5-triphosphate-5-phosphatase
16.4834	16.9544	17.2237	16.1841	17.0704	17.5926	18.0124	17.8499	16.763	17.0858	16.9751	17.3551	17.2546	17.4403	17.0456	17.3699	+	GI_GC	1.59604	0.919946	2.95799	M1BU07	Inositol-1,4,5-triphosphate-5-phosphatase;Inositol-1,4,5-triphosphate-5-phosphatase;Inositol-1,4,5-triphosphate-5-phosphatase;Inositol-1,4,5-triphosphate-5-phosphatase;Inositol-1,4,5-triphosphate-5-phosphatase;Inositol-1,4,5-triphosphate-5-phosphatase;Inositol-1,4,5-triphosphate-5-phosphatase
16.4834	16.9544	17.2237	16.1841	17.0704	17.5926	18.0124	17.8499	16.763	17.0858	16.9751	17.3551	17.2546	17.4403	17.0456	17.3699	+	GI_GC	1.59604	0.919946	2.95799	M1BU08	Inositol-1,4,5-triphosphate-5-phosphatase;Inositol-1,4,5-triphosphate-5-phosphatase;Inositol-1,4,5-triphosphate-5-phosphatase;Inositol-1,4,5-triphosphate-5-phosphatase;Inositol-1,4,5-triphosphate-5-phosphatase;Inositol-1,4,5-triphosphate-5-phosphatase;Inositol-1,4,5-triphosphate-5-phosphatase
16.4834	16.9544	17.2237	16.1841	17.0704	17.5926	18.0124	17.8499	16.763	17.0858	16.9751	17.3551	17.2546	17.4403	17.0456	17.3699	+	GI_GC	1.59604	0.919946	2.95799	M1BU08	Inositol-1,4,5-triphosphate-5-phosphatase;Inositol-1,4,5-triphosphate-5-phosphatase;Inositol-1,4,5-triphosphate-5-phosphatase;Inositol-1,4,5-triphosphate-5-phosphatase;Inositol-1,4,5-triphosphate-5-phosphatase;Inositol-1,4,5-triphosphate-5-phosphatase;Inositol-1,4,5-triphosphate-5-phosphatase
16.4834	16.9544	17.2237	16.1841	17.0704	17.5926	18.0124	17.8499	16.763	17.0858	16.9751	17.3551	17.2546	17.4403	17.0456	17.3699	+	GI_GC	1.59604	0.919946	2.95799	M1BU09	Inositol-1,4,5-triphosphate-5-phosphatase;Inositol-1,4,5-triphosphate-5-phosphatase;Inositol-1,4,5-triphosphate-5-phosphatase;Inositol-1,4,5-triphosphate-5-phosphatase;Inositol-1,4,5-triphosphate-5-phosphatase;Inositol-1,4,5-triphosphate-5-phosphatase;Inositol-1,4,5-triphosphate-5-phosphatase
16.4834	16.9544	17.2237	16.1841	17.0704	17.5926	18.0124	17.8499	16.763	17.0858	16.9751	17.3551	17.2546	17.4403	17.0456	17.3699	+	GI_GC	1.59604	0.919946	2.95799	M1BU09	Inositol-1,4,5-triphosphate-5-phosphatase;Inositol-1,4,5-triphosphate-5-phosphatase;Inositol-1,4,5-triphosphate-5-phosphatase;Inositol-1,4,5-triphosphate-5-phosphatase;Inositol-1,4,5-triphosphate-5-phosphatase;Inositol-1,4,5-triphosphate-5-phosphatase;Inositol-1,4,5-triphosphate-5-phosphatase
16.4834	16.9544	17.2237	16.1841	17.0704	17.5926	18.0124	17.8499	16.763	17.0858	16.9751	17.3551	17.2546	17.4403	17.0456	17.3699	+	GI_GC	1.59604	0.919946	2.95799	M1C8R7	Inositol-1,4,5-triphosphate-5-phosphatase;Inositol-1,4,5-triphosphate-5-phosphatase;Inositol-1,4,5-triphosphate-5-phosphatase;Inositol-1,4,5-triphosphate-5-phosphatase;Inositol-1,4,5-triphosphate-5-phosphatase;Inositol-1,4,5-triphosphate-5-phosphatase;Inositol-1,4,5-triphosphate-5-phosphatase
16.4834	16.9544	17.2237	16.1841	17.0704	17.5926	18.0124	17.8499	16.763	17.0858	16.9751	17.3551	17.2546	17.4403	17.0456	17.3699	+	GI_GC	1.59604	0.919946	2.95799	M1C8R7	Inositol-1,4,5-triphosphate-5-phosphatase;Inositol-1,4,5-triphosphate-5-phosphatase;Inositol-1,4,5-triphosphate-5-phosphatase;Inositol-1,4,5-triphosphate-5-phosphatase;Inositol-1,4,5-triphosphate-5-phosphatase;Inositol-1,4,5-triphosphate-5-phosphatase;Inositol-1,4,5-triphosphate-5-phosphatase
15.1175	15.5105	15.667	15.5949	15.5738	16.0723	16.4368	16.3076	15.1763	15.5545	15.4252	15.6917	15.6859	15.9074	15.4781	15.7334	+	GI_GC	1.48499	0.625153	2.76275	M1BU04	Inositol-1,4,5-triphosphate-5-phosphatase;Inositol-1,4,5-triphosphate-5-phosphatase;Inositol-1,4,5-triphosphate-5-phosphatase;Inositol-1,4,5-triphosphate-5-phosphatase;Inositol-1,4,5-triphosphate-5-phosphatase;Inositol-1,4,5-triphosphate-5-phosphatase;Inositol-1,4,5-triphosphate-5-phosphatase
15.1175	15.5105	15.667	15.5949	15.5738	16.0723	16.4368	16.3076	15.1763	15.5545	15.4252	15.6917	15.6859	15.9074	15.4781	15.7334	+	GI_GC	1.48499	0.625153	2.76275	M1BU05	Inositol-1,4,5-triphosphate-5-phosphatase;Inositol-1,4,5-triphosphate-5-phosphatase;Inositol-1,4,5-triphosphate-5-phosphatase;Inositol-1,4,5-triphosphate-5-phosphatase;Inositol-1,4,5-triphosphate-5-phosphatase;Inositol-1,4,5-triphosphate-5-phosphatase;Inositol-1,4,5-triphosphate-5-phosphatase
15.1175	15.5105	15.667	15.5949	15.5738	16.0723	16.4368	16.3076	15.1763	15.5545	15.4252	15.6917	15.6859	15.9074	15.4781	15.7334	+	GI_GC	1.48499	0.625153	2.76275	M1BU06	Inositol-1,4,5-triphosphate-5-phosphatase;Inositol-1,4,5-triphosphate-5-phosphatase;Inositol-1,4,5-triphosphate-5-phosphatase;Inositol-1,4,5-triphosphate-5-phosphatase;Inositol-1,4,5-triphosphate-5-phosphatase;Inositol-1,4,5-triphosphate-5-phosphatase;Inositol-1,4,5-triphosphate-5-phosphatase
[truncated: 132 more rows]

## Sheet: Sig II vs IC
GC1	GC2	GC3	GC4	GI1	GI2	GI3	GI4	IC1	IC2	IC3	IC4	II1	II2	II3	II4	Student's T-test Significant II_IC	Student's T-test significant	-Log Student's T-test p-value II_IC	FC	Student's T-test Test statistic II_IC	Protein Id	Protein Descriptions
[truncated: 590 more rows]
